# Supplementary material for: Mechanism of Melatonin Metabolism by CYP1A1: What Determines the Bifurcation Pathways of Hydroxylation versus Deformylation?
Source: PubMed Central journal article supplement (PMC9706573; doi:10.1021/acs.jpcb.2c07200), 2022-11-16
Supplement: jp2c07200_si_001.pdf [file jp2c07200_si_001.pdf]

## Supporting Information

### Mechanism of Melatonin Metabolism by CYP1A1. What Determines the Bifurcation Pathways of Hydroxylation Versus Deformylation?

Thirakorn Mekkawes,<sup>§,‡</sup> Ze Qing Lim,<sup>§,‡</sup> and Sam P. de Visser<sup>\*§,‡</sup>

<sup>§</sup> Manchester Institute of Biotechnology, The University of Manchester, 131 Princess Street, Manchester M1 7DN, United Kingdom

<sup>‡</sup> Department of Chemical Engineering, The University of Manchester, Oxford Road, Manchester M13 9PL, United Kingdom

Email: [sam.devisser@manchester.ac.uk](mailto:sam.devisser@manchester.ac.uk)

## Methodology

### Primary model preparation

CYP1A1 was selected as the main enzyme for this study. Currently, there were 3 PDB structures of CYP1A1 in the Protein Databank<sup>1</sup> which we analysed in detail. All three PDB structures are from human CYP1A1 origin and had different substrates bound. The chain A of the 6DWN<sup>2</sup> PDB structure was selected as it is the latest released structure and with good resolution. The pdb has erlotinib<sup>3</sup> in the active site and its structure is the closest to the metabolism of melatonin. Melatonin was taken from PDB ML1<sup>4</sup> and re-optimized using quantum mechanics methods in Gaussian-09<sup>5</sup> with neutral charge and singlet multiplicity. The optimised structure of melatonin was converted to a PDB file with the Antechamber<sup>6</sup> software package provided on AmberTools 2018<sup>6</sup>. The CYP1A1 structure was modified by removing erlotinib and the heme iron complex was changed into compound I by adding an oxygen atom over the central iron atom with bond length 1.686 Å and an water molecule was added nearby heme and I helix. All modifications were done on Chimera<sup>7</sup>. The optimised melatonin geometry was docked into the active site of the modified CYP1A1 structure by AutoDock Vina<sup>8</sup>. The docking resulted in 4 low-energy models whereby the orientation of the substrate was different. The grid boxes were adjusted manually which were generally placed into the centre of enzyme active site containing Compound I, I helix and G helix. The maximum energy difference between the best binding mode and the worst one was set to 2 kcal/mol. The maximum number of binding modes was set to 10. The four low-energy binding poses were selected and used for further MD studies.

Apart from structures of CYP1A1 with CpdI and substrate, we also created a product complex of methoxy-hydroxylated melatonin with an iron(III)-heme complex. Docking of methoxy-hydroxylated melatonin in the structure gave eight low-energy conformations that were subjected to MD simulations.

### MD simulation

As the structure contains a metal atom in the Compound I state, the iron-ligand parameters had to be optimised for the forcefield that was used. This process made sure that the iron atom maintained 6 ligands, including 4 bonds to the heme, 1 ligand to the oxygen atom and 1 ligand to the axial cysteinate on the L helix. The MCPB.py<sup>9</sup> and Gaussian software packages were used to obtain the correct forcefield parameters for the ferryl core of the heme and nearby atoms in the porphyrin. Amber's Antechamber utility was applied to generate MD parameters for Compound I and melatonin substrate. Amber's tleap software package was applied to solvate the selected models in TIP3P<sup>10</sup> water and to generate the correct topology file to conduct MD simulations using the ff14SB<sup>11</sup> force field. For each complex, a rectangular box with 10 Å distance between the box edges and the protein was considered, resulting in around 14,600 water molecules for each system. Na<sup>+</sup> and Cl<sup>-</sup> ions were added to neutralize the system. Minimization, heating, and MD productions were all performed with Amber's pmemd<sup>12</sup> utility. Minimization of each structure was carried out in only one step without restrains by setting steepest descent to 2000 cycles. Heating of each structure was heated up from 0 to 310 K by 100 ps. Finally, an MD production run was performed for 100 ns under constant temperature and pressure conditions at 310 K and 1 bar by running 20 times of 5 ns simulation.

## QM model preparation

The calculated structures of model I to IV were analysed by python-based software packaged named Pytraj.py<sup>13</sup>. The model visualisation was presented by VMD<sup>14</sup>. The following values were extracted from the topologies and trajectories files:

**Binding pose:** binding poses were collected from the production of MD simulation in order to check the changes of the substrate orientation and residue interaction at 60 ns, 80 ns and 100 ns because after 50 ns all models had stable structures with the RMSDs.

**RMSD:** the Root Mean Square Deviation (RMSD) of the structural changes for each model from the MD runs were analysed and we made sure that the protein had equilibrated. RMSD values were also checked for specific residues within the protein as well as for the full system.

**Bond length:** bond lengths of the specific atoms were extracted in order to get the information for model selection for the QM calculations.

**Hydrogen bonds:** during the MD simulations from 0 ns to 100 ns, the substrate often was seen to interact with nearby residues. Hydrogen bonding interactions were extracted from the MD runs to establish if the melatonin was in a specific orientation and stayed rigid or not. Melatonin was treated as donor and acceptor. Based on these structures some hydrogen bonds were deemed important and were included in the QM active site cluster.

**Overall structure visualisation:** after the MD simulations a cluster model was created and studied in Gaussian-09 with density functional theory methods. The output files were visualized in Chemcraft<sup>15</sup>.

## QM calculations

The active site models of CYP1A1 were calculated in Gaussian09. The models with Compound I, which include Fe atom, were carried out by hybrid basis sets including:

- Basis set 1 (BS1): UB3LYP 6-31G\* : C, H, O, N, and S // LANL2DZ+ECP: Fe
- Basis set 2 (BS2): UB3LYP 6-311+G\* : C, H, O, N, and S // LANL2DZ+ECP: Fe
- Basis set 3 (BS3): UB3LYP 6-311+G\* : C, H, O, N, and S // cc-pVTZ : Fe

The models with and without Fe atom were calculated in the doublet and quartet spin states with -2 charge, and singlet multiplicities with neutral charge respectively. We ran geometry optimizations for reactants, intermediates and products, as well as transition states. The optimised models were calculated with method BS1 and followed by a single point calculation at level BS2, solvation. The scanning calculation was performed by BS1 on quintet multiplicities. The frequency calculation was carried at temperature = 298.15 K (25°C).

## Data analysis

The deep analysis was carried by Python<sup>16</sup> and R<sup>17</sup> based scripts on a Jupyter-notebook<sup>18</sup> and R studio<sup>19</sup> respectively. In addition, the presented data was extracted by data-mining python software. The tunnels occurring the MD simulation were

analysed by the CAVER<sup>20</sup>. The tunnels were reported with their lengths and widths in angstroms.

## References

1. Berman, H. M.; Westbrook, J.; Feng, Z.; Gilliland, G.; Bhat, T. N.; Weissig, H.; Shindyalov, I. N.; Bourne, P. E. The Protein Data Bank. *Nucl. Acids Res.* **2000**, *28*, 235-242.
2. Bart, A. G.; Scott, E. E. Structures of human cytochrome P450 1A1 with bergamottin and erlotinib reveal active-site modifications for binding of diverse ligands. *J. Biol. Chem.* **2018**, *293*, 19201-19210.
3. Kim, Y.; Lee, S.-H.; Ahn, J. S.; Ahn, M.-J.; Park, K.; Sun, J.-M. Efficacy and Safety of Afatinib for EGFR-mutant Non-small Cell Lung Cancer, Compared with Gefitinib or Erlotinib, *Cancer Res. Treat.* **2019**, *51*, 502-509.
4. Wang, L.; Erlandsen, H.; Haavik, J.; Knappskog, P. M.; Stevens, R. C. Three-dimensional structure of human tryptophan hydroxylase and its implications for the biosynthesis of the neurotransmitters serotonin and melatonin. *Biochemistry.* **2002**, *41*, 12569-12574.
5. Wang, J.; Wang, W.; Kollman, P. A.; Case, D. A. ANTECHAMBER: an accessory software package for molecular mechanical calculations. *J. Chem. Inform. Comput. Sci.* **2000**, *222*, 11-30.
6. Case, D. A.; Ben-Shalom, I. Y.; Brozell, S. R.; Cerutti, D. S.; Cheatham, III, T. E.; Cruzeiro, V. W. D.; Darden, T. A.; Duke, R. E.; Ghoreishi, D.; Gilson, M. K.; Gohlke, H.; Goetz, A. W.; Greene, D.; Harris, R.; Homeyer, N.; Huang, Y.; Izadi, S.; Kovalenko, A.; Kurtzman, T.; Lee, T. S.; LeGrand, S.; Li, P.; Lin, C.; Liu, J.; Luchko, T.; Luo, R.; Mermelstein, D. J.; Merz, K. M.; Miao, Y.; Monard, G.; Nguyen, C.; Nguyen, H.; Omelyan, I.; Onufriev, A.; Pan, F.; Qi, R.; Roe, D. R.; Roitberg, A.; Sagui, C.; Schott-Verdugo, S.; Shen, J.; Simmerling, C. L.; Smith, J.; Salomon-Ferrer, R.; Swails, J.; Walker, R. C.; Wang, J.; Wei, H.; Wolf, R. M.; Wu, X.; Xiao, L.; York, D. M.; Kollman, P. A. AMBER-2018, University of California, San Francisco, 2018.
7. Pettersen, E. F.; Goddard, T. D.; Huang, C. C.; Couch, G. S.; Greenblatt, D. M.; Meng, E. C.; Ferrin, T. E. UCSF Chimera - A Visualization System for Exploratory Research and Analysis. *J. Comput. Chem.* **2004**, *25*, 1605-1612.
8. Trott, O.; Olson, A. J. AutoDock Vina: improving the speed and accuracy of docking with a new scoring function, efficient optimization and multithreading. *J. Comput. Chem.* **2010**, *31*, 455-461.
9. Li, P.; Merz, K. M. MCPB.py: A Python Based Metal Center Parameter Builder. *J. Chem. Inf. Model.* **2016**, *56*, 599-604.
10. Jorgensen, W. L.; Chandrasekhar, J.; Madura, J. D.; Impey, R. W.; Klein, M. L. Comparison of simple potential functions for simulating liquid water. *J. Chem. Phys.* **1983**, *79*, 926-935.
11. Maier, J. A.; Martinez, C.; Kasavajhala, K.; Wickstrom, L.; Hauser, K. E.; Simmerling, C. ff14SB: Improving the accuracy of protein side chain and backbone parameters from ff99SB. *J. Chem. Theory Comput.* **2015**, *11*, 3696-3713.
12. Andreas W. Götz, Mark J. Williamson, Dong Xu, Duncan Poole, Scott Le Grand, and Ross C. Walker
13. Journal of Chemical Theory and Computation. **2012**, *8*, 1542-1555.
14. *Pytraj*. **2015**, Available: <https://github.com/Amber-MD/pytraj>.
15. Humphrey, W.; Dalke, A.; Schulten, K. VMD: Visual molecular dynamics. *J. Molec. Graph.* **1996**, *14*, 33-38.
16. *ChemCraft 1.8*. **2021**, Available: <http://www.chemcraftprog.com/index.html>.
17. *Python reference manual. Centrum voor Wiskunde en Informatica Amsterdam*. **1995**, Available: <https://www.python.org>.
18. Team, R. C. A language and environment for statistical computing. Foundation for Statistical Computing, Vienna, Austria., **2020**. Available: <https://www.R-project.org/>.
19. *Jupyter Notebooks - a publishing format for reproducible computational workflows*. In Positioning and Power in Academic Publishing: Players, Agents and Agendas. Loizides, F.; Schmidt, B. (Eds.); **2016**, pp. 87-90, Available: <https://jupyter.org>.
20. *RStudio: Integrated Development for R. RStudio, Inc., Boston, MA*. **2019**. Available: <http://www.rstudio.com/>.
21. Chovancová, E.; Pavelka, A.; Beneš, P.; Strnad, O.; Brezovský, J.; Kozlíková, B.; Gora, A.; Šustr, V.; Klvaňa, M.; Medek, P.; Biedermannová, L.; Sochor, J.; Damborský, J. CAVER 3.0: A Tool for the Analysis of Transport Pathways in Dynamic Protein Structures, *PLoS Comput. Biol.* **2012**, *8*, e1002708.

## Primary model preparation

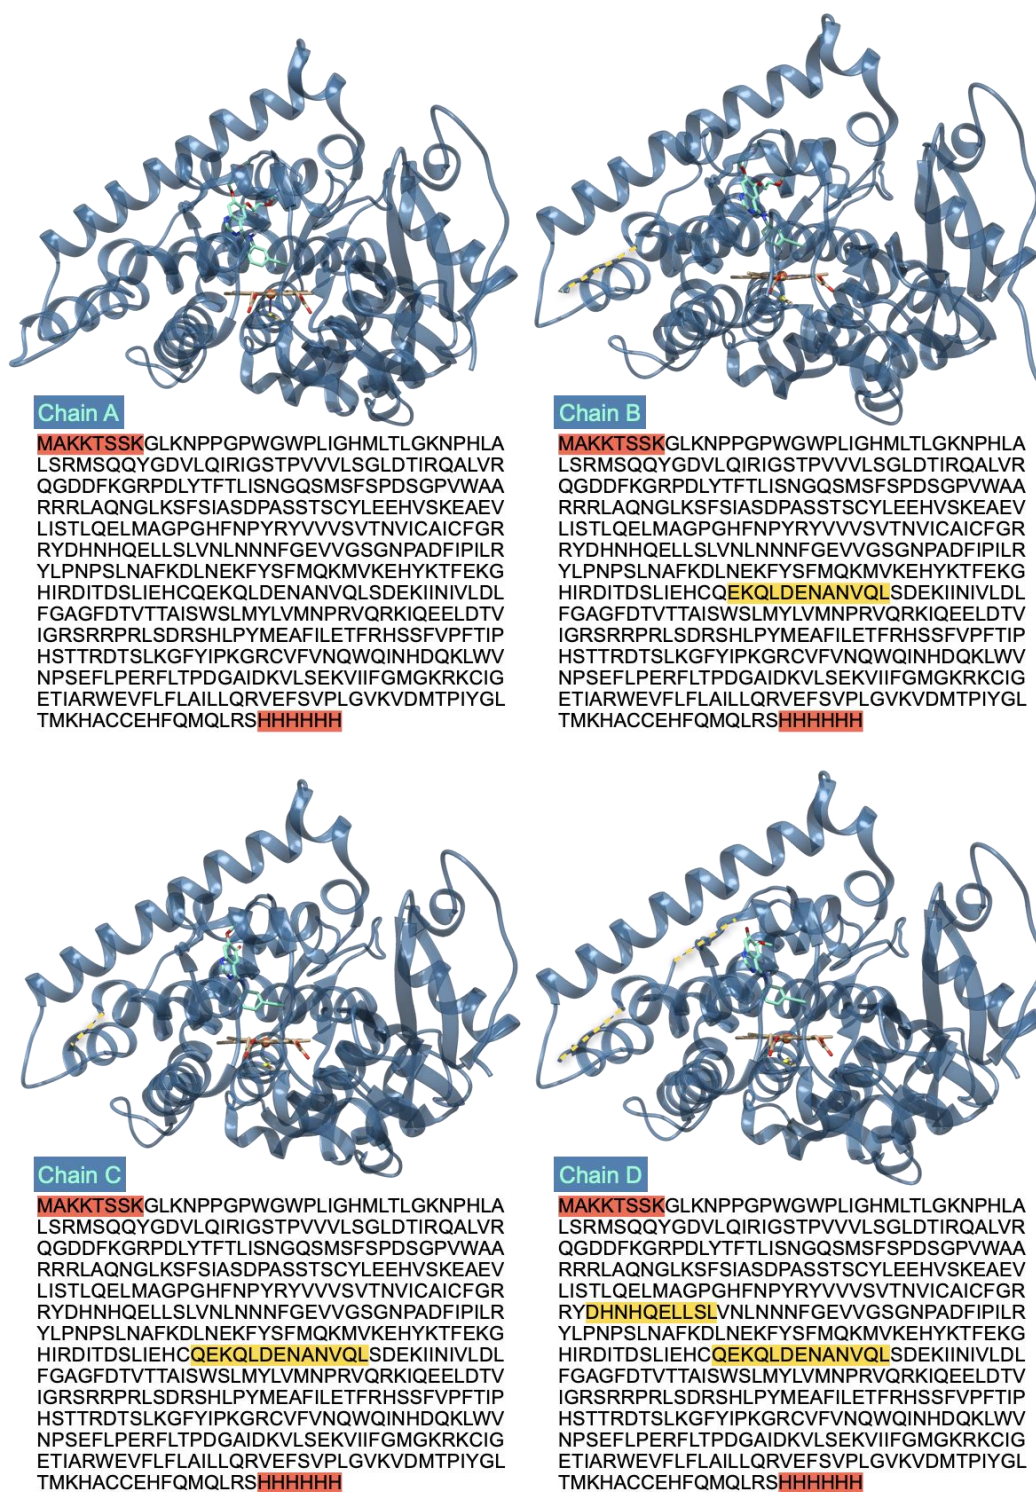

**Figure S1.** Extracts of the 6DWN PDB file. There are chain A to D. The chain A was used in this work by removing the existing substrate, Erlotinib. The residue sequences of chain A, B, C and D of 6DWN enzyme. Each chain has 512 residues. The missing residues in the middle and terminus are highlighted in yellow and red respectively.

## MD simulation results.

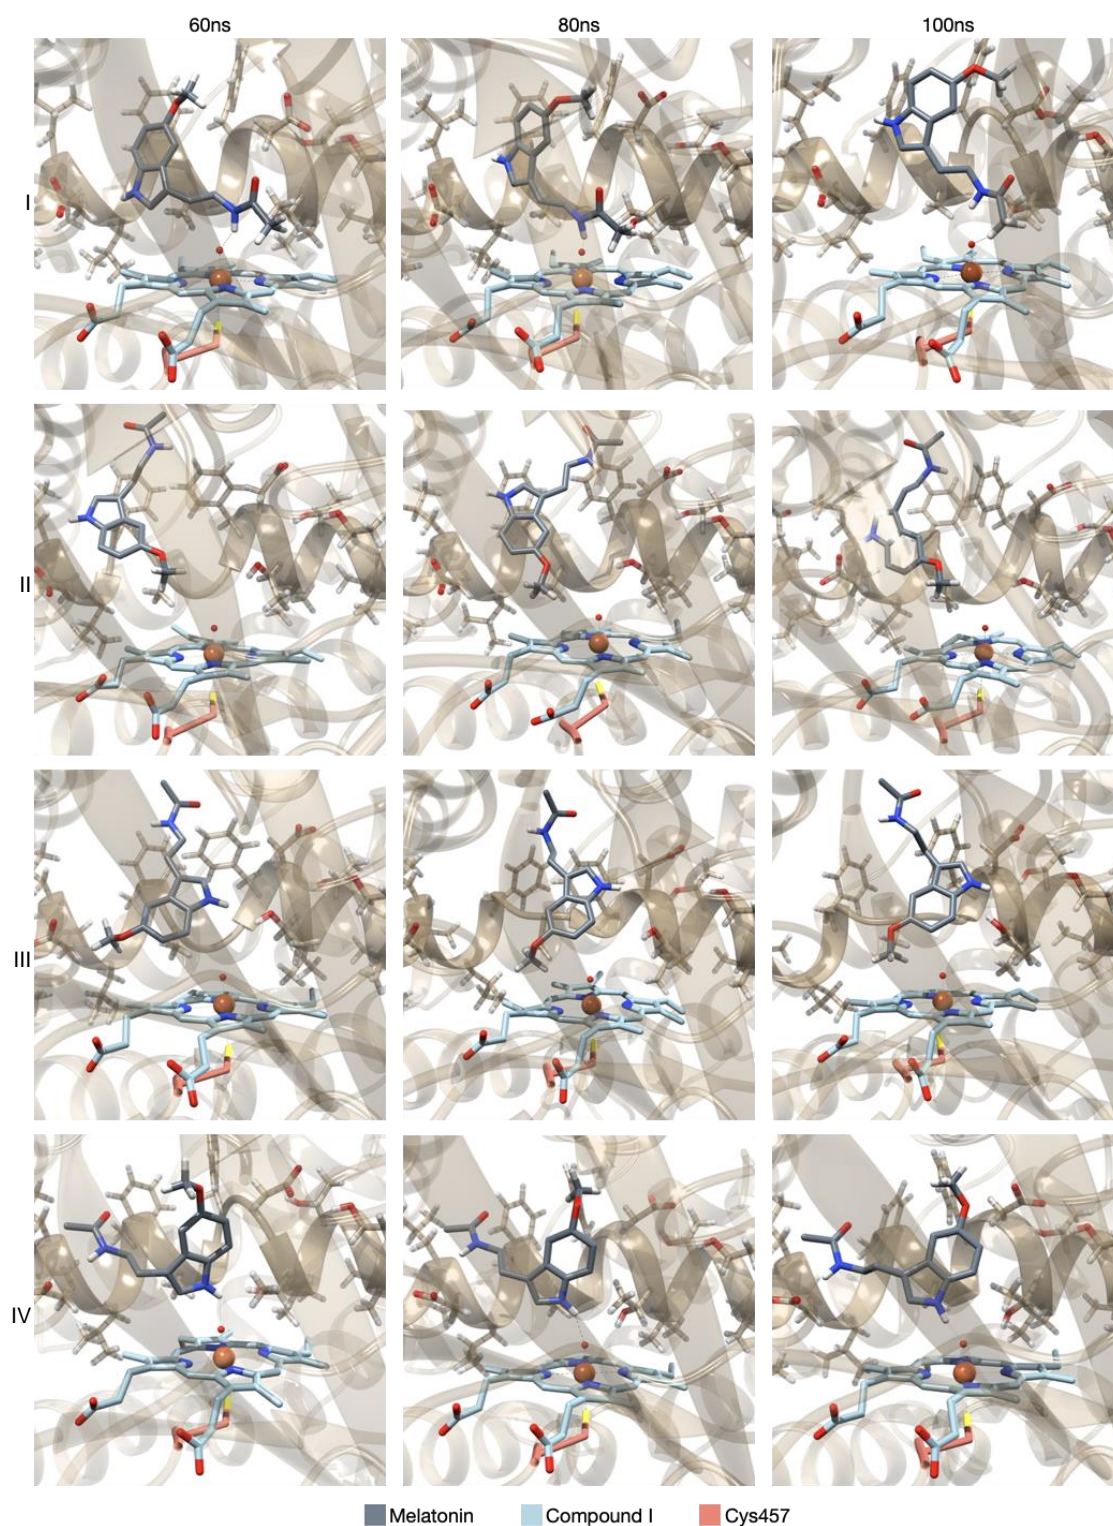

**Figure S2.** Selected binding poses of substrate versus CpdI as obtained from snapshots after 60, 80 or 100 ns from the MD simulations for CYP1A1 with melatonin with substrate starting orientation I, II, III and IV. Each MD was calculated from AutoDock Vina. The docking scores for each model were -9.4, -8.5, -6.5 and -7.0.

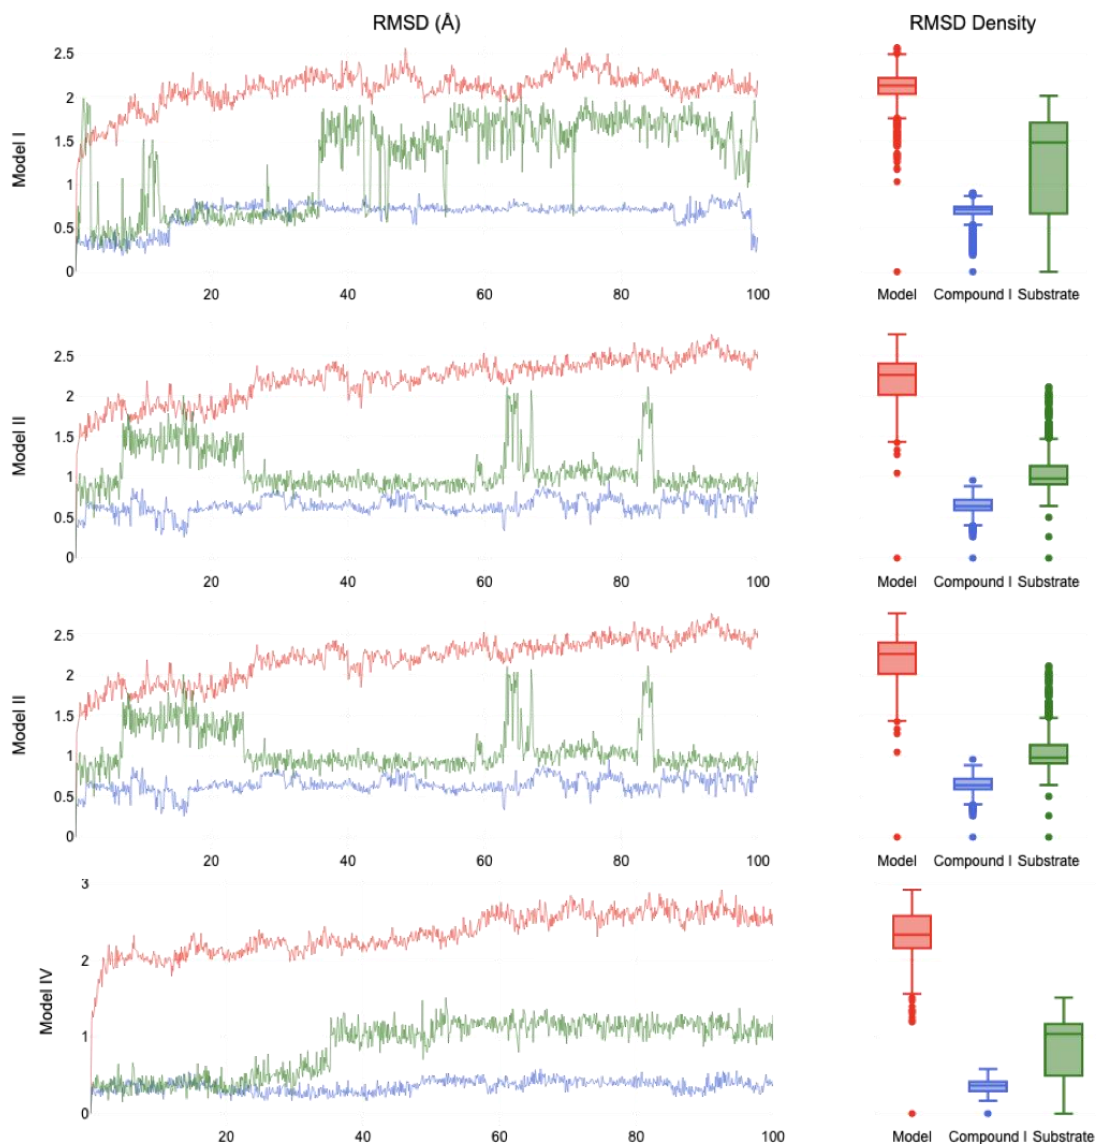

**Figure S3.** RMSD plots obtained from the MD simulations for CYP1A1 with melatonin with substrate starting orientation **I**, **II**, **III** and **IV** during a 100 ns MD calculation. The right-hand-side shows the individual RMSD values of the whole model (in red), Compound I only (in blue) and substrate only (in green).



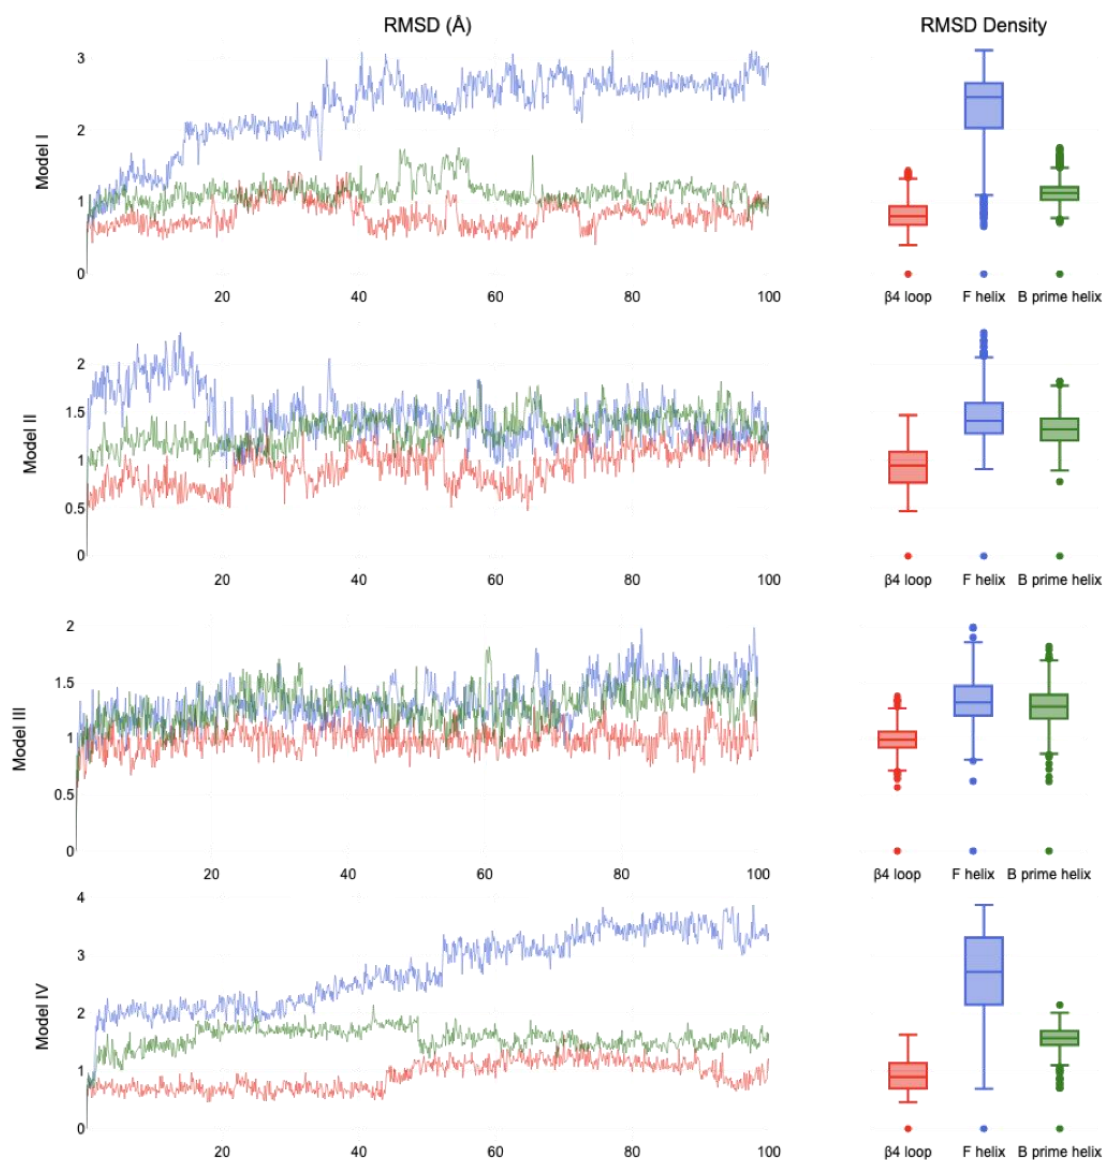

**Figure S4.** RMSD plots obtained from the MD simulations for CYP1A1 with melatonin with substrate starting orientation **I**, **II**, **III** and **IV** during a 100 ns MD calculation focusing on the change of the protein helices. The right-hand-side shows the individual RMSD values of the  $\beta$ 4 loop (in red), the F-helix (in blue) and the B' helix (in green).

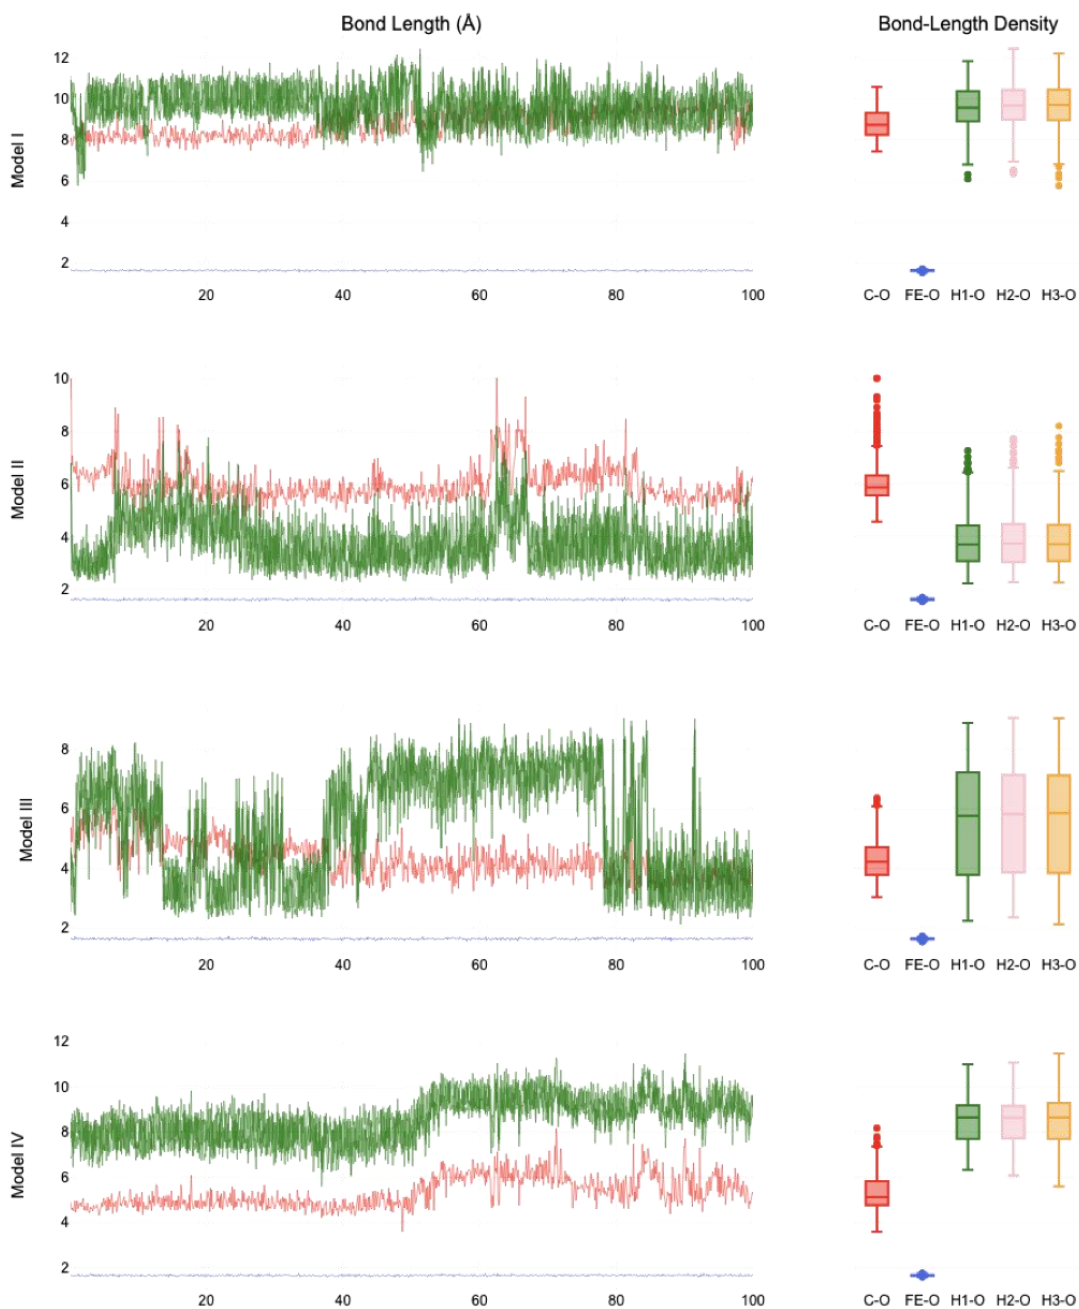

**Figure S5.** Bond length changes of key interactions obtained from the MD simulations for CYP1A1 with melatonin with substrate starting orientation **I**, **II**, **III** and **IV** during a 100 ns MD calculation. The right-hand-side shows the individual bond lengths for the C<sup>6</sup>-O distance (in red), Fe-O distance (in blue), and the three methoxy H-O distances (in green, pink and yellow).

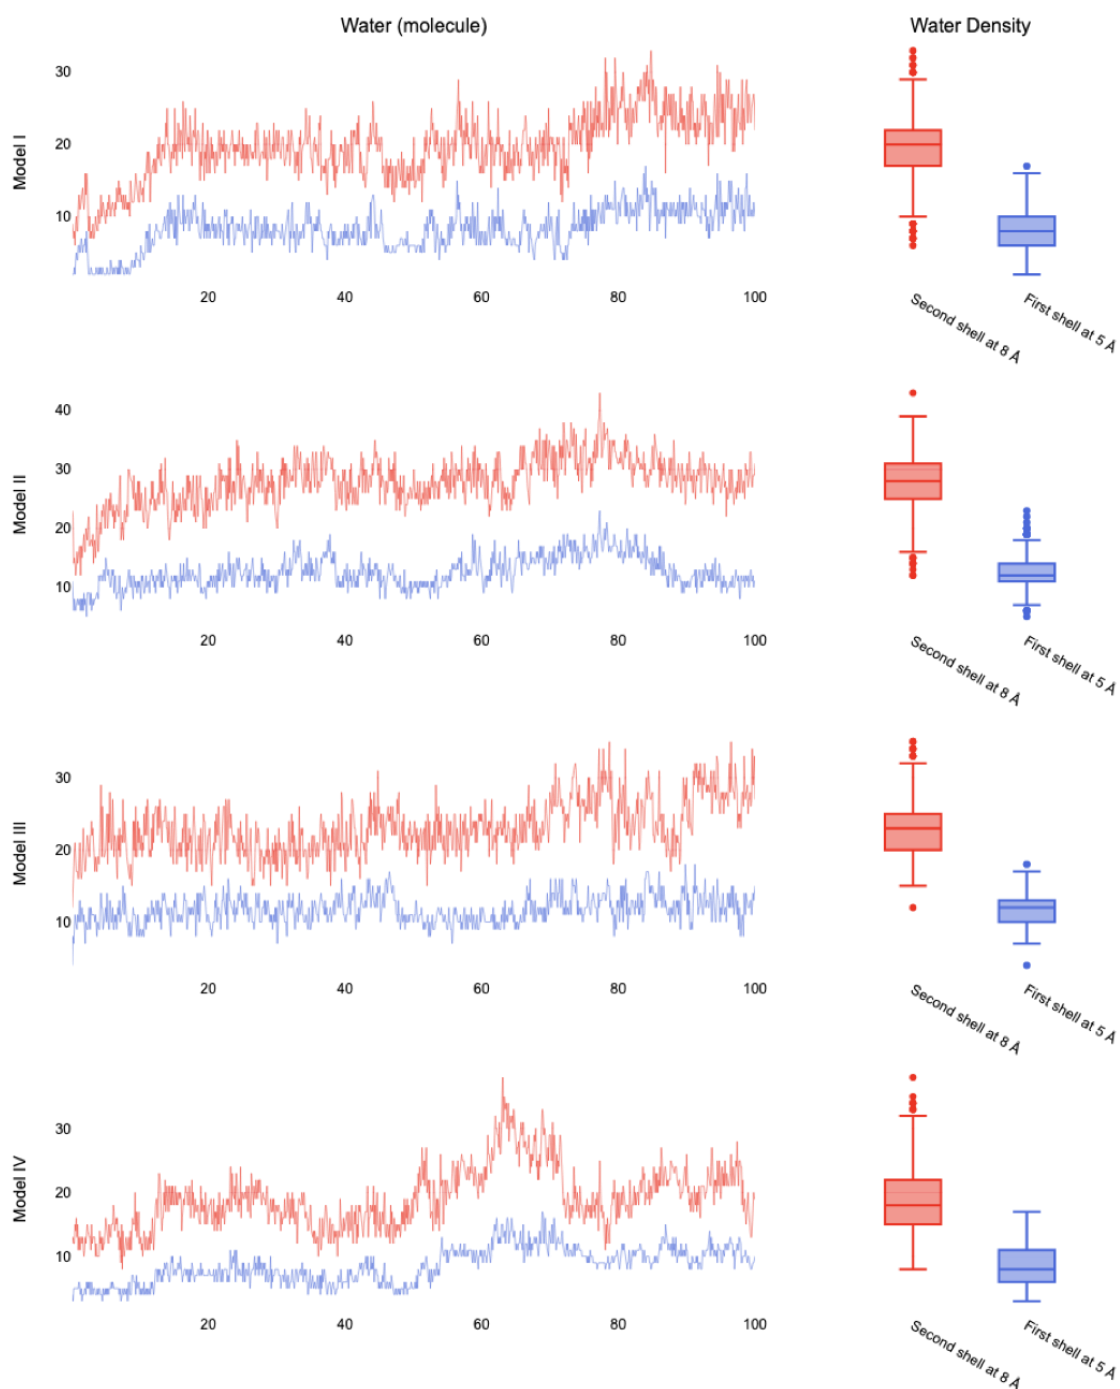

**Figure S6.** Protein solvation analysis obtained from the MD simulations for CYP1A1 with melatonin with substrate starting orientation **I**, **II**, **III** and **IV** during a 100 ns MD calculation focusing on the change of the protein helices. The right-hand-side counts the number of water molecules within a radius of CpdI of 5 Å (in blue) and within 8 Å (in red).

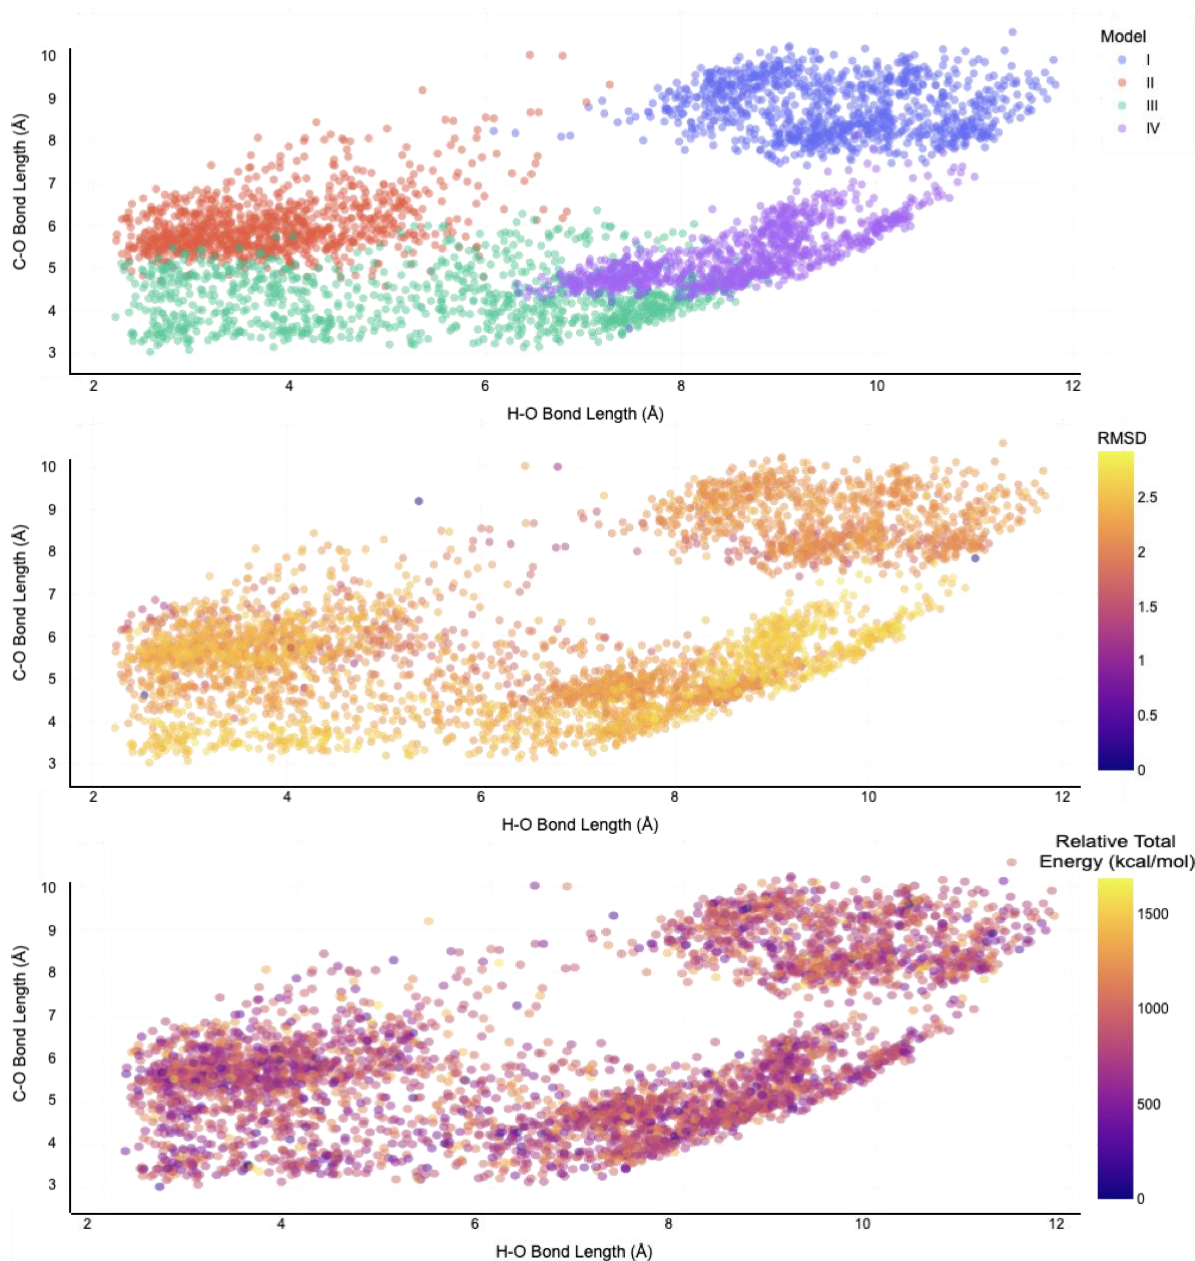

**Figure S7.** Analysis of position and orientation of the substrate with respect to CpdI from the MD simulations on CYP1A1 with melatonin with substrate starting orientation I, II, III and IV during a 100 ns. (a) Distance distribution from MD results of reactant models. The x-axis is the bond length between the hydrogen atom of the methoxy side chain of melatonin and the oxygen atom of Compound I, while the y-axis is the bond length between the carbon atom (C<sup>6</sup>) of melatonin and the oxygen atom of Compound I. (b) RMSD value for individual snapshots. (c) Total energy of individual snapshots.

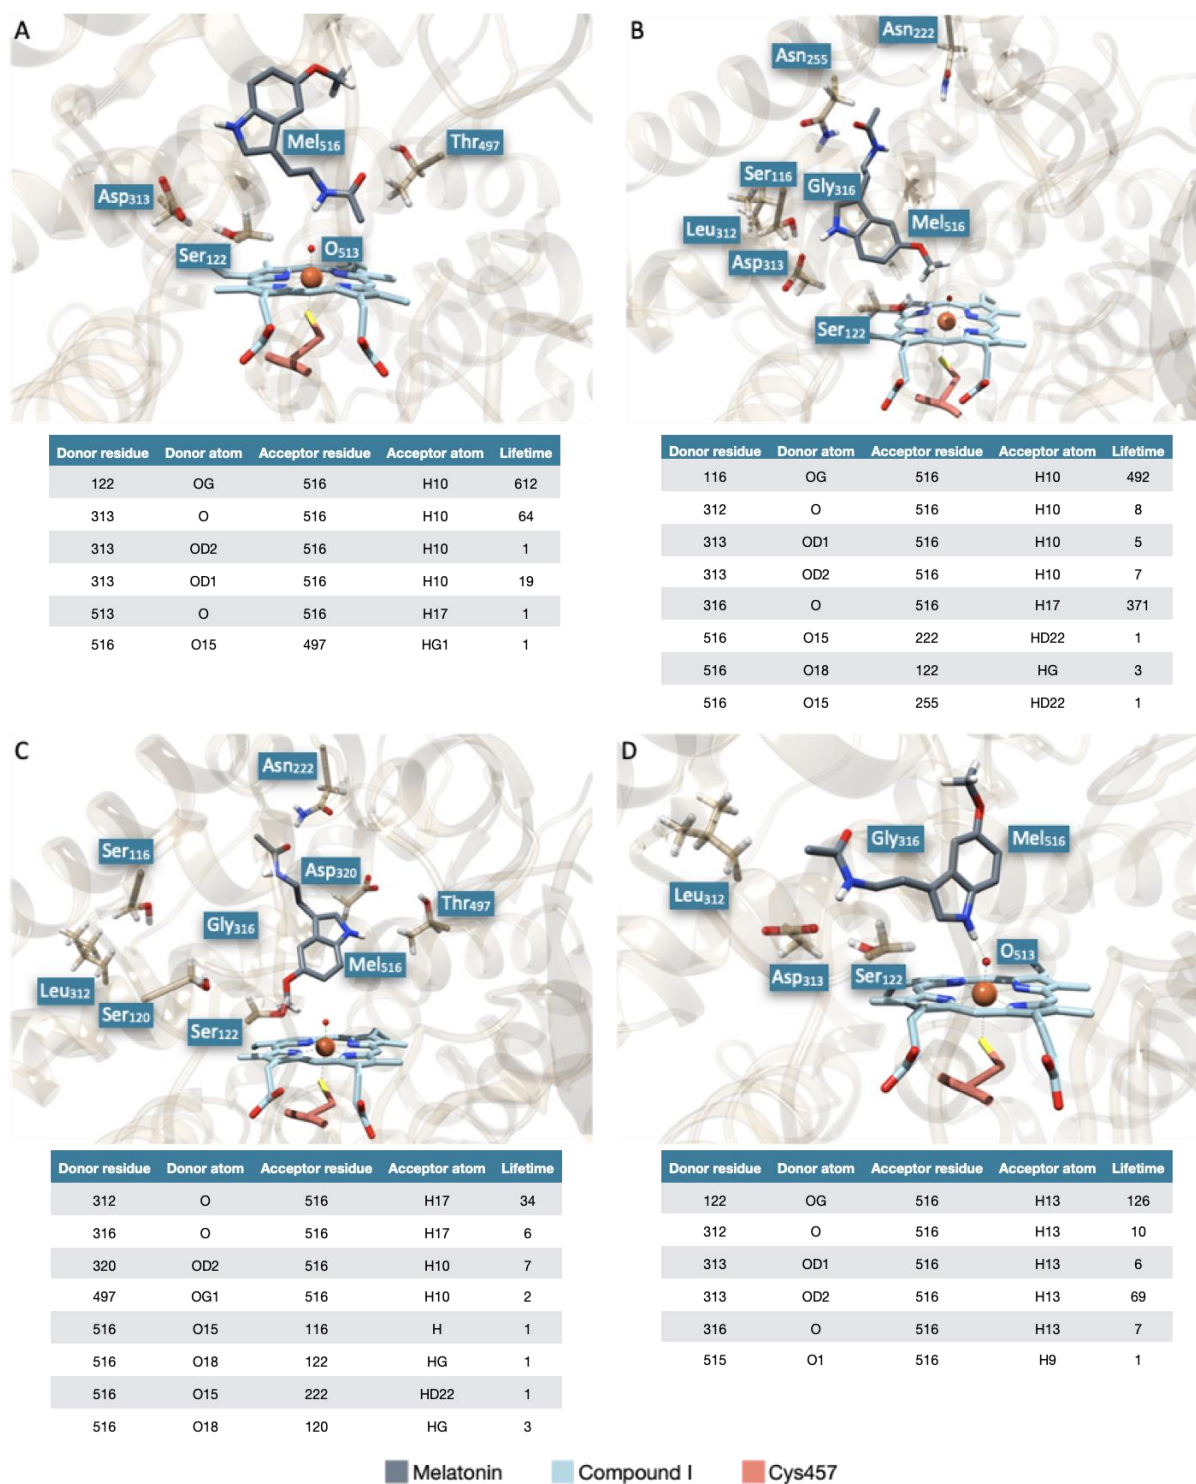

**Figure S8.** Key hydrogen bonding interactions of the substrate in the substrate-binding pocket of CYP1A1 as listed for model I (part A), II (part B), III (part C), and IV (part D). Data obtained from the MD simulations. Lifetime is the occurrence of each hydrogen bonds presented in frame from 1000 frames simulated by 100 ns.

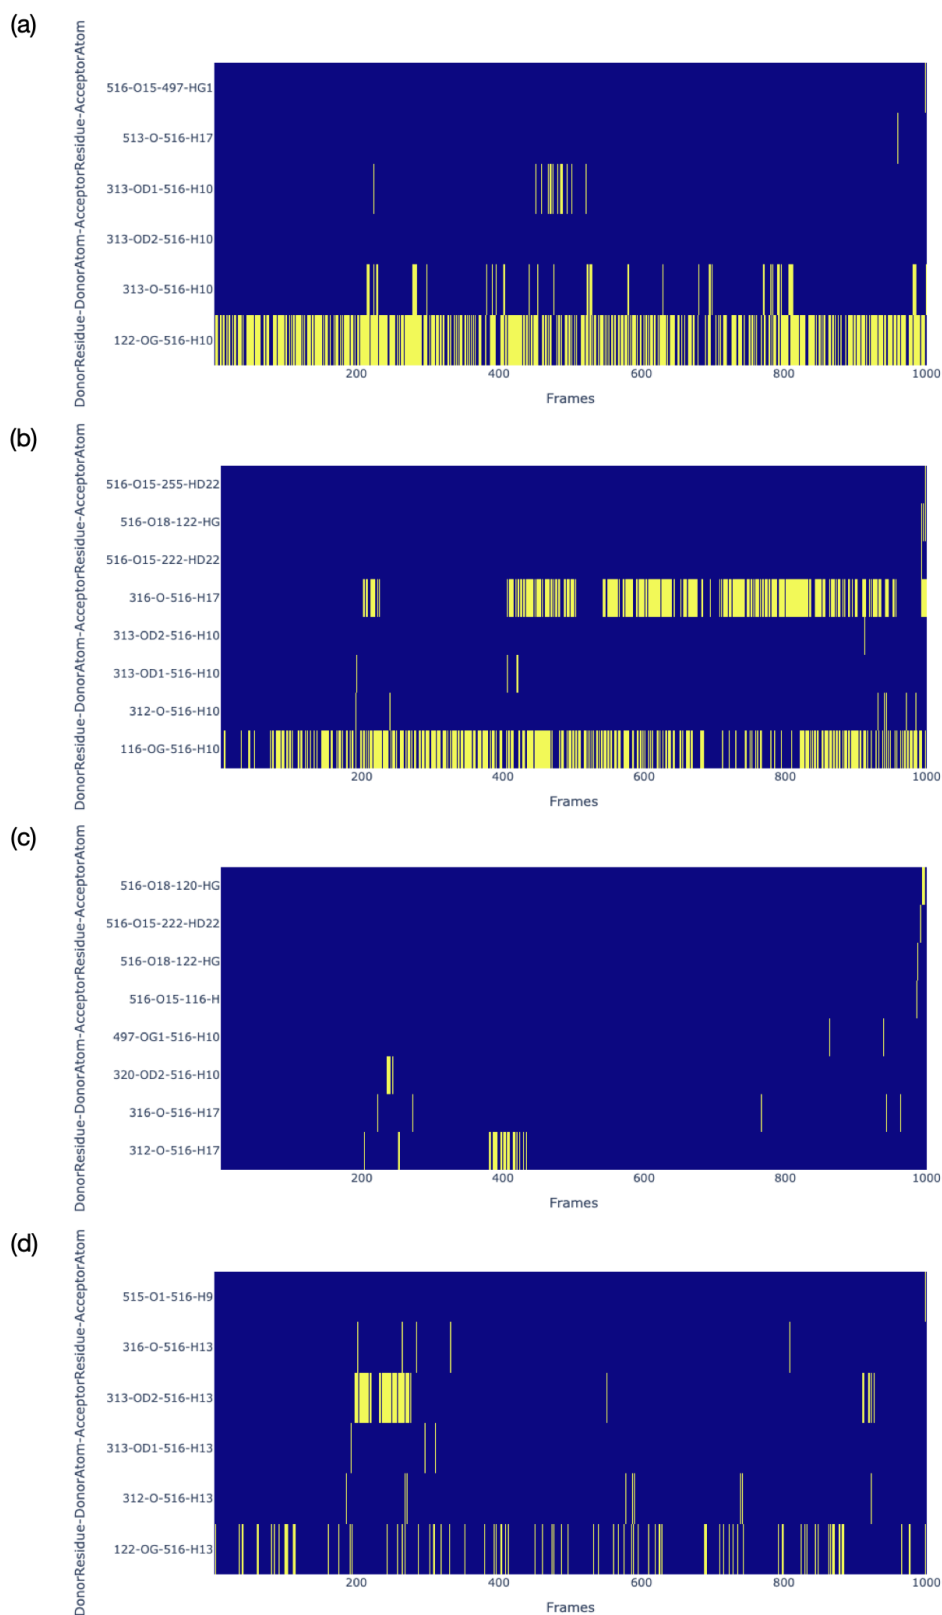

**Figure S9.** Selected hydrogen bonds and their lifetime during the MD simulations. Yellow and blue mean appear and disappear. The hydrogen bonds are also listed in Fig S8.

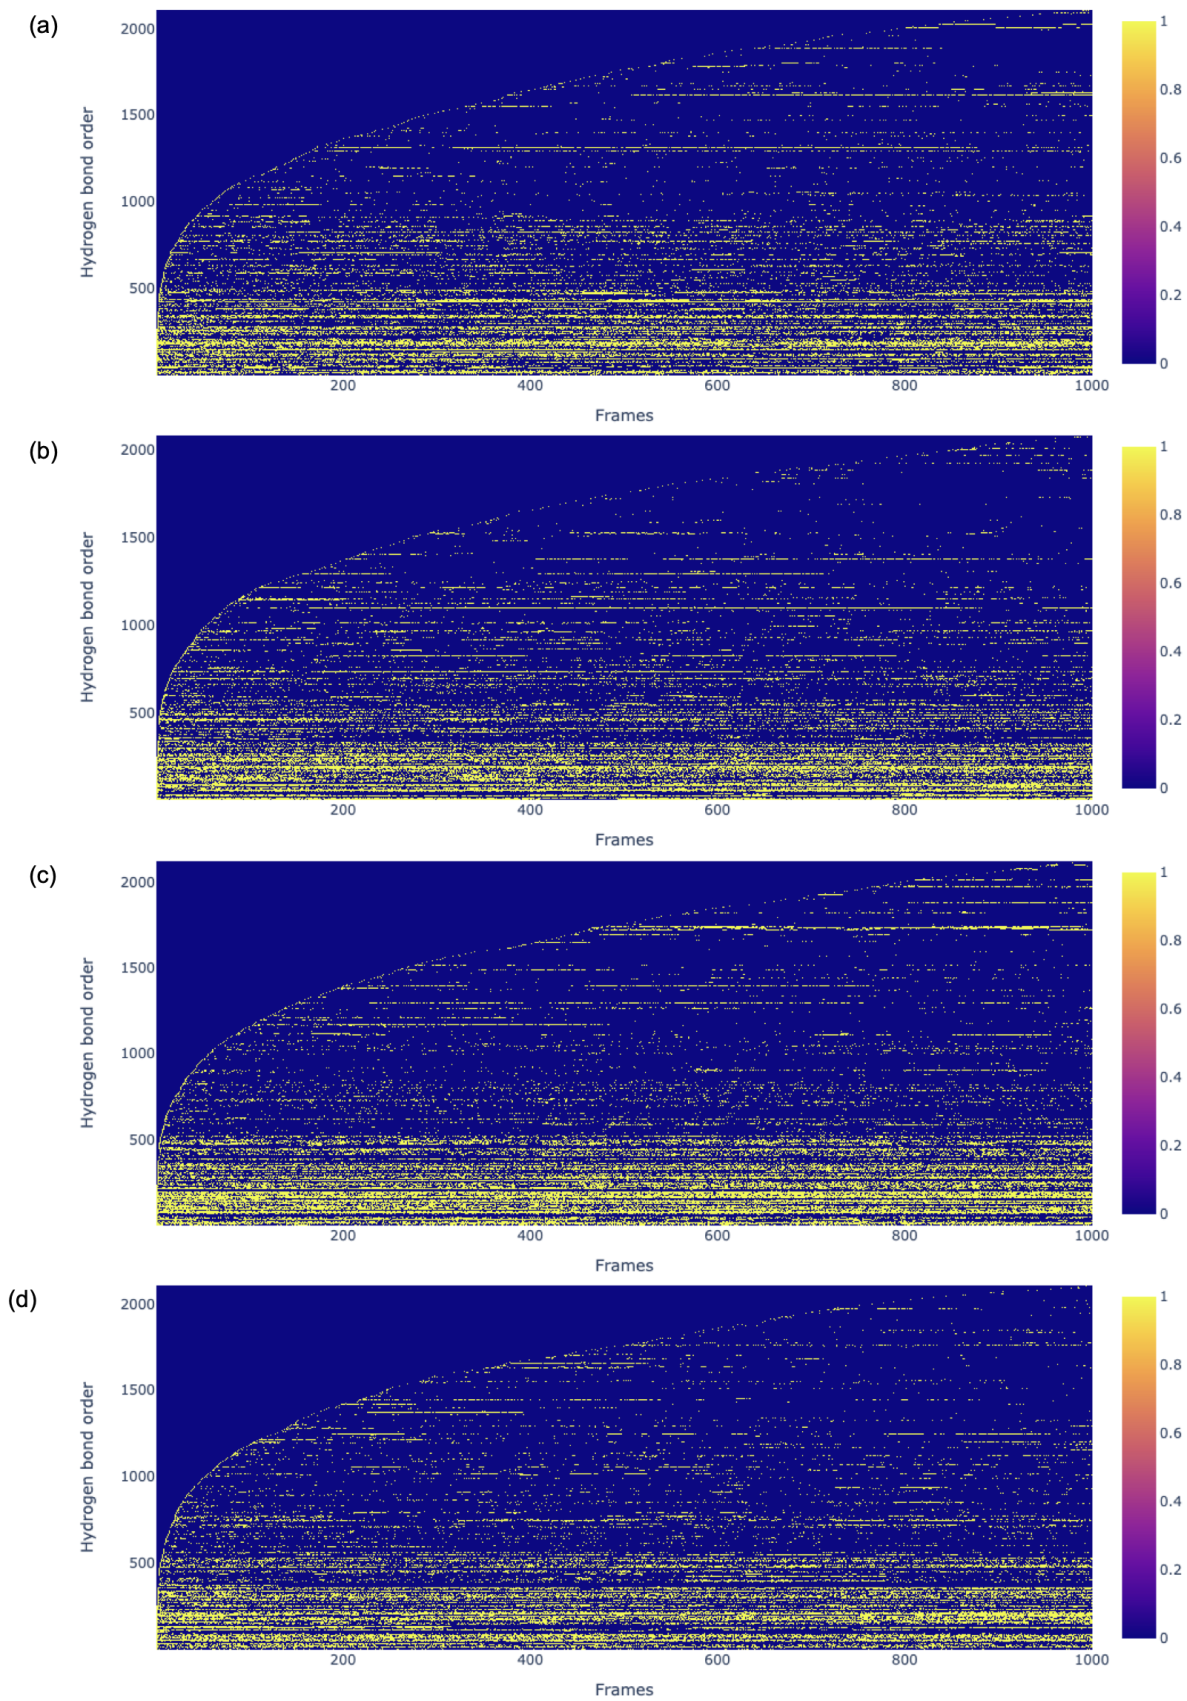

**Figure S10.** Hydrogen bonds and their lifetime during the MD simulations. Yellow and blue mean appear and disappear. The list of hydrogen bonds are presented at the end of this SI.

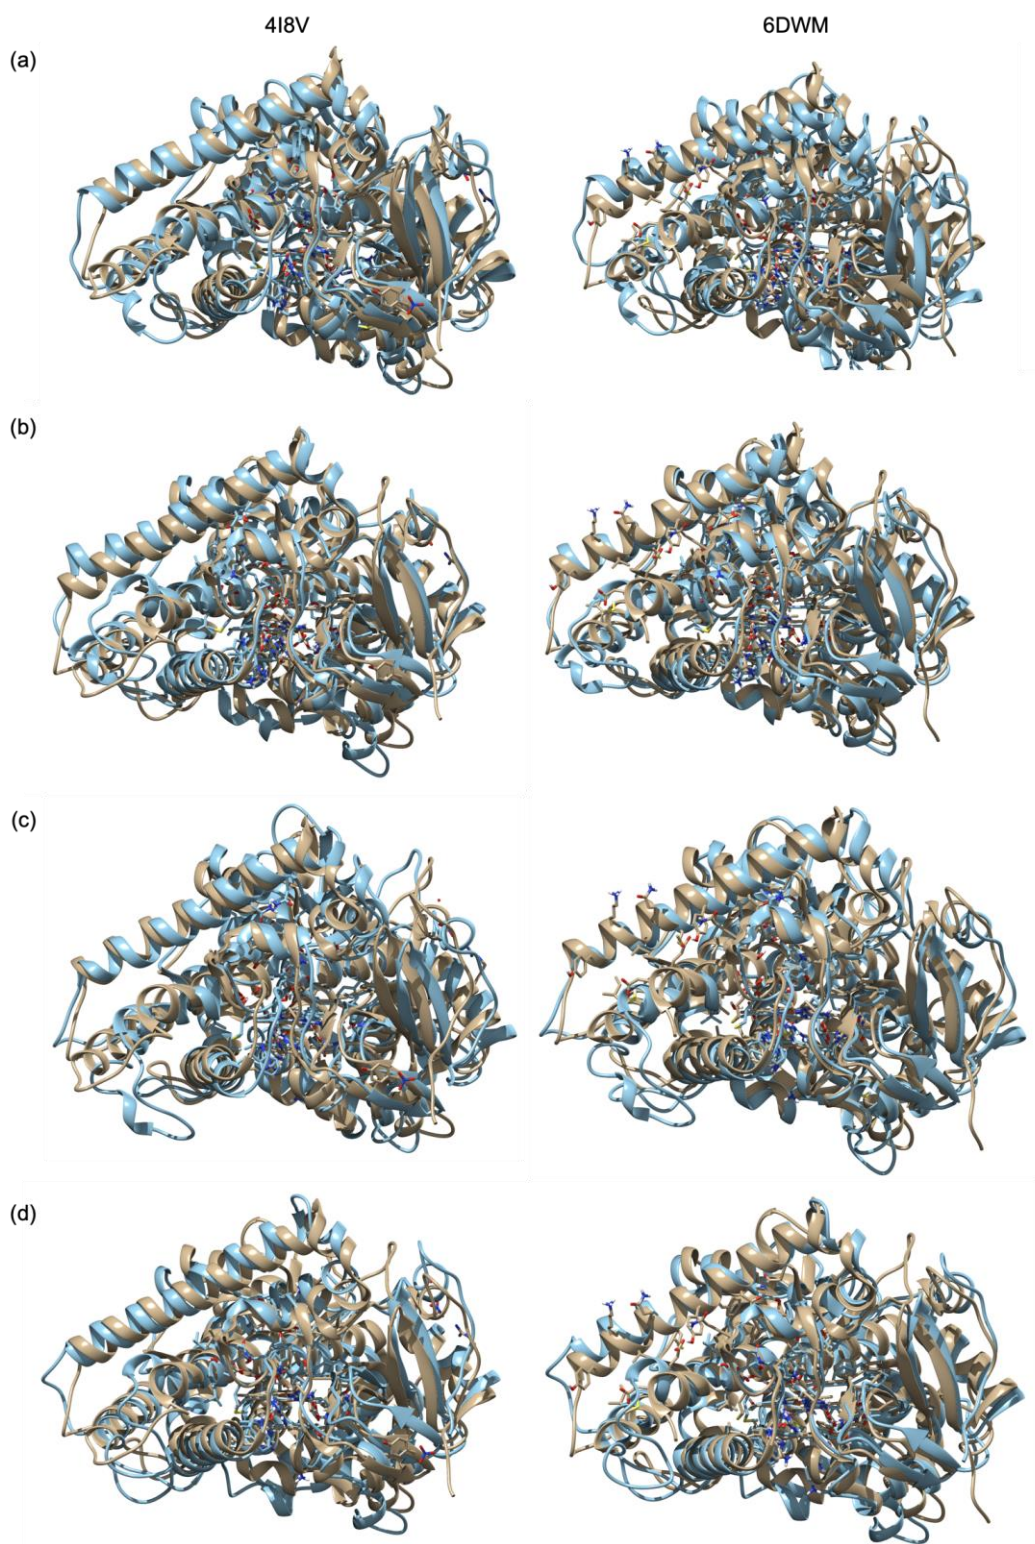

**Figure S11.** Overlay of the pdb from 4 model calculatd by MD and the CYP1A1 pdbs of previous studies.



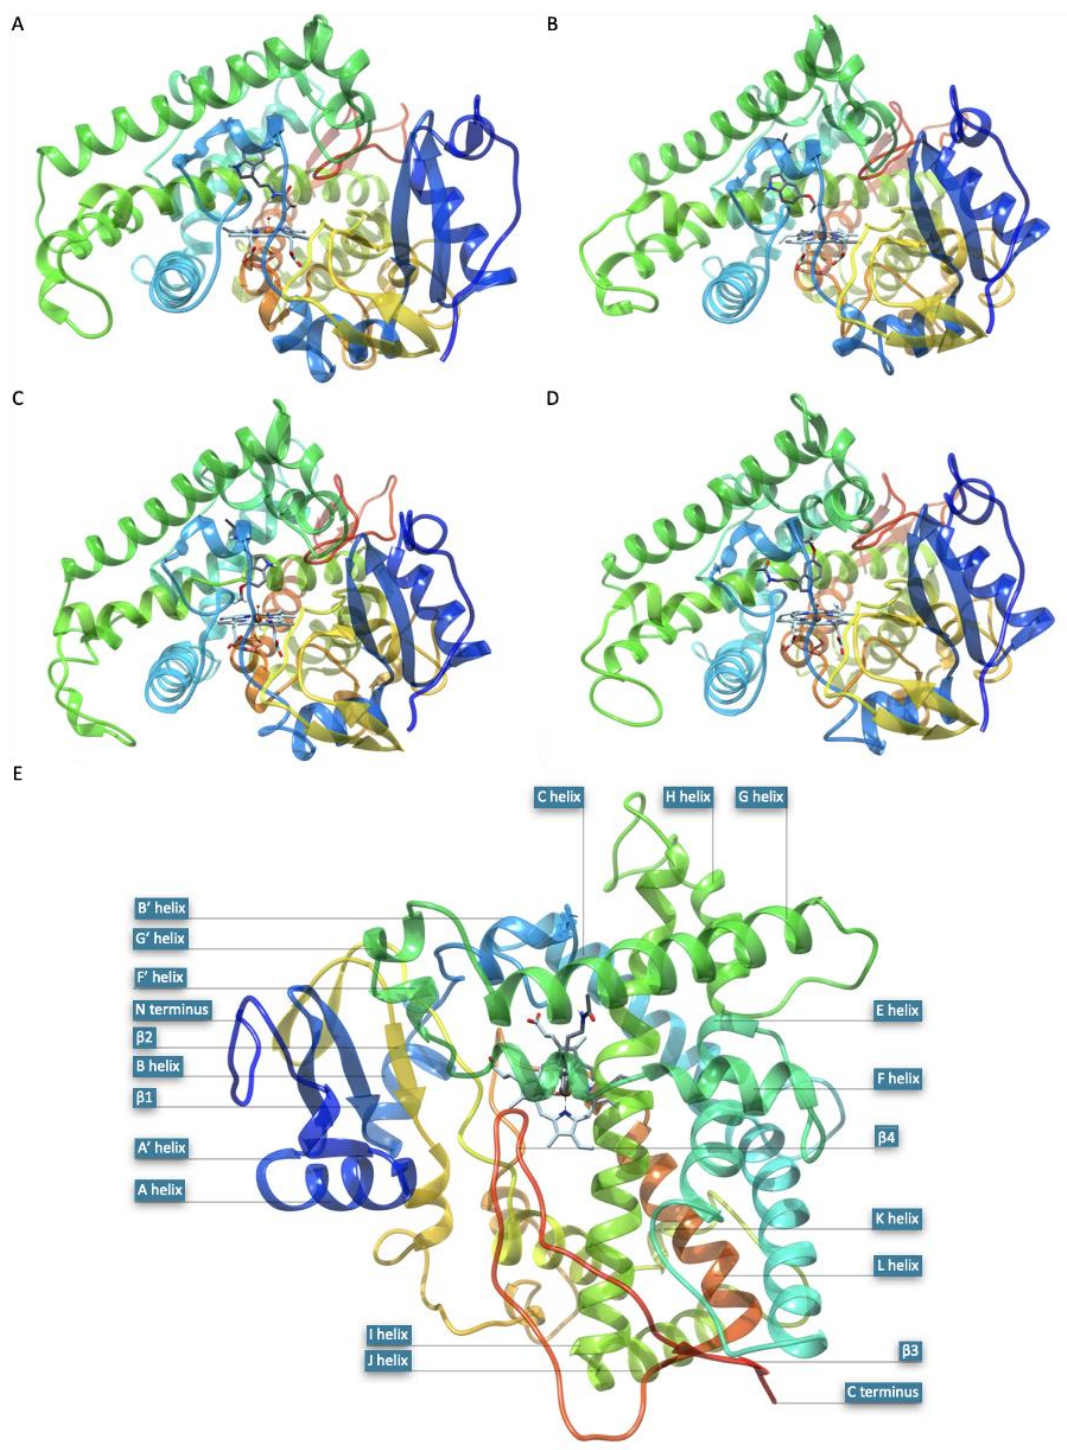

**Figure S10.** Overall structures of each model from the MD simulation: Model I (part A), Model II (part B), Model III (part C) and Model IV (part D). CYP1A1 coloured from blue at the N terminus to red at the V terminus with compound I as light blue and melatonin as grey sticks (A-D). Helix definitions (from Poulos, T. L. Heme Enzyme Structure and Function. *Chem. Rev.* **2014**, *114*, 3919-3962) of CYP1A1 are shown in part E.

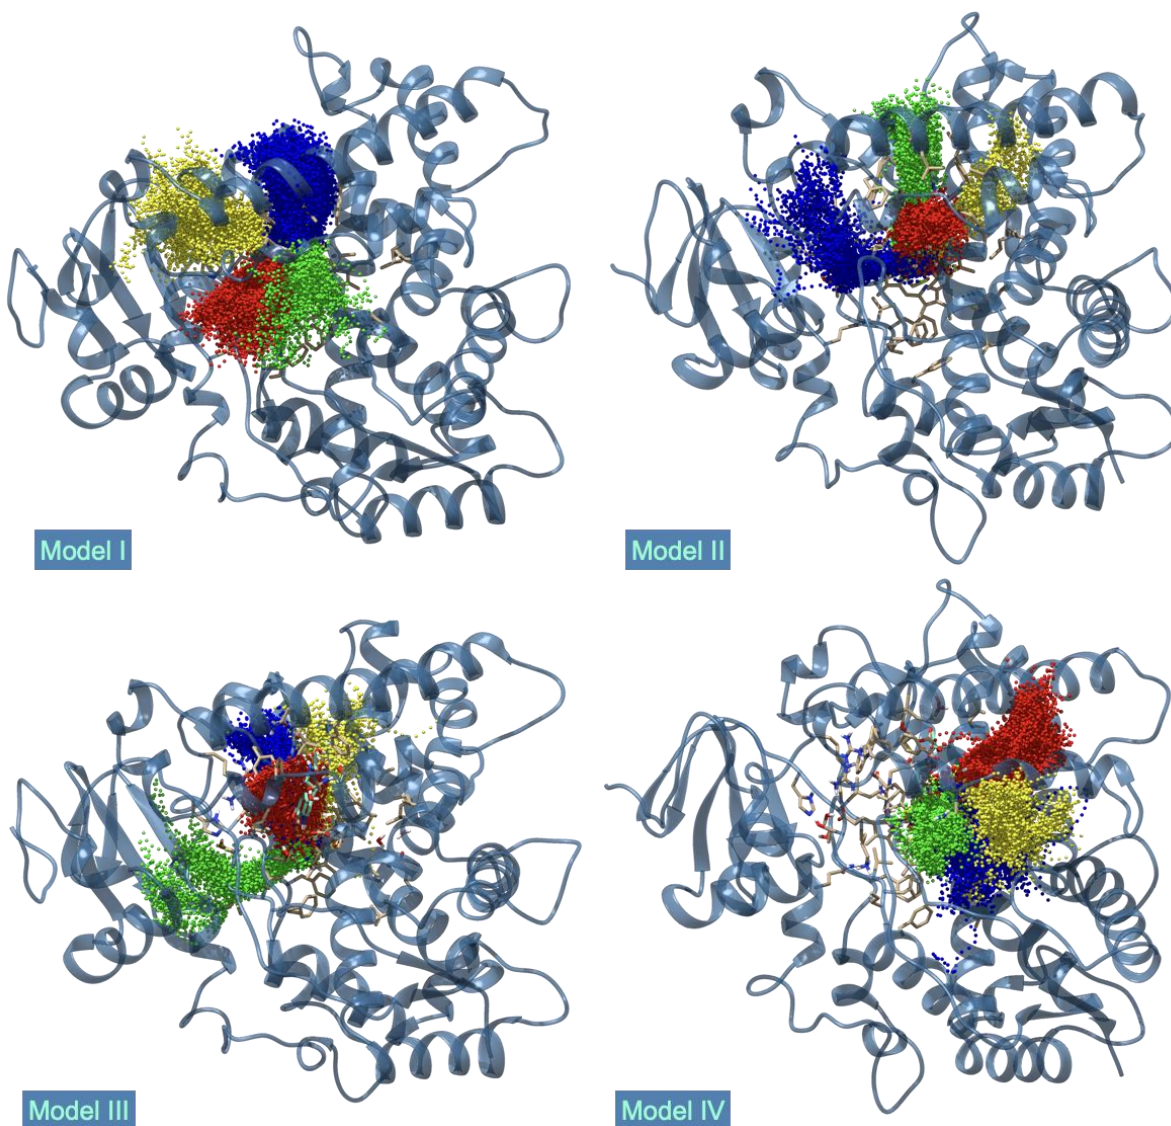

**Figure S11.** Tunneling analysis for the entrance and exit channels leading to CpdI as obtained from the individual snapshots from the MD simulations on CYP1A1 with melatonin with substrate starting orientation **I**, **II**, **III** and **IV** during a 100 ns. The top 4 channels are presented in red, blue, green and yellow for each of the models.

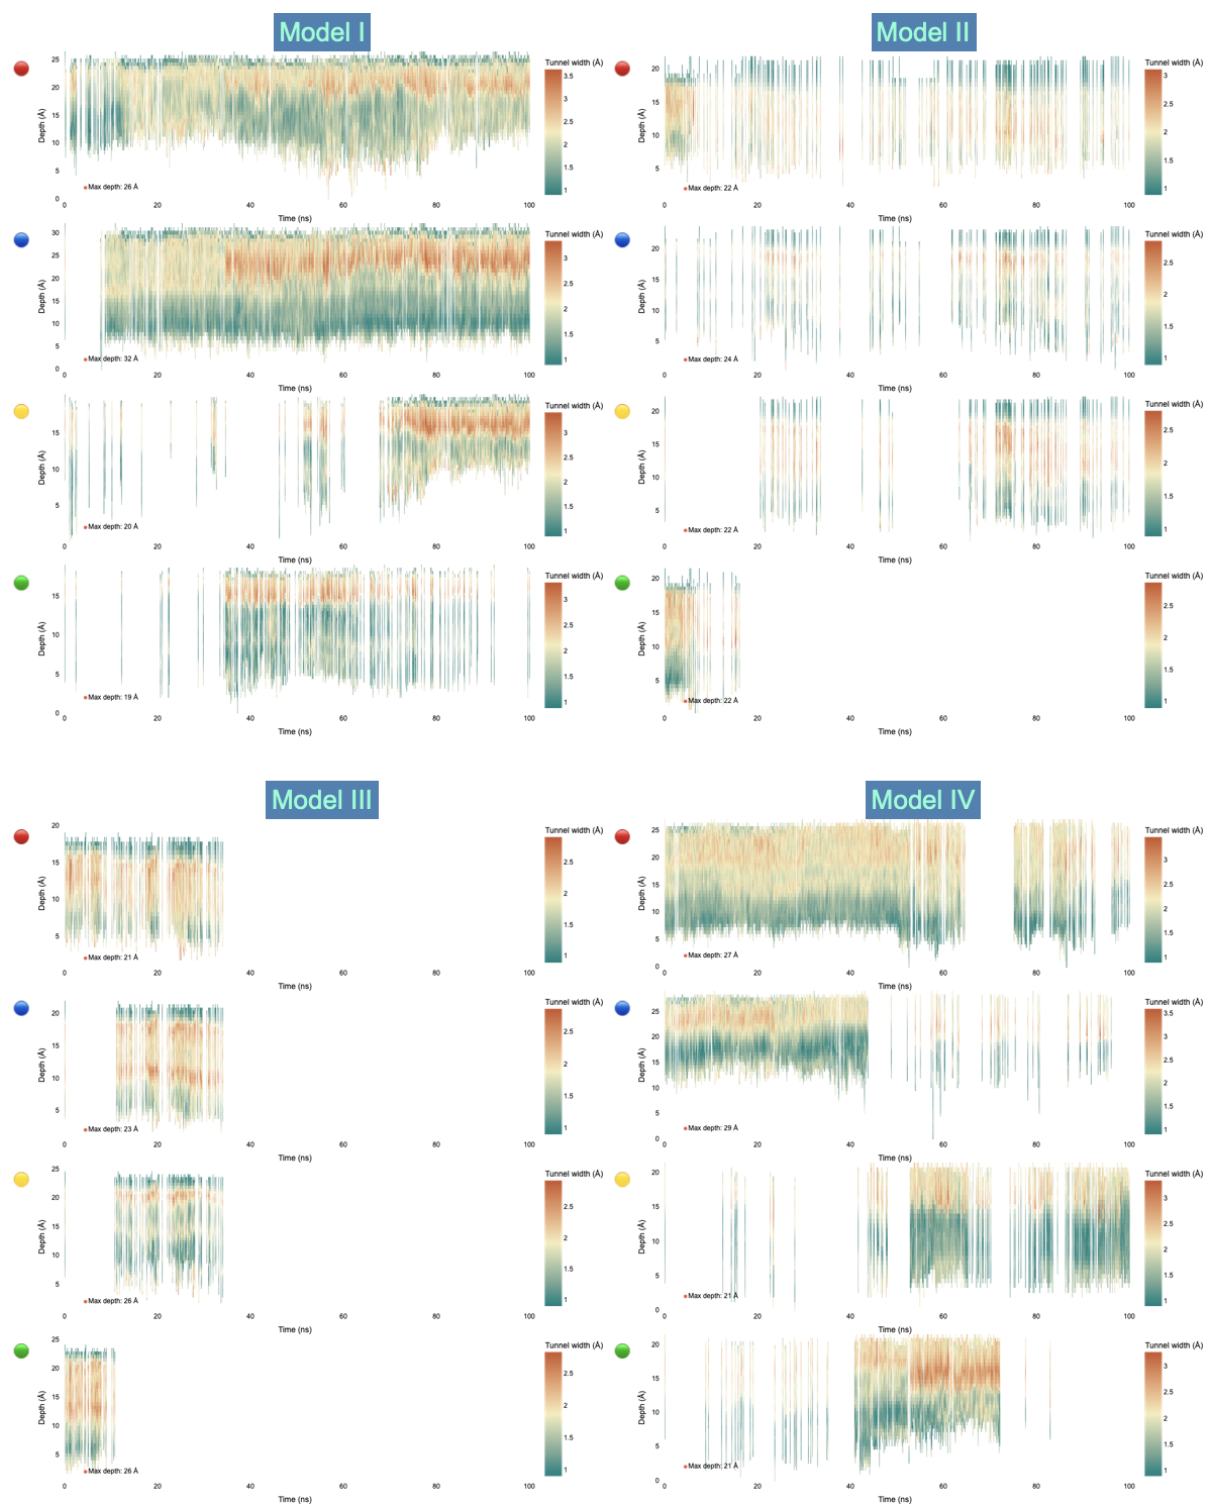

**Figure S12.** Tunneling analysis for the entrance and exit channels leading to Cpd1 as obtained from the individual snapshots from the MD simulations on CYP1A1 with melatonin with substrate starting orientation I, II, III and IV during a 100 ns. The details of top 4 channels from tunnel analysis for each model from the MD simulation are shown.

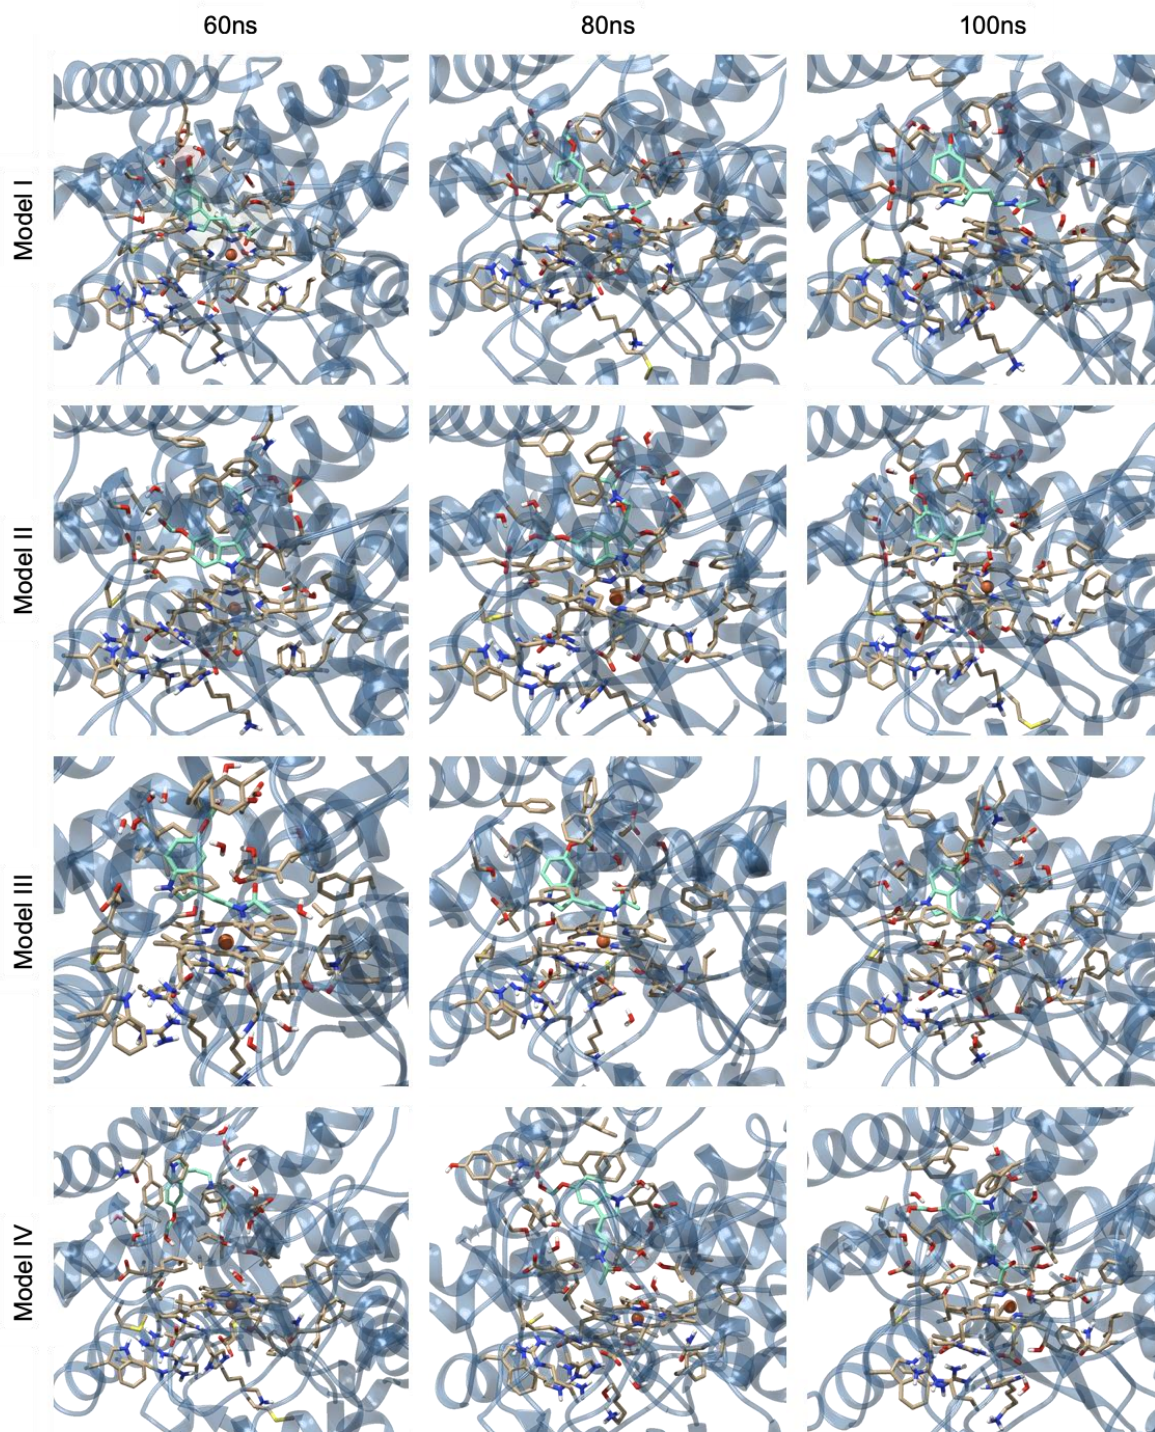

**Figure S13.** Selected binding poses of *O*-methoxy hydroxylated product versus heme as obtained from snapshots after 60, 80 or 100 ns from the MD simulations for CYP1A1 with melatonin with substrate starting orientation I, II, III and IV. Each MD was calculated from AutoDock Vina. The docking scores for each model were -10.1, -7.5, -9.0 and -5.2.

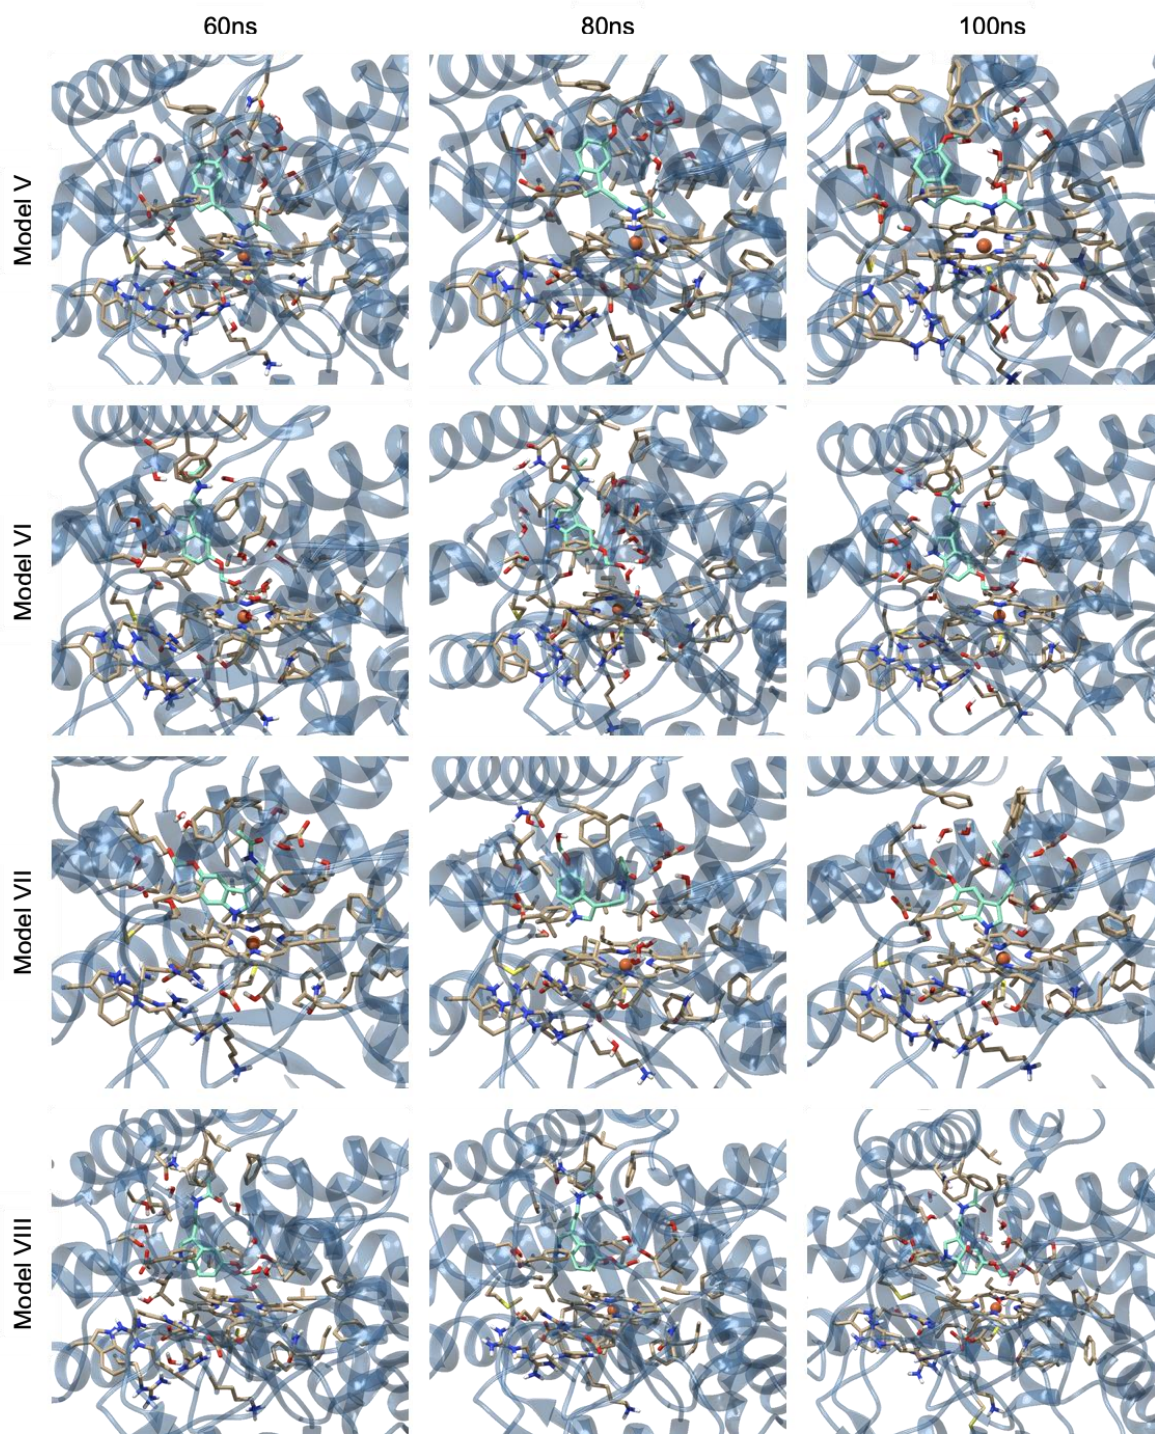

**Figure S14.** Selected binding poses of O-methoxy hydroxylated product versus heme as obtained from snapshots after 60, 80 or 100 ns from the MD simulations for CYP1A1 with melatonin with substrate starting orientation **V**, **VI**, **VII** and **VIII**. Each MD was calculated from AutoDock Vina. The docking scores for each model were -6.7, -8.8, -6.8 and -9.0.

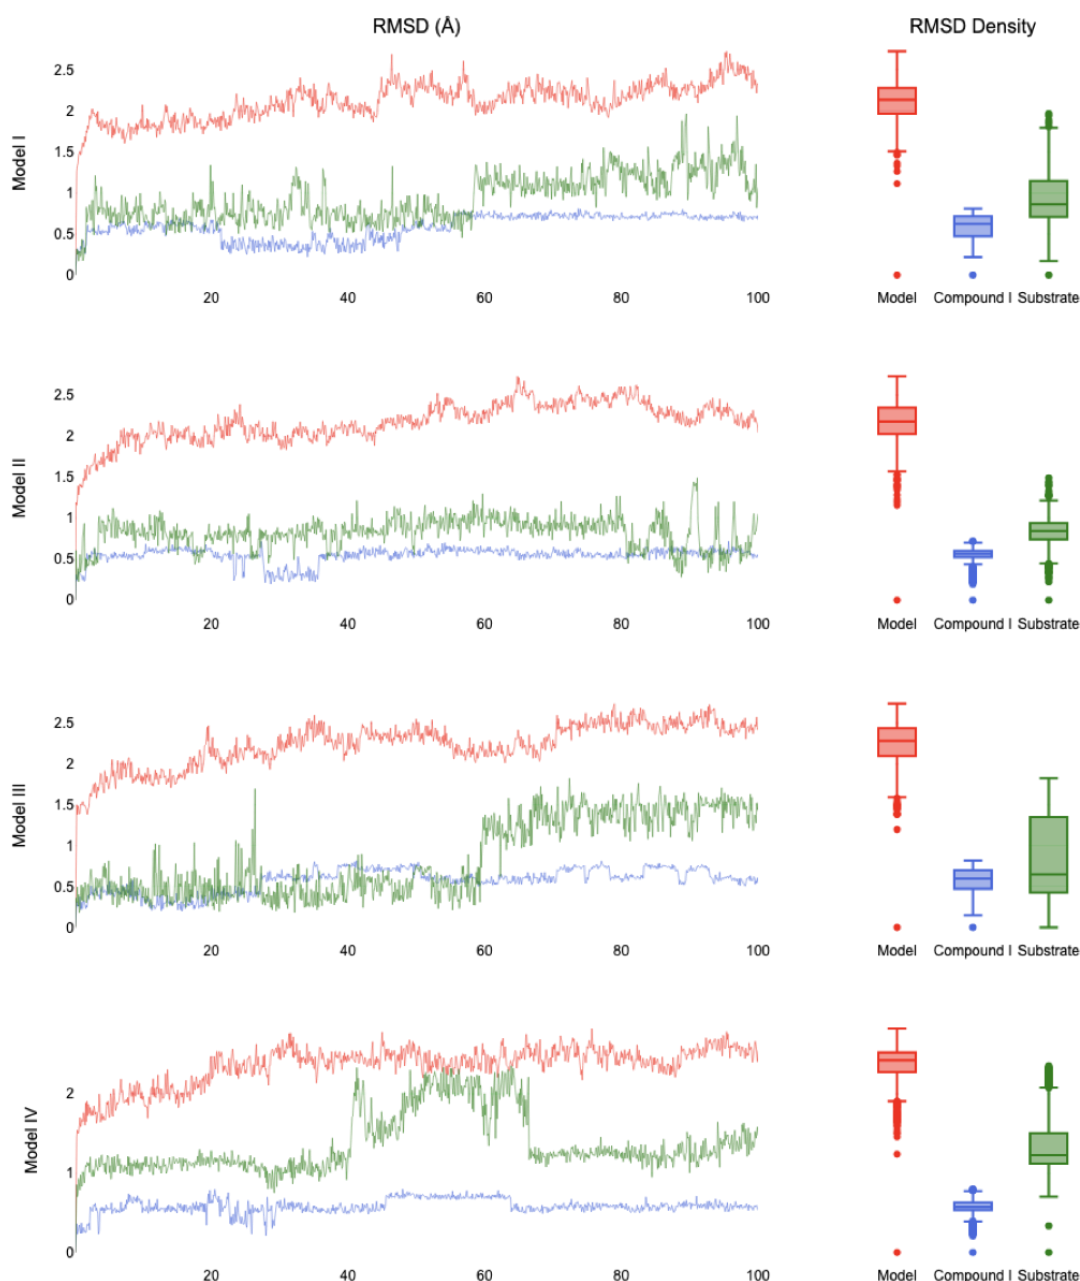

**Figure S15.** RMSD plots obtained from the MD simulations for O-methoxy hydroxylated product versus heme starting orientation I, II, III and IV during a 100 ns MD calculation. The right-hand-side shows the individual RMSD values of the whole model (in red), Compound I only (in blue) and substrate only (in green).

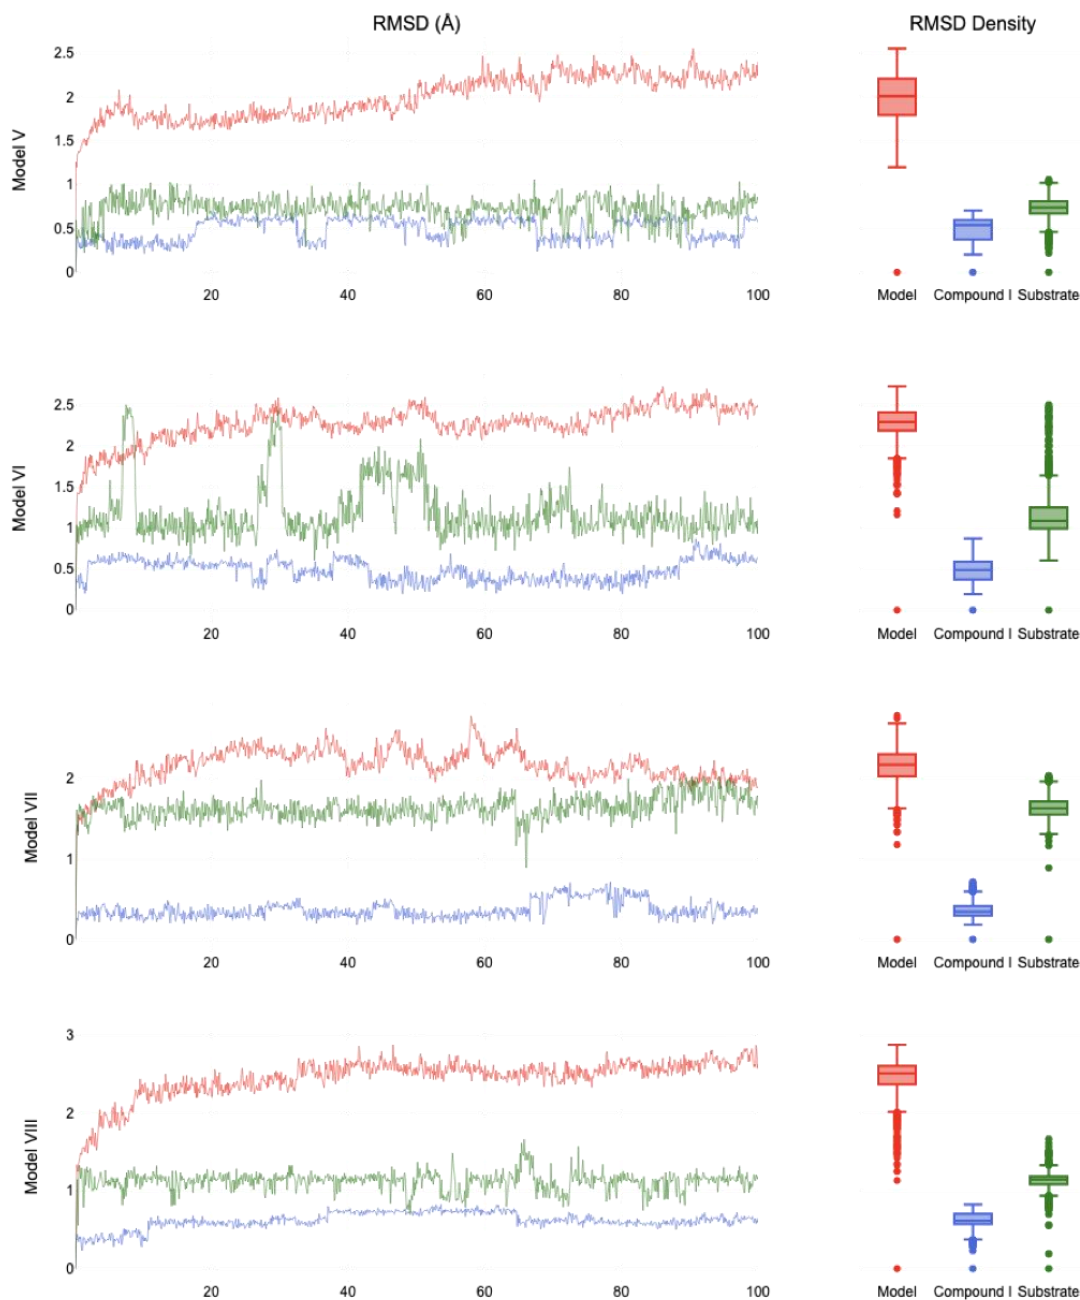

**Figure S16.** RMSD plots obtained from the MD simulations for *O*-methoxy hydroxylated product versus heme starting orientation **V**, **VI**, **VII** and **VIII** during a 100 ns MD calculation. The right-hand-side shows the individual RMSD values of the whole model (in red), Compound I only (in blue) and substrate only (in green).

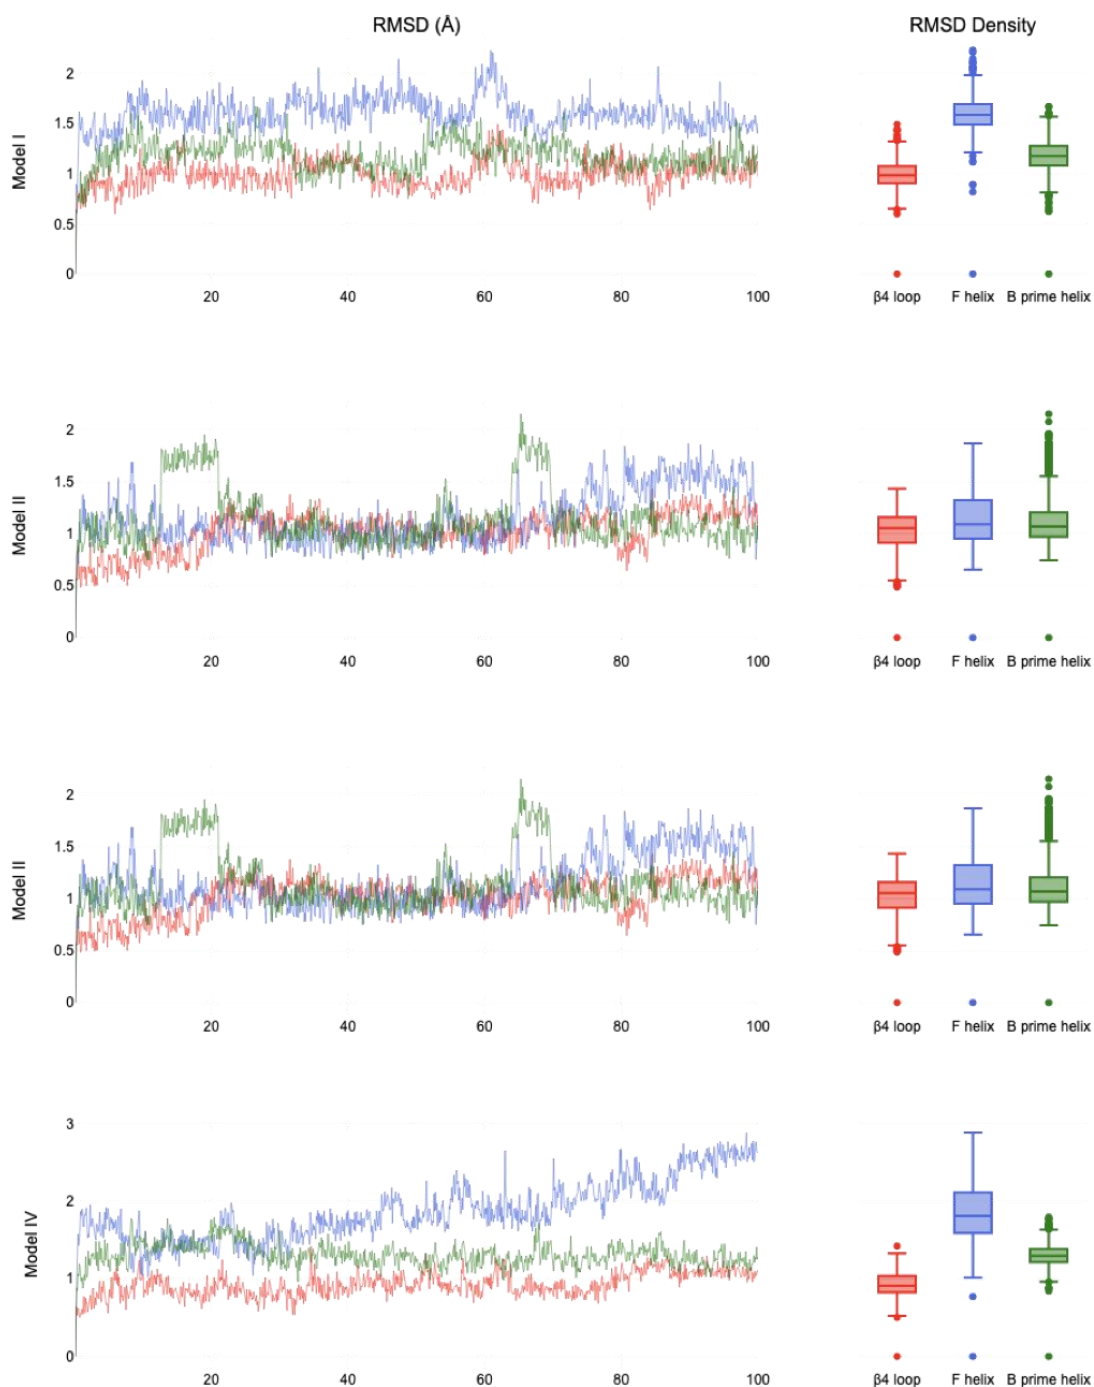

**Figure S17.** RMSD plots obtained from the MD simulations for *O*-methoxy hydroxylated product versus heme starting orientation **I**, **II**, **III** and **IV** for a 100 ns MD calculation focusing on the change of the protein helices. The right-hand-side shows the individual RMSD values of the  $\beta 4$  loop (in red), the F-helix (in blue) and the B' helix (in green).



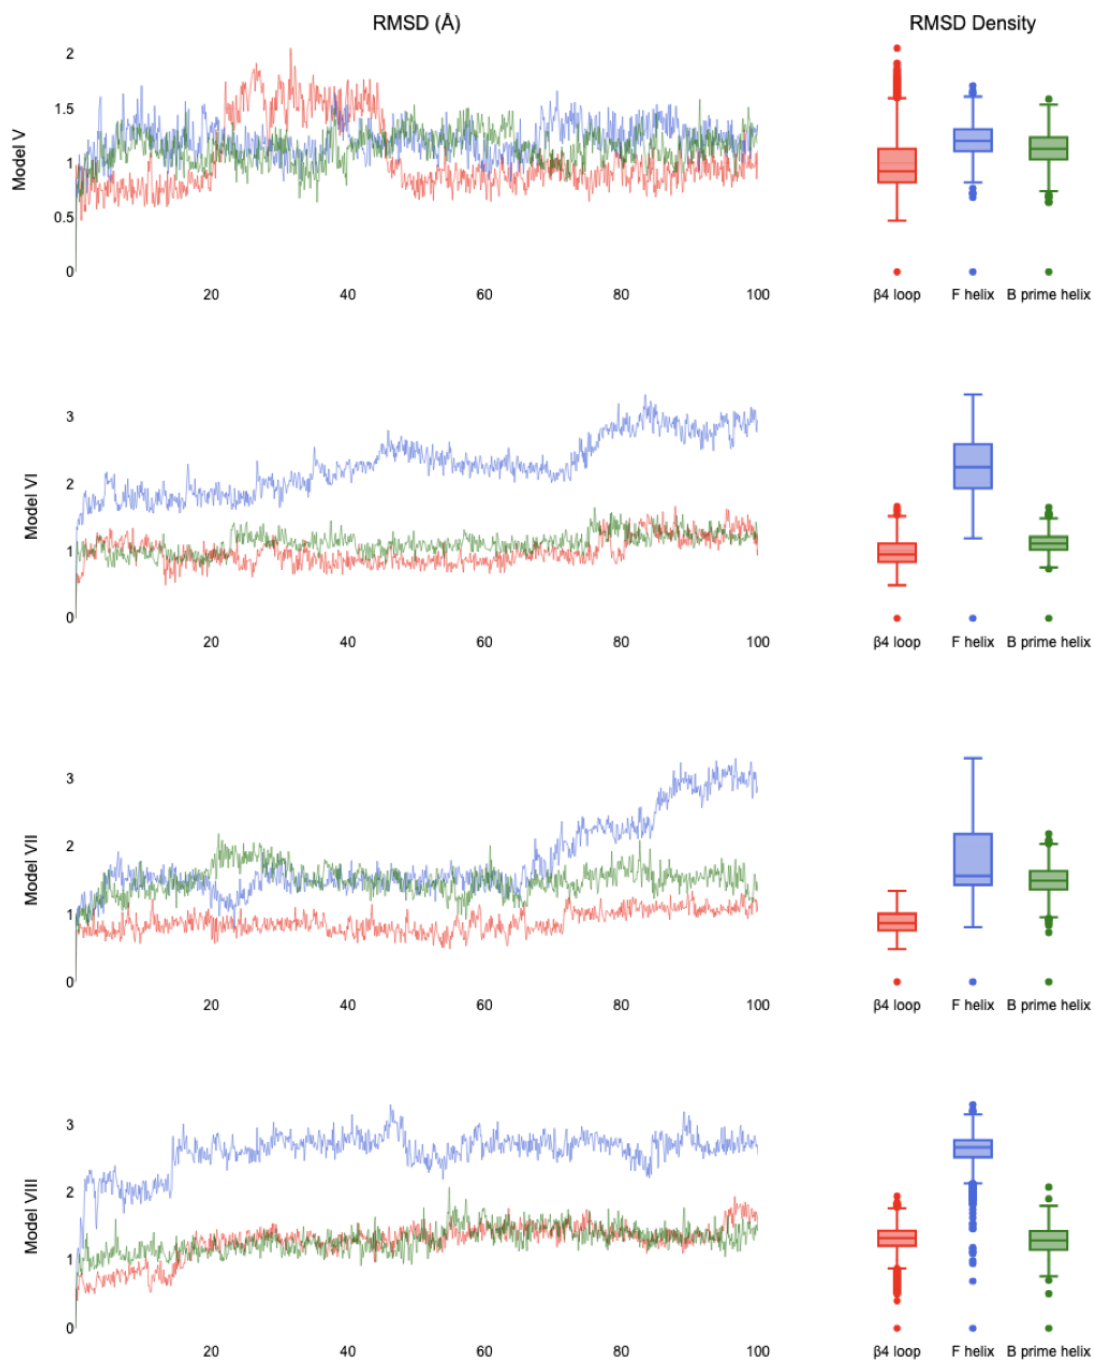

**Figure S18.** RMSD plots obtained from the MD simulations for *O*-methoxy hydroxylated product versus heme starting orientation **V**, **VI**, **VII** and **VIII** for a 100 ns MD calculation focusing on the change of the protein helices. The right-hand-side shows the individual RMSD values of the  $\beta 4$  loop (in red), the F-helix (in blue) and the B' helix (in green).

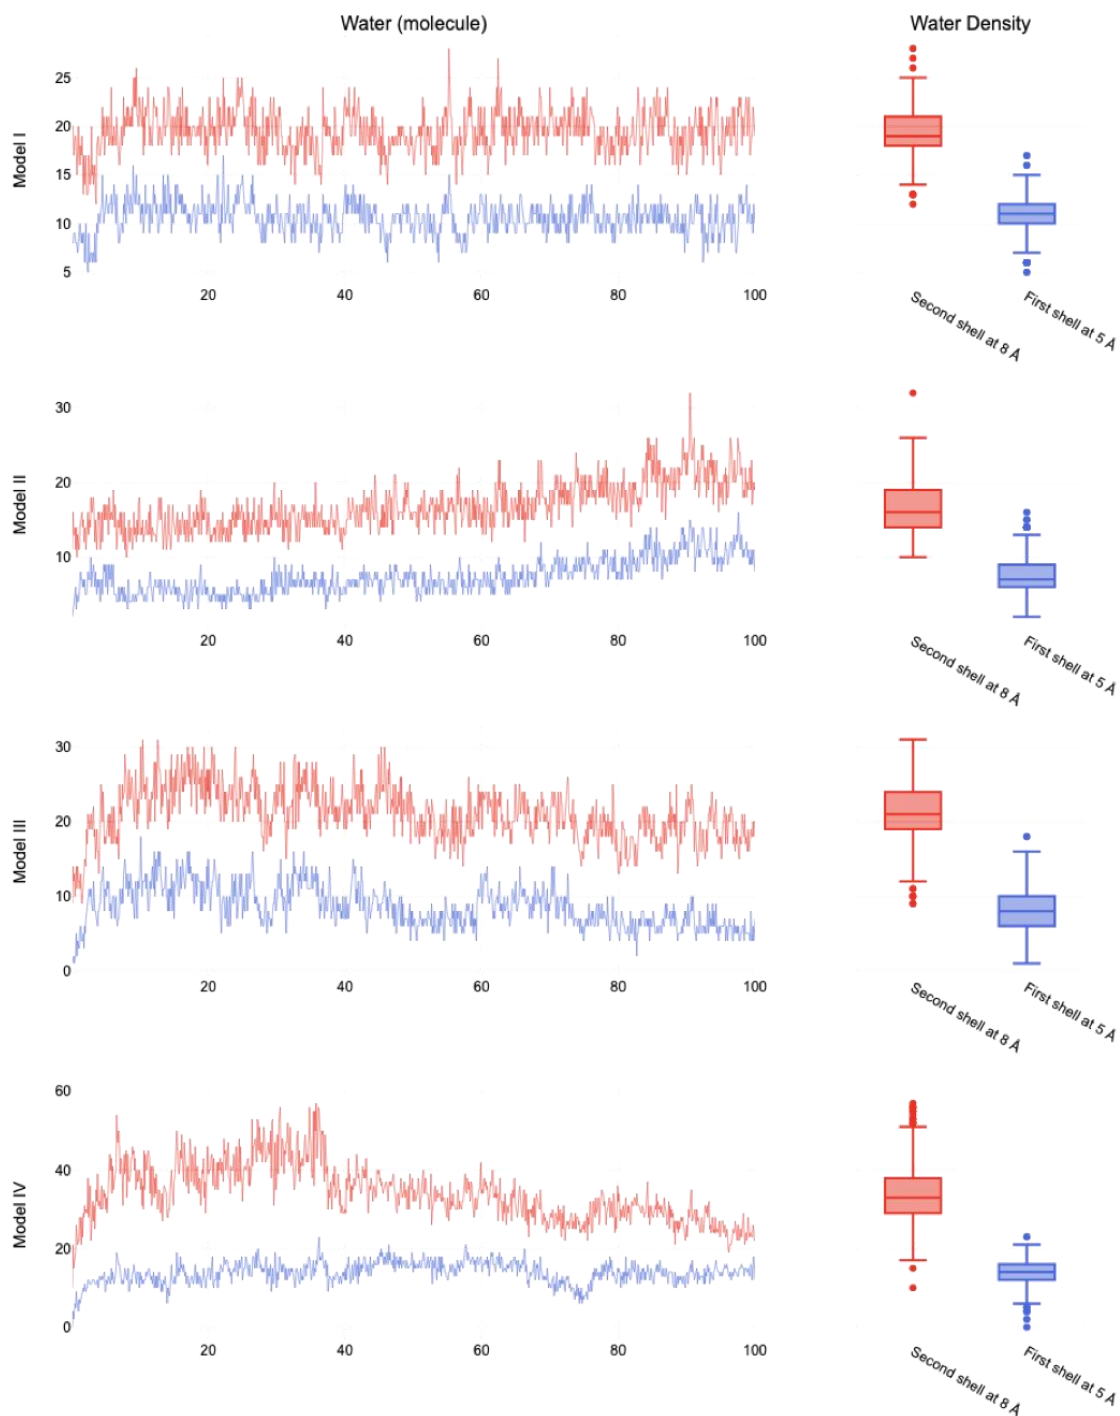

**Figure S19.** Protein solvation analysis obtained from the MD simulations for O-methoxy hydroxylated product versus heme starting orientation I, II, III and IV during a 100 ns MD calculation focusing on the change of the protein helices. The right-hand-side counts the number of water molecules within a radius of Cpdl of 5 Å (in blue) and within 8 Å (in red).

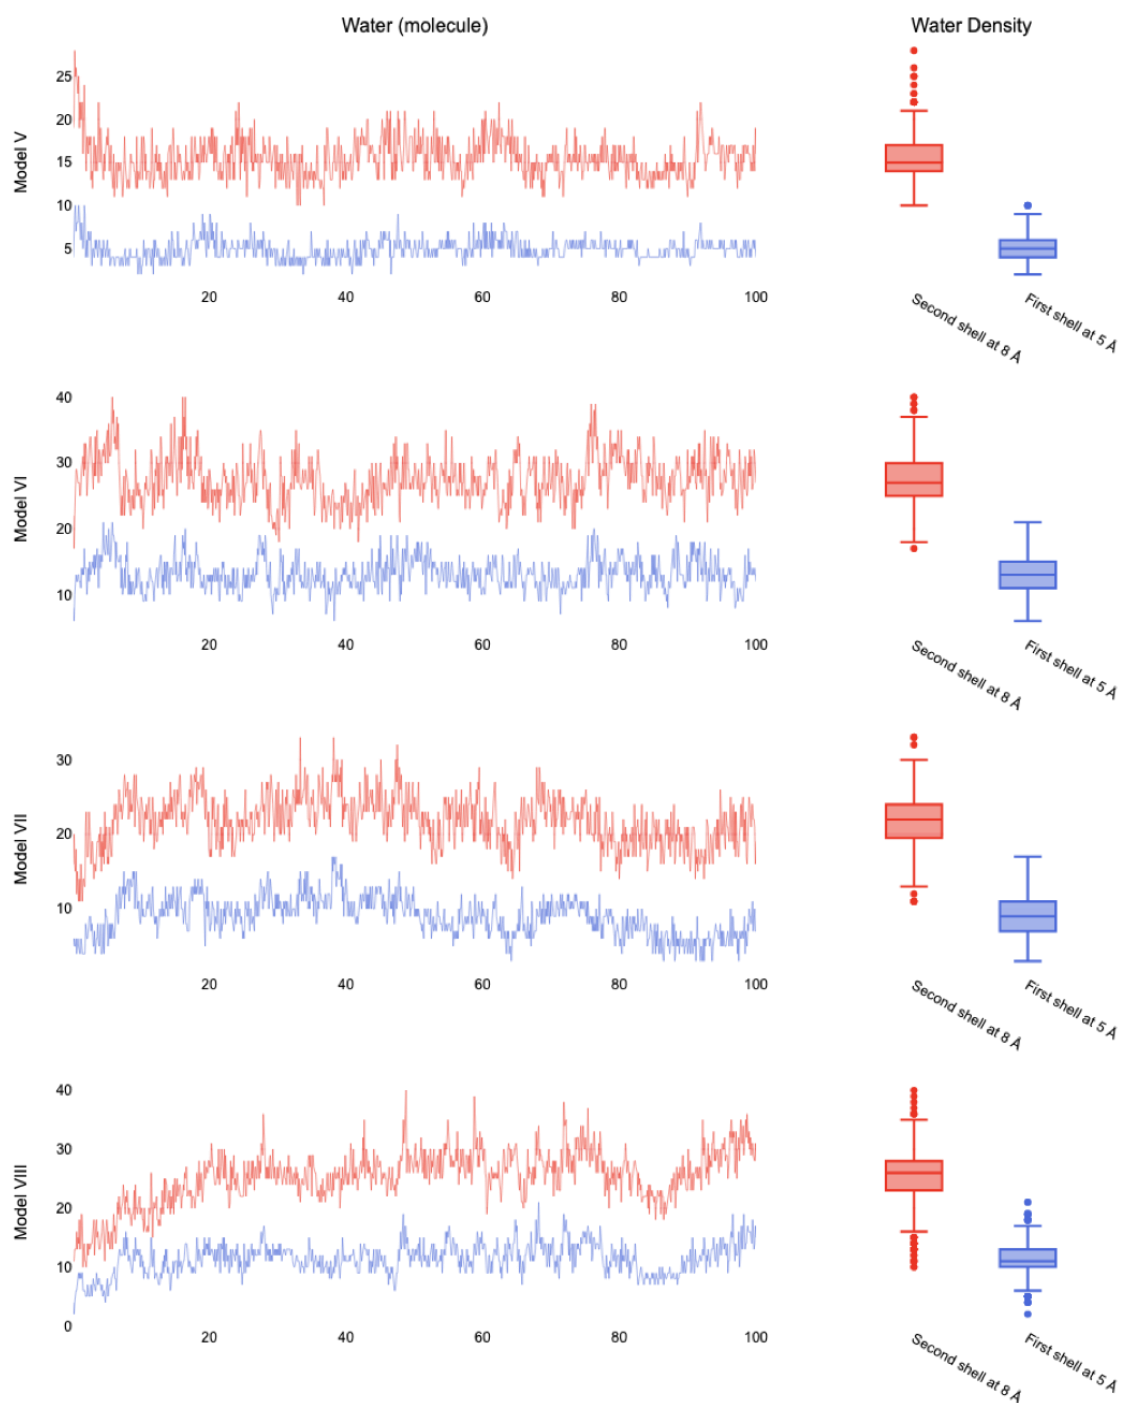

**Figure S20.** Protein solvation analysis obtained from the MD simulations for O-methoxy hydroxylated product versus heme starting orientation **V**, **VI**, **VII** and **VIII** during a 100 ns MD calculation focusing on the change of the protein helices. The right-hand-side counts the number of water molecules within a radius of Cpdl of 5 Å (in blue) and within 8 Å (in red).

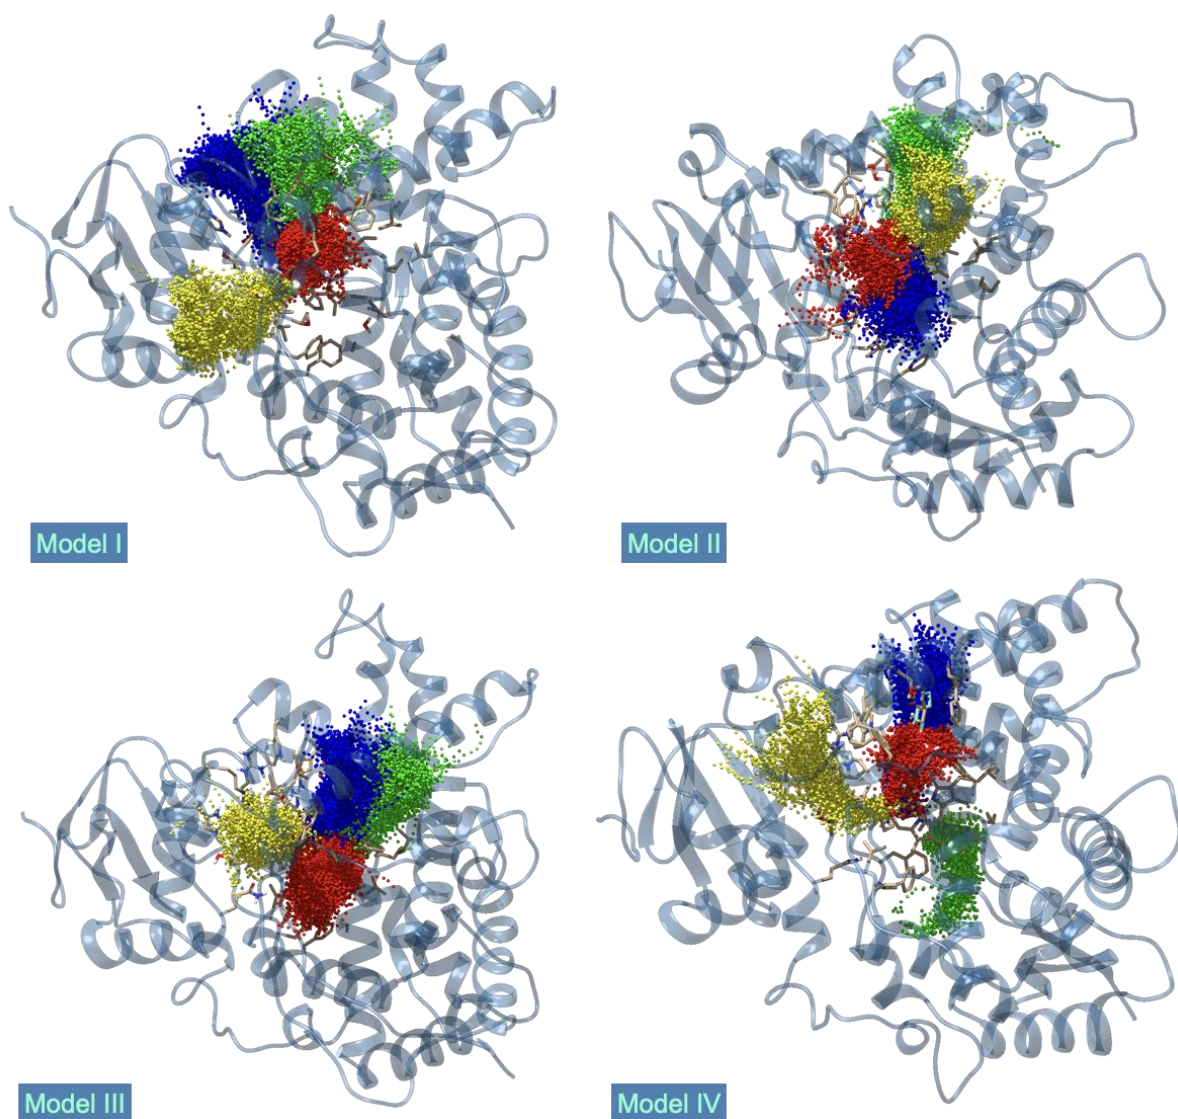

**Figure S21.** Tunneling analysis for the entrance and exit channels leading to heme as obtained from the individual snapshots from the MD simulations on CYP1A1 O-methoxy hydroxylated product versus heme starting orientation I, II, III and IV during a 100 ns. The top 4 channels are presented in red, blue, green and yellow for each of the models.

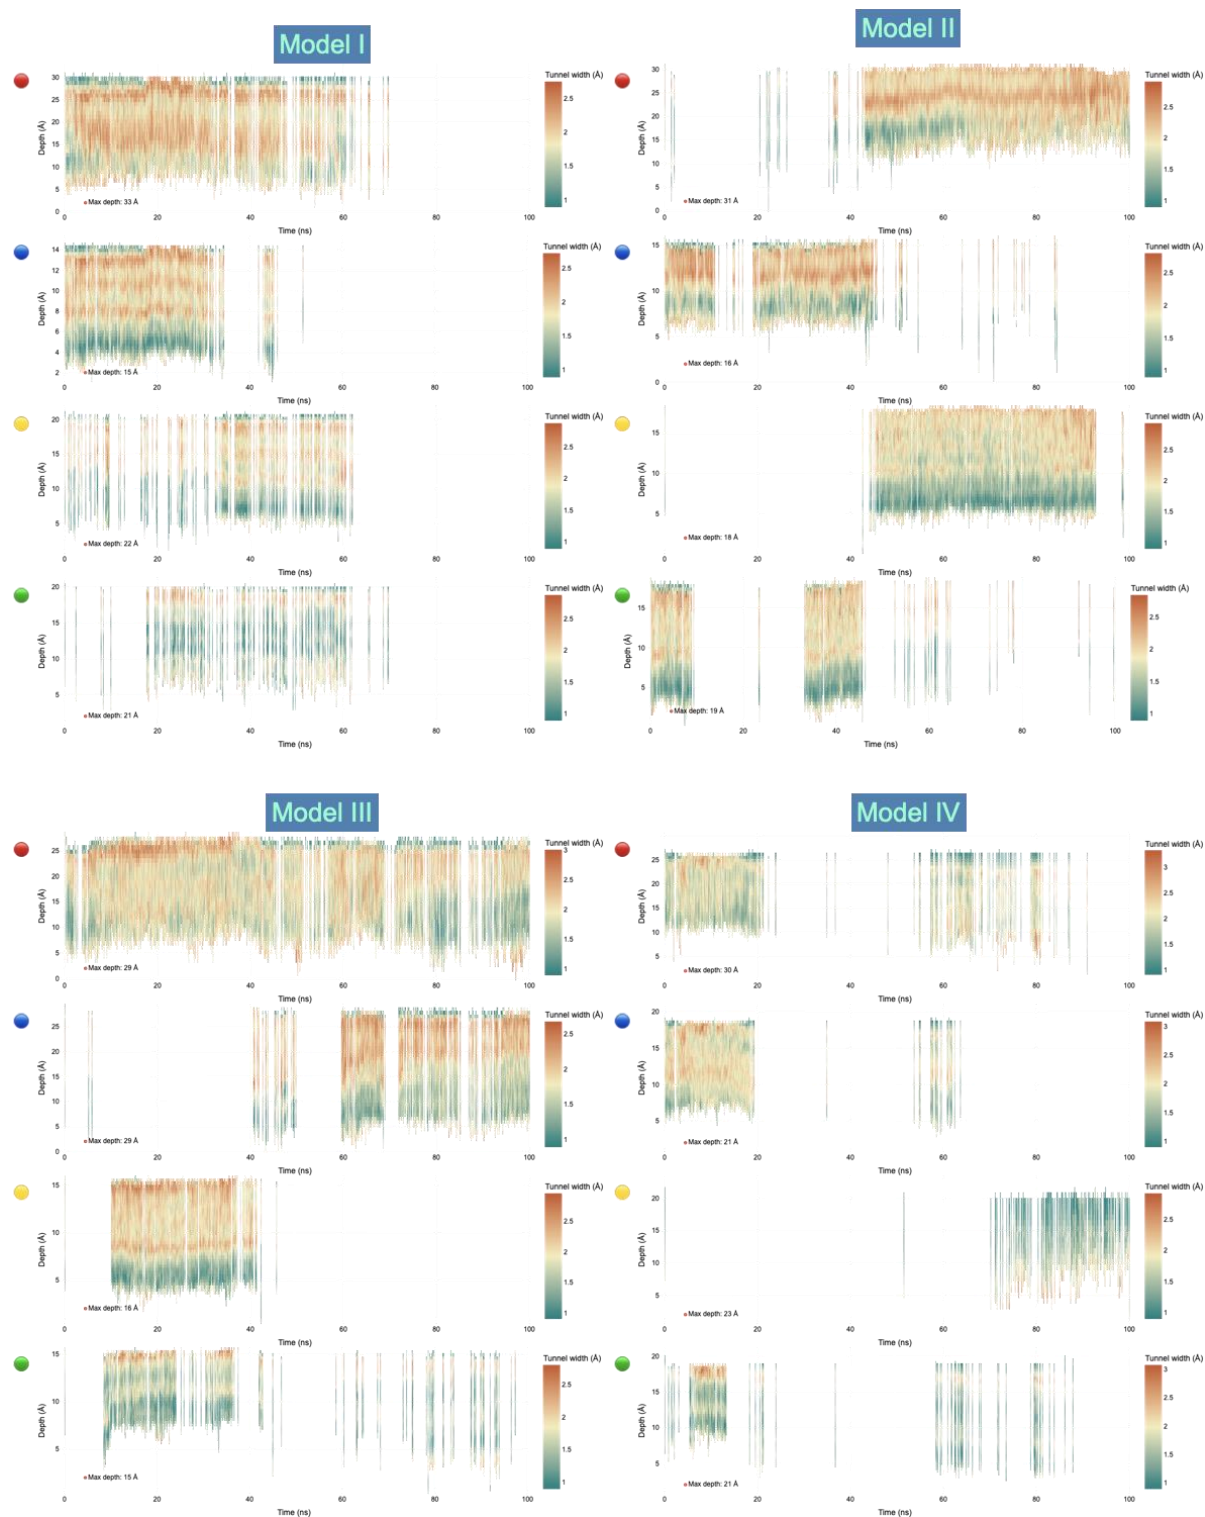

**Figure S22.** Tunneling analysis for the entrance and exit channels leading to heme as obtained from the individual snapshots from the MD simulations on CYP1A1 O-methoxy hydroxylated product versus heme starting orientation I, II, III and IV during a 100 ns. The details of top 4 channels from tunnel analysis for each model from the MD simulation are shown.

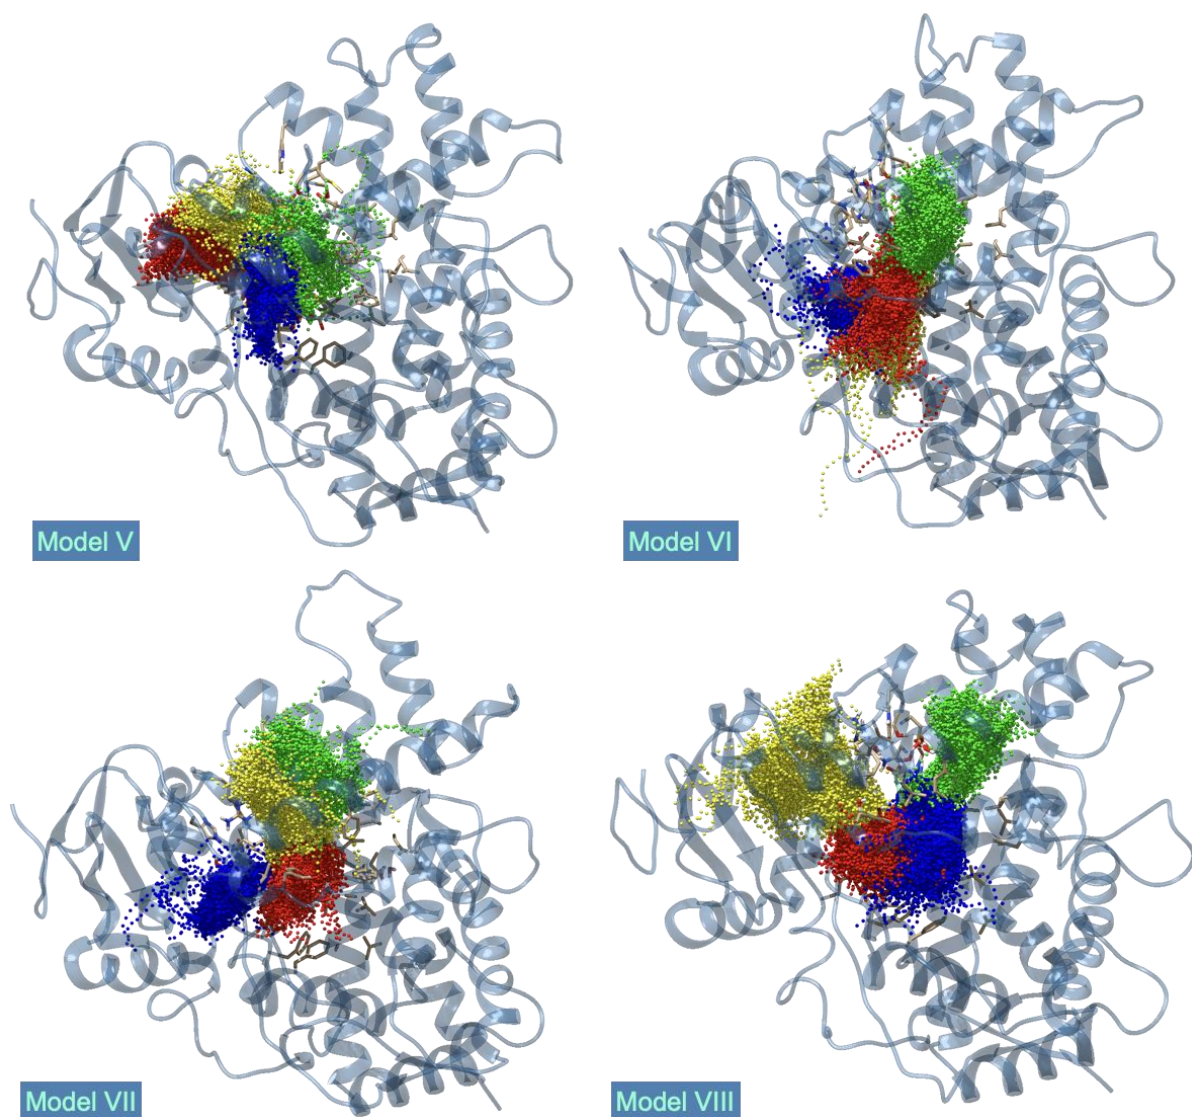

**Figure S23.** Tunneling analysis for the entrance and exit channels leading to heme as obtained from the individual snapshots from the MD simulations on CYP1A1 *O*-methoxy hydroxylated product versus heme starting orientation **V**, **VI**, **VII** and **VIII** during a 100 ns. The top 4 channels are presented in red, blue, green and yellow for each of the models.

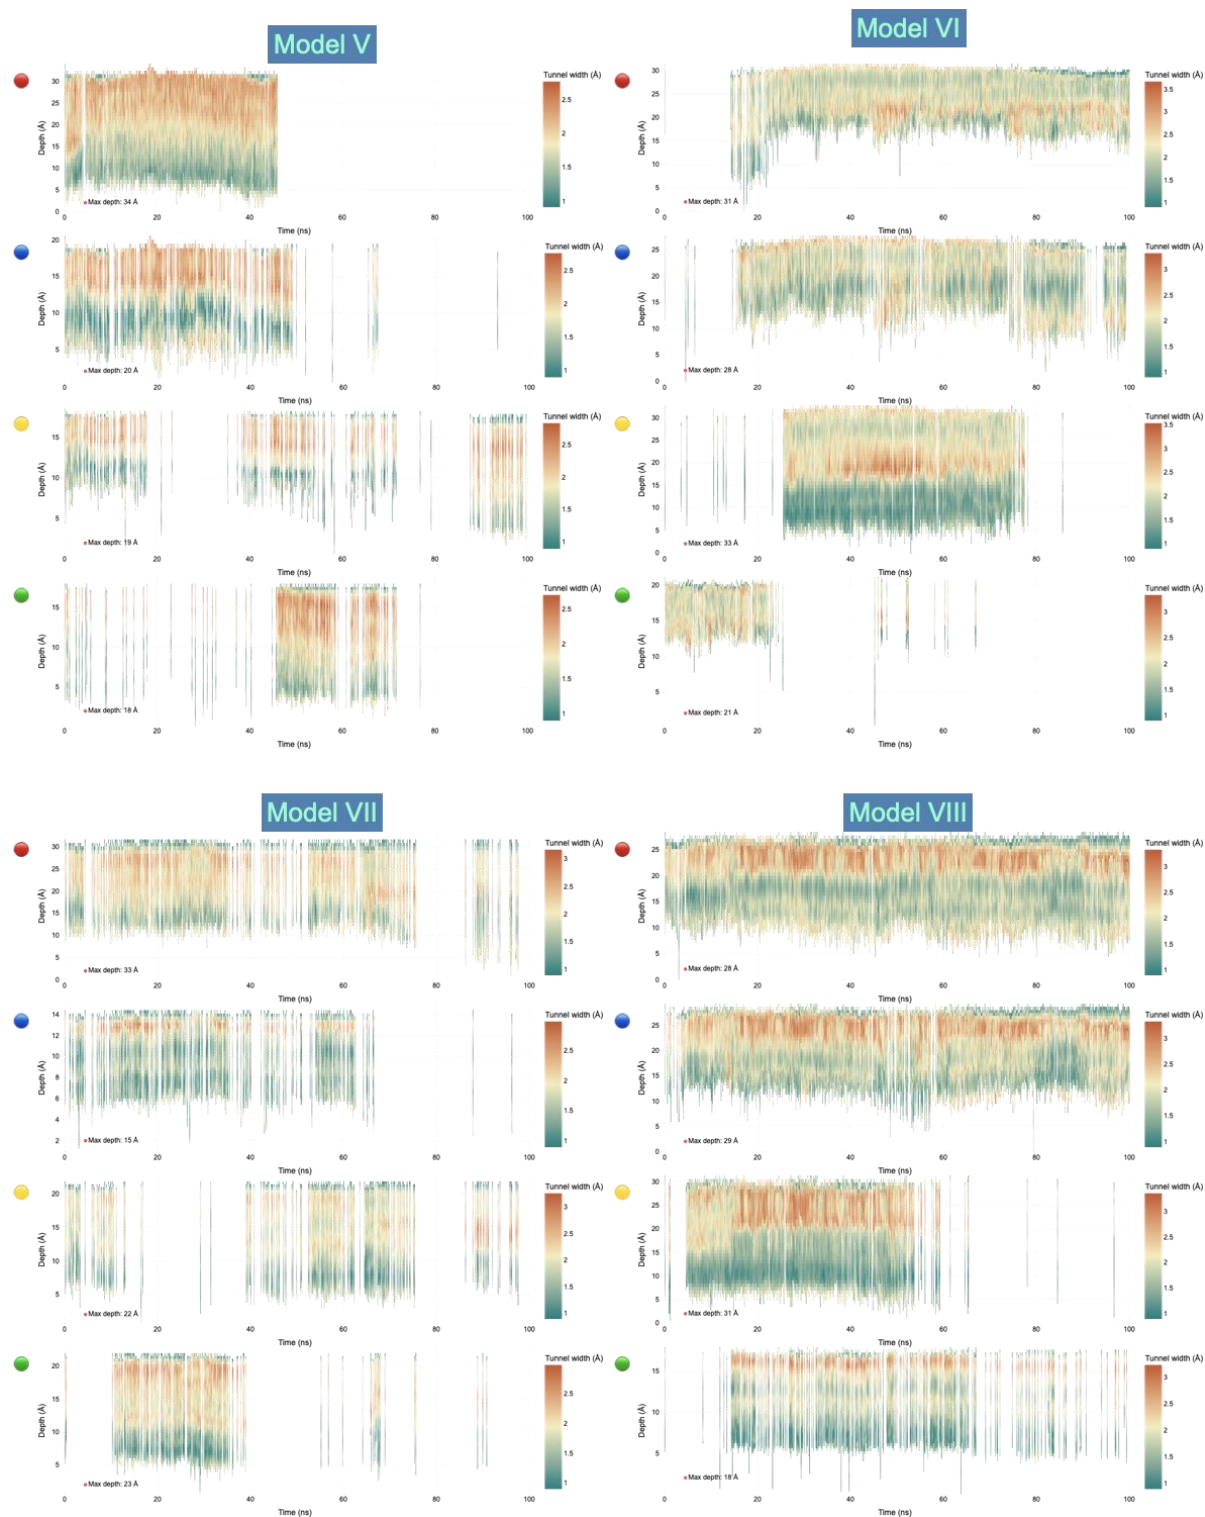

**Figure S24.** Tunneling analysis for the entrance and exit channels leading to heme as obtained from the individual snapshots from the MD simulations on CYP1A1 O-methoxy hydroxylated product versus heme starting orientation **V**, **VI**, **VII** and **VIII** during a 100 ns. The details of top 4 channels from tunnel analysis for each model from the MD simulation are shown.

## QM model set-up

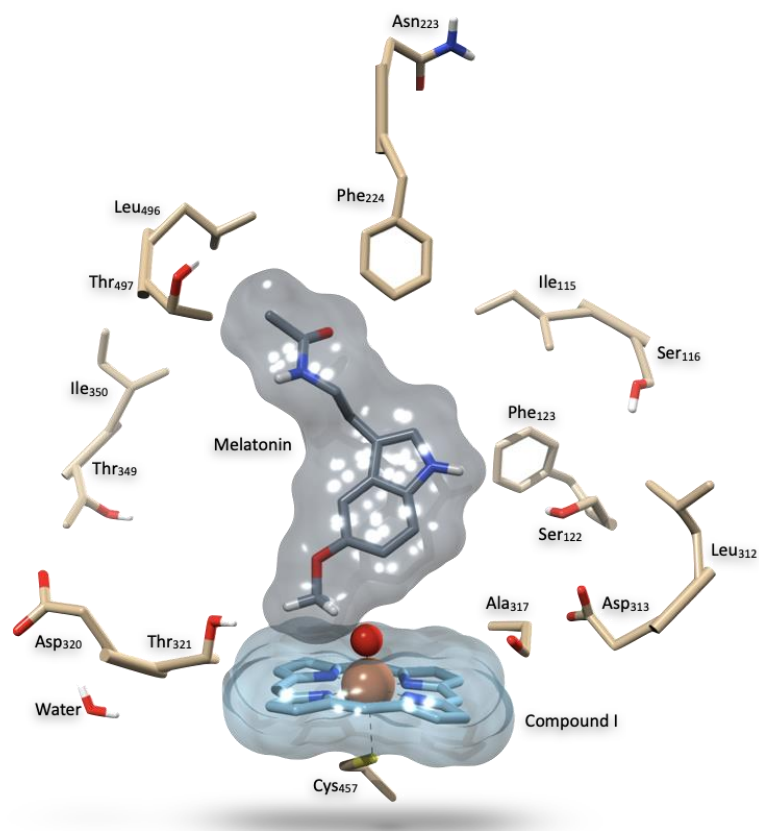

**Figure S25.** Cluster model  ${}^4\text{Re}_{\text{AIII}}$  of CYP1A1 studied in this work. The structure was taken from the MD simulation for model III based on the snapshot at 97 nm and modified by truncating sidechains as described in the methodology section. This model has 308 atoms.



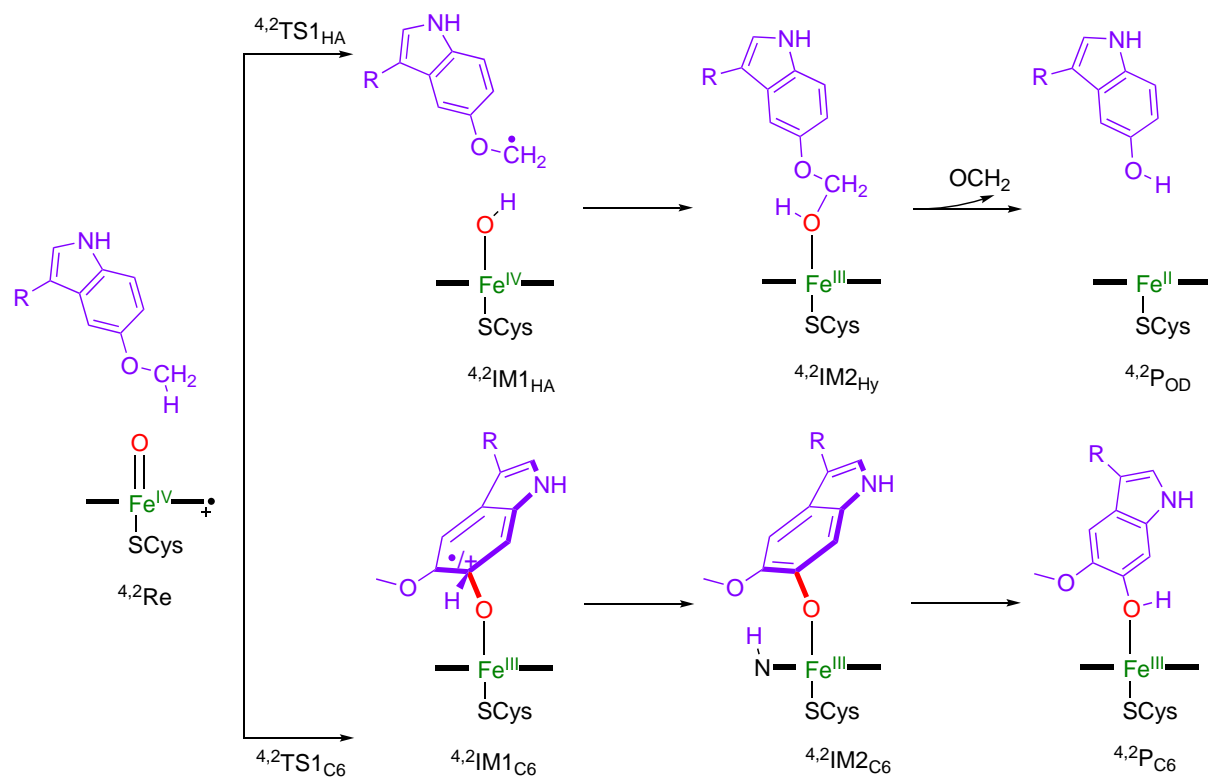

**Figure S25.** Calculated reaction mechanisms with definition of the labels of the structures.

## QM simulation

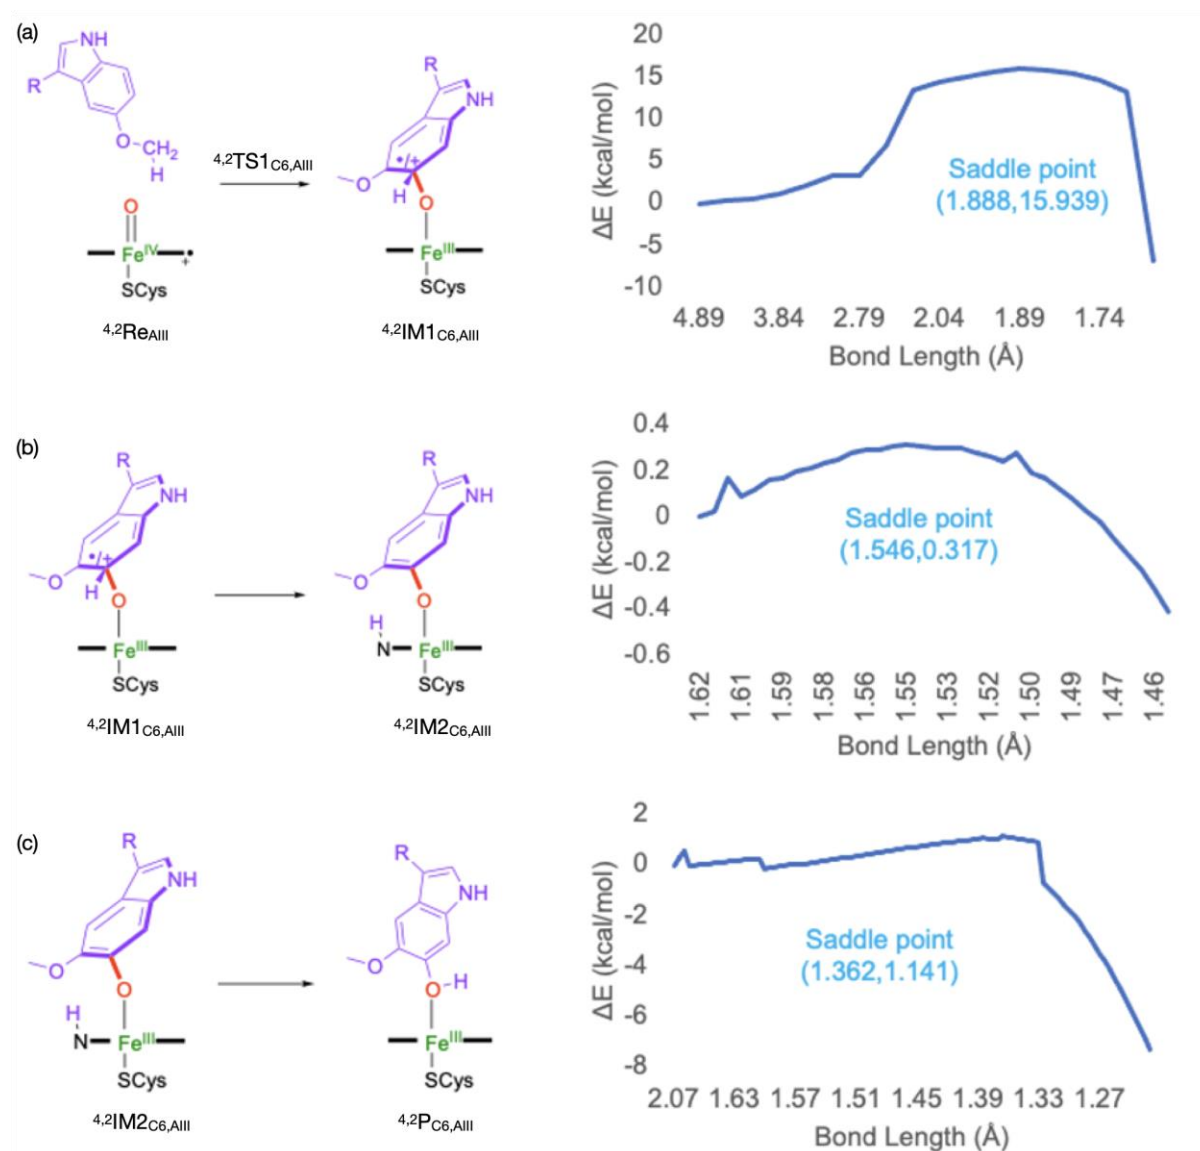

**Figure S26.** UB3LYP/BS1 calculated geometry scans for steps along the aromatic hydroxylation pathway. (a) The maximum for the scan from  $4\text{Re}_{\text{AIII}}$  to  $4\text{IM1}_{\text{C6,AIII}}$  was taken and geometry optimised to find  $4\text{TS1}_{\text{C6,AIII}}$ . (b) Geometry scan for proton transfer from the ipso position to porphyrin. This scan shows a small barrier of  $< 0.5 \text{ kcal mol}^{-1}$  for proton transfer. (c) Geometry scan for proton transfer from porphyrin to phenol groups. This scan shows a small barrier of  $< 1.5 \text{ kcal mol}^{-1}$  for proton transfer.

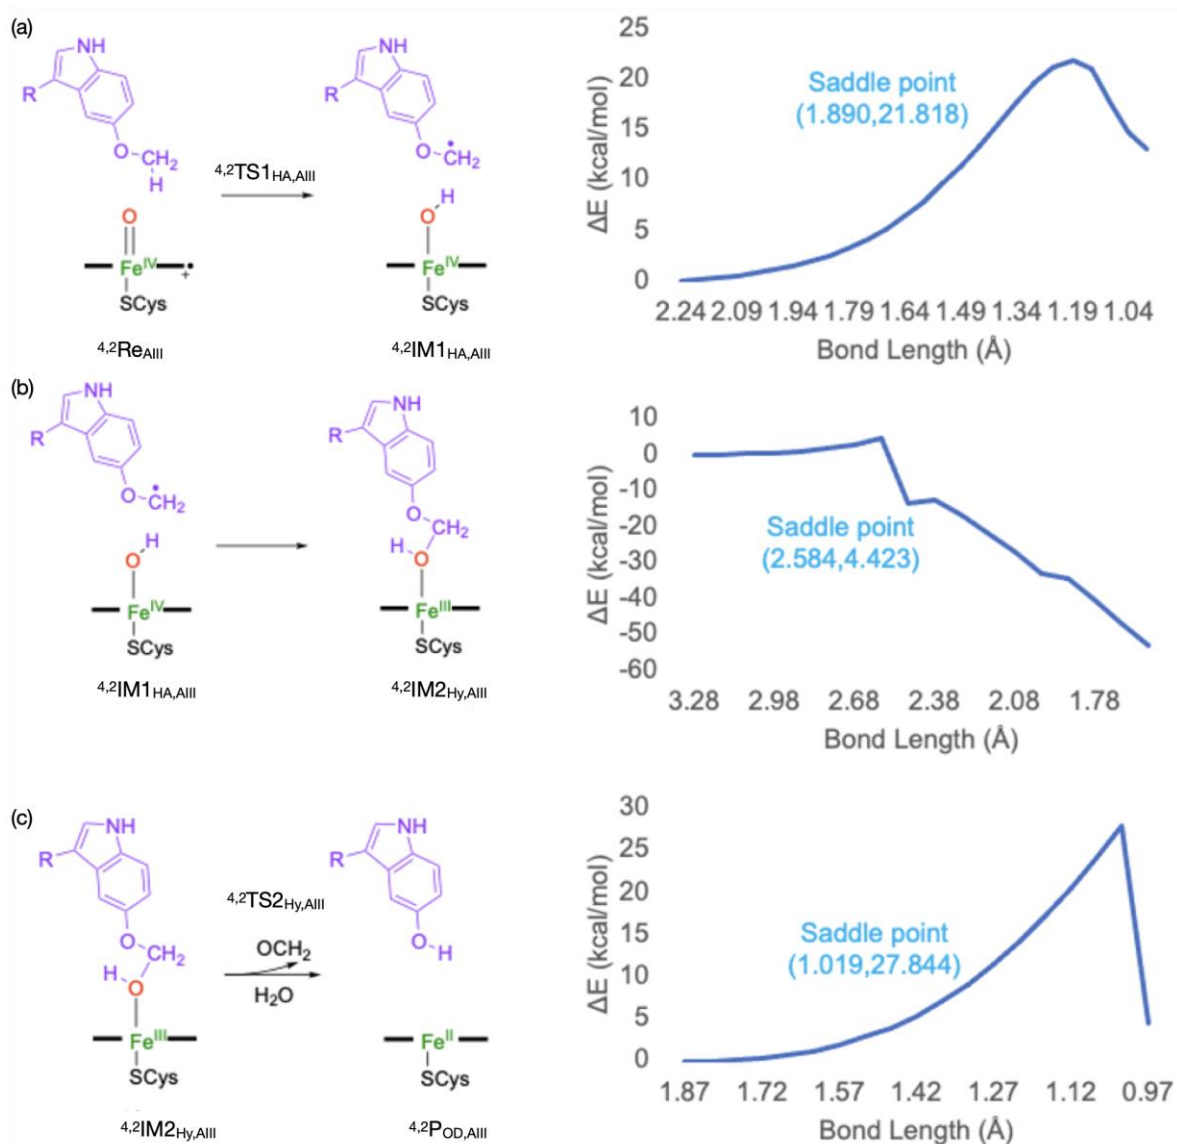

**Figure S27.** UB3LYP/BS1 calculated geometry scans for the O-demethylation pathway for model A. (a) Hydrogen atom abstraction scan from  ${}^4\text{Re}_{\text{AIII}}$ . The structure at the maximum of the scan from  ${}^4\text{Re}_{\text{AIII}}$  to  ${}^4\text{IM1}_{\text{HA,AIII}}$  was used to search for the transition state. (b) Rebound scan between  ${}^4\text{IM2}_{\text{Hy,AIII}}$  to  ${}^4\text{POD}_{\text{AIII}}$ . The maximum of the scan was used to search for  ${}^4\text{TS}_{\text{reb,AIII}}$ . (c) Deformylation pathway from  ${}^4\text{IM2}_{\text{Hy,AIII}}$ .

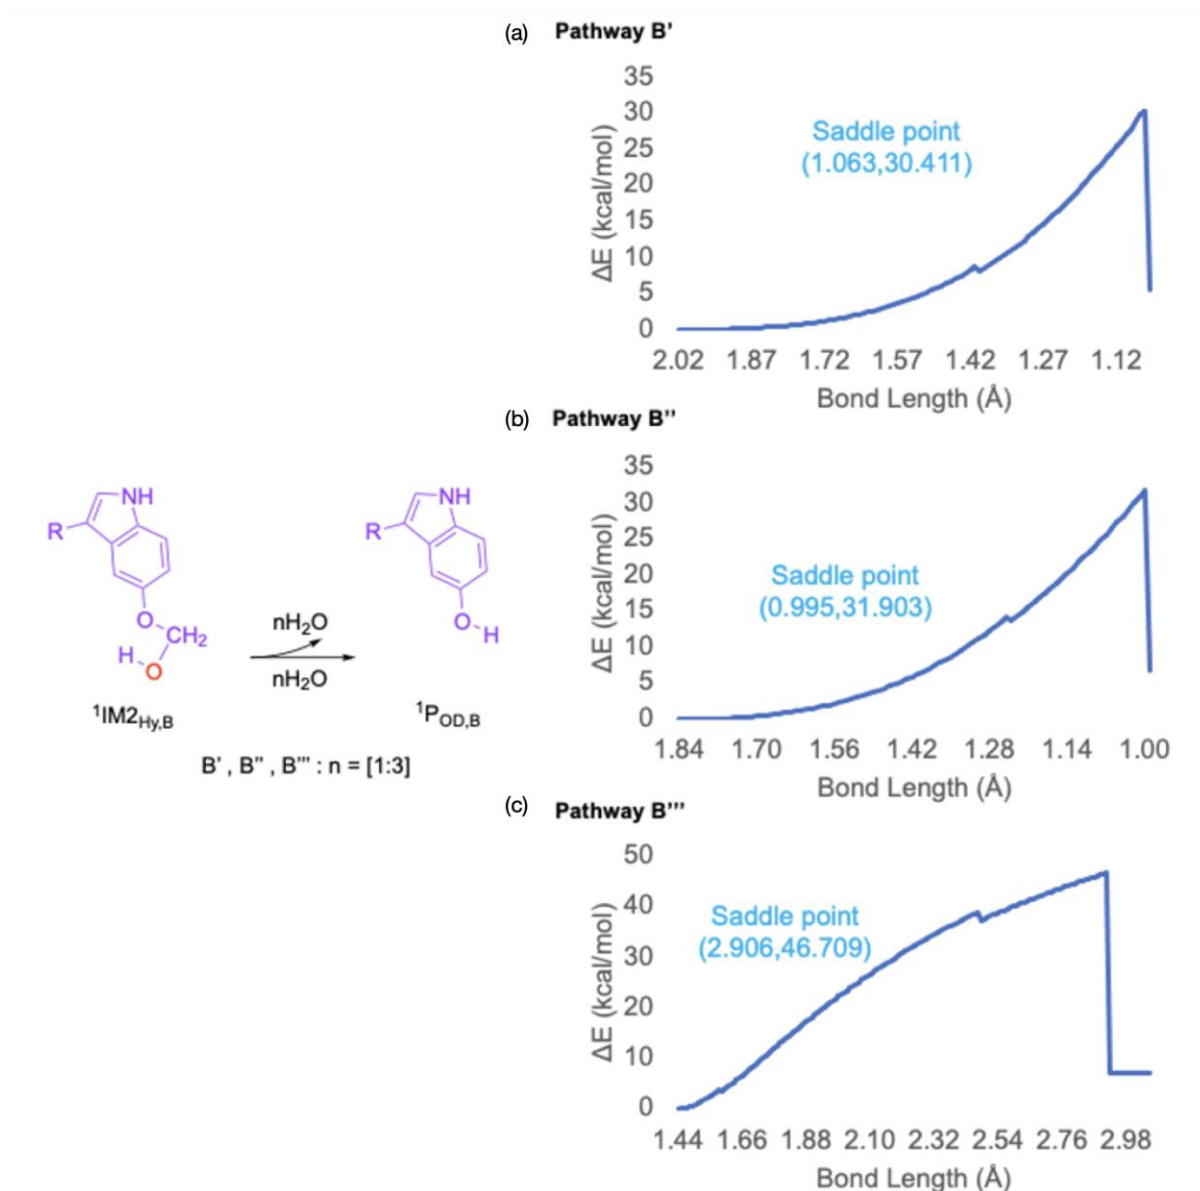

**Figure S28.** Geometry scans for the O-demethylation pathway outside the protein in a water environment, model **B**. The maxima of the scans for pathway **B'**, **B''** and **B'''** were used to find  $^1\text{TS}_{\text{Hy},\text{B}'}$ ,  $^1\text{TS}_{\text{Hy},\text{B}''}$  and  $^1\text{TS}_{\text{Hy},\text{B}'}$ . (a) Scan for  $n = 1$  water. (b) Scan for  $n = 2$  waters. (c) Scan for  $n = 3$  waters.

Pathway B'

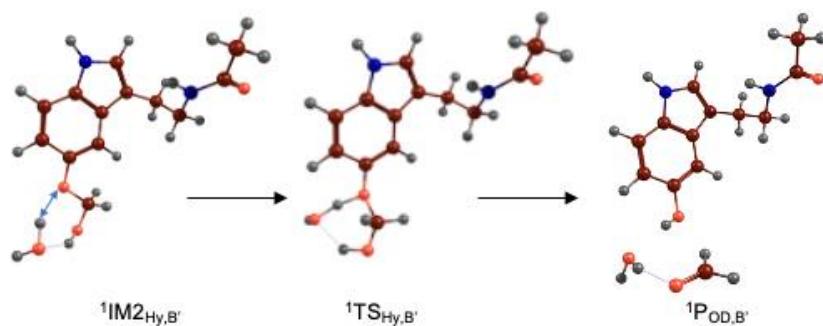

Pathway B''

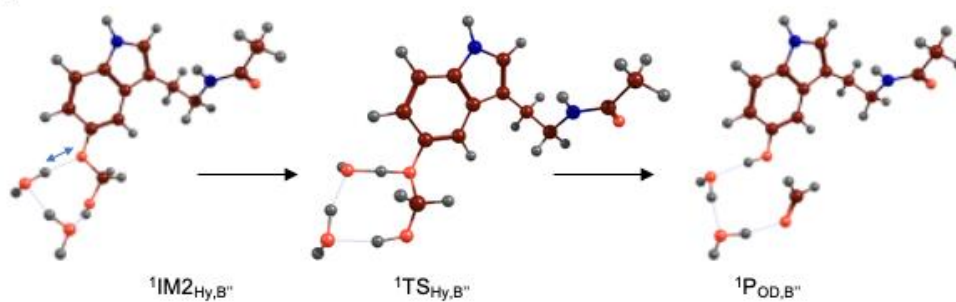

Pathway B'''

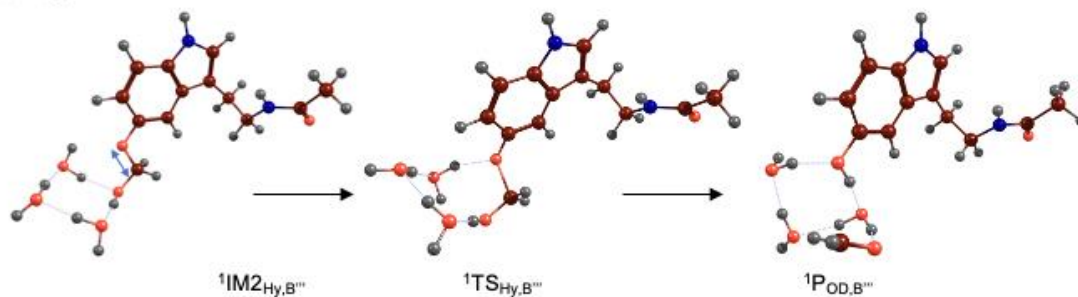

**Figure S29.** UB3LYP/BS1 optimized geometries for the local minima for pathways **B'**, **B''** and **B'''**.

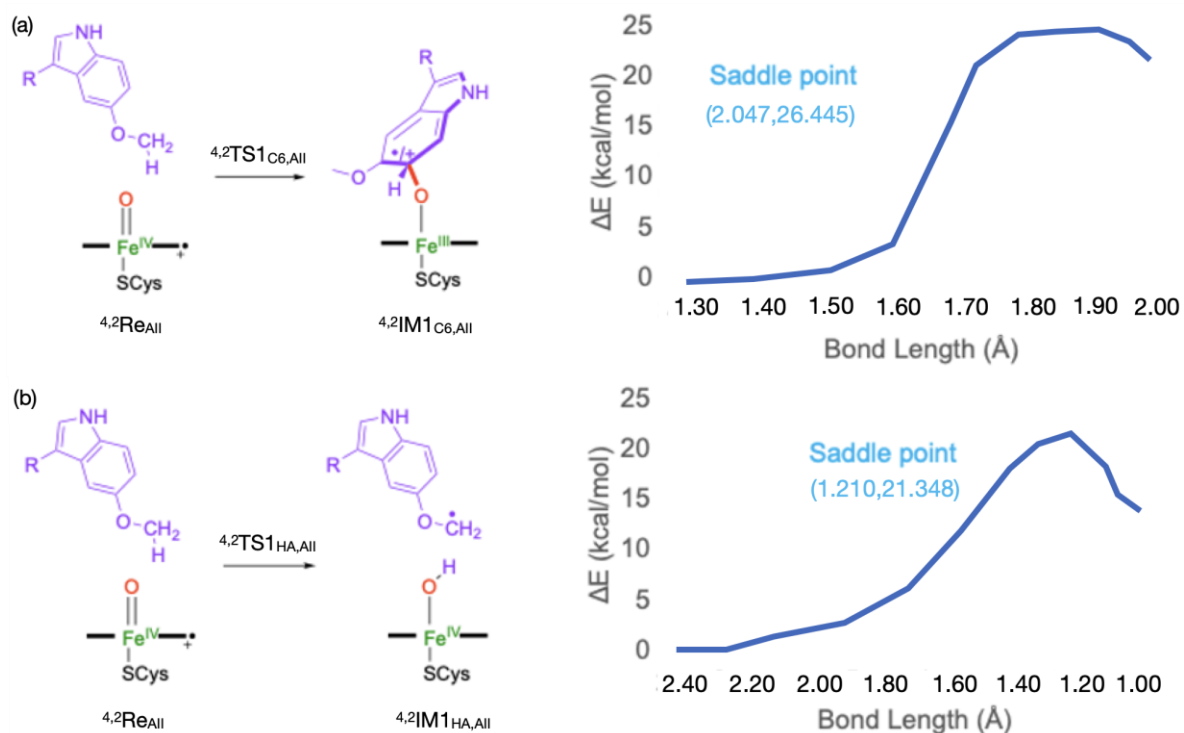

**Figure S30.** UB3LYP/BS1 calculated geometry scans for the O-demethylation pathway and the aromatic hydroxylation pathway for model **AII**. (a) The maximum for the scan from  ${}^4\text{Re}_{\text{AII}}$  to  ${}^4\text{IM1}_{\text{C6,AII}}$  was taken and geometry optimised to find  ${}^4\text{TS1}_{\text{C6,AII}}$ . (a) Hydrogen atom abstraction scan from  ${}^4\text{Re}_{\text{AII}}$ . The structure at the maximum of the scan from  ${}^4\text{Re}_{\text{AII}}$  to  ${}^4\text{IM1}_{\text{HA,AII}}$  was used to search for the transition state.

**Table S1.** Absolute energies in kcal mol<sup>-1</sup> of UB3LYP/BS1 optimised geometries for the metabolism of melatonin by CYP1A1 through aromatic hydroxylation in the doublet and quartet spin states (model **A<sub>III</sub>**).

| CAL       | Energy | State                         |                                             |                                             |                                             |                                           | MUL |   |
|-----------|--------|-------------------------------|---------------------------------------------|---------------------------------------------|---------------------------------------------|-------------------------------------------|-----|---|
|           |        | Re <sub>A<sub>III</sub></sub> | TS1 <sub>C<sub>6</sub>,<sub>III</sub></sub> | IM1 <sub>C<sub>6</sub>,<sub>III</sub></sub> | IM2 <sub>C<sub>6</sub>,<sub>III</sub></sub> | P <sub>C<sub>6</sub>,<sub>III</sub></sub> |     |   |
| BS1       | ZPE    | 1648.548                      | 1648.630                                    | 1649.158                                    | 1648.825                                    | 1650.182                                  | 2   |   |
|           | E      | -4558521.938                  | -4558513.369                                | -4558543.137                                | -4558560.432                                | -4558584.334                              |     |   |
|           | E+ZPE  | -4556873.389                  | -4556864.739                                | -4556893.979                                | -4556911.607                                | -4556934.152                              |     |   |
|           | G      | -4557034.488                  | -4557020.910                                | -4557051.293                                | -4557068.469                                | -4557091.216                              |     |   |
| BS2       | E      | -4559698.982                  | -4559691.204                                | -4559719.535                                | -4559737.235                                | -4559762.225                              |     |   |
|           | E+ZPE  | -4558050.433                  | -4558042.574                                | -4558070.376                                | -4558088.411                                | -4558112.043                              |     |   |
|           | G      | -4558211.532                  | -4558198.745                                | -4558227.690                                | -4558245.273                                | -4558269.107                              |     |   |
| BS2 / SOL | E      | -4559806.597                  | -4559799.841                                | -4559825.253                                | -4559839.305                                | -4559862.704                              |     |   |
|           | E+ZPE  | -4558158.049                  | -4558151.211                                | -4558176.094                                | -4558190.480                                | -4558212.522                              |     |   |
|           | G      | -4558319.148                  | -4558307.382                                | -4558333.408                                | -4558347.342                                | -4558369.586                              |     |   |
| BS3 / SOL | E      | -5275393.324                  | -5275383.418                                | -5275407.803                                | -5275421.316                                | -5275444.434                              |     |   |
|           | E+ZPE  | -5273744.776                  | -5273734.788                                | -5273758.645                                | -5273772.491                                | -5273794.252                              |     |   |
|           | G      | -5273905.874                  | -5273890.959                                | -5273915.959                                | -5273929.353                                | -5273951.316                              |     |   |
| BS1       | ZPE    | 1648.596                      | 1648.149                                    | 1648.632                                    | 1648.462                                    | 1648.779                                  |     | 4 |
|           | E      | -4558521.869                  | -4558508.526                                | -4558515.167                                | -4558552.427                                | -4558572.936                              |     |   |
|           | E+ZPE  | -4556873.273                  | -4556860.377                                | -4556866.535                                | -4556903.965                                | -4556924.157                              |     |   |
|           | G      | -4557034.525                  | -4557018.397                                | -4557052.937                                | -4557063.108                                | -4557084.249                              |     |   |
| BS2       | E      | -4559698.852                  | -4559686.731                                | -4559694.588                                | -4559731.648                                | -4559738.778                              |     |   |
|           | E+ZPE  | -4558050.256                  | -4558038.581                                | -4558045.956                                | -4558083.185                                | -4558089.998                              |     |   |
|           | G      | -4558211.508                  | -4558196.602                                | -4558232.357                                | -4558242.329                                | -4558250.091                              |     |   |
| BS2 / SOL | E      | -4559806.436                  | -4559792.946                                | -4559802.749                                | -4559835.200                                | -4559844.725                              |     |   |
|           | E+ZPE  | -4558157.840                  | -4558144.796                                | -4558154.117                                | -4558186.737                                | -4558195.945                              |     |   |
|           | G      | -4558319.092                  | -4558302.817                                | -4558340.519                                | -4558345.881                                | -4558356.038                              |     |   |
| BS3 / SOL | E      | -5275393.091                  | -5275379.247                                | -5275388.742                                | -5275411.905                                | -5275428.596                              |     |   |
|           | E+ZPE  | -5273744.495                  | -5273731.098                                | -5273740.110                                | -5273763.443                                | -5273779.817                              |     |   |
|           | G      | -5273905.747                  | -5273889.118                                | -5273926.512                                | -5273922.586                                | -5273939.909                              |     |   |

CAL : calculation method

MUL : multiplicity

BS1 : uB3LYP ( 6-31G\* : (C, H, O, N, and S) // LANL2DZ : (Fe) )

BS2 : uB3LYP ( 6-311+G\* : (C, H, O, N, and S) // LANL2DZ : (Fe) )

BS2 / SOL : uB3LYP ( 6-311+G\* : (C, H, O, N, and S) // LANL2DZ : (Fe) ) in chlorobenzene

BS3 / SOL : uB3LYP ( 6-311+G\* : (C, H, O, N, and S) // cc-PVTZ : (Fe) ) in chlorobenzene

**Table S2.** Relative energies in kcal mol<sup>-1</sup> of UB3LYP/BS1 optimised geometries for the metabolism of melatonin by CYP1A1 through aromatic hydroxylation in the doublet and quartet spin state (model **A<sub>III</sub>**).

| CAL       | Energy   | State                         |                                             |                                             |                                             |                                           | MUL |   |
|-----------|----------|-------------------------------|---------------------------------------------|---------------------------------------------|---------------------------------------------|-------------------------------------------|-----|---|
|           |          | Re <sub>A<sub>III</sub></sub> | TS1 <sub>C<sub>6</sub>,<sub>III</sub></sub> | IM1 <sub>C<sub>6</sub>,<sub>III</sub></sub> | IM2 <sub>C<sub>6</sub>,<sub>III</sub></sub> | P <sub>C<sub>6</sub>,<sub>III</sub></sub> |     |   |
| BS1       | ΔE       | 0.000                         | 8.569                                       | -21.199                                     | -38.494                                     | -62.396                                   | 2   |   |
|           | Δ(E+ZPE) | 0.000                         | 8.65                                        | -20.59                                      | -38.218                                     | -60.763                                   |     |   |
|           | ΔG       | 0.000                         | 13.578                                      | -16.805                                     | -33.981                                     | -56.728                                   |     |   |
| BS2       | ΔE       | 0.000                         | 7.778                                       | -20.553                                     | -38.253                                     | -63.243                                   |     |   |
|           | Δ(E+ZPE) | 0.000                         | 7.859                                       | -19.943                                     | -37.978                                     | -61.61                                    |     |   |
|           | ΔG       | 0.000                         | 12.787                                      | -16.158                                     | -33.741                                     | -57.575                                   |     |   |
| BS2 / SOL | ΔE       | 0.000                         | 6.756                                       | -18.656                                     | -32.708                                     | -56.107                                   |     |   |
|           | Δ(E+ZPE) | 0.000                         | 6.838                                       | -18.045                                     | -32.431                                     | -54.473                                   |     |   |
|           | ΔG       | 0.000                         | 11.766                                      | -14.26                                      | -28.194                                     | -50.438                                   |     |   |
| BS3 / SOL | ΔE       | 0.000                         | 9.906                                       | -14.479                                     | -27.992                                     | -51.111                                   |     |   |
|           | Δ(E+ZPE) | 0.000                         | 9.988                                       | -13.869                                     | -27.715                                     | -49.477                                   |     |   |
|           | ΔG       | 0.000                         | 14.915                                      | -10.085                                     | -23.479                                     | -45.443                                   |     |   |
| BS1       | ΔE       | 0.069                         | 13.412                                      | 6.771                                       | -30.489                                     | -50.998                                   |     | 4 |
|           | Δ(E+ZPE) | 0.116                         | 13.012                                      | 6.854                                       | -30.576                                     | -50.768                                   |     |   |
|           | ΔG       | -0.037                        | 16.091                                      | -18.449                                     | -28.620                                     | -49.761                                   |     |   |
| BS2       | ΔE       | 0.130                         | 12.251                                      | 4.394                                       | -32.666                                     | -39.796                                   |     |   |
|           | Δ(E+ZPE) | 0.177                         | 11.852                                      | 4.477                                       | -32.752                                     | -39.565                                   |     |   |
|           | ΔG       | 0.024                         | 14.930                                      | -20.825                                     | -30.797                                     | -38.559                                   |     |   |
| BS2 / SOL | ΔE       | 0.161                         | 13.651                                      | 3.848                                       | -28.603                                     | -38.128                                   |     |   |
|           | Δ(E+ZPE) | 0.209                         | 13.253                                      | 3.932                                       | -28.688                                     | -37.896                                   |     |   |
|           | ΔG       | 0.056                         | 16.331                                      | -21.371                                     | -26.733                                     | -36.890                                   |     |   |
| BS3 / SOL | ΔE       | 0.233                         | 14.077                                      | 4.582                                       | -18.581                                     | -35.272                                   |     |   |
|           | Δ(E+ZPE) | 0.281                         | 13.678                                      | 4.666                                       | -18.667                                     | -35.041                                   |     |   |
|           | ΔG       | 0.127                         | 16.756                                      | -20.638                                     | -16.712                                     | -34.035                                   |     |   |

CAL : calculation method

MUL : multiplicity

BS1 : uB3LYP ( 6-31G\* : (C, H, O, N, and S) // LANL2DZ : (Fe) )

BS2 : uB3LYP ( 6-311+G\* : (C, H, O, N, and S) // LANL2DZ : (Fe) )

BS2 / SOL : uB3LYP ( 6-311+G\* : (C, H, O, N, and S) // LANL2DZ : (Fe) ) in chlorobenzene

BS3 / SOL : uB3LYP ( 6-311+G\* : (C, H, O, N, and S) // cc-PVTZ : (Fe) ) in chlorobenzene



**Table S3.** Absolute energies in kcal mol<sup>-1</sup> of UB3LYP/BS1 optimised geometries for the metabolism of melatonin by CYP1A1 through O-demethylation in the doublet and quartet spin state (model A<sub>III</sub>).

| CAL       | Energy | State              |                       |                       |                     | MUL |   |
|-----------|--------|--------------------|-----------------------|-----------------------|---------------------|-----|---|
|           |        | Re <sub>AIII</sub> | TS1 <sub>HA,III</sub> | IM1 <sub>HA,III</sub> | P <sub>Hy,III</sub> |     |   |
| BS1       | ZPE    | 1648.548           | 1645.051              | 1646.653              | 1650.927            | 2   |   |
|           | E      | -4558521.938       | -4558498.765          | -4558511.684          | -4558578.499        |     |   |
|           | E+ZPE  | -4556873.389       | -4556853.714          | -4556865.031          | -4556927.572        |     |   |
|           | G      | -4557034.488       | -4557011.336          | -4557024.711          | -4557085.868        |     |   |
| BS2       | E      | -4559698.982       | -4559676.004          | -4559691.722          | -4559758.53         |     |   |
|           | E+ZPE  | -4558050.433       | -4558030.953          | -4558045.068          | -4558107.604        |     |   |
|           | G      | -4558211.532       | -4558188.576          | -4558204.749          | -4558265.9          |     |   |
| BS2 / SOL | E      | -4559806.597       | -4559782.961          | -4559796.685          | -4559863.107        |     |   |
|           | E+ZPE  | -4558158.049       | -4558137.91           | -4558150.031          | -4558212.18         |     |   |
|           | G      | -4559967.696       | -4559940.583          | -4559956.365          | -4560021.403        |     |   |
| BS3 / SOL | E      | -5275393.324       | -5275372.05           | -5275378.59           | -5275445.236        |     |   |
|           | E+ZPE  | -5273744.776       | -5273726.999          | -5273731.937          | -5273794.309        |     |   |
|           | G      | -5273905.874       | -5273884.621          | -5273891.617          | -5273952.605        |     |   |
| BS1       | ZPE    | 1648.596           | 1644.575              | 1646.655              | 1649.857            |     | 4 |
|           | E      | -4558521.869       | -4558499.518          | -4558511.134          | -4558573.868        |     |   |
|           | E+ZPE  | -4556873.273       | -4556854.943          | -4556864.479          | -4556924.011        |     |   |
|           | G      | -4557034.525       | -4557014.451          | -4557024.709          | -4557085.068        |     |   |
| BS2       | E      | -4559698.852       | -4559676.665          | -4559690.941          | -4559755.08         |     |   |
|           | E+ZPE  | -4558050.256       | -4558032.09           | -4558044.286          | -4558105.223        |     |   |
|           | G      | -4558211.508       | -4558191.598          | -4558204.516          | -4558266.279        |     |   |
| BS2 / SOL | E      | -4559806.436       | -4559783.405          | -4559796.034          | -4559861.325        |     |   |
|           | E+ZPE  | -4558157.840       | -4558138.830          | -4558149.379          | -4558211.468        |     |   |
|           | G      | -4559967.688       | -4559942.913          | -4559956.265          | -4560022.382        |     |   |
| BS3 / SOL | E      | -5275393.091       | -5275367.028          | -5275378.966          | -5275444.362        |     |   |
|           | E+ZPE  | -5273744.495       | -5273722.453          | -5273732.311          | -5273794.505        |     |   |
|           | G      | -5273905.747       | -5273881.961          | -5273892.541          | -5273955.562        |     |   |

CAL : calculation method

MUL : multiplicity

BS1 : uB3LYP ( 6-31G\* : (C, H, O, N, and S) // LANL2DZ : (Fe) )

BS2 : uB3LYP ( 6-311+G\* : (C, H, O, N, and S) // LANL2DZ : (Fe) )

BS2 / SOL : uB3LYP ( 6-311+G\* : (C, H, O, N, and S) // LANL2DZ : (Fe) ) in chlorobenzene

BS3 / SOL : uB3LYP ( 6-311+G\* : (C, H, O, N, and S) // cc-PVTZ : (Fe) ) in chlorobenzene

**Table S4.** Relative energies in kcal mol<sup>-1</sup> of UB3LYP/BS1 optimised geometries for the metabolism of melatonin by CYP1A1 through O-demethylation in the doublet and quartet spin state (model **A<sub>III</sub>**).

| CAL       | Energy   | State              |                       |                       |                     | MUL |   |
|-----------|----------|--------------------|-----------------------|-----------------------|---------------------|-----|---|
|           |          | Re <sub>AIII</sub> | TS1 <sub>HA,III</sub> | IM1 <sub>HA,III</sub> | P <sub>Hy,III</sub> |     |   |
| BS1       | ΔE       | 0.000              | 23.173                | 10.254                | -56.561             | 2   |   |
|           | Δ(E+ZPE) | 0.000              | 19.675                | 8.358                 | -54.183             |     |   |
|           | ΔG       | 0.000              | 23.152                | 9.777                 | -51.380             |     |   |
| BS2       | ΔE       | 0.000              | 22.978                | 7.260                 | -59.548             |     |   |
|           | Δ(E+ZPE) | 0.000              | 19.480                | 5.365                 | -57.171             |     |   |
|           | ΔG       | 0.000              | 22.956                | 6.783                 | -54.368             |     |   |
| BS2 / SOL | ΔE       | 0.000              | 23.636                | 9.912                 | -56.510             |     |   |
|           | Δ(E+ZPE) | 0.000              | 20.139                | 8.018                 | -54.131             |     |   |
|           | ΔG       | 0.000              | 27.113                | 11.331                | -53.707             |     |   |
| BS3 / SOL | ΔE       | 0.000              | 21.274                | 14.734                | -51.912             |     |   |
|           | Δ(E+ZPE) | 0.000              | 17.777                | 12.839                | -49.533             |     |   |
|           | ΔG       | 0.000              | 21.253                | 14.257                | -46.731             |     |   |
| BS1       | ΔE       | 0.069              | 22.420                | 10.804                | -51.930             |     | 4 |
|           | Δ(E+ZPE) | 0.116              | 18.446                | 8.910                 | -50.622             |     |   |
|           | ΔG       | -0.037             | 20.037                | 9.779                 | -50.580             |     |   |
| BS2       | ΔE       | 0.130              | 22.317                | 8.041                 | -56.098             |     |   |
|           | Δ(E+ZPE) | 0.177              | 18.343                | 6.147                 | -54.790             |     |   |
|           | ΔG       | 0.024              | 19.934                | 7.016                 | -54.747             |     |   |
| BS2 / SOL | ΔE       | 0.161              | 23.192                | 10.563                | -54.728             |     |   |
|           | Δ(E+ZPE) | 0.209              | 19.219                | 8.670                 | -53.419             |     |   |
|           | ΔG       | 0.008              | 24.783                | 11.431                | -54.686             |     |   |
| BS3 / SOL | ΔE       | 0.233              | 26.295                | 14.358                | -51.038             |     |   |
|           | Δ(E+ZPE) | 0.281              | 22.322                | 12.465                | -49.729             |     |   |
|           | ΔG       | 0.127              | 23.912                | 13.333                | -49.688             |     |   |

CAL : calculation method

MUL : multiplicity

BS1 : uB3LYP ( 6-31G\* : (C, H, O, N, and S) // LANL2DZ : (Fe) )

BS2 : uB3LYP ( 6-311+G\* : (C, H, O, N, and S) // LANL2DZ : (Fe) )

BS2 / SOL : uB3LYP ( 6-311+G\* : (C, H, O, N, and S) // LANL2DZ : (Fe) ) in chlorobenzene

BS3 / SOL : uB3LYP ( 6-311+G\* : (C, H, O, N, and S) // cc-PVTZ : (Fe) ) in chlorobenzene

**Table S5.** Absolute energies in kcal mol<sup>-1</sup> of UB3LYP/BS1 optimised geometries for the metabolism of melatonin by CYP1A1 through O-demethylation in quartet spin state (model A<sub>III</sub>).

| CAL       | Energy | State                |                       |                      | MUL |
|-----------|--------|----------------------|-----------------------|----------------------|-----|
|           |        | P <sub>Hy,AIII</sub> | TS <sub>Hy,AIII</sub> | P <sub>Od,AIII</sub> |     |
| BS1       | ZPE    | 1648.8471            | 1646.895545           | 1645.484276          | 4   |
|           | E      | -4558568.434         | -4558545.339          | -4558535.89          |     |
|           | E+ZPE  | -4556919.587         | -4556898.444          | -4556890.405         |     |
|           | G      | -4557078.892         | -4557053.782          | -4557053.838         |     |
| BS2       | E      | -4559749.363         | -4559725.773          | -4559719.299         |     |
|           | E+ZPE  | -4558100.516         | -4558078.877          | -4558073.815         |     |
|           | G      | -4558259.82          | -4558234.216          | -4558237.247         |     |
| BS2 / SOL | E      | -4559852.077         | -4559830.132          | -4559823.679         |     |
|           | E+ZPE  | -4558203.23          | -4558183.236          | -4558178.195         |     |
|           | G      | -4558362.535         | -4558338.574          | -4558341.627         |     |

CAL : calculation method  
MUL : multiplicity

BS1 : uB3LYP ( 6-31G\* : (C, H, O, N, and S) // LANL2DZ : (Fe) )  
BS2 : uB3LYP ( 6-311+G\* : (C, H, O, N, and S) // LANL2DZ : (Fe) )  
BS2 / SOL : uB3LYP ( 6-311+G\* : (C, H, O, N, and S) // LANL2DZ : (Fe) ) in chlorobenzene

**Table S6.** Relative energies in kcal mol<sup>-1</sup> of UB3LYP/BS1 optimised geometries for the metabolism of melatonin by CYP1A1 through O-demethylation in quartet spin states (model A<sub>III</sub>).

| CAL       | Energy   | State                |                       |                      | MUL |
|-----------|----------|----------------------|-----------------------|----------------------|-----|
|           |          | P <sub>Hy,AIII</sub> | TS <sub>Hy,AIII</sub> | P <sub>Od,AIII</sub> |     |
| BS1       | ΔE       | 0.000                | 23.095                | 32.545               | 4   |
|           | Δ(E+ZPE) | 0.000                | 21.143                | 29.182               |     |
|           | ΔG       | 0.000                | 25.110                | 25.054               |     |
| BS2       | ΔE       | 0.000                | 23.590                | 30.064               |     |
|           | Δ(E+ZPE) | 0.000                | 21.638                | 26.701               |     |
|           | ΔG       | 0.000                | 25.605                | 22.573               |     |
| BS2 / SOL | ΔE       | 0.000                | 21.946                | 28.398               |     |
|           | Δ(E+ZPE) | 0.000                | 19.994                | 25.035               |     |
|           | ΔG       | 0.000                | 23.960                | 20.908               |     |

CAL : calculation method

MUL : multiplicity

BS1 : uB3LYP ( 6-31G\* : (C, H, O, N, and S) // LANL2DZ : (Fe) )

BS2 : uB3LYP ( 6-311+G\* : (C, H, O, N, and S) // LANL2DZ : (Fe) )

BS2 / SOL : uB3LYP ( 6-311+G\* : (C, H, O, N, and S) // LANL2DZ : (Fe) ) in chlorobenzene

**Table S7.** Absolute energies in kcal mol<sup>-1</sup> of UB3LYP/BS1 optimised geometries for the non-protein O-demethylation via pathway **B'** in the singlet spin state.

| CAL       | Energy | State                |                     |                    | MUL |
|-----------|--------|----------------------|---------------------|--------------------|-----|
|           |        | IM2 <sub>Hy,B'</sub> | TS <sub>Hy,B'</sub> | P <sub>OD,B'</sub> |     |
| BS1       | ZPE    | 191.578              | 0.30208             | 0.300963           | 1   |
|           | E      | -575189.4            | -575159             | -575185.5          |     |
|           | E+ZPE  | -574997.8            | -574969.5           | -574996.7          |     |
|           | G      | -575030.9            | -574998.7           | -575032            |     |
| BS2       | E      | -575344.4            | -575314.5           | -575343            |     |
|           | E+ZPE  | -575152.9            | -575125             | -575154.1          |     |
|           | G      | -575185.9            | -575154.2           | -575189.5          |     |
| BS2 / SOL | E      | -575357.7            | -575327.6           | -575355.6          |     |
|           | E+ZPE  | -575166.1            | -575138             | -575166.8          |     |
|           | G      | -575199.2            | -575167.2           | -575202.1          |     |

CAL : calculation method  
MUL : multiplicity

BS1 : uB3LYP ( 6-31G\* : (C, H, O, N, and S)  
BS2 : uB3LYP ( 6-311+G\* : (C, H, O, N, and S)  
BS2 / SOL : uB3LYP ( 6-311+G\* : (C, H, O, N, and S)

**Table S8.** Relative energies in kcal mol<sup>-1</sup> of UB3LYP/BS1 optimised geometries for the non-protein O-demethylation via pathway **B'** in the singlet spin state.

| CAL       | Energy   | State                |                     |                    | MUL |
|-----------|----------|----------------------|---------------------|--------------------|-----|
|           |          | IM2 <sub>Hy,B'</sub> | TS <sub>Hy,B'</sub> | P <sub>OD,B'</sub> |     |
| BS1       | ΔE       | 0.000                | 30.411              | 3.904              | 1   |
|           | Δ(E+ZPE) | 0.000                | 28.391              | 1.183              |     |
|           | ΔG       | 0.000                | 32.199              | -1.118             |     |
| BS2       | ΔE       | 0.000                | 29.896              | 1.451              |     |
|           | Δ(E+ZPE) | 0.000                | 27.877              | -1.270             |     |
|           | ΔG       | 0.000                | 31.684              | -3.572             |     |
| BS2 / SOL | ΔE       | 0.000                | 30.164              | 2.078              |     |
|           | Δ(E+ZPE) | 0.000                | 28.144              | -0.643             |     |
|           | ΔG       | 0.000                | 31.952              | -2.945             |     |

CAL : calculation method  
MUL : multiplicity

BS1 : uB3LYP ( 6-31G\* : (C, H, O, N, and S)  
BS2 : uB3LYP ( 6-311+G\* : (C, H, O, N, and S)  
BS2 / SOL : uB3LYP ( 6-311+G\* : (C, H, O, N, and S)

**Table S9.** Absolute energies in kcal mol<sup>-1</sup> of UB3LYP/BS1 optimised geometries for the non-protein O-demethylation via pathway B'' in the singlet spin state.

| CAL       | Energy | State                 |                      |                     | MUL |
|-----------|--------|-----------------------|----------------------|---------------------|-----|
|           |        | IM2 <sub>Hy,B''</sub> | TS <sub>Hy,B''</sub> | P <sub>OD,B''</sub> |     |
| BS1       | ZPE    | 207.524294            | 205.147916           | 204.770783          | 1   |
|           | E      | -623151.96            | -623119.27           | -623145.2           |     |
|           | E+ZPE  | -622944.44            | -622914.12           | -622940.43          |     |
|           | G      | -622980.03            | -622945.43           | -622978.15          |     |
| BS2       | E      | -623326.71            | -623295.59           | -623323.3           |     |
|           | E+ZPE  | -623119.19            | -623090.44           | -623118.53          |     |
|           | G      | -623154.78            | -623121.75           | -623156.25          |     |
| BS2 / SOL | E      | -623341.01            | -623310.2            | -623337.5           |     |
|           | E+ZPE  | -623133.48            | -623105.05           | -623132.73          |     |
|           | G      | -623169.07            | -623136.36           | -623170.45          |     |

CAL : calculation method  
MUL : multiplicity

BS1 : uB3LYP ( 6-31G\* : (C, H, O, N, and S)  
BS2 : uB3LYP ( 6-311+G\* : (C, H, O, N, and S)  
BS2 / SOL : uB3LYP ( 6-311+G\* : (C, H, O, N, and S)

**Table S10.** Relative energies in kcal mol<sup>-1</sup> of UB3LYP/BS1 optimised geometries for the non-protein O-demethylation via pathway B'' in the singlet spin state.

| CAL       | Energy   | State                 |                      |                     | MUL |
|-----------|----------|-----------------------|----------------------|---------------------|-----|
|           |          | IM2 <sub>Hy,B''</sub> | TS <sub>Hy,B''</sub> | P <sub>OD,B''</sub> |     |
| BS1       | ΔE       | 0.000                 | 32.689               | 6.760               | 1   |
|           | Δ(E+ZPE) | 0.000                 | 30.312               | 4.007               |     |
|           | ΔG       | 0.000                 | 34.596               | 1.876               |     |
| BS2       | ΔE       | 0.000                 | 31.118               | 3.411               |     |
|           | Δ(E+ZPE) | 0.000                 | 28.742               | 0.657               |     |
|           | ΔG       | 0.000                 | 33.026               | -1.473              |     |
| BS2 / SOL | ΔE       | 0.000                 | 30.810               | 3.502               |     |
|           | Δ(E+ZPE) | 0.000                 | 28.433               | 0.749               |     |
|           | ΔG       | 0.000                 | 32.717               | -1.382              |     |

CAL : calculation method  
MUL : multiplicity

BS1 : uB3LYP ( 6-31G\* : (C, H, O, N, and S)  
BS2 : uB3LYP ( 6-311+G\* : (C, H, O, N, and S)  
BS2 / SOL : uB3LYP ( 6-311+G\* : (C, H, O, N, and S)

**Table S11.** Absolute energies in kcal mol<sup>-1</sup> of UB3LYP/BS1 optimised geometries for the non-protein O-demethylation via pathway B''' in the singlet spin state.

| CAL       | Energy | State                  |                       |                      | MUL |
|-----------|--------|------------------------|-----------------------|----------------------|-----|
|           |        | IM2 <sub>Hy,B'''</sub> | TS <sub>Hy,B'''</sub> | P <sub>OD,B'''</sub> |     |
| BS1       | ZPE    | 223.620                | 221.329               | 221.060              | 1   |
|           | E      | -671114.476            | -671085.325           | -671104.970          |     |
|           | E+ZPE  | -670890.856            | -670863.996           | -670883.909          |     |
|           | G      | -670928.569            | -670896.081           | -670923.350          |     |
| BS2       | E      | -671308.806            | -671281.962           | -671300.539          |     |
|           | E+ZPE  | -671085.186            | -671060.633           | -671079.479          |     |
|           | G      | -671122.898            | -671092.718           | -671118.920          |     |
| BS2 / SOL | E      | -671324.202            | -671297.939           | -671315.960          |     |
|           | E+ZPE  | -671100.582            | -671076.610           | -671094.899          |     |
|           | G      | -671138.294            | -671108.694           | -671134.340          |     |

CAL : calculation method  
MUL : multiplicity

BS1 : uB3LYP ( 6-31G\* : (C, H, O, N, and S)  
BS2 : uB3LYP ( 6-311+G\* : (C, H, O, N, and S)  
BS2 / SOL : uB3LYP ( 6-311+G\* : (C, H, O, N, and S)

**Table S12.** Relative energies in kcal mol<sup>-1</sup> of UB3LYP/BS1 optimised geometries for the non-protein O-demethylation via pathway B''' in the singlet spin state.

| CAL       | Energy   | State                  |                       |                      | MUL |
|-----------|----------|------------------------|-----------------------|----------------------|-----|
|           |          | IM2 <sub>Hy,B'''</sub> | TS <sub>Hy,B'''</sub> | P <sub>OD,B'''</sub> |     |
| BS1       | ΔE       | 0.000                  | 29.151                | 9.507                | 1   |
|           | Δ(E+ZPE) | 0.000                  | 26.860                | 6.947                |     |
|           | ΔG       | 0.000                  | 32.488                | 5.219                |     |
| BS2       | ΔE       | 0.000                  | 26.843                | 8.266                |     |
|           | Δ(E+ZPE) | 0.000                  | 24.552                | 5.707                |     |
|           | ΔG       | 0.000                  | 30.181                | 3.978                |     |
| BS2 / SOL | ΔE       | 0.000                  | 26.263                | 8.242                |     |
|           | Δ(E+ZPE) | 0.000                  | 23.972                | 5.682                |     |
|           | ΔG       | 0.000                  | 29.600                | 3.954                |     |

CAL : calculation method  
MUL : multiplicity

BS1 : uB3LYP ( 6-31G\* : (C, H, O, N, and S)  
BS2 : uB3LYP ( 6-311+G\* : (C, H, O, N, and S)  
BS2 / SOL : uB3LYP ( 6-311+G\* : (C, H, O, N, and S)

**Table S13.** Absolute energies in kcal mol<sup>-1</sup> of UB3LYP/BS1 optimised geometries for the metabolism of melatonin by CYP1A1 through aromatic hydroxylation in the doublet and quartet spin states (model **A<sub>II</sub>**).

| CAL       | Energy | State             |                      |                      | MUL |   |
|-----------|--------|-------------------|----------------------|----------------------|-----|---|
|           |        | Re <sub>All</sub> | TS1 <sub>HA,II</sub> | IM1 <sub>HA,II</sub> |     |   |
| BS1       | ZPE    | 1696.224695       | 1694.291965          | 1697.8763            | 2   |   |
|           | E      | -4689820.631      | -4689814.173         | -4689867.041         |     |   |
|           | E+ZPE  | -4688124.406      | -4688119.881         | -4688169.165         |     |   |
|           | G      | -4688293.24       | -4688283.953         | -4688337.273         |     |   |
| BS2       | E      | -4691038.944      | -4691029.509         | -4691090.979         |     |   |
|           | E+ZPE  | -4689342.719      | -4689335.218         | -4689393.103         |     |   |
|           | G      | -4689511.553      | -4689499.289         | -4689561.21          |     |   |
| BS2 / SOL | E      | -5406625.561      | -5406620.369         | -5406673.695         |     |   |
|           | E+ZPE  | -5404929.336      | -5404926.077         | -5404975.819         |     |   |
|           | G      | -5405098.17       | -5405090.149         | -5405143.927         |     |   |
| BS1       | ZPE    | 1696.28117        | 1693.586017          | 1695.686291          |     | 4 |
|           | E      | -4689820.551      | -4689812.312         | -4689834.788         |     |   |
|           | E+ZPE  | -4688124.27       | -4688118.726         | -4688139.101         |     |   |
|           | G      | -4688292.871      | -4688283.757         | -4688305.74          |     |   |
| BS2       | E      | -4691038.835      | -4691028.566         | -4691052.69          |     |   |
|           | E+ZPE  | -4689342.553      | -4689334.98          | -4689357.003         |     |   |
|           | G      | -4689511.155      | -4689500.012         | -4689523.642         |     |   |
| BS2 / SOL | E      | -5406625.702      | -5406616.215         | -5406638.586         |     |   |
|           | E+ZPE  | -5404929.421      | -5404922.629         | -5404942.9           |     |   |
|           | G      | -5405098.022      | -5405087.661         | -5405109.538         |     |   |

CAL : calculation method

MUL : multiplicity

BS1 : uB3LYP ( 6-31G\* : (C, H, O, N, and S) // LANL2DZ : (Fe) )

BS2 : uB3LYP ( 6-311+G\* : (C, H, O, N, and S) // LANL2DZ : (Fe) )

BS2 / SOL : uB3LYP ( 6-311+G\* : (C, H, O, N, and S) // LANL2DZ : (Fe) ) in chlorobenzene

BS3 / SOL : uB3LYP ( 6-311+G\* : (C, H, O, N, and S) // cc-PVTZ : (Fe) ) in chlorobenzene



**Table S14.** Relative energies in kcal mol<sup>-1</sup> of UB3LYP/BS1 optimised geometries for the metabolism of melatonin by CYP1A1 through aromatic hydroxylation in the doublet and quartet spin state (model A<sub>II</sub>).

| CAL       | Energy   | State             |                      |                      | MUL |
|-----------|----------|-------------------|----------------------|----------------------|-----|
|           |          | Re <sub>All</sub> | TS1 <sub>HA,II</sub> | IM1 <sub>HA,II</sub> |     |
| BS1       | ΔE       | 0.000             | 6.458                | -46.410              | 2   |
|           | Δ(E+ZPE) | 0.000             | 4.526                | -44.758              |     |
|           | ΔG       | 0.000             | 9.288                | -44.032              |     |
| BS2       | ΔE       | 0.000             | 9.435                | -52.035              |     |
|           | Δ(E+ZPE) | 0.000             | 7.502                | -50.383              |     |
|           | ΔG       | 0.000             | 12.264               | -49.657              |     |
| BS3 / SOL | ΔE       | 0.000             | 5.192                | -48.134              |     |
|           | Δ(E+ZPE) | 0.000             | 3.259                | -46.483              |     |
|           | ΔG       | 0.000             | 8.021                | -45.757              |     |
| BS1       | ΔE       | 0.000             | 8.239                | -14.237              | 4   |
|           | Δ(E+ZPE) | 0.137             | 5.681                | -14.695              |     |
|           | ΔG       | 0.370             | 9.483                | -12.499              |     |
| BS2       | ΔE       | 0.110             | 10.378               | -13.746              |     |
|           | Δ(E+ZPE) | 0.000             | 7.573                | -14.450              |     |
|           | ΔG       | 0.399             | 11.541               | -12.088              |     |
| BS3 / SOL | ΔE       | -0.141            | 9.346                | -13.025              |     |
|           | Δ(E+ZPE) | -0.084            | 6.707                | -13.564              |     |
|           | ΔG       | 0.148             | 10.509               | -11.368              |     |

CAL : calculation method  
MUL : multiplicity

BS1 : uB3LYP ( 6-31G\* : (C, H, O, N, and S) // LANL2DZ : (Fe) )

BS2 : uB3LYP ( 6-311+G\* : (C, H, O, N, and S) // LANL2DZ : (Fe) )

BS2 / SOL : uB3LYP ( 6-311+G\* : (C, H, O, N, and S) // LANL2DZ : (Fe) ) in chlorobenzene

BS3 / SOL : uB3LYP ( 6-311+G\* : (C, H, O, N, and S) // cc-PVTZ : (Fe) ) in chlorobenzene

**Table S15.** Absolute energies in kcal mol<sup>-1</sup> of UB3LYP/BS1 optimised geometries for the metabolism of melatonin by CYP1A1 through O-demethylation in the doublet and quartet spin state (model A<sub>II</sub>).

| CAL       | Energy | State             |                      |                      | MUL |   |
|-----------|--------|-------------------|----------------------|----------------------|-----|---|
|           |        | Re <sub>All</sub> | TS1 <sub>C6,II</sub> | IM1 <sub>C6,II</sub> |     |   |
| BS1       | ZPE    | 1696.224695       | 1697.123288          | 1698.151149          | 2   |   |
|           | E      | -4689820.631      | -4689818.164         | -4689844.582         |     |   |
|           | E+ZPE  | -4688124.406      | -4688121.04          | -4688146.431         |     |   |
|           | G      | -4688293.24       | -4688283.892         | -4688309.683         |     |   |
| BS2       | E      | -4691038.944      | -4691033.812         | -4691064.032         |     |   |
|           | E+ZPE  | -4689342.719      | -4689336.688         | -4689365.881         |     |   |
|           | G      | -4689511.553      | -4689499.54          | -4689529.132         |     |   |
| BS2 / SOL | E      | -5406625.561      | -5406619.993         | -5406646.375         |     |   |
|           | E+ZPE  | -5404929.336      | -5404922.87          | -5404948.224         |     |   |
|           | G      | -5405098.17       | -5405085.721         | -5405111.476         |     |   |
| BS1       | ZPE    | 1696.28117        | 1696.527154          | 1696.939428          |     | 4 |
|           | E      | -4689820.551      | -4689811.416         | -4689833.192         |     |   |
|           | E+ZPE  | -4688124.27       | -4688114.889         | -4688136.252         |     |   |
|           | G      | -4688292.871      | -4688278.996         | -4688301.34          |     |   |
| BS2       | E      | -4691038.835      | -4691026.562         | -4691053.545         |     |   |
|           | E+ZPE  | -4689342.553      | -4689330.035         | -4689356.605         |     |   |
|           | G      | -4689511.155      | -4689494.142         | -4689521.693         |     |   |
| BS2 / SOL | E      | -5406625.702      | -5406613.849         | -5406639.457         |     |   |
|           | E+ZPE  | -5404929.421      | -5404917.322         | -5404942.517         |     |   |
|           | G      | -5405098.022      | -5405081.429         | -5405107.605         |     |   |

CAL : calculation method

MUL : multiplicity

BS1 : uB3LYP ( 6-31G\* : (C, H, O, N, and S) // LANL2DZ : (Fe) )

BS2 : uB3LYP ( 6-311+G\* : (C, H, O, N, and S) // LANL2DZ : (Fe) )

BS2 / SOL : uB3LYP ( 6-311+G\* : (C, H, O, N, and S) // LANL2DZ : (Fe) ) in chlorobenzene

BS3 / SOL : uB3LYP ( 6-311+G\* : (C, H, O, N, and S) // cc-PVTZ : (Fe) ) in chlorobenzene

**Table S16.** Relative energies in kcal mol<sup>-1</sup> of UB3LYP/BS1 optimised geometries for the metabolism of melatonin by CYP1A1 through O-demethylation in the doublet and quartet spin state (model A<sub>II</sub>).

| CAL       | Energy   | State             |                      |                      | MUL |
|-----------|----------|-------------------|----------------------|----------------------|-----|
|           |          | Re <sub>All</sub> | TS1 <sub>C6,II</sub> | IM1 <sub>C6,II</sub> |     |
| BS1       | ΔE       | 0.000             | 2.467                | -23.951              | 2   |
|           | Δ(E+ZPE) | 0.000             | 3.366                | -22.025              |     |
|           | ΔG       | 0.000             | 9.349                | -16.443              |     |
| BS2       | ΔE       | 0.000             | 5.133                | -25.088              |     |
|           | Δ(E+ZPE) | 0.000             | 6.031                | -23.161              |     |
|           | ΔG       | 0.000             | 12.014               | -17.579              |     |
| BS3 / SOL | ΔE       | 0.000             | 5.568                | -20.814              |     |
|           | Δ(E+ZPE) | 0.000             | 6.466                | -18.888              |     |
|           | ΔG       | 0.000             | 12.449               | -13.306              |     |
| BS1       | ΔE       | 0.000             | 9.135                | -12.641              | 4   |
|           | Δ(E+ZPE) | 0.137             | 9.517                | -11.846              |     |
|           | ΔG       | 0.370             | 14.244               | -8.100               |     |
| BS2       | ΔE       | 0.110             | 12.382               | -14.601              |     |
|           | Δ(E+ZPE) | 0.166             | 12.685               | -13.886              |     |
|           | ΔG       | 0.399             | 17.412               | -10.140              |     |
| BS3 / SOL | ΔE       | -0.141            | 11.712               | -13.896              |     |
|           | Δ(E+ZPE) | -0.084            | 12.014               | -13.181              |     |
|           | ΔG       | 0.148             | 16.741               | -9.435               |     |

CAL : calculation method

MUL : multiplicity

BS1 : uB3LYP ( 6-31G\* : (C, H, O, N, and S)

BS2 : uB3LYP ( 6-311+G\* : (C, H, O, N, and S)

BS2 / SOL : uB3LYP ( 6-311+G\* : (C, H, O, N, and S)

**Table S17.** Group charges (doublet/quartet) of UB3LYP/BS1 optimised geometries for the metabolism of melatonin by CYP1A1 through *aromatic hydroxylation* in the doublet and quartet spin state (model A<sub>III</sub>).

| Residue group  | Composition       | Re <sub>AIII</sub> | TS <sub>C6,III</sub> | IM1 <sub>C6,III</sub> | IM2 <sub>C6,III</sub> | P <sub>C6,III</sub> |
|----------------|-------------------|--------------------|----------------------|-----------------------|-----------------------|---------------------|
| Compound I     | Fe                | 0.479 / 0.475      | 0.266 / 0.406        | 0.209 / 0.372         | 0.206 / 0.367         | 0.184 / 0.412       |
|                | O                 | -0.378 / -0.375    | -0.486 / -0.526      | -0.551 / -0.548       | -0.57 / -0.597        | -0.638 / -0.637     |
|                | Fe-O*             | 0.101 / 0.1        | -0.221 / -0.119      | -0.342 / -0.177       | -0.364 / -0.23        | -0.454 / -0.225     |
|                | Por*              | -0.187 / -0.186    | -0.482 / -0.39       | -0.57 / -0.765        | -0.32 / -0.438        | -0.486 / -0.459     |
|                | S                 | 0.052 / 0.051      | 0.023 / 0.036        | 0.03 / 0.087          | 0.028 / -0.019        | 0.119 / -0.06       |
|                | S-Me*             | 0.013 / 0.012      | -0.061 / -0.031      | -0.056 / 0.018        | -0.042 / -0.082       | 0.073 / -0.117      |
| Melatonin      | C <sub>6</sub> *  | -0.202 / -0.202    | -0.087 / -0.02       | 0.102 / 0.083         | 0.321 / 0.333         | 0.325 / 0.325       |
|                | H <sub>C6</sub> * | 0.122 / 0.122      | 0.186 / 0.164        | 0.156 / 0.159         | 0.388 / 0.405         | 0.449 / 0.426       |
|                | H-Me*             | 0.196 / 0.196      | 0.177 / 0.172        | 0.189 / 0.179         | 0.178 / 0.186         | 0.177 / 0.181       |
|                | The rest atoms*   | -0.148 / -0.147    | 0.357 / 0.112        | 0.348 / 0.37          | -0.351 / -0.302       | -0.282 / -0.305     |
| Environment*   |                   | -1.895 / -1.894    | -1.869 / -1.887      | -1.825 / -1.867       | -1.809 / -1.873       | -1.802 / -1.827     |
| <b>Total**</b> |                   | -2 / -2            | -2 / -2              | -2 / -2               | -2 / -2               | -2 / -2             |

\*\* is the summation of \*

**Table S18.** Group spin densities (doublet/quartet) of UB3LYP/BS1 optimised geometries for the metabolism of melatonin by CYP1A1 through *aromatic hydroxylation* in the doublet and quartet spin state (model A<sub>III</sub>).

| Residue group  | Composition       | Re <sub>AIII</sub> | TS <sub>C6,III</sub> | IM1 <sub>C6,III</sub> | IM2 <sub>C6,III</sub> | P <sub>C6,III</sub> |
|----------------|-------------------|--------------------|----------------------|-----------------------|-----------------------|---------------------|
| Compound I     | Fe                | 1.197 / 1.095      | 1.002 / 1.817        | 0.989 / 2.999         | 0.98 / 2.951          | 0.98 / 2.47         |
|                | O                 | 0.888 / 0.917      | 0.13 / 0.436         | 0.039 / 0.003         | 0.05 / 0.052          | 0.05 / 0.006        |
|                | Fe-O*             | 2.085 / 2.013      | 1.132 / 2.254        | 1.028 / 3.003         | 1.03 / 3.003          | 1.03 / 2.476        |
|                | Por*              | -0.361 / 0.294     | -0.094 / -0.109      | -0.08 / 0.182         | -0.08 / 0.077         | -0.08 / 0.021       |
|                | S                 | -0.709 / 0.675     | 0.019 / 0.157        | 0.046 / -0.207        | 0.055 / -0.051        | 0.055 / 0.488       |
|                | S-Me*             | -0.722 / 0.687     | 0.017 / 0.163        | 0.045 / -0.214        | 0.054 / -0.047        | 0.054 / 0.503       |
| Melatonin      | C <sub>6</sub> *  | 0 / 0              | -0.031 / 0.021       | -0.003 / -0.001       | 0.002 / 0.003         | 0.002 / -0.002      |
|                | H <sub>C6</sub> * | 0 / 0              | 0.003 / 0.013        | 0 / 0.001             | 0 / 0.001             | 0 / -0.002          |
|                | H-Me*             | 0 / -0.001         | 0 / 0.002            | 0 / 0                 | 0 / 0                 | 0 / 0               |
|                | The rest atoms*   | -0.001 / 0.006     | -0.026 / 0.651       | 0.011 / 0.03          | -0.006 / -0.037       | -0.006 / 0.004      |
| Environment*   |                   | -0.001 / 0.001     | 0 / 0.004            | 0 / 0                 | 0 / 0                 | 0 / 0               |
| <b>Total**</b> |                   | 1 / 3              | 1 / 3                | 1 / 3                 | 1 / 3                 | 1 / 3               |

\*\* is the summation of \*

**Table S19** Group charges (doublet/quartet) of UB3LYP/BS1 optimised geometries for the metabolism of melatonin by CYP1A1 through O-demethylation in the doublet and quartet spin state (model A<sub>III</sub>).

| Residue group  | Composition       | Re <sub>AIII</sub> | TS <sub>HA,III</sub> | IM1 <sub>HA,III</sub> | P <sub>Hy,III</sub> |
|----------------|-------------------|--------------------|----------------------|-----------------------|---------------------|
| Compound I     | Fe                | 0.479 / 0.475      | 0.358 / 0.401        | 0.325 / 0.334         | 0.175 / 0.423       |
|                | O                 | -0.378 / -0.375    | -0.57 / -0.578       | -0.688 / -0.687       | -0.586 / -0.585     |
|                | Fe-O*             | 0.101 / 0.1        | -0.212 / -0.177      | -0.362 / -0.353       | -0.411 / -0.162     |
|                | Por*              | -0.187 / -0.186    | -0.277 / -0.256      | -0.194 / -0.19        | -0.488 / -0.477     |
|                | S                 | 0.052 / 0.051      | 0.024 / 0.067        | 0.092 / 0.084         | 0.132 / -0.056      |
|                | S-Me*             | 0.013 / 0.012      | -0.048 / 0.024       | 0.054 / 0.046         | 0.085 / -0.116      |
| Melatonin      | C <sub>6</sub> *  | -0.202 / -0.202    | -0.192 / -0.191      | -0.22 / -0.221        | -0.223 / -0.221     |
|                | H <sub>C6</sub> * | 0.122 / 0.122      | 0.15 / 0.14          | 0.139 / 0.137         | 0.177 / 0.171       |
|                | H-Me*             | 0.196 / 0.196      | 0.381 / 0.385        | 0.418 / 0.419         | 0.442 / 0.428       |
|                | The rest atoms*   | -0.148 / -0.147    | 0.075 / -0.041       | 0.066 / 0.06          | 0.304 / 0.265       |
| Environment*   |                   | -1.895 / -1.894    | -1.878 / -1.883      | -1.9 / -1.898         | -1.886 / -1.886     |
| <b>Total**</b> |                   | -2 / -2            | -2 / -2              | -2 / -2               | -2 / -2             |

\*\* is the summation of \*

**Table S20.** Group spin densities (doublet/quartet) of UB3LYP/BS1 optimised geometries for the metabolism of melatonin by CYP1A1 through O-demethylation in the doublet and quartet spin state (model A<sub>III</sub>).

| Residue group  | Composition       | Re <sub>AIII</sub> | TS <sub>HA,III</sub> | IM1 <sub>HA,III</sub> | P <sub>Hy,III</sub> |
|----------------|-------------------|--------------------|----------------------|-----------------------|---------------------|
| Compound I     | Fe                | 1.197 / 1.095      | 1.457 / 0.858        | 0.98 / 0.856          | 1.047 / 2.505       |
|                | O                 | 0.888 / 0.917      | 0.294 / 0.62         | 0.097 / 0.169         | -0.003 / 0.011      |
|                | Fe-O*             | 2.085 / 2.013      | 1.751 / 1.478        | 1.077 / 1.025         | 1.044 / 2.516       |
|                | Por*              | -0.361 / 0.294     | -0.246 / 0.321       | -0.479 / 0.406        | -0.075 / -0.007     |
|                | S                 | -0.709 / 0.675     | -0.316 / 0.647       | -0.569 / 0.568        | 0.033 / 0.476       |
|                | S-Me*             | -0.722 / 0.687     | -0.319 / 0.659       | -0.578 / 0.576        | 0.031 / 0.491       |
| Melatonin      | C <sub>6</sub> *  | 0 / 0              | -0.009 / 0.012       | 0.022 / 0.022         | 0 / 0               |
|                | H <sub>C6</sub> * | 0 / 0              | 0 / -0.001           | -0.001 / -0.001       | 0 / 0               |
|                | H-Me*             | 0 / -0.001         | -0.026 / -0.055      | -0.005 / -0.005       | 0 / -0.001          |
|                | The rest atoms*   | -0.001 / 0.006     | -0.151 / 0.584       | 0.91 / 0.922          | 0 / 0.001           |
| Environment*   |                   | -0.001 / 0.001     | 0 / 0.001            | 0.053 / 0.055         | 0 / 0               |
| <b>Total**</b> |                   | 1 / 3              | 1 / 3                | 1 / 3                 | 1 / 3               |

\*\* is the summation of \*

**Table S21.** Group charges (doublet/quartet) of UB3LYP/BS1 optimised geometries for the metabolism of melatonin by CYP1A1 through O-demethylation in the doublet and quartet spin states (model **A<sub>III</sub>**).

| Residue group  | Composition       | IM2 <sub>Hy,III</sub> | TS <sub>A,III</sub> | P <sub>OD,III</sub> |
|----------------|-------------------|-----------------------|---------------------|---------------------|
| Compound I     | Fe                | 0 / 0.413             | 0 / 0.412           | 0 / 0.187           |
|                | O                 | 0 / -0.604            | 0 / -0.598          | 0 / -0.32           |
|                | Fe-O*             | 0 / -0.191            | 0 / -0.186          | 0 / -0.132          |
|                | Por*              | 0 / -0.667            | 0 / -0.555          | 0 / -0.485          |
|                | S                 | 0 / 0.09              | 0 / 0.025           | 0 / 0.139           |
|                | S-Me*             | 0 / 0.053             | 0 / -0.023          | 0 / 0.099           |
| Melatonin      | C <sub>6</sub> *  | 0 / -0.233            | 0 / -0.21           | 0 / -0.26           |
|                | H <sub>C6</sub> * | 0 / 0.183             | 0 / 0.176           | 0 / 0.116           |
|                | H-Me*             | 0 / 0.447             | 0 / 0.463           | 0 / 0.475           |
|                | The rest atoms*   | 0 / 0.276             | 0 / 0.305           | 0 / 0.082           |
| Environment*   |                   | 0 / -1.869            | 0 / -1.971          | 0 / -1.895          |
| <b>Total**</b> |                   | 0 / -2                | 0 / -2              | 0 / -2              |

\*\* is the summation of \*

**Table S22.** Group spin densities (doublet/quartet) of UB3LYP/BS1 optimised geometries for the metabolism of melatonin by CYP1A1 through O-demethylation in the doublet and quartet spin state (model **A<sub>III</sub>**).

| Residue group  | Composition       | IM2 <sub>Hy,III</sub> | TS <sub>A,III</sub> | P <sub>OD,III</sub> |
|----------------|-------------------|-----------------------|---------------------|---------------------|
| Compound I     | Fe                | 0 / 3.396             | 0 / 3.165           | 0 / 1.062           |
|                | O                 | 0 / 0.009             | 0 / 0.009           | 0 / 0.007           |
|                | Fe-O*             | 0 / 3.406             | 0 / 3.174           | 0 / 1.069           |
|                | Por*              | 0 / -0.017            | 0 / -0.063          | 0 / 1.911           |
|                | S                 | 0 / -0.379            | 0 / -0.113          | 0 / 0.022           |
|                | S-Me*             | 0 / -0.39             | 0 / -0.112          | 0 / 0.02            |
| Melatonin      | C <sub>6</sub> *  | 0 / 0                 | 0 / 0               | 0 / 0.001           |
|                | H <sub>C6</sub> * | 0 / 0                 | 0 / 0               | 0 / 0               |
|                | H-Me*             | 0 / 0                 | 0 / 0               | 0 / 0               |
|                | The rest atoms*   | 0 / 0.001             | 0 / 0.001           | 0 / -0.001          |
| Environment*   |                   | 0 / 0                 | 0 / 0.001           | 0 / 0               |
| <b>Total**</b> |                   | 0 / 3                 | 0 / 3               | 0 / 3               |

\*\* is the summation of \*

**Table S23.** Group charges (doublet/quartet) of UB3LYP/BS1 optimised geometries for the non-protein O-demethylation via pathways **B'**, **B''** and **B'''** in the singlet spin state.

| Residue group  | Composition      | IM2 <sub>Hy</sub>        | TS <sub>Hy</sub>         | P <sub>OD</sub>          |
|----------------|------------------|--------------------------|--------------------------|--------------------------|
| Water          | H <sub>1</sub> * | 0.152 / 0.445 / 0.409    | 0.166 / 0.438 / 0.435    | 0.143 / 0.449 / 0.451    |
|                | H <sub>2</sub> * | 0.4 / 0.397 / 0.427      | 0.365 / 0.355 / 0.399    | 0.403 / 0.396 / 0.408    |
|                | O*               | -0.792 / -0.817 / -0.819 | -0.897 / -0.896 / -0.815 | -0.807 / -0.819 / -0.832 |
| Melatonin      | O-Me*            | -0.628 / -0.644 / -0.659 | -0.59 / -0.563 / -0.641  | -0.359 / -0.39 / -0.375  |
|                | H-Me*            | 0.418 / 0.429 / 0.441    | 0.429 / 0.447 / 0.428    | 0.432 / 0.434 / 0.433    |
|                | The rest atoms*  | 0.451 / 0.18 / 0.193     | 0.527 / 0.242 / 0.184    | 0.189 / -0.092 / -0.11   |
| Environment*   |                  | 0 / 0.01 / 0.007         | 0 / -0.024 / 0.01        | 0 / 0.022 / 0.025        |
| <b>Total**</b> |                  | 0 / 0 / 0                | 0 / 0 / 0                | 0 / 0 / 0                |

\*\* is the summation of \*

**Table S24.** Group spin densities (doublet/quartet) of UB3LYP/BS1 optimised geometries for the non-protein O-demethylation via pathways **B'**, **B''** and **B'''** in the singlet spin state.

| Residue group  | Composition      | IM2 <sub>Hy</sub> | TS <sub>Hy</sub> | P <sub>OD</sub> |
|----------------|------------------|-------------------|------------------|-----------------|
| Water          | H <sub>1</sub> * | 0 / 0 / 0         | 0 / 0 / 0        | 0 / 0 / 0       |
|                | H <sub>2</sub> * | 0 / 0 / 0         | 0 / 0 / 0        | 0 / 0 / 0       |
|                | O*               | 0 / 0 / 0         | 0 / 0 / 0        | 0 / 0 / 0       |
| Melatonin      | O-Me*            | 0 / 0 / 0         | 0 / 0 / 0        | 0 / 0 / 0       |
|                | H-Me*            | 0 / 0 / 0         | 0 / 0 / 0        | 0 / 0 / 0       |
|                | The rest atoms*  | 0 / 0 / 0         | 0 / 0 / 0        | 0 / 0 / 0       |
| Environment*   |                  | 0 / 0 / 0         | 0 / 0 / 0        | 0 / 0 / 0       |
| <b>Total**</b> |                  | 0 / 0 / 0         | 0 / 0 / 0        | 0 / 0 / 0       |

**Table S25.** Imaginary frequencies (in cm<sup>-1</sup>) of the UB3LYP/BS1 optimised transition states for the metabolism of melatonin by CYP1A1 through aromatic hydroxylation and O-demethylation.

| State                                  | Imaginary frequency                      |
|----------------------------------------|------------------------------------------|
| <sup>2,4</sup> TS1 <sub>C6,III</sub>   | i428.4 (doublet), i475.9 (quartet)       |
| <sup>2,4</sup> TS1 <sub>HA,III</sub>   | i1735.2 (doublet), i1200.9 (quartet)     |
| <sup>4</sup> TS <sub>Hy,AIII</sub>     | i245.2 (quartet)                         |
| <sup>1</sup> TS <sub>B',B'',B'''</sub> | i260.7 (B'), i169.6 (B''), i132.3 (B''') |

**Table S26.** The comparison of computed bond distances  $r$  (Å) around the iron centre of CpdI and the spin densities of relating atoms from different studies. (doublet/quartet).

| Calculation method         | S complex | System                     | rFe-O       | rFe-S       | $\rho$ FeO   | $\rho$ Scys  | $\rho$ Por   |
|----------------------------|-----------|----------------------------|-------------|-------------|--------------|--------------|--------------|
| QM/MM                      | S-CH3     | A                          | 1.626/1.626 | 2.585/2.565 | 2.172/2.042  | -0.349/0.282 | -0.82/0.671  |
|                            |           | B                          | -           | 2.550/2.550 | -            | -0.390/0.370 | -            |
|                            | S-H       | A                          | 1.626/1.627 | 2.589/2.560 | 2.041/2.177  | -0.270/0.201 | -0.915/0.763 |
| QM                         | S-CH3     | A                          | 1.619/1.620 | 2.625/2.622 | 2.141/2.040  | -0.777/0.719 | -0.350/0.229 |
|                            |           | C                          | 1.629/1.629 | 2.607/2.619 | 2.100/2.030  | -0.750/0.720 | -0.340/0.240 |
|                            |           | D                          | 1.647/1.649 | 2.645/2.644 | 2.095/2.016  | -0.712/0.680 | 0.301/-0.382 |
|                            | S-H       | C                          | 1.648/1.651 | 2.600/2.581 | 2.09/2.020   | -0.590/0.540 | -0.500/0.440 |
|                            |           | CYP1A1-MEL <sup>AII</sup>  | 1.640/1.642 | 2.525/2.512 | 2.109/2.049  | -0.374/0.318 | -0.375/0.267 |
|                            |           | CYP1A1-MEL <sup>AIII</sup> | 1.626/1.629 | 2.579/2.558 | 2.095/2.018  | -0.490/0.438 | -0.604/0.533 |
|                            | S-CH2-CH3 | CYP1A1-MEL <sup>AII</sup>  | 1.634/1.635 | 2.567/2.565 | 2.104/2.042  | -0.587/0.534 | -0.210/0.115 |
| CYP1A1-MEL <sup>AIII</sup> |           | 1.619/1.620                | 2.676/2.670 | 2.085/2.013 | -0.709/0.675 | -0.361/0.294 |              |

- A Schönboom JC, Lin H, Reuter N, et al. The elusive oxidant species of cytochrome P450 enzymes: characterization by combined quantum mechanical/molecular mechanical (QM/MM) calculations. *J Am Chem Soc.* 2002;124(27):8142-8151. doi:10.1021/ja026279w
- B Bathelt CM, Zurek J, Mulholland AJ, Harvey JN. Electronic structure of compound I in human isoforms of cytochrome P450 from QM/MM modeling. *J Am Chem Soc.* 2005;127(37):12900-12908. doi:10.1021/ja0520924
- C Shaik S, Kumar D, de Visser SP, Altun A, Thiel W. Theoretical perspective on the structure and mechanism of cytochrome P450 enzymes. *Chem Rev.* 2005;105(6):2279-2328. doi:10.1021/cr030722j
- D Ali HS, Henchman RH, de Visser SP. Lignin Biodegradation by a Cytochrome P450 Enzyme: A Computational Study into Syringol Activation by GcoA. *Chemistry.* 2020;26(57):13093-13102. doi:10.1002/chem.202002203



# Cartesian Coordinates

## 2ReAll

|    |               |               |              |
|----|---------------|---------------|--------------|
| 6  | -20.425064000 | -43.506425000 | 29.090094000 |
| 6  | -21.052974000 | -42.293168000 | 33.733200000 |
| 6  | -16.266066000 | -41.814309000 | 34.249487000 |
| 6  | -15.649993000 | -42.917351000 | 29.577253000 |
| 6  | -21.006583000 | -43.282485000 | 30.328524000 |
| 6  | -22.422778000 | -43.338789000 | 30.587199000 |
| 6  | -22.603109000 | -42.997771000 | 31.894526000 |
| 6  | -21.292228000 | -42.730428000 | 32.437363000 |
| 6  | -19.795872000 | -42.032338000 | 34.271573000 |
| 6  | -19.569085000 | -41.596165000 | 35.627979000 |
| 6  | -18.220938000 | -41.482693000 | 35.780580000 |
| 6  | -17.628821000 | -41.837657000 | 34.513485000 |
| 6  | -15.681747000 | -42.085248000 | 33.018329000 |
| 6  | -14.262634000 | -42.025760000 | 32.762094000 |
| 6  | -14.091255000 | -42.329863000 | 31.445668000 |
| 6  | -15.405585000 | -42.577275000 | 30.904037000 |
| 6  | -16.906308000 | -43.165415000 | 29.045064000 |
| 6  | -17.135517000 | -43.501713000 | 27.659765000 |
| 6  | -18.478317000 | -43.671083000 | 27.521804000 |
| 6  | -19.066393000 | -43.435355000 | 28.820401000 |
| 7  | -20.327456000 | -42.938105000 | 31.476028000 |
| 7  | -18.603571000 | -42.178154000 | 33.610351000 |
| 7  | -16.357987000 | -42.428758000 | 31.877359000 |
| 7  | -18.091275000 | -43.134911000 | 29.738020000 |
| 26 | -18.354429000 | -42.515897000 | 31.639650000 |
| 1  | -21.917540000 | -42.112159000 | 34.364427000 |
| 1  | -15.605173000 | -41.535541000 | 35.064658000 |
| 1  | -14.807149000 | -42.987604000 | 28.894554000 |
| 1  | -21.087028000 | -43.749056000 | 28.264531000 |
| 6  | -16.283500000 | -35.651055000 | 28.505217000 |
| 6  | -18.099185000 | -36.937966000 | 28.853524000 |
| 6  | -19.295122000 | -37.565168000 | 29.259963000 |
| 6  | -17.635665000 | -38.779779000 | 27.283808000 |
| 6  | -17.283349000 | -37.556387000 | 27.871182000 |
| 6  | -17.446091000 | -35.713415000 | 29.246035000 |
| 6  | -19.636065000 | -38.782939000 | 28.682998000 |
| 6  | -18.815495000 | -39.379326000 | 27.696758000 |
| 7  | -16.183299000 | -36.747466000 | 27.668093000 |
| 1  | -15.374988000 | -37.016932000 | 27.108211000 |
| 6  | -17.998640000 | -34.719383000 | 30.233513000 |
| 6  | -16.954069000 | -33.834386000 | 30.937836000 |
| 7  | -17.586061000 | -32.925196000 | 31.889577000 |
| 6  | -17.840758000 | -31.636433000 | 31.631442000 |
| 8  | -17.503459000 | -31.060077000 | 30.568040000 |
| 6  | -18.568060000 | -30.875665000 | 32.724486000 |
| 1  | -17.970752000 | -33.321529000 | 32.758990000 |
| 8  | -20.773952000 | -39.493833000 | 29.003416000 |
| 6  | -21.346114000 | -39.249798000 | 30.278664000 |
| 1  | -15.515885000 | -34.888871000 | 28.490399000 |
| 1  | -19.918474000 | -37.109717000 | 30.021557000 |
| 1  | -16.997302000 | -39.258869000 | 26.547122000 |
| 1  | -19.121758000 | -40.339226000 | 27.293182000 |
| 1  | -18.561797000 | -35.257899000 | 31.007040000 |
| 1  | -18.727102000 | -34.054750000 | 29.744586000 |
| 1  | -16.229930000 | -34.451484000 | 31.481032000 |
| 1  | -16.409004000 | -33.222990000 | 30.214360000 |
| 1  | -17.942704000 | -30.035888000 | 33.046459000 |
| 1  | -18.822976000 | -31.515194000 | 33.570702000 |
| 1  | -19.490490000 | -30.455532000 | 32.307872000 |
| 1  | -22.106247000 | -40.023087000 | 30.419668000 |
| 1  | -21.829969000 | -38.264082000 | 30.332960000 |
| 1  | -20.588274000 | -39.332436000 | 31.066019000 |
| 6  | -19.308362000 | -45.618966000 | 33.516742000 |
| 16 | -18.361472000 | -45.164918000 | 32.019959000 |
| 1  | -19.693058000 | -44.702978000 | 33.973871000 |
| 1  | -18.576309000 | -46.034786000 | 34.223471000 |
| 6  | -16.791838000 | -40.826419000 | 21.535024000 |
| 6  | -15.267308000 | -40.809514000 | 21.547090000 |
| 8  | -14.621326000 | -41.854570000 | 21.370428000 |
| 6  | -17.412589000 | -41.666083000 | 22.674517000 |
| 6  | -18.887997000 | -41.975281000 | 22.347253000 |
| 6  | -17.245285000 | -40.962618000 | 24.028996000 |
| 6  | -19.578368000 | -42.920431000 | 23.337625000 |
| 1  | -17.194863000 | -39.805437000 | 21.563333000 |
| 1  | -16.866650000 | -42.619689000 | 22.704074000 |
| 1  | -19.449343000 | -41.030173000 | 22.297177000 |
| 1  | -18.940446000 | -42.417193000 | 21.341497000 |
| 1  | -17.588339000 | -41.593261000 | 24.855854000 |
| 1  | -16.202923000 | -40.704747000 | 24.242831000 |
| 1  | -17.833754000 | -40.034978000 | 24.058380000 |
| 1  | -20.598498000 | -43.153328000 | 23.009643000 |
| 1  | -19.031918000 | -43.868997000 | 23.422854000 |
| 1  | -19.645673000 | -42.482831000 | 24.338989000 |
| 7  | -14.691104000 | -39.595655000 | 21.697186000 |
| 6  | -13.256519000 | -39.362599000 | 21.788543000 |
| 6  | -12.885952000 | -38.863579000 | 23.185728000 |
| 8  | -13.710017000 | -37.756127000 | 23.505329000 |
| 1  | -15.249829000 | -38.831789000 | 22.058940000 |

|   |               |               |              |
|---|---------------|---------------|--------------|
| 1 | -12.979337000 | -38.609441000 | 21.038778000 |
| 1 | -13.035220000 | -39.671065000 | 23.910400000 |
| 1 | -11.817917000 | -38.584588000 | 23.188542000 |
| 1 | -13.960840000 | -37.864667000 | 24.461605000 |
| 6 | -12.565445000 | -42.956089000 | 24.593026000 |
| 6 | -11.993147000 | -43.880774000 | 23.524076000 |
| 8 | -11.231221000 | -44.803853000 | 23.812788000 |
| 6 | -13.533778000 | -43.697093000 | 25.531066000 |
| 8 | -13.924609000 | -42.911430000 | 26.643465000 |
| 1 | -11.727153000 | -42.586133000 | 25.194407000 |
| 1 | -14.408915000 | -44.034822000 | 24.949807000 |
| 1 | -13.037906000 | -44.591065000 | 25.922595000 |
| 1 | -14.174289000 | -42.004255000 | 26.329330000 |
| 7 | -12.384778000 | -43.608664000 | 22.243585000 |
| 6 | -11.970647000 | -44.429019000 | 21.121035000 |
| 6 | -13.152711000 | -44.885281000 | 20.237776000 |
| 6 | -14.114620000 | -45.826870000 | 20.929101000 |
| 6 | -13.888153000 | -47.210044000 | 20.934688000 |
| 6 | -15.242079000 | -45.331416000 | 21.599599000 |
| 6 | -14.759140000 | -48.078388000 | 21.594415000 |
| 6 | -16.114585000 | -46.197532000 | 22.261766000 |
| 6 | -15.876800000 | -47.573531000 | 22.262297000 |
| 1 | -13.071166000 | -42.877537000 | 22.066817000 |
| 1 | -11.437958000 | -45.286453000 | 21.540779000 |
| 1 | -13.691172000 | -43.995321000 | 19.890702000 |
| 1 | -12.729476000 | -45.372712000 | 19.348598000 |
| 1 | -13.017559000 | -47.610164000 | 20.417585000 |
| 1 | -15.424322000 | -44.259802000 | 21.597180000 |
| 1 | -14.564824000 | -49.148519000 | 21.587509000 |
| 1 | -16.982171000 | -45.795514000 | 22.779836000 |
| 1 | -16.556021000 | -48.246548000 | 22.779738000 |
| 6 | -27.314162000 | -41.382688000 | 32.847945000 |
| 6 | -27.729614000 | -40.984775000 | 31.436519000 |
| 8 | -28.545244000 | -41.656288000 | 30.779822000 |
| 6 | -27.301194000 | -42.910661000 | 33.039897000 |
| 8 | -28.588341000 | -43.468395000 | 32.820585000 |
| 6 | -26.851309000 | -43.288619000 | 34.446431000 |
| 1 | -26.330601000 | -40.969988000 | 33.092212000 |
| 1 | -26.578114000 | -43.332847000 | 32.317026000 |
| 1 | -28.880039000 | -43.063724000 | 31.975756000 |
| 1 | -26.841628000 | -44.378454000 | 34.558134000 |
| 1 | -25.848490000 | -42.897755000 | 34.650596000 |
| 1 | -27.546838000 | -42.877812000 | 35.188263000 |
| 7 | -27.170405000 | -39.852169000 | 30.951124000 |
| 6 | -27.502299000 | -39.347307000 | 29.626197000 |
| 6 | -26.621207000 | -39.910899000 | 28.490047000 |
| 6 | -25.144853000 | -39.502871000 | 28.656924000 |
| 6 | -27.201253000 | -39.475762000 | 27.135851000 |
| 6 | -24.169189000 | -40.224235000 | 27.718398000 |
| 1 | -26.508907000 | -39.329799000 | 31.530329000 |
| 1 | -27.419124000 | -38.252615000 | 29.651181000 |
| 1 | -26.688463000 | -41.006088000 | 28.558393000 |
| 1 | -25.056547000 | -38.414756000 | 28.509648000 |
| 1 | -24.842292000 | -39.693787000 | 29.694560000 |
| 1 | -26.641187000 | -39.904289000 | 26.298291000 |
| 1 | -28.246303000 | -39.793350000 | 27.032972000 |
| 1 | -27.171051000 | -38.382491000 | 27.028288000 |
| 1 | -23.133049000 | -39.936689000 | 27.926156000 |
| 1 | -24.243897000 | -41.312677000 | 27.842480000 |
| 1 | -24.370102000 | -39.997175000 | 26.664728000 |
| 6 | -26.026093000 | -36.184578000 | 31.902083000 |
| 6 | -25.143198000 | -37.098303000 | 32.757763000 |
| 8 | -25.269572000 | -38.340360000 | 32.643387000 |
| 6 | -25.633947000 | -34.702852000 | 31.787669000 |
| 6 | -24.353913000 | -34.433058000 | 30.959686000 |
| 6 | -24.644475000 | -34.483848000 | 29.451990000 |
| 6 | -23.711383000 | -33.098595000 | 31.364408000 |
| 1 | -26.064068000 | -36.646937000 | 30.909170000 |
| 1 | -26.472374000 | -34.159535000 | 31.328678000 |
| 1 | -25.531836000 | -34.268915000 | 32.791617000 |
| 1 | -23.626567000 | -35.223723000 | 31.187604000 |
| 1 | -23.722296000 | -34.368437000 | 28.871288000 |
| 1 | -25.104107000 | -35.433723000 | 29.151619000 |
| 1 | -25.328428000 | -33.674890000 | 29.159962000 |
| 1 | -22.844103000 | -32.872257000 | 30.733408000 |
| 1 | -24.424944000 | -32.268559000 | 31.263961000 |
| 1 | -23.363945000 | -33.138399000 | 32.402780000 |
| 7 | -24.309789000 | -36.511128000 | 33.614356000 |
| 6 | -23.339386000 | -37.133723000 | 34.515287000 |
| 6 | -22.085778000 | -36.235186000 | 34.530144000 |
| 8 | -22.571345000 | -34.901750000 | 34.609063000 |
| 6 | -21.201224000 | -36.435408000 | 33.295117000 |
| 1 | -24.218697000 | -35.499428000 | 33.633941000 |
| 1 | -23.120585000 | -38.151472000 | 34.186923000 |
| 1 | -21.502443000 | -36.479695000 | 35.429260000 |
| 1 | -21.816268000 | -34.332123000 | 34.958008000 |
| 1 | -20.396501000 | -35.693727000 | 33.307165000 |
| 1 | -20.758626000 | -37.439948000 | 33.281650000 |
| 1 | -21.783461000 | -36.300559000 | 32.373647000 |
| 6 | -17.330208000 | -24.968695000 | 31.756757000 |
| 6 | -15.914121000 | -24.827715000 | 31.189727000 |
| 8 | -15.667368000 | -24.062541000 | 30.262294000 |
| 6 | -18.165119000 | -25.994885000 | 30.972001000 |



|    |               |               |              |   |               |               |              |
|----|---------------|---------------|--------------|---|---------------|---------------|--------------|
| 1  | -18.821127000 | -31.517057000 | 33.572064000 | 8 | -25.275252000 | -38.337289000 | 32.658141000 |
| 1  | -19.492042000 | -30.460200000 | 32.308797000 | 6 | -25.638633000 | -34.700660000 | 31.797052000 |
| 1  | -22.108210000 | -40.027172000 | 30.429475000 | 6 | -24.358754000 | -34.431054000 | 30.968715000 |
| 1  | -21.826617000 | -38.268660000 | 30.349131000 | 6 | -24.649679000 | -34.482573000 | 29.461094000 |
| 1  | -20.585520000 | -39.343518000 | 31.073298000 | 6 | -23.716353000 | -33.096321000 | 31.372656000 |
| 6  | -19.316443000 | -45.611714000 | 33.501630000 | 1 | -26.067312000 | -36.645691000 | 30.920117000 |
| 16 | -18.357644000 | -45.153754000 | 32.013430000 | 1 | -26.477304000 | -34.158040000 | 31.337687000 |
| 1  | -19.703907000 | -44.697041000 | 33.959027000 | 1 | -25.536636000 | -34.265874000 | 32.800644000 |
| 1  | -18.589870000 | -46.030143000 | 34.212452000 | 1 | -23.631249000 | -35.221498000 | 31.196866000 |
| 6  | -16.779892000 | -40.831597000 | 21.528399000 | 1 | -23.727691000 | -34.367094000 | 28.880100000 |
| 6  | -15.255513000 | -40.809985000 | 21.543306000 | 1 | -25.109087000 | -35.432724000 | 29.161242000 |
| 8  | -14.606064000 | -41.853250000 | 21.369079000 | 1 | -25.333984000 | -33.673969000 | 29.168915000 |
| 6  | -17.400127000 | -41.667186000 | 22.671244000 | 1 | -22.849208000 | -32.870219000 | 30.741385000 |
| 6  | -18.874072000 | -41.982316000 | 22.342930000 | 1 | -24.430027000 | -32.266415000 | 31.271914000 |
| 6  | -17.237229000 | -40.956279000 | 24.022374000 | 1 | -23.368727000 | -33.135559000 | 32.410982000 |
| 6  | -19.563451000 | -42.924804000 | 23.336553000 | 7 | -24.312479000 | -36.506806000 | 33.623887000 |
| 1  | -17.186040000 | -39.811705000 | 21.550756000 | 6 | -23.342368000 | -37.128017000 | 34.526057000 |
| 1  | -16.851504000 | -42.619082000 | 22.706754000 | 6 | -22.087760000 | -36.230845000 | 34.538495000 |
| 1  | -19.438107000 | -41.039114000 | 22.287288000 | 8 | -22.571582000 | -34.896728000 | 34.616511000 |
| 1  | -18.923442000 | -42.429223000 | 21.339241000 | 6 | -21.204809000 | -36.433609000 | 33.302678000 |
| 1  | -17.582658000 | -41.582574000 | 24.851557000 | 1 | -24.221136000 | -35.495109000 | 33.641599000 |
| 1  | -16.195685000 | -40.697036000 | 24.238445000 | 1 | -23.124612000 | -38.146764000 | 34.200084000 |
| 1  | -17.826269000 | -40.028761000 | 24.044562000 | 1 | -21.503728000 | -36.475027000 | 35.437243000 |
| 1  | -20.582172000 | -43.162504000 | 23.007645000 | 1 | -21.815487000 | -34.327664000 | 34.964216000 |
| 1  | -19.014192000 | -43.871221000 | 23.427506000 | 1 | -20.399398000 | -35.692638000 | 33.312712000 |
| 1  | -19.634143000 | -42.482583000 | 24.335656000 | 1 | -20.763084000 | -37.438561000 | 33.290230000 |
| 7  | -14.683120000 | -39.594170000 | 21.693148000 | 1 | -21.788023000 | -36.299614000 | 32.381683000 |
| 6  | -13.249338000 | -39.357706000 | 21.788624000 | 6 | -17.337665000 | -24.971779000 | 31.750822000 |
| 6  | -12.883223000 | -38.860577000 | 23.187531000 | 6 | -15.922817000 | -24.828891000 | 31.181173000 |
| 8  | -13.710231000 | -37.755135000 | 23.506696000 | 8 | -15.679083000 | -24.064355000 | 30.252421000 |
| 1  | -15.244788000 | -38.831920000 | 22.053775000 | 6 | -18.172474000 | -25.999413000 | 30.967797000 |
| 1  | -12.972218000 | -38.602294000 | 21.041133000 | 6 | -17.700042000 | -27.443216000 | 31.180922000 |
| 1  | -13.032857000 | -39.669487000 | 23.910563000 | 8 | -16.903434000 | -27.732076000 | 32.090550000 |
| 1  | -11.815694000 | -38.579648000 | 23.193432000 | 7 | -18.189178000 | -28.364107000 | 30.334076000 |
| 1  | -13.961385000 | -37.864398000 | 24.462730000 | 1 | -17.313214000 | -25.258686000 | 32.806521000 |
| 6  | -12.561003000 | -42.958217000 | 24.593666000 | 1 | -19.222382000 | -25.935772000 | 31.285492000 |
| 6  | -11.986301000 | -43.882907000 | 23.525994000 | 1 | -18.153063000 | -25.758176000 | 29.897691000 |
| 8  | -11.227388000 | -44.807809000 | 23.816743000 | 1 | -18.836666000 | -28.097450000 | 29.606272000 |
| 6  | -13.530673000 | -43.699403000 | 25.530121000 | 1 | -17.934488000 | -29.370077000 | 30.437927000 |
| 8  | -13.922962000 | -42.913955000 | 26.642130000 | 7 | -14.981328000 | -25.619498000 | 31.785132000 |
| 1  | -11.723980000 | -42.587721000 | 25.196555000 | 6 | -13.658529000 | -25.800210000 | 31.215202000 |
| 1  | -14.405040000 | -44.036915000 | 24.947566000 | 6 | -13.434128000 | -27.037312000 | 30.319225000 |
| 1  | -13.035490000 | -44.593491000 | 25.922159000 | 8 | -12.433980000 | -27.079370000 | 29.605864000 |
| 1  | -14.172314000 | -42.006795000 | 26.328130000 | 1 | -15.352226000 | -26.336290000 | 32.400103000 |
| 7  | -12.372140000 | -43.608426000 | 22.244275000 | 1 | -13.445174000 | -24.926456000 | 30.597900000 |
| 6  | -11.954820000 | -44.427806000 | 21.122235000 | 7 | -14.347302000 | -28.036813000 | 30.405955000 |
| 6  | -13.134419000 | -44.883459000 | 20.235278000 | 6 | -14.286638000 | -29.216575000 | 29.549432000 |
| 6  | -14.098385000 | -45.825464000 | 20.923164000 | 6 | -14.940892000 | -28.963105000 | 28.173252000 |
| 6  | -13.872503000 | -47.208733000 | 20.927818000 | 6 | -14.934652000 | -30.178565000 | 27.271295000 |
| 6  | -15.227363000 | -45.330282000 | 21.591306000 | 6 | -15.817617000 | -31.246389000 | 27.502563000 |
| 6  | -14.745524000 | -48.077416000 | 21.584411000 | 6 | -14.048734000 | -30.265008000 | 26.189098000 |
| 6  | -16.101952000 | -46.196744000 | 22.250268000 | 6 | -15.818688000 | -32.362123000 | 26.663049000 |
| 6  | -15.864703000 | -47.572841000 | 22.249949000 | 6 | -14.047775000 | -31.381056000 | 25.348258000 |
| 1  | -13.056959000 | -42.876259000 | 22.065869000 | 6 | -14.935805000 | -32.433016000 | 25.581391000 |
| 1  | -11.423191000 | -45.285480000 | 21.542821000 | 1 | -15.162460000 | -27.938938000 | 31.002609000 |
| 1  | -13.671844000 | -43.993150000 | 19.887470000 | 1 | -14.803555000 | -30.031742000 | 30.064378000 |
| 1  | -12.708836000 | -45.370192000 | 19.346836000 | 1 | -15.973182000 | -28.633189000 | 28.346903000 |
| 1  | -13.000757000 | -47.608678000 | 20.412524000 | 1 | -14.409100000 | -28.133696000 | 27.693588000 |
| 1  | -15.409118000 | -44.258585000 | 21.589565000 | 1 | -16.502294000 | -31.207577000 | 28.347943000 |
| 1  | -14.551595000 | -49.147613000 | 21.576879000 | 1 | -13.358350000 | -29.445100000 | 26.000598000 |
| 1  | -16.970760000 | -45.794939000 | 22.766456000 | 1 | -16.508373000 | -33.179725000 | 26.855467000 |
| 1  | -16.545542000 | -48.246151000 | 22.764874000 | 1 | -13.358152000 | -31.424997000 | 24.508246000 |
| 6  | -27.312522000 | -41.384498000 | 32.857525000 | 1 | -14.941791000 | -33.301144000 | 24.927312000 |
| 6  | -27.729858000 | -40.984393000 | 31.447279000 | 6 | -18.546847000 | -34.580043000 | 37.618341000 |
| 8  | -28.544661000 | -41.656165000 | 30.789788000 | 6 | -18.455190000 | -36.066418000 | 37.260114000 |
| 6  | -27.295479000 | -42.912905000 | 33.045681000 | 8 | -19.389474000 | -36.850553000 | 37.425280000 |
| 8  | -28.581474000 | -43.473181000 | 32.826175000 | 6 | -18.290880000 | -33.621619000 | 36.437312000 |
| 6  | -26.843308000 | -43.293320000 | 34.450812000 | 6 | -19.391843000 | -33.732077000 | 35.355403000 |
| 1  | -26.329878000 | -40.969803000 | 33.102032000 | 8 | -20.573760000 | -33.678082000 | 35.793919000 |
| 1  | -26.572054000 | -43.331447000 | 32.321038000 | 8 | -19.034643000 | -33.863054000 | 34.150785000 |
| 1  | -28.874905000 | -43.067170000 | 31.982583000 | 1 | -19.556578000 | -34.407959000 | 37.994297000 |
| 1  | -26.831316000 | -44.383403000 | 34.559787000 | 1 | -18.302120000 | -32.593250000 | 36.824893000 |
| 1  | -25.841034000 | -42.900995000 | 34.654849000 | 1 | -17.308359000 | -33.782755000 | 35.980218000 |
| 1  | -27.538832000 | -42.885745000 | 35.194431000 | 7 | -17.240098000 | -36.459536000 | 36.780341000 |
| 7  | -27.173183000 | -39.849737000 | 30.963805000 | 6 | -16.970682000 | -37.772587000 | 36.225263000 |
| 6  | -27.506705000 | -39.343055000 | 29.639959000 | 6 | -16.250814000 | -37.637939000 | 34.875266000 |
| 6  | -26.626364000 | -39.904217000 | 28.502012000 | 8 | -15.110332000 | -36.813357000 | 35.130021000 |
| 6  | -25.149919000 | -39.496184000 | 28.668311000 | 6 | -17.145975000 | -37.075659000 | 33.771013000 |
| 6  | -27.207697000 | -39.466614000 | 27.149172000 | 1 | -16.530375000 | -35.769193000 | 36.570373000 |
| 6  | -24.175092000 | -40.215149000 | 27.727042000 | 1 | -17.920851000 | -38.302259000 | 36.122365000 |
| 1  | -26.512763000 | -39.326881000 | 31.543845000 | 1 | -15.919102000 | -38.647806000 | 34.576582000 |
| 1  | -27.424244000 | -38.248358000 | 29.666640000 | 1 | -14.815837000 | -36.398543000 | 34.289052000 |
| 1  | -26.693274000 | -40.999539000 | 28.568287000 | 1 | -16.571865000 | -36.953822000 | 32.846043000 |
| 1  | -25.062010000 | -38.407701000 | 28.523518000 | 1 | -17.970836000 | -37.766691000 | 33.562677000 |
| 1  | -24.846264000 | -39.689566000 | 29.705163000 | 1 | -17.568841000 | -36.103544000 | 34.046649000 |
| 1  | -26.648364000 | -39.893569000 | 26.310321000 | 6 | -12.863184000 | -34.908241000 | 30.907629000 |
| 1  | -28.252823000 | -39.784074000 | 27.046632000 | 6 | -13.193812000 | -35.885604000 | 32.023502000 |
| 1  | -27.177656000 | -38.373140000 | 27.043588000 | 8 | -14.111385000 | -35.632251000 | 32.818815000 |
| 1  | -23.138668000 | -39.928385000 | 27.934552000 | 1 | -12.852435000 | -33.895567000 | 31.319893000 |
| 1  | -24.249811000 | -41.303886000 | 27.848432000 | 1 | -13.661527000 | -34.948457000 | 30.158391000 |
| 1  | -24.377059000 | -39.985432000 | 26.674141000 | 7 | -12.434769000 | -37.001957000 | 32.060715000 |
| 6  | -26.030187000 | -36.182446000 | 31.912656000 | 6 | -12.628155000 | -38.091286000 | 33.010356000 |
| 6  | -25.147500000 | -37.095119000 | 32.769685000 | 6 | -11.283324000 | -38.651821000 | 33.477136000 |

1 -11.770966000 -37.159268000 31.297805000  
1 -13.224474000 -38.891216000 32.546287000  
1 -11.438989000 -39.497107000 34.158046000  
1 -10.685282000 -39.003808000 32.628190000  
1 -10.704013000 -37.886475000 34.005419000  
6 -9.842714000 -36.815288000 27.637857000  
6 -10.882525000 -37.398600000 28.600570000  
8 -10.624545000 -37.440242000 29.816177000  
6 -10.292331000 -36.368420000 26.236480000  
6 -11.253454000 -35.161120000 26.171200000  
6 -10.618769000 -33.878772000 26.731148000  
6 -11.729265000 -34.947683000 24.725777000  
1 -9.361521000 -35.994332000 28.178842000  
1 -9.388900000 -36.118162000 25.660657000  
1 -10.745602000 -37.217562000 25.705786000  
1 -12.138851000 -35.389893000 26.780997000  
1 -11.322520000 -33.041156000 26.666814000  
1 -10.327778000 -33.982323000 27.782697000  
1 -9.720061000 -33.605941000 26.160021000  
1 -12.397866000 -34.081112000 24.664408000  
1 -10.875106000 -34.755568000 24.060504000  
1 -12.272881000 -35.819121000 24.342041000  
7 -12.005059000 -37.899524000 28.055031000  
6 -13.088037000 -38.547968000 28.790244000  
6 -13.668287000 -39.715143000 27.985623000  
6 -14.068782000 -39.383970000 26.534413000  
8 -14.016929000 -38.158440000 26.169994000  
8 -14.402257000 -40.342656000 25.795670000  
1 -12.242462000 -37.714816000 27.085813000  
1 -13.875046000 -37.818229000 29.014324000  
1 -12.960031000 -40.551386000 27.940686000  
1 -14.560065000 -40.096037000 28.498977000  
8 -18.497911000 -40.941284000 31.257233000  
1 -13.513449000 -41.786658000 33.503779000  
1 -13.173550000 -42.388514000 30.874117000  
1 -20.350517000 -41.392839000 36.348505000  
1 -17.665055000 -41.178498000 36.655691000  
1 -23.526999000 -42.899238000 32.447455000  
1 -23.173393000 -43.584302000 29.844727000  
1 -19.040092000 -43.917743000 26.626687000  
1 -16.341619000 -43.565220000 26.925458000  
6 -20.443774000 -46.608153000 33.229663000  
1 -20.058907000 -47.527655000 32.775269000  
1 -20.956230000 -46.873693000 34.164497000  
1 -21.183002000 -46.177854000 32.546390000  
1 -16.330377000 -38.347488000 36.912303000  
1 -23.776937000 -37.174157000 35.532646000  
1 -27.046334000 -36.274765000 32.321121000  
1 -28.042134000 -40.959247000 33.561795000  
1 -28.553002000 -39.597704000 29.443971000  
1 -11.243743000 -43.871898000 20.491324000  
1 -13.069879000 -42.093381000 24.155658000  
1 -17.061931000 -41.271627000 20.562716000  
1 -12.731161000 -40.288595000 21.548505000  
1 -12.684192000 -38.902329000 29.740822000  
1 -9.069816000 -37.590666000 27.535684000  
1 -11.908165000 -35.124011000 30.422221000  
1 -13.205588000 -37.710950000 33.855306000  
1 -17.830562000 -34.375355000 38.428086000  
1 -13.236589000 -29.490858000 29.417875000  
1 -17.812017000 -23.989918000 31.665962000  
1 -12.909264000 -25.835285000 32.015548000  
8 -23.924146000 -40.567107000 33.670309000  
1 -24.418773000 -39.743164000 33.464965000  
1 -23.324083000 -40.656508000 32.914078000

2TS1c6,III

6 -20.102778000 -43.695477000 28.633857000  
6 -20.635194000 -42.255451000 33.227511000  
6 -15.833821000 -42.035009000 33.778340000  
6 -15.292369000 -43.556252000 29.211701000  
6 -20.670253000 -43.319814000 29.846414000  
6 -22.091070000 -43.282678000 30.112464000  
6 -22.237693000 -42.882416000 31.405613000  
6 -20.902823000 -42.673686000 31.927831000  
6 -19.371285000 -42.051400000 33.773129000  
6 -19.132815000 -41.570481000 35.117997000  
6 -17.782429000 -41.500495000 35.272515000  
6 -17.198273000 -41.939574000 34.023214000  
6 -15.262834000 -42.468282000 32.584201000  
6 -13.840223000 -42.599603000 32.355199000  
6 -13.690814000 -43.045875000 31.076661000  
6 -15.022221000 -43.177156000 30.523963000  
6 -16.558606000 -43.676417000 28.650483000  
6 -16.791765000 -44.112756000 27.292387000  
6 -18.143086000 -44.168749000 27.127068000  
6 -18.735229000 -43.755205000 28.380086000  
7 -19.971029000 -42.941892000 30.961876000  
7 -18.184125000 -42.272343000 33.133215000  
7 -15.955452000 -42.836432000 31.463980000  
7 -17.753622000 -43.442485000 29.285357000  
26 -17.970116000 -42.852646000 31.198151000  
1 -21.486039000 -42.084005000 33.881296000

1 -15.160143000 -41.760025000 34.584993000  
1 -14.450528000 -43.772044000 28.559545000  
1 -20.775807000 -43.978561000 27.829574000  
6 -16.022711000 -36.455945000 29.320393000  
6 -17.895474000 -37.581658000 29.815190000  
6 -19.185545000 -38.040621000 30.190565000  
6 -17.259141000 -39.778002000 28.910885000  
6 -16.967317000 -38.464480000 29.150885000  
6 -17.276069000 -36.316055000 29.927816000  
6 -19.509170000 -39.350601000 29.931167000  
6 -18.523638000 -40.297884000 29.394069000  
7 -15.824811000 -37.717045000 28.867454000  
1 -15.009346000 -38.027297000 28.314849000  
6 -17.871327000 -35.089536000 30.563726000  
6 -16.851951000 -34.118673000 31.192941000  
7 -17.532027000 -33.052309000 31.914715000  
6 -17.920029000 -31.909868000 31.329386000  
8 -17.640414000 -31.616614000 30.142448000  
6 -18.717705000 -30.960102000 32.202536000  
1 -17.924521000 -33.273422000 32.843423000  
8 -20.717153000 -39.904496000 30.125834000  
6 -21.744636000 -39.110378000 30.708945000  
1 -15.256398000 -35.705196000 29.177364000  
1 -19.889627000 -37.355175000 30.645554000  
1 -16.569819000 -40.459105000 28.423284000  
1 -18.935208000 -41.162486000 28.889110000  
1 -18.567757000 -35.401869000 31.350813000  
1 -18.467595000 -34.524907000 29.832586000  
1 -16.196359000 -34.648622000 31.892060000  
1 -16.229782000 -33.657875000 30.420436000  
1 -18.157663000 -30.025178000 32.313664000  
1 -18.948356000 -31.394786000 33.176711000  
1 -19.655821000 -30.717303000 31.691473000  
1 -22.615696000 -39.759065000 30.785520000  
1 -21.983290000 -38.247514000 30.074317000  
1 -21.452630000 -38.755983000 31.702684000  
6 -17.211670000 -45.478916000 33.372307000  
16 -18.013890000 -45.142811000 31.751206000  
1 -16.513460000 -44.669590000 33.598465000  
1 -16.614447000 -46.390622000 33.241365000  
6 -17.307974000 -39.570961000 22.669100000  
6 -15.809972000 -39.599488000 22.390860000  
8 -15.288599000 -40.560365000 21.804591000  
6 -17.790139000 -40.716295000 23.586496000  
6 -19.328615000 -40.811730000 23.528544000  
6 -17.266329000 -40.537953000 25.019333000  
6 -19.922253000 -42.023787000 24.255406000  
1 -17.608060000 -38.603214000 23.092906000  
1 -17.377845000 -41.649439000 23.177766000  
1 -19.759762000 -39.889132000 23.945937000  
1 -19.640006000 -40.844449000 22.474167000  
1 -17.512464000 -41.401371000 25.645756000  
1 -16.178090000 -40.421936000 25.057451000  
1 -17.713637000 -39.648336000 25.485557000  
1 -21.011693000 -42.055731000 24.134629000  
1 -19.515600000 -42.960347000 23.852054000  
1 -19.708143000 -42.006370000 25.328686000  
7 -15.121146000 -38.497370000 22.767701000  
6 -13.679167000 -38.339933000 22.648839000  
6 -13.022461000 -38.331868000 24.028353000  
8 -13.661724000 -37.356270000 24.837783000  
1 -15.553750000 -37.856659000 23.421171000  
1 -13.474761000 -37.391957000 22.133604000  
1 -13.120703000 -39.322123000 24.486152000  
1 -11.949239000 -38.106598000 23.908436000  
1 -13.769029000 -37.766308000 25.736922000  
6 -12.678681000 -42.656215000 24.014743000  
6 -12.414671000 -43.192526000 22.612270000  
8 -11.664514000 -44.149570000 22.419061000  
6 -13.365967000 -43.699850000 24.912920000  
8 -13.411240000 -43.303755000 26.271062000  
1 -11.708657000 -42.413851000 24.464979000  
1 -14.375517000 -43.905701000 24.516154000  
1 -12.800432000 -44.635871000 24.867191000  
1 -13.732010000 -42.372073000 26.318164000  
7 -13.058611000 -42.534259000 21.602641000  
6 -12.941247000 -42.944528000 20.216260000  
6 -14.308880000 -43.086729000 19.512436000  
6 -15.173629000 -44.201145000 20.060443000  
6 -15.073094000 -45.504702000 19.555481000  
6 -16.078383000 -43.956630000 21.103376000  
6 -15.850756000 -46.539624000 20.077372000  
6 -16.856068000 -44.990098000 21.629348000  
6 -17.645718000 -46.285147000 21.118650000  
1 -13.713209000 -41.785739000 21.820093000  
1 -12.396772000 -43.892489000 20.215787000  
1 -14.841357000 -42.131441000 19.592293000  
1 -14.113335000 -43.258138000 18.444961000  
1 -14.375971000 -45.710665000 18.744912000  
1 -16.164001000 -42.947088000 21.496860000  
1 -15.757287000 -47.544407000 19.671509000  
1 -17.549182000 -44.782649000 22.441167000  
1 -17.351030000 -47.089282000 21.529657000

|   |               |               |              |   |               |               |              |
|---|---------------|---------------|--------------|---|---------------|---------------|--------------|
| 6 | -27.005352000 | -40.872711000 | 32.666434000 | 1 | -14.586392000 | -35.002927000 | 25.227542000 |
| 6 | -27.385436000 | -40.529429000 | 31.231230000 | 6 | -18.718835000 | -34.211812000 | 37.700900000 |
| 8 | -28.346139000 | -41.069726000 | 30.656004000 | 6 | -18.717760000 | -35.719648000 | 37.431398000 |
| 6 | -27.287357000 | -42.349807000 | 33.001994000 | 8 | -19.718802000 | -36.421000000 | 37.576260000 |
| 8 | -28.668594000 | -42.651660000 | 32.862593000 | 6 | -18.368026000 | -33.344456000 | 36.475154000 |
| 6 | -26.867917000 | -42.684390000 | 34.428429000 | 6 | -19.445125000 | -33.440600000 | 35.369330000 |
| 1 | -25.952433000 | -40.641093000 | 32.855440000 | 8 | -20.635529000 | -33.324287000 | 35.765132000 |
| 1 | -26.692352000 | -42.971234000 | 32.307852000 | 8 | -19.058963000 | -33.624104000 | 34.178199000 |
| 1 | -28.906161000 | -42.277679000 | 31.988053000 | 1 | -19.725086000 | -33.953075000 | 38.033782000 |
| 1 | -27.075737000 | -43.738438000 | 34.642518000 | 1 | -18.314069000 | -32.296525000 | 36.802320000 |
| 1 | -25.799376000 | -42.493667000 | 34.574384000 | 1 | -17.389018000 | -33.601603000 | 36.056854000 |
| 1 | -27.435024000 | -42.074502000 | 35.142034000 | 7 | -17.509707000 | -36.230618000 | 37.055447000 |
| 7 | -26.621075000 | -39.592365000 | 30.620641000 | 6 | -17.306871000 | -37.600793000 | 36.619961000 |
| 6 | -26.902539000 | -39.147676000 | 29.262584000 | 6 | -16.532050000 | -37.632122000 | 35.295953000 |
| 6 | -26.357382000 | -40.077405000 | 28.156370000 | 8 | -15.343119000 | -36.871516000 | 35.529786000 |
| 6 | -24.827574000 | -40.223932000 | 28.244422000 | 6 | -17.339755000 | -37.100505000 | 34.112215000 |
| 6 | -26.824455000 | -39.559683000 | 26.787933000 | 1 | -16.735521000 | -35.610186000 | 36.855996000 |
| 6 | -24.223138000 | -41.264027000 | 27.293648000 | 1 | -18.286579000 | -38.073958000 | 36.522381000 |
| 1 | -25.865766000 | -39.143337000 | 31.141639000 | 1 | -16.268348000 | -38.683501000 | 35.091818000 |
| 1 | -26.471245000 | -38.144895000 | 29.148300000 | 1 | -14.963084000 | -36.597225000 | 34.667067000 |
| 1 | -26.810009000 | -41.063865000 | 28.326708000 | 1 | -16.720716000 | -37.097219000 | 33.208251000 |
| 1 | -24.360454000 | -39.243976000 | 28.059413000 | 1 | -18.202675000 | -37.749112000 | 33.923118000 |
| 1 | -24.565933000 | -40.500632000 | 29.272983000 | 1 | -17.700668000 | -36.081980000 | 34.292710000 |
| 1 | -26.530666000 | -40.234827000 | 25.977443000 | 6 | -12.412526000 | -35.540285000 | 31.544034000 |
| 1 | -27.916507000 | -39.459827000 | 26.755148000 | 8 | -13.070768000 | -36.455083000 | 32.565451000 |
| 1 | -26.391284000 | -38.573232000 | 26.571075000 | 6 | -14.098263000 | -36.086175000 | 33.154835000 |
| 1 | -23.151569000 | -41.386107000 | 27.486154000 | 1 | -12.348224000 | -34.534033000 | 31.967575000 |
| 1 | -24.698872000 | -42.243682000 | 27.430878000 | 1 | -13.048737000 | -35.478420000 | 30.653976000 |
| 1 | -24.341460000 | -40.982131000 | 26.240873000 | 7 | -12.461924000 | -37.643100000 | 32.761860000 |
| 6 | -25.637671000 | -36.049572000 | 31.589738000 | 6 | -12.959625000 | -38.672188000 | 33.670155000 |
| 6 | -24.776213000 | -36.908844000 | 32.517603000 | 6 | -11.797743000 | -39.443803000 | 34.296902000 |
| 8 | -24.595171000 | -38.112358000 | 32.217803000 | 1 | -11.675604000 | -37.895378000 | 32.158006000 |
| 6 | -25.687818000 | -34.525193000 | 31.793313000 | 1 | -13.620655000 | -39.364128000 | 33.128835000 |
| 6 | -24.393617000 | -33.725233000 | 31.513862000 | 1 | -12.179897000 | -40.235520000 | 34.951395000 |
| 6 | -23.886763000 | -33.920269000 | 30.076853000 | 1 | -11.170085000 | -39.909648000 | 33.528046000 |
| 6 | -24.639587000 | -32.236078000 | 31.801669000 | 1 | -11.163855000 | -38.779730000 | 34.895195000 |
| 1 | -25.311278000 | -36.291952000 | 30.572423000 | 6 | -9.274528000  | -37.550401000 | 28.885018000 |
| 1 | -26.475879000 | -34.138770000 | 31.129921000 | 6 | -10.382750000 | -38.235617000 | 29.690436000 |
| 1 | -26.035496000 | -34.303861000 | 32.812685000 | 8 | -10.258718000 | -38.365904000 | 30.919559000 |
| 1 | -23.605659000 | -34.056957000 | 32.202179000 | 6 | -9.647999000  | -36.873828000 | 27.555809000 |
| 1 | -22.996284000 | -33.307260000 | 29.896880000 | 6 | -10.553395000 | -35.628184000 | 27.661039000 |
| 1 | -23.609430000 | -34.960193000 | 29.870755000 | 6 | -9.844468000  | -34.460120000 | 28.364346000 |
| 1 | -24.650339000 | -33.624216000 | 29.343468000 | 6 | -11.042592000 | -35.207587000 | 26.267171000 |
| 1 | -23.725498000 | -31.651896000 | 31.646298000 | 1 | -8.795933000  | -36.843169000 | 29.568683000 |
| 1 | -25.418047000 | -31.827174000 | 31.141916000 | 1 | -8.715355000  | -36.581618000 | 27.051165000 |
| 1 | -24.958377000 | -32.079567000 | 32.838883000 | 1 | -10.116542000 | -37.607913000 | 26.885263000 |
| 7 | -24.301961000 | -36.334612000 | 33.624779000 | 1 | -11.437959000 | -35.896057000 | 28.257676000 |
| 6 | -23.337086000 | -36.886319000 | 34.578563000 | 1 | -10.507911000 | -33.590648000 | 28.434645000 |
| 6 | -22.106331000 | -35.958326000 | 34.602629000 | 1 | -9.526597000  | -34.714267000 | 29.382080000 |
| 8 | -22.624595000 | -34.634858000 | 34.627364000 | 1 | -8.952324000  | -34.152057000 | 27.801644000 |
| 6 | -21.185469000 | -36.170908000 | 33.396706000 | 1 | -11.641015000 | -34.291611000 | 26.321171000 |
| 1 | -24.370806000 | -35.327436000 | 33.724267000 | 1 | -10.190889000 | -35.011740000 | 25.600145000 |
| 1 | -23.088891000 | -37.911917000 | 34.302254000 | 1 | -11.671737000 | -35.979191000 | 25.808581000 |
| 1 | -21.542429000 | -36.164093000 | 35.523418000 | 7 | -11.415894000 | -38.749435000 | 28.992966000 |
| 1 | -21.887366000 | -34.037293000 | 34.959580000 | 6 | -12.491376000 | -39.544662000 | 29.581273000 |
| 1 | -20.407180000 | -35.401002000 | 33.400916000 | 6 | -13.070470000 | -40.512638000 | 28.548269000 |
| 1 | -20.706071000 | -37.157825000 | 33.436072000 | 6 | -13.638570000 | -39.852506000 | 27.280315000 |
| 1 | -21.750488000 | -36.090861000 | 32.457762000 | 8 | -13.657762000 | -38.566450000 | 27.260787000 |
| 6 | -18.116439000 | -25.443903000 | 29.668773000 | 8 | -14.040063000 | -40.592542000 | 26.356855000 |
| 6 | -16.729470000 | -25.314203000 | 29.031751000 | 1 | -11.610781000 | -38.421273000 | 28.054793000 |
| 8 | -16.575542000 | -24.799132000 | 27.928539000 | 1 | -13.279080000 | -38.890255000 | 29.974435000 |
| 6 | -18.842447000 | -26.719400000 | 29.208746000 | 1 | -12.317278000 | -41.244133000 | 28.229595000 |
| 6 | -18.216543000 | -28.001071000 | 29.771840000 | 1 | -13.870804000 | -41.096266000 | 29.016124000 |
| 8 | -17.389911000 | -27.962484000 | 30.698959000 | 8 | -17.856682000 | -41.062255000 | 30.908454000 |
| 7 | -18.609152000 | -29.156231000 | 29.207903000 | 1 | -13.073314000 | -42.383862000 | 33.089279000 |
| 1 | -18.053495000 | -25.440920000 | 30.761222000 | 1 | -12.777506000 | -43.269203000 | 30.539329000 |
| 1 | -19.890580000 | -26.681911000 | 29.536282000 | 1 | -19.908656000 | -41.320121000 | 35.830873000 |
| 1 | -18.857419000 | -26.765806000 | 28.112719000 | 1 | -17.218460000 | -41.185708000 | 36.141840000 |
| 1 | -19.281912000 | -29.156977000 | 28.454711000 | 1 | -23.148657000 | -42.722292000 | 31.969595000 |
| 1 | -18.246122000 | -30.065159000 | 29.561956000 | 1 | -22.860064000 | -43.538999000 | 29.394121000 |
| 7 | -15.704473000 | -25.822036000 | 29.785358000 | 1 | -18.704464000 | -44.466589000 | 26.250029000 |
| 6 | -14.373656000 | -26.005554000 | 29.236045000 | 1 | -16.000404000 | -44.333868000 | 26.588043000 |
| 6 | -14.015555000 | -27.404488000 | 28.691222000 | 6 | -18.199853000 | -45.669756000 | 34.527560000 |
| 8 | -13.015081000 | -27.528721000 | 27.988363000 | 1 | -18.900516000 | -46.484434000 | 34.308573000 |
| 1 | -15.990055000 | -26.382895000 | 30.580867000 | 1 | -17.669682000 | -45.914228000 | 35.459004000 |
| 1 | -14.265090000 | -25.310135000 | 28.402393000 | 1 | -18.785779000 | -44.760899000 | 34.691975000 |
| 7 | -14.815291000 | -28.436846000 | 29.061077000 | 1 | -16.733045000 | -38.154103000 | 37.378228000 |
| 6 | -14.619844000 | -29.787271000 | 28.544519000 | 1 | -23.808335000 | -36.900472000 | 35.568095000 |
| 6 | -15.318821000 | -29.996088000 | 27.182790000 | 1 | -26.654610000 | -36.457817000 | 31.671339000 |
| 6 | -15.130458000 | -31.391955000 | 26.628301000 | 1 | -27.612171000 | -40.247439000 | 33.337335000 |
| 6 | -15.873065000 | -32.472835000 | 27.130707000 | 1 | -27.989167000 | -39.063220000 | 29.150677000 |
| 6 | -14.197692000 | -31.638369000 | 25.611849000 | 1 | -12.338180000 | -42.214310000 | 19.654027000 |
| 6 | -15.684678000 | -33.760566000 | 26.622520000 | 1 | -13.277864000 | -41.739838000 | 23.995846000 |
| 6 | -14.007066000 | -32.926955000 | 25.107558000 | 1 | -17.798733000 | -39.660520000 | 21.690859000 |
| 6 | -14.748822000 | -33.998404000 | 25.610956000 | 1 | -13.296269000 | -39.157520000 | 22.034203000 |
| 1 | -15.637929000 | -28.272173000 | 29.631981000 | 1 | -12.075361000 | -40.096302000 | 30.427688000 |
| 1 | -15.021120000 | -30.490595000 | 29.280450000 | 1 | -8.525250000  | -38.331496000 | 28.690689000 |
| 1 | -16.387273000 | -29.782131000 | 27.312878000 | 1 | -11.417936000 | -35.880789000 | 31.246083000 |
| 1 | -14.919677000 | -29.254541000 | 26.481527000 | 1 | -13.560567000 | -38.184305000 | 34.440456000 |
| 1 | -16.593113000 | -32.304277000 | 27.929669000 | 1 | -18.012525000 | -34.005104000 | 38.518535000 |
| 1 | -13.616687000 | -30.809077000 | 25.212774000 | 1 | -13.545373000 | -29.959095000 | 28.440226000 |
| 1 | -16.274711000 | -34.584123000 | 27.017791000 | 1 | -18.693332000 | -24.571595000 | 29.348888000 |
| 1 | -13.277640000 | -33.096558000 | 24.319040000 | 1 | -13.619272000 | -25.745201000 | 29.988605000 |

|   |               |               |              |
|---|---------------|---------------|--------------|
| 8 | -23.567135000 | -40.394322000 | 33.513471000 |
| 1 | -23.902306000 | -39.557326000 | 33.128659000 |
| 1 | -22.746453000 | -40.570805000 | 33.029933000 |

**4TS1c6,III**

|    |               |               |              |
|----|---------------|---------------|--------------|
| 6  | -20.033503000 | -43.801842000 | 28.875420000 |
| 6  | -20.542156000 | -42.077878000 | 33.377750000 |
| 6  | -15.724404000 | -42.090006000 | 33.896044000 |
| 6  | -15.219313000 | -43.459690000 | 29.275029000 |
| 6  | -20.587741000 | -43.383768000 | 30.079731000 |
| 6  | -22.006557000 | -43.298657000 | 30.335142000 |
| 6  | -22.154159000 | -42.798164000 | 31.594063000 |
| 6  | -20.821923000 | -42.581195000 | 32.110572000 |
| 6  | -19.265531000 | -41.914057000 | 33.900412000 |
| 6  | -18.989128000 | -41.450760000 | 35.239701000 |
| 6  | -17.636545000 | -41.478952000 | 35.393238000 |
| 6  | -17.082177000 | -41.946383000 | 34.143956000 |
| 6  | -15.169597000 | -42.484261000 | 32.684473000 |
| 6  | -13.750699000 | -42.594533000 | 32.434146000 |
| 6  | -13.610166000 | -42.968761000 | 31.132112000 |
| 6  | -14.942587000 | -43.091508000 | 30.586384000 |
| 6  | -16.496352000 | -43.639142000 | 28.756562000 |
| 6  | -16.763484000 | -44.096517000 | 27.412112000 |
| 6  | -18.115626000 | -44.226720000 | 27.307288000 |
| 6  | -18.675111000 | -43.831144000 | 28.581382000 |
| 7  | -19.890223000 | -42.956472000 | 31.180678000 |
| 7  | -18.091282000 | -42.206346000 | 33.252888000 |
| 7  | -15.869526000 | -42.797579000 | 31.552435000 |
| 7  | -17.670764000 | -43.472391000 | 29.439384000 |
| 26 | -17.881561000 | -42.796806000 | 31.346448000 |
| 1  | -21.381679000 | -41.825535000 | 34.018754000 |
| 1  | -15.041640000 | -41.856847000 | 34.707445000 |
| 1  | -14.386788000 | -43.636390000 | 28.600281000 |
| 1  | -20.720126000 | -44.111335000 | 28.093094000 |
| 6  | -15.989818000 | -36.312921000 | 29.305023000 |
| 6  | -17.808273000 | -37.509718000 | 29.848329000 |
| 6  | -19.080909000 | -38.015555000 | 30.237437000 |
| 6  | -17.166155000 | -39.674095000 | 28.857253000 |
| 6  | -16.890487000 | -38.356296000 | 29.136595000 |
| 6  | -17.219186000 | -36.224554000 | 29.957995000 |
| 6  | -19.383523000 | -39.321597000 | 29.957719000 |
| 6  | -18.386338000 | -40.261875000 | 29.401448000 |
| 7  | -15.786848000 | -37.575030000 | 28.817312000 |
| 1  | -14.980268000 | -37.867403000 | 28.254233000 |
| 6  | -17.834364000 | -35.024636000 | 30.624732000 |
| 6  | -16.828814000 | -34.046580000 | 31.263062000 |
| 7  | -17.520073000 | -32.990717000 | 31.991519000 |
| 6  | -17.918317000 | -31.848122000 | 31.414750000 |
| 8  | -17.640972000 | -31.543054000 | 30.230016000 |
| 6  | -18.726621000 | -30.912653000 | 32.294129000 |
| 1  | -17.905192000 | -33.219286000 | 32.919801000 |
| 8  | -20.591523000 | -39.906771000 | 30.162742000 |
| 6  | -21.593154000 | -39.139815000 | 30.810629000 |
| 1  | -15.244258000 | -35.545499000 | 29.146742000 |
| 1  | -19.799471000 | -37.353090000 | 30.705223000 |
| 1  | -16.482378000 | -40.310140000 | 28.305179000 |
| 1  | -18.825223000 | -41.069863000 | 28.821718000 |
| 1  | -18.517589000 | -35.365211000 | 31.411943000 |
| 1  | -18.448535000 | -34.455729000 | 29.911530000 |
| 1  | -16.169803000 | -34.573626000 | 31.961003000 |
| 1  | -16.209301000 | -33.574298000 | 30.495570000 |
| 1  | -18.181707000 | -29.968512000 | 32.402688000 |
| 1  | -18.943733000 | -31.351599000 | 33.269592000 |
| 1  | -19.672550000 | -30.685809000 | 31.789975000 |
| 1  | -22.461315000 | -39.792468000 | 30.902064000 |
| 1  | -21.865648000 | -38.255366000 | 30.219119000 |
| 1  | -21.260154000 | -38.813734000 | 31.803142000 |
| 6  | -19.132951000 | -45.584939000 | 33.093129000 |
| 16 | -17.747461000 | -45.126796000 | 31.972598000 |
| 1  | -19.581318000 | -44.675450000 | 33.499087000 |
| 1  | -18.679798000 | -46.121628000 | 33.936648000 |
| 6  | -17.308093000 | -39.604387000 | 22.720019000 |
| 6  | -15.815388000 | -39.620287000 | 22.411318000 |
| 8  | -15.295352000 | -40.584699000 | 21.829425000 |
| 6  | -17.763748000 | -40.757356000 | 23.640954000 |
| 6  | -19.300851000 | -40.879052000 | 23.598198000 |
| 6  | -17.229155000 | -40.569767000 | 25.068310000 |
| 6  | -19.865091000 | -42.101261000 | 24.331743000 |
| 1  | -17.607471000 | -38.640717000 | 23.153195000 |
| 1  | -17.340477000 | -41.683473000 | 23.227401000 |
| 1  | -19.744144000 | -39.964490000 | 24.020048000 |
| 1  | -19.622395000 | -40.918322000 | 22.547059000 |
| 1  | -17.453612000 | -41.437025000 | 25.697646000 |
| 1  | -16.142970000 | -40.433276000 | 25.094892000 |
| 1  | -17.686605000 | -39.689877000 | 25.541888000 |
| 1  | -20.954604000 | -42.155295000 | 24.219374000 |
| 1  | -19.442653000 | -43.030501000 | 23.927148000 |
| 1  | -19.643601000 | -42.076451000 | 25.403422000 |
| 7  | -15.132300000 | -38.503869000 | 22.753821000 |
| 6  | -13.696538000 | -38.328071000 | 22.591745000 |
| 6  | -13.003172000 | -38.277358000 | 23.952604000 |
| 8  | -13.631385000 | -37.289069000 | 24.753974000 |
| 1  | -15.555787000 | -37.856879000 | 23.407330000 |

|    |               |               |              |
|----|---------------|---------------|--------------|
| 1  | -13.520892000 | -37.389169000 | 22.049879000 |
| 33 | -13.078052000 | -39.257057000 | 24.437300000 |
| 1  | -11.936072000 | -38.044049000 | 23.797652000 |
| 1  | -13.720164000 | -37.685201000 | 25.661822000 |
| 6  | -12.685701000 | -42.642674000 | 24.070782000 |
| 6  | -12.423922000 | -43.203982000 | 22.677801000 |
| 8  | -11.680085000 | -44.169301000 | 22.501244000 |
| 6  | -13.421168000 | -43.651282000 | 24.970459000 |
| 8  | -13.478396000 | -43.234552000 | 26.322355000 |
| 1  | -11.713256000 | -42.429399000 | 24.529897000 |
| 1  | -14.429910000 | -43.829924000 | 24.558336000 |
| 1  | -12.885715000 | -44.605907000 | 24.947486000 |
| 1  | -13.751435000 | -42.285534000 | 26.350102000 |
| 7  | -13.064063000 | -42.559370000 | 21.657090000 |
| 6  | -12.944024000 | -42.990690000 | 20.277423000 |
| 6  | -14.309300000 | -43.136863000 | 19.570021000 |
| 6  | -15.180874000 | -44.240576000 | 20.128676000 |
| 6  | -15.078874000 | -45.552497000 | 19.646098000 |
| 6  | -16.094377000 | -43.976847000 | 21.159182000 |
| 6  | -15.863797000 | -46.576964000 | 20.177647000 |
| 6  | -16.879659000 | -44.999769000 | 21.694430000 |
| 6  | -16.767896000 | -46.303288000 | 21.206114000 |
| 1  | -13.714826000 | -41.803672000 | 21.861616000 |
| 1  | -12.403806000 | -43.940981000 | 20.292870000 |
| 1  | -14.838362000 | -42.178635000 | 19.635271000 |
| 1  | -14.109924000 | -43.323012000 | 18.505709000 |
| 1  | -14.374899000 | -45.773313000 | 18.845429000 |
| 1  | -16.180673000 | -42.960739000 | 21.535222000 |
| 1  | -15.769123000 | -47.588464000 | 19.789086000 |
| 1  | -17.580222000 | -44.777109000 | 22.495846000 |
| 1  | -17.379360000 | -47.099168000 | 21.624155000 |
| 6  | -27.042275000 | -41.108432000 | 32.741897000 |
| 6  | -27.409695000 | -40.792385000 | 31.296723000 |
| 8  | -28.251879000 | -41.459270000 | 30.671002000 |
| 6  | -27.130729000 | -42.616275000 | 33.044046000 |
| 8  | -28.452527000 | -43.099639000 | 32.851700000 |
| 6  | -26.715612000 | -42.920570000 | 34.478555000 |
| 1  | -26.038292000 | -40.739558000 | 32.973926000 |
| 1  | -26.434441000 | -43.136968000 | 32.361368000 |
| 1  | -28.706214000 | -42.751671000 | 31.970885000 |
| 1  | -26.787207000 | -43.996965000 | 34.668989000 |
| 1  | -25.686779000 | -42.592790000 | 34.662402000 |
| 1  | -27.381001000 | -42.406159000 | 35.182499000 |
| 7  | -26.771463000 | -39.735217000 | 30.741079000 |
| 6  | -27.026156000 | -39.324196000 | 29.367822000 |
| 6  | -26.181468000 | -40.072483000 | 28.313098000 |
| 6  | -24.674864000 | -39.868656000 | 28.555099000 |
| 6  | -26.618939000 | -39.638329000 | 26.906940000 |
| 6  | -23.752966000 | -40.726229000 | 27.679850000 |
| 1  | -26.090297000 | -39.212528000 | 31.295333000 |
| 1  | -26.831066000 | -38.245728000 | 29.299267000 |
| 1  | -26.408607000 | -41.141336000 | 28.432481000 |
| 1  | -24.428870000 | -38.804153000 | 28.413154000 |
| 1  | -24.464318000 | -40.093155000 | 29.607410000 |
| 1  | -26.090957000 | -40.199095000 | 26.128592000 |
| 1  | -27.694176000 | -39.799192000 | 26.759913000 |
| 1  | -26.414432000 | -38.571184000 | 26.742800000 |
| 1  | -22.708443000 | -40.613740000 | 27.990697000 |
| 1  | -24.009674000 | -41.789786000 | 27.766722000 |
| 1  | -23.817213000 | -40.454101000 | 26.619860000 |
| 6  | -25.668647000 | -36.056520000 | 31.560407000 |
| 6  | -24.847578000 | -36.919382000 | 32.524081000 |
| 8  | -24.850304000 | -38.163948000 | 32.377175000 |
| 6  | -25.281331000 | -34.575169000 | 31.421594000 |
| 6  | -23.916640000 | -34.326415000 | 30.736141000 |
| 6  | -24.025033000 | -34.457453000 | 29.209015000 |
| 6  | -23.339155000 | -32.963836000 | 31.144958000 |
| 1  | -25.616286000 | -36.558685000 | 30.588280000 |
| 1  | -26.066516000 | -34.066205000 | 30.844525000 |
| 1  | -25.296857000 | -34.092775000 | 32.408195000 |
| 1  | -23.213693000 | -35.092839000 | 31.089804000 |
| 1  | -23.040950000 | -34.360618000 | 28.736222000 |
| 1  | -24.440961000 | -35.426325000 | 28.905953000 |
| 1  | -24.673106000 | -33.672604000 | 28.795273000 |
| 1  | -22.404928000 | -32.755183000 | 30.610374000 |
| 1  | -24.043744000 | -32.151198000 | 30.918703000 |
| 1  | -23.117460000 | -32.947509000 | 32.217777000 |
| 7  | -24.207547000 | -36.285047000 | 33.506480000 |
| 6  | -23.322571000 | -36.844999000 | 34.528480000 |
| 6  | -22.085155000 | -35.930605000 | 34.624398000 |
| 8  | -22.587402000 | -34.600220000 | 34.605906000 |
| 6  | -21.091559000 | -36.166886000 | 33.482314000 |
| 1  | -24.171187000 | -35.270204000 | 33.517931000 |
| 1  | -23.065606000 | -37.875365000 | 34.276752000 |
| 1  | -21.582690000 | -36.133991000 | 35.580316000 |
| 1  | -21.859092000 | -34.008052000 | 34.968403000 |
| 1  | -20.307121000 | -35.404774000 | 34.528402000 |
| 1  | -20.626306000 | -37.157899000 | 33.563288000 |
| 1  | -21.593832000 | -36.093758000 | 32.508031000 |
| 6  | -18.207752000 | -25.383342000 | 29.750140000 |
| 6  | -16.834662000 | -25.230370000 | 29.088583000 |
| 8  | -16.707316000 | -24.701733000 | 27.988278000 |
| 6  | -18.921412000 | -26.670967000 | 29.304327000 |



|    |               |               |              |   |               |               |              |
|----|---------------|---------------|--------------|---|---------------|---------------|--------------|
| 1  | -18.775577000 | -32.429989000 | 33.264961000 | 8 | -24.596954000 | -34.388437000 | 33.455314000 |
| 1  | -20.455738000 | -32.544423000 | 32.688096000 | 6 | -22.927244000 | -34.459788000 | 30.061253000 |
| 1  | -21.491616000 | -41.893324000 | 31.958618000 | 6 | -22.543296000 | -35.900291000 | 29.645976000 |
| 1  | -21.451080000 | -40.251856000 | 31.235705000 | 6 | -23.756107000 | -36.728966000 | 29.196192000 |
| 1  | -20.308125000 | -40.681151000 | 32.542715000 | 6 | -21.488581000 | -35.835450000 | 28.529326000 |
| 6  | -15.689632000 | -47.233318000 | 31.024963000 | 1 | -24.890756000 | -34.888669000 | 30.899635000 |
| 16 | -16.859354000 | -46.621403000 | 29.741597000 | 1 | -23.304066000 | -33.953685000 | 29.159010000 |
| 1  | -15.048238000 | -46.408461000 | 31.343774000 | 1 | -22.016213000 | -33.914315000 | 30.342175000 |
| 1  | -15.043298000 | -47.972903000 | 30.534925000 | 1 | -22.084577000 | -36.418451000 | 30.499718000 |
| 6  | -15.113283000 | -39.638786000 | 21.301955000 | 1 | -23.437443000 | -37.716235000 | 28.842113000 |
| 6  | -13.682643000 | -39.214614000 | 21.609294000 | 1 | -24.477808000 | -36.891782000 | 30.005441000 |
| 8  | -12.720124000 | -39.905503000 | 21.244747000 | 1 | -24.283443000 | -36.234767000 | 28.368337000 |
| 6  | -15.575294000 | -40.911221000 | 22.049126000 | 1 | -21.113072000 | -36.835124000 | 28.282225000 |
| 6  | -16.886764000 | -41.413013000 | 21.411521000 | 1 | -21.917534000 | -35.404543000 | 27.613818000 |
| 6  | -15.712395000 | -40.658111000 | 23.558672000 | 1 | -20.638389000 | -35.211110000 | 28.825291000 |
| 6  | -17.361419000 | -42.786489000 | 21.901554000 | 7 | -22.469135000 | -35.021596000 | 32.925225000 |
| 1  | -15.812720000 | -38.817364000 | 21.508395000 | 6 | -22.014174000 | -35.513211000 | 34.227377000 |
| 1  | -14.804140000 | -41.679058000 | 21.893234000 | 6 | -21.467661000 | -36.947321000 | 34.059163000 |
| 1  | -17.677081000 | -40.668914000 | 21.593776000 | 8 | -20.561759000 | -36.956944000 | 32.953658000 |
| 1  | -16.753514000 | -41.455398000 | 20.320825000 | 6 | -22.566003000 | -37.973332000 | 33.798260000 |
| 1  | -16.030631000 | -41.561461000 | 24.089211000 | 1 | -21.818193000 | -35.250585000 | 32.182489000 |
| 1  | -14.771012000 | -40.338693000 | 24.018330000 | 1 | -22.830624000 | -35.451125000 | 34.947741000 |
| 1  | -16.466152000 | -39.881008000 | 23.750966000 | 1 | -20.938868000 | -37.200709000 | 34.985107000 |
| 1  | -18.269069000 | -43.097186000 | 21.369903000 | 1 | -19.707586000 | -36.594325000 | 33.311188000 |
| 1  | -16.596510000 | -43.553970000 | 21.726081000 | 1 | -22.124301000 | -38.967636000 | 33.677892000 |
| 1  | -17.588611000 | -42.784454000 | 22.972270000 | 1 | -23.270952000 | -38.009110000 | 34.636991000 |
| 7  | -13.550654000 | -38.026256000 | 22.244029000 | 1 | -23.124797000 | -37.736690000 | 32.884325000 |
| 6  | -12.289728000 | -37.466688000 | 22.707334000 | 6 | -22.149735000 | -27.312094000 | 29.815296000 |
| 6  | -12.210240000 | -37.521909000 | 24.232588000 | 6 | -21.191850000 | -26.848736000 | 28.714780000 |
| 8  | -13.394271000 | -36.957866000 | 24.778581000 | 8 | -21.598177000 | -26.517895000 | 27.605238000 |
| 1  | -14.362936000 | -37.637387000 | 22.706285000 | 6 | -22.505724000 | -28.801508000 | 29.680269000 |
| 1  | -12.230752000 | -36.424815000 | 22.365711000 | 6 | -21.321409000 | -29.731376000 | 29.969086000 |
| 1  | -12.110758000 | -38.564507000 | 24.552401000 | 8 | -20.298978000 | -29.316324000 | 30.541979000 |
| 1  | -11.315079000 | -36.967709000 | 24.562312000 | 7 | -21.454590000 | -31.006046000 | 29.566791000 |
| 1  | -13.638866000 | -37.539709000 | 25.545475000 | 1 | -21.729317000 | -27.131657000 | 30.809208000 |
| 6  | -10.533248000 | -41.719640000 | 24.048111000 | 1 | -23.307696000 | -29.047698000 | 30.389933000 |
| 6  | -9.739334000  | -42.029269000 | 22.783715000 | 1 | -22.899762000 | -29.003690000 | 28.676804000 |
| 8  | -8.792261000  | -42.815773000 | 22.789381000 | 1 | -22.308885000 | -31.315412000 | 29.126028000 |
| 6  | -11.099593000 | -42.989953000 | 24.704540000 | 1 | -20.733426000 | -31.718180000 | 29.794515000 |
| 8  | -11.627897000 | -42.746345000 | 25.995382000 | 7 | -19.869452000 | -26.846505000 | 29.072841000 |
| 1  | -9.848188000  | -41.247992000 | 24.764088000 | 6 | -18.811573000 | -26.658521000 | 28.098029000 |
| 1  | -11.858750000 | -43.431417000 | 24.035630000 | 6 | -18.087425000 | -27.919086000 | 27.584451000 |
| 1  | -10.294797000 | -43.723462000 | 24.811705000 | 8 | -17.315260000 | -27.812934000 | 26.633285000 |
| 1  | -12.181386000 | -41.930394000 | 25.955938000 | 1 | -19.653013000 | -27.311831000 | 29.946820000 |
| 7  | -10.143581000 | -41.357860000 | 21.663885000 | 1 | -19.254076000 | -26.169252000 | 27.228527000 |
| 6  | -9.506404000  | -41.549192000 | 20.375188000 | 7 | -18.313009000 | -29.081089000 | 28.245839000 |
| 6  | -10.515996000 | -41.852525000 | 19.245882000 | 6 | -17.696644000 | -30.330720000 | 27.814142000 |
| 6  | -11.225001000 | -43.181328000 | 19.394769000 | 6 | -18.362086000 | -30.928257000 | 26.554582000 |
| 6  | -10.662710000 | -44.359168000 | 18.883932000 | 6 | -17.648281000 | -32.175173000 | 26.080010000 |
| 6  | -12.449494000 | -43.264753000 | 20.072581000 | 6 | -17.917276000 | -33.427354000 | 26.652958000 |
| 6  | -11.301093000 | -45.589514000 | 19.047044000 | 6 | -16.662768000 | -32.094706000 | 25.085992000 |
| 6  | -13.089569000 | -44.494361000 | 20.239745000 | 6 | -17.216923000 | -34.564601000 | 26.241832000 |
| 6  | -12.518470000 | -45.661197000 | 19.727561000 | 6 | -15.956106000 | -33.228712000 | 24.680911000 |
| 1  | -10.978172000 | -40.777502000 | 21.697831000 | 6 | -16.227366000 | -34.471071000 | 25.258661000 |
| 1  | -8.794681000  | -42.369871000 | 20.497916000 | 1 | -18.971777000 | -29.120813000 | 29.017130000 |
| 1  | -11.253817000 | -41.041874000 | 19.213057000 | 1 | -17.771734000 | -31.039748000 | 28.643750000 |
| 1  | -9.966789000  | -41.827024000 | 18.294605000 | 1 | -19.411562000 | -31.148862000 | 26.787059000 |
| 1  | -9.712467000  | -44.311110000 | 18.354661000 | 1 | -18.347085000 | -30.162682000 | 25.772130000 |
| 1  | -12.889370000 | -42.354082000 | 20.470908000 | 1 | -18.669158000 | -33.504588000 | 27.436260000 |
| 1  | -10.847387000 | -46.492197000 | 18.644128000 | 1 | -16.444410000 | -31.129291000 | 24.633857000 |
| 1  | -14.036144000 | -44.540961000 | 20.773124000 | 1 | -17.442648000 | -35.527271000 | 26.693405000 |
| 1  | -13.016668000 | -46.618443000 | 19.859696000 | 1 | -15.187658000 | -33.142712000 | 23.916487000 |
| 6  | -27.709933000 | -32.912769000 | 35.177912000 | 1 | -15.653033000 | -35.345085000 | 24.961876000 |
| 6  | -28.377575000 | -33.662845000 | 34.033231000 | 6 | -18.121901000 | -35.783641000 | 37.152158000 |
| 8  | -29.614342000 | -33.755638000 | 33.942646000 | 6 | -18.664221000 | -37.211869000 | 37.085663000 |
| 6  | -28.514918000 | -33.024902000 | 36.486647000 | 8 | -19.870029000 | -37.440457000 | 37.209469000 |
| 8  | -29.813263000 | -32.468086000 | 36.342752000 | 6 | -17.051700000 | -35.362031000 | 36.134322000 |
| 6  | -27.810184000 | -32.310842000 | 37.633667000 | 6 | -17.549028000 | -35.288852000 | 34.678550000 |
| 1  | -26.689709000 | -33.274662000 | 35.342765000 | 8 | -18.444082000 | -36.108735000 | 34.331949000 |
| 1  | -28.590818000 | -34.098950000 | 36.740075000 | 8 | -16.987503000 | -34.415507000 | 33.953935000 |
| 1  | -30.147622000 | -32.859855000 | 35.508388000 | 1 | -18.997445000 | -35.133182000 | 37.072040000 |
| 1  | -28.398267000 | -32.406199000 | 38.553212000 | 1 | -16.653279000 | -34.377950000 | 36.404079000 |
| 1  | -26.814018000 | -32.735708000 | 37.796816000 | 1 | -16.197627000 | -36.052398000 | 36.149205000 |
| 1  | -27.706011000 | -31.242786000 | 37.407383000 | 7 | -17.731509000 | -38.205832000 | 37.019018000 |
| 7  | -27.548744000 | -34.210037000 | 33.111637000 | 6 | -18.098716000 | -39.614969000 | 37.002098000 |
| 6  | -28.070148000 | -34.939135000 | 31.964410000 | 6 | -17.495388000 | -40.403479000 | 35.827329000 |
| 6  | -28.357386000 | -36.431010000 | 32.241643000 | 8 | -16.089014000 | -40.565832000 | 35.992956000 |
| 6  | -27.068274000 | -37.199847000 | 32.591067000 | 6 | -17.862626000 | -39.814752000 | 34.463603000 |
| 6  | -29.097166000 | -37.043313000 | 31.042900000 | 1 | -16.772024000 | -37.964434000 | 36.801853000 |
| 6  | -27.297657000 | -38.599596000 | 33.173478000 | 1 | -19.190889000 | -39.645819000 | 36.970436000 |
| 1  | -26.536820000 | -34.153709000 | 33.236398000 | 1 | -17.902027000 | -41.421730000 | 35.894176000 |
| 1  | -27.344648000 | -34.845893000 | 31.145529000 | 1 | -15.651139000 | -39.711111000 | 35.786498000 |
| 1  | -29.027432000 | -36.460019000 | 33.112380000 | 1 | -17.445954000 | -40.434852000 | 33.663451000 |
| 1  | -26.444640000 | -37.280464000 | 31.686589000 | 1 | -18.952199000 | -39.769590000 | 34.343357000 |
| 1  | -26.485233000 | -36.610259000 | 33.309159000 | 1 | -17.492936000 | -38.789652000 | 34.355673000 |
| 1  | -29.365327000 | -38.089767000 | 31.223570000 | 6 | -13.815845000 | -36.332227000 | 34.173445000 |
| 1  | -30.023695000 | -36.496526000 | 30.829920000 | 6 | -14.092608000 | -37.799019000 | 34.455403000 |
| 1  | -28.474583000 | -37.013273000 | 30.138101000 | 8 | -14.819801000 | -38.131433000 | 35.413504000 |
| 1  | -26.344574000 | -39.076946000 | 33.428458000 | 1 | -13.472557000 | -35.857868000 | 35.098569000 |
| 1  | -27.900390000 | -38.550077000 | 34.089207000 | 1 | -14.742178000 | -35.826053000 | 33.876768000 |
| 1  | -27.817047000 | -39.260237000 | 32.469513000 | 7 | -13.502952000 | -38.671699000 | 33.615800000 |
| 6  | -24.006699000 | -34.287165000 | 31.144377000 | 6 | -13.589734000 | -40.125204000 | 33.724438000 |
| 6  | -23.694290000 | -34.587734000 | 32.610977000 | 6 | -12.430761000 | -40.717419000 | 34.533801000 |



|   |               |               |              |
|---|---------------|---------------|--------------|
| 1 | -12.879942000 | -38.310349000 | 32.892422000 |
| 1 | -13.587959000 | -40.530842000 | 32.706681000 |
| 1 | -12.509237000 | -41.810718000 | 34.567993000 |
| 1 | -11.464033000 | -40.455386000 | 34.087768000 |
| 1 | -12.450809000 | -40.343179000 | 35.562962000 |
| 6 | -10.962013000 | -36.064103000 | 30.036371000 |
| 6 | -11.663600000 | -37.383530000 | 30.372985000 |
| 8 | -11.628018000 | -37.799393000 | 31.542078000 |
| 6 | -11.296635000 | -35.343908000 | 28.721623000 |
| 6 | -12.702322000 | -34.713590000 | 28.627205000 |
| 6 | -12.905950000 | -33.592090000 | 29.658074000 |
| 6 | -12.951520000 | -34.195791000 | 27.203041000 |
| 1 | -11.125830000 | -35.408666000 | 30.897271000 |
| 1 | -10.555415000 | -34.543754000 | 28.578648000 |
| 1 | -11.148038000 | -36.028332000 | 27.874537000 |
| 1 | -13.443261000 | -35.500158000 | 28.836549000 |
| 1 | -13.909434000 | -33.160320000 | 29.568037000 |
| 1 | -12.792843000 | -33.943300000 | 30.689696000 |
| 1 | -12.182255000 | -32.781085000 | 29.497614000 |
| 1 | -13.931527000 | -33.712759000 | 27.123189000 |
| 1 | -12.192618000 | -33.449806000 | 26.927253000 |
| 1 | -12.921283000 | -35.005145000 | 26.464290000 |
| 7 | -12.217150000 | -38.077754000 | 29.358560000 |
| 6 | -12.835942000 | -39.392485000 | 29.514020000 |
| 6 | -12.639586000 | -40.255007000 | 28.264026000 |
| 6 | -13.153735000 | -39.661971000 | 26.940509000 |
| 8 | -13.689637000 | -38.491217000 | 26.989916000 |
| 8 | -13.003259000 | -40.330490000 | 25.896369000 |
| 1 | -12.386016000 | -37.645655000 | 28.457173000 |
| 1 | -13.903828000 | -39.282408000 | 29.738833000 |
| 1 | -11.575794000 | -40.484353000 | 28.120105000 |
| 1 | -13.130162000 | -41.222134000 | 28.417666000 |
| 8 | -17.253936000 | -42.392720000 | 30.042462000 |
| 1 | -12.111580000 | -43.528426000 | 31.370923000 |
| 1 | -12.044486000 | -43.663178000 | 28.645764000 |
| 1 | -18.619507000 | -44.336725000 | 34.891388000 |
| 1 | -15.972003000 | -43.772367000 | 34.985351000 |
| 1 | -22.123231000 | -45.177812000 | 31.083553000 |
| 1 | -22.077331000 | -45.114766000 | 28.371666000 |
| 1 | -18.269993000 | -44.565218000 | 24.749864000 |
| 1 | -15.577830000 | -44.224212000 | 24.858899000 |
| 6 | -16.378659000 | -47.869644000 | 32.234985000 |
| 1 | -17.023780000 | -48.700616000 | 31.925746000 |
| 1 | -15.635627000 | -48.260598000 | 32.947051000 |
| 1 | -17.002387000 | -47.138106000 | 32.757475000 |
| 1 | -17.769699000 | -40.096037000 | 37.934496000 |
| 1 | -21.199272000 | -34.872304000 | 34.581209000 |
| 1 | -24.359691000 | -33.247646000 | 31.143850000 |
| 1 | -27.649789000 | -31.850777000 | 34.899242000 |
| 1 | -28.996312000 | -34.446673000 | 31.652643000 |
| 1 | -8.934304000  | -40.650190000 | 20.097008000 |
| 1 | -11.346135000 | -41.011757000 | 23.854300000 |
| 1 | -15.144578000 | -39.826613000 | 20.221246000 |
| 1 | -11.474094000 | -38.028866000 | 22.247341000 |
| 1 | -12.372226000 | -39.872905000 | 30.378335000 |
| 1 | -9.888648000  | -36.301649000 | 30.052468000 |
| 1 | -13.059496000 | -36.193904000 | 33.395671000 |
| 1 | -14.544413000 | -40.396274000 | 34.175734000 |
| 1 | -17.717426000 | -35.651282000 | 38.167408000 |
| 1 | -16.637675000 | -30.144355000 | 27.610373000 |
| 1 | -23.063360000 | -26.719926000 | 29.710585000 |
| 1 | -18.041864000 | -25.988775000 | 28.500725000 |
| 8 | -24.783405000 | -34.383145000 | 36.263093000 |
| 1 | -24.626613000 | -34.329231000 | 35.296069000 |
| 1 | -25.127672000 | -35.280892000 | 36.384031000 |

#### 4IM1C6,III

|    |               |               |              |
|----|---------------|---------------|--------------|
| 6  | -20.051774000 | -43.685221000 | 28.609122000 |
| 6  | -20.612976000 | -42.358956000 | 33.232731000 |
| 6  | -15.814884000 | -42.070675000 | 33.794458000 |
| 6  | -15.246616000 | -43.580824000 | 29.226070000 |
| 6  | -20.626866000 | -43.329713000 | 29.824514000 |
| 6  | -22.050518000 | -43.289556000 | 30.079060000 |
| 6  | -22.205850000 | -42.924653000 | 31.381629000 |
| 6  | -20.873756000 | -42.740410000 | 31.920410000 |
| 6  | -19.351180000 | -42.157891000 | 33.786000000 |
| 6  | -19.122562000 | -41.692376000 | 35.138026000 |
| 6  | -17.773791000 | -41.594729000 | 35.293243000 |
| 6  | -17.181499000 | -42.006107000 | 34.038516000 |
| 6  | -15.235714000 | -42.493872000 | 32.600469000 |
| 6  | -13.811777000 | -42.609824000 | 32.373784000 |
| 6  | -13.656242000 | -43.059117000 | 31.096534000 |
| 6  | -14.985208000 | -43.204846000 | 30.541884000 |
| 6  | -16.508974000 | -43.696003000 | 28.653874000 |
| 6  | -16.733492000 | -44.110195000 | 27.286655000 |
| 6  | -18.083763000 | -44.151380000 | 27.109675000 |
| 6  | -18.682323000 | -43.752314000 | 28.365205000 |
| 7  | -19.935279000 | -42.984877000 | 30.955359000 |
| 7  | -18.159782000 | -42.347317000 | 33.143365000 |
| 7  | -15.923934000 | -42.871581000 | 31.480530000 |
| 7  | -17.706184000 | -43.465600000 | 29.282975000 |
| 26 | -17.931755000 | -42.929552000 | 31.221336000 |
| 1  | -21.467368000 | -42.213053000 | 33.888418000 |

|    |               |               |              |
|----|---------------|---------------|--------------|
| 1  | -15.147414000 | -41.788104000 | 34.603746000 |
| 1  | -14.399645000 | -43.791906000 | 28.578908000 |
| 1  | -20.720501000 | -43.947416000 | 27.794137000 |
| 6  | -16.013990000 | -36.433526000 | 29.208557000 |
| 6  | -17.864931000 | -37.563058000 | 29.775670000 |
| 6  | -19.147243000 | -38.026782000 | 30.191549000 |
| 6  | -17.136774000 | -39.803796000 | 29.074195000 |
| 6  | -16.903303000 | -38.471970000 | 29.188584000 |
| 6  | -17.283311000 | -36.282765000 | 29.798000000 |
| 6  | -19.420050000 | -39.362214000 | 30.077755000 |
| 6  | -18.380985000 | -40.396203000 | 29.672317000 |
| 7  | -15.772549000 | -37.710178000 | 28.859754000 |
| 1  | -14.945217000 | -38.035655000 | 28.327697000 |
| 6  | -17.898702000 | -35.028032000 | 30.355472000 |
| 6  | -16.911695000 | -34.089359000 | 31.083078000 |
| 7  | -17.621597000 | -33.029315000 | 31.783839000 |
| 6  | -17.996255000 | -31.887893000 | 31.188116000 |
| 8  | -17.686025000 | -31.597187000 | 30.008052000 |
| 6  | -18.818710000 | -30.939518000 | 32.038983000 |
| 1  | -18.023651000 | -33.245312000 | 32.710199000 |
| 8  | -20.599372000 | -39.931466000 | 30.331113000 |
| 6  | -21.685200000 | -39.116737000 | 30.770834000 |
| 1  | -15.272182000 | -35.669180000 | 29.013196000 |
| 1  | -19.871996000 | -37.321052000 | 30.578880000 |
| 1  | -16.409648000 | -40.507783000 | 28.683335000 |
| 1  | -18.853885000 | -41.108789000 | 28.982512000 |
| 1  | -18.680412000 | -35.309226000 | 31.070029000 |
| 1  | -18.395791000 | -34.448750000 | 29.564930000 |
| 1  | -16.317536000 | -34.647846000 | 31.813574000 |
| 1  | -16.226375000 | -33.624756000 | 30.367927000 |
| 1  | -18.260017000 | -30.006539000 | 32.171432000 |
| 1  | -19.080148000 | -31.377900000 | 33.003885000 |
| 1  | -19.739183000 | -30.691868000 | 31.498945000 |
| 1  | -22.529784000 | -39.791417000 | 30.898050000 |
| 1  | -21.927616000 | -38.354829000 | 30.020160000 |
| 1  | -21.448403000 | -38.626904000 | 31.719792000 |
| 6  | -17.114178000 | -45.544584000 | 33.294109000 |
| 16 | -18.005101000 | -45.192290000 | 31.722578000 |
| 1  | -16.427051000 | -44.722289000 | 33.505117000 |
| 1  | -16.502843000 | -46.438880000 | 33.116886000 |
| 6  | -17.370340000 | -39.426757000 | 22.884389000 |
| 6  | -15.888820000 | -39.497338000 | 22.533472000 |
| 8  | -15.423386000 | -40.468424000 | 21.919035000 |
| 6  | -17.849398000 | -40.575142000 | 23.799073000 |
| 6  | -19.391693000 | -40.608114000 | 23.819883000 |
| 6  | -17.245888000 | -40.454375000 | 25.206455000 |
| 6  | -19.997620000 | -41.818972000 | 24.538568000 |
| 1  | -17.617150000 | -38.458978000 | 23.341224000 |
| 1  | -17.496608000 | -41.512749000 | 23.347561000 |
| 1  | -19.761507000 | -39.683443000 | 24.288563000 |
| 1  | -19.758295000 | -40.592596000 | 22.782983000 |
| 1  | -17.494774000 | -41.323529000 | 25.823742000 |
| 1  | -16.153167000 | -40.382163000 | 25.189214000 |
| 1  | -17.631768000 | -39.559702000 | 25.715892000 |
| 1  | -21.092363000 | -41.800833000 | 24.476629000 |
| 1  | -19.654560000 | -42.756858000 | 24.082836000 |
| 1  | -19.726779000 | -41.849040000 | 25.598649000 |
| 7  | -15.152700000 | -38.415845000 | 22.881266000 |
| 6  | -13.715309000 | -38.292906000 | 22.691253000 |
| 6  | -12.990780000 | -38.305780000 | 24.037042000 |
| 8  | -13.568384000 | -37.322664000 | 24.884698000 |
| 1  | -15.536617000 | -37.766343000 | 23.555906000 |
| 1  | -13.513815000 | -37.348464000 | 22.168224000 |
| 1  | -13.085522000 | -39.296282000 | 24.494313000 |
| 1  | -11.921217000 | -38.098628000 | 23.865872000 |
| 1  | -13.679839000 | -37.748857000 | 25.775401000 |
| 6  | -12.712975000 | -42.654963000 | 23.929310000 |
| 6  | -12.553459000 | -43.169731000 | 22.503492000 |
| 8  | -11.837731000 | -44.137505000 | 22.244183000 |
| 6  | -13.397851000 | -43.687578000 | 24.842798000 |
| 8  | -13.360837000 | -43.314901000 | 26.207659000 |
| 1  | -11.709404000 | -42.467102000 | 24.328668000 |
| 1  | -14.432805000 | -43.846035000 | 24.492762000 |
| 1  | -12.873335000 | -44.644232000 | 24.754153000 |
| 1  | -13.653247000 | -42.376567000 | 26.283549000 |
| 7  | -13.251435000 | -42.482380000 | 21.550481000 |
| 6  | -13.242696000 | -42.876060000 | 20.154360000 |
| 6  | -14.660195000 | -42.990973000 | 19.551736000 |
| 6  | -15.497736000 | -44.101404000 | 20.147906000 |
| 6  | -15.451336000 | -45.399458000 | 19.621275000 |
| 6  | -16.320614000 | -43.859664000 | 21.257262000 |
| 6  | -16.202127000 | -46.431602000 | 20.186142000 |
| 6  | -17.071131000 | -44.890418000 | 21.826324000 |
| 6  | -17.015285000 | -46.179902000 | 21.293133000 |
| 1  | -13.874595000 | -41.725216000 | 21.823155000 |
| 1  | -12.713490000 | -43.831239000 | 20.102788000 |
| 1  | -15.172046000 | -42.029931000 | 19.681760000 |
| 1  | -14.545943000 | -43.151065000 | 18.470730000 |
| 1  | -14.817759000 | -45.603101000 | 18.759562000 |
| 1  | -16.364171000 | -42.854706000 | 21.668888000 |
| 1  | -16.151620000 | -47.432101000 | 19.762464000 |
| 1  | -17.699801000 | -44.685314000 | 22.689520000 |
| 1  | -17.599276000 | -46.981899000 | 21.737740000 |

|   |               |               |              |   |               |               |              |
|---|---------------|---------------|--------------|---|---------------|---------------|--------------|
| 6 | -26.917432000 | -40.971959000 | 32.640029000 | 1 | -14.456346000 | -34.973519000 | 25.228837000 |
| 6 | -27.295418000 | -40.640787000 | 31.201640000 | 6 | -18.788482000 | -34.143853000 | 37.583914000 |
| 8 | -28.243048000 | -41.200220000 | 30.623138000 | 6 | -18.807277000 | -35.653981000 | 37.328055000 |
| 6 | -27.164242000 | -42.455011000 | 32.976613000 | 8 | -19.818539000 | -36.340423000 | 37.475188000 |
| 8 | -28.536521000 | -42.791955000 | 32.828277000 | 6 | -18.433448000 | -33.292281000 | 36.348198000 |
| 6 | -26.746665000 | -42.775960000 | 34.406751000 | 6 | -19.518783000 | -33.380826000 | 35.249627000 |
| 1 | -25.872663000 | -40.712636000 | 32.837776000 | 8 | -20.705585000 | -33.252675000 | 35.651399000 |
| 1 | -26.548824000 | -43.062659000 | 32.288080000 | 8 | -19.141270000 | -33.570273000 | 34.056236000 |
| 1 | -28.778866000 | -42.423794000 | 31.952622000 | 1 | -19.789758000 | -33.869615000 | 37.919374000 |
| 1 | -26.928152000 | -43.834756000 | 34.621343000 | 1 | -18.361751000 | -32.242454000 | 36.665852000 |
| 1 | -25.684746000 | -42.556538000 | 34.560210000 | 1 | -17.461078000 | -33.567306000 | 35.925894000 |
| 1 | -27.335099000 | -42.179977000 | 35.114846000 | 7 | -17.606270000 | -36.184505000 | 36.958686000 |
| 7 | -26.545566000 | -39.691249000 | 30.591982000 | 6 | -17.419310000 | -37.561187000 | 36.536336000 |
| 6 | -26.834638000 | -39.249553000 | 29.234565000 | 6 | -16.623320000 | -37.612886000 | 35.225738000 |
| 6 | -26.272348000 | -40.165471000 | 28.125638000 | 8 | -15.426939000 | -36.868329000 | 35.475053000 |
| 6 | -24.739556000 | -40.280602000 | 28.209039000 | 6 | -17.401165000 | -37.073857000 | 34.025340000 |
| 6 | -26.753317000 | -39.654048000 | 26.759538000 | 1 | -16.819921000 | -35.577682000 | 36.765224000 |
| 6 | -24.117700000 | -41.303001000 | 27.250163000 | 1 | -18.404463000 | -38.020058000 | 36.425977000 |
| 1 | -25.802837000 | -39.225642000 | 31.116376000 | 1 | -16.372632000 | -38.669221000 | 35.032072000 |
| 1 | -26.422715000 | -38.238415000 | 29.122442000 | 1 | -15.030900000 | -36.602872000 | 34.616793000 |
| 1 | -26.704043000 | -41.161450000 | 28.294650000 | 1 | -16.762774000 | -37.077723000 | 33.135018000 |
| 1 | -24.293818000 | -39.290038000 | 28.026820000 | 1 | -18.267136000 | -37.712392000 | 33.817362000 |
| 1 | -24.468340000 | -40.556712000 | 29.235327000 | 1 | -17.754880000 | -36.051350000 | 34.197634000 |
| 1 | -26.447242000 | -40.320529000 | 25.946466000 | 6 | -12.423261000 | -35.575467000 | 31.537805000 |
| 1 | -27.847295000 | -39.577099000 | 26.729440000 | 6 | -13.105884000 | -36.482734000 | 32.550189000 |
| 1 | -26.341511000 | -38.658043000 | 26.544649000 | 8 | -14.149312000 | -36.110439000 | 33.108659000 |
| 1 | -23.043539000 | -41.407018000 | 27.438752000 | 1 | -12.365301000 | -34.567002000 | 31.957088000 |
| 1 | -24.574538000 | -42.292276000 | 27.382099000 | 1 | -13.039920000 | -35.516710000 | 30.633833000 |
| 1 | -24.244167000 | -41.016643000 | 26.199487000 | 7 | -12.499854000 | -37.667389000 | 32.772360000 |
| 6 | -25.656546000 | -36.133755000 | 31.531665000 | 6 | -13.016838000 | -38.689361000 | 33.679324000 |
| 6 | -24.788855000 | -36.958658000 | 32.484858000 | 6 | -11.868421000 | -39.448499000 | 34.344758000 |
| 8 | -24.569146000 | -38.159855000 | 32.203606000 | 1 | -11.696360000 | -37.922543000 | 32.193832000 |
| 6 | -25.741916000 | -34.607667000 | 31.709154000 | 1 | -13.660115000 | -39.390183000 | 33.128398000 |
| 6 | -24.460228000 | -33.785671000 | 31.435533000 | 1 | -12.264465000 | -40.234170000 | 34.998196000 |
| 6 | -23.929400000 | -33.991789000 | 30.008779000 | 1 | -11.219348000 | -39.920746000 | 33.597905000 |
| 6 | -24.739957000 | -32.297592000 | 31.696984000 | 1 | -11.252937000 | -38.774907000 | 34.951573000 |
| 1 | -25.311519000 | -36.385449000 | 30.522891000 | 6 | -9.209134000  | -37.598011000 | 28.983383000 |
| 1 | -26.527858000 | -34.248762000 | 31.028044000 | 6 | -10.338648000 | -38.274467000 | 29.766354000 |
| 1 | -26.109285000 | -34.377030000 | 32.719566000 | 8 | -10.242475000 | -38.404868000 | 30.997642000 |
| 1 | -23.675570000 | -34.091009000 | 32.139791000 | 6 | -9.552406000  | -36.915654000 | 27.648930000 |
| 1 | -23.047509000 | -33.365345000 | 29.832807000 | 6 | -10.448152000 | -35.662118000 | 27.741430000 |
| 1 | -23.630963000 | -35.029400000 | 29.821463000 | 6 | -9.739212000  | -34.501112000 | 28.456354000 |
| 1 | -24.687498000 | -33.719678000 | 29.260569000 | 6 | -10.912420000 | -35.236226000 | 26.340703000 |
| 1 | -23.835800000 | -31.697440000 | 31.544350000 | 1 | -8.736951000  | -36.896411000 | 29.677205000 |
| 1 | -25.517630000 | -31.914614000 | 31.020920000 | 1 | -8.608512000  | -36.630940000 | 27.161331000 |
| 1 | -25.075662000 | -32.131816000 | 32.727414000 | 1 | -10.015682000 | -37.644110000 | 26.968569000 |
| 7 | -24.352395000 | -36.357721000 | 33.593984000 | 1 | -11.343797000 | -35.922611000 | 28.324592000 |
| 6 | -23.386700000 | -36.870054000 | 34.568460000 | 1 | -10.395535000 | -33.625566000 | 28.517599000 |
| 6 | -22.168485000 | -35.925992000 | 34.577994000 | 1 | -9.438933000  | -34.759015000 | 29.478466000 |
| 8 | -22.703905000 | -34.608565000 | 34.571675000 | 1 | -8.835971000  | -34.200937000 | 27.907302000 |
| 6 | -21.240216000 | -36.153326000 | 33.380698000 | 1 | -11.501559000 | -34.313784000 | 26.386650000 |
| 1 | -24.446337000 | -35.351106000 | 33.673751000 | 1 | -10.049049000 | -35.049400000 | 25.686236000 |
| 1 | -23.123147000 | -37.899063000 | 34.320407000 | 1 | -11.543092000 | -36.008540000 | 25.872602000 |
| 1 | -21.606056000 | -36.104779000 | 35.505020000 | 7 | -11.360631000 | -38.781761000 | 29.047201000 |
| 1 | -21.970739000 | -33.994716000 | 34.879292000 | 6 | -12.450778000 | -39.574287000 | 29.611871000 |
| 1 | -20.471099000 | -35.374426000 | 33.367328000 | 6 | -13.015955000 | -40.531227000 | 28.561260000 |
| 1 | -20.747993000 | -37.132384000 | 33.446381000 | 6 | -13.561322000 | -39.856486000 | 27.290797000 |
| 1 | -21.802387000 | -36.103178000 | 32.438012000 | 8 | -13.604261000 | -38.569775000 | 27.296335000 |
| 6 | -18.056565000 | -25.416484000 | 29.574937000 | 8 | -13.920293000 | -40.583591000 | 26.341315000 |
| 6 | -16.636633000 | -25.306599000 | 29.011191000 | 1 | -11.531575000 | -38.450940000 | 28.105645000 |
| 8 | -16.419158000 | -24.799120000 | 27.915229000 | 1 | -13.240928000 | -38.917934000 | 29.996616000 |
| 6 | -18.779765000 | -26.674745000 | 29.065843000 | 1 | -12.258320000 | -41.260151000 | 28.247754000 |
| 6 | -18.203783000 | -27.971310000 | 29.647513000 | 1 | -13.823567000 | -41.119507000 | 29.011196000 |
| 8 | -17.423616000 | -27.953584000 | 30.614346000 | 8 | -17.844950000 | -41.022491000 | 30.831918000 |
| 7 | -18.587574000 | -29.115386000 | 29.055108000 | 1 | -13.047812000 | -42.384307000 | 33.108071000 |
| 1 | -18.050513000 | -25.423351000 | 30.669094000 | 1 | -12.739531000 | -43.275000000 | 30.561731000 |
| 1 | -19.842427000 | -26.622363000 | 29.340142000 | 1 | -19.903459000 | -41.465604000 | 35.853419000 |
| 1 | -18.739463000 | -26.710658000 | 27.970071000 | 1 | -17.216137000 | -41.277710000 | 36.165964000 |
| 1 | -19.221165000 | -29.098833000 | 28.268913000 | 1 | -23.120096000 | -42.770642000 | 31.941934000 |
| 1 | -18.254380000 | -30.032530000 | 29.416154000 | 1 | -22.814879000 | -43.520087000 | 29.347040000 |
| 7 | -15.657956000 | -25.822072000 | 29.819366000 | 1 | -18.640308000 | -44.428606000 | 26.222763000 |
| 6 | -14.302076000 | -26.020725000 | 29.341048000 | 1 | -15.938378000 | -44.325150000 | 26.584535000 |
| 6 | -13.934380000 | -27.420970000 | 28.806119000 | 6 | -18.045440000 | -45.780262000 | 34.486053000 |
| 8 | -12.897510000 | -27.555608000 | 28.160322000 | 1 | -18.737799000 | -46.606135000 | 34.284737000 |
| 1 | -15.989517000 | -26.377575000 | 30.600553000 | 1 | -17.468780000 | -46.030367000 | 35.389733000 |
| 1 | -14.139003000 | -25.321796000 | 28.519289000 | 1 | -18.642287000 | -44.887487000 | 34.695558000 |
| 7 | -14.770363000 | -28.442796000 | 29.120944000 | 1 | -16.867040000 | -38.118809000 | 37.307193000 |
| 6 | -14.569663000 | -29.791509000 | 28.602625000 | 1 | -23.865507000 | -36.865211000 | 35.554360000 |
| 6 | -15.197858000 | -29.974915000 | 27.203130000 | 1 | -26.665643000 | -36.562287000 | 31.606896000 |
| 6 | -15.005022000 | -31.368216000 | 26.644025000 | 1 | -27.545979000 | -40.361445000 | 33.304527000 |
| 6 | -15.805673000 | -32.436371000 | 27.079628000 | 1 | -27.922696000 | -39.185655000 | 29.122543000 |
| 6 | -14.012275000 | -31.625061000 | 25.688736000 | 1 | -12.672177000 | -42.146753000 | 19.558048000 |
| 6 | -15.615938000 | -33.721293000 | 26.564635000 | 1 | -13.270391000 | -41.713066000 | 23.964236000 |
| 6 | -13.819186000 | -32.911375000 | 25.179770000 | 1 | -17.909312000 | -39.477680000 | 21.928881000 |
| 6 | -14.619699000 | -33.970261000 | 25.615251000 | 1 | -13.383180000 | -39.117189000 | 22.056210000 |
| 1 | -15.621435000 | -28.268160000 | 29.645448000 | 1 | -12.052853000 | -40.134480000 | 30.461308000 |
| 1 | -15.021905000 | -30.494721000 | 29.308501000 | 1 | -8.463669000  | -38.385626000 | 28.801137000 |
| 1 | -16.267847000 | -29.743108000 | 27.278102000 | 1 | -11.423209000 | -35.919693000 | 31.263421000 |
| 1 | -14.748574000 | -29.233949000 | 26.532308000 | 1 | -13.639792000 | -38.196174000 | 34.428347000 |
| 1 | -16.571435000 | -32.260257000 | 27.832962000 | 1 | -18.075329000 | -33.938034000 | 38.395786000 |
| 1 | -13.386140000 | -30.805547000 | 25.341050000 | 1 | -13.494176000 | -29.980848000 | 28.554603000 |
| 1 | -16.254688000 | -34.533734000 | 26.903516000 | 1 | -18.600790000 | -24.531383000 | 29.233481000 |
| 1 | -13.042579000 | -33.088986000 | 24.439643000 | 1 | -13.586344000 | -25.775850000 | 30.135240000 |

|   |               |               |              |
|---|---------------|---------------|--------------|
| 8 | -23.512173000 | -40.415780000 | 33.543482000 |
| 1 | -23.838729000 | -39.589318000 | 33.130921000 |
| 1 | -22.650035000 | -40.575178000 | 33.130901000 |

**2P<sub>C6,III</sub>**

|    |               |               |              |
|----|---------------|---------------|--------------|
| 6  | -16.454119000 | -43.220818000 | 27.782215000 |
| 6  | -20.226048000 | -41.826099000 | 30.483415000 |
| 6  | -18.347904000 | -44.082039000 | 34.328824000 |
| 6  | -14.751960000 | -45.750837000 | 31.544995000 |
| 6  | -17.648837000 | -42.645863000 | 28.195794000 |
| 6  | -18.503415000 | -41.859535000 | 27.339410000 |
| 6  | -19.572348000 | -41.481941000 | 28.092096000 |
| 6  | -19.369053000 | -42.033784000 | 29.411004000 |
| 6  | -20.028471000 | -42.311705000 | 31.769307000 |
| 6  | -20.884471000 | -41.991259000 | 32.888778000 |
| 6  | -20.353695000 | -42.622521000 | 33.971805000 |
| 6  | -19.175804000 | -43.321856000 | 33.515293000 |
| 6  | -17.204476000 | -44.744752000 | 33.899602000 |
| 6  | -16.357488000 | -45.547491000 | 34.746826000 |
| 6  | -15.359728000 | -46.032346000 | 33.955687000 |
| 6  | -15.593002000 | -45.518520000 | 32.627310000 |
| 6  | -14.892380000 | -45.193256000 | 30.281758000 |
| 6  | -13.989795000 | -45.413084000 | 29.179691000 |
| 6  | -14.452845000 | -44.680415000 | 28.126309000 |
| 6  | -15.649633000 | -44.019973000 | 28.583544000 |
| 7  | -18.194034000 | -42.742651000 | 29.454828000 |
| 7  | -18.969130000 | -43.124799000 | 32.167860000 |
| 7  | -16.725665000 | -44.741282000 | 32.612387000 |
| 7  | -15.894937000 | -44.321579000 | 29.908164000 |
| 26 | -17.541923000 | -43.842433000 | 31.007541000 |
| 1  | -21.105322000 | -41.209888000 | 30.321215000 |
| 1  | -18.610830000 | -44.161867000 | 35.379588000 |
| 1  | -13.897974000 | -46.401815000 | 31.709280000 |
| 1  | -16.117273000 | -43.051456000 | 26.763326000 |
| 6  | -15.405955000 | -36.665464000 | 29.240521000 |
| 6  | -16.263864000 | -37.924349000 | 30.898921000 |
| 6  | -16.874363000 | -38.482027000 | 32.041091000 |
| 6  | -15.530950000 | -40.156807000 | 30.181989000 |
| 6  | -15.575560000 | -38.768551000 | 29.992960000 |
| 6  | -16.160809000 | -36.579101000 | 30.387993000 |
| 6  | -16.786351000 | -39.851070000 | 32.266913000 |
| 6  | -16.124282000 | -40.681697000 | 31.319720000 |
| 7  | -15.063836000 | -37.979932000 | 28.981898000 |
| 1  | -14.333382000 | -38.268725000 | 28.331886000 |
| 6  | -16.792527000 | -35.355649000 | 30.984243000 |
| 6  | -16.007520000 | -34.770533000 | 32.178257000 |
| 7  | -16.719499000 | -33.712365000 | 32.889751000 |
| 6  | -16.825212000 | -32.450430000 | 32.416757000 |
| 8  | -16.358116000 | -32.087727000 | 31.323147000 |
| 6  | -17.541214000 | -31.473122000 | 33.342544000 |
| 1  | -17.362793000 | -33.989982000 | 33.634259000 |
| 8  | -17.288507000 | -40.497796000 | 33.360008000 |
| 6  | -17.891719000 | -39.699977000 | 34.366935000 |
| 1  | -15.103463000 | -35.881794000 | 28.559215000 |
| 1  | -17.368167000 | -37.839281000 | 32.760540000 |
| 1  | -15.072623000 | -40.818387000 | 29.452187000 |
| 1  | -15.463110000 | -42.491545000 | 30.918153000 |
| 1  | -17.803350000 | -35.604077000 | 31.332341000 |
| 1  | -16.901252000 | -34.571530000 | 30.227363000 |
| 1  | -15.781728000 | -35.549732000 | 32.912488000 |
| 1  | -15.059574000 | -34.358931000 | 31.817236000 |
| 1  | -17.525288000 | -30.480494000 | 32.889099000 |
| 1  | -17.034638000 | -31.433018000 | 34.313948000 |
| 1  | -18.577522000 | -31.776534000 | 33.527446000 |
| 1  | -18.175049000 | -40.393961000 | 35.160664000 |
| 1  | -18.794983000 | -39.199301000 | 33.991104000 |
| 1  | -17.196963000 | -38.947702000 | 34.757908000 |
| 6  | -19.561511000 | -46.420855000 | 31.653412000 |
| 16 | -18.626420000 | -45.652867000 | 30.267043000 |
| 1  | -19.109211000 | -46.111095000 | 32.597764000 |
| 1  | -19.404198000 | -47.502899000 | 31.558678000 |
| 6  | -16.274689000 | -37.252523000 | 23.394387000 |
| 6  | -14.895956000 | -37.727542000 | 22.956250000 |
| 8  | -14.765343000 | -38.652877000 | 22.140744000 |
| 6  | -17.080560000 | -38.312464000 | 24.178817000 |
| 6  | -18.537085000 | -37.826922000 | 24.332141000 |
| 6  | -16.416415000 | -38.627172000 | 25.527392000 |
| 6  | -19.499422000 | -38.858918000 | 24.930771000 |
| 1  | -16.198749000 | -36.333536000 | 23.989840000 |
| 1  | -17.090715000 | -39.228615000 | 23.570373000 |
| 1  | -18.547385000 | -36.918037000 | 24.951575000 |
| 1  | -18.913184000 | -37.527074000 | 23.343138000 |
| 1  | -16.973070000 | -39.387791000 | 26.084090000 |
| 1  | -15.395740000 | -39.007326000 | 25.409956000 |
| 1  | -16.374418000 | -37.731112000 | 26.160676000 |
| 1  | -20.524838000 | -38.470597000 | 24.948168000 |
| 1  | -19.505994000 | -39.783161000 | 24.337754000 |
| 1  | -19.229119000 | -39.122702000 | 25.958144000 |
| 7  | -13.849756000 | -37.039229000 | 23.472362000 |
| 6  | -12.450667000 | -37.360294000 | 23.231989000 |
| 6  | -11.803561000 | -37.977425000 | 24.472341000 |
| 8  | -12.015356000 | -37.122530000 | 25.585114000 |
| 1  | -14.019174000 | -36.444819000 | 24.274610000 |

|   |               |               |              |
|---|---------------|---------------|--------------|
| 1 | -11.926719000 | -36.433796000 | 22.962251000 |
| 1 | -12.245531000 | -38.961224000 | 24.663439000 |
| 1 | -10.725767000 | -38.112053000 | 24.277445000 |
| 1 | -12.331657000 | -37.703185000 | 26.324002000 |
| 6 | -13.048441000 | -42.168867000 | 23.206292000 |
| 6 | -13.087524000 | -42.245953000 | 21.684465000 |
| 8 | -12.786960000 | -43.278277000 | 21.083588000 |
| 6 | -14.249372000 | -42.881913000 | 23.855987000 |
| 8 | -14.106682000 | -43.001115000 | 25.260163000 |
| 1 | -12.135431000 | -42.675164000 | 23.536901000 |
| 1 | -15.175651000 | -42.347245000 | 23.588021000 |
| 1 | -14.327794000 | -43.896985000 | 23.452582000 |
| 1 | -13.868014000 | -42.112260000 | 25.623756000 |
| 7 | -13.484108000 | -41.102739000 | 21.050050000 |
| 6 | -13.627517000 | -41.034253000 | 19.608195000 |
| 6 | -14.992496000 | -40.467982000 | 19.159539000 |
| 6 | -16.176049000 | -41.335444000 | 19.529335000 |
| 6 | -16.593961000 | -42.379092000 | 18.692242000 |
| 6 | -16.868348000 | -41.124491000 | 20.730381000 |
| 6 | -17.671766000 | -43.193742000 | 19.042564000 |
| 6 | -17.946108000 | -41.938616000 | 21.084521000 |
| 6 | -18.352276000 | -42.975813000 | 20.242425000 |
| 1 | -13.775743000 | -40.291749000 | 21.591937000 |
| 1 | -13.479338000 | -42.050154000 | 19.232573000 |
| 1 | -15.115412000 | -39.470151000 | 19.596411000 |
| 1 | -14.951506000 | -40.340251000 | 18.068881000 |
| 1 | -16.067862000 | -42.555190000 | 17.755348000 |
| 1 | -16.550371000 | -40.315840000 | 21.383367000 |
| 1 | -17.980424000 | -43.998134000 | 18.378599000 |
| 1 | -18.469428000 | -41.761731000 | 22.021148000 |
| 1 | -19.191351000 | -43.609337000 | 20.519309000 |
| 6 | -27.099148000 | -38.564912000 | 32.471489000 |
| 6 | -27.274541000 | -38.894190000 | 30.991861000 |
| 8 | -28.286621000 | -39.487061000 | 30.578612000 |
| 6 | -27.598919000 | -39.713407000 | 33.372469000 |
| 8 | -28.984753000 | -39.941311000 | 33.172173000 |
| 6 | -27.386613000 | -39.407409000 | 34.850920000 |
| 1 | -26.055282000 | -38.315653000 | 32.690973000 |
| 1 | -27.021353000 | -40.620125000 | 33.115853000 |
| 1 | -29.091351000 | -39.949853000 | 32.196178000 |
| 1 | -27.787184000 | -40.225215000 | 35.459425000 |
| 1 | -26.322266000 | -39.287396000 | 35.082316000 |
| 1 | -27.914663000 | -38.487546000 | 35.129409000 |
| 7 | -26.281284000 | -38.493401000 | 30.168684000 |
| 6 | -26.343083000 | -38.718123000 | 28.729192000 |
| 6 | -25.907384000 | -40.129944000 | 28.283987000 |
| 6 | -24.417051000 | -40.392890000 | 28.576766000 |
| 6 | -26.252468000 | -40.316427000 | 26.798408000 |
| 6 | -23.994881000 | -41.857493000 | 28.403175000 |
| 1 | -25.477678000 | -38.001824000 | 30.564655000 |
| 1 | -25.708137000 | -37.962161000 | 28.250008000 |
| 1 | -26.508749000 | -40.839556000 | 28.868770000 |
| 1 | -23.808820000 | -39.754857000 | 27.916121000 |
| 1 | -24.180580000 | -40.080613000 | 29.601545000 |
| 1 | -26.011467000 | -41.326030000 | 26.450287000 |
| 1 | -27.321494000 | -40.150424000 | 26.616692000 |
| 1 | -25.691769000 | -39.608485000 | 26.172534000 |
| 1 | -22.942672000 | -42.000088000 | 28.672598000 |
| 1 | -24.590221000 | -42.515085000 | 29.049015000 |
| 1 | -24.117957000 | -42.204575000 | 27.370707000 |
| 6 | -25.430531000 | -34.993824000 | 31.248488000 |
| 6 | -24.115003000 | -35.726029000 | 31.510524000 |
| 8 | -24.066656000 | -36.961590000 | 31.324182000 |
| 6 | -25.429280000 | -33.471811000 | 31.034330000 |
| 6 | -24.718133000 | -32.934035000 | 29.773041000 |
| 6 | -25.228518000 | -33.589122000 | 28.480590000 |
| 6 | -24.882529000 | -31.407746000 | 29.702829000 |
| 1 | -25.899396000 | -35.502544000 | 30.401125000 |
| 1 | -26.482025000 | -33.156456000 | 30.991235000 |
| 1 | -25.016916000 | -32.969156000 | 31.921655000 |
| 1 | -23.643844000 | -33.152678000 | 29.858682000 |
| 1 | -24.746032000 | -33.136974000 | 27.606981000 |
| 1 | -25.023695000 | -34.665177000 | 28.449317000 |
| 1 | -26.312995000 | -33.449634000 | 28.371512000 |
| 1 | -24.317400000 | -30.974972000 | 28.870105000 |
| 1 | -25.940171000 | -31.139567000 | 29.570908000 |
| 1 | -24.535718000 | -30.931282000 | 30.628866000 |
| 7 | -23.090275000 | -35.018542000 | 32.002940000 |
| 6 | -21.777595000 | -35.539554000 | 32.378051000 |
| 6 | -20.663441000 | -34.745576000 | 31.669650000 |
| 8 | -20.879713000 | -33.348228000 | 31.883951000 |
| 6 | -20.606008000 | -35.006795000 | 30.169004000 |
| 1 | -23.152819000 | -34.008633000 | 32.045596000 |
| 1 | -21.740110000 | -36.604161000 | 32.141799000 |
| 1 | -19.720625000 | -35.044729000 | 32.143735000 |
| 1 | -20.697663000 | -33.169482000 | 32.868822000 |
| 1 | -19.816503000 | -34.405838000 | 29.707772000 |
| 1 | -20.390767000 | -36.061927000 | 29.965073000 |
| 1 | -21.556381000 | -34.748529000 | 29.687131000 |
| 6 | -21.881055000 | -28.912197000 | 29.649371000 |
| 6 | -21.845553000 | -28.906201000 | 28.121316000 |
| 8 | -22.683697000 | -29.507037000 | 27.451296000 |
| 6 | -21.265643000 | -30.189353000 | 30.241523000 |

|   |               |               |              |                 |                |               |              |  |
|---|---------------|---------------|--------------|-----------------|----------------|---------------|--------------|--|
| 6 | -19.743977000 | -30.256514000 | 30.081893000 | 1               | -13.099504000  | -42.019591000 | 28.214329000 |  |
| 8 | -19.094510000 | -29.295403000 | 29.627229000 | 8               | -16.067508000  | -42.037371000 | 31.605860000 |  |
| 7 | -19.179269000 | -31.414589000 | 30.454518000 | 1               | -16.515721000  | -45.702737000 | 35.806948000 |  |
| 1 | -21.366513000 | -28.036997000 | 30.058217000 | 1               | -14.5277711000 | -46.668441000 | 34.232155000 |  |
| 1 | -21.498296000 | -30.252186000 | 31.312258000 | 1               | -21.738907000  | -41.328979000 | 32.824815000 |  |
| 1 | -21.715072000 | -31.078586000 | 29.785916000 | 1               | -20.702602000  | -42.611187000 | 34.997171000 |  |
| 1 | -19.736313000 | -32.138805000 | 30.924457000 | 1               | -20.423214000  | -40.878503000 | 27.801853000 |  |
| 1 | -18.161176000 | -31.473665000 | 30.516570000 | 1               | -18.292177000  | -41.637025000 | 26.301767000 |  |
| 7 | -20.819280000 | -28.183858000 | 27.573458000 | 1               | -14.049444000  | -44.562768000 | 27.127534000 |  |
| 6 | -20.503687000 | -28.238951000 | 26.158751000 | 1               | -13.111920000  | -46.046406000 | 29.223665000 |  |
| 6 | -19.198575000 | -28.948246000 | 25.750218000 | 6               | -21.057171000  | -46.100319000 | 31.635993000 |  |
| 8 | -18.896462000 | -28.978809000 | 24.558345000 | 1               | -21.516724000  | -46.415771000 | 30.692494000 |  |
| 1 | -20.092688000 | -27.910893000 | 28.225259000 | 1               | -21.571529000  | -46.621341000 | 32.456417000 |  |
| 1 | -21.329255000 | -28.761566000 | 25.669903000 | 1               | -21.228625000  | -45.026356000 | 31.750989000 |  |
| 7 | -18.449496000 | -29.481854000 | 26.747037000 | 1               | -15.314903000  | -34.456826000 | 35.962162000 |  |
| 6 | -17.231327000 | -30.235365000 | 26.491924000 | 1               | -21.652687000  | -35.426944000 | 33.460389000 |  |
| 6 | -17.441666000 | -31.756161000 | 26.659917000 | 1               | -26.066509000  | -35.227039000 | 32.114660000 |  |
| 6 | -16.165558000 | -32.543934000 | 26.459004000 | 1               | -27.709303000  | -37.677532000 | 32.693645000 |  |
| 6 | -15.336651000 | -32.863417000 | 27.545597000 | 1               | -27.375878000  | -38.545706000 | 28.408434000 |  |
| 6 | -15.771884000 | -32.950236000 | 25.176045000 | 1               | -12.834785000  | -40.401759000 | 19.178643000 |  |
| 6 | -14.155790000 | -33.584085000 | 27.350083000 | 1               | -13.013612000  | -41.133736000 | 23.562284000 |  |
| 6 | -14.590833000 | -33.670181000 | 24.980372000 | 1               | -16.814978000  | -36.998723000 | 22.472993000 |  |
| 6 | -13.778406000 | -33.999406000 | 26.069610000 | 1               | -12.402385000  | -38.044862000 | 22.381842000 |  |
| 1 | -18.763213000 | -29.438713000 | 27.714919000 | 1               | -11.621709000  | -41.620456000 | 30.168981000 |  |
| 1 | -16.452616000 | -29.893833000 | 27.184179000 | 1               | -8.103616000   | -39.055774000 | 30.199756000 |  |
| 1 | -17.844251000 | -31.947063000 | 27.662188000 | 1               | -11.633442000  | -38.122805000 | 32.887382000 |  |
| 1 | -18.204702000 | -32.076436000 | 25.940033000 | 1               | -14.299891000  | -41.641616000 | 33.753021000 |  |
| 1 | -15.622512000 | -32.562665000 | 28.552495000 | 1               | -19.854015000  | -34.557295000 | 38.525762000 |  |
| 1 | -16.403943000 | -32.706726000 | 24.324080000 | 1               | -16.911504000  | -30.005150000 | 25.473083000 |  |
| 1 | -13.533596000 | -33.833136000 | 28.206036000 | 1               | -22.934271000  | -28.859017000 | 29.939656000 |  |
| 1 | -14.307836000 | -33.977970000 | 23.975914000 | 1               | -20.455356000  | -27.230627000 | 25.729409000 |  |
| 1 | -12.878330000 | -34.591599000 | 25.926734000 | 8               | -22.326007000  | -39.200753000 | 31.569784000 |  |
| 6 | -19.390638000 | -34.647112000 | 37.538994000 | 1               | -22.898202000  | -38.410277000 | 31.491853000 |  |
| 6 | -17.881076000 | -34.712962000 | 37.798889000 | 1               | -24.512571000  | -38.965657000 | 31.099964000 |  |
| 8 | -17.402436000 | -34.424983000 | 38.898891000 | <b>4Pc6,III</b> |                |               |              |  |
| 6 | -19.847427000 | -33.468303000 | 36.652529000 | 6               | -20.685073000  | -42.007734000 | 31.135654000 |  |
| 6 | -19.780946000 | -33.676102000 | 35.124330000 | 6               | -18.886119000  | -44.227643000 | 35.044063000 |  |
| 8 | -20.551337000 | -32.923948000 | 34.453960000 | 6               | -14.973170000  | -45.517996000 | 32.497021000 |  |
| 8 | -18.984597000 | -34.534782000 | 34.647122000 | 6               | -16.740474000  | -43.240309000 | 28.602131000 |  |
| 1 | -19.729299000 | -35.588486000 | 37.089168000 | 6               | -20.533597000  | -42.521542000 | 32.414448000 |  |
| 1 | -20.884304000 | -33.206189000 | 36.889331000 | 6               | -21.478546000  | -42.304195000 | 33.480921000 |  |
| 1 | -19.256494000 | -32.571734000 | 36.888840000 | 6               | -20.968574000  | -42.922621000 | 34.582520000 |  |
| 7 | -17.147228000 | -35.108830000 | 36.726526000 | 6               | -19.717188000  | -43.518625000 | 34.189588000 |  |
| 6 | -15.698155000 | -35.146212000 | 36.727415000 | 6               | -17.664698000  | -44.777799000 | 34.681759000 |  |
| 6 | -15.121190000 | -36.537734000 | 36.441032000 | 6               | -16.796758000  | -45.492288000 | 35.581435000 |  |
| 8 | -15.544539000 | -36.913504000 | 35.136512000 | 6               | -15.701378000  | -45.863134000 | 34.860713000 |  |
| 6 | -15.522996000 | -37.583514000 | 37.483921000 | 6               | -15.896750000  | -45.370820000 | 33.521793000 |  |
| 1 | -17.652598000 | -35.196963000 | 35.843194000 | 6               | -15.110642000  | -44.993204000 | 31.220968000 |  |
| 1 | -15.368125000 | -34.796262000 | 37.709423000 | 6               | -14.152218000  | -45.158962000 | 30.161887000 |  |
| 1 | -14.020626000 | -36.428422000 | 36.461866000 | 6               | -14.646078000  | -44.515233000 | 29.064220000 |  |
| 1 | -15.088232000 | -37.758392000 | 34.908821000 | 6               | -15.912194000  | -43.954167000 | 29.455571000 |  |
| 1 | -15.095281000 | -38.556587000 | 37.219461000 | 6               | -17.973685000  | -42.718095000 | 28.966899000 |  |
| 1 | -15.167594000 | -37.302708000 | 38.483493000 | 6               | -18.812175000  | -41.950601000 | 28.083010000 |  |
| 1 | -16.612998000 | -37.678875000 | 37.519571000 | 6               | -19.917974000  | -41.597771000 | 28.795689000 |  |
| 6 | -12.619722000 | -37.976392000 | 33.334834000 | 6               | -19.759785000  | -42.157231000 | 30.113532000 |  |
| 6 | -13.214315000 | -39.269265000 | 33.862490000 | 7               | -19.469623000  | -43.273865000 | 32.858997000 |  |
| 8 | -14.177460000 | -39.268185000 | 34.648889000 | 7               | -17.105276000  | -44.718992000 | 33.426588000 |  |
| 1 | -12.556362000 | -37.250287000 | 34.149835000 | 7               | -16.179191000  | -44.234132000 | 30.782955000 |  |
| 1 | -13.297078000 | -37.563853000 | 32.578282000 | 7               | -18.567760000  | -42.838754000 | 30.203192000 |  |
| 7 | -12.659912000 | -40.411052000 | 33.406593000 | 26              | -17.943919000  | -43.964241000 | 31.755208000 |  |
| 6 | -13.209836000 | -41.721086000 | 33.745659000 | 1               | -19.205785000  | -44.345027000 | 36.074887000 |  |
| 6 | -12.713691000 | -42.257178000 | 35.092260000 | 1               | -14.068186000  | -46.077357000 | 32.713834000 |  |
| 1 | -11.845766000 | -40.359911000 | 32.792960000 | 1               | -16.380668000  | -43.078685000 | 27.590100000 |  |
| 1 | -12.932519000 | -42.407898000 | 32.938523000 | 1               | -21.577726000  | -41.420418000 | 30.942977000 |  |
| 1 | -13.153605000 | -43.242605000 | 35.289150000 | 6               | -16.281191000  | -36.615169000 | 29.244538000 |  |
| 1 | -11.621496000 | -42.355305000 | 35.104114000 | 6               | -16.931607000  | -37.680067000 | 31.119381000 |  |
| 1 | -13.011442000 | -41.579247000 | 35.898008000 | 6               | -17.447386000  | -38.119334000 | 32.357297000 |  |
| 6 | -9.009840000  | -38.468331000 | 30.408025000 | 6               | -15.935439000  | -39.895892000 | 30.738022000 |  |
| 6 | -10.129236000 | -39.495323000 | 30.601378000 | 6               | -16.155674000  | -38.568083000 | 30.336842000 |  |
| 8 | -10.244875000 | -40.076427000 | 31.693402000 | 6               | -17.019151000  | -36.435996000 | 30.392522000 |  |
| 6 | -9.169429000  | -37.398981000 | 29.314954000 | 6               | -17.193834000  | -39.415973000 | 32.784294000 |  |
| 6 | -10.302123000 | -36.370026000 | 29.517593000 | 6               | -16.451932000  | -40.311728000 | 31.956564000 |  |
| 6 | -10.116590000 | -35.545503000 | 30.800842000 | 7               | -15.769095000  | -37.899779000 | 29.190730000 |  |
| 6 | -10.392871000 | -35.451882000 | 28.288962000 | 1               | -15.006412000  | -38.190027000 | 28.580180000 |  |
| 1 | -8.844957000  | -38.011293000 | 31.388318000 | 6               | -17.819036000  | -35.227888000 | 30.784417000 |  |
| 1 | -8.217644000  | -36.851596000 | 29.242222000 | 6               | -17.170174000  | -34.340342000 | 31.870344000 |  |
| 1 | -9.298697000  | -37.886173000 | 28.338596000 | 7               | -18.096547000  | -33.329457000 | 32.373365000 |  |
| 1 | -11.254314000 | -36.913151000 | 29.597950000 | 6               | -18.406922000  | -32.215004000 | 31.694792000 |  |
| 1 | -10.923120000 | -34.811120000 | 30.908534000 | 8               | -17.900324000  | -31.928505000 | 30.584961000 |  |
| 1 | -10.121649000 | -36.168457000 | 31.702190000 | 6               | -19.386102000  | -31.275410000 | 32.380860000 |  |
| 1 | -9.165819000  | -34.994304000 | 30.777835000 | 1               | -18.629338000  | -33.563384000 | 33.222811000 |  |
| 1 | -11.179907000 | -34.699395000 | 28.420293000 | 8               | -17.613741000  | -39.943695000 | 33.973929000 |  |
| 1 | -9.446937000  | -34.912969000 | 28.135220000 | 6               | -18.201913000  | -39.050709000 | 34.904705000 |  |
| 1 | -10.619843000 | -36.016617000 | 27.377692000 | 1               | -16.102569000  | -35.925303000 | 28.431034000 |  |
| 7 | -10.886124000 | -39.790346000 | 29.525758000 | 1               | -18.014321000  | -37.437476000 | 32.980481000 |  |
| 6 | -11.965302000 | -40.772934000 | 29.568194000 | 1               | -15.401080000  | -40.599878000 | 30.106168000 |  |
| 6 | -12.334524000 | -41.237401000 | 28.156361000 | 1               | -15.854270000  | -42.197421000 | 31.681622000 |  |
| 6 | -12.831217000 | -40.133980000 | 27.197741000 | 1               | -18.802890000  | -35.543660000 | 31.158379000 |  |
| 8 | -12.596343000 | -38.923285000 | 27.541952000 | 1               | -18.002517000  | -34.596084000 | 29.908346000 |  |
| 8 | -13.399745000 | -40.488534000 | 26.139755000 | 1               | -16.846530000  | -34.938949000 | 32.727456000 |  |
| 1 | -10.988034000 | -39.130487000 | 28.758778000 | 1               | -16.290107000  | -33.839100000 | 31.455119000 |  |
| 1 | -12.841144000 | -40.349304000 | 30.074458000 | 1               | -20.008708000  | -30.787800000 | 31.626183000 |  |
| 1 | -11.462607000 | -41.708152000 | 27.680702000 |                 |                |               |              |  |

|    |               |               |              |   |               |               |              |
|----|---------------|---------------|--------------|---|---------------|---------------|--------------|
| 1  | -18.820617000 | -30.488052000 | 32.895002000 | 8 | -23.992483000 | -38.020016000 | 30.015032000 |
| 1  | -20.029712000 | -31.778890000 | 33.107443000 | 6 | -22.857598000 | -34.862051000 | 28.297020000 |
| 1  | -18.358687000 | -39.631844000 | 35.816424000 | 6 | -21.363802000 | -34.709013000 | 28.662882000 |
| 1  | -19.172757000 | -38.677182000 | 34.546914000 | 6 | -20.459812000 | -35.587516000 | 27.784930000 |
| 1  | -17.547143000 | -38.197082000 | 35.116504000 | 6 | -20.950711000 | -33.231546000 | 28.559769000 |
| 6  | -19.865911000 | -46.797999000 | 32.322154000 | 1 | -22.902107000 | -37.015548000 | 27.930516000 |
| 16 | -18.941826000 | -46.027351000 | 30.926654000 | 1 | -22.980145000 | -34.582008000 | 27.240706000 |
| 1  | -19.445979000 | -46.438348000 | 33.266098000 | 1 | -23.449602000 | -34.125939000 | 28.860707000 |
| 1  | -19.670716000 | -47.876410000 | 32.273048000 | 1 | -21.220083000 | -35.011401000 | 29.708775000 |
| 6  | -16.967286000 | -37.766431000 | 23.471482000 | 1 | -19.408031000 | -35.463048000 | 28.061629000 |
| 6  | -15.555125000 | -38.205644000 | 23.107358000 | 1 | -20.692203000 | -36.653292000 | 27.886115000 |
| 8  | -15.357740000 | -39.226720000 | 22.432436000 | 1 | -20.565010000 | -35.318425000 | 26.724573000 |
| 6  | -17.694025000 | -38.737357000 | 24.430310000 | 1 | -19.910475000 | -33.091305000 | 28.872960000 |
| 6  | -19.182454000 | -38.340071000 | 24.519808000 | 1 | -21.049388000 | -32.870379000 | 27.526092000 |
| 6  | -17.007858000 | -38.777926000 | 25.803474000 | 1 | -21.582858000 | -32.605313000 | 29.203171000 |
| 6  | -20.065366000 | -39.325736000 | 25.293866000 | 7 | -23.540830000 | -35.976735000 | 30.915338000 |
| 1  | -16.960985000 | -36.758231000 | 23.906490000 | 6 | -23.739067000 | -36.284487000 | 32.330325000 |
| 1  | -17.637796000 | -39.739218000 | 23.980530000 | 6 | -22.596278000 | -35.645202000 | 33.140320000 |
| 1  | -19.259568000 | -37.344308000 | 24.981292000 | 8 | -22.426814000 | -34.341903000 | 32.613039000 |
| 1  | -19.580097000 | -38.237192000 | 23.499690000 | 6 | -21.300619000 | -36.460998000 | 33.078638000 |
| 1  | -17.516228000 | -39.461603000 | 26.490448000 | 1 | -23.194147000 | -35.034830000 | 30.770729000 |
| 1  | -15.967779000 | -39.114984000 | 25.739205000 | 1 | -23.780474000 | -37.365987000 | 32.465896000 |
| 1  | -17.018851000 | -37.785850000 | 26.274364000 | 1 | -22.928784000 | -35.593224000 | 34.189325000 |
| 1  | -21.118688000 | -39.022801000 | 25.250503000 | 1 | -21.936478000 | -33.794863000 | 33.294513000 |
| 1  | -19.995442000 | -40.336081000 | 24.870295000 | 1 | -20.507090000 | -35.927585000 | 33.611426000 |
| 1  | -19.783274000 | -39.384896000 | 26.350072000 | 1 | -21.433981000 | -37.446981000 | 33.546032000 |
| 7  | -14.561046000 | -37.386450000 | 23.524879000 | 1 | -20.981246000 | -36.607492000 | 32.039479000 |
| 6  | -13.141745000 | -37.661076000 | 23.352564000 | 6 | -20.172410000 | -26.401258000 | 28.248374000 |
| 6  | -12.500855000 | -38.125576000 | 24.660312000 | 6 | -19.148241000 | -25.949378000 | 27.204281000 |
| 8  | -12.775397000 | -37.175768000 | 25.677521000 | 8 | -19.458449000 | -25.800320000 | 26.026238000 |
| 1  | -14.779066000 | -36.694858000 | 24.230861000 | 6 | -20.320594000 | -27.930785000 | 28.299497000 |
| 1  | -12.655555000 | -36.740074000 | 23.005793000 | 6 | -19.153462000 | -28.639669000 | 29.001047000 |
| 1  | -12.906790000 | -39.103901000 | 24.939254000 | 8 | -18.179466000 | -28.011294000 | 29.445311000 |
| 1  | -11.414192000 | -38.233432000 | 24.500234000 | 7 | -19.256277000 | -29.978083000 | 29.085831000 |
| 1  | -13.030894000 | -37.692359000 | 26.486013000 | 1 | -19.917111000 | -26.026557000 | 29.244726000 |
| 6  | -13.459804000 | -42.487999000 | 23.894823000 | 1 | -21.247377000 | -28.192219000 | 28.827438000 |
| 6  | -13.530981000 | -42.774857000 | 22.399309000 | 1 | -20.423863000 | -28.327318000 | 27.281008000 |
| 8  | -13.205765000 | -43.868738000 | 21.936889000 | 1 | -20.089857000 | -30.443902000 | 28.753682000 |
| 6  | -14.545463000 | -43.248820000 | 24.678255000 | 1 | -18.605677000 | -30.555979000 | 29.651075000 |
| 8  | -14.368214000 | -43.146709000 | 26.080341000 | 7 | -17.886671000 | -25.730498000 | 27.691001000 |
| 1  | -12.482142000 | -42.830343000 | 24.251702000 | 6 | -16.757897000 | -25.522338000 | 26.804090000 |
| 1  | -15.538256000 | -42.881196000 | 24.369875000 | 6 | -15.862437000 | -26.738854000 | 26.493826000 |
| 1  | -14.495580000 | -44.311804000 | 24.421323000 | 8 | -14.998318000 | -26.629966000 | 25.626915000 |
| 1  | -14.230274000 | -42.192480000 | 26.309505000 | 1 | -17.718290000 | -26.084757000 | 28.626650000 |
| 7  | -13.983420000 | -41.742031000 | 21.627529000 | 1 | -17.155385000 | -25.172596000 | 25.849538000 |
| 6  | -14.179559000 | -41.876486000 | 20.196691000 | 7 | -16.074147000 | -27.856254000 | 27.234886000 |
| 6  | -15.593628000 | -41.455196000 | 19.737830000 | 6 | -15.345021000 | -29.097307000 | 27.018291000 |
| 6  | -16.702237000 | -42.339692000 | 20.265068000 | 6 | -16.244575000 | -30.204817000 | 26.426847000 |
| 6  | -17.096437000 | -43.491484000 | 19.570598000 | 6 | -15.509605000 | -31.518004000 | 26.270121000 |
| 6  | -17.342595000 | -42.037753000 | 21.475578000 | 6 | -15.423190000 | -32.421867000 | 27.339864000 |
| 6  | -18.099715000 | -44.323669000 | 20.069546000 | 6 | -14.868281000 | -31.842755000 | 25.066550000 |
| 6  | -18.345414000 | -42.869126000 | 21.978514000 | 6 | -14.708284000 | -33.614113000 | 27.205599000 |
| 6  | -18.727910000 | -44.014974000 | 21.277822000 | 6 | -14.162764000 | -33.039884000 | 24.929034000 |
| 1  | -14.294107000 | -40.877770000 | 22.066004000 | 6 | -14.076908000 | -33.934346000 | 25.999103000 |
| 1  | -13.982275000 | -42.923667000 | 19.952881000 | 1 | -16.800178000 | -27.867102000 | 27.945553000 |
| 1  | -15.764939000 | -40.419245000 | 20.052449000 | 1 | -14.923014000 | -29.438893000 | 27.971296000 |
| 1  | -15.599731000 | -41.465071000 | 18.639128000 | 1 | -17.112479000 | -30.340876000 | 27.084395000 |
| 1  | -16.609773000 | -43.739481000 | 18.628730000 | 1 | -16.623782000 | -29.858715000 | 25.457444000 |
| 1  | -17.042669000 | -41.144407000 | 22.017130000 | 1 | -15.928696000 | -32.198923000 | 28.278406000 |
| 1  | -18.390588000 | -45.213158000 | 19.515242000 | 1 | -14.928881000 | -31.150484000 | 24.228596000 |
| 1  | -18.828808000 | -42.621394000 | 22.920522000 | 1 | -14.644007000 | -34.297494000 | 28.047972000 |
| 1  | -19.508151000 | -44.661918000 | 21.670949000 | 1 | -13.677539000 | -33.274438000 | 23.984052000 |
| 6  | -26.880262000 | -39.696805000 | 31.038544000 | 1 | -13.528926000 | -34.868213000 | 25.897850000 |
| 6  | -27.070649000 | -40.040175000 | 29.568255000 | 6 | -19.685281000 | -34.054509000 | 37.738752000 |
| 8  | -28.030168000 | -40.732752000 | 29.187195000 | 6 | -18.160441000 | -33.997019000 | 37.905103000 |
| 6  | -27.050879000 | -40.949253000 | 31.924205000 | 8 | -17.644883000 | -33.759196000 | 39.001716000 |
| 8  | -28.377837000 | -41.447972000 | 31.831918000 | 6 | -20.310702000 | -33.017135000 | 36.776998000 |
| 6  | -26.749006000 | -40.648229000 | 33.387082000 | 6 | -20.384916000 | -33.409209000 | 35.286011000 |
| 1  | -25.908705000 | -39.225793000 | 31.211068000 | 8 | -21.385565000 | -32.973285000 | 34.652298000 |
| 1  | -26.332395000 | -41.711751000 | 31.573238000 | 8 | -19.442134000 | -34.104301000 | 34.795746000 |
| 1  | -28.583841000 | -41.428486000 | 30.873523000 | 1 | -19.969778000 | -35.064355000 | 37.415336000 |
| 1  | -26.923378000 | -41.543708000 | 33.993571000 | 1 | -21.333105000 | -32.789625000 | 37.094788000 |
| 1  | -25.705659000 | -40.336646000 | 33.506091000 | 1 | -19.754506000 | -32.070663000 | 36.842110000 |
| 1  | -27.406836000 | -39.853149000 | 33.759091000 | 7 | -17.460268000 | -34.239646000 | 36.769675000 |
| 7  | -26.139995000 | -39.557208000 | 28.712001000 | 6 | -16.012913000 | -34.244186000 | 36.717105000 |
| 6  | -26.191838000 | -39.844008000 | 27.285057000 | 6 | -15.410399000 | -35.633401000 | 36.466522000 |
| 6  | -25.597740000 | -41.213096000 | 26.887502000 | 8 | -15.860991000 | -36.068092000 | 35.189554000 |
| 6  | -24.100007000 | -41.306218000 | 27.234707000 | 6 | -15.757568000 | -36.643813000 | 37.562565000 |
| 6  | -25.874142000 | -41.471780000 | 25.399117000 | 1 | -18.004224000 | -34.373175000 | 35.911570000 |
| 6  | -23.502077000 | -42.712147000 | 27.097981000 | 1 | -15.650873000 | -33.848639000 | 37.670275000 |
| 1  | -25.351608000 | -39.028859000 | 29.085897000 | 1 | -14.312219000 | -35.498746000 | 36.452371000 |
| 1  | -25.655548000 | -39.039726000 | 26.764462000 | 1 | -15.436710000 | -36.938973000 | 35.005766000 |
| 1  | -26.136809000 | -41.967958000 | 27.476392000 | 1 | -15.306612000 | -37.614834000 | 37.331297000 |
| 1  | -23.539775000 | -40.603514000 | 26.597601000 | 1 | -15.392789000 | -36.307370000 | 38.540898000 |
| 1  | -23.958515000 | -40.963698000 | 28.267843000 | 1 | -16.843119000 | -36.770352000 | 37.626615000 |
| 1  | -25.523484000 | -42.461119000 | 25.087546000 | 6 | -13.239998000 | -37.277932000 | 33.150138000 |
| 1  | -26.948081000 | -41.418052000 | 25.181994000 | 6 | -13.592791000 | -38.492744000 | 33.988439000 |
| 1  | -25.367326000 | -40.727653000 | 24.769047000 | 8 | -14.506062000 | -38.461706000 | 34.830840000 |
| 1  | -22.455209000 | -42.728090000 | 27.420288000 | 1 | -13.396095000 | -36.372465000 | 33.741025000 |
| 1  | -24.048576000 | -43.432027000 | 27.719751000 | 1 | -13.924863000 | -37.234045000 | 32.294877000 |
| 1  | -23.531862000 | -43.074665000 | 26.063880000 | 7 | -12.887982000 | -39.616144000 | 33.736780000 |
| 6  | -23.475972000 | -36.258723000 | 28.475603000 | 6 | -13.215401000 | -40.885493000 | 34.378657000 |
| 6  | -23.672083000 | -36.815854000 | 29.884752000 | 6 | -12.617373000 | -41.023453000 | 35.782819000 |

|    |               |               |              |    |                |               |              |
|----|---------------|---------------|--------------|----|----------------|---------------|--------------|
| 1  | -12.107485000 | -39.583623000 | 33.079948000 | 1  | -15.780896000  | -41.201769000 | 35.261535000 |
| 1  | -12.842016000 | -41.682142000 | 33.725814000 | 1  | -14.938961000  | -42.714030000 | 29.110945000 |
| 1  | -12.883320000 | -41.995547000 | 36.216556000 | 1  | -21.212801000  | -43.499091000 | 28.438734000 |
| 1  | -11.523995000 | -40.943897000 | 35.757458000 | 6  | -16.201639000  | -35.312027000 | 27.983962000 |
| 1  | -13.009277000 | -40.236927000 | 36.434443000 | 6  | -17.918195000  | -36.647745000 | 28.558390000 |
| 6  | -9.406702000  | -37.925147000 | 30.415458000 | 6  | -19.052279000  | -37.293006000 | 29.082365000 |
| 6  | -10.490558000 | -38.945221000 | 30.773449000 | 6  | -17.337488000  | -38.671712000 | 27.261422000 |
| 8  | -10.535185000 | -39.415454000 | 31.921767000 | 6  | -17.071310000  | -37.353912000 | 27.658272000 |
| 6  | -9.652016000  | -36.975697000 | 29.231489000 | 6  | -17.348844000  | -35.336843000 | 28.749495000 |
| 6  | -10.791728000 | -35.948106000 | 29.398254000 | 6  | -19.284904000  | -38.609715000 | 28.710208000 |
| 6  | -10.539015000 | -34.983429000 | 30.567203000 | 6  | -18.455518000  | -39.292907000 | 27.98793000  |
| 6  | -10.987343000 | -35.174923000 | 28.085547000 | 7  | -16.037104000  | -36.512577000 | 27.315687000 |
| 1  | -9.200285000  | -37.368014000 | 31.334151000 | 1  | -15.217262000  | -36.813877000 | 26.787647000 |
| 1  | -8.717876000  | -36.425178000 | 29.044602000 | 6  | -17.946156000  | -34.249115000 | 29.604180000 |
| 1  | -9.829415000  | -37.561954000 | 28.318999000 | 6  | -16.937580000  | -33.440064000 | 30.444851000 |
| 1  | -11.722859000 | -36.495000000 | 29.604978000 | 7  | -17.625029000  | -32.502093000 | 31.326508000 |
| 1  | -11.353400000 | -34.254624000 | 30.649304000 | 6  | -17.850493000  | -31.220413000 | 31.013449000 |
| 1  | -10.467317000 | -35.502040000 | 31.529908000 | 8  | -17.425872000  | -30.676633000 | 29.963679000 |
| 1  | -9.605517000  | -34.423109000 | 30.416388000 | 6  | -18.653570000  | -30.424276000 | 32.024939000 |
| 1  | -11.785886000 | -34.430261000 | 28.179673000 | 1  | -18.086464000  | -32.879252000 | 32.170094000 |
| 1  | -10.068117000 | -34.638741000 | 27.809176000 | 8  | -20.367727000  | -39.333955000 | 29.205777000 |
| 1  | -11.255211000 | -35.844900000 | 27.260674000 | 6  | -20.524068000  | -39.395662000 | 30.573078000 |
| 7  | -11.299769000 | -39.360951000 | 29.776782000 | 1  | -15.484248000  | -34.514633000 | 27.844195000 |
| 6  | -12.347263000 | -40.356801000 | 29.983364000 | 1  | -19.721975000  | -36.781214000 | 29.766827000 |
| 6  | -12.772364000 | -40.985552000 | 28.653852000 | 1  | -16.683074000  | -39.203889000 | 26.578251000 |
| 6  | -13.365236000 | -40.009812000 | 27.616018000 | 1  | -18.692033000  | -40.323596000 | 27.557050000 |
| 8  | -13.200035000 | -38.761421000 | 27.839004000 | 1  | -18.667901000  | -34.699328000 | 30.296548000 |
| 8  | -13.942846000 | -40.495530000 | 26.614864000 | 1  | -18.520450000  | -33.538552000 | 28.991834000 |
| 1  | -11.459581000 | -38.780892000 | 28.958443000 | 1  | -16.326815000  | -34.107484000 | 31.061372000 |
| 1  | -13.209411000 | -39.901761000 | 30.485142000 | 1  | -16.268948000  | -32.863941000 | 29.799854000 |
| 1  | -11.911179000 | -41.477788000 | 28.180657000 | 1  | -18.029471000  | -29.610516000 | 32.410370000 |
| 1  | -13.502577000 | -41.781029000 | 28.839664000 | 1  | -19.021025000  | -31.048276000 | 32.840946000 |
| 8  | -16.274776000 | -41.583988000 | 32.447601000 | 1  | -19.507551000  | -29.965929000 | 31.514042000 |
| 1  | -13.221360000 | -45.704093000 | 30.258894000 | 1  | -21.469605000  | -39.884498000 | 30.806576000 |
| 1  | -14.225190000 | -44.402540000 | 28.071785000 | 1  | -20.354883000  | -38.455205000 | 31.105780000 |
| 1  | -17.008115000 | -45.669193000 | 36.628699000 | 1  | -19.544880000  | -40.142838000 | 31.074979000 |
| 1  | -14.826040000 | -46.406727000 | 35.193878000 | 6  | -19.541666000  | -45.335887000 | 33.455530000 |
| 1  | -21.384223000 | -42.970916000 | 35.581385000 | 16 | -18.051095000  | -44.613955000 | 32.667631000 |
| 1  | -22.392248000 | -41.733913000 | 33.370881000 | 1  | -20.124995000  | -44.518737000 | 33.893182000 |
| 1  | -20.766523000 | -41.004762000 | 28.479441000 | 1  | -19.202005000  | -45.970451000 | 34.282293000 |
| 1  | -18.563306000 | -41.715406000 | 27.056742000 | 6  | -16.7771017000 | -40.804535000 | 21.516116000 |
| 6  | -21.371933000 | -46.533195000 | 32.275203000 | 6  | -15.246916000  | -40.852482000 | 21.520274000 |
| 1  | -21.805043000 | -46.896258000 | 31.336591000 | 8  | -14.647150000  | -41.930315000 | 21.384092000 |
| 1  | -21.880800000 | -47.042048000 | 33.107167000 | 6  | -17.418564000  | -41.586570000 | 22.681272000 |
| 1  | -21.582691000 | -45.461949000 | 32.348816000 | 6  | -18.904435000  | -41.855821000 | 22.366943000 |
| 1  | -15.678789000 | -33.578996000 | 35.909620000 | 6  | -17.224689000  | -40.847191000 | 24.012850000 |
| 1  | -24.699083000 | -35.855065000 | 32.645100000 | 6  | -19.623612000  | -42.743188000 | 23.389868000 |
| 1  | -24.477075000 | -36.270854000 | 28.021225000 | 1  | -17.130448000  | -39.767001000 | 21.518104000 |
| 1  | -27.661037000 | -38.978094000 | 31.323354000 | 1  | -16.905159000  | -42.556546000 | 22.740383000 |
| 1  | -27.241534000 | -39.805663000 | 26.975893000 | 1  | -19.433283000  | -40.894165000 | 22.285852000 |
| 1  | -13.443673000 | -41.262165000 | 19.654893000 | 1  | -18.974622000  | -42.329145000 | 21.376706000 |
| 1  | -13.545374000 | -41.417790000 | 24.110368000 | 1  | -17.580187000  | -41.443571000 | 24.859661000 |
| 1  | -17.522098000 | -37.709215000 | 22.526276000 | 1  | -16.174557000  | -40.610219000 | 24.212016000 |
| 1  | -13.038022000 | -38.421331000 | 22.574789000 | 1  | -17.787733000  | -39.903421000 | 24.017014000 |
| 1  | -11.948963000 | -41.122550000 | 30.655373000 | 1  | -20.651695000  | -42.952783000 | 23.071172000 |
| 1  | -8.500079000  | -38.515251000 | 30.216832000 | 1  | -19.109169000  | -43.706045000 | 23.506808000 |
| 1  | -12.213112000 | -37.315807000 | 32.776067000 | 1  | -19.673951000  | -42.270894000 | 24.376389000 |
| 1  | -14.304626000 | -40.973995000 | 34.420317000 | 7  | -14.617990000  | -39.659145000 | 21.616237000 |
| 1  | -20.088598000 | -33.904402000 | 38.744213000 | 6  | -13.173827000  | -39.485640000 | 21.685428000 |
| 1  | -14.518135000 | -28.872096000 | 26.341289000 | 6  | -12.767424000  | -38.935841000 | 23.053084000 |
| 1  | -21.129630000 | -25.965172000 | 27.948532000 | 8  | -13.536663000  | -37.776465000 | 23.323390000 |
| 1  | -16.104874000 | -24.735706000 | 27.200957000 | 1  | -15.140356000  | -38.856357000 | 21.946383000 |
| 8  | -23.171178000 | -39.755602000 | 32.088372000 | 1  | -12.870279000  | -38.783622000 | 20.897179000 |
| 1  | -23.447509000 | -39.195791000 | 31.330764000 | 1  | -12.946750000  | -39.698943000 | 23.817885000 |
| 1  | -22.295796000 | -39.413488000 | 32.328199000 | 1  | -11.687883000  | -38.706921000 | 23.034540000 |
| 1  |               |               |              | 1  | -13.783927000  | -37.826870000 | 24.284604000 |
| 6  | -20.558681000 | -43.227778000 | 29.262256000 | 6  | -12.669204000  | -42.972491000 | 24.685078000 |
| 6  | -21.215018000 | -41.986859000 | 33.899714000 | 6  | -12.129771000  | -43.971411000 | 23.667212000 |
| 6  | -16.430708000 | -41.502955000 | 34.445144000 | 8  | -11.411122000  | -44.911646000 | 24.006370000 |
| 6  | -15.784017000 | -42.633526000 | 29.789890000 | 6  | -13.677622000  | -43.621650000 | 25.648902000 |
| 6  | -21.158660000 | -42.927615000 | 30.479626000 | 8  | -14.039385000  | -42.764855000 | 26.718011000 |
| 6  | -22.580506000 | -42.948541000 | 30.718706000 | 1  | -11.819696000  | -42.611404000 | 25.276071000 |
| 6  | -22.767499000 | -42.588461000 | 32.020744000 | 1  | -14.563243000  | -43.947067000 | 25.076597000 |
| 6  | -21.454295000 | -42.352979000 | 32.576000000 | 1  | -13.226863000  | -44.516833000 | 26.088996000 |
| 6  | -19.961124000 | -41.790675000 | 34.466578000 | 1  | -14.238553000  | -41.864780000 | 26.356908000 |
| 6  | -19.736654000 | -41.370266000 | 35.829773000 | 7  | -12.498111000  | -43.743198000 | 22.371095000 |
| 6  | -18.390498000 | -41.241799000 | 35.982400000 | 6  | -12.102985000  | -44.626848000 | 21.290722000 |
| 6  | -17.790096000 | -41.580447000 | 34.713367000 | 6  | -13.290862000  | -45.068503000 | 20.408117000 |
| 6  | -15.832971000 | -41.758933000 | 33.216138000 | 6  | -14.299913000  | -45.942085000 | 21.121327000 |
| 6  | -14.411854000 | -41.664261000 | 32.960562000 | 6  | -14.121885000  | -47.330251000 | 21.197697000 |
| 6  | -14.229478000 | -41.983650000 | 31.650600000 | 6  | -15.423187000  | -45.377153000 | 21.741745000 |
| 6  | -15.539958000 | -42.269479000 | 31.108450000 | 6  | -15.036382000  | -48.135844000 | 21.877583000 |
| 6  | -17.040067000 | -42.898510000 | 29.251274000 | 6  | -16.339546000  | -46.180397000 | 22.423698000 |
| 6  | -17.249025000 | -43.267592000 | 27.870150000 | 6  | -16.149941000  | -47.561970000 | 22.494781000 |
| 6  | -18.590768000 | -43.449344000 | 27.719085000 | 1  | -13.149231000  | -42.991708000 | 22.152570000 |
| 6  | -19.193888000 | -43.182091000 | 29.005257000 | 1  | -11.614295000  | -45.487918000 | 21.754258000 |
| 7  | -20.488433000 | -42.558723000 | 31.622350000 | 1  | -13.787357000  | -44.171444000 | 20.019163000 |
| 7  | -18.763877000 | -41.934337000 | 33.809879000 | 1  | -12.876706000  | -45.607358000 | 19.544718000 |
| 7  | -16.496047000 | -42.129307000 | 32.079139000 | 1  | -13.254784000  | -47.784022000 | 20.720625000 |
| 7  | -18.231948000 | -42.854703000 | 29.923479000 | 1  | -15.567119000  | -44.301198000 | 21.685359000 |
| 26 | -18.509954000 | -42.301074000 | 31.834572000 | 1  | -14.879199000  | -49.210954000 | 21.926193000 |
| 1  | -22.081901000 | -41.813472000 | 34.530563000 | 1  | -17.203306000  | -45.724876000 | 22.902392000 |
| 1  |               |               |              | 1  | -16.862943000  | -48.185934000 | 23.027952000 |

## 2TS1HA,III

|   |               |               |              |   |               |               |              |
|---|---------------|---------------|--------------|---|---------------|---------------|--------------|
| 6 | -27.414032000 | -41.065875000 | 32.921446000 | 1 | -14.672724000 | -33.001343000 | 24.456880000 |
| 6 | -27.742408000 | -40.726261000 | 31.472177000 | 6 | -18.678212000 | -33.867042000 | 36.969140000 |
| 8 | -28.493412000 | -41.441675000 | 30.785571000 | 6 | -18.653594000 | -35.382070000 | 36.745350000 |
| 6 | -27.371617000 | -42.585928000 | 33.165121000 | 8 | -19.628637000 | -36.104110000 | 36.954887000 |
| 8 | -28.626293000 | -43.187208000 | 32.881223000 | 6 | -18.416673000 | -33.037000000 | 35.695399000 |
| 6 | -27.004549000 | -42.905968000 | 34.609490000 | 6 | -19.560627000 | -33.184246000 | 34.663634000 |
| 1 | -26.461654000 | -40.615657000 | 33.218049000 | 8 | -20.722765000 | -33.060315000 | 35.138399000 |
| 1 | -26.591596000 | -43.009813000 | 32.505274000 | 8 | -19.254886000 | -33.404069000 | 33.456675000 |
| 1 | -28.871016000 | -42.819931000 | 32.005059000 | 1 | -19.670202000 | -33.618021000 | 37.348847000 |
| 1 | -26.976501000 | -43.990976000 | 34.758506000 | 1 | -18.359085000 | -31.977742000 | 35.983233000 |
| 1 | -26.026004000 | -42.483618000 | 34.862632000 | 1 | -17.461152000 | -33.295949000 | 35.227058000 |
| 1 | -27.755583000 | -42.489054000 | 35.291471000 | 7 | -17.451172000 | -35.870197000 | 36.327212000 |
| 7 | -27.181231000 | -39.593894000 | 30.988564000 | 6 | -17.228972000 | -37.233428000 | 35.881419000 |
| 6 | -27.419095000 | -39.145968000 | 29.624132000 | 6 | -16.485935000 | -37.228339000 | 34.536019000 |
| 6 | -26.417790000 | -39.702182000 | 28.588817000 | 8 | -15.335619000 | -36.401075000 | 34.739885000 |
| 6 | -24.978106000 | -39.233753000 | 28.878139000 | 6 | -17.352301000 | -36.749971000 | 33.370531000 |
| 6 | -26.884533000 | -39.321376000 | 27.175957000 | 1 | -16.704466000 | -35.233433000 | 36.078251000 |
| 6 | -23.898636000 | -39.943751000 | 28.051716000 | 1 | -18.197101000 | -37.734594000 | 35.807065000 |
| 1 | -26.561540000 | -39.043254000 | 31.587918000 | 1 | -16.165794000 | -38.263763000 | 34.330336000 |
| 1 | -27.386003000 | -38.048186000 | 29.617152000 | 1 | -15.034628000 | -36.040142000 | 33.876848000 |
| 1 | -26.450398000 | -40.797406000 | 28.680370000 | 1 | -16.756099000 | -36.703725000 | 32.452479000 |
| 1 | -24.915039000 | -38.147367000 | 28.706966000 | 1 | -18.172980000 | -37.455648000 | 33.198071000 |
| 1 | -24.763836000 | -39.385818000 | 29.943559000 | 1 | -17.776852000 | -35.757482000 | 33.557241000 |
| 1 | -26.229052000 | -39.741127000 | 26.405989000 | 6 | -12.944485000 | -34.655955000 | 30.539615000 |
| 1 | -27.900553000 | -39.687318000 | 26.982852000 | 6 | -13.317423000 | -35.591804000 | 31.677829000 |
| 1 | -26.890728000 | -38.230273000 | 27.045496000 | 8 | -14.299948000 | -35.338793000 | 32.391537000 |
| 1 | -22.895428000 | -39.604680000 | 28.330761000 | 1 | -12.970080000 | -33.626965000 | 30.909216000 |
| 1 | -23.936396000 | -41.028694000 | 28.213378000 | 1 | -13.703846000 | -34.740015000 | 29.754139000 |
| 1 | -24.018772000 | -39.764091000 | 26.976763000 | 7 | -12.519416000 | -36.670856000 | 31.828379000 |
| 6 | -26.337162000 | -35.920906000 | 31.936367000 | 6 | -12.743832000 | -37.723559000 | 32.813209000 |
| 6 | -25.386451000 | -36.740725000 | 32.810801000 | 6 | -11.416553000 | -38.223257000 | 33.386316000 |
| 8 | -25.394993000 | -37.988532000 | 32.693135000 | 1 | -11.799158000 | -36.838661000 | 31.121422000 |
| 6 | -26.259187000 | -34.384254000 | 31.956884000 | 1 | -13.289103000 | -38.559965000 | 32.350863000 |
| 6 | -25.010130000 | -33.722024000 | 31.328513000 | 1 | -11.592473000 | -39.044407000 | 34.091053000 |
| 6 | -24.825262000 | -34.108788000 | 29.853340000 | 1 | -10.756033000 | -38.591906000 | 32.592322000 |
| 6 | -25.110478000 | -32.196044000 | 31.478086000 | 1 | -10.893128000 | -37.420034000 | 33.916779000 |
| 1 | -26.205043000 | -36.297953000 | 30.916080000 | 6 | -9.711086000  | -36.636601000 | 27.520031000 |
| 1 | -27.144245000 | -34.010989000 | 31.420237000 | 6 | -10.774327000 | -37.183798000 | 28.478394000 |
| 1 | -26.375706000 | -34.027120000 | 32.990217000 | 8 | -10.561915000 | -37.151989000 | 29.702547000 |
| 1 | -24.114976000 | -34.037659000 | 31.879008000 | 6 | -10.128747000 | -36.253289000 | 26.090067000 |
| 1 | -23.961815000 | -33.587649000 | 29.424527000 | 6 | -11.105313000 | -35.064507000 | 25.953699000 |
| 1 | -24.650334000 | -35.182633000 | 29.722768000 | 6 | -10.498979000 | -33.749954000 | 26.468411000 |
| 1 | -25.709099000 | -33.836579000 | 29.258835000 | 6 | -11.557867000 | -34.920964000 | 24.492243000 |
| 1 | -24.219087000 | -31.704196000 | 31.072751000 | 1 | -9.249622000  | -35.789679000 | 28.037299000 |
| 1 | -25.986261000 | -31.801935000 | 30.943014000 | 1 | -9.214245000  | -36.012425000 | 25.527914000 |
| 1 | -25.197406000 | -31.905332000 | 32.531579000 | 1 | -10.556247000 | -37.129568000 | 25.582573000 |
| 7 | -24.624992000 | -36.079407000 | 33.681291000 | 1 | -11.998183000 | -35.280886000 | 26.557196000 |
| 6 | -23.550816000 | -36.603963000 | 34.525651000 | 1 | -11.211960000 | -32.925468000 | 26.355086000 |
| 6 | -22.302102000 | -35.724674000 | 34.296974000 | 1 | -10.226189000 | -33.803221000 | 27.528540000 |
| 8 | -22.780690000 | -34.388344000 | 34.220800000 | 1 | -9.593513000  | -33.489575000 | 25.902225000 |
| 6 | -21.530911000 | -36.108825000 | 33.029916000 | 1 | -12.240306000 | -34.069964000 | 24.381729000 |
| 1 | -24.591781000 | -35.064933000 | 33.654543000 | 1 | -10.695304000 | -34.741462000 | 23.834432000 |
| 1 | -23.374056000 | -37.655387000 | 34.293583000 | 1 | -12.078955000 | -35.817202000 | 24.135598000 |
| 1 | -21.640258000 | -35.842234000 | 35.165850000 | 7 | -11.867096000 | -37.738176000 | 27.922259000 |
| 1 | -22.009112000 | -33.784302000 | 34.455466000 | 6 | -12.969517000 | -38.347963000 | 28.660932000 |
| 1 | -20.726338000 | -35.384079000 | 32.869032000 | 6 | -13.555933000 | -39.530525000 | 27.885364000 |
| 1 | -21.090990000 | -37.110431000 | 33.126859000 | 6 | -13.955940000 | -39.235838000 | 26.426650000 |
| 1 | -22.190464000 | -36.099616000 | 32.151759000 | 8 | -13.841327000 | -38.030764000 | 26.008941000 |
| 6 | -17.121323000 | -24.596212000 | 31.131565000 | 8 | -14.356586000 | -40.202611000 | 25.733869000 |
| 6 | -15.668545000 | -24.524520000 | 30.651603000 | 1 | -12.082292000 | -37.596311000 | 26.940561000 |
| 8 | -15.334777000 | -23.794408000 | 29.723270000 | 1 | -13.749468000 | -37.601027000 | 28.853366000 |
| 6 | -17.949414000 | -25.591680000 | 30.301496000 | 1 | -12.853317000 | -40.372593000 | 27.862274000 |
| 6 | -17.546798000 | -27.051176000 | 30.546479000 | 1 | -14.448879000 | -39.895140000 | 28.408379000 |
| 8 | -16.834459000 | -27.367579000 | 31.514340000 | 8 | -18.519093000 | -40.602725000 | 31.495755000 |
| 7 | -18.001933000 | -27.954814000 | 29.662127000 | 1 | -13.669484000 | -41.390396000 | 33.699831000 |
| 1 | -17.177865000 | -24.875439000 | 32.188017000 | 1 | -13.307432000 | -42.029312000 | 31.085026000 |
| 1 | -19.012795000 | -25.485595000 | 30.556872000 | 1 | -20.520226000 | -41.178595000 | 36.551631000 |
| 1 | -17.856607000 | -25.355170000 | 29.234261000 | 1 | -17.839522000 | -40.924960000 | 36.858872000 |
| 1 | -18.580515000 | -27.665457000 | 28.886599000 | 1 | -23.695092000 | -42.485401000 | 32.569373000 |
| 1 | -17.792731000 | -28.968574000 | 29.785637000 | 1 | -23.327520000 | -43.208840000 | 29.979320000 |
| 7 | -14.800216000 | -25.336593000 | 31.332143000 | 1 | -19.138971000 | -43.730544000 | 26.828228000 |
| 6 | -13.452520000 | -25.582149000 | 30.851255000 | 1 | -16.446240000 | -43.348210000 | 27.148092000 |
| 6 | -13.229414000 | -26.831022000 | 29.971216000 | 6 | -20.409315000 | -46.144444000 | 32.485677000 |
| 8 | -12.194982000 | -26.916649000 | 29.312765000 | 1 | -19.842488000 | -46.974159000 | 32.048412000 |
| 1 | -15.236371000 | -26.023458000 | 31.938011000 | 1 | -21.277236000 | -46.565192000 | 33.012332000 |
| 1 | -13.156258000 | -24.722189000 | 30.248966000 | 1 | -20.773094000 | -45.515566000 | 31.668562000 |
| 7 | -14.184559000 | -27.793581000 | 30.010675000 | 1 | -16.619978000 | -37.775448000 | 36.620791000 |
| 6 | -14.123920000 | -28.977120000 | 29.159146000 | 1 | -23.868664000 | -36.531193000 | 35.572839000 |
| 6 | -14.648138000 | -28.686900000 | 27.735295000 | 1 | -27.347873000 | -36.235106000 | 32.230939000 |
| 6 | -14.645054000 | -29.899728000 | 26.829869000 | 1 | -28.201992000 | -40.638048000 | 33.558070000 |
| 6 | -15.608281000 | -30.910789000 | 26.982999000 | 1 | -28.432285000 | -39.454985000 | 29.349208000 |
| 6 | -13.686176000 | -30.037705000 | 25.817392000 | 1 | -11.360762000 | -44.129437000 | 20.648666000 |
| 6 | -15.616997000 | -32.018053000 | 26.132388000 | 1 | -13.135051000 | -42.107745000 | 24.201293000 |
| 6 | -13.690938000 | -31.147084000 | 24.967752000 | 1 | -17.079976000 | -41.252323000 | 20.562211000 |
| 6 | -14.660524000 | -32.140128000 | 25.120057000 | 1 | -12.703169000 | -40.451358000 | 21.488957000 |
| 1 | -15.027074000 | -27.661159000 | 30.560921000 | 1 | -12.584935000 | -38.679162000 | 29.627794000 |
| 1 | -14.729102000 | -29.757599000 | 29.629268000 | 1 | -8.931434000  | -37.410287000 | 27.470154000 |
| 1 | -15.668895000 | -28.294069000 | 27.826536000 | 1 | -11.962138000 | -34.873736000 | 30.113360000 |
| 1 | -14.029606000 | -27.892257000 | 27.303706000 | 1 | -13.382998000 | -37.324093000 | 33.602912000 |
| 1 | -16.348869000 | -30.835690000 | 27.776987000 | 1 | -17.931903000 | -33.616846000 | 37.737667000 |
| 1 | -12.933221000 | -29.262428000 | 25.689964000 | 1 | -13.085111000 | -29.315049000 | 29.111618000 |
| 1 | -16.373164000 | -32.788297000 | 26.260044000 | 1 | -17.543872000 | -23.594570000 | 31.011049000 |
| 1 | -12.942339000 | -31.231022000 | 24.183262000 | 1 | -12.761970000 | -25.650682000 | 31.700628000 |

|   |               |               |              |
|---|---------------|---------------|--------------|
| 8 | -24.079480000 | -40.155715000 | 33.881829000 |
| 1 | -24.557978000 | -39.346298000 | 33.598183000 |
| 1 | -23.440811000 | -40.295872000 | 33.166100000 |

#### 4T S1 HA, III

|    |               |               |              |
|----|---------------|---------------|--------------|
| 6  | -20.521133000 | -43.230500000 | 29.211832000 |
| 6  | -21.175829000 | -41.988201000 | 33.845025000 |
| 6  | -16.389220000 | -41.486115000 | 34.381660000 |
| 6  | -15.737397000 | -42.726822000 | 29.755538000 |
| 6  | -21.124068000 | -42.911274000 | 30.423249000 |
| 6  | -22.548353000 | -42.903275000 | 30.651747000 |
| 6  | -22.735878000 | -42.547650000 | 31.955047000 |
| 6  | -21.419589000 | -42.343068000 | 32.516384000 |
| 6  | -19.922190000 | -41.801923000 | 34.409508000 |
| 6  | -19.694678000 | -41.378375000 | 35.769123000 |
| 6  | -18.349105000 | -41.235102000 | 35.918239000 |
| 6  | -17.745958000 | -41.571142000 | 34.652212000 |
| 6  | -15.789935000 | -41.767959000 | 33.157300000 |
| 6  | -14.367019000 | -41.694648000 | 32.904958000 |
| 6  | -14.184232000 | -42.049873000 | 31.604338000 |
| 6  | -15.495774000 | -42.334834000 | 31.065044000 |
| 6  | -16.995746000 | -42.989394000 | 29.217186000 |
| 6  | -17.207613000 | -43.351667000 | 27.835174000 |
| 6  | -18.552709000 | -43.505119000 | 27.680512000 |
| 6  | -19.153017000 | -43.227590000 | 28.965646000 |
| 7  | -20.454404000 | -42.563793000 | 31.571228000 |
| 7  | -18.719880000 | -41.939074000 | 33.747189000 |
| 7  | -16.455207000 | -42.156987000 | 32.029334000 |
| 7  | -18.185571000 | -42.929951000 | 29.888943000 |
| 26 | -18.459616000 | -42.294403000 | 31.782670000 |
| 1  | -22.040241000 | -41.806898000 | 34.477038000 |
| 1  | -15.740566000 | -41.170928000 | 35.193592000 |
| 1  | -14.891727000 | -42.821300000 | 29.079074000 |
| 1  | -21.175467000 | -43.481508000 | 28.381969000 |
| 6  | -16.199945000 | -35.308317000 | 27.994760000 |
| 6  | -17.941248000 | -36.619644000 | 28.553462000 |
| 6  | -19.091830000 | -37.247883000 | 29.064292000 |
| 6  | -17.368075000 | -38.658019000 | 27.278014000 |
| 6  | -17.092030000 | -37.340779000 | 27.668661000 |
| 6  | -17.357072000 | -35.315653000 | 28.746254000 |
| 6  | -19.335910000 | -38.563536000 | 28.699094000 |
| 6  | -18.499783000 | -39.262824000 | 27.806484000 |
| 7  | -16.042400000 | -36.513773000 | 27.334232000 |
| 1  | -15.222038000 | -36.827638000 | 26.815349000 |
| 6  | -17.950315000 | -34.218599000 | 29.592089000 |
| 6  | -16.941755000 | -33.422683000 | 30.445299000 |
| 7  | -17.626446000 | -32.480178000 | 31.324811000 |
| 6  | -17.849671000 | -31.199290000 | 31.007161000 |
| 8  | -17.426203000 | -30.661118000 | 29.954016000 |
| 6  | -18.648857000 | -30.397085000 | 32.016960000 |
| 1  | -18.085061000 | -32.851651000 | 32.171981000 |
| 8  | -20.438154000 | -39.265684000 | 29.186421000 |
| 6  | -20.561020000 | -39.368207000 | 30.561057000 |
| 1  | -15.471311000 | -34.520233000 | 27.860198000 |
| 1  | -19.765003000 | -36.725994000 | 29.737907000 |
| 1  | -16.711200000 | -39.201995000 | 26.606448000 |
| 1  | -18.743959000 | -40.292893000 | 27.569250000 |
| 1  | -18.686424000 | -34.659163000 | 30.275504000 |
| 1  | -18.507616000 | -33.500341000 | 28.972977000 |
| 1  | -16.343453000 | -34.097920000 | 31.065363000 |
| 1  | -16.261008000 | -32.851695000 | 29.808342000 |
| 1  | -18.024168000 | -29.579608000 | 32.393449000 |
| 1  | -19.011399000 | -31.015976000 | 32.839058000 |
| 1  | -19.506099000 | -29.943688000 | 31.507020000 |
| 1  | -21.507451000 | -39.854037000 | 30.799041000 |
| 1  | -20.377676000 | -38.439728000 | 31.110662000 |
| 1  | -19.541704000 | -40.149869000 | 31.017312000 |
| 6  | -19.664810000 | -45.414081000 | 33.331532000 |
| 16 | -18.084119000 | -44.633598000 | 32.841082000 |
| 1  | -20.322216000 | -44.615783000 | 33.696394000 |
| 1  | -19.461439000 | -46.079227000 | 34.178463000 |
| 6  | -16.792012000 | -40.827950000 | 21.551595000 |
| 6  | -15.268042000 | -40.877702000 | 21.547979000 |
| 8  | -14.670212000 | -41.955779000 | 21.404207000 |
| 6  | -17.434878000 | -41.613424000 | 22.717013000 |
| 6  | -18.923560000 | -41.875748000 | 22.410135000 |
| 6  | -17.230409000 | -40.881359000 | 24.051108000 |
| 6  | -19.639635000 | -42.766667000 | 23.432133000 |
| 1  | -17.150016000 | -39.789969000 | 21.559395000 |
| 1  | -16.924601000 | -42.585564000 | 22.767940000 |
| 1  | -19.449528000 | -40.911827000 | 22.338284000 |
| 1  | -19.001593000 | -42.342871000 | 21.417520000 |
| 1  | -17.583445000 | -41.480256000 | 24.897157000 |
| 1  | -16.178210000 | -40.649732000 | 24.245777000 |
| 1  | -17.789481000 | -39.935386000 | 24.063300000 |
| 1  | -20.670266000 | -42.971139000 | 23.118328000 |
| 1  | -19.127576000 | -43.731879000 | 23.540398000 |
| 1  | -19.682607000 | -42.299561000 | 24.421454000 |
| 7  | -14.637433000 | -39.685636000 | 21.646027000 |
| 6  | -13.192918000 | -39.513210000 | 21.709819000 |
| 6  | -12.781847000 | -38.964891000 | 23.076845000 |
| 8  | -13.552364000 | -37.807763000 | 23.352680000 |
| 1  | -15.157336000 | -38.883545000 | 21.981902000 |

|   |               |               |              |
|---|---------------|---------------|--------------|
| 1 | -12.891937000 | -38.810479000 | 20.921196000 |
| 1 | -12.956308000 | -39.729516000 | 23.841255000 |
| 1 | -11.702929000 | -38.733469000 | 23.054050000 |
| 1 | -13.800617000 | -37.864006000 | 24.313617000 |
| 6 | -12.645521000 | -43.002241000 | 24.676349000 |
| 6 | -12.114388000 | -43.992522000 | 23.645805000 |
| 8 | -11.386319000 | -44.930790000 | 23.970354000 |
| 6 | -13.642117000 | -43.662137000 | 25.645103000 |
| 8 | -13.994725000 | -42.816269000 | 26.725666000 |
| 1 | -11.791087000 | -42.643367000 | 25.261476000 |
| 1 | -14.532824000 | -43.984916000 | 25.079105000 |
| 1 | -13.184350000 | -44.560046000 | 26.072367000 |
| 1 | -14.206834000 | -41.914757000 | 26.374529000 |
| 7 | -12.502161000 | -43.760138000 | 22.356231000 |
| 6 | -12.118527000 | -44.637184000 | 21.266349000 |
| 6 | -13.316695000 | -45.079045000 | 20.397838000 |
| 6 | -14.312870000 | -45.959942000 | 21.120162000 |
| 6 | -14.128943000 | -47.347860000 | 21.186623000 |
| 6 | -15.429764000 | -45.402361000 | 21.758575000 |
| 6 | -15.031423000 | -48.160429000 | 21.874227000 |
| 6 | -16.333996000 | -46.212599000 | 22.448410000 |
| 6 | -16.138605000 | -47.593861000 | 22.509410000 |
| 1 | -13.159841000 | -43.010684000 | 22.150191000 |
| 1 | -11.620286000 | -45.498578000 | 21.719005000 |
| 1 | -13.821662000 | -44.182011000 | 20.020031000 |
| 1 | -12.912259000 | -45.611225200 | 19.526367000 |
| 1 | -13.266795000 | -47.795892000 | 20.695335000 |
| 1 | -15.578397000 | -44.326674000 | 21.709740000 |
| 1 | -14.869913000 | -49.235247000 | 21.914709000 |
| 1 | -17.192925000 | -45.762732000 | 22.940952000 |
| 1 | -16.842332000 | -48.223288000 | 23.048488000 |
| 6 | -27.357565000 | -41.078227000 | 32.975871000 |
| 6 | -27.712653000 | -40.732297000 | 31.534390000 |
| 8 | -28.468169000 | -41.450905000 | 30.855976000 |
| 6 | -27.287656000 | -42.599590000 | 33.205117000 |
| 8 | -28.537384000 | -43.217726000 | 32.936468000 |
| 6 | -26.891797000 | -42.927146000 | 34.640174000 |
| 1 | -26.408142000 | -40.615542000 | 33.262150000 |
| 1 | -26.512174000 | -43.005363000 | 32.528650000 |
| 1 | -28.803440000 | -42.845131000 | 32.068700000 |
| 1 | -26.847079000 | -44.012983000 | 34.778862000 |
| 1 | -25.914496000 | -42.494448000 | 34.880370000 |
| 1 | -27.636331000 | -42.526262000 | 35.338675000 |
| 7 | -27.169390000 | -39.592389000 | 31.048614000 |
| 6 | -27.433378000 | -39.137972000 | 29.690974000 |
| 6 | -26.444586000 | -39.678434000 | 28.635492000 |
| 6 | -25.003571000 | -39.203639000 | 28.906594000 |
| 6 | -26.936231000 | -39.288113000 | 27.233708000 |
| 6 | -23.932764000 | -39.891426000 | 28.050610000 |
| 1 | -26.547582000 | -39.037985000 | 31.642308000 |
| 1 | -27.409612000 | -38.039963000 | 29.691045000 |
| 1 | -26.468897000 | -40.774668000 | 28.717320000 |
| 1 | -24.951525000 | -38.114172000 | 28.752028000 |
| 1 | -24.769459000 | -39.371080000 | 29.965535000 |
| 1 | -26.292063000 | -39.699423000 | 26.449808000 |
| 1 | -27.954062000 | -39.656226000 | 27.054458000 |
| 1 | -26.948432000 | -38.196052000 | 27.111950000 |
| 1 | -22.927307000 | -39.554511000 | 28.323877000 |
| 1 | -23.964764000 | -40.979874000 | 28.189262000 |
| 1 | -24.068354000 | -39.689368000 | 26.981478000 |
| 6 | -26.340011000 | -35.911763000 | 31.991839000 |
| 6 | -25.378881000 | -36.726788000 | 32.859325000 |
| 8 | -25.383729000 | -37.974788000 | 32.743307000 |
| 6 | -26.268482000 | -34.374741000 | 32.010794000 |
| 6 | -25.027224000 | -33.707476000 | 31.372323000 |
| 6 | -24.851051000 | -34.095737000 | 29.896486000 |
| 6 | -25.133972000 | -32.181788000 | 31.520399000 |
| 1 | -26.213891000 | -36.288791000 | 30.970797000 |
| 1 | -27.159238000 | -34.005750000 | 31.480664000 |
| 1 | -26.378604000 | -34.017356000 | 33.044749000 |
| 1 | -24.126577000 | -34.017938000 | 31.916774000 |
| 1 | -23.993689000 | -33.570560000 | 29.460485000 |
| 1 | -24.670872000 | -35.168756000 | 29.766470000 |
| 1 | -25.740739000 | -33.829541000 | 29.307997000 |
| 1 | -24.247829000 | -31.686216000 | 31.108173000 |
| 1 | -26.015358000 | -31.792789000 | 30.990806000 |
| 1 | -25.215049000 | -31.889932000 | 32.574053000 |
| 7 | -24.612582000 | -36.061382000 | 33.722327000 |
| 6 | -23.530018000 | -36.580821000 | 34.559012000 |
| 6 | -22.288615000 | -35.692541000 | 34.325291000 |
| 8 | -22.776651000 | -34.359112000 | 34.256698000 |
| 6 | -21.523158000 | -36.067376000 | 33.052194000 |
| 1 | -24.584456000 | -35.046736000 | 33.695214000 |
| 1 | -23.347054000 | -37.630221000 | 34.322477000 |
| 1 | -21.621107000 | -35.808359000 | 35.190096000 |
| 1 | -22.006635000 | -33.750714000 | 34.484397000 |
| 1 | -20.722977000 | -35.338259000 | 32.889180000 |
| 1 | -21.077854000 | -37.067294000 | 33.141092000 |
| 1 | -22.187815000 | -36.057771000 | 32.178018000 |
| 6 | -17.142296000 | -24.568698000 | 31.072132000 |
| 6 | -15.690121000 | -24.492474000 | 30.590886000 |
| 8 | -15.360123000 | -23.764701000 | 29.659354000 |
| 6 | -17.965627000 | -25.575368000 | 30.250827000 |





|    |               |               |               |   |               |               |              |
|----|---------------|---------------|---------------|---|---------------|---------------|--------------|
| 1  | -18.784629000 | -30.508142000 | 32.864323000  | 8 | -25.151355000 | -37.787349000 | 32.513243000 |
| 1  | -19.361401000 | -29.720702000 | 31.378302000  | 6 | -26.307184000 | -34.251213000 | 31.882698000 |
| 1  | -23.451533000 | -38.084597000 | 30.156039000  | 6 | -25.095530000 | -33.548309000 | 31.226881000 |
| 1  | -21.861346000 | -37.459326000 | 30.963054000  | 6 | -24.857938000 | -34.014208000 | 29.782554000 |
| 1  | -17.943922000 | -40.526754000 | 30.244894000  | 6 | -25.296643000 | -32.025994000 | 31.281504000 |
| 6  | -19.357468000 | -44.994959000 | 33.005688000  | 1 | -26.256089000 | -36.178133000 | 30.865452000 |
| 16 | -17.674471000 | -44.747549000 | 32.328154000  | 1 | -27.215229000 | -33.927422000 | 31.352392000 |
| 1  | -19.792186000 | -44.008537000 | 33.199503000  | 1 | -26.424436000 | -33.878789000 | 32.910537000 |
| 1  | -19.252670000 | -45.502339000 | 33.971195000  | 1 | -24.193213000 | -33.771746000 | 31.809829000 |
| 6  | -17.225044000 | -40.112413000 | 22.347494000  | 1 | -24.038531000 | -33.447673000 | 29.325641000 |
| 6  | -15.713216000 | -40.017069000 | 22.176138000  | 1 | -24.586125000 | -35.074324000 | 29.727082000 |
| 8  | -15.072610000 | -40.953221000 | 21.671456000  | 1 | -25.753962000 | -33.861467000 | 29.164277000 |
| 6  | -17.667450000 | -41.271465000 | 23.268041000  | 1 | -24.427951000 | -31.501702000 | 30.867578000 |
| 6  | -19.175660000 | -41.536025000 | 23.083389000  | 1 | -26.181052000 | -31.721572000 | 30.703965000 |
| 6  | -17.295694000 | -40.985570000 | 24.730187000  | 1 | -25.430693000 | -31.680220000 | 32.313241000 |
| 6  | -19.702585000 | -42.767655000 | 23.829307000  | 7 | -24.530406000 | -35.857497000 | 33.559638000 |
| 1  | -17.638258000 | -39.164581000 | 22.7716683000 | 6 | -23.417989000 | -36.333636000 | 34.381394000 |
| 1  | -17.124260000 | -42.167697000 | 22.936692000  | 6 | -22.287978000 | -35.284574000 | 34.299615000 |
| 1  | -19.737924000 | -40.647787000 | 23.408108000  | 8 | -22.926001000 | -34.016975000 | 34.348406000 |
| 1  | -19.385354000 | -41.656685000 | 22.010422000  | 6 | -21.440808000 | -35.423687000 | 33.030962000 |
| 1  | -17.506260000 | -41.844112000 | 25.376322000  | 1 | -24.608074000 | -34.845953000 | 33.605054000 |
| 1  | -16.232915000 | -40.754951000 | 24.856817000  | 1 | -23.094283000 | -37.316217000 | 34.032394000 |
| 1  | -17.871310000 | -40.131693000 | 25.114034000  | 1 | -21.643524000 | -35.416472000 | 35.180585000 |
| 1  | -20.763429000 | -42.935688000 | 23.607684000  | 1 | -22.218396000 | -33.346029000 | 34.597288000 |
| 1  | -19.153471000 | -43.671292000 | 23.532910000  | 1 | -20.714846000 | -34.604670000 | 32.992064000 |
| 1  | -19.603613000 | -42.658876000 | 24.914357000  | 1 | -20.897293000 | -36.377715000 | 33.016791000 |
| 7  | -15.149153000 | -38.847403000 | 22.549957000  | 1 | -22.076718000 | -35.368441000 | 32.137067000 |
| 6  | -13.719826000 | -38.569345000 | 22.531404000  | 6 | -16.999332000 | -24.649420000 | 29.405570000 |
| 6  | -13.200216000 | -38.374362000 | 23.956583000  | 6 | -15.600966000 | -24.728159000 | 28.785464000 |
| 8  | -13.997699000 | -37.400512000 | 24.610055000  | 8 | -15.357599000 | -24.238434000 | 27.686588000 |
| 1  | -15.677762000 | -38.214689000 | 23.138858000  | 6 | -17.898455000 | -25.809660000 | 28.945661000 |
| 1  | -13.550380000 | -37.655926000 | 21.945645000  | 6 | -17.468832000 | -27.164433000 | 29.522444000 |
| 1  | -13.250560000 | -39.325730000 | 24.498265000  | 8 | -16.667711000 | -27.236931000 | 30.469796000 |
| 1  | -12.145629000 | -38.054503000 | 23.907118000  | 7 | -18.003948000 | -28.255497000 | 28.949644000 |
| 1  | -14.210520000 | -37.778259000 | 25.507457000  | 1 | -16.948461000 | -24.647060000 | 30.498670000 |
| 6  | -12.460438000 | -42.576317000 | 24.233913000  | 1 | -18.932636000 | -25.619080000 | 29.264192000 |
| 6  | -12.005484000 | -43.147879000 | 22.896001000  | 1 | -17.911507000 | -25.860526000 | 27.849835000 |
| 8  | -11.133910000 | -44.015948000 | 22.829766000  | 1 | -18.644344000 | -28.166647000 | 28.173863000 |
| 6  | -13.098670000 | -43.652320000 | 25.129315000  | 1 | -17.771156000 | -29.206024000 | 29.307538000 |
| 8  | -13.292840000 | -43.216379000 | 26.460278000  | 7 | -14.674037000 | -25.386498000 | 29.548936000 |
| 1  | -11.571231000 | -42.196793000 | 24.750980000  | 6 | -13.377662000 | -25.765709000 | 29.018081000 |
| 1  | -14.045244000 | -43.986094000 | 24.667815000  | 6 | -13.219087000 | -27.204749000 | 28.482590000 |
| 1  | -12.430865000 | -44.519332000 | 25.167731000  | 8 | -12.232935000 | -27.475547000 | 27.800671000 |
| 1  | -13.741941000 | -42.335356000 | 26.447198000  | 1 | -15.049139000 | -25.896221000 | 30.342155000 |
| 7  | -12.623786000 | -42.628754000 | 21.793947000  | 1 | -13.158054000 | -25.097979000 | 28.183572000 |
| 6  | -12.320328000 | -43.090966000 | 20.453051000  | 7 | -14.169964000 | -28.106761000 | 28.833047000 |
| 6  | -13.583560000 | -43.425931000 | 19.630686000  | 6 | -14.160144000 | -29.475109000 | 28.323756000 |
| 6  | -14.375756000 | -44.600847000 | 20.162011000  | 6 | -14.818107000 | -29.583102000 | 26.930206000 |
| 6  | -14.056919000 | -45.912895000 | 19.785731000  | 6 | -14.806651000 | -30.993066000 | 26.378590000 |
| 6  | -15.433567000 | -44.401713000 | 21.060603000  | 6 | -15.692773000 | -31.965003000 | 26.870526000 |
| 6  | -14.771218000 | -46.999778000 | 20.291908000  | 6 | -13.898840000 | -31.364044000 | 25.377586000 |
| 6  | -16.149741000 | -45.487128000 | 21.569330000  | 6 | -15.668154000 | -33.269344000 | 26.370746000 |
| 6  | -15.822142000 | -46.789753000 | 21.187395000  | 6 | -13.872290000 | -32.668970000 | 24.878872000 |
| 1  | -13.383235000 | -41.958865000 | 21.903280000  | 6 | -14.756005000 | -33.630832000 | 25.374198000 |
| 1  | -11.676412000 | -43.967649000 | 20.562687000  | 1 | -14.964335000 | -27.823888000 | 29.397188000 |
| 1  | -14.222411000 | -42.535555000 | 19.595532000  | 1 | -14.697934000 | -30.103300000 | 29.040090000 |
| 1  | -13.260274000 | -43.631108000 | 18.600728000  | 1 | -15.849521000 | -29.216723000 | 27.012663000 |
| 1  | -13.238132000 | -46.084014000 | 19.088839000  | 1 | -14.284355000 | -28.908377000 | 26.251525000 |
| 1  | -15.685714000 | -43.386672000 | 21.356941000  | 1 | -16.397149000 | -31.700051000 | 27.657412000 |
| 1  | -14.507542000 | -48.010067000 | 19.987075000  | 1 | -13.206124000 | -30.620833000 | 24.987048000 |
| 1  | -16.965314000 | -45.313346000 | 22.267502000  | 1 | -16.359925000 | -34.007945000 | 26.766746000 |
| 1  | -16.380118000 | -47.634199000 | 21.584741000  | 1 | -13.159119000 | -32.935944000 | 24.102332000 |
| 6  | -26.538971000 | -41.145008000 | 33.192729000  | 1 | -14.721744000 | -34.651102000 | 24.998910000 |
| 6  | -27.324796000 | -40.867264000 | 31.914843000  | 6 | -19.100722000 | -32.880816000 | 37.357689000 |
| 8  | -28.169522000 | -41.665590000 | 31.472925000  | 6 | -19.068218000 | -34.411884000 | 37.339988000 |
| 6  | -26.361463000 | -42.653498000 | 33.447895000  | 8 | -20.033647000 | -35.100770000 | 37.668704000 |
| 8  | -27.618878000 | -43.300259000 | 33.584048000  | 6 | -18.750856000 | -32.213423000 | 36.013536000 |
| 6  | -25.556661000 | -42.915690000 | 34.715229000  | 6 | -19.790067000 | -32.530953000 | 34.910021000 |
| 1  | -25.561372000 | -40.653079000 | 33.149362000  | 8 | -20.993677000 | -32.499356000 | 35.283768000 |
| 1  | -25.809286000 | -43.076643000 | 32.589307000  | 8 | -19.361346000 | -32.781662000 | 33.747600000 |
| 1  | -28.124058000 | -42.996448000 | 32.800536000  | 1 | -20.116906000 | -32.597395000 | 37.635061000 |
| 1  | -25.455494000 | -43.994401000 | 34.876561000  | 1 | -18.742741000 | -31.124137000 | 36.163796000 |
| 1  | -24.557299000 | -42.473039000 | 34.642634000  | 1 | -17.750701000 | -32.488890000 | 35.660630000 |
| 1  | -26.068927000 | -42.488836000 | 35.585868000  | 7 | -17.873663000 | -34.956753000 | 36.968573000 |
| 7  | -27.053059000 | -39.694809000 | 31.296253000  | 6 | -17.665645000 | -36.377446000 | 36.760638000 |
| 6  | -27.721497000 | -39.311530000 | 30.061117000  | 6 | -16.898955000 | -36.616051000 | 35.453398000 |
| 6  | -27.077366000 | -39.899249000 | 28.785613000  | 8 | -15.704018000 | -35.843386000 | 35.565126000 |
| 6  | -25.609035000 | -39.458064000 | 28.648891000  | 6 | -17.708625000 | -36.263153000 | 34.204642000 |
| 6  | -27.927178000 | -39.520466000 | 27.564180000  | 1 | -17.122147000 | -34.367406000 | 36.634839000 |
| 6  | -24.817787000 | -40.147794000 | 27.531344000  | 1 | -18.644684000 | -36.863004000 | 36.748683000 |
| 1  | -26.364351000 | -39.057030000 | 31.700483000  | 1 | -16.646817000 | -37.691087000 | 35.412085000 |
| 1  | -27.716199000 | -38.215004000 | 30.066680000  | 1 | -15.324039000 | -35.707347000 | 34.668501000 |
| 1  | -27.100765000 | -40.992145000 | 28.899361000  | 1 | -17.096454000 | -36.400559000 | 33.306683000 |
| 1  | -25.574595000 | -38.367243000 | 28.498711000  | 1 | -18.582224000 | -36.920436000 | 34.120271000 |
| 1  | -25.102610000 | -39.653702000 | 29.601576000  | 1 | -18.058449000 | -35.225607000 | 34.227400000 |
| 1  | -27.545358000 | -39.980401000 | 26.646541000  | 6 | -12.930511000 | -35.279183000 | 31.297661000 |
| 1  | -28.967248000 | -39.846492000 | 27.689320000  | 6 | -13.560600000 | -35.980907000 | 32.489255000 |
| 1  | -27.933534000 | -38.432214000 | 27.411151000  | 8 | -14.501982000 | -35.448092000 | 33.097475000 |
| 1  | -23.767086000 | -39.840018000 | 27.563738000  | 1 | -12.843487000 | -34.213374000 | 31.523992000 |
| 1  | -24.851550000 | -41.239269000 | 27.644389000  | 1 | -13.595204000 | -35.380345000 | 30.432509000 |
| 1  | -25.208046000 | -39.904631000 | 26.536057000  | 7 | -13.030107000 | -37.180141000 | 32.806777000 |
| 6  | -26.319484000 | -35.789996000 | 31.887913000  | 6 | -13.546071000 | -38.032431000 | 33.872290000 |
| 6  | -25.260491000 | -36.551270000 | 32.687225000  | 6 | -12.427451000 | -38.896408000 | 34.455245000 |

|    |               |               |              |    |               |               |              |
|----|---------------|---------------|--------------|----|---------------|---------------|--------------|
| 1  | -12.331077000 | -37.588516000 | 32.179752000 | 1  | -14.825386000 | -41.514629000 | 34.439506000 |
| 1  | -14.351484000 | -38.673778000 | 33.484558000 | 1  | -13.986804000 | -44.183052000 | 28.703256000 |
| 1  | -12.825199000 | -39.558071000 | 35.233794000 | 1  | -20.240069000 | -43.801186000 | 27.627736000 |
| 1  | -11.963953000 | -39.516980000 | 33.679491000 | 6  | -16.445725000 | -35.833849000 | 28.934648000 |
| 1  | -11.644370000 | -38.273764000 | 34.902186000 | 6  | -18.533331000 | -36.635219000 | 29.126018000 |
| 6  | -9.970302000  | -37.802586000 | 28.915138000 | 6  | -19.893234000 | -36.904937000 | 29.360435000 |
| 6  | -11.187036000 | -38.238049000 | 29.739445000 | 6  | -18.254432000 | -38.833478000 | 28.041287000 |
| 8  | -11.075881000 | -38.351754000 | 30.973168000 | 6  | -17.729612000 | -37.602917000 | 28.459078000 |
| 6  | -10.202857000 | -37.163223000 | 27.536255000 | 6  | -17.692079000 | -35.508313000 | 29.427795000 |
| 6  | -10.876352000 | -35.774147000 | 27.537956000 | 6  | -20.398481000 | -38.130877000 | 28.950378000 |
| 6  | -9.979095000  | -34.701209000 | 28.174686000 | 6  | -19.597215000 | -39.090607000 | 28.296566000 |
| 6  | -11.275091000 | -35.373341000 | 26.109963000 | 7  | -16.460376000 | -37.084775000 | 28.351536000 |
| 1  | -9.386745000  | -37.142585000 | 29.564253000 | 1  | -15.659841000 | -37.553949000 | 27.910440000 |
| 1  | -9.226995000  | -37.073197000 | 27.036374000 | 6  | -18.144231000 | -34.264079000 | 30.141864000 |
| 1  | -10.784191000 | -37.848396000 | 26.903482000 | 6  | -17.032429000 | -33.470354000 | 30.850180000 |
| 1  | -11.798027000 | -35.839619000 | 28.134326000 | 7  | -17.587416000 | -32.343398000 | 31.592599000 |
| 1  | -10.480702000 | -33.726754000 | 28.174475000 | 6  | -17.762642000 | -31.131228000 | 31.049889000 |
| 1  | -9.717909000  | -34.936516000 | 29.212980000 | 8  | -17.376407000 | -30.830724000 | 29.894755000 |
| 1  | -9.042342000  | -34.593009000 | 27.610286000 | 6  | -18.454326000 | -30.106276000 | 31.929851000 |
| 1  | -11.719045000 | -34.371872000 | 26.093204000 | 1  | -18.060102000 | -32.540259000 | 32.487458000 |
| 1  | -10.395588000 | -35.360631000 | 25.450112000 | 8  | -21.738452000 | -38.476291000 | 29.124492000 |
| 1  | -12.013805000 | -36.064431000 | 25.687470000 | 6  | -22.387646000 | -38.087142000 | 30.250932000 |
| 7  | -12.305502000 | -38.547243000 | 29.059931000 | 1  | -15.530695000 | -35.257441000 | 28.945646000 |
| 6  | -13.507731000 | -39.158289000 | 29.628331000 | 1  | -20.532732000 | -36.166642000 | 29.832899000 |
| 6  | -14.063774000 | -40.229014000 | 28.682038000 | 1  | -17.630597000 | -39.576502000 | 27.554864000 |
| 6  | -14.242255000 | -39.755018000 | 27.230147000 | 1  | -20.049560000 | -40.034191000 | 28.008974000 |
| 8  | -14.313152000 | -38.484955000 | 27.049359000 | 1  | -18.893240000 | -34.538298000 | 30.896410000 |
| 8  | -14.292044000 | -40.613977000 | 26.319735000 | 1  | -18.653996000 | -33.579633000 | 29.447668000 |
| 1  | -12.398814000 | -38.293508000 | 28.083673000 | 1  | -16.485668000 | -34.108560000 | 31.552416000 |
| 1  | -14.262952000 | -38.387996000 | 29.820472000 | 1  | -16.319070000 | -33.072926000 | 30.123222000 |
| 1  | -13.408953000 | -41.106745000 | 28.669607000 | 1  | -17.784541000 | -29.250937000 | 32.070167000 |
| 1  | -15.038904000 | -40.562994000 | 29.063202000 | 1  | -18.755987000 | -30.526271000 | 32.890987000 |
| 8  | -17.145094000 | -41.082962000 | 30.223366000 | 1  | -19.346535000 | -29.739458000 | 31.410207000 |
| 1  | -12.707364000 | -42.399540000 | 33.064198000 | 1  | -23.465106000 | -38.060699000 | 30.147394000 |
| 1  | -12.359222000 | -43.609756000 | 30.658502000 | 1  | -21.872239000 | -37.440648000 | 30.951501000 |
| 1  | -19.481278000 | -40.279659000 | 35.242605000 | 1  | -17.979412000 | -40.558006000 | 30.143430000 |
| 1  | -16.819994000 | -40.496946000 | 35.709503000 | 6  | -19.412609000 | -45.031891000 | 32.951295000 |
| 1  | -22.663399000 | -41.622624000 | 31.288390000 | 16 | -17.708571000 | -44.755369000 | 32.340464000 |
| 1  | -22.329199000 | -42.862446000 | 28.88540000  | 1  | -19.862445000 | -44.052752000 | 33.148821000 |
| 1  | -18.214168000 | -44.783663000 | 26.245663000 | 1  | -19.338061000 | -45.557176000 | 33.910021000 |
| 1  | -15.529982000 | -44.905803000 | 26.694587000 | 6  | -17.192824000 | -40.142545000 | 22.299609000 |
| 6  | -20.270809000 | -45.799518000 | 32.074576000 | 6  | -15.679443000 | -40.044819000 | 22.144801000 |
| 1  | -19.861575000 | -46.798754000 | 31.887601000 | 8  | -15.031096000 | -40.983784000 | 21.655409000 |
| 1  | -21.263892000 | -45.916906000 | 32.528643000 | 6  | -17.642867000 | -41.289421000 | 23.231855000 |
| 1  | -20.387955000 | -45.294736000 | 31.112051000 | 6  | -19.147422000 | -41.562931000 | 23.030613000 |
| 1  | -17.084863000 | -36.802533000 | 37.593072000 | 6  | -17.291723000 | -40.980013000 | 24.694294000 |
| 1  | -23.764729000 | -36.428305000 | 35.417925000 | 6  | -19.680433000 | -42.784538000 | 23.788592000 |
| 1  | -27.288339000 | -36.139212000 | 32.271964000 | 1  | -17.613404000 | -39.190758000 | 22.649833000 |
| 1  | -27.093347000 | -40.712876000 | 34.038196000 | 1  | -17.091737000 | -42.188390000 | 22.921520000 |
| 1  | -28.763340000 | -39.642666000 | 30.123567000 | 1  | -19.717631000 | -40.671836000 | 23.332873000 |
| 1  | -11.747699000 | -42.324666000 | 19.907222000 | 1  | -19.341422000 | -41.701712000 | 21.956914000 |
| 1  | -13.157847000 | -41.741701000 | 24.110947000 | 1  | -17.510527000 | -41.828515000 | 25.350887000 |
| 1  | -17.632882000 | -40.272791000 | 21.340379000 | 1  | -16.230813000 | -40.747179000 | 24.831995000 |
| 1  | -13.214143000 | -39.398991000 | 22.032670000 | 1  | -17.873180000 | -40.120591000 | 25.056567000 |
| 1  | -13.232947000 | -39.603541000 | 30.586817000 | 1  | -20.737277000 | -42.960450000 | 23.554394000 |
| 1  | -9.361722000  | -38.709968000 | 28.791011000 | 1  | -19.123660000 | -43.690634000 | 23.514925000 |
| 1  | -11.950714000 | -35.686989000 | 31.037664000 | 1  | -19.597889000 | -42.657880000 | 24.873088000 |
| 1  | -13.985486000 | -37.392276000 | 34.640952000 | 7  | -15.122259000 | -38.871035000 | 22.515944000 |
| 1  | -18.411096000 | -32.530321000 | 38.140308000 | 6  | -13.693347000 | -38.590269000 | 22.512407000 |
| 1  | -13.121250000 | -29.811016000 | 28.268737000 | 6  | -13.190261000 | -38.387991000 | 23.942507000 |
| 1  | -17.438841000 | -23.704787000 | 29.073047000 | 8  | -13.997183000 | -37.413116000 | 24.582678000 |
| 1  | -12.602827000 | -25.613912000 | 29.779595000 | 1  | -15.658835000 | -38.235411000 | 23.094416000 |
| 8  | -23.128950000 | -39.711826000 | 32.879956000 | 1  | -13.519172000 | -37.679214000 | 21.924401000 |
| 1  | -23.851249000 | -39.052395000 | 32.942339000 | 1  | -13.244626000 | -39.337292000 | 24.487379000 |
| 1  | -22.686342000 | -39.452760000 | 32.047944000 | 1  | -12.135863000 | -38.066057000 | 23.903484000 |
| 6  | -19.590710000 | -43.535098000 | 28.457267000 | 1  | -14.217701000 | -37.786861000 | 25.479821000 |
| 6  | -20.227757000 | -41.403016000 | 32.753346000 | 6  | -12.440802000 | -42.581424000 | 24.251428000 |
| 6  | -15.479013000 | -41.817184000 | 33.626465000 | 6  | -11.967260000 | -43.158249000 | 22.922199000 |
| 6  | -14.838824000 | -43.886874000 | 29.306752000 | 8  | -11.090576000 | -44.022143000 | 22.870734000 |
| 6  | -20.178456000 | -42.891284000 | 29.539688000 | 6  | -13.070318000 | -43.658769000 | 25.150991000 |
| 6  | -21.585087000 | -42.579905000 | 29.645097000 | 8  | -13.287047000 | -43.212440000 | 26.475248000 |
| 6  | -21.765616000 | -41.975859000 | 30.852542000 | 1  | -11.561633000 | -42.183610000 | 24.772084000 |
| 6  | -20.465398000 | -41.923058000 | 31.479352000 | 1  | -14.006081000 | -44.013097000 | 24.682674000 |
| 6  | -18.991976000 | -41.378839000 | 33.385907000 | 1  | -12.388844000 | -44.514118000 | 25.205523000 |
| 6  | -18.752809000 | -40.803596000 | 34.686450000 | 1  | -13.742921000 | -42.335052000 | 26.447811000 |
| 6  | -17.418099000 | -40.918600000 | 34.929362000 | 7  | -12.574966000 | -42.647638000 | 21.810381000 |
| 6  | -16.833659000 | -41.565714000 | 33.780316000 | 6  | -12.254980000 | -43.116046000 | 20.475500000 |
| 6  | -14.883524000 | -42.424444000 | 32.523549000 | 6  | -13.508327000 | -43.458530000 | 19.641160000 |
| 6  | -13.464644000 | -42.670718000 | 32.388494000 | 6  | -14.303724000 | -44.632314000 | 20.170218000 |
| 6  | -13.286001000 | -43.257899000 | 31.173600000 | 6  | -13.977086000 | -45.945660000 | 19.805327000 |
| 6  | -14.595571000 | -43.369546000 | 30.571908000 | 6  | -15.372752000 | -44.430763000 | 21.054983000 |
| 6  | -16.092451000 | -43.984738000 | 28.705967000 | 6  | -14.694533000 | -47.031509000 | 20.309242000 |
| 6  | -16.306728000 | -44.500308000 | 27.375160000 | 6  | -16.092092000 | -45.515180000 | 21.561347000 |
| 6  | -17.647658000 | -44.427441000 | 27.145192000 | 6  | -15.756587000 | -46.819113000 | 21.190915000 |
| 6  | -18.238901000 | -43.845185000 | 28.328078000 | 1  | -13.338886000 | -41.981019000 | 21.907696000 |
| 7  | -19.512267000 | -42.477156000 | 30.668044000 | 1  | -11.610097000 | -43.990461000 | 20.596928000 |
| 7  | -17.813148000 | -41.859520000 | 32.853851000 | 1  | -14.148697000 | -42.569803000 | 19.594001000 |
| 7  | -15.551032000 | -42.860390000 | 31.414077000 | 1  | -13.173291000 | -43.668609000 | 18.615960000 |
| 7  | -17.277272000 | -43.601243000 | 29.269206000 | 1  | -13.149662000 | -46.118597000 | 19.119168000 |
| 26 | -17.522397000 | -42.634036000 | 31.023874000 | 1  | -15.631182000 | -43.414735000 | 21.342428000 |
| 1  | -21.074310000 | -40.961953000 | 33.273092000 | 1  | -14.424618000 | -48.042829000 | 20.013434000 |
|    |               |               |              | 1  | -16.916419000 | -45.339638000 | 22.248711000 |
|    |               |               |              | 1  | -16.317048000 | -47.662722000 | 21.586526000 |

|   |               |               |              |   |               |               |              |
|---|---------------|---------------|--------------|---|---------------|---------------|--------------|
| 6 | -26.546379000 | -41.114774000 | 33.203525000 | 1 | -14.740272000 | -34.643869000 | 24.984587000 |
| 6 | -27.338145000 | -40.832592000 | 31.930258000 | 6 | -19.066177000 | -32.914965000 | 37.380344000 |
| 8 | -28.186104000 | -41.628752000 | 31.490518000 | 6 | -19.044870000 | -34.446181000 | 37.356976000 |
| 6 | -26.366974000 | -42.624197000 | 33.451975000 | 8 | -20.013932000 | -35.129225000 | 37.687333000 |
| 8 | -27.623413000 | -43.272134000 | 33.591380000 | 6 | -18.713682000 | -32.244712000 | 36.038309000 |
| 6 | -25.556216000 | -42.890933000 | 34.714567000 | 6 | -19.757591000 | -32.548924000 | 34.935415000 |
| 1 | -25.569284000 | -40.622147000 | 33.157680000 | 8 | -20.960202000 | -32.509471000 | 35.311650000 |
| 1 | -25.818521000 | -43.043716000 | 32.589211000 | 8 | -19.333097000 | -32.797110000 | 33.770924000 |
| 1 | -28.132590000 | -42.964971000 | 32.811746000 | 1 | -20.079792000 | -32.625139000 | 37.660519000 |
| 1 | -25.453568000 | -43.970206000 | 34.871137000 | 1 | -18.696602000 | -31.156162000 | 36.193119000 |
| 1 | -24.557491000 | -42.447294000 | 34.639184000 | 1 | -17.716474000 | -32.526521000 | 35.682110000 |
| 1 | -26.064805000 | -42.467922000 | 35.589221000 | 7 | -17.855783000 | -34.998340000 | 36.979109000 |
| 7 | -27.068124000 | -39.658888000 | 31.313367000 | 6 | -17.658247000 | -36.419782000 | 36.766135000 |
| 6 | -27.742412000 | -39.271933000 | 30.082574000 | 6 | -16.895405000 | -36.659286000 | 35.456725000 |
| 6 | -27.107196000 | -39.859898000 | 28.802732000 | 8 | -15.695446000 | -35.894220000 | 35.568443000 |
| 6 | -25.638220000 | -39.423245000 | 28.658825000 | 6 | -17.705426000 | -36.297514000 | 34.210743000 |
| 6 | -27.962348000 | -39.476592000 | 27.586453000 | 1 | -17.101087000 | -34.413318000 | 36.644941000 |
| 6 | -24.854855000 | -40.114506000 | 27.536654000 | 1 | -18.640641000 | -36.898518000 | 36.754062000 |
| 1 | -26.376968000 | -39.022800000 | 31.716243000 | 1 | -16.650009000 | -37.735709000 | 35.411815000 |
| 1 | -27.734048000 | -38.175362000 | 30.029636000 | 1 | -15.319744000 | -35.751875000 | 34.670975000 |
| 1 | -27.133584000 | -40.952853000 | 28.915112000 | 1 | -17.096278000 | -36.436416000 | 33.310992000 |
| 1 | -25.601101000 | -38.332420000 | 28.509358000 | 1 | -18.583505000 | -36.948818000 | 34.126611000 |
| 1 | -25.127492000 | -39.621275000 | 29.608702000 | 1 | -18.048360000 | -35.257735000 | 34.237192000 |
| 1 | -27.586950000 | -39.936387000 | 26.660870000 | 6 | -12.937178000 | -35.289721000 | 31.297045000 |
| 1 | -29.002763000 | -39.799499000 | 27.716724000 | 6 | -13.562201000 | -36.002531000 | 32.484814000 |
| 1 | -27.966068000 | -38.388101000 | 27.435030000 | 8 | -14.503094000 | -35.476724000 | 33.099898000 |
| 1 | -23.803134000 | -39.809655000 | 27.563777000 | 1 | -12.851457000 | -34.225672000 | 31.532015000 |
| 1 | -24.891235000 | -41.205966000 | 27.649080000 | 1 | -13.604729000 | -35.384856000 | 30.433397000 |
| 1 | -25.249634000 | -39.869513000 | 26.543590000 | 7 | -13.028113000 | -37.203038000 | 32.791080000 |
| 6 | -26.315414000 | -35.757388000 | 31.914889000 | 6 | -13.538773000 | -38.065671000 | 33.850930000 |
| 6 | -25.258499000 | -36.526840000 | 32.708995000 | 6 | -12.415120000 | -38.927692000 | 34.427117000 |
| 8 | -25.157270000 | -37.763144000 | 32.531758000 | 1 | -12.329596000 | -37.603987000 | 32.158743000 |
| 6 | -26.294642000 | -34.218677000 | 31.913873000 | 1 | -14.340865000 | -38.708809000 | 33.459358000 |
| 6 | -25.081761000 | -33.520345000 | 31.255396000 | 1 | -12.808678000 | -39.595582000 | 35.202464000 |
| 6 | -24.850115000 | -33.985666000 | 29.809921000 | 1 | -11.950335000 | -39.542074000 | 33.647236000 |
| 6 | -25.276216000 | -31.997247000 | 31.312235000 | 1 | -11.634175000 | -38.304008000 | 34.876372000 |
| 1 | -26.257083000 | -36.142901000 | 30.891124000 | 6 | -9.980704000  | -37.794014000 | 28.875979000 |
| 1 | -27.202942000 | -33.888608000 | 31.387873000 | 6 | -11.193341000 | -38.230568000 | 29.705636000 |
| 1 | -26.406201000 | -33.848468000 | 32.943173000 | 8 | -11.075623000 | -38.346848000 | 30.938440000 |
| 1 | -24.178749000 | -33.748301000 | 31.835510000 | 6 | -10.219996000 | -37.151919000 | 27.499578000 |
| 1 | -24.030057000 | -33.421579000 | 29.351139000 | 6 | -10.895501000 | -35.763857000 | 27.506812000 |
| 1 | -24.582108000 | -35.046652000 | 29.752683000 | 6 | -9.998920000  | -34.691406000 | 28.145281000 |
| 1 | -25.747389000 | -33.829201000 | 29.194387000 | 6 | -11.297054000 | -35.359615000 | 26.080566000 |
| 1 | -24.406173000 | -31.476171000 | 30.897089000 | 1 | -9.393692000  | -37.135467000 | 29.523445000 |
| 1 | -26.160540000 | -31.688395000 | 30.736921000 | 1 | -9.246307000  | -37.059454000 | 26.995902000 |
| 1 | -25.406680000 | -31.652067000 | 32.344643000 | 1 | -10.803003000 | -37.836557000 | 26.867736000 |
| 7 | -24.521515000 | -35.839572000 | 33.580803000 | 1 | -11.816045000 | -35.832544000 | 28.104577000 |
| 6 | -23.409388000 | -36.324633000 | 34.397816000 | 1 | -10.501676000 | -33.717544000 | 28.147749000 |
| 6 | -22.273449000 | -35.282258000 | 34.315331000 | 1 | -9.736672000  | -34.928836000 | 29.182815000 |
| 8 | -22.903545000 | -34.010996000 | 34.371638000 | 1 | -9.062744000  | -34.580784000 | 27.580380000 |
| 6 | -21.432245000 | -35.421674000 | 33.042745000 | 1 | -11.744776000 | -34.359773000 | 26.067538000 |
| 1 | -24.593455000 | -34.827783000 | 33.629493000 | 1 | -10.418094000 | -35.341314000 | 25.420114000 |
| 1 | -23.092490000 | -37.308077000 | 34.045182000 | 1 | -12.033266000 | -36.052310000 | 25.656277000 |
| 1 | -21.626389000 | -35.421608000 | 35.193232000 | 7 | -12.315716000 | -38.537511000 | 29.031422000 |
| 1 | -22.191491000 | -33.345672000 | 34.622662000 | 6 | -13.514854000 | -39.150093000 | 29.604633000 |
| 1 | -20.701231000 | -34.607148000 | 33.004362000 | 6 | -14.070041000 | -40.225587000 | 28.663295000 |
| 1 | -20.895057000 | -36.379139000 | 33.022472000 | 6 | -14.253211000 | -39.757162000 | 27.210227000 |
| 1 | -22.071357000 | -35.358631000 | 32.151624000 | 8 | -14.328461000 | -38.488290000 | 27.024493000 |
| 6 | -17.048251000 | -24.661033000 | 29.401721000 | 8 | -14.302314000 | -40.620108000 | 26.303292000 |
| 6 | -15.654755000 | -24.728488000 | 28.769403000 | 1 | -12.413030000 | -38.284108000 | 28.055459000 |
| 8 | -15.425344000 | -24.238854000 | 27.667503000 | 1 | -14.271919000 | -38.381460000 | 29.795880000 |
| 6 | -17.940816000 | -25.830882000 | 28.953503000 | 1 | -13.412555000 | -41.101341000 | 28.651999000 |
| 6 | -17.494173000 | -27.180103000 | 29.530463000 | 1 | -15.043175000 | -40.561084000 | 29.048088000 |
| 8 | -16.683341000 | -27.242826000 | 30.470288000 | 8 | -17.152782000 | -41.063151000 | 30.244922000 |
| 7 | -18.024927000 | -28.277443000 | 28.965758000 | 1 | -12.720037000 | -42.414689000 | 33.131820000 |
| 1 | -16.987503000 | -24.654805000 | 30.494313000 | 1 | -12.365284000 | -43.584289000 | 30.707100000 |
| 1 | -18.973848000 | -25.648472000 | 29.280438000 | 1 | -19.517421000 | -40.356720000 | 35.308879000 |
| 1 | -17.963051000 | -25.885394000 | 27.857989000 | 1 | -16.861985000 | -40.586927000 | 35.797098000 |
| 1 | -18.673994000 | -28.196412000 | 28.196352000 | 1 | -22.671276000 | -41.589498000 | 31.301487000 |
| 1 | -17.780954000 | -29.225013000 | 29.324165000 | 1 | -22.324527000 | -42.799189000 | 28.884960000 |
| 7 | -14.715350000 | -25.376731000 | 29.526263000 | 1 | -18.197369000 | -44.710957000 | 26.256361000 |
| 6 | -13.420458000 | -25.745769000 | 28.984739000 | 1 | -15.514180000 | -44.833952000 | 26.720161000 |
| 6 | -13.255006000 | -27.183971000 | 28.449047000 | 6 | -20.285487000 | -45.825396000 | 31.973229000 |
| 8 | -12.273516000 | -27.447356000 | 27.757559000 | 1 | -19.860480000 | -46.816952000 | 31.780563000 |
| 1 | -15.079534000 | -25.888661000 | 30.323207000 | 1 | -21.292245000 | -45.960994000 | 32.390570000 |
| 1 | -13.213307000 | -25.077015000 | 28.147870000 | 1 | -20.374756000 | -45.302326000 | 31.017540000 |
| 7 | -14.194854000 | -28.093354000 | 28.810045000 | 1 | -17.079171000 | -36.851737000 | 37.596254000 |
| 6 | -14.179608000 | -29.461981000 | 28.301687000 | 1 | -23.753472000 | -36.419940000 | 35.435168000 |
| 6 | -14.850780000 | -29.575975000 | 26.914935000 | 1 | -27.285133000 | -36.102214000 | 32.300694000 |
| 6 | -14.835003000 | -30.986201000 | 26.364123000 | 1 | -27.097127000 | -40.686266000 | 34.053179000 |
| 6 | -15.710055000 | -31.963636000 | 26.864878000 | 1 | -28.784925000 | -39.599981000 | 30.150287000 |
| 6 | -13.934303000 | -31.351737000 | 25.354724000 | 1 | -11.678235000 | -42.351144000 | 19.932060000 |
| 6 | -15.681950000 | -33.267953000 | 26.365284000 | 1 | -13.149415000 | -41.758427000 | 24.115150000 |
| 6 | -13.904118000 | -32.656640000 | 24.856189000 | 1 | -17.587984000 | -40.319159000 | 21.290220000 |
| 6 | -14.777062000 | -33.623812000 | 25.360172000 | 1 | -13.180388000 | -39.421164000 | 22.023284000 |
| 1 | -14.985778000 | -27.816056000 | 29.381754000 | 1 | -13.236552000 | -39.591339000 | 30.563918000 |
| 1 | -14.705223000 | -30.093781000 | 29.023805000 | 1 | -9.373031000  | -38.701324000 | 28.746992000 |
| 1 | -15.883923000 | -29.216941000 | 27.007495000 | 1 | -11.957566000 | -35.693556000 | 31.030275000 |
| 1 | -14.328790000 | -28.897965000 | 26.230419000 | 1 | -13.980925000 | -37.433304000 | 34.624427000 |
| 1 | -16.408443000 | -31.703108000 | 27.658544000 | 1 | -18.372797000 | -32.572611000 | 38.163266000 |
| 1 | -13.250185000 | -30.604232000 | 24.957293000 | 1 | -13.138783000 | -29.789997000 | 28.236430000 |
| 1 | -16.365326000 | -34.010723000 | 26.767965000 | 1 | -17.499502000 | -23.721532000 | 29.070390000 |
| 1 | -13.196657000 | -32.919350000 | 24.072999000 | 1 | -12.640513000 | -25.587045000 | 29.739596000 |

|   |               |               |              |
|---|---------------|---------------|--------------|
| 8 | -23.131399000 | -39.686755000 | 32.883034000 |
| 1 | -23.854977000 | -39.028924000 | 32.947754000 |
| 1 | -22.690238000 | -39.424931000 | 32.051061000 |

**21M2Hy,III**

|    |               |               |              |
|----|---------------|---------------|--------------|
| 6  | -21.208411000 | -44.841171000 | 29.763317000 |
| 6  | -21.125938000 | -42.373694000 | 33.939025000 |
| 6  | -16.358644000 | -41.707745000 | 33.381946000 |
| 6  | -16.620372000 | -43.545214000 | 28.913668000 |
| 6  | -21.589739000 | -44.277402000 | 30.976799000 |
| 6  | -22.927265000 | -44.319316000 | 31.513551000 |
| 6  | -22.914906000 | -43.593821000 | 32.669628000 |
| 6  | -21.563725000 | -43.121352000 | 32.848720000 |
| 6  | -19.807002000 | -41.994942000 | 34.160084000 |
| 6  | -19.344955000 | -41.286827000 | 35.329235000 |
| 6  | -17.997779000 | -41.139782000 | 35.191493000 |
| 6  | -17.637646000 | -41.737185000 | 33.927382000 |
| 6  | -16.020081000 | -42.147142000 | 32.108748000 |
| 6  | -14.708744000 | -42.001403000 | 31.514879000 |
| 6  | -14.792034000 | -42.481874000 | 30.244564000 |
| 6  | -16.153128000 | -42.938687000 | 30.071140000 |
| 6  | -17.895643000 | -44.077304000 | 28.765742000 |
| 6  | -18.345986000 | -44.800896000 | 27.599942000 |
| 6  | -19.622680000 | -45.199695000 | 27.855479000 |
| 6  | -19.959474000 | -44.704799000 | 29.170567000 |
| 7  | -20.770858000 | -43.543747000 | 31.805517000 |
| 7  | -18.751586000 | -42.258899000 | 33.315977000 |
| 7  | -16.884784000 | -42.722424000 | 31.212014000 |
| 7  | -18.892633000 | -44.027393000 | 29.707931000 |
| 26 | -18.790797000 | -43.244522000 | 31.564487000 |
| 1  | -21.868218000 | -42.072090000 | 34.671404000 |
| 1  | -15.573251000 | -41.254279000 | 33.979287000 |
| 1  | -15.921603000 | -43.622903000 | 28.086160000 |
| 1  | -21.965085000 | -45.391820000 | 29.212066000 |
| 6  | -16.005625000 | -35.196418000 | 27.763414000 |
| 6  | -17.523152000 | -36.489783000 | 28.808185000 |
| 6  | -18.550805000 | -37.079213000 | 29.566659000 |
| 6  | -16.815050000 | -38.715648000 | 28.007271000 |
| 6  | -16.660782000 | -37.324094000 | 28.042713000 |
| 6  | -17.091322000 | -35.128388000 | 28.612738000 |
| 6  | -18.688671000 | -38.458610000 | 29.534265000 |
| 6  | -17.841609000 | -39.278255000 | 28.757283000 |
| 7  | -15.745258000 | -36.507171000 | 27.413267000 |
| 1  | -14.963382000 | -36.847279000 | 26.853002000 |
| 6  | -17.717292000 | -33.917299000 | 29.251158000 |
| 6  | -16.918354000 | -33.354610000 | 30.452408000 |
| 7  | -17.712704000 | -32.450793000 | 31.276408000 |
| 6  | -17.860107000 | -31.148019000 | 31.017288000 |
| 8  | -17.303793000 | -30.564856000 | 30.053130000 |
| 6  | -18.741320000 | -30.379063000 | 31.984655000 |
| 1  | -18.255140000 | -32.856958000 | 32.057495000 |
| 8  | -19.727931000 | -39.006185000 | 30.294370000 |
| 6  | -19.389308000 | -40.046553000 | 31.165076000 |
| 1  | -15.397709000 | -34.396181000 | 27.361481000 |
| 1  | -19.221859000 | -36.491512000 | 30.185865000 |
| 1  | -16.166543000 | -39.346148000 | 27.407110000 |
| 1  | -17.997093000 | -40.350670000 | 28.752041000 |
| 1  | -18.718643000 | -34.184184000 | 29.609450000 |
| 1  | -17.857795000 | -33.108081000 | 28.523503000 |
| 1  | -16.569554000 | -34.166868000 | 31.095172000 |
| 1  | -16.037071000 | -32.815832000 | 30.092855000 |
| 1  | -18.126517000 | -29.635438000 | 32.504237000 |
| 1  | -19.229124000 | -31.037825000 | 32.705327000 |
| 1  | -19.504889000 | -29.835855000 | 31.417373000 |
| 1  | -20.131015000 | -40.031871000 | 31.967799000 |
| 1  | -18.377719000 | -39.933272000 | 31.558725000 |
| 1  | -20.307472000 | -41.515560000 | 30.229385000 |
| 6  | -19.093992000 | -45.588213000 | 33.924875000 |
| 16 | -18.132079000 | -45.205791000 | 32.401568000 |
| 1  | -19.521101000 | -44.662942000 | 34.316235000 |
| 1  | -18.363630000 | -45.944593000 | 34.662082000 |
| 6  | -16.922259000 | -40.651638000 | 21.955193000 |
| 6  | -15.411635000 | -40.829694000 | 21.868746000 |
| 8  | -14.910204000 | -41.962348000 | 21.804225000 |
| 6  | -17.522405000 | -41.031173000 | 23.330518000 |
| 6  | -19.053254000 | -41.173742000 | 23.199137000 |
| 6  | -17.114523000 | -40.017569000 | 24.408270000 |
| 6  | -19.765159000 | -41.662216000 | 24.466622000 |
| 1  | -17.206345000 | -39.620388000 | 21.705643000 |
| 1  | -17.115169000 | -42.015530000 | 23.604045000 |
| 1  | -19.477637000 | -40.204410000 | 22.895329000 |
| 1  | -19.269351000 | -41.872411000 | 22.377560000 |
| 1  | -17.534934000 | -40.277940000 | 25.383916000 |
| 1  | -16.029200000 | -39.964488000 | 24.540991000 |
| 1  | -17.482664000 | -39.013315000 | 24.153777000 |
| 1  | -20.831017000 | -41.831591000 | 24.272083000 |
| 1  | -19.339213000 | -42.607298000 | 24.826835000 |
| 1  | -19.691696000 | -40.937391000 | 25.283504000 |
| 7  | -14.682513000 | -39.690101000 | 21.814844000 |
| 6  | -13.227106000 | -39.638359000 | 21.809379000 |
| 6  | -12.698741000 | -39.089777000 | 23.135540000 |
| 8  | -13.351408000 | -37.862326000 | 23.413460000 |
| 1  | -15.120735000 | -38.824386000 | 22.105444000 |

|   |               |               |              |
|---|---------------|---------------|--------------|
| 1 | -12.909868000 | -38.986406000 | 20.984582000 |
| 1 | -12.896275000 | -39.814111000 | 23.933046000 |
| 1 | -11.606393000 | -38.955247000 | 23.050452000 |
| 1 | -13.541191000 | -37.867410000 | 24.387713000 |
| 6 | -12.593903000 | -43.101739000 | 24.891940000 |
| 6 | -12.297304000 | -44.167423000 | 23.843530000 |
| 8 | -11.605975000 | -45.152597000 | 24.103698000 |
| 6 | -13.556521000 | -43.631430000 | 25.970761000 |
| 8 | -13.713966000 | -42.732047000 | 27.052446000 |
| 1 | -11.648984000 | -42.835861000 | 25.378265000 |
| 1 | -14.525179000 | -43.870625000 | 25.499498000 |
| 1 | -13.153945000 | -44.562687000 | 26.381898000 |
| 1 | -13.933987000 | -41.836870000 | 26.693331000 |
| 7 | -12.866711000 | -43.958025000 | 22.619503000 |
| 6 | -12.767500000 | -44.931901000 | 21.549361000 |
| 6 | -14.137034000 | -45.277923000 | 20.925390000 |
| 6 | -15.101661000 | -45.951890000 | 21.877870000 |
| 6 | -15.049480000 | -47.335613000 | 22.096054000 |
| 6 | -16.058325000 | -45.201584000 | 22.576210000 |
| 6 | -15.925534000 | -47.956336000 | 22.987499000 |
| 6 | -16.938696000 | -45.820169000 | 23.467053000 |
| 6 | -16.875688000 | -47.199387000 | 23.676756000 |
| 1 | -13.470699000 | -43.152480000 | 22.469152000 |
| 1 | -12.292731000 | -45.818745000 | 21.977582000 |
| 1 | -14.586155000 | -44.355326000 | 20.539715000 |
| 1 | -13.949063000 | -45.930628000 | 20.061445000 |
| 1 | -14.312059000 | -47.932742000 | 21.562221000 |
| 1 | -16.100799000 | -44.127282000 | 22.416262000 |
| 1 | -15.866919000 | -49.030980000 | 23.144011000 |
| 1 | -17.678336000 | -45.222396000 | 23.994960000 |
| 1 | -17.559276000 | -47.679942000 | 24.372124000 |
| 6 | -27.305573000 | -41.749914000 | 33.057855000 |
| 6 | -27.356839000 | -41.697111000 | 31.534081000 |
| 8 | -27.945706000 | -42.566629000 | 30.867891000 |
| 6 | -27.374372000 | -43.192768000 | 33.590359000 |
| 8 | -28.580809000 | -43.830430000 | 33.196897000 |
| 6 | -27.291530000 | -43.229890000 | 35.111709000 |
| 1 | -26.396684000 | -41.261611000 | 33.424724000 |
| 1 | -26.506606000 | -43.742565000 | 33.180839000 |
| 1 | -28.630214000 | -43.657900000 | 32.232441000 |
| 1 | -27.347606000 | -44.265346000 | 35.465106000 |
| 1 | -26.353299000 | -42.784073000 | 35.459750000 |
| 1 | -28.130001000 | -42.675536000 | 35.550615000 |
| 7 | -26.734735000 | -40.639375000 | 30.962245000 |
| 6 | -26.690049000 | -40.462395000 | 29.518182000 |
| 6 | -25.380240000 | -40.953080000 | 28.862969000 |
| 6 | -24.173461000 | -40.100727000 | 29.303286000 |
| 6 | -25.551068000 | -40.977249000 | 27.336524000 |
| 6 | -22.804562000 | -40.670649000 | 28.910608000 |
| 1 | -26.262920000 | -39.954422000 | 31.557328000 |
| 1 | -26.837026000 | -39.396478000 | 29.292513000 |
| 1 | -25.221677000 | -41.984053000 | 29.211507000 |
| 1 | -24.280988000 | -39.090193000 | 28.878397000 |
| 1 | -24.201529000 | -39.973447000 | 30.392484000 |
| 1 | -24.658060000 | -41.363021000 | 26.834193000 |
| 1 | -26.396875000 | -41.611532000 | 27.044089000 |
| 1 | -25.739089000 | -39.967287000 | 26.946565000 |
| 1 | -21.997932000 | -40.020758000 | 29.268916000 |
| 1 | -22.664846000 | -41.672912000 | 29.339141000 |
| 1 | -22.688206000 | -40.759775000 | 27.824480000 |
| 6 | -26.332558000 | -36.738789000 | 31.676620000 |
| 6 | -25.318650000 | -37.429408000 | 32.590331000 |
| 8 | -25.287432000 | -38.682830000 | 32.613040000 |
| 6 | -26.239748000 | -35.218182000 | 31.461982000 |
| 6 | -25.012279000 | -34.686180000 | 30.686404000 |
| 6 | -24.919672000 | -35.271598000 | 29.269399000 |
| 6 | -25.059900000 | -33.151295000 | 30.638021000 |
| 1 | -26.284633000 | -37.267449000 | 30.718334000 |
| 1 | -27.144975000 | -34.911715000 | 30.916770000 |
| 1 | -26.300743000 | -34.707017000 | 32.433473000 |
| 1 | -24.099446000 | -34.959841000 | 31.230177000 |
| 1 | -24.063506000 | -34.847352000 | 28.732710000 |
| 1 | -24.788830000 | -36.359589000 | 29.276302000 |
| 1 | -25.824554000 | -35.044454000 | 28.687857000 |
| 1 | -24.186354000 | -32.749379000 | 30.112429000 |
| 1 | -25.960110000 | -32.798677000 | 30.114650000 |
| 1 | -25.063472000 | -32.724312000 | 31.647531000 |
| 7 | -24.544883000 | -36.657512000 | 33.349534000 |
| 6 | -23.448231000 | -37.068730000 | 34.225719000 |
| 6 | -22.273164000 | -36.093923000 | 33.988541000 |
| 8 | -22.861735000 | -34.807205000 | 33.847659000 |
| 6 | -21.440649000 | -36.454776000 | 32.754400000 |
| 1 | -24.561544000 | -35.646834000 | 33.245826000 |
| 1 | -23.182012000 | -38.107653000 | 34.021210000 |
| 1 | -21.627129000 | -36.119507000 | 34.876439000 |
| 1 | -22.166805000 | -34.133538000 | 34.124928000 |
| 1 | -20.690135000 | -35.674132000 | 32.592245000 |
| 1 | -20.927048000 | -37.416324000 | 32.883058000 |
| 1 | -22.071718000 | -36.521855000 | 31.858859000 |
| 6 | -16.339048000 | -24.714534000 | 31.767747000 |
| 6 | -14.874696000 | -24.788266000 | 31.324156000 |
| 8 | -14.414205000 | -24.007303000 | 30.496768000 |
| 6 | -17.262585000 | -25.513793000 | 30.832355000 |

|   |               |               |              |                              |               |               |              |  |
|---|---------------|---------------|--------------|------------------------------|---------------|---------------|--------------|--|
| 6 | -17.062937000 | -27.030189000 | 30.947880000 | 1                            | -13.872519000 | -39.879627000 | 28.635795000 |  |
| 8 | -16.433958000 | -27.526600000 | 31.897377000 | 8                            | -19.397208000 | -41.321047000 | 30.512956000 |  |
| 7 | -17.601921000 | -27.782089000 | 29.972627000 | 1                            | -13.853086000 | -41.568292000 | 32.018365000 |  |
| 1 | -16.462604000 | -25.080497000 | 32.791581000 | 1                            | -14.037829000 | -42.543448000 | 29.469591000 |  |
| 1 | -18.310620000 | -25.290601000 | 31.075662000 | 1                            | -19.982220000 | -40.946747000 | 36.135527000 |  |
| 1 | -17.106571000 | -25.197165000 | 29.793557000 | 1                            | -17.302653000 | -40.651403000 | 35.862809000 |  |
| 1 | -18.100994000 | -27.350350000 | 29.208276000 | 1                            | -23.733565000 | -43.387136000 | 33.347449000 |  |
| 1 | -17.512909000 | -28.820178000 | 30.006080000 | 1                            | -23.763245000 | -44.829068000 | 31.050666000 |  |
| 7 | -14.149404000 | -25.788746000 | 31.914370000 | 1                            | -20.293913000 | -45.764543000 | 27.220220000 |  |
| 6 | -12.832283000 | -26.161449000 | 31.430918000 | 1                            | -17.741723000 | -44.980152000 | 26.719218000 |  |
| 6 | -12.754424000 | -27.316496000 | 30.409599000 | 6                            | -20.183574000 | -46.641065000 | 33.712184000 |  |
| 8 | -11.733574000 | -27.451074000 | 29.738689000 | 1                            | -19.761330000 | -47.569598000 | 33.311021000 |  |
| 1 | -14.695205000 | -26.470781000 | 32.430715000 | 1                            | -20.680742000 | -46.875791000 | 34.664201000 |  |
| 1 | -12.400677000 | -25.286983000 | 30.942205000 | 1                            | -20.942272000 | -46.284766000 | 33.009403000 |  |
| 7 | -13.819416000 | -28.155248000 | 30.343388000 | 1                            | -16.488399000 | -37.566427000 | 36.608500000 |  |
| 6 | -13.893304000 | -29.233622000 | 29.362902000 | 1                            | -23.786250000 | -36.998662000 | 35.267006000 |  |
| 6 | -14.367616000 | -28.723844000 | 27.983906000 | 1                            | -27.319311000 | -36.985361000 | 32.092701000 |  |
| 6 | -14.509154000 | -29.820162000 | 26.949769000 | 1                            | -28.170365000 | -41.194755000 | 33.449420000 |  |
| 6 | -15.554292000 | -30.754978000 | 27.035243000 | 1                            | -27.537558000 | -41.015020000 | 29.103833000 |  |
| 6 | -13.604179000 | -29.924668000 | 25.884949000 | 1                            | -12.109156000 | -44.555960000 | 20.750559000 |  |
| 6 | -15.692231000 | -31.755405000 | 26.070983000 | 1                            | -13.016062000 | -42.194988000 | 24.445726000 |  |
| 6 | -13.738906000 | -30.927256000 | 24.920755000 | 1                            | -17.345118000 | -41.304149000 | 21.181378000 |  |
| 6 | -14.786871000 | -31.845608000 | 25.009336000 | 1                            | -12.850309000 | -40.645668000 | 21.618485000 |  |
| 1 | -14.644016000 | -27.986992000 | 30.910275000 | 1                            | -12.136074000 | -38.430873000 | 29.735262000 |  |
| 1 | -14.591059000 | -29.984031000 | 29.745403000 | 1                            | -8.691635000  | -36.861408000 | 27.474166000 |  |
| 1 | -15.332353000 | -28.220102000 | 28.126676000 | 1                            | -12.028668000 | -34.501975000 | 30.016854000 |  |
| 1 | -13.653231000 | -27.968882000 | 27.637811000 | 1                            | -13.142499000 | -36.933426000 | 33.623284000 |  |
| 1 | -16.256599000 | -30.704160000 | 27.865135000 | 1                            | -18.239807000 | -33.533749000 | 37.573448000 |  |
| 1 | -12.788573000 | -29.208398000 | 25.809248000 | 1                            | -12.901619000 | -29.684843000 | 29.270981000 |  |
| 1 | -16.509707000 | -32.467851000 | 26.148541000 | 1                            | -16.626220000 | -23.659745000 | 31.735470000 |  |
| 1 | -13.028700000 | -30.987008000 | 24.099369000 | 1                            | -12.187430000 | -26.425570000 | 32.278012000 |  |
| 1 | -14.899248000 | -32.623693000 | 24.258513000 | 8                            | -24.058860000 | -40.747208000 | 34.036594000 |  |
| 6 | -18.931674000 | -33.868701000 | 36.786535000 | 1                            | -24.477015000 | -39.929064000 | 33.691023000 |  |
| 6 | -18.748937000 | -35.375835000 | 36.590609000 | 1                            | -23.564594000 | -41.079754000 | 33.271831000 |  |
| 8 | -19.658333000 | -36.187697000 | 36.759604000 |                              |               |               |              |  |
| 6 | -18.713158000 | -33.034726000 | 35.507392000 |                              |               |               |              |  |
| 6 | -19.810089000 | -33.295066000 | 34.445856000 |                              |               |               |              |  |
| 8 | -20.989962000 | -33.305280000 | 34.891153000 |                              |               |               |              |  |
| 8 | -19.453346000 | -33.463995000 | 33.244979000 |                              |               |               |              |  |
| 1 | -19.955918000 | -33.715288000 | 37.129345000 |                              |               |               |              |  |
| 1 | -18.759054000 | -31.971049000 | 35.781054000 |                              |               |               |              |  |
| 1 | -17.724999000 | -33.209607000 | 35.067986000 |                              |               |               |              |  |
| 7 | -17.483147000 | -35.753210000 | 36.244913000 |                              |               |               |              |  |
| 6 | -17.119988000 | -37.097895000 | 35.838664000 |                              |               |               |              |  |
| 6 | -16.337923000 | -37.058831000 | 34.517389000 |                              |               |               |              |  |
| 8 | -15.247408000 | -36.164955000 | 34.743593000 |                              |               |               |              |  |
| 6 | -17.198088000 | -36.646972000 | 33.321817000 |                              |               |               |              |  |
| 1 | -16.787640000 | -35.051916000 | 36.023499000 |                              |               |               |              |  |
| 1 | -18.037364000 | -37.684672000 | 35.746470000 |                              |               |               |              |  |
| 1 | -15.951710000 | -38.078065000 | 34.334778000 |                              |               |               |              |  |
| 1 | -14.934920000 | -35.802004000 | 33.885018000 |                              |               |               |              |  |
| 1 | -16.586223000 | -36.589252000 | 32.415279000 |                              |               |               |              |  |
| 1 | -17.988311000 | -37.386709000 | 33.147890000 |                              |               |               |              |  |
| 1 | -17.675274000 | -35.673407000 | 33.477394000 |                              |               |               |              |  |
| 6 | -13.009847000 | -34.357554000 | 30.475963000 |                              |               |               |              |  |
| 6 | -13.247764000 | -35.271904000 | 31.665653000 |                              |               |               |              |  |
| 8 | -14.229307000 | -35.091304000 | 32.401802000 |                              |               |               |              |  |
| 1 | -13.114499000 | -33.320002000 | 30.806187000 |                              |               |               |              |  |
| 1 | -13.789221000 | -34.542069000 | 29.727974000 |                              |               |               |              |  |
| 7 | -12.334866000 | -36.253908000 | 31.836562000 |                              |               |               |              |  |
| 6 | -12.403860000 | -37.259691000 | 32.888702000 |                              |               |               |              |  |
| 6 | -11.037169000 | -37.469226000 | 33.544040000 |                              |               |               |              |  |
| 1 | -11.610811000 | -36.372466000 | 31.123226000 |                              |               |               |              |  |
| 1 | -12.764337000 | -38.210523000 | 32.467669000 |                              |               |               |              |  |
| 1 | -11.095350000 | -38.258524000 | 34.302694000 |                              |               |               |              |  |
| 1 | -10.284865000 | -37.763362000 | 32.802506000 |                              |               |               |              |  |
| 1 | -10.694213000 | -36.548549000 | 34.028590000 |                              |               |               |              |  |
| 6 | -9.541203000  | -36.163785000 | 27.501609000 |                              |               |               |              |  |
| 6 | -10.538124000 | -36.763177000 | 28.498642000 |                              |               |               |              |  |
| 8 | -10.341238000 | -36.623274000 | 29.718015000 |                              |               |               |              |  |
| 6 | -10.013625000 | -35.893117000 | 26.062631000 |                              |               |               |              |  |
| 6 | -11.106042000 | -34.815049000 | 25.892140000 |                              |               |               |              |  |
| 6 | -10.624242000 | -33.426337000 | 26.340285000 |                              |               |               |              |  |
| 6 | -11.590772000 | -34.780899000 | 24.434183000 |                              |               |               |              |  |
| 1 | -9.158143000  | -35.252316000 | 27.970270000 |                              |               |               |              |  |
| 1 | -9.135346000  | -35.588779000 | 25.474050000 |                              |               |               |              |  |
| 1 | -10.357926000 | -36.830191000 | 25.603398000 |                              |               |               |              |  |
| 1 | -11.964343000 | -35.093107000 | 26.520280000 |                              |               |               |              |  |
| 1 | -11.411865000 | -32.677643000 | 26.199831000 |                              |               |               |              |  |
| 1 | -10.338473000 | -33.405707000 | 27.398038000 |                              |               |               |              |  |
| 1 | -9.751873000  | -33.108910000 | 25.751628000 |                              |               |               |              |  |
| 1 | -12.369130000 | -34.019371000 | 24.304049000 |                              |               |               |              |  |
| 1 | -10.763304000 | -34.527829000 | 23.755750000 |                              |               |               |              |  |
| 1 | -12.007256000 | -35.744615000 | 24.118164000 |                              |               |               |              |  |
| 7 | -11.550670000 | -37.484471000 | 27.983279000 |                              |               |               |              |  |
| 6 | -12.574323000 | -38.164791000 | 28.770428000 |                              |               |               |              |  |
| 6 | -13.072347000 | -39.417649000 | 28.045782000 |                              |               |               |              |  |
| 6 | -13.602794000 | -39.194374000 | 26.614925000 |                              |               |               |              |  |
| 6 | -13.510092000 | -38.015030000 | 26.124437000 |                              |               |               |              |  |
| 8 | -14.076843000 | -40.189314000 | 26.015243000 |                              |               |               |              |  |
| 1 | -11.794256000 | -37.419104000 | 26.999431000 |                              |               |               |              |  |
| 1 | -13.413906000 | -37.485834000 | 28.964673000 |                              |               |               |              |  |
| 1 | -12.275386000 | -40.169604000 | 27.978533000 |                              |               |               |              |  |
| 1 |               |               |              | 1                            | -13.872519000 | -39.879627000 | 28.635795000 |  |
| 1 |               |               |              | 8                            | -19.397208000 | -41.321047000 | 30.512956000 |  |
| 1 |               |               |              | 1                            | -13.853086000 | -41.568292000 | 32.018365000 |  |
| 1 |               |               |              | 1                            | -14.037829000 | -42.543448000 | 29.469591000 |  |
| 1 |               |               |              | 1                            | -19.982220000 | -40.946747000 | 36.135527000 |  |
| 1 |               |               |              | 1                            | -17.302653000 | -40.651403000 | 35.862809000 |  |
| 1 |               |               |              | 1                            | -23.733565000 | -43.387136000 | 33.347449000 |  |
| 1 |               |               |              | 1                            | -23.763245000 | -44.829068000 | 31.050666000 |  |
| 1 |               |               |              | 1                            | -20.293913000 | -45.764543000 | 27.220220000 |  |
| 1 |               |               |              | 1                            | -17.741723000 | -44.980152000 | 26.719218000 |  |
| 6 |               |               |              | 6                            | -20.183574000 | -46.641065000 | 33.712184000 |  |
| 1 |               |               |              | 1                            | -19.761330000 | -47.569598000 | 33.311021000 |  |
| 1 |               |               |              | 1                            | -20.680742000 | -46.875791000 | 34.664201000 |  |
| 1 |               |               |              | 1                            | -20.942272000 | -46.284766000 | 33.009403000 |  |
| 1 |               |               |              | 1                            | -16.488399000 | -37.566427000 | 36.608500000 |  |
| 1 |               |               |              | 1                            | -23.786250000 | -36.998662000 | 35.267006000 |  |
| 1 |               |               |              | 1                            | -27.319311000 | -36.985361000 | 32.092701000 |  |
| 1 |               |               |              | 1                            | -28.170365000 | -41.194755000 | 33.449420000 |  |
| 1 |               |               |              | 1                            | -27.537558000 | -41.015020000 | 29.103833000 |  |
| 1 |               |               |              | 1                            | -12.109156000 | -44.555960000 | 20.750559000 |  |
| 1 |               |               |              | 1                            | -13.016062000 | -42.194988000 | 24.445726000 |  |
| 1 |               |               |              | 1                            | -17.345118000 | -41.304149000 | 21.181378000 |  |
| 1 |               |               |              | 1                            | -12.850309000 | -40.645668000 | 21.618485000 |  |
| 1 |               |               |              | 1                            | -12.136074000 | -38.430873000 | 29.735262000 |  |
| 1 |               |               |              | 1                            | -8.691635000  | -36.861408000 | 27.474166000 |  |
| 1 |               |               |              | 1                            | -12.028668000 | -34.501975000 | 30.016854000 |  |
| 1 |               |               |              | 1                            | -13.142499000 | -36.933426000 | 33.623284000 |  |
| 1 |               |               |              | 1                            | -18.239807000 | -33.533749000 | 37.573448000 |  |
| 1 |               |               |              | 1                            | -12.901619000 | -29.684843000 | 29.270981000 |  |
| 1 |               |               |              | 1                            | -16.626220000 | -23.659745000 | 31.735470000 |  |
| 1 |               |               |              | 1                            | -12.187430000 | -26.425570000 | 32.278012000 |  |
| 8 |               |               |              | 8                            | -24.058860000 | -40.747208000 | 34.036594000 |  |
| 1 |               |               |              | 1                            | -24.477015000 | -39.929064000 | 33.691023000 |  |
| 1 |               |               |              | 1                            | -23.564594000 | -41.079754000 | 33.271831000 |  |
|   |               |               |              | <b><sup>4</sup>IM2Hy,III</b> |               |               |              |  |
| 6 | -21.200842000 | -44.932051000 | 29.765016000 | 6                            | -21.200842000 | -44.932051000 | 29.765016000 |  |
| 6 | -21.104163000 | -42.421386000 | 33.915064000 | 6                            | -21.104163000 | -42.421386000 | 33.915064000 |  |
| 6 | -16.344699000 | -41.707850000 | 33.347128000 | 6                            | -16.344699000 | -41.707850000 | 33.347128000 |  |
| 6 | -16.600518000 | -43.666098000 | 28.927033000 | 6                            | -16.600518000 | -43.666098000 | 28.927033000 |  |
| 6 | -21.575717000 | -44.356317000 | 30.973060000 | 6                            | -21.575717000 | -44.356317000 | 30.973060000 |  |
| 6 | -22.914117000 | -44.371402000 | 31.502840000 | 6                            | -22.914117000 | -44.371402000 | 31.502840000 |  |
| 6 | -22.894941000 | -43.635682000 | 32.652858000 | 6                            | -22.894941000 | -43.635682000 | 32.652858000 |  |
| 6 | -21.538635000 | -43.184895000 | 32.835868000 | 6                            | -21.538635000 | -43.184895000 | 3            |  |

|    |               |               |              |   |               |               |              |
|----|---------------|---------------|--------------|---|---------------|---------------|--------------|
| 1  | -19.206028000 | -30.978413000 | 32.719888000 | 8 | -25.263025000 | -38.704937000 | 32.585956000 |
| 1  | -19.470039000 | -29.764695000 | 31.440748000 | 6 | -26.193910000 | -35.250873000 | 31.385421000 |
| 1  | -20.330143000 | -39.894851000 | 31.798428000 | 6 | -24.958234000 | -34.725743000 | 30.618086000 |
| 1  | -18.562422000 | -39.793812000 | 31.471768000 | 6 | -24.862093000 | -35.309196000 | 29.200507000 |
| 1  | -20.424788000 | -41.394901000 | 30.089495000 | 6 | -24.994461000 | -33.190502000 | 30.572639000 |
| 6  | -19.085330000 | -45.799729000 | 34.094564000 | 1 | -26.224045000 | -37.305949000 | 30.657025000 |
| 16 | -18.064273000 | -45.524834000 | 32.584999000 | 1 | -27.093410000 | -34.947527000 | 30.829166000 |
| 1  | -19.505571000 | -44.843442000 | 34.419289000 | 1 | -26.264235000 | -34.733086000 | 32.352737000 |
| 1  | -18.403323000 | -46.136113000 | 34.885003000 | 1 | -24.050353000 | -35.006954000 | 31.166318000 |
| 6  | -16.996171000 | -40.667163000 | 22.00952000  | 1 | -23.997708000 | -34.893195000 | 28.670668000 |
| 6  | -15.486100000 | -40.840025000 | 21.901319000 | 1 | -24.742944000 | -36.398554000 | 29.205827000 |
| 8  | -14.984132000 | -41.970422000 | 21.804304000 | 1 | -25.760518000 | -35.070990000 | 28.613403000 |
| 6  | -17.587422000 | -41.161305000 | 23.351057000 | 1 | -24.116955000 | -32.794080000 | 30.049525000 |
| 6  | -19.117654000 | -41.306636000 | 23.217046000 | 1 | -25.891031000 | -32.830202000 | 30.048247000 |
| 6  | -17.181936000 | -40.234236000 | 24.504778000 | 1 | -24.996491000 | -32.765831000 | 31.583081000 |
| 6  | -19.816220000 | -41.899650000 | 24.446781000 | 7 | -24.522337000 | -36.671545000 | 33.303242000 |
| 1  | -17.281889000 | -39.619271000 | 21.846788000 | 6 | -23.438839000 | -37.071286000 | 34.200757000 |
| 1  | -17.169531000 | -42.160396000 | 23.541534000 | 6 | -22.264007000 | -36.092908000 | 33.974849000 |
| 1  | -19.552265000 | -40.320330000 | 22.993528000 | 8 | -22.856056000 | -34.811078000 | 33.806495000 |
| 1  | -19.333598000 | -41.940616000 | 22.344495000 | 6 | -21.404990000 | -36.466307000 | 32.763002000 |
| 1  | -17.569960000 | -40.593053000 | 25.462691000 | 1 | -24.536257000 | -35.662095000 | 33.186414000 |
| 1  | -16.095627000 | -40.155745000 | 24.616300000 | 1 | -23.164153000 | -38.110484000 | 34.008769000 |
| 1  | -17.584962000 | -39.223543000 | 24.349690000 | 1 | -21.635362000 | -36.103917000 | 34.875354000 |
| 1  | -20.882213000 | -42.062428000 | 24.247488000 | 1 | -22.168988000 | -34.130226000 | 34.086346000 |
| 1  | -19.379251000 | -42.866585000 | 24.727050000 | 1 | -20.659072000 | -35.681538000 | 32.599848000 |
| 1  | -19.741391000 | -41.240925000 | 25.317688000 | 1 | -20.883622000 | -37.419223000 | 32.921065000 |
| 7  | -14.759812000 | -39.698750000 | 21.862654000 | 1 | -22.016265000 | -36.558029000 | 31.856143000 |
| 6  | -13.305176000 | -39.641928000 | 21.825801000 | 6 | -16.305250000 | -24.645031000 | 31.827639000 |
| 6  | -12.753119000 | -39.084959000 | 23.138812000 | 6 | -14.837689000 | -24.717148000 | 31.394389000 |
| 8  | -13.406779000 | -37.860205000 | 23.425793000 | 8 | -14.371181000 | -23.932919000 | 30.573480000 |
| 1  | -15.194071000 | -38.837557000 | 22.172148000 | 6 | -17.222044000 | -25.441932000 | 30.883635000 |
| 1  | -13.006904000 | -38.992169000 | 20.992094000 | 6 | -17.023614000 | -26.958703000 | 30.996577000 |
| 1  | -12.930045000 | -39.807183000 | 23.943049000 | 8 | -16.401235000 | -27.457927000 | 31.948961000 |
| 1  | -11.663696000 | -38.944104000 | 23.030954000 | 7 | -17.556227000 | -27.707728000 | 30.015661000 |
| 1  | -13.589258000 | -37.870044000 | 24.401644000 | 1 | -16.436000000 | -25.013683000 | 32.849627000 |
| 6  | -12.620051000 | -43.076888000 | 24.877876000 | 1 | -18.271791000 | -25.219187000 | 31.119879000 |
| 6  | -12.306932000 | -44.128262000 | 23.819590000 | 1 | -17.058518000 | -25.122703000 | 29.846781000 |
| 8  | -11.591811000 | -45.099207000 | 24.068438000 | 1 | -18.049311000 | -27.273639000 | 29.248761000 |
| 6  | -13.568171000 | -43.633671000 | 25.955449000 | 1 | -17.467055000 | -28.745899000 | 30.040812000 |
| 8  | -13.736437000 | -42.748882000 | 27.047995000 | 7 | -14.116795000 | -25.719950000 | 31.985979000 |
| 1  | -11.678366000 | -42.797620000 | 25.362900000 | 6 | -12.796177000 | -26.090882000 | 31.510799000 |
| 1  | -14.534954000 | -43.884323000 | 25.486279000 | 6 | -12.711013000 | -27.242986000 | 30.486749000 |
| 1  | -13.147849000 | -44.562230000 | 26.354889000 | 8 | -11.685318000 | -27.375888000 | 29.822911000 |
| 1  | -13.963339000 | -41.850797000 | 26.700289000 | 1 | -14.666469000 | -26.403846000 | 32.495823000 |
| 7  | -12.888219000 | -43.922967000 | 22.600357000 | 1 | -12.361383000 | -25.214915000 | 31.027636000 |
| 6  | -12.771103000 | -44.886306000 | 21.522320000 | 7 | -13.775728000 | -28.081179000 | 30.410191000 |
| 6  | -14.135091000 | -45.264201000 | 20.904749000 | 6 | -13.842658000 | -29.156593000 | 29.425929000 |
| 6  | -15.076189000 | -45.966586000 | 21.860087000 | 6 | -14.304606000 | -28.642182000 | 28.044440000 |
| 6  | -14.983872000 | -47.348448000 | 22.076856000 | 6 | -14.437396000 | -29.735279000 | 27.005737000 |
| 6  | -16.050638000 | -45.244151000 | 22.563066000 | 6 | -15.484993000 | -30.668401000 | 27.078068000 |
| 6  | -15.837897000 | -47.994310000 | 22.971773000 | 6 | -13.521614000 | -29.838741000 | 25.950100000 |
| 6  | -16.909190000 | -45.888042000 | 23.457250000 | 6 | -15.614932000 | -31.666233000 | 26.110043000 |
| 6  | -16.806115000 | -47.265015000 | 23.665747000 | 6 | -13.648291000 | -30.838624000 | 24.982051000 |
| 1  | -13.513101000 | -43.131544000 | 22.459361000 | 6 | -14.698829000 | -31.755259000 | 25.057527000 |
| 1  | -12.270183000 | -45.763230000 | 21.941007000 | 1 | -14.604209000 | -27.914520000 | 30.971818000 |
| 1  | -14.609920000 | -44.351703000 | 20.526025000 | 1 | -14.544494000 | -29.907273000 | 29.800364000 |
| 1  | -13.935682000 | -45.907948000 | 20.036648000 | 1 | -15.270388000 | -28.138525000 | 28.180314000 |
| 1  | -14.232068000 | -47.924060000 | 21.539513000 | 1 | -13.586884000 | -27.886483000 | 27.707022000 |
| 1  | -16.124237000 | -44.171478000 | 22.403548000 | 1 | -16.195568000 | -30.618254000 | 27.900928000 |
| 1  | -15.748148000 | -49.066917000 | 23.127293000 | 1 | -12.703906000 | -29.123841000 | 25.884711000 |
| 1  | -17.663507000 | -45.311701000 | 23.988379000 | 1 | -16.433955000 | -32.377860000 | 26.177706000 |
| 1  | -17.472901000 | -47.765476000 | 24.363421000 | 1 | -12.929838000 | -30.897547000 | 24.167787000 |
| 6  | -27.266586000 | -41.768066000 | 33.093655000 | 1 | -14.805161000 | -32.530994000 | 24.303382000 |
| 6  | -27.359136000 | -41.722201000 | 31.571593000 | 6 | -18.960226000 | -33.844517000 | 36.770619000 |
| 8  | -27.964486000 | -42.595564000 | 30.925631000 | 6 | -18.762032000 | -35.348616000 | 36.566836000 |
| 6  | -27.328753000 | -43.207673000 | 33.635757000 | 8 | -19.662985000 | -36.170878000 | 36.731607000 |
| 8  | -28.547673000 | -43.841561000 | 33.276926000 | 6 | -18.738541000 | -32.999589000 | 35.499271000 |
| 6  | -27.207445000 | -43.237061000 | 35.154724000 | 6 | -19.823247000 | -33.263455000 | 34.425909000 |
| 1  | -26.345689000 | -41.282641000 | 33.433269000 | 8 | -21.006547000 | -33.292082000 | 34.861702000 |
| 1  | -26.474253000 | -43.764065000 | 33.207315000 | 8 | -19.454793000 | -33.417201000 | 33.226827000 |
| 1  | -28.620850000 | -43.674865000 | 32.312996000 | 1 | -19.988720000 | -33.702974000 | 37.105665000 |
| 1  | -27.257864000 | -44.270379000 | 35.515021000 | 1 | -18.797747000 | -31.938390000 | 35.779903000 |
| 1  | -26.259377000 | -42.792534000 | 35.476890000 | 1 | -17.744682000 | -33.160952000 | 35.067462000 |
| 1  | -28.032751000 | -42.677571000 | 35.611617000 | 7 | -17.492790000 | -35.711502000 | 36.218886000 |
| 7  | -26.754663000 | -40.665967000 | 30.978066000 | 6 | -17.116572000 | -37.050426000 | 35.805949000 |
| 6  | -26.755212000 | -40.493462000 | 29.532717000 | 6 | -16.326408000 | -36.995700000 | 34.490063000 |
| 6  | -25.460928000 | -40.973248000 | 28.839880000 | 8 | -15.245255000 | -36.094606000 | 34.730208000 |
| 6  | -24.252042000 | -40.101259000 | 29.233744000 | 6 | -17.182255000 | -36.582683000 | 33.291692000 |
| 6  | -25.679527000 | -41.013260000 | 27.319794000 | 1 | -16.803427000 | -35.002413000 | 36.003259000 |
| 6  | -22.888154000 | -40.662108000 | 28.812078000 | 1 | -18.029066000 | -37.643153000 | 35.703344000 |
| 1  | -26.268005000 | -39.977291000 | 31.556981000 | 1 | -15.930398000 | -38.010603000 | 34.303022000 |
| 1  | -26.920365000 | -39.430093000 | 29.307693000 | 1 | -14.923216000 | -35.731051000 | 33.875221000 |
| 1  | -25.278223000 | -41.999173000 | 29.191711000 | 1 | -16.564674000 | -36.512277000 | 32.389954000 |
| 1  | -24.382520000 | -39.099291000 | 28.795470000 | 1 | -17.964338000 | -37.328133000 | 33.106016000 |
| 1  | -24.251139000 | -39.956197000 | 30.321115000 | 1 | -17.669204000 | -35.614704000 | 33.451648000 |
| 1  | -24.797171000 | -41.390098000 | 26.792270000 | 6 | -12.985589000 | -34.338800000 | 30.454477000 |
| 1  | -26.524462000 | -41.662508000 | 27.059645000 | 6 | -13.227978000 | -35.233495000 | 31.658116000 |
| 1  | -25.894840000 | -40.009654000 | 26.927582000 | 8 | -14.203835000 | -35.031314000 | 32.396124000 |
| 1  | -22.080286000 | -39.991115000 | 29.125780000 | 1 | -13.074844000 | -33.295519000 | 30.770930000 |
| 1  | -22.720468000 | -41.650805000 | 29.262401000 | 1 | -13.771897000 | -34.523480000 | 29.713767000 |
| 1  | -22.805910000 | -40.779929000 | 27.725625000 | 7 | -12.325048000 | -36.223188000 | 31.838377000 |
| 6  | -26.289192000 | -36.769890000 | 31.610241000 | 6 | -12.396630000 | -37.211033000 | 32.906987000 |
| 6  | -25.289499000 | -37.451437000 | 32.546050000 | 6 | -11.031873000 | -37.409990000 | 33.569846000 |

|    |               |               |              |    |               |               |              |
|----|---------------|---------------|--------------|----|---------------|---------------|--------------|
| 1  | -11.606168000 | -36.359597000 | 31.123057000 | 1  | -16.162598000 | -44.249847000 | 32.622190000 |
| 1  | -12.755631000 | -38.168790000 | 32.500593000 | 1  | -16.374732000 | -43.817249000 | 26.292364000 |
| 1  | -11.092245000 | -38.186820000 | 34.341126000 | 1  | -22.411335000 | -46.071722000 | 26.438104000 |
| 1  | -10.277442000 | -37.716155000 | 32.835374000 | 6  | -15.934872000 | -36.178535000 | 29.071287000 |
| 1  | -10.690422000 | -36.481509000 | 34.040312000 | 6  | -17.838665000 | -37.312738000 | 28.692908000 |
| 6  | -9.554159000  | -36.209994000 | 27.490298000 | 6  | -19.143630000 | -37.824215000 | 28.569720000 |
| 6  | -10.555744000 | -36.787616000 | 28.495640000 | 6  | -16.922370000 | -39.328139000 | 27.601681000 |
| 8  | -10.351082000 | -36.644356000 | 29.713281000 | 6  | -16.740371000 | -38.079629000 | 28.203775000 |
| 6  | -10.033368000 | -35.930677000 | 26.055138000 | 6  | -17.299822000 | -36.093542000 | 29.239956000 |
| 6  | -11.108543000 | -34.833951000 | 25.894728000 | 6  | -19.321691000 | -39.066732000 | 27.973077000 |
| 6  | -10.598572000 | -33.453228000 | 26.336140000 | 6  | -18.222449000 | -39.817506000 | 27.495084000 |
| 6  | -11.608607000 | -34.793170000 | 24.442127000 | 7  | -15.589336000 | -37.359792000 | 28.450082000 |
| 1  | -9.148950000  | -35.306118000 | 27.954935000 | 1  | -14.641349000 | -37.650678000 | 28.208399000 |
| 1  | -9.154874000  | -35.641539000 | 25.459290000 | 6  | -18.088320000 | -34.965046000 | 29.845485000 |
| 1  | -10.397969000 | -36.861348000 | 25.598484000 | 6  | -17.219260000 | -33.879661000 | 30.501140000 |
| 1  | -11.964371000 | -35.096689000 | 26.532800000 | 7  | -18.006677000 | -32.788881000 | 31.058643000 |
| 1  | -11.375192000 | -32.691580000 | 26.204229000 | 8  | -18.524004000 | -31.822181000 | 30.289275000 |
| 1  | -10.300445000 | -33.436742000 | 27.390570000 | 6  | -18.353511000 | -31.788737000 | 29.045865000 |
| 1  | -9.727822000  | -33.150527000 | 25.737391000 | 6  | -19.361558000 | -30.777091000 | 30.996408000 |
| 1  | -12.375755000 | -34.019066000 | 24.319511000 | 1  | -18.147303000 | -32.786107000 | 32.083572000 |
| 1  | -10.784573000 | -34.554276000 | 23.754475000 | 8  | -20.607701000 | -39.570540000 | 27.889801000 |
| 1  | -12.043952000 | -35.750338000 | 24.131651000 | 6  | -19.675729000 | -41.893906000 | 30.039521000 |
| 7  | -11.582507000 | -37.494306000 | 27.988247000 | 1  | -15.163457000 | -35.474641000 | 29.351650000 |
| 6  | -12.614898000 | -38.154874000 | 28.780872000 | 1  | -20.009793000 | -37.272911000 | 28.923679000 |
| 6  | -13.124595000 | -39.409849000 | 28.067799000 | 1  | -16.082538000 | -39.896403000 | 27.212626000 |
| 6  | -13.643142000 | -39.195992000 | 26.631112000 | 1  | -18.400458000 | -40.782830000 | 27.026724000 |
| 8  | -13.546525000 | -38.019796000 | 26.134195000 | 1  | -18.783836000 | -35.356346000 | 30.599519000 |
| 8  | -14.110174000 | -40.195836000 | 26.034388000 | 1  | -18.705644000 | -34.481181000 | 29.076583000 |
| 1  | -11.825992000 | -37.432812000 | 27.004154000 | 1  | -16.637829000 | -34.306120000 | 31.323899000 |
| 1  | -13.447537000 | -37.464725000 | 28.965118000 | 1  | -16.523235000 | -33.465909000 | 29.763300000 |
| 1  | -12.336890000 | -40.172515000 | 28.013915000 | 1  | -19.221699000 | -29.814865000 | 30.496154000 |
| 1  | -13.935284000 | -39.854811000 | 28.656723000 | 1  | -19.107513000 | -30.676812000 | 32.054200000 |
| 8  | -19.524029000 | -41.173335000 | 30.377664000 | 1  | -20.421420000 | -31.051730000 | 30.911494000 |
| 1  | -13.857348000 | -41.562083000 | 31.965070000 | 1  | -20.052621000 | -40.892409000 | 29.795434000 |
| 1  | -14.041528000 | -42.604976000 | 29.442662000 | 1  | -19.017007000 | -42.028636000 | 30.907871000 |
| 1  | -19.984755000 | -40.923596000 | 36.066123000 | 1  | -20.778713000 | -42.523332000 | 27.619980000 |
| 1  | -17.310044000 | -40.589144000 | 35.787660000 | 6  | -19.604767000 | -48.061847000 | 30.768947000 |
| 1  | -23.713617000 | -43.404682000 | 33.322656000 | 16 | -18.670876000 | -47.095814000 | 29.509589000 |
| 1  | -23.756368000 | -44.869436000 | 31.038926000 | 1  | -20.047249000 | -47.371788000 | 31.489915000 |
| 1  | -20.282620000 | -45.865636000 | 27.232284000 | 1  | -18.853959000 | -48.652750000 | 31.307839000 |
| 1  | -17.721411000 | -45.102809000 | 26.741695000 | 6  | -14.569573000 | -37.831589000 | 22.011654000 |
| 6  | -20.201443000 | -46.826742000 | 33.892738000 | 6  | -13.157256000 | -38.281400000 | 22.361069000 |
| 1  | -19.792875000 | -47.790801000 | 33.569038000 | 8  | -12.700750000 | -39.348789000 | 21.923498000 |
| 1  | -20.756509000 | -46.985441000 | 34.828935000 | 6  | -15.673564000 | -38.683108000 | 22.681347000 |
| 1  | -20.908823000 | -46.488911000 | 33.128772000 | 6  | -17.040730000 | -38.331670000 | 22.058220000 |
| 1  | -16.486522000 | -37.519799000 | 36.576611000 | 6  | -15.660747000 | -38.506533000 | 24.206164000 |
| 1  | -23.794568000 | -36.994770000 | 35.235717000 | 6  | -18.196303000 | -39.237368000 | 22.500767000 |
| 1  | -27.282340000 | -37.014686000 | 32.011819000 | 1  | -14.715754000 | -36.774561000 | 22.270242000 |
| 1  | -28.117196000 | -41.205734000 | 33.505463000 | 1  | -15.457305000 | -39.736357000 | 22.449352000 |
| 1  | -27.608958000 | -41.056546000 | 29.146329000 | 1  | -17.285287000 | -37.286231000 | 22.298332000 |
| 1  | -12.128414000 | -44.487370000 | 20.722006000 | 1  | -16.951986000 | -38.381738000 | 20.963158000 |
| 1  | -13.060182000 | -42.174377000 | 24.440757000 | 1  | -16.452392000 | -39.089139000 | 24.685606000 |
| 1  | -17.423442000 | -41.253378000 | 21.186083000 | 1  | -14.717144000 | -38.831489000 | 24.656466000 |
| 1  | -12.928161000 | -40.648437000 | 21.631289000 | 1  | -15.824057000 | -37.454452000 | 24.478029000 |
| 1  | -12.181326000 | -38.414770000 | 29.749475000 | 1  | -19.119876000 | -38.977643000 | 21.969253000 |
| 1  | -8.719402000  | -36.924970000 | 27.456162000 | 1  | -17.975170000 | -40.291340000 | 22.287000000 |
| 1  | -12.009030000 | -34.502193000 | 29.991851000 | 1  | -18.398373000 | -39.150710000 | 23.573226000 |
| 1  | -13.137356000 | -36.872641000 | 33.633875000 | 7  | -12.441177000 | -37.427295000 | 23.129209000 |
| 1  | -18.278412000 | -33.508890000 | 37.566012000 | 6  | -11.108459000 | -37.706139000 | 23.644841000 |
| 1  | -12.850785000 | -29.608811000 | 29.341051000 | 6  | -11.151751000 | -38.065763000 | 25.129057000 |
| 1  | -16.592354000 | -23.590210000 | 31.796095000 | 8  | -11.839082000 | -37.042404000 | 25.827581000 |
| 1  | -12.157233000 | -26.357349000 | 32.361639000 | 1  | -12.941563000 | -36.700536000 | 23.625308000 |
| 8  | -23.992758000 | -40.753814000 | 33.990672000 | 1  | -10.492023000 | -36.810164000 | 23.497951000 |
| 1  | -24.430256000 | -39.941448000 | 33.654684000 | 1  | -11.665889000 | -39.025351000 | 25.258853000 |
| 1  | -23.496838000 | -41.068673000 | 33.219604000 | 1  | -10.115966000 | -38.178870000 | 25.494191000 |
|    |               |               |              | 1  | -12.356637000 | -37.498272000 | 26.539837000 |
|    |               |               |              | 6  | -12.152177000 | -42.451972000 | 24.417081000 |
| 6  | -21.684982000 | -45.764485000 | 27.184739000 | 6  | -11.488752000 | -42.936229000 | 23.132096000 |
| 6  | -21.751560000 | -45.148853000 | 31.974672000 | 8  | -11.102313000 | -44.098821000 | 23.008590000 |
| 6  | -16.935984000 | -44.366729000 | 31.868941000 | 6  | -13.521676000 | -43.117423000 | 24.631553000 |
| 6  | -17.095240000 | -44.105468000 | 27.053836000 | 8  | -14.059157000 | -42.862303000 | 25.919615000 |
| 6  | -22.093655000 | -45.774329000 | 28.505089000 | 1  | -11.502041000 | -42.737617000 | 25.251846000 |
| 6  | -23.437938000 | -46.080863000 | 28.947616000 | 1  | -14.213158000 | -42.783914000 | 23.839570000 |
| 6  | -23.472164000 | -45.856845000 | 30.288838000 | 1  | -13.410669000 | -44.202205000 | 24.536097000 |
| 6  | -22.143672000 | -45.441619000 | 30.678556000 | 1  | -13.937147000 | -41.903407000 | 26.130414000 |
| 6  | -20.440621000 | -44.843147000 | 32.391134000 | 7  | -11.362255000 | -41.997850000 | 22.148507000 |
| 6  | -20.030948000 | -44.654501000 | 33.734178000 | 6  | -10.793901000 | -42.314149000 | 20.851812000 |
| 6  | -18.658027000 | -44.465538000 | 33.706140000 | 1  | -11.682572000 | -41.857525000 | 19.647277000 |
| 6  | -18.269592000 | -44.534253000 | 32.343530000 | 6  | -13.011033000 | -42.576929000 | 19.583886000 |
| 6  | -16.555413000 | -44.281730000 | 30.548269000 | 6  | -13.126783000 | -43.789036000 | 18.889685000 |
| 6  | -15.205169000 | -44.018315000 | 30.089410000 | 6  | -14.151831000 | -42.053480000 | 20.209327000 |
| 6  | -15.256319000 | -43.909209000 | 28.737041000 | 6  | -14.346024000 | -44.464775000 | 18.820886000 |
| 6  | -16.638561000 | -44.126416000 | 28.359191000 | 6  | -15.373066000 | -42.727505000 | 20.142682000 |
| 6  | -18.400028000 | -44.471859000 | 26.642816000 | 6  | -15.475371000 | -43.934929000 | 19.448651000 |
| 6  | -18.843802000 | -44.536136000 | 25.298241000 | 1  | -11.753411000 | -41.067506000 | 22.279256000 |
| 6  | -20.128675000 | -45.068904000 | 25.333015000 | 1  | -10.641450000 | -43.396464000 | 20.834482000 |
| 6  | -20.434965000 | -45.294046000 | 26.700486000 | 1  | -11.852417000 | -40.778304000 | 19.765340000 |
| 7  | -21.315719000 | -45.404785000 | 29.580115000 | 1  | -11.110284000 | -42.017019000 | 18.750061000 |
| 7  | -19.353669000 | -44.757890000 | 31.535704000 | 1  | -12.250612000 | -44.207689000 | 18.397348000 |
| 7  | -17.415708000 | -44.360536000 | 29.470147000 | 1  | -14.069007000 | -41.113101000 | 20.748190000 |
| 7  | -19.385889000 | -44.915155000 | 27.499960000 | 1  | -14.414314000 | -45.403971000 | 18.276644000 |
| 26 | -19.342333000 | -44.958792000 | 29.527827000 | 1  | -16.247284000 | -42.306358000 | 20.633851000 |
| 1  | -22.512832000 | -45.197397000 | 32.748288000 | 1  | -16.426796000 | -44.458699000 | 19.396999000 |

4P<sub>Hy,AIII</sub>



|   |               |               |              |   |               |               |              |
|---|---------------|---------------|--------------|---|---------------|---------------|--------------|
| 6 | -24.476130000 | -43.427689000 | 25.709527000 | 1 | -13.004592000 | -34.651744000 | 25.800268000 |
| 6 | -24.836506000 | -41.984524000 | 26.053257000 | 6 | -17.689586000 | -33.978518000 | 36.961464000 |
| 8 | -26.005147000 | -41.573242000 | 25.949757000 | 6 | -18.837826000 | -34.988357000 | 36.836522000 |
| 6 | -25.258899000 | -43.933154000 | 24.480446000 | 8 | -19.302842000 | -35.520603000 | 37.846589000 |
| 8 | -26.653318000 | -43.910863000 | 24.728932000 | 6 | -16.750900000 | -33.773575000 | 35.749100000 |
| 6 | -24.878581000 | -45.362639000 | 24.108834000 | 6 | -17.312189000 | -32.798927000 | 34.696541000 |
| 1 | -23.395401000 | -43.532074000 | 25.558304000 | 8 | -16.939681000 | -31.601422000 | 34.789005000 |
| 1 | -25.011270000 | -43.273611000 | 23.627710000 | 8 | -18.131223000 | -33.271223000 | 33.838738000 |
| 1 | -26.813587000 | -43.031270000 | 25.136977000 | 1 | -18.123449000 | -33.013273000 | 37.260586000 |
| 1 | -25.482068000 | -45.698439000 | 23.258815000 | 1 | -15.815159000 | -33.341929000 | 36.118757000 |
| 1 | -23.819505000 | -45.435182000 | 23.834096000 | 1 | -16.532188000 | -34.746451000 | 35.296689000 |
| 1 | -25.074526000 | -46.040080000 | 24.948891000 | 7 | -19.294794000 | -35.223292000 | 35.576089000 |
| 7 | -23.823055000 | -41.205941000 | 26.484332000 | 6 | -20.380474000 | -36.146709000 | 35.310793000 |
| 6 | -24.021464000 | -39.817814000 | 26.894591000 | 6 | -19.999806000 | -37.286797000 | 34.343930000 |
| 6 | -24.044642000 | -38.807293000 | 25.727210000 | 8 | -19.055545000 | -38.180119000 | 34.911854000 |
| 6 | -22.713863000 | -38.818741000 | 24.950280000 | 6 | -19.542541000 | -36.767802000 | 32.975607000 |
| 6 | -24.392150000 | -37.416798000 | 26.280130000 | 1 | -18.930280000 | -34.638165000 | 34.814185000 |
| 6 | -22.703939000 | -37.951859000 | 23.685650000 | 1 | -21.244816000 | -35.605246000 | 34.893207000 |
| 1 | -22.884114000 | -41.597549000 | 26.536354000 | 1 | -20.910778000 | -37.887523000 | 34.203518000 |
| 1 | -23.211389000 | -39.563307000 | 27.586441000 | 1 | -18.195102000 | -37.719436000 | 35.008967000 |
| 1 | -24.849441000 | -39.122157000 | 25.047599000 | 1 | -19.323770000 | -37.604848000 | 32.303590000 |
| 1 | -21.904744000 | -38.505294000 | 25.624395000 | 1 | -20.316519000 | -36.143621000 | 32.510524000 |
| 1 | -22.489105000 | -39.854775000 | 24.663480000 | 1 | -18.635376000 | -36.161501000 | 33.073006000 |
| 1 | -24.501683000 | -36.67773000  | 25.479484000 | 6 | -14.034828000 | -36.791023000 | 34.647010000 |
| 1 | -25.336279000 | -37.439556000 | 26.838171000 | 6 | -15.291403000 | -37.633280000 | 34.487591000 |
| 1 | -23.609037000 | -37.057600000 | 26.960534000 | 8 | -16.366987000 | -37.250013000 | 34.963972000 |
| 1 | -21.757384000 | -38.065232000 | 23.144059000 | 1 | -13.940543000 | -36.503134000 | 35.698225000 |
| 1 | -23.515316000 | -38.237339000 | 23.003193000 | 1 | -14.153957000 | -35.867351000 | 34.069367000 |
| 1 | -22.821647000 | -36.887038000 | 23.915586000 | 7 | -15.132189000 | -38.787549000 | 33.796966000 |
| 6 | -21.281015000 | -26.614752000 | 31.578364000 | 6 | -16.216499000 | -39.725766000 | 33.538950000 |
| 6 | -21.057413000 | -26.723013000 | 33.086778000 | 6 | -16.123738000 | -40.986650000 | 34.405474000 |
| 8 | -21.729551000 | -26.064440000 | 33.887422000 | 1 | -14.205177000 | -39.007865000 | 33.432575000 |
| 6 | -22.563508000 | -27.335238000 | 31.105449000 | 1 | -16.190268000 | -39.997170000 | 32.475215000 |
| 6 | -23.894877000 | -26.875754000 | 31.733893000 | 1 | -16.940513000 | -41.677058000 | 34.160506000 |
| 6 | -24.146787000 | -25.372696000 | 31.547089000 | 1 | -15.171145000 | -41.508904000 | 34.250171000 |
| 6 | -25.053364000 | -27.706326000 | 31.160545000 | 1 | -16.203037000 | -40.726814000 | 35.466270000 |
| 1 | -21.343330000 | -25.546906000 | 31.340616000 | 6 | -10.717622000 | -37.698393000 | 31.746737000 |
| 1 | -22.629417000 | -27.215649000 | 30.012687000 | 6 | -11.910761000 | -38.655847000 | 31.677872000 |
| 1 | -22.442270000 | -28.412388000 | 31.285975000 | 8 | -12.381451000 | -39.127194000 | 32.726593000 |
| 1 | -23.836926000 | -27.062136000 | 32.813011000 | 6 | -10.390081000 | -36.830670000 | 30.520090000 |
| 1 | -25.141287000 | -25.096060000 | 31.920111000 | 6 | -11.410362000 | -35.725951000 | 30.164504000 |
| 1 | -23.409104000 | -24.787378000 | 32.102982000 | 6 | -11.520426000 | -34.663002000 | 31.268722000 |
| 1 | -24.099535000 | -25.086595000 | 30.486307000 | 6 | -11.038578000 | -35.079679000 | 28.821004000 |
| 1 | -26.005765000 | -27.439515000 | 31.635612000 | 1 | -10.877049000 | -37.079108000 | 32.635008000 |
| 1 | -25.164229000 | -27.539133000 | 30.079866000 | 1 | -9.416831000  | -36.350662000 | 30.700571000 |
| 1 | -24.891842000 | -28.780502000 | 31.314267000 | 1 | -10.235722000 | -37.474785000 | 29.643164000 |
| 7 | -20.104998000 | -27.607280000 | 33.468701000 | 1 | -12.398562000 | -36.194426000 | 30.048192000 |
| 6 | -19.755600000 | -27.891951000 | 34.852666000 | 1 | -12.238326000 | -33.884249000 | 30.987382000 |
| 6 | -19.281231000 | -29.349851000 | 34.970488000 | 1 | -11.853638000 | -35.083771000 | 32.224090000 |
| 8 | -18.330269000 | -29.533479000 | 33.938642000 | 1 | -10.550906000 | -34.173974000 | 31.436565000 |
| 6 | -20.434665000 | -30.357682000 | 34.873883000 | 1 | -11.750699000 | -34.291169000 | 28.551460000 |
| 1 | -19.532997000 | -28.088595000 | 32.785415000 | 1 | -10.041268000 | -34.620467000 | 28.874948000 |
| 1 | -20.631254000 | -27.691285000 | 35.475960000 | 1 | -11.034330000 | -35.810072000 | 28.003905000 |
| 1 | -18.799206000 | -29.462806000 | 35.955451000 | 7 | -12.347239000 | -39.006345000 | 30.453152000 |
| 1 | -17.795548000 | -30.358975000 | 34.150958000 | 6 | -13.462396000 | -39.916315000 | 30.221411000 |
| 1 | -20.036764000 | -31.376131000 | 34.824380000 | 6 | -13.318325000 | -40.630010000 | 28.872704000 |
| 1 | -21.103538000 | -30.281774000 | 35.741634000 | 6 | -13.268728000 | -39.712461000 | 27.634425000 |
| 1 | -21.025776000 | -30.179053000 | 33.968039000 | 8 | -12.950079000 | -38.488218000 | 27.834981000 |
| 6 | -20.426599000 | -26.262869000 | 26.986721000 | 8 | -13.523946000 | -40.214387000 | 26.514594000 |
| 6 | -19.040779000 | -25.863490000 | 26.472902000 | 1 | -12.085356000 | -38.484418000 | 29.621287000 |
| 8 | -18.837999000 | -25.634909000 | 25.284053000 | 1 | -14.413040000 | -39.366508000 | 30.255703000 |
| 6 | -20.684444000 | -27.771031000 | 26.833649000 | 1 | -12.396655000 | -41.229280000 | 28.867095000 |
| 6 | -19.820593000 | -28.625284000 | 27.768993000 | 1 | -14.144866000 | -41.335957000 | 28.749199000 |
| 8 | -19.211811000 | -28.114562000 | 28.727298000 | 8 | -19.997208000 | -42.850508000 | 29.344856000 |
| 7 | -19.761242000 | -29.937719000 | 27.495569000 | 1 | -14.347137000 | -43.916051000 | 30.742015000 |
| 1 | -20.559354000 | -25.977748000 | 28.034650000 | 1 | -14.469169000 | -43.708276000 | 28.019959000 |
| 1 | -21.738433000 | -27.985162000 | 27.058273000 | 1 | -20.687641000 | -44.663474000 | 34.594801000 |
| 1 | -20.515443000 | -28.074537000 | 25.793061000 | 1 | -17.988901000 | -44.284784000 | 34.537284000 |
| 1 | -20.268198000 | -30.316348000 | 26.708304000 | 1 | -24.309879000 | -45.958350000 | 30.967428000 |
| 1 | -19.228438000 | -30.593745000 | 28.105358000 | 1 | -24.242995000 | -46.398520000 | 28.296887000 |
| 7 | -18.071274000 | -25.790913000 | 27.437228000 | 1 | -20.786199000 | -45.286276000 | 24.500486000 |
| 6 | -16.668212000 | -25.638820000 | 27.101249000 | 1 | -18.253246000 | -44.260272000 | 24.434030000 |
| 6 | -15.803934000 | -26.915410000 | 27.050141000 | 6 | -20.668141000 | -48.983978000 | 30.169340000 |
| 8 | -14.678079000 | -26.847572000 | 26.560480000 | 1 | -20.226890000 | -49.671960000 | 29.439530000 |
| 1 | -18.321125000 | -26.179562000 | 28.339531000 | 1 | -21.141685000 | -49.584021000 | 30.959268000 |
| 1 | -16.618258000 | -25.189055000 | 26.108224000 | 1 | -21.448986000 | -48.410154000 | 29.661849000 |
| 7 | -16.329902000 | -28.045300000 | 27.585143000 | 1 | -20.675070000 | -36.572544000 | 36.272701000 |
| 6 | -15.622795000 | -29.320538000 | 27.523820000 | 1 | -18.946238000 | -27.222423000 | 35.177145000 |
| 6 | -15.813495000 | -30.025982000 | 26.162813000 | 1 | -20.432670000 | -27.025209000 | 31.017590000 |
| 6 | -15.037584000 | -31.321126000 | 26.055231000 | 1 | -24.748208000 | -44.055303000 | 26.569722000 |
| 6 | -15.550926000 | -32.516454000 | 26.581576000 | 1 | -24.971295000 | -39.763345000 | 27.436127000 |
| 6 | -13.776733000 | -31.348834000 | 25.442450000 | 1 | -9.807336000  | -41.836836000 | 20.744758000 |
| 6 | -14.826760000 | -33.707075000 | 26.483012000 | 1 | -12.267801000 | -41.363393000 | 24.961830000 |
| 6 | -13.047985000 | -32.536647000 | 25.351037000 | 1 | -14.655934000 | -37.916476000 | 20.432191000 |
| 6 | -13.570597000 | -33.724938000 | 25.868008000 | 1 | -10.682608000 | -38.521368000 | 23.055533000 |
| 1 | -17.268364000 | -28.044255000 | 27.971144000 | 1 | -13.476561000 | -40.642668000 | 31.038477000 |
| 1 | -16.001305000 | -29.955416000 | 28.330284000 | 1 | -9.849396000  | -38.329992000 | 31.983913000 |
| 1 | -16.885331000 | -30.213578000 | 26.021661000 | 1 | -13.131283000 | -37.310640000 | 34.318222000 |
| 1 | -15.494909000 | -29.330530000 | 25.378393000 | 1 | -17.161489000 | -39.213645000 | 33.731242000 |
| 1 | -16.518028000 | -32.510413000 | 27.081484000 | 1 | -17.110720000 | -34.325815000 | 37.823726000 |
| 1 | -13.366350000 | -30.427503000 | 25.033357000 | 1 | -14.559629000 | -29.130923000 | 27.695173000 |
| 1 | -15.246766000 | -34.623795000 | 26.887722000 | 1 | -21.156392000 | -25.716335000 | 26.382482000 |
| 1 | -12.070872000 | -32.534854000 | 24.872796000 | 1 | -16.187010000 | -24.948814000 | 27.804903000 |

|   |               |               |              |
|---|---------------|---------------|--------------|
| 8 | -20.988531000 | -42.094781000 | 26.764279000 |
| 1 | -20.611824000 | -40.361876000 | 27.310041000 |
| 1 | -20.510101000 | -42.626288000 | 26.102361000 |

**4P<sub>OD,AIII</sub>**

|    |               |               |              |
|----|---------------|---------------|--------------|
| 6  | -21.684982000 | -45.764485000 | 27.184739000 |
| 6  | -21.751560000 | -45.148853000 | 31.974672000 |
| 6  | -16.935984000 | -44.366729000 | 31.868941000 |
| 6  | -17.095240000 | -44.105468000 | 27.053836000 |
| 6  | -22.093655000 | -45.774329000 | 28.505089000 |
| 6  | -23.437938000 | -46.080863000 | 28.947616000 |
| 6  | -23.472164000 | -45.856845000 | 30.288838000 |
| 6  | -22.143672000 | -45.441619000 | 30.678556000 |
| 6  | -20.440621000 | -44.843147000 | 32.391134000 |
| 6  | -20.030948000 | -44.654501000 | 33.734178000 |
| 6  | -18.658027000 | -44.465538000 | 33.706140000 |
| 6  | -18.269592000 | -44.534253000 | 32.343530000 |
| 6  | -16.555413000 | -44.281730000 | 30.548269000 |
| 6  | -15.205169000 | -44.018315000 | 30.089410000 |
| 6  | -15.256319000 | -43.909209000 | 28.737041000 |
| 6  | -16.638561000 | -44.126416000 | 28.359191000 |
| 6  | -18.400028000 | -44.471859000 | 26.642816000 |
| 6  | -18.843802000 | -44.536136000 | 25.298241000 |
| 6  | -20.128675000 | -45.068904000 | 25.333015000 |
| 6  | -20.434965000 | -45.294046000 | 26.700486000 |
| 7  | -21.315719000 | -45.404785000 | 29.580115000 |
| 7  | -19.353669000 | -44.757890000 | 31.535704000 |
| 7  | -17.415708000 | -44.360536000 | 29.470147000 |
| 7  | -19.38589000  | -44.915155000 | 27.499960000 |
| 26 | -19.342333000 | -44.958792000 | 29.527827000 |
| 1  | -22.512832000 | -45.197397000 | 32.748288000 |
| 1  | -16.162598000 | -44.249847000 | 32.622119000 |
| 1  | -16.374732000 | -43.817249000 | 26.292364000 |
| 1  | -22.411335000 | -46.071722000 | 26.438104000 |
| 6  | -15.934872000 | -36.178535000 | 29.071287000 |
| 6  | -17.838665000 | -37.312738000 | 28.692908000 |
| 6  | -19.143630000 | -37.824215000 | 28.569720000 |
| 6  | -16.922370000 | -39.328139000 | 27.601681000 |
| 6  | -16.740371000 | -38.079629000 | 28.203775000 |
| 6  | -17.299822000 | -36.093542000 | 29.239956000 |
| 6  | -19.321691000 | -39.066732000 | 27.973077000 |
| 6  | -18.222449000 | -39.817506000 | 27.495084000 |
| 7  | -15.589336000 | -37.359792000 | 28.450082000 |
| 1  | -14.641349000 | -37.650678000 | 28.208399000 |
| 6  | -18.088320000 | -34.965046000 | 29.845485000 |
| 6  | -17.219260000 | -33.879661000 | 30.501140000 |
| 7  | -18.006677000 | -32.788881000 | 31.058643000 |
| 6  | -18.524004000 | -31.822181000 | 30.289275000 |
| 8  | -18.353511000 | -31.788737000 | 29.045865000 |
| 6  | -19.361558000 | -30.777091000 | 30.996408000 |
| 1  | -18.147303000 | -32.786107000 | 32.083572000 |
| 8  | -20.607701000 | -39.570540000 | 27.889801000 |
| 6  | -19.675729000 | -41.893906000 | 30.039521000 |
| 1  | -15.163457000 | -35.474641000 | 29.351650000 |
| 1  | -20.009793000 | -37.272911000 | 28.923679000 |
| 1  | -16.082538000 | -39.896403000 | 27.212626000 |
| 1  | -18.400458000 | -40.782830000 | 27.026724000 |
| 1  | -18.783836000 | -35.356346000 | 30.599519000 |
| 1  | -18.705644000 | -34.481181000 | 29.076583000 |
| 1  | -16.637829000 | -34.306120000 | 31.323899000 |
| 1  | -16.523235000 | -33.465909000 | 29.763300000 |
| 1  | -19.221699000 | -29.814865000 | 30.496154000 |
| 1  | -19.107513000 | -30.676812000 | 32.054200000 |
| 1  | -20.421420000 | -31.051730000 | 30.911494000 |
| 1  | -20.052621000 | -40.892409000 | 29.795434000 |
| 1  | -19.017007000 | -42.028636000 | 30.907871000 |
| 1  | -20.778713000 | -42.523332000 | 27.619980000 |
| 6  | -19.604767000 | -48.061847000 | 30.768947000 |
| 16 | -18.670876000 | -47.095814000 | 29.509589000 |
| 1  | -20.047249000 | -47.371788000 | 31.489915000 |
| 1  | -18.853959000 | -48.652750000 | 31.307839000 |
| 6  | -14.569573000 | -37.831589000 | 22.011654000 |
| 6  | -13.157256000 | -38.281400000 | 22.361069000 |
| 8  | -12.700750000 | -39.348789000 | 21.923498000 |
| 6  | -15.673564000 | -38.683108000 | 22.681347000 |
| 6  | -17.040730000 | -38.331670000 | 22.058220000 |
| 6  | -15.660747000 | -38.506533000 | 24.206164000 |
| 6  | -18.196303000 | -39.237368000 | 22.500767000 |
| 1  | -14.715754000 | -36.774561000 | 22.270242000 |
| 1  | -15.457305000 | -39.736357000 | 22.449352000 |
| 1  | -17.285287000 | -37.286231000 | 22.298332000 |
| 1  | -16.951986000 | -38.381738000 | 20.963158000 |
| 1  | -16.452392000 | -39.089139000 | 24.685606000 |
| 1  | -14.717144000 | -38.831489000 | 24.656466000 |
| 1  | -15.824057000 | -37.454452000 | 24.478029000 |
| 1  | -19.119876000 | -38.977643000 | 21.969253000 |
| 1  | -17.975170000 | -40.291340000 | 22.287000000 |
| 1  | -18.398373000 | -39.150710000 | 23.573226000 |
| 7  | -12.441177000 | -37.427295000 | 23.129209000 |
| 6  | -11.108459000 | -37.706139000 | 23.644841000 |
| 6  | -11.151751000 | -38.065763000 | 25.129057000 |
| 8  | -11.839082000 | -37.042404000 | 25.827581000 |
| 1  | -12.941563000 | -36.700536000 | 23.625308000 |

|   |               |               |              |
|---|---------------|---------------|--------------|
| 1 | -10.492023000 | -36.810164000 | 23.497951000 |
| 1 | -11.665889000 | -39.025351000 | 25.258853000 |
| 1 | -10.115966000 | -38.178870000 | 25.494191000 |
| 1 | -12.356637000 | -37.498272000 | 26.539837000 |
| 6 | -12.152177000 | -42.451972000 | 24.417081000 |
| 6 | -11.488752000 | -42.936229000 | 23.132096000 |
| 8 | -11.102313000 | -44.098821000 | 23.008590000 |
| 6 | -13.521676000 | -43.117423000 | 24.631553000 |
| 8 | -14.059157000 | -42.862303000 | 25.919615000 |
| 1 | -11.502041000 | -42.737617000 | 25.251846000 |
| 1 | -14.213158000 | -42.783914000 | 23.839570000 |
| 1 | -13.410669000 | -44.202205000 | 24.536097000 |
| 1 | -13.937147000 | -41.903407000 | 26.130414000 |
| 7 | -11.362255000 | -41.997850000 | 22.148507000 |
| 6 | -10.793901000 | -42.314149000 | 20.851812000 |
| 6 | -11.682572000 | -41.857525000 | 19.674277000 |
| 6 | -13.011033000 | -42.576929000 | 19.583886000 |
| 6 | -13.126783000 | -43.789036000 | 18.889685000 |
| 6 | -14.151831000 | -42.053480000 | 20.209327000 |
| 6 | -14.346024000 | -44.464775000 | 18.820886000 |
| 6 | -15.373066000 | -42.727505000 | 20.142682000 |
| 6 | -15.475371000 | -43.934929000 | 19.448651000 |
| 1 | -11.753411000 | -41.067506000 | 22.279256000 |
| 1 | -10.641450000 | -43.396464000 | 20.834482000 |
| 1 | -11.852417000 | -40.778304000 | 19.765340000 |
| 1 | -11.110284000 | -42.010701000 | 18.750061000 |
| 1 | -12.250612000 | -44.207689000 | 18.397348000 |
| 1 | -14.069007000 | -41.113101000 | 20.748190000 |
| 1 | -14.414314000 | -45.403971000 | 18.276644000 |
| 1 | -16.247284000 | -42.306358000 | 20.633851000 |
| 1 | -16.426796000 | -44.458699000 | 19.396999000 |
| 6 | -24.476130000 | -43.427689000 | 25.709527000 |
| 6 | -24.836506000 | -41.984524000 | 26.053257000 |
| 8 | -26.005147000 | -41.573242000 | 25.949757000 |
| 6 | -25.258899000 | -43.933154000 | 24.480446000 |
| 8 | -26.653318000 | -43.910863000 | 24.728932000 |
| 6 | -24.878581000 | -45.362639000 | 24.108834000 |
| 1 | -23.395401000 | -43.532074000 | 25.558304000 |
| 1 | -25.011270000 | -43.273611000 | 23.627710000 |
| 1 | -26.813587000 | -43.031270000 | 25.136977000 |
| 1 | -25.482068000 | -45.698439000 | 23.258815000 |
| 1 | -23.819505000 | -45.435182000 | 23.834096000 |
| 1 | -25.074526000 | -46.040008000 | 24.948891000 |
| 7 | -23.823055000 | -41.205941000 | 26.484332000 |
| 6 | -24.021464000 | -39.817814000 | 26.894591000 |
| 6 | -24.044642000 | -38.807293000 | 25.727210000 |
| 6 | -22.713863000 | -38.818741000 | 24.950280000 |
| 6 | -24.392150000 | -37.416798000 | 26.280130000 |
| 6 | -22.703939000 | -37.951859000 | 23.685650000 |
| 1 | -22.884114000 | -41.597549000 | 26.536354000 |
| 1 | -23.211389000 | -39.563307000 | 27.586441000 |
| 1 | -24.849441000 | -39.122157000 | 25.047599000 |
| 1 | -21.904744000 | -38.505294000 | 25.624395000 |
| 1 | -22.489105000 | -39.854775000 | 24.663480000 |
| 1 | -24.501683000 | -36.677773000 | 25.479484000 |
| 1 | -25.336279000 | -37.439556000 | 26.838171000 |
| 1 | -23.609037000 | -37.057600000 | 26.960534000 |
| 1 | -21.757384000 | -38.065232000 | 23.144059000 |
| 1 | -23.515316000 | -38.237339000 | 23.003193000 |
| 1 | -22.821647000 | -36.887038000 | 23.915586000 |
| 6 | -21.281015000 | -26.614752000 | 31.578364000 |
| 6 | -21.057413000 | -26.723013000 | 33.086778000 |
| 8 | -21.729551000 | -26.064440000 | 33.887422000 |
| 6 | -22.563508000 | -27.335238000 | 31.105449000 |
| 6 | -23.894877000 | -26.875754000 | 31.733893000 |
| 6 | -24.146787000 | -25.372696000 | 31.547089000 |
| 6 | -25.053364000 | -27.706326000 | 31.160545000 |
| 1 | -21.343330000 | -25.546906000 | 31.340616000 |
| 1 | -22.629417000 | -27.215649000 | 30.012687000 |
| 1 | -22.442270000 | -28.412388000 | 31.285975000 |
| 1 | -23.836926000 | -27.062136000 | 32.813011000 |
| 1 | -25.141287000 | -25.096060000 | 31.920111000 |
| 1 | -23.409104000 | -24.787378000 | 32.102982000 |
| 1 | -24.099535000 | -25.086595000 | 30.486307000 |
| 1 | -26.005765000 | -27.439515000 | 31.635612000 |
| 1 | -25.164229000 | -27.539133000 | 30.079856000 |
| 1 | -24.891842000 | -28.780502000 | 31.314267000 |
| 7 | -20.104998000 | -27.607280000 | 33.468701000 |
| 6 | -19.755600000 | -27.891951000 | 34.852666000 |
| 6 | -19.281231000 | -29.349851000 | 34.970488000 |
| 8 | -18.330269000 | -29.533479000 | 33.938642000 |
| 6 | -20.434665000 | -30.357682000 | 34.873883000 |
| 1 | -19.532997000 | -28.088595000 | 32.785415000 |
| 1 | -20.631254000 | -27.691285000 | 35.475960000 |
| 1 | -18.799206000 | -29.462806000 | 35.955451000 |
| 1 | -17.795548000 | -30.358975000 | 34.150958000 |
| 1 | -20.036764000 | -31.376131000 | 34.824380000 |
| 1 | -21.103538000 | -30.281774000 | 35.741634000 |
| 1 | -21.025776000 | -30.179053000 | 33.968039000 |
| 6 | -20.426599000 | -26.262869000 | 26.986721000 |
| 6 | -19.040779000 | -25.863490000 | 26.472902000 |
| 8 | -18.837999000 | -25.634909000 | 25.284053000 |
| 6 | -20.684444000 | -27.771031000 | 26.833649000 |

|   |               |               |              |                   |               |               |              |
|---|---------------|---------------|--------------|-------------------|---------------|---------------|--------------|
| 6 | -19.820593000 | -28.625284000 | 27.768993000 | 1                 | -14.144866000 | -41.335957000 | 28.749199000 |
| 8 | -19.211811000 | -28.114562000 | 28.727298000 | 8                 | -19.997208000 | -42.850508000 | 29.344856000 |
| 7 | -19.761242000 | -29.937719000 | 27.495569000 | 1                 | -14.347137000 | -43.916051000 | 30.742015000 |
| 1 | -20.559354000 | -25.977748000 | 28.034650000 | 1                 | -14.469169000 | -43.708276000 | 28.019959000 |
| 1 | -21.738433000 | -27.985162000 | 27.058273000 | 1                 | -20.687641000 | -44.663474000 | 34.594801000 |
| 1 | -20.515443000 | -28.074537000 | 25.793061000 | 1                 | -17.988901000 | -44.284784000 | 34.537284000 |
| 1 | -20.268198000 | -30.316348000 | 26.708304000 | 1                 | -24.309879000 | -45.958350000 | 30.967428000 |
| 1 | -19.228438000 | -30.593745000 | 28.105358000 | 1                 | -24.242995000 | -46.398520000 | 28.296887000 |
| 7 | -18.071274000 | -25.790913000 | 27.437228000 | 1                 | -20.786199000 | -45.286276000 | 24.500486000 |
| 6 | -16.668212000 | -25.638820000 | 27.101249000 | 1                 | -18.253246000 | -44.260272000 | 24.434030000 |
| 6 | -15.803934000 | -26.915410000 | 27.050141000 | 6                 | -20.668141000 | -48.983978000 | 30.169340000 |
| 8 | -14.678079000 | -26.847572000 | 26.560480000 | 1                 | -20.226890000 | -49.671960000 | 29.439530000 |
| 1 | -18.321125000 | -26.179562000 | 28.339531000 | 1                 | -21.141685000 | -49.584021000 | 30.959268000 |
| 1 | -16.618258000 | -25.189055000 | 26.108224000 | 1                 | -21.448986000 | -48.410154000 | 29.661849000 |
| 7 | -16.329902000 | -28.045300000 | 27.585143000 | 1                 | -20.675070000 | -36.572544000 | 36.272701000 |
| 6 | -15.622795000 | -29.320538000 | 27.523820000 | 1                 | -18.946238000 | -27.222423000 | 35.177145000 |
| 6 | -15.813495000 | -30.025982000 | 26.162813000 | 1                 | -20.432670000 | -27.025209000 | 31.017590000 |
| 6 | -15.037584000 | -31.321126000 | 26.055231000 | 1                 | -24.748208000 | -44.055303000 | 26.569722000 |
| 6 | -15.550926000 | -32.516454000 | 26.581576000 | 1                 | -24.971295000 | -39.763345000 | 27.436127000 |
| 6 | -13.776733000 | -31.348834000 | 25.442450000 | 1                 | -9.807336000  | -41.836836000 | 20.744758000 |
| 6 | -14.826760000 | -33.707075000 | 26.483012000 | 1                 | -12.267801000 | -41.363393000 | 24.436183000 |
| 6 | -13.047985000 | -32.536647000 | 25.351037000 | 1                 | -14.655934000 | -37.916476000 | 20.921291000 |
| 6 | -13.570597000 | -33.724938000 | 25.868008000 | 1                 | -10.682608000 | -38.521368000 | 23.055533000 |
| 1 | -17.268364000 | -28.044255000 | 27.971144000 | 1                 | -13.476561000 | -40.642668000 | 31.038477000 |
| 1 | -16.001305000 | -29.955416000 | 28.330284000 | 1                 | -9.849396000  | -38.329992000 | 31.983913000 |
| 1 | -16.885331000 | -30.213578000 | 26.021661000 | 1                 | -13.131283000 | -37.310640000 | 34.318222000 |
| 1 | -15.494909000 | -29.330530000 | 25.378393000 | 1                 | -17.161489000 | -39.213645000 | 33.731242000 |
| 1 | -16.518028000 | -32.510413000 | 27.081484000 | 1                 | -17.110720000 | -34.325815000 | 37.823726000 |
| 1 | -13.366350000 | -30.427503000 | 25.033357000 | 1                 | -14.559629000 | -29.130923000 | 27.695173000 |
| 1 | -15.246766000 | -34.623795000 | 26.887722000 | 1                 | -21.156392000 | -25.716335000 | 26.382482000 |
| 1 | -12.070872000 | -32.534854000 | 24.872796000 | 1                 | -16.187010000 | -24.948814000 | 27.804903000 |
| 1 | -13.004592000 | -34.651744000 | 25.800268000 | 8                 | -20.988531000 | -42.094781000 | 26.764279000 |
| 6 | -17.689586000 | -33.978518000 | 36.961464000 | 1                 | -20.611824000 | -40.361876000 | 27.310041000 |
| 6 | -18.837826000 | -34.988357000 | 36.836522000 | 1                 | -20.510101000 | -42.626288000 | 26.102361000 |
| 8 | -19.302842000 | -35.520603000 | 37.846589000 | <b>'1IM2Hy,B'</b> |               |               |              |
| 6 | -16.750900000 | -33.773575000 | 35.749100000 | 6                 | 1.025718000   | -0.782467000  | -1.575773000 |
| 6 | -17.312189000 | -32.798927000 | 34.696541000 | 6                 | 0.941877000   | -0.159255000  | -0.334595000 |
| 8 | -16.939681000 | -31.601422000 | 34.789005000 | 6                 | -0.114085000  | 0.747035000   | -0.106202000 |
| 8 | -18.131223000 | -33.271223000 | 33.838738000 | 6                 | 0.074648000   | -0.519525000  | -2.590214000 |
| 1 | -18.123449000 | -33.013273000 | 37.260586000 | 6                 | -0.969130000  | 0.367508000   | -2.383606000 |
| 1 | -15.815159000 | -33.341929000 | 36.118757000 | 6                 | -1.055679000  | 0.997350000   | -1.137001000 |
| 1 | -16.532188000 | -34.746451000 | 35.296689000 | 6                 | -0.489057000  | 1.559760000   | 1.026502000  |
| 7 | -19.294794000 | -35.223292000 | 35.576089000 | 6                 | -1.616907000  | 2.249656000   | 0.644826000  |
| 6 | -20.380474000 | -36.146709000 | 35.310793000 | 7                 | -1.966381000  | 1.914593000   | -0.648364000 |
| 6 | -19.998060000 | -37.286797000 | 34.343930000 | 8                 | 2.010786000   | -1.679788000  | -1.926853000 |
| 8 | -19.055545000 | -38.180119000 | 34.911854000 | 6                 | 0.190842000   | 1.620158000   | 2.365657000  |
| 6 | -19.542541000 | -36.767802000 | 32.975607000 | 6                 | -0.100816000  | 0.401208000   | 3.267191000  |
| 1 | -18.930280000 | -34.638165000 | 34.814185000 | 6                 | -0.100816000  | 0.401208000   | 3.267191000  |
| 1 | -21.244816000 | -35.605246000 | 34.893207000 | 7                 | -1.514349000  | 0.256696000   | 3.567500000  |
| 1 | -20.910778000 | -37.887523000 | 34.203518000 | 6                 | -2.026209000  | 0.386014000   | 4.829831000  |
| 1 | -18.195102000 | -37.719436000 | 35.008967000 | 6                 | -3.539991000  | 0.250028000   | 4.933207000  |
| 1 | -19.323770000 | -37.604848000 | 32.303590000 | 8                 | -1.330422000  | 0.582638000   | 5.819180000  |
| 1 | -20.316519000 | -36.143621000 | 32.510524000 | 1                 | 1.666826000   | -0.352886000  | 0.447368000  |
| 1 | -18.635376000 | -36.161501000 | 33.073006000 | 1                 | 0.189362000   | -1.025264000  | -3.543860000 |
| 6 | -14.034828000 | -36.791023000 | 34.647010000 | 1                 | -1.691056000  | 0.564461000   | -3.171712000 |
| 6 | -15.291403000 | -37.633280000 | 34.487591000 | 1                 | -2.196160000  | 2.975316000   | 1.200261000  |
| 8 | -16.366987000 | -37.250013000 | 34.963972000 | 1                 | -0.117753000  | 2.526707000   | 2.899550000  |
| 1 | -13.940543000 | -36.503134000 | 35.698225000 | 1                 | 1.279432000   | 1.689592000   | 2.231521000  |
| 1 | -14.153957000 | -35.867351000 | 34.069367000 | 1                 | 0.265833000   | -0.515097000  | 2.785933000  |
| 7 | -15.132189000 | -38.787549000 | 33.796966000 | 1                 | 0.407047000   | 0.507765000   | 4.228157000  |
| 6 | -16.216499000 | -39.725766000 | 33.538950000 | 1                 | -2.147712000  | 0.157720000   | 2.786747000  |
| 6 | -16.123738000 | -40.986650000 | 34.405474000 | 1                 | -2.727790000  | 2.319271000   | -1.169895000 |
| 1 | -14.205177000 | -39.007865000 | 33.432575000 | 1                 | -3.773172000  | -0.608204000  | 5.571350000  |
| 1 | -16.190268000 | -39.997170000 | 32.475215000 | 1                 | -3.940673000  | 1.140207000   | 5.427469000  |
| 1 | -16.940513000 | -41.677058000 | 34.160506000 | 1                 | -4.041923000  | 0.119256000   | 3.968934000  |
| 1 | -15.171145000 | -41.508904000 | 34.250171000 | 6                 | 3.030609000   | -1.999486000  | -0.950266000 |
| 1 | -16.203037000 | -40.726814000 | 35.466270000 | 1                 | 3.550056000   | -1.079475000  | -0.660320000 |
| 6 | -10.717622000 | -37.698393000 | 31.746737000 | 1                 | 2.526473000   | -2.437830000  | -0.073088000 |
| 6 | -11.910761000 | -38.655847000 | 31.677872000 | 8                 | 3.948241000   | -2.842391000  | -1.529237000 |
| 8 | -12.381451000 | -39.127194000 | 32.726593000 | 1                 | 3.467601000   | -3.662241000  | -1.783956000 |
| 6 | -10.390081000 | -36.830670000 | 30.520090000 | 8                 | 1.992660000   | -4.451913000  | -2.641031000 |
| 6 | -11.410362000 | -35.725951000 | 30.164504000 | 1                 | 1.643212000   | -3.539153000  | -2.632621000 |
| 6 | -11.520426000 | -34.663002000 | 31.268722000 | 1                 | 2.311774000   | -4.573164000  | -3.548928000 |
| 6 | -11.038578000 | -35.079679000 | 28.821004000 | <b>'1TSB'</b>     |               |               |              |
| 1 | -10.877049000 | -37.079108000 | 32.635008000 | 6                 | 1.205524000   | -0.899392000  | -1.354223000 |
| 1 | -9.416831000  | -36.350662000 | 30.700571000 | 6                 | 1.068771000   | -0.151843000  | -0.196900000 |
| 1 | -10.235722000 | -37.474785000 | 29.643164000 | 6                 | -0.095463000  | 0.622160000   | -0.048328000 |
| 1 | -12.398562000 | -36.194426000 | 30.048192000 | 6                 | 0.239814000   | -0.919771000  | -2.379157000 |
| 1 | -12.238326000 | -33.884249000 | 30.987382000 | 6                 | -0.910715000  | -0.152512000  | -2.252766000 |
| 1 | -11.853638000 | -35.083771000 | 32.224090000 | 6                 | -1.068128000  | 0.607152000   | -1.088397000 |
| 1 | -10.550906000 | -34.173974000 | 31.436565000 | 6                 | -0.572082000  | 1.518250000   | 0.978676000  |
| 1 | -11.750699000 | -34.291169000 | 28.551460000 | 6                 | -1.782114000  | 1.994285000   | 0.533914000  |
| 1 | -10.041268000 | -34.620467000 | 28.874948000 | 7                 | -2.087769000  | 1.450034000   | -0.700004000 |
| 1 | -11.034330000 | -35.810072000 | 28.003905000 | 8                 | 2.371142000   | -1.675056000  | -1.519369000 |
| 7 | -12.347239000 | -39.006345000 | 30.453152000 | 6                 | 0.100070000   | 1.843174000   | 2.282892000  |
| 6 | -13.462396000 | -39.916315000 | 30.221411000 | 6                 | -0.014029000  | 0.723423000   | 3.340162000  |
| 6 | -13.318325000 | -40.630010000 | 28.872704000 | 7                 | -1.388434000  | 0.432477000   | 3.708107000  |
| 6 | -13.268728000 | -39.712461000 | 27.634425000 | 6                 | -1.914083000  | 0.762162000   | 4.929164000  |
| 8 | -12.950079000 | -38.488218000 | 27.834981000 | 6                 | -3.389382000  | 0.431258000   | 5.112324000  |
| 8 | -13.523946000 | -40.214387000 | 26.514594000 | 8                 | -1.252508000  | 1.269575000   | 5.826585000  |
| 1 | -12.085356000 | -38.484418000 | 29.621287000 | 1                 | 1.854412000   | -0.159948000  | 0.552453000  |
| 1 | -14.413040000 | -39.366508000 | 30.255703000 | 1                 | 0.433377000   | -1.525005000  | -3.259394000 |
| 1 | -12.396655000 | -41.229280000 | 28.867095000 |                   |               |               |              |

|   |              |              |              |
|---|--------------|--------------|--------------|
| 1 | -1.660291000 | -0.146544000 | -3.039279000 |
| 1 | -2.453718000 | 2.701355000  | 1.002363000  |
| 1 | -0.328837000 | 2.759576000  | 2.704580000  |
| 1 | 1.167279000  | 2.043790000  | 2.114810000  |
| 1 | 0.463274000  | -0.192790000 | 2.969349000  |
| 1 | 0.491698000  | 1.023796000  | 4.260289000  |
| 1 | -2.005334000 | 0.090326000  | 2.985307000  |
| 1 | -2.900848000 | 1.676510000  | -1.251122000 |
| 1 | -3.487592000 | -0.302760000 | 5.918456000  |
| 1 | -3.916379000 | 1.335523000  | 5.431086000  |
| 1 | -3.871423000 | 0.033401000  | 4.213319000  |
| 6 | 2.295581000  | -3.143410000 | -0.912008000 |
| 1 | 2.446741000  | -3.003483000 | 0.160003000  |
| 1 | 1.262909000  | -3.427135000 | -1.158590000 |
| 8 | 3.268128000  | -3.847423000 | -1.486997000 |
| 1 | 3.124841000  | -3.670742000 | -2.508045000 |
| 8 | 2.613666000  | -2.669752000 | -3.577217000 |
| 1 | 2.532184000  | -1.949778000 | -2.533013000 |
| 1 | 3.323450000  | -2.376085000 | -4.165370000 |

**1Pod,B'**

|   |              |              |              |
|---|--------------|--------------|--------------|
| 6 | 1.219462000  | -0.574574000 | -1.350539000 |
| 6 | 1.017379000  | 0.185946000  | -0.202803000 |
| 6 | -0.187795000 | 0.895054000  | -0.058610000 |
| 6 | 0.230423000  | -0.642620000 | -2.360750000 |
| 6 | -0.966135000 | 0.053371000  | -2.237543000 |
| 6 | -1.166508000 | 0.817947000  | -1.085694000 |
| 6 | -0.710122000 | 1.770765000  | 0.965876000  |
| 6 | -1.951331000 | 2.174518000  | 0.530487000  |
| 7 | -2.237252000 | 1.603862000  | -0.694057000 |
| 8 | 2.401497000  | -1.257239000 | -1.467868000 |
| 6 | -0.046906000 | 2.143363000  | 2.262287000  |
| 6 | -0.062452000 | 1.013533000  | 3.313011000  |
| 7 | -1.414565000 | 0.612275000  | 3.661771000  |
| 6 | -1.897422000 | 0.631949000  | 4.939867000  |
| 6 | -3.358092000 | 0.223298000  | 5.087157000  |
| 8 | -1.218349000 | 0.944243000  | 5.911703000  |
| 1 | 1.798151000  | 0.223511000  | 0.551088000  |
| 1 | 0.419111000  | -1.251225000 | -3.240688000 |
| 1 | -1.718714000 | -0.001839000 | -3.020155000 |
| 1 | -2.655932000 | 2.848211000  | 1.000463000  |
| 1 | -0.537478000 | 3.025055000  | 2.692234000  |
| 1 | 1.000736000  | 2.421147000  | 2.081392000  |
| 1 | 0.495626000  | 0.147025000  | 2.933245000  |
| 1 | 0.412016000  | 1.340567000  | 4.240879000  |
| 1 | -2.038544000 | 0.388981000  | 2.898720000  |
| 1 | -3.059695000 | 1.789436000  | -1.245519000 |
| 1 | -3.413955000 | -0.656373000 | 5.736102000  |
| 1 | -3.900994000 | 1.030865000  | 5.587810000  |
| 1 | -3.853737000 | -0.005670000 | 4.138059000  |
| 6 | 2.882628000  | -4.408142000 | -0.658165000 |
| 1 | 3.004269000  | -5.017151000 | 0.257644000  |
| 1 | 2.717075000  | -3.324341000 | -0.530672000 |
| 8 | 2.934109000  | -4.928045000 | -1.757418000 |
| 1 | 2.654736000  | -3.712670000 | -3.137784000 |
| 8 | 2.551451000  | -2.885538000 | -3.658978000 |
| 1 | 2.438420000  | -1.721554000 | -2.340239000 |
| 1 | 3.382624000  | -2.793144000 | -4.148650000 |

**1IM2Hy,B''**

|   |              |              |              |
|---|--------------|--------------|--------------|
| 6 | 1.087983000  | -1.000452000 | -1.475550000 |
| 6 | 1.000646000  | -0.292694000 | -0.281350000 |
| 6 | -0.059560000 | 0.622850000  | -0.119750000 |
| 6 | 0.141308000  | -0.814685000 | -2.510890000 |
| 6 | -0.902061000 | 0.085719000  | -2.371028000 |
| 6 | -0.995235000 | 0.799849000  | -1.171217000 |
| 6 | -0.443351000 | 1.510807000  | 0.952040000  |
| 6 | -1.570535000 | 2.169709000  | 0.517451000  |
| 7 | -1.910438000 | 1.746719000  | -0.752211000 |
| 8 | 2.085491000  | -1.908721000 | -1.756368000 |
| 6 | 0.227639000  | 1.666391000  | 2.288058000  |
| 6 | -0.045418000 | 0.498938000  | 3.260663000  |
| 7 | -1.458156000 | 0.342576000  | 3.558790000  |
| 6 | -1.983020000 | 0.530176000  | 4.808146000  |
| 6 | -3.494390000 | 0.366747000  | 4.907809000  |
| 8 | -1.299875000 | 0.794738000  | 5.790583000  |
| 1 | 1.731685000  | -0.422295000 | 0.508664000  |
| 1 | 0.249163000  | -1.401308000 | -3.417947000 |
| 1 | -1.623553000 | 0.222799000  | -3.172101000 |
| 1 | -2.155620000 | 2.929108000  | 1.019071000  |
| 1 | -0.102613000 | 2.597586000  | 2.763363000  |
| 1 | 1.315632000  | 1.749361000  | 2.155776000  |
| 1 | 0.344553000  | -0.436739000 | 2.838642000  |
| 1 | 0.452076000  | 0.674837000  | 4.216831000  |
| 1 | -2.082587000 | 0.187521000  | 2.779931000  |
| 1 | -2.673695000 | 2.107359000  | -1.302501000 |
| 1 | -3.714468000 | -0.476117000 | 5.570836000  |
| 1 | -3.915469000 | 1.263530000  | 5.371971000  |
| 1 | -3.987625000 | 0.195757000  | 3.945354000  |
| 6 | 2.940642000  | -2.375632000 | -0.678801000 |
| 1 | 3.571913000  | -1.541473000 | -0.352267000 |
| 1 | 2.284600000  | -2.698705000 | 0.144141000  |
| 8 | 3.751054000  | -3.368886000 | -1.160499000 |

|   |             |              |              |
|---|-------------|--------------|--------------|
| 1 | 3.220130000 | -4.203096000 | -1.243659000 |
| 8 | 1.880274000 | -3.775247000 | -3.849517000 |
| 1 | 1.969008000 | -3.057023000 | -3.184143000 |
| 1 | 2.724284000 | -3.749102000 | -4.326456000 |
| 8 | 2.155078000 | -5.495332000 | -1.739626000 |
| 1 | 2.659234000 | -6.287696000 | -1.978133000 |
| 1 | 1.937308000 | -5.057047000 | -2.600555000 |

**1TSB''**

|   |              |              |              |
|---|--------------|--------------|--------------|
| 6 | 1.077578000  | -1.196303000 | -1.299188000 |
| 6 | 1.008325000  | -0.372494000 | -0.187888000 |
| 6 | -0.092890000 | 0.494777000  | -0.081863000 |
| 6 | 0.108624000  | -1.203075000 | -2.320520000 |
| 6 | -0.977339000 | -0.341461000 | -2.236298000 |
| 6 | -1.070845000 | 0.492711000  | -1.117047000 |
| 6 | -0.494670000 | 1.481821000  | 0.892675000  |
| 6 | -1.669385000 | 2.019641000  | 0.424467000  |
| 7 | -2.022573000 | 1.430197000  | -0.775464000 |
| 8 | 2.177068000  | -2.077058000 | -1.401261000 |
| 6 | 0.208831000  | 1.833031000  | 2.173368000  |
| 6 | 0.044360000  | 0.775976000  | 3.286764000  |
| 7 | -1.340761000 | 0.577124000  | 3.674880000  |
| 6 | -1.834638000 | 0.970150000  | 4.890334000  |
| 6 | -3.323832000 | 0.726179000  | 5.095814000  |
| 8 | -1.137213000 | 1.466399000  | 5.766623000  |
| 1 | 1.797835000  | -0.393932000 | 0.557216000  |
| 1 | 0.261769000  | -1.865526000 | -3.167465000 |
| 1 | -1.727951000 | -0.321892000 | -3.021679000 |
| 1 | -2.283823000 | 2.799851000  | 0.853621000  |
| 1 | -0.164373000 | 2.792084000  | 2.550957000  |
| 1 | 1.283759000  | 1.964789000  | 1.986942000  |
| 1 | 0.471155000  | -0.181482000 | 2.960758000  |
| 1 | 0.571821000  | 1.094798000  | 4.188280000  |
| 1 | -1.982279000 | 0.244641000  | 2.969144000  |
| 1 | -2.821704000 | 1.682532000  | -1.335638000 |
| 1 | -3.453704000 | 0.021500000  | 5.923377000  |
| 1 | -3.797290000 | 1.666589000  | 5.393240000  |
| 1 | -3.836104000 | 0.330372000  | 4.212773000  |
| 6 | 2.001261000  | -3.489205000 | -0.564809000 |
| 1 | 1.755677000  | -3.086991000 | 0.418303000  |
| 1 | 1.144818000  | -3.918934000 | -1.095600000 |
| 8 | 3.127092000  | -4.159613000 | -0.602863000 |
| 1 | 3.168822000  | -4.699562000 | -1.505637000 |
| 8 | 2.272994000  | -2.988577000 | -3.589905000 |
| 1 | 2.298035000  | -2.376472000 | -2.334942000 |
| 1 | 2.880277000  | -2.547041000 | -4.201300000 |
| 8 | 3.037248000  | -5.233867000 | -2.877775000 |
| 1 | 3.926996000  | -5.408572000 | -3.220384000 |
| 1 | 2.719061000  | -4.302279000 | -3.328456000 |

**1Pod,B''**

|   |              |              |              |
|---|--------------|--------------|--------------|
| 6 | 1.213633000  | -0.884437000 | -1.395227000 |
| 6 | 1.059328000  | -0.078435000 | -0.270369000 |
| 6 | -0.106629000 | 0.696559000  | -0.141388000 |
| 6 | 0.215128000  | -0.933543000 | -2.398134000 |
| 6 | -0.941479000 | -0.171265000 | -2.289790000 |
| 6 | -1.094648000 | 0.637542000  | -1.160767000 |
| 6 | -0.575264000 | 1.631038000  | 0.856518000  |
| 6 | -1.796555000 | 2.084718000  | 0.414153000  |
| 7 | -2.119637000 | 1.490745000  | -0.789910000 |
| 8 | 2.354404000  | -1.637678000 | -1.489638000 |
| 6 | 0.115354000  | 2.011765000  | 2.136138000  |
| 6 | 0.052557000  | 0.918862000  | 3.223505000  |
| 7 | -1.314063000 | 0.593920000  | 3.593661000  |
| 6 | -1.787894000 | 0.691724000  | 4.872088000  |
| 6 | -3.266271000 | 0.364236000  | 5.042529000  |
| 8 | -1.088219000 | 1.012159000  | 5.826270000  |
| 1 | 1.850059000  | -0.050056000 | 0.473824000  |
| 1 | 0.371223000  | -1.572720000 | -3.261973000 |
| 1 | -1.700334000 | -0.209059000 | -3.067327000 |
| 1 | -2.462100000 | 2.808944000  | 0.865447000  |
| 1 | -0.328307000 | 2.929847000  | 2.539951000  |
| 1 | 1.173889000  | 2.232108000  | 1.940059000  |
| 1 | 0.566270000  | 0.014501000  | 2.869934000  |
| 1 | 0.548485000  | 1.253127000  | 4.137441000  |
| 1 | -1.953817000 | 0.372084000  | 2.843418000  |
| 1 | -2.936045000 | 1.699561000  | -1.342141000 |
| 1 | -3.364048000 | -0.457370000 | 5.758763000  |
| 1 | -3.772436000 | 1.233229000  | 5.474535000  |
| 1 | -3.770259000 | 0.084601000  | 4.111556000  |
| 6 | 2.254326000  | -3.701998000 | 0.059860000  |
| 1 | 2.506454000  | -2.975747000 | 0.849332000  |
| 1 | 1.223133000  | -3.656185000 | -0.327639000 |
| 8 | 3.055476000  | -4.542630000 | -0.307767000 |
| 1 | 2.705461000  | -5.375314000 | -1.863664000 |
| 8 | 2.411419000  | -3.067540000 | -3.788924000 |
| 1 | 2.378024000  | -2.122270000 | -2.358825000 |
| 1 | 3.224780000  | -2.891751000 | -4.284534000 |
| 8 | 2.576819000  | -5.604894000 | -2.813954000 |
| 1 | 3.373547000  | -6.101552000 | -3.053130000 |
| 1 | 2.460268000  | -4.026000000 | -3.530329000 |

**1IM2Hy,B'''**

|   |              |              |              |
|---|--------------|--------------|--------------|
| 6 | 0.878032000  | -1.065328000 | -1.551219000 |
| 6 | 0.861475000  | -0.360849000 | -0.351277000 |
| 6 | -0.150514000 | 0.600044000  | -0.147975000 |
| 6 | -0.095661000 | -0.827681000 | -2.550467000 |
| 6 | -1.092202000 | 0.117459000  | -2.371311000 |
| 6 | -1.112391000 | 0.827073000  | -1.165171000 |
| 6 | -0.456703000 | 1.496101000  | 0.941897000  |
| 6 | -1.566863000 | 2.208879000  | 0.550442000  |
| 7 | -1.968563000 | 1.811553000  | -0.709386000 |
| 8 | 1.815003000  | -2.019253000 | -1.874778000 |
| 6 | 0.265590000  | 1.608215000  | 2.255312000  |
| 6 | -0.031295000 | 0.446602000  | 3.227866000  |
| 7 | -1.439617000 | 0.356392000  | 3.570631000  |
| 6 | -1.912426000 | 0.535962000  | 4.841656000  |
| 6 | -3.426212000 | 0.447505000  | 4.988782000  |
| 8 | -1.184535000 | 0.738537000  | 5.806580000  |
| 1 | 1.610991000  | -0.527784000 | 0.414048000  |
| 1 | -0.046802000 | -1.414170000 | -3.462530000 |
| 1 | -1.833354000 | 0.292442000  | -3.146643000 |
| 1 | -2.099254000 | 2.990069000  | 1.076694000  |
| 1 | -0.002282000 | 2.550169000  | 2.748451000  |
| 1 | 1.351217000  | 1.639181000  | 2.086472000  |
| 1 | 0.299353000  | -0.502689000 | 2.785761000  |
| 1 | 0.504839000  | 0.588931000  | 4.168646000  |
| 1 | -2.096417000 | 0.250944000  | 2.810279000  |
| 1 | -2.733432000 | 2.210165000  | -1.230467000 |
| 1 | -3.667908000 | -0.399071000 | 5.639413000  |
| 1 | -3.784807000 | 1.352921000  | 5.487423000  |
| 1 | -3.958987000 | 0.325863000  | 4.039990000  |
| 6 | 2.705477000  | -2.475727000 | -0.845455000 |
| 1 | 3.390950000  | -1.665627000 | -0.568243000 |
| 1 | 2.105391000  | -2.775468000 | 0.026085000  |
| 8 | 3.459264000  | -3.522921000 | -1.343136000 |
| 1 | 2.886437000  | -4.345345000 | -1.369426000 |
| 8 | 1.885745000  | -5.434735000 | -4.274715000 |
| 1 | 2.419595000  | -6.073737000 | -4.769565000 |
| 1 | 2.407043000  | -4.586514000 | -4.319701000 |
| 8 | 3.370941000  | -3.170307000 | -4.111431000 |
| 1 | 2.707550000  | -2.470905000 | -3.988066000 |
| 1 | 3.668228000  | -3.300533000 | -3.182261000 |
| 8 | 1.906980000  | -5.674378000 | -1.588147000 |
| 1 | 2.382089000  | -6.491600000 | -1.376008000 |
| 1 | 1.802543000  | -5.683641000 | -2.580354000 |

**1TS<sub>B</sub>''''**

|   |              |              |              |
|---|--------------|--------------|--------------|
| 6 | 1.156178000  | -1.348139000 | -1.213850000 |
| 6 | 1.202181000  | -0.776910000 | 0.046548000  |
| 6 | 0.383637000  | 0.338636000  | 0.293664000  |
| 6 | 0.335028000  | -0.868091000 | -2.251955000 |
| 6 | -0.474056000 | 0.237883000  | -2.025578000 |
| 6 | -0.444259000 | 0.826779000  | -0.756663000 |
| 6 | 0.175454000  | 1.189721000  | 1.441678000  |
| 6 | -0.748230000 | 2.130099000  | 1.053281000  |
| 7 | -1.127775000 | 1.915868000  | -0.259334000 |
| 8 | 1.981818000  | -2.466298000 | -1.466090000 |
| 6 | 0.815602000  | 1.061052000  | 2.795346000  |
| 6 | 0.233581000  | -0.082367000 | 3.654278000  |
| 7 | -1.181366000 | 0.089123000  | 3.933225000  |
| 6 | -1.662241000 | 0.360577000  | 5.181913000  |
| 6 | -3.166947000 | 0.569485000  | 5.270577000  |
| 8 | -0.955856000 | 0.418704000  | 6.160287000  |
| 1 | 1.871188000  | -1.180569000 | 0.800316000  |
| 1 | 0.359373000  | -1.353732000 | -3.224236000 |
| 1 | -1.105010000 | 0.630910000  | -2.817954000 |
| 1 | -1.160424000 | 2.957808000  | 1.614898000  |
| 1 | 0.705278000  | 2.000416000  | 3.349488000  |
| 1 | 1.894633000  | 0.886237000  | 2.684047000  |
| 1 | 0.391114000  | -1.045323000 | 3.151295000  |
| 1 | 0.734371000  | -0.118063000 | 4.624106000  |
| 1 | -1.812118000 | 0.128415000  | 3.145165000  |
| 1 | -1.755884000 | 2.501708000  | -0.786975000 |
| 1 | -3.588295000 | -0.189376000 | 5.937305000  |
| 1 | -3.361380000 | 1.545283000  | 5.726013000  |
| 1 | -3.681141000 | 0.516149000  | 4.305409000  |
| 6 | 1.308591000  | -3.829574000 | -1.254321000 |
| 1 | 1.237428000  | -3.899667000 | -0.166668000 |
| 1 | 0.322586000  | -3.732491000 | -1.722654000 |
| 8 | 2.086406000  | -4.796760000 | -1.768705000 |
| 1 | 1.766778000  | -4.998298000 | -2.701983000 |
| 8 | 1.137118000  | -2.787079000 | -4.997992000 |
| 1 | 1.316242000  | -2.535159000 | -5.915520000 |
| 1 | 2.006346000  | -2.554299000 | -4.450289000 |
| 8 | 3.075013000  | -2.294286000 | -3.483479000 |
| 1 | 2.516899000  | -2.408309000 | -2.385432000 |
| 1 | 3.745460000  | -2.992159000 | -3.525895000 |
| 8 | 0.992744000  | -5.249875000 | -4.123222000 |
| 1 | 1.511470000  | -5.836327000 | -4.693283000 |
| 1 | 0.986972000  | -4.354962000 | -4.588067000 |

**1POD<sub>B</sub>''''**

|   |             |              |              |
|---|-------------|--------------|--------------|
| 6 | 1.282454000 | -0.863069000 | -1.454465000 |
| 6 | 1.257795000 | -0.218029000 | -0.220873000 |
| 6 | 0.249539000 | 0.726717000  | 0.035269000  |

|   |              |              |              |
|---|--------------|--------------|--------------|
| 6 | 0.305959000  | -0.580702000 | -2.438917000 |
| 6 | -0.696794000 | 0.353687000  | -2.206737000 |
| 6 | -0.717765000 | 1.001000000  | -0.969374000 |
| 6 | -0.056255000 | 1.571796000  | 1.167106000  |
| 6 | -1.167810000 | 2.300464000  | 0.812580000  |
| 7 | -1.576504000 | 1.961032000  | -0.462368000 |
| 8 | 2.275457000  | -1.779816000 | -1.673509000 |
| 6 | 0.671302000  | 1.622833000  | 2.481342000  |
| 6 | 0.368552000  | 0.422860000  | 3.403705000  |
| 7 | -1.041559000 | 0.329918000  | 3.740620000  |
| 6 | -1.513224000 | 0.416716000  | 5.021054000  |
| 6 | -3.029726000 | 0.358759000  | 5.158806000  |
| 8 | -0.784636000 | 0.521731000  | 6.001059000  |
| 1 | 2.027829000  | -0.447197000 | 0.509787000  |
| 1 | 0.347698000  | -1.107045000 | -3.388111000 |
| 1 | -1.439181000 | 0.567648000  | -2.971607000 |
| 1 | -1.697707000 | 3.057466000  | 1.375800000  |
| 1 | -0.412955000 | 2.545071000  | 3.015563000  |
| 1 | 1.756031000  | 1.650983000  | 2.308496000  |
| 1 | 0.693955000  | -0.507919000 | 2.920278000  |
| 1 | 0.905189000  | 0.519301000  | 4.350027000  |
| 1 | -1.698454000 | 0.306550000  | 2.973164000  |
| 1 | -2.331952000 | 2.396544000  | -0.966993000 |
| 1 | -3.294167000 | -0.506672000 | 5.774506000  |
| 1 | -3.369377000 | 1.252069000  | 5.691920000  |
| 1 | -3.561236000 | 0.288745000  | 4.204023000  |
| 6 | 1.954849000  | -4.240682000 | -0.576208000 |
| 1 | 1.832047000  | -3.671977000 | 0.361179000  |
| 1 | 1.118047000  | -4.187102000 | -1.293110000 |
| 8 | 2.943169000  | -4.919321000 | -0.781319000 |
| 1 | 3.022950000  | -5.473185000 | -2.555450000 |
| 8 | 0.141743000  | -4.907899000 | -3.698455000 |
| 1 | -0.522401000 | -5.168161000 | -4.353494000 |
| 1 | 0.550923000  | -4.088321000 | -4.045343000 |
| 8 | 2.168495000  | -3.026694000 | -4.125328000 |
| 1 | 2.245235000  | -2.110791000 | -2.603300000 |
| 1 | 2.631178000  | -2.653167000 | -4.890495000 |
| 8 | 2.850160000  | -5.492738000 | -3.523713000 |
| 1 | 2.615691000  | -3.911889000 | -3.929151000 |
| 1 | 1.894054000  | -5.702774000 | -3.589267000 |

**2ReaII**

|   |              |              |              |
|---|--------------|--------------|--------------|
| 6 | 43.219075000 | 47.597348000 | 31.763620000 |
| 6 | 44.065572000 | 46.638525000 | 30.924275000 |
| 8 | 43.822277000 | 46.448796000 | 29.729483000 |
| 6 | 41.708486000 | 47.377667000 | 31.550340000 |
| 6 | 40.900914000 | 48.534105000 | 32.171748000 |
| 6 | 41.272397000 | 46.005415000 | 32.087169000 |
| 6 | 39.403619000 | 48.518925000 | 31.838922000 |
| 1 | 43.480741000 | 47.528038000 | 32.826299000 |
| 1 | 41.546698000 | 47.385938000 | 30.463607000 |
| 1 | 41.028497000 | 48.520357000 | 33.264201000 |
| 1 | 41.327965000 | 49.486253000 | 31.825643000 |
| 1 | 40.218268000 | 45.800138000 | 31.868899000 |
| 1 | 41.862806000 | 45.202152000 | 31.634228000 |
| 1 | 41.403210000 | 45.948252000 | 33.175987000 |
| 1 | 38.901489000 | 47.639084000 | 32.256229000 |
| 1 | 38.902300000 | 49.405988000 | 32.244994000 |
| 1 | 39.241592000 | 48.511800000 | 30.753074000 |
| 7 | 45.095370000 | 46.034383000 | 31.573186000 |
| 6 | 46.034428000 | 45.181054000 | 30.855952000 |
| 6 | 45.584569000 | 43.729378000 | 30.693417000 |
| 8 | 45.597181000 | 43.077957000 | 31.947943000 |
| 1 | 45.290007000 | 46.279461000 | 32.541761000 |
| 1 | 46.987065000 | 45.202781000 | 31.395965000 |
| 1 | 44.584925000 | 43.719947000 | 30.233198000 |
| 1 | 46.277636000 | 43.239501000 | 29.987906000 |
| 1 | 45.305916000 | 42.140272000 | 31.811279000 |
| 6 | 36.139429000 | 39.103105000 | 34.909639000 |
| 6 | 35.067969000 | 39.694004000 | 35.812706000 |
| 8 | 34.793853000 | 39.172913000 | 36.898813000 |
| 6 | 37.466156000 | 38.950139000 | 35.682961000 |
| 8 | 37.356075000 | 38.034259000 | 36.756610000 |
| 1 | 35.804747000 | 38.108239000 | 34.592353000 |
| 1 | 38.234763000 | 38.561129000 | 35.007890000 |
| 1 | 37.804069000 | 39.938014000 | 36.030699000 |
| 1 | 36.546821000 | 38.285800000 | 37.243124000 |
| 7 | 34.443842000 | 40.819846000 | 35.362560000 |
| 6 | 33.548118000 | 41.612460000 | 36.193722000 |
| 6 | 34.176539000 | 42.944001000 | 36.664192000 |
| 6 | 35.442424000 | 42.755636000 | 37.472153000 |
| 6 | 35.379736000 | 42.371118000 | 38.818660000 |
| 6 | 36.703045000 | 42.904048000 | 36.879097000 |
| 6 | 36.543602000 | 42.124092000 | 39.546753000 |
| 6 | 37.872502000 | 42.654522000 | 37.603040000 |
| 6 | 37.794958000 | 42.257879000 | 38.940015000 |
| 1 | 34.795798000 | 41.241226000 | 34.513918000 |
| 1 | 33.297536000 | 40.983809000 | 37.050664000 |
| 1 | 34.382581000 | 43.572959000 | 35.787186000 |
| 1 | 33.416528000 | 43.474395000 | 37.253702000 |
| 1 | 34.409631000 | 42.254645000 | 39.298183000 |
| 1 | 36.773255000 | 43.219091000 | 35.839544000 |
| 1 | 36.474315000 | 41.822133000 | 40.588477000 |

|   |              |              |              |    |              |              |              |
|---|--------------|--------------|--------------|----|--------------|--------------|--------------|
| 1 | 38.842157000 | 42.763666000 | 37.125582000 | 1  | 45.373077000 | 44.176563000 | 41.132200000 |
| 1 | 38.704820000 | 42.042200000 | 39.490809000 | 1  | 42.532126000 | 45.260110000 | 40.738915000 |
| 6 | 45.989337000 | 53.512411000 | 38.170169000 | 1  | 43.669134000 | 45.850988000 | 41.925741000 |
| 6 | 44.697457000 | 54.287112000 | 37.899818000 | 7  | 43.557327000 | 41.858678000 | 41.793840000 |
| 8 | 44.292717000 | 55.144079000 | 38.680143000 | 6  | 43.014262000 | 40.931423000 | 42.776877000 |
| 6 | 45.801203000 | 52.409525000 | 39.225220000 | 6  | 43.302092000 | 39.465374000 | 42.433472000 |
| 6 | 45.086771000 | 51.164711000 | 38.684755000 | 6  | 42.884025000 | 38.540488000 | 43.572138000 |
| 7 | 45.065722000 | 50.108064000 | 39.499936000 | 8  | 42.575070000 | 39.063365000 | 41.264283000 |
| 8 | 44.566304000 | 51.163026000 | 37.550468000 | 1  | 43.752864000 | 41.521860000 | 40.853509000 |
| 1 | 46.398170000 | 53.080114000 | 37.251538000 | 1  | 41.925138000 | 41.057382000 | 42.865579000 |
| 1 | 46.775886000 | 52.106766000 | 39.627735000 | 1  | 44.379960000 | 39.345197000 | 42.249575000 |
| 1 | 45.228154000 | 52.809654000 | 40.071851000 | 1  | 43.039935000 | 39.430929000 | 40.476675000 |
| 1 | 45.445775000 | 50.115518000 | 40.444966000 | 1  | 41.812463000 | 38.648180000 | 43.779287000 |
| 1 | 44.558075000 | 49.244411000 | 39.278238000 | 1  | 43.082631000 | 37.500135000 | 43.298829000 |
| 7 | 44.053097000 | 53.960094000 | 36.735977000 | 1  | 43.442460000 | 38.768511000 | 44.486336000 |
| 6 | 42.724720000 | 54.455847000 | 36.426483000 | 6  | 38.965161000 | 33.123525000 | 42.298322000 |
| 6 | 41.556376000 | 53.460950000 | 36.573218000 | 6  | 37.661727000 | 33.239125000 | 41.498396000 |
| 8 | 40.438124000 | 53.794757000 | 36.185733000 | 8  | 36.611674000 | 32.755405000 | 41.923728000 |
| 1 | 44.363809000 | 53.105645000 | 36.289821000 | 6  | 39.962483000 | 34.286274000 | 42.199678000 |
| 1 | 42.534700000 | 55.294927000 | 37.100889000 | 6  | 41.115248000 | 34.122059000 | 43.194665000 |
| 7 | 41.858441000 | 52.270319000 | 37.144703000 | 8  | 40.451364000 | 34.326830000 | 40.862177000 |
| 6 | 40.897166000 | 51.191453000 | 37.312513000 | 1  | 38.669051000 | 32.969191000 | 43.340257000 |
| 6 | 41.323343000 | 49.931131000 | 36.528720000 | 1  | 39.430033000 | 35.225358000 | 42.433072000 |
| 6 | 40.446296000 | 48.735541000 | 36.830016000 | 1  | 41.071050000 | 35.096514000 | 40.783583000 |
| 6 | 39.222125000 | 48.557109000 | 36.169583000 | 1  | 41.637411000 | 33.173020000 | 43.023946000 |
| 6 | 40.827177000 | 47.794688000 | 37.798685000 | 1  | 41.838929000 | 34.932746000 | 43.064578000 |
| 6 | 38.399743000 | 47.467939000 | 36.463645000 | 1  | 40.752521000 | 34.142254000 | 44.230270000 |
| 6 | 40.005950000 | 46.703217000 | 38.091985000 | 7  | 37.775715000 | 33.869009000 | 40.296407000 |
| 6 | 38.788983000 | 46.534820000 | 37.426890000 | 6  | 36.668582000 | 34.007055000 | 39.366748000 |
| 1 | 42.824968000 | 52.053323000 | 37.376799000 | 6  | 36.271924000 | 35.466849000 | 39.057537000 |
| 1 | 39.927902000 | 51.563442000 | 36.972247000 | 6  | 35.796279000 | 36.200065000 | 40.325891000 |
| 1 | 41.299619000 | 50.164652000 | 35.456643000 | 6  | 35.214681000 | 35.476030000 | 37.941865000 |
| 1 | 42.365066000 | 49.704521000 | 36.783333000 | 6  | 35.650087000 | 37.718808000 | 40.168435000 |
| 1 | 38.915957000 | 49.276724000 | 35.412557000 | 1  | 38.708810000 | 34.200218000 | 40.050929000 |
| 1 | 41.772961000 | 47.912103000 | 38.324179000 | 1  | 35.824162000 | 33.470052000 | 39.810173000 |
| 1 | 37.457646000 | 47.345064000 | 35.934044000 | 1  | 37.164852000 | 35.984443000 | 38.674789000 |
| 1 | 40.320886000 | 45.979335000 | 38.839641000 | 1  | 34.838222000 | 35.765410000 | 40.648877000 |
| 1 | 38.157002000 | 45.679723000 | 37.651237000 | 1  | 36.509482000 | 35.994326000 | 41.133418000 |
| 6 | 46.820611000 | 50.351680000 | 32.504177000 | 1  | 34.952301000 | 36.491886000 | 37.631914000 |
| 6 | 48.205843000 | 49.714979000 | 32.559406000 | 1  | 35.579854000 | 34.947639000 | 37.052209000 |
| 7 | 48.245929000 | 48.500947000 | 33.169499000 | 1  | 34.294660000 | 34.975264000 | 38.274537000 |
| 8 | 49.196091000 | 50.266818000 | 32.085459000 | 1  | 35.336492000 | 38.179976000 | 41.113178000 |
| 1 | 46.058788000 | 49.763785000 | 33.023090000 | 1  | 36.605015000 | 38.177767000 | 39.882142000 |
| 1 | 46.529830000 | 50.469215000 | 31.454630000 | 1  | 34.913755000 | 37.994815000 | 39.406044000 |
| 1 | 49.134840000 | 48.020881000 | 33.190563000 | 6  | 50.314192000 | 32.133239000 | 42.768921000 |
| 1 | 47.411777000 | 48.037152000 | 33.538381000 | 6  | 48.894016000 | 32.678302000 | 42.608148000 |
| 6 | 49.253129000 | 38.869761000 | 34.752481000 | 16 | 48.866090000 | 34.477839000 | 42.288895000 |
| 6 | 47.789695000 | 38.523559000 | 35.033420000 | 1  | 50.907841000 | 32.312594000 | 41.866198000 |
| 8 | 47.400015000 | 38.329030000 | 36.204479000 | 1  | 48.388575000 | 32.187907000 | 41.766651000 |
| 6 | 49.517221000 | 39.841190000 | 33.585637000 | 1  | 48.289638000 | 32.470891000 | 43.498734000 |
| 6 | 48.886979000 | 41.243256000 | 33.728113000 | 6  | 40.360070000 | 47.243862000 | 42.450564000 |
| 6 | 49.529141000 | 42.054248000 | 34.863849000 | 6  | 41.200321000 | 48.336524000 | 43.103627000 |
| 6 | 48.958039000 | 41.997834000 | 32.393205000 | 8  | 40.862771000 | 48.853681000 | 44.173049000 |
| 1 | 49.657004000 | 39.259596000 | 35.691626000 | 6  | 40.463103000 | 45.862525000 | 43.138084000 |
| 1 | 50.606679000 | 39.949701000 | 33.476160000 | 6  | 40.125487000 | 45.793625000 | 44.640681000 |
| 1 | 49.168953000 | 39.394437000 | 32.645930000 | 6  | 38.723206000 | 46.329337000 | 44.963418000 |
| 1 | 47.821063000 | 41.115293000 | 33.958925000 | 6  | 40.298269000 | 44.346230000 | 45.129985000 |
| 1 | 49.439008000 | 41.555675000 | 35.836540000 | 1  | 39.322876000 | 47.596229000 | 42.477868000 |
| 1 | 50.598666000 | 42.219301000 | 34.670823000 | 1  | 39.789400000 | 45.180473000 | 42.596565000 |
| 1 | 49.053002000 | 43.037291000 | 34.954529000 | 1  | 41.473831000 | 45.462047000 | 43.000108000 |
| 1 | 50.000703000 | 42.142819000 | 32.074430000 | 1  | 40.847069000 | 46.424649000 | 45.174964000 |
| 1 | 48.418160000 | 41.443267000 | 31.619595000 | 1  | 38.656719000 | 47.399784000 | 44.747739000 |
| 1 | 48.481795000 | 42.979988000 | 32.479620000 | 1  | 37.953068000 | 45.802626000 | 44.381292000 |
| 7 | 46.985627000 | 38.398445000 | 33.967202000 | 1  | 38.487380000 | 46.186713000 | 46.026350000 |
| 6 | 45.541371000 | 38.204877000 | 34.073237000 | 1  | 41.285246000 | 43.951119000 | 44.862847000 |
| 6 | 44.904162000 | 38.294581000 | 32.673605000 | 1  | 40.179862000 | 44.280215000 | 46.219526000 |
| 6 | 45.350363000 | 39.587863000 | 31.948215000 | 1  | 39.542453000 | 43.688887000 | 44.676828000 |
| 8 | 46.544960000 | 39.612936000 | 31.561082000 | 7  | 42.327441000 | 48.702367000 | 42.427850000 |
| 8 | 44.501274000 | 40.528367000 | 31.847474000 | 6  | 43.206057000 | 49.748264000 | 42.923794000 |
| 1 | 47.271333000 | 38.750795000 | 33.045440000 | 6  | 44.629355000 | 49.272304000 | 43.266686000 |
| 1 | 45.112658000 | 38.970547000 | 34.732726000 | 6  | 44.658519000 | 48.130411000 | 44.284632000 |
| 1 | 45.225508000 | 37.432958000 | 32.075679000 | 8  | 45.382291000 | 48.941368000 | 42.096258000 |
| 1 | 43.815350000 | 38.254136000 | 32.777992000 | 1  | 42.595178000 | 48.237240000 | 41.557042000 |
| 6 | 45.837106000 | 41.062531000 | 37.854892000 | 1  | 42.724807000 | 50.157869000 | 43.815799000 |
| 6 | 44.925404000 | 40.007349000 | 38.445212000 | 1  | 45.152357000 | 50.138846000 | 43.695150000 |
| 8 | 44.126338000 | 40.302086000 | 39.360438000 | 1  | 44.859402000 | 48.317903000 | 41.537791000 |
| 1 | 46.266523000 | 41.659206000 | 38.664245000 | 1  | 45.695221000 | 47.867973000 | 44.519810000 |
| 1 | 45.238370000 | 41.732741000 | 37.227841000 | 1  | 44.145435000 | 48.416923000 | 45.210437000 |
| 7 | 44.999304000 | 38.779996000 | 37.908250000 | 1  | 44.163088000 | 47.236754000 | 43.891151000 |
| 6 | 44.171828000 | 37.668308000 | 38.372875000 | 8  | 44.948448000 | 35.755861000 | 41.497159000 |
| 6 | 43.977063000 | 36.615059000 | 37.287665000 | 26 | 46.441657000 | 35.222579000 | 41.891253000 |
| 1 | 45.742524000 | 38.586514000 | 37.234220000 | 7  | 45.744974000 | 33.530132000 | 42.746940000 |
| 1 | 43.204551000 | 38.073911000 | 38.670102000 | 7  | 46.441380000 | 36.130099000 | 43.693841000 |
| 1 | 44.934038000 | 36.192201000 | 36.961641000 | 7  | 46.678562000 | 34.230605000 | 40.143084000 |
| 1 | 43.362965000 | 35.801786000 | 37.687515000 | 6  | 45.709536000 | 32.067583000 | 40.777092000 |
| 1 | 43.467981000 | 37.041597000 | 36.416236000 | 6  | 45.411249000 | 34.354108000 | 45.034280000 |
| 6 | 44.298029000 | 44.033591000 | 40.957460000 | 6  | 47.421102000 | 38.287088000 | 43.056002000 |
| 6 | 43.745365000 | 43.169567000 | 42.092549000 | 6  | 47.583875000 | 36.053294000 | 38.767419000 |
| 8 | 43.498161000 | 43.639212000 | 43.208657000 | 6  | 45.449872000 | 32.351710000 | 42.113595000 |
| 6 | 43.606097000 | 45.398400000 | 40.933047000 | 6  | 45.936364000 | 35.628698000 | 44.863794000 |
| 6 | 44.118761000 | 46.396838000 | 39.885342000 | 6  | 47.641228000 | 38.016145000 | 41.713586000 |
| 8 | 43.841282000 | 47.630409000 | 40.121996000 | 6  | 47.121496000 | 34.758443000 | 38.954573000 |
| 8 | 44.726595000 | 45.961492000 | 38.884923000 | 6  | 44.834105000 | 31.430319000 | 43.037053000 |

|   |              |              |              |   |              |              |              |
|---|--------------|--------------|--------------|---|--------------|--------------|--------------|
| 6 | 46.034461000 | 36.616483000 | 45.912241000 | 1 | 40.228415000 | 45.822945000 | 31.884186000 |
| 6 | 48.169760000 | 38.968285000 | 40.762911000 | 1 | 41.869216000 | 45.215934000 | 31.645714000 |
| 6 | 47.020760000 | 33.771375000 | 37.906126000 | 1 | 41.417407000 | 45.965415000 | 33.188209000 |
| 6 | 44.752185000 | 32.072979000 | 44.235678000 | 1 | 38.923302000 | 47.670559000 | 32.282377000 |
| 6 | 46.606638000 | 37.720293000 | 45.357018000 | 1 | 38.934950000 | 49.437496000 | 32.264793000 |
| 6 | 48.195112000 | 38.345167000 | 39.554324000 | 1 | 39.261055000 | 48.535964000 | 30.774352000 |
| 6 | 46.501747000 | 32.647364000 | 38.471104000 | 7 | 45.104265000 | 46.028388000 | 31.574697000 |
| 6 | 45.318028000 | 33.386100000 | 44.042686000 | 6 | 46.038196000 | 45.172114000 | 30.854331000 |
| 6 | 46.853441000 | 37.404774000 | 43.969702000 | 6 | 45.583663000 | 43.721695000 | 30.693929000 |
| 6 | 47.696389000 | 37.006432000 | 39.770650000 | 8 | 45.600114000 | 43.070487000 | 31.948545000 |
| 6 | 46.277143000 | 32.947519000 | 39.865468000 | 1 | 45.300315000 | 46.269237000 | 32.544037000 |
| 7 | 47.368873000 | 36.824909000 | 41.089296000 | 1 | 46.993075000 | 45.191154000 | 31.390520000 |
| 1 | 45.424416000 | 31.085584000 | 40.411448000 | 1 | 44.581857000 | 43.715006000 | 30.238247000 |
| 1 | 45.036504000 | 34.096135000 | 46.020326000 | 1 | 46.272032000 | 43.229653000 | 29.985386000 |
| 1 | 47.690853000 | 39.274781000 | 43.417152000 | 1 | 45.309109000 | 42.132655000 | 31.812788000 |
| 1 | 47.858629000 | 36.361806000 | 37.763766000 | 6 | 36.149580000 | 39.144049000 | 34.914470000 |
| 6 | 43.471421000 | 42.641622000 | 34.266162000 | 6 | 35.075870000 | 39.725741000 | 35.820831000 |
| 6 | 42.340282000 | 41.919722000 | 36.081696000 | 8 | 34.795266000 | 39.190740000 | 36.898473000 |
| 6 | 41.731016000 | 41.674678000 | 37.314830000 | 6 | 37.472216000 | 38.976313000 | 35.691866000 |
| 6 | 41.666713000 | 39.687551000 | 35.288986000 | 8 | 37.354539000 | 38.044713000 | 36.751061000 |
| 6 | 42.304812000 | 40.908722000 | 35.072330000 | 1 | 35.813541000 | 38.154629000 | 34.581935000 |
| 6 | 43.097233000 | 43.027474000 | 35.541663000 | 1 | 38.243329000 | 38.595913000 | 35.014823000 |
| 6 | 41.101378000 | 40.436474000 | 37.537633000 | 1 | 37.810489000 | 39.958130000 | 36.055432000 |
| 6 | 41.063021000 | 39.452666000 | 36.528718000 | 1 | 36.543110000 | 38.290786000 | 37.236695000 |
| 7 | 42.991127000 | 41.391140000 | 33.978292000 | 7 | 34.457325000 | 40.859672000 | 35.383346000 |
| 6 | 43.456012000 | 44.314529000 | 36.228203000 | 6 | 33.561318000 | 41.644475000 | 36.221570000 |
| 6 | 44.370121000 | 45.181074000 | 35.356779000 | 6 | 34.193966000 | 42.965505000 | 36.715439000 |
| 7 | 44.897996000 | 46.319781000 | 36.097128000 | 6 | 35.455191000 | 42.759377000 | 37.526259000 |
| 6 | 45.644585000 | 47.251377000 | 35.493813000 | 6 | 35.384775000 | 42.357994000 | 38.867410000 |
| 8 | 45.852187000 | 47.249938000 | 34.256157000 | 6 | 36.719163000 | 42.909004000 | 36.940536000 |
| 6 | 46.218263000 | 48.331663000 | 36.387290000 | 6 | 36.544322000 | 42.096401000 | 39.597396000 |
| 8 | 40.553458000 | 40.279453000 | 38.777142000 | 6 | 37.884228000 | 42.644724000 | 37.666223000 |
| 6 | 39.974922000 | 39.022248000 | 39.119732000 | 6 | 37.798887000 | 42.231880000 | 38.997772000 |
| 1 | 44.082095000 | 43.147168000 | 33.526497000 | 1 | 34.813796000 | 41.290872000 | 34.541539000 |
| 1 | 41.759662000 | 42.395385000 | 38.126110000 | 1 | 33.302269000 | 41.004312000 | 37.067414000 |
| 1 | 47.228026000 | 48.578950000 | 36.046717000 | 1 | 34.407058000 | 43.606666000 | 35.849010000 |
| 1 | 40.713227000 | 38.213607000 | 39.058816000 | 1 | 33.433703000 | 43.490489000 | 37.309430000 |
| 1 | 39.116326000 | 38.785687000 | 38.479474000 | 1 | 34.412073000 | 42.240100000 | 39.341279000 |
| 1 | 39.655528000 | 39.123282000 | 40.157703000 | 1 | 36.795476000 | 43.236818000 | 35.905384000 |
| 1 | 41.636914000 | 38.925187000 | 34.514597000 | 1 | 36.469113000 | 41.782145000 | 40.635055000 |
| 1 | 40.565069000 | 38.507206000 | 36.706534000 | 1 | 38.856344000 | 42.755129000 | 37.194090000 |
| 1 | 42.552660000 | 44.885829000 | 36.489845000 | 1 | 38.705253000 | 42.006546000 | 39.550399000 |
| 1 | 43.957772000 | 44.113293000 | 37.185072000 | 6 | 45.968122000 | 53.514542000 | 38.168401000 |
| 1 | 43.824503000 | 45.540587000 | 34.477580000 | 6 | 44.676197000 | 54.286261000 | 37.889983000 |
| 1 | 45.206021000 | 44.579799000 | 34.975708000 | 8 | 44.266399000 | 55.144830000 | 38.665898000 |
| 1 | 46.242704000 | 48.020716000 | 37.435053000 | 6 | 45.776045000 | 52.410448000 | 39.221539000 |
| 1 | 45.607540000 | 49.239290000 | 36.318356000 | 6 | 45.069564000 | 51.163185000 | 38.676016000 |
| 1 | 43.325292000 | 40.880119000 | 33.142529000 | 7 | 45.045558000 | 50.107267000 | 39.492081000 |
| 1 | 44.817264000 | 46.321415000 | 37.124557000 | 8 | 44.558476000 | 51.158757000 | 37.537433000 |
| 8 | 42.278586000 | 36.340423000 | 40.701931000 | 1 | 46.383928000 | 53.083743000 | 37.252185000 |
| 1 | 43.178797000 | 36.021099000 | 40.914714000 | 1 | 46.749014000 | 52.110523000 | 39.630271000 |
| 1 | 42.289553000 | 37.290768000 | 40.962880000 | 1 | 45.196315000 | 52.808191000 | 40.064732000 |
| 1 | 50.828996000 | 32.612217000 | 43.609214000 | 1 | 45.415818000 | 50.117955000 | 40.441059000 |
| 1 | 50.291078000 | 31.051170000 | 42.957261000 | 1 | 44.544231000 | 49.241093000 | 39.266707000 |
| 1 | 48.486420000 | 38.725303000 | 38.584156000 | 7 | 44.037608000 | 53.954442000 | 36.724349000 |
| 1 | 48.459103000 | 39.982641000 | 41.007191000 | 6 | 42.709338000 | 54.446067000 | 36.408099000 |
| 1 | 46.841975000 | 38.668415000 | 45.823882000 | 1 | 41.542379000 | 53.449934000 | 36.557258000 |
| 1 | 45.701870000 | 36.468078000 | 46.932012000 | 8 | 40.423775000 | 53.780711000 | 36.168283000 |
| 1 | 44.342933000 | 31.709975000 | 45.170204000 | 1 | 44.352591000 | 53.099607000 | 36.281835000 |
| 1 | 44.506524000 | 30.430005000 | 42.782790000 | 1 | 42.515613000 | 55.288528000 | 37.077189000 |
| 1 | 46.271816000 | 31.699047000 | 38.001546000 | 7 | 41.845976000 | 52.261646000 | 37.132973000 |
| 1 | 47.310724000 | 33.940300000 | 36.876870000 | 6 | 40.886526000 | 51.181558000 | 37.302668000 |
| 1 | 43.446925000 | 41.184859000 | 43.750780000 | 6 | 41.309380000 | 49.923442000 | 36.513509000 |
| 1 | 44.205094000 | 43.530139000 | 39.990298000 | 6 | 40.434846000 | 48.726640000 | 36.817378000 |
| 1 | 43.283500000 | 50.548134000 | 42.174386000 | 6 | 39.200668000 | 48.555902000 | 36.173593000 |
| 1 | 40.630774000 | 47.132228000 | 41.393558000 | 6 | 40.827469000 | 47.778064000 | 37.773710000 |
| 1 | 36.299192000 | 39.711544000 | 34.010540000 | 6 | 38.379573000 | 47.467197000 | 36.472775000 |
| 1 | 32.623934000 | 41.816441000 | 35.637026000 | 6 | 40.007855000 | 46.686597000 | 38.071501000 |
| 1 | 36.925828000 | 33.502420000 | 38.423502000 | 6 | 38.780505000 | 46.526466000 | 37.423769000 |
| 1 | 39.481709000 | 32.210092000 | 41.969044000 | 1 | 42.813174000 | 52.045964000 | 37.363275000 |
| 1 | 46.186753000 | 45.608309000 | 29.858605000 | 1 | 39.915286000 | 51.553622000 | 36.968216000 |
| 1 | 43.482525000 | 48.614406000 | 31.439614000 | 1 | 41.279550000 | 50.159560000 | 35.442130000 |
| 1 | 46.873435000 | 51.353753000 | 32.941995000 | 1 | 42.352680000 | 49.696992000 | 36.761785000 |
| 1 | 40.807654000 | 50.943555000 | 38.378392000 | 1 | 38.885119000 | 49.281669000 | 35.426370000 |
| 1 | 42.682255000 | 54.837615000 | 35.400204000 | 1 | 41.780278000 | 47.890479000 | 38.287432000 |
| 1 | 46.707357000 | 54.244021000 | 38.553887000 | 1 | 37.428078000 | 47.351150000 | 35.958585000 |
| 1 | 44.619412000 | 37.214919000 | 39.264947000 | 1 | 40.331603000 | 45.956969000 | 38.809727000 |
| 1 | 46.635462000 | 40.631072000 | 37.246355000 | 1 | 38.148390000 | 45.672909000 | 37.653478000 |
| 1 | 45.330229000 | 37.232845000 | 34.534406000 | 6 | 46.829321000 | 50.349786000 | 32.518655000 |
| 1 | 49.779659000 | 37.922928000 | 34.562510000 | 6 | 48.213888000 | 49.711565000 | 32.572624000 |
|   |              |              |              | 7 | 48.253298000 | 48.497261000 | 33.182308000 |
|   |              |              |              | 8 | 49.204473000 | 50.262995000 | 32.098945000 |
|   |              |              |              | 1 | 46.066243000 | 49.760277000 | 33.033868000 |
|   |              |              |              | 1 | 46.540072000 | 50.472675000 | 31.469320000 |
|   |              |              |              | 1 | 49.141294000 | 48.015332000 | 33.199990000 |
|   |              |              |              | 1 | 47.418221000 | 48.031370000 | 33.546425000 |
|   |              |              |              | 6 | 49.263824000 | 38.873543000 | 34.748853000 |
|   |              |              |              | 6 | 47.801289000 | 38.525061000 | 35.031528000 |
|   |              |              |              | 8 | 47.412764000 | 38.332501000 | 36.203255000 |
|   |              |              |              | 6 | 49.525418000 | 39.842648000 | 33.579521000 |
|   |              |              |              | 6 | 46.892813000 | 41.243946000 | 33.718854000 |
|   |              |              |              | 6 | 49.533766000 | 42.058753000 | 34.852510000 |
|   |              |              |              | 6 | 48.962364000 | 41.995359000 | 32.382062000 |

#### 4ReaII

|   |              |              |              |
|---|--------------|--------------|--------------|
| 6 | 43.238751000 | 47.603469000 | 31.770121000 |
| 6 | 44.077896000 | 46.640807000 | 30.927934000 |
| 8 | 43.832481000 | 46.455577000 | 29.732892000 |
| 6 | 41.726389000 | 47.392216000 | 31.561094000 |
| 6 | 40.927526000 | 48.553427000 | 32.184747000 |
| 6 | 41.284193000 | 46.022591000 | 32.099664000 |
| 6 | 39.428554000 | 48.545834000 | 31.859355000 |
| 1 | 43.503010000 | 47.532220000 | 32.832000000 |
| 1 | 41.561299000 | 47.401238000 | 30.474853000 |
| 1 | 41.060290000 | 48.540315000 | 33.276586000 |
| 1 | 41.357929000 | 49.502897000 | 31.835465000 |

|    |              |              |              |    |              |              |              |
|----|--------------|--------------|--------------|----|--------------|--------------|--------------|
| 1  | 49.667461000 | 39.266397000 | 35.686834000 | 6  | 40.457482000 | 45.833657000 | 43.099759000 |
| 1  | 50.614617000 | 39.952813000 | 33.469148000 | 6  | 40.098198000 | 45.765091000 | 44.597287000 |
| 1  | 49.177419000 | 39.393000000 | 32.641098000 | 6  | 38.680170000 | 46.272975000 | 44.894930000 |
| 1  | 47.827145000 | 41.114802000 | 33.950115000 | 6  | 40.294098000 | 44.323954000 | 45.096079000 |
| 1  | 49.444461000 | 41.562424000 | 35.826420000 | 1  | 39.296611000 | 47.545678000 | 42.418476000 |
| 1  | 50.603019000 | 42.225039000 | 34.659041000 | 1  | 39.805091000 | 45.136419000 | 42.551568000 |
| 1  | 49.056050000 | 43.041248000 | 34.940778000 | 1  | 41.477558000 | 45.451757000 | 42.978775000 |
| 1  | 50.004740000 | 42.142025000 | 32.063123000 | 1  | 40.797771000 | 46.413798000 | 45.139604000 |
| 1  | 48.424036000 | 41.437389000 | 31.609792000 | 1  | 38.595098000 | 47.340879000 | 44.673032000 |
| 1  | 48.483627000 | 42.976489000 | 32.465956000 | 1  | 37.930403000 | 45.728089000 | 44.303073000 |
| 7  | 46.996645000 | 38.395793000 | 33.966176000 | 1  | 38.430198000 | 46.130428000 | 45.954617000 |
| 6  | 45.552852000 | 38.199631000 | 34.074070000 | 1  | 41.296944000 | 43.952776000 | 44.854887000 |
| 6  | 44.913934000 | 38.286266000 | 32.675027000 | 1  | 40.150136000 | 44.258084000 | 46.182573000 |
| 6  | 45.357004000 | 39.579577000 | 31.947855000 | 1  | 39.567338000 | 43.646207000 | 44.625768000 |
| 8  | 46.550554000 | 39.605819000 | 31.557883000 | 7  | 42.286214000 | 48.694473000 | 42.395694000 |
| 8  | 44.506641000 | 40.519275000 | 31.849139000 | 6  | 43.147775000 | 49.752161000 | 42.896379000 |
| 1  | 47.281029000 | 38.746694000 | 33.043548000 | 6  | 44.571863000 | 49.292113000 | 43.257377000 |
| 1  | 45.123537000 | 38.965320000 | 34.733142000 | 6  | 44.601292000 | 48.158217000 | 44.284118000 |
| 1  | 45.236322000 | 37.424526000 | 32.077861000 | 8  | 45.339311000 | 48.958680000 | 42.097064000 |
| 1  | 43.825307000 | 38.243847000 | 32.780651000 | 1  | 42.569342000 | 48.227019000 | 41.531086000 |
| 6  | 45.857610000 | 41.062461000 | 37.859391000 | 1  | 42.652189000 | 50.161167000 | 43.780796000 |
| 6  | 44.942189000 | 40.009797000 | 38.448525000 | 1  | 45.082998000 | 50.166444000 | 43.684313000 |
| 8  | 44.143127000 | 40.306582000 | 39.363068000 | 1  | 44.827468000 | 48.326856000 | 41.537595000 |
| 1  | 46.291129000 | 41.655065000 | 38.669553000 | 1  | 45.638277000 | 47.901559000 | 44.524259000 |
| 1  | 45.260891000 | 41.736984000 | 37.235129000 | 1  | 44.084726000 | 48.450471000 | 45.206206000 |
| 7  | 45.013195000 | 38.782272000 | 37.911471000 | 1  | 44.109242000 | 47.260063000 | 43.896824000 |
| 6  | 44.183043000 | 37.672641000 | 38.376087000 | 8  | 44.948370000 | 35.762396000 | 41.503245000 |
| 6  | 43.988784000 | 36.618166000 | 37.292087000 | 26 | 46.443458000 | 35.216629000 | 41.876610000 |
| 1  | 45.755880000 | 38.587203000 | 37.237334000 | 7  | 45.739405000 | 33.523981000 | 42.727831000 |
| 1  | 43.215806000 | 38.080014000 | 38.670922000 | 7  | 46.446055000 | 36.118862000 | 43.685218000 |
| 1  | 44.945555000 | 36.192268000 | 36.969474000 | 7  | 46.677252000 | 34.231457000 | 40.129051000 |
| 1  | 43.371883000 | 35.806873000 | 37.691647000 | 6  | 45.700631000 | 32.068407000 | 40.754201000 |
| 1  | 43.482898000 | 37.044378000 | 36.418656000 | 6  | 45.410159000 | 34.341278000 | 45.018661000 |
| 6  | 44.327598000 | 44.033794000 | 40.972369000 | 6  | 47.430608000 | 38.275038000 | 43.054027000 |
| 6  | 43.774024000 | 43.167411000 | 42.105130000 | 6  | 47.593349000 | 36.053628000 | 38.759194000 |
| 8  | 43.524414000 | 43.635072000 | 43.221477000 | 6  | 45.439269000 | 32.349019000 | 42.091105000 |
| 6  | 43.627616000 | 45.394418000 | 40.944062000 | 6  | 45.937890000 | 35.615408000 | 44.852600000 |
| 6  | 44.126101000 | 46.389162000 | 39.886101000 | 6  | 47.651662000 | 38.007258000 | 41.711285000 |
| 8  | 43.836950000 | 47.621763000 | 40.113274000 | 6  | 47.127872000 | 34.759648000 | 38.943066000 |
| 8  | 44.733623000 | 45.951389000 | 38.886473000 | 6  | 44.819602000 | 31.427120000 | 43.011463000 |
| 1  | 45.401018000 | 44.182898000 | 41.151763000 | 6  | 46.034975000 | 36.600662000 | 45.903803000 |
| 1  | 42.553401000 | 45.248196000 | 40.757760000 | 6  | 48.185606000 | 38.960524000 | 40.764723000 |
| 1  | 43.693877000 | 45.853737000 | 41.933489000 | 6  | 47.029975000 | 33.774205000 | 37.893124000 |
| 7  | 43.587092000 | 41.856913000 | 41.803863000 | 6  | 44.741570000 | 32.065926000 | 44.212387000 |
| 6  | 43.040011000 | 40.928295000 | 42.783527000 | 6  | 46.609596000 | 37.705021000 | 45.352314000 |
| 6  | 43.318570000 | 39.462086000 | 42.433558000 | 6  | 48.210789000 | 38.341550000 | 39.554021000 |
| 6  | 42.898305000 | 38.535586000 | 43.570174000 | 6  | 46.505772000 | 32.650600000 | 38.454067000 |
| 8  | 42.585978000 | 39.068499000 | 41.264998000 | 6  | 45.313068000 | 33.377325000 | 44.023614000 |
| 1  | 43.782225000 | 41.522235000 | 40.862685000 | 6  | 46.858987000 | 37.392019000 | 43.964696000 |
| 1  | 41.951900000 | 41.060777000 | 42.874533000 | 6  | 47.706719000 | 37.004024000 | 39.765049000 |
| 1  | 44.395232000 | 39.336324000 | 42.246339000 | 6  | 46.275044000 | 32.948969000 | 39.847622000 |
| 1  | 43.050389000 | 39.436788000 | 40.477562000 | 7  | 47.375331000 | 36.819235000 | 41.081951000 |
| 1  | 41.827663000 | 38.647750000 | 43.779750000 | 1  | 45.413514000 | 31.088556000 | 40.384411000 |
| 1  | 43.091691000 | 37.495233000 | 43.293366000 | 1  | 45.034472000 | 34.080888000 | 46.003728000 |
| 1  | 43.459648000 | 38.758144000 | 44.483920000 | 1  | 47.702722000 | 39.261013000 | 43.418120000 |
| 6  | 38.954757000 | 33.153466000 | 42.319521000 | 1  | 47.871392000 | 36.363239000 | 37.756822000 |
| 6  | 37.648983000 | 33.274097000 | 41.524216000 | 6  | 43.478735000 | 42.628797000 | 34.269680000 |
| 8  | 36.597983000 | 32.797227000 | 41.954853000 | 6  | 42.349584000 | 41.904447000 | 36.085563000 |
| 6  | 39.958785000 | 34.309800000 | 42.213469000 | 6  | 41.740781000 | 41.657956000 | 37.318501000 |
| 6  | 41.114423000 | 34.141150000 | 43.204375000 | 6  | 41.676859000 | 39.672448000 | 35.291003000 |
| 8  | 40.442640000 | 34.343450000 | 40.873964000 | 6  | 42.314218000 | 40.894285000 | 35.075313000 |
| 1  | 38.661746000 | 33.004156000 | 43.363058000 | 6  | 43.105263000 | 43.013387000 | 35.545724000 |
| 1  | 39.433115000 | 35.252844000 | 42.446272000 | 6  | 41.111264000 | 40.419168000 | 37.540165000 |
| 1  | 41.066921000 | 35.108957000 | 40.790707000 | 6  | 41.073422000 | 39.436109000 | 36.530506000 |
| 1  | 41.630038000 | 33.188460000 | 43.034135000 | 7  | 42.999377000 | 41.377999000 | 33.981348000 |
| 1  | 41.842616000 | 34.946980000 | 43.069416000 | 6  | 43.462895000 | 44.300798000 | 36.232129000 |
| 1  | 40.755922000 | 34.166378000 | 44.241332000 | 6  | 44.374510000 | 45.169402000 | 35.359941000 |
| 7  | 37.761714000 | 33.899966000 | 40.319951000 | 7  | 44.900367000 | 46.309065000 | 36.100261000 |
| 6  | 36.652138000 | 34.038737000 | 39.393316000 | 6  | 45.648961000 | 47.239723000 | 35.497844000 |
| 6  | 36.261881000 | 35.498669000 | 39.076645000 | 8  | 45.859828000 | 47.236846000 | 34.260766000 |
| 6  | 35.797595000 | 36.242979000 | 40.342649000 | 6  | 46.220365000 | 48.320962000 | 36.391665000 |
| 6  | 35.198449000 | 35.505476000 | 37.966800000 | 8  | 40.563217000 | 40.261145000 | 38.779229000 |
| 6  | 35.654656000 | 37.760998000 | 40.175289000 | 6  | 39.982473000 | 39.004413000 | 39.120315000 |
| 1  | 38.695852000 | 34.224341000 | 40.069399000 | 1  | 44.088222000 | 43.135548000 | 33.529866000 |
| 1  | 35.806410000 | 33.508986000 | 39.842928000 | 1  | 41.769428000 | 42.377613000 | 38.130690000 |
| 1  | 37.155510000 | 36.008693000 | 38.685330000 | 1  | 47.230681000 | 48.568520000 | 36.052997000 |
| 1  | 34.840577000 | 35.813767000 | 40.675901000 | 1  | 40.719699000 | 38.194694000 | 39.060501000 |
| 1  | 36.516004000 | 36.040785000 | 41.146459000 | 1  | 39.124453000 | 38.769526000 | 38.478687000 |
| 1  | 34.938691000 | 36.520309000 | 37.651330000 | 1  | 39.661380000 | 39.105687000 | 40.157736000 |
| 1  | 35.556156000 | 34.969377000 | 37.078721000 | 1  | 41.647449000 | 38.910793000 | 34.515917000 |
| 1  | 34.278042000 | 35.011198000 | 38.307952000 | 1  | 40.576438000 | 38.490058000 | 36.707827000 |
| 1  | 35.349947000 | 38.229445000 | 41.119371000 | 1  | 42.558741000 | 44.870452000 | 36.494707000 |
| 1  | 36.608182000 | 38.215732000 | 39.877960000 | 1  | 43.965908000 | 44.100345000 | 37.188539000 |
| 1  | 34.912784000 | 38.033619000 | 39.417076000 | 1  | 43.827364000 | 45.527780000 | 34.481181000 |
| 6  | 50.304299000 | 32.114085000 | 42.745948000 | 1  | 45.211429000 | 44.570030000 | 34.978126000 |
| 6  | 48.885632000 | 32.662731000 | 42.584154000 | 1  | 46.242749000 | 48.010757000 | 37.439698000 |
| 16 | 48.862023000 | 34.465412000 | 42.281889000 | 1  | 45.609225000 | 49.228196000 | 36.320603000 |
| 1  | 50.902164000 | 32.301077000 | 41.847550000 | 1  | 43.333273000 | 40.867947000 | 33.144589000 |
| 1  | 48.383496000 | 32.180675000 | 41.735888000 | 1  | 44.818732000 | 46.311032000 | 37.127724000 |
| 1  | 48.277302000 | 32.447684000 | 43.470210000 | 8  | 42.280282000 | 36.346707000 | 40.699947000 |
| 6  | 40.339396000 | 47.209568000 | 42.404067000 | 1  | 43.178753000 | 36.024408000 | 40.915772000 |
| 6  | 41.156378000 | 48.317511000 | 43.060789000 | 1  | 42.294111000 | 37.297063000 | 40.960886000 |
| 8  | 40.799864000 | 48.835139000 | 44.123743000 | 1  | 50.816068000 | 32.584515000 | 43.592905000 |



|   |              |              |              |
|---|--------------|--------------|--------------|
| 1 | 50.278917000 | 31.030297000 | 42.924031000 |
| 1 | 48.505543000 | 38.723781000 | 38.585734000 |
| 1 | 48.478695000 | 39.972804000 | 41.013135000 |
| 1 | 46.844900000 | 38.651914000 | 45.821692000 |
| 1 | 45.699669000 | 36.450409000 | 46.922416000 |
| 1 | 44.331631000 | 31.701384000 | 45.146020000 |
| 1 | 44.487477000 | 30.429150000 | 42.753903000 |
| 1 | 46.275921000 | 31.703446000 | 37.982132000 |
| 1 | 47.325158000 | 33.943993000 | 36.865497000 |
| 1 | 43.475572000 | 41.174622000 | 43.758002000 |
| 1 | 44.241255000 | 43.529986000 | 40.004810000 |
| 1 | 43.225400000 | 50.549111000 | 42.143892000 |
| 1 | 40.623109000 | 47.097228000 | 41.350554000 |
| 1 | 36.315188000 | 39.764455000 | 34.024677000 |
| 1 | 32.641469000 | 41.861907000 | 35.662809000 |
| 1 | 36.903144000 | 33.527133000 | 38.452129000 |
| 1 | 39.464587000 | 32.235936000 | 41.991173000 |
| 1 | 46.187532000 | 45.598888000 | 29.856385000 |
| 1 | 43.506847000 | 48.619211000 | 31.445797000 |
| 1 | 46.882426000 | 51.349699000 | 32.961396000 |
| 1 | 40.802851000 | 50.930937000 | 38.368336000 |
| 1 | 42.669386000 | 54.821978000 | 35.379562000 |
| 1 | 46.681784000 | 54.247677000 | 38.557221000 |
| 1 | 44.628123000 | 37.219782000 | 39.269819000 |
| 1 | 46.653083000 | 40.628998000 | 37.248533000 |
| 1 | 45.344055000 | 37.227775000 | 34.536697000 |
| 1 | 49.792107000 | 37.927291000 | 34.560862000 |

## 2T51c6,II

|   |              |              |              |
|---|--------------|--------------|--------------|
| 6 | 42.168407000 | 41.265239000 | 32.135818000 |
| 6 | 42.989561000 | 41.091186000 | 30.862794000 |
| 8 | 42.670562000 | 41.623475000 | 29.794504000 |
| 6 | 40.663499000 | 41.005061000 | 31.914568000 |
| 6 | 39.861969000 | 41.480355000 | 33.142600000 |
| 6 | 40.405560000 | 39.530872000 | 31.568373000 |
| 6 | 38.339010000 | 41.434738000 | 32.967303000 |
| 1 | 42.549592000 | 40.618007000 | 32.937542000 |
| 1 | 40.359957000 | 41.616749000 | 31.055203000 |
| 1 | 40.147371000 | 40.877995000 | 34.019227000 |
| 1 | 40.161526000 | 42.511875000 | 33.367385000 |
| 1 | 39.349990000 | 39.345085000 | 31.341881000 |
| 1 | 40.987408000 | 39.224106000 | 30.691898000 |
| 1 | 40.687441000 | 38.876081000 | 32.405618000 |
| 1 | 37.967534000 | 40.412021000 | 32.831557000 |
| 1 | 37.833739000 | 41.853105000 | 33.845781000 |
| 1 | 38.027314000 | 42.020837000 | 32.093610000 |
| 7 | 44.095697000 | 40.307921000 | 30.970493000 |
| 6 | 45.076105000 | 40.188015000 | 29.898891000 |
| 6 | 46.202890000 | 39.263313000 | 30.347855000 |
| 8 | 46.778505000 | 39.808457000 | 31.513822000 |
| 1 | 44.431715000 | 40.058966000 | 31.892412000 |
| 1 | 45.484590000 | 41.175772000 | 29.645818000 |
| 1 | 45.798204000 | 38.254760000 | 30.534845000 |
| 1 | 46.936466000 | 39.176602000 | 29.528859000 |
| 1 | 47.233864000 | 39.094229000 | 32.040197000 |
| 6 | 41.630442000 | 42.707896000 | 40.413924000 |
| 6 | 41.521732000 | 43.378737000 | 41.779017000 |
| 8 | 40.538488000 | 43.147897000 | 42.518839000 |
| 6 | 41.023269000 | 41.299433000 | 40.440961000 |
| 8 | 39.640890000 | 41.331561000 | 40.831273000 |
| 1 | 41.092850000 | 43.329734000 | 39.685895000 |
| 1 | 41.074173000 | 40.842027000 | 39.449756000 |
| 1 | 41.594917000 | 40.662318000 | 41.130712000 |
| 1 | 39.632674000 | 42.011313000 | 41.552606000 |
| 7 | 42.510960000 | 44.217579000 | 42.130232000 |
| 6 | 42.476183000 | 44.990117000 | 43.368324000 |
| 6 | 43.668539000 | 44.696882000 | 44.302305000 |
| 6 | 43.661148000 | 43.308870000 | 44.909736000 |
| 6 | 42.768045000 | 42.991839000 | 45.944446000 |
| 6 | 44.538316000 | 42.312826000 | 44.457347000 |
| 6 | 42.745186000 | 41.718483000 | 46.513614000 |
| 6 | 44.520041000 | 41.037198000 | 45.030340000 |
| 6 | 43.625220000 | 40.733674000 | 46.057520000 |
| 1 | 43.189335000 | 44.505229000 | 41.422048000 |
| 1 | 41.533695000 | 44.748786000 | 43.864251000 |
| 1 | 44.602527000 | 44.870778000 | 43.756855000 |
| 1 | 43.631366000 | 45.447305000 | 45.105038000 |
| 1 | 42.082083000 | 43.754714000 | 46.308597000 |
| 1 | 45.243217000 | 42.528513000 | 43.655957000 |
| 1 | 42.043664000 | 41.496204000 | 47.314527000 |
| 1 | 45.213542000 | 40.280630000 | 44.670386000 |
| 1 | 43.612996000 | 39.740532000 | 46.500543000 |
| 6 | 43.056812000 | 51.984135000 | 36.159658000 |
| 6 | 41.779812000 | 52.782097000 | 36.441986000 |
| 8 | 41.822052000 | 53.892565000 | 36.963462000 |
| 6 | 43.482108000 | 51.075601000 | 37.331481000 |
| 6 | 42.738291000 | 49.738071000 | 37.385580000 |
| 7 | 43.357213000 | 48.759103000 | 38.050900000 |
| 8 | 41.619969000 | 49.585584000 | 36.850941000 |
| 1 | 42.952297000 | 51.386003000 | 35.247646000 |
| 1 | 44.559145000 | 50.878340000 | 37.280726000 |
| 1 | 43.317738000 | 51.601820000 | 38.281660000 |
| 1 | 44.288798000 | 48.857489000 | 38.467265000 |

|   |              |              |              |
|---|--------------|--------------|--------------|
| 1 | 42.915814000 | 47.845012000 | 38.153595000 |
| 7 | 40.617011000 | 52.166244000 | 36.062713000 |
| 6 | 39.317542000 | 52.678959000 | 36.452666000 |
| 6 | 38.579597000 | 51.930615000 | 37.580086000 |
| 8 | 37.444500000 | 52.287705000 | 37.888909000 |
| 1 | 40.705245000 | 51.180223000 | 35.837064000 |
| 1 | 39.465997000 | 53.709946000 | 36.783707000 |
| 7 | 39.259146000 | 50.914939000 | 38.169878000 |
| 6 | 38.684101000 | 50.068487000 | 39.203867000 |
| 6 | 38.582894000 | 48.599034000 | 38.742089000 |
| 6 | 38.096284000 | 47.677241000 | 39.839400000 |
| 6 | 36.734594000 | 47.624235000 | 40.170692000 |
| 6 | 38.992383000 | 46.871038000 | 40.559129000 |
| 6 | 36.275622000 | 46.789887000 | 41.191047000 |
| 6 | 38.535381000 | 46.025798000 | 41.576078000 |
| 6 | 37.175310000 | 45.985713000 | 41.895225000 |
| 1 | 40.150613000 | 50.621070000 | 37.779768000 |
| 1 | 37.698509000 | 50.476362000 | 39.440230000 |
| 1 | 37.903966000 | 48.555904000 | 37.880655000 |
| 1 | 39.567514000 | 48.274793000 | 38.385316000 |
| 1 | 36.027470000 | 48.238432000 | 39.616269000 |
| 1 | 40.053645000 | 46.896997000 | 40.317371000 |
| 1 | 35.214971000 | 46.761093000 | 41.430131000 |
| 1 | 39.231889000 | 45.377075000 | 42.100359000 |
| 1 | 36.819590000 | 45.324447000 | 42.681294000 |
| 6 | 40.159407000 | 46.457977000 | 30.431102000 |
| 6 | 40.628037000 | 45.227353000 | 29.652532000 |
| 7 | 41.401075000 | 44.370304000 | 30.363087000 |
| 8 | 40.314942000 | 45.064290000 | 28.474837000 |
| 1 | 40.470033000 | 46.449803000 | 31.479781000 |
| 1 | 39.067135000 | 46.514340000 | 30.377542000 |
| 1 | 41.743764000 | 43.512748000 | 29.933471000 |
| 1 | 41.617870000 | 44.540932000 | 31.341073000 |
| 6 | 52.303087000 | 41.489947000 | 34.018976000 |
| 6 | 51.433788000 | 40.844115000 | 35.102684000 |
| 8 | 51.248782000 | 41.417372000 | 36.188623000 |
| 6 | 51.869388000 | 41.256592000 | 32.559149000 |
| 6 | 50.464471000 | 41.780675000 | 32.188612000 |
| 6 | 50.401832000 | 43.315620000 | 32.192199000 |
| 6 | 50.018457000 | 41.205475000 | 30.836794000 |
| 1 | 52.337806000 | 42.557169000 | 34.257166000 |
| 1 | 52.612053000 | 41.734785000 | 31.902674000 |
| 1 | 51.917943000 | 40.185360000 | 32.325784000 |
| 1 | 49.755196000 | 41.409258000 | 32.940499000 |
| 1 | 50.663253000 | 43.741283000 | 33.168452000 |
| 1 | 51.091740000 | 43.737253000 | 31.447466000 |
| 1 | 49.392579000 | 43.663564000 | 31.942961000 |
| 1 | 50.702462000 | 41.511758000 | 30.031770000 |
| 1 | 49.987472000 | 40.112613000 | 30.885997000 |
| 1 | 49.010007000 | 41.548979000 | 30.582047000 |
| 7 | 50.941447000 | 39.622281000 | 34.824619000 |
| 6 | 49.960179000 | 38.952579000 | 35.673879000 |
| 6 | 49.439370000 | 37.688783000 | 34.962262000 |
| 6 | 48.958969000 | 38.015705000 | 33.528316000 |
| 8 | 49.852539000 | 38.251654000 | 32.682522000 |
| 8 | 47.698079000 | 38.065331000 | 33.332090000 |
| 1 | 50.958957000 | 39.260429000 | 33.867158000 |
| 1 | 49.130789000 | 39.638048000 | 35.890305000 |
| 1 | 50.252854000 | 36.955955000 | 34.893913000 |
| 1 | 48.630603000 | 37.255900000 | 35.558361000 |
| 6 | 49.747890000 | 44.398772000 | 36.818449000 |
| 6 | 49.467250000 | 43.892274000 | 38.223294000 |
| 8 | 48.953692000 | 44.626191000 | 39.087059000 |
| 1 | 50.219939000 | 45.383930000 | 36.884860000 |
| 1 | 48.796566000 | 44.521686000 | 36.287370000 |
| 7 | 49.790920000 | 42.609829000 | 38.462260000 |
| 6 | 49.552951000 | 41.967465000 | 39.753289000 |
| 6 | 49.409893000 | 40.456184000 | 39.587211000 |
| 1 | 50.246142000 | 42.074800000 | 37.722329000 |
| 1 | 48.651876000 | 42.398266000 | 40.199856000 |
| 1 | 50.301368000 | 40.017801000 | 39.121250000 |
| 1 | 49.271342000 | 39.985106000 | 40.566473000 |
| 1 | 48.543604000 | 40.209805000 | 38.963989000 |
| 6 | 46.280337000 | 46.718903000 | 37.765406000 |
| 6 | 46.590275000 | 47.542536000 | 39.010195000 |
| 8 | 45.939675000 | 48.553193000 | 39.322948000 |
| 6 | 45.593768000 | 45.381661000 | 38.148113000 |
| 6 | 44.275183000 | 45.626906000 | 38.895255000 |
| 8 | 44.349022000 | 45.692769000 | 40.175113000 |
| 8 | 43.229783000 | 45.805832000 | 38.225547000 |
| 1 | 45.631353000 | 47.303262000 | 37.108450000 |
| 1 | 45.387088000 | 44.832167000 | 37.228099000 |
| 1 | 46.276180000 | 44.784109000 | 38.758754000 |
| 7 | 47.588760000 | 47.031983000 | 39.763233000 |
| 6 | 47.804006000 | 47.355253000 | 41.163653000 |
| 6 | 47.661209000 | 46.093194000 | 42.031314000 |
| 6 | 48.083218000 | 46.351216000 | 43.474545000 |
| 8 | 46.317461000 | 45.602251000 | 42.068573000 |
| 1 | 48.086240000 | 46.209617000 | 39.406026000 |
| 1 | 47.075713000 | 48.117781000 | 41.452548000 |
| 1 | 48.309772000 | 45.317616000 | 41.596820000 |
| 1 | 45.822595000 | 45.735300000 | 41.220644000 |
| 1 | 47.480221000 | 47.153178000 | 43.916084000 |

1 47.936244000 45.446386000 44.072534000  
1 49.141317000 46.633323000 43.528467000  
6 37.093802000 39.004157000 44.096871000  
6 35.793543000 39.002195000 43.281503000  
8 34.689875000 39.090889000 43.817539000  
6 38.218555000 39.885510000 43.528994000  
6 39.348135000 40.116482000 44.533332000  
8 38.719481000 39.250249000 42.342496000  
1 36.823514000 39.336409000 45.102891000  
1 37.789170000 40.862997000 43.258164000  
1 39.121874000 39.952248000 41.767288000  
1 39.809674000 39.163706000 44.819117000  
1 40.119003000 40.762374000 44.100582000  
1 38.971768000 40.606196000 45.439824000  
7 35.980151000 38.885844000 41.936996000  
6 34.918116000 39.023712000 40.956749000  
6 35.263688000 40.062104000 39.869104000  
6 35.367962000 41.489950000 40.444358000  
6 34.247615000 39.976454000 38.720835000  
6 36.198846000 42.452651000 39.586435000  
1 36.951256000 38.881980000 41.629212000  
1 34.013054000 39.308846000 41.503151000  
1 36.252743000 39.790712000 39.464273000  
1 34.351698000 41.887084000 40.587316000  
1 35.817732000 41.437976000 41.443410000  
1 34.478696000 40.694173000 37.926556000  
1 34.233276000 38.975803000 38.271204000  
1 33.233942000 40.195257000 39.082551000  
1 36.186958000 43.464801000 40.006499000  
1 37.245460000 42.127876000 39.545393000  
1 35.821752000 42.519234000 38.558333000  
6 40.724171000 32.583938000 39.265052000  
6 41.346615000 33.968149000 39.469466000  
16 42.645958000 34.294745000 38.218097000  
1 40.262644000 32.503806000 38.274802000  
1 40.574590000 34.739819000 39.378206000  
1 41.773839000 34.051226000 40.474348000  
6 39.422268000 49.323751000 44.330695000  
6 40.589336000 50.032246000 43.645590000  
8 41.080368000 51.065981000 44.103144000  
6 39.869807000 48.430159000 45.509305000  
6 40.660324000 49.122830000 46.638068000  
6 39.893431000 50.300963000 47.256631000  
6 41.048337000 48.092216000 47.709403000  
1 38.739280000 50.102045000 44.685021000  
1 38.969584000 47.965934000 45.939482000  
1 40.475975000 47.604132000 45.111665000  
1 41.582806000 49.528593000 46.203427000  
1 39.762669000 51.104457000 46.526284000  
1 38.903723000 49.488702200 47.618257000  
1 40.442537000 50.714494000 48.112136000  
1 41.619352000 47.260117000 47.278829000  
1 41.663792000 48.548903000 48.494506000  
1 40.156693000 47.667863000 48.191366000  
7 41.047549000 49.418526000 42.519694000  
6 42.211395000 49.854874000 41.763837000  
6 43.260163000 48.739889000 41.647045000  
6 43.998638000 48.476527000 42.962589000  
8 42.554297000 47.587214000 41.189892000  
1 40.634896000 48.541867000 42.227661000  
1 42.615501000 50.734690000 42.269547000  
1 43.996548000 49.052951000 40.895038000  
1 43.189080000 46.926967000 40.820330000  
1 44.684210000 47.629805000 42.849467000  
1 44.583086000 49.356561000 43.261011000  
1 43.292882000 48.248619000 43.769631000  
8 43.846527000 38.256232000 38.541299000  
26 43.510063000 36.619207000 38.495555000  
7 42.876682000 36.664697000 40.417536000  
7 45.295865000 35.901051000 39.095894000  
7 41.653899000 37.169152000 37.891509000  
6 40.589324000 37.497234000 40.074324000  
6 44.947098000 35.966392000 41.527700000  
6 46.312815000 35.428257000 36.912257000  
6 42.049427000 37.208472000 35.474615000  
6 41.661876000 37.109539000 40.870437000  
6 45.705285000 35.707969000 40.392565000  
6 45.270492000 35.881621000 36.114310000  
6 41.265900000 37.413662000 36.601666000  
6 41.641899000 37.133396000 42.313719000  
6 47.035360000 35.146853000 40.416357000  
6 45.313451000 35.956339000 34.671997000  
6 39.914500000 37.928406000 36.577055000  
6 42.865535000 36.699649000 42.726232000  
6 47.412922000 34.976839000 39.119283000  
6 44.118974000 36.472543000 34.276121000  
6 39.498619000 37.998575000 37.869937000  
6 43.631477000 36.415425000 41.534474000  
6 46.317869000 35.444088000 38.303306000  
6 43.344192000 36.707357000 35.472059000  
6 40.598584000 37.532819000 38.686100000  
7 44.069457000 36.353726000 36.580920000  
1 39.691344000 37.824049000 40.588462000

1 45.416144000 35.785537000 42.490703000  
1 47.199302000 35.051757000 36.410844000  
1 41.608966000 37.448918000 34.511357000  
6 45.793325000 41.047295000 34.307273000  
6 45.307182000 41.211915000 36.498700000  
6 44.954086000 41.532453000 37.829808000  
6 46.125349000 39.007159000 37.232471000  
6 45.916825000 39.939964000 36.235456000  
6 45.218728000 41.896972000 35.248582000  
6 45.152644000 40.600491000 38.829179000  
6 45.669638000 39.293646000 38.538379000  
7 46.206617000 39.882789000 34.883715000  
6 44.641006000 43.257007000 34.974478000  
6 43.193883000 43.424296000 35.492628000  
7 42.727042000 44.803136000 35.461254000  
6 42.149563000 45.344229000 34.368236000  
8 41.992039000 44.711613000 33.310564000  
6 41.688047000 46.785746000 34.497011000  
8 44.820779000 40.998772000 40.102475000  
6 44.819620000 40.024743000 41.150095000  
1 45.961175000 41.200783000 33.248854000  
1 44.543195000 42.500583000 38.093684000  
1 42.219869000 47.394673000 33.757667000  
1 45.842344000 39.710381000 41.393983000  
1 44.215874000 39.159196000 40.868891000  
1 44.389461000 40.526888000 42.017398000  
1 46.575152000 38.044979000 37.024907000  
1 45.973311000 38.641934000 39.344656000  
1 45.262499000 44.036732000 35.435346000  
1 44.651522000 43.459492000 33.897446000  
1 43.118680000 43.087619000 36.528669000  
1 42.517289000 42.808802000 34.894969000  
1 41.836765000 47.220016000 35.488710000  
1 40.622705000 46.834524000 34.248630000  
1 46.693941000 39.118729000 34.388235000  
1 42.843641000 45.342680000 36.323058000  
8 46.629854000 42.746360000 41.736712000  
1 45.995903000 42.456142000 41.057794000  
1 46.468483000 43.707022000 41.850954000  
1 41.479200000 31.793640000 39.348325000  
1 39.951068000 32.395768000 40.022693000  
1 43.781353000 36.693286000 33.271369000  
1 46.171887000 35.707097000 34.063087000  
1 48.340298000 34.573359000 38.731992000  
1 47.586798000 34.908039000 41.317414000  
1 43.236756000 36.589124000 43.737691000  
1 40.794881000 37.469183000 42.897362000  
1 38.549220000 38.345536000 38.257963000  
1 39.376737000 38.202119000 35.677964000  
1 48.810708000 47.773038000 41.305767000  
1 47.207799000 46.495426000 37.224739000  
1 41.895695000 50.146752000 40.753684000  
1 38.869658000 48.704464000 43.613795000  
1 42.674557000 42.645378000 40.091554000  
1 42.469098000 46.050003000 43.097682000  
1 34.718107000 38.052110000 40.479247000  
1 37.473396000 37.975638000 44.178093000  
1 44.587340000 39.797471000 28.999285000  
1 42.304686000 42.302159000 32.470359000  
1 40.554131000 47.357208000 29.945286000  
1 39.297542000 50.126253000 40.112586000  
1 38.635861000 52.701603000 35.594456000  
1 43.840755000 52.727894000 35.992763000  
1 50.385583000 42.193950000 40.436379000  
1 50.383971000 43.716589000 36.249462000  
1 50.416052000 38.691386000 36.636845000  
1 53.327151000 41.112872000 34.156883000

4TS1C6,II

6 42.107216000 41.297412000 31.868508000  
6 43.020041000 41.228352000 30.649138000  
8 42.791428000 41.863135000 29.614335000  
6 40.615503000 41.126514000 31.511697000  
6 39.745568000 41.463916000 32.738759000  
6 40.338445000 39.723500000 30.950763000  
6 38.237044000 41.495675000 32.463803000  
1 42.402236000 40.550026000 32.618171000  
1 40.391456000 41.859593000 30.726292000  
1 39.956746000 40.741264000 33.542252000  
1 40.057515000 42.445528000 33.117493000  
1 39.294884000 39.611620000 30.636582000  
1 40.966550000 39.519039000 30.076512000  
1 40.544690000 38.950438000 31.704459000  
1 37.847430000 40.512806000 32.173385000  
1 37.685686000 41.816320000 33.355748000  
1 38.000426000 42.199797000 31.656237000  
7 44.105653000 40.417649000 30.766352000  
6 45.167166000 40.382512000 29.768496000  
6 46.244118000 39.400937000 30.220285000  
8 46.687958000 39.811918000 31.493303000  
1 44.372760000 40.085429000 31.684702000  
1 45.603753000 41.382755000 29.643313000  
1 45.823710000 38.381478000 30.250155000

|   |              |              |              |    |              |              |              |
|---|--------------|--------------|--------------|----|--------------|--------------|--------------|
| 1 | 47.059797000 | 39.400474000 | 29.478843000 | 6  | 49.038644000 | 38.146111000 | 33.317941000 |
| 1 | 47.179115000 | 39.080456000 | 31.960308000 | 8  | 49.823549000 | 38.502140000 | 32.408525000 |
| 6 | 41.535906000 | 42.642832000 | 40.575431000 | 8  | 47.766078000 | 38.064716000 | 33.225258000 |
| 6 | 41.559761000 | 43.303407000 | 41.950059000 | 1  | 50.980678000 | 39.522031000 | 33.514199000 |
| 8 | 40.617574000 | 43.122647000 | 42.754154000 | 1  | 49.325451000 | 39.730398000 | 35.691830000 |
| 6 | 40.816836000 | 41.288103000 | 40.626080000 | 1  | 50.523720000 | 37.151722000 | 34.526480000 |
| 8 | 39.466253000 | 41.426196000 | 41.091817000 | 1  | 48.954552000 | 37.320312000 | 35.344592000 |
| 1 | 41.014662000 | 43.316679000 | 39.882612000 | 6  | 49.860186000 | 44.477802000 | 36.660203000 |
| 1 | 40.776231000 | 40.841069000 | 39.629464000 | 6  | 49.545215000 | 43.898647000 | 38.028980000 |
| 1 | 41.373578000 | 40.597169000 | 41.275128000 | 8  | 48.985485000 | 44.579062000 | 38.907266000 |
| 1 | 39.553531000 | 42.089764000 | 41.821614000 | 1  | 50.313019000 | 45.465609000 | 36.790559000 |
| 7 | 42.618688000 | 44.078347000 | 42.240439000 | 1  | 48.923591000 | 44.613929000 | 36.106523000 |
| 6 | 42.709669000 | 44.835749000 | 43.485621000 | 7  | 49.892588000 | 42.613951000 | 38.221485000 |
| 6 | 43.949692000 | 44.473297000 | 44.326785000 | 6  | 49.632793000 | 41.913565000 | 39.477918000 |
| 6 | 43.931059000 | 43.070378000 | 44.899056000 | 6  | 49.500681000 | 40.409971000 | 39.246502000 |
| 6 | 43.061604000 | 42.742004000 | 45.950331000 | 1  | 50.384598000 | 42.123980000 | 37.473518000 |
| 6 | 44.778513000 | 42.071915000 | 44.398563000 | 1  | 48.721336000 | 42.321873000 | 39.924249000 |
| 6 | 43.034405000 | 41.455937000 | 46.489638000 | 1  | 50.406028000 | 39.993173000 | 38.787571000 |
| 6 | 44.756376000 | 40.783123000 | 44.941655000 | 1  | 49.338862000 | 39.899422000 | 40.202176000 |
| 6 | 43.886123000 | 40.469042000 | 45.986536000 | 1  | 48.652366000 | 40.185610000 | 38.590657000 |
| 1 | 43.258224000 | 44.342839000 | 41.488469000 | 6  | 46.199551000 | 46.547737000 | 37.697897000 |
| 1 | 41.793678000 | 44.632613000 | 44.043978000 | 6  | 46.531245000 | 47.401291000 | 38.916404000 |
| 1 | 44.850375000 | 44.627646000 | 43.723003000 | 8  | 45.859790000 | 48.394698000 | 39.240330000 |
| 1 | 43.997181000 | 45.202644000 | 45.148339000 | 6  | 45.562586000 | 45.201136000 | 38.131020000 |
| 1 | 42.397119000 | 43.505424000 | 46.350915000 | 6  | 44.259347000 | 45.426727000 | 38.911404000 |
| 1 | 45.460606000 | 42.297511000 | 43.580267000 | 8  | 44.371401000 | 45.528831000 | 40.186536000 |
| 1 | 42.350805000 | 41.224944000 | 47.303415000 | 8  | 43.188805000 | 45.554043000 | 38.270529000 |
| 1 | 45.427041000 | 40.024521000 | 44.544456000 | 1  | 45.512380000 | 47.102221000 | 37.053865000 |
| 1 | 43.870423000 | 39.465943000 | 46.406391000 | 1  | 45.346179000 | 44.623822000 | 37.230562000 |
| 6 | 42.837813000 | 51.722732000 | 36.182132000 | 1  | 46.279093000 | 44.636916000 | 38.734520000 |
| 6 | 41.570614000 | 52.533315000 | 36.474854000 | 7  | 47.573156000 | 46.933656000 | 39.637559000 |
| 8 | 41.630604000 | 53.673522000 | 36.925728000 | 6  | 47.824741000 | 47.270321000 | 41.028573000 |
| 6 | 43.289738000 | 50.837870000 | 37.363866000 | 6  | 47.749359000 | 46.006947000 | 41.903832000 |
| 6 | 42.561837000 | 49.493910000 | 37.454108000 | 6  | 48.214425000 | 46.282769000 | 43.330649000 |
| 7 | 43.223732000 | 48.518955000 | 38.083134000 | 8  | 46.423822000 | 45.474526000 | 41.987990000 |
| 8 | 41.417611000 | 49.331630000 | 36.980260000 | 1  | 48.087517000 | 46.127372000 | 39.267911000 |
| 1 | 42.707805000 | 51.104591000 | 35.286668000 | 1  | 47.084300000 | 48.011988000 | 41.339863000 |
| 1 | 44.367982000 | 50.652102000 | 37.300992000 | 1  | 48.406436000 | 45.250405000 | 41.448683000 |
| 1 | 43.132896000 | 51.378121000 | 38.307558000 | 1  | 45.887443000 | 45.606744000 | 41.165240000 |
| 1 | 44.172368000 | 48.628570000 | 38.456709000 | 1  | 47.604838000 | 47.068945000 | 43.791007000 |
| 1 | 42.794915000 | 47.602300000 | 38.209638000 | 1  | 48.115220000 | 45.376718000 | 43.936610000 |
| 7 | 40.395543000 | 51.890476000 | 36.190738000 | 1  | 49.265182000 | 46.595598000 | 43.345820000 |
| 6 | 39.113418000 | 52.417143000 | 36.617522000 | 6  | 36.845603000 | 39.354800000 | 44.503283000 |
| 6 | 38.434478000 | 51.717052000 | 37.810966000 | 6  | 35.518480000 | 39.402732000 | 43.733704000 |
| 8 | 37.315897000 | 52.086150000 | 38.162532000 | 8  | 34.444382000 | 39.599416000 | 44.300595000 |
| 1 | 40.481207000 | 50.893672000 | 36.013212000 | 6  | 38.001308000 | 40.141472000 | 43.861988000 |
| 1 | 39.271981000 | 53.462497000 | 36.894489000 | 6  | 39.189124000 | 40.309619000 | 44.810923000 |
| 7 | 39.145340000 | 50.726545000 | 38.407587000 | 8  | 38.400867000 | 39.441771000 | 42.676260000 |
| 6 | 38.621793000 | 49.918272000 | 39.497549000 | 1  | 36.634143000 | 39.741344000 | 45.503946000 |
| 6 | 38.471764000 | 48.438098000 | 39.085123000 | 1  | 37.628783000 | 41.140998000 | 43.586066000 |
| 6 | 38.048130000 | 47.554318000 | 40.238101000 | 1  | 38.847549000 | 40.085355000 | 42.069390000 |
| 6 | 36.710750000 | 47.528754000 | 40.659343000 | 1  | 39.596509000 | 39.329771000 | 45.087495000 |
| 6 | 38.980101000 | 46.757355000 | 40.921233000 | 1  | 39.981297000 | 40.895555000 | 44.333347000 |
| 6 | 36.310511000 | 46.730173000 | 41.731779000 | 1  | 38.889296000 | 40.833930000 | 45.726763000 |
| 6 | 38.582060000 | 45.947151000 | 41.990169000 | 7  | 35.647205000 | 39.198777000 | 42.392822000 |
| 6 | 37.245542000 | 45.934471000 | 42.398668000 | 6  | 34.564494000 | 39.367134000 | 41.440620000 |
| 1 | 40.012985000 | 50.413820000 | 37.980988000 | 6  | 34.935131000 | 40.347287000 | 40.307737000 |
| 1 | 37.657966000 | 50.347846000 | 39.780381000 | 6  | 35.133805000 | 41.784973000 | 40.830800000 |
| 1 | 37.736647000 | 48.380875000 | 38.272075000 | 6  | 33.883081000 | 40.280490000 | 39.190959000 |
| 1 | 39.426510000 | 48.090374000 | 38.673248000 | 6  | 35.987797000 | 42.673869000 | 39.917764000 |
| 1 | 35.975699000 | 48.136292000 | 40.134741000 | 1  | 36.605897000 | 39.120546000 | 42.055170000 |
| 1 | 40.023440000 | 46.762854000 | 40.609946000 | 1  | 33.695114000 | 39.723642000 | 42.002767000 |
| 1 | 35.267781000 | 46.722500000 | 42.040914000 | 1  | 35.895256000 | 40.007394000 | 39.886439000 |
| 1 | 39.304837000 | 45.303729000 | 42.484729000 | 1  | 34.145413000 | 42.241577000 | 40.990785000 |
| 1 | 36.934683000 | 45.300069000 | 43.224892000 | 1  | 35.611239000 | 41.740734000 | 41.817238000 |
| 6 | 40.273588000 | 46.655263000 | 30.477272000 | 1  | 34.126648000 | 40.962376000 | 38.369238000 |
| 6 | 40.799781000 | 45.494460000 | 29.631299000 | 1  | 33.805664000 | 39.269242000 | 38.772395000 |
| 7 | 41.513110000 | 44.570516000 | 30.320302000 | 1  | 32.892286000 | 40.560614000 | 39.573192000 |
| 8 | 40.580465000 | 45.440040000 | 28.422849000 | 1  | 36.038254000 | 43.698263000 | 40.303417000 |
| 1 | 40.490716000 | 46.546413000 | 31.543721000 | 1  | 37.015453000 | 42.295221000 | 39.860624000 |
| 1 | 39.190686000 | 46.732464000 | 30.334729000 | 1  | 35.585724000 | 42.725139000 | 38.898165000 |
| 1 | 41.881819000 | 43.749091000 | 29.844098000 | 6  | 41.451973000 | 32.171448000 | 39.377166000 |
| 1 | 41.650900000 | 44.647744000 | 31.324370000 | 6  | 41.881442000 | 33.635190000 | 39.510755000 |
| 6 | 52.282234000 | 41.780216000 | 33.646883000 | 16 | 42.749457000 | 34.197311000 | 37.992477000 |
| 6 | 51.525101000 | 41.068236000 | 34.772482000 | 1  | 40.777659000 | 32.033995000 | 38.524393000 |
| 8 | 51.419891000 | 41.590655000 | 35.894901000 | 1  | 41.007337000 | 34.271051000 | 39.685960000 |
| 6 | 51.714992000 | 41.606092000 | 32.224655000 | 1  | 42.550561000 | 33.751169000 | 40.369687000 |
| 6 | 50.275129000 | 42.122274000 | 32.014145000 | 6  | 39.624217000 | 49.305716000 | 44.530731000 |
| 6 | 50.197602000 | 43.655033000 | 32.076877000 | 6  | 40.757431000 | 49.978094000 | 43.758468000 |
| 6 | 49.705363000 | 41.586416000 | 30.692535000 | 8  | 41.242194000 | 51.051631000 | 44.122301000 |
| 1 | 52.326400000 | 42.835748000 | 33.931648000 | 6  | 40.096117000 | 48.656999000 | 45.851367000 |
| 1 | 52.385174000 | 42.125964000 | 31.523513000 | 6  | 40.757945000 | 49.590643000 | 46.885643000 |
| 1 | 51.754309000 | 40.547666000 | 31.938108000 | 6  | 39.849892000 | 50.762208000 | 47.286994000 |
| 1 | 49.647740000 | 41.714834000 | 32.818623000 | 6  | 41.184763000 | 48.778606000 | 48.118210000 |
| 1 | 50.556863000 | 44.051461000 | 33.034161000 | 1  | 38.876086000 | 50.077854000 | 44.738769000 |
| 1 | 50.801081000 | 44.109599000 | 31.278612000 | 1  | 39.223116000 | 48.175523000 | 46.317430000 |
| 1 | 49.164537000 | 43.998040000 | 31.946253000 | 1  | 40.797171000 | 47.845377000 | 45.610223000 |
| 1 | 50.314863000 | 41.915283000 | 29.838210000 | 1  | 41.656227000 | 50.019027000 | 46.424896000 |
| 1 | 49.675347000 | 40.492438000 | 30.711979000 | 1  | 39.680182000 | 51.431202000 | 46.438646000 |
| 1 | 48.680517000 | 41.941242000 | 30.537376000 | 1  | 38.877106000 | 50.406427000 | 47.655725000 |
| 7 | 51.041760000 | 39.846230000 | 34.483690000 | 1  | 40.311547000 | 51.353141000 | 48.088273000 |
| 6 | 50.173654000 | 39.101590000 | 35.390098000 | 1  | 41.857204000 | 47.955909000 | 47.844984000 |
| 6 | 49.672234000 | 37.823817000 | 34.691568000 | 1  | 41.707879000 | 49.410105000 | 48.847251000 |

|    |              |              |              |                  |              |              |              |  |
|----|--------------|--------------|--------------|------------------|--------------|--------------|--------------|--|
| 1  | 40.313128000 | 48.340151000 | 48.623966000 | 1                | 42.552880000 | 42.501219000 | 40.194545000 |  |
| 7  | 41.192602000 | 49.292635000 | 42.665688000 | 1                | 42.731717000 | 45.898264000 | 43.227527000 |  |
| 6  | 42.310545000 | 49.705041000 | 41.831365000 | 1                | 34.294062000 | 38.393731000 | 41.003126000 |  |
| 6  | 43.351688000 | 48.585784000 | 41.693706000 | 1                | 37.165311000 | 38.308510000 | 44.611228000 |  |
| 6  | 44.153283000 | 48.358540000 | 42.978906000 | 1                | 44.749393000 | 40.085435000 | 28.800236000 |  |
| 8  | 42.624815000 | 47.420018000 | 41.305868000 | 1                | 42.249912000 | 42.285230000 | 32.326939000 |  |
| 1  | 40.777872000 | 48.398500000 | 42.437099000 | 1                | 40.715484000 | 47.589546000 | 30.113551000 |  |
| 1  | 42.740307000 | 50.601235000 | 42.284578000 | 1                | 39.289966000 | 49.991424000 | 40.365513000 |  |
| 1  | 44.049574000 | 48.875830000 | 40.897731000 | 1                | 38.391444000 | 52.399305000 | 35.792703000 |  |
| 1  | 43.236737000 | 46.762223000 | 40.896372000 | 1                | 43.619896000 | 52.458869000 | 35.978372000 |  |
| 1  | 44.830522000 | 47.506357000 | 42.856872000 | 1                | 50.450204000 | 42.113811000 | 40.186994000 |  |
| 1  | 44.753323000 | 49.244969000 | 43.222758000 | 1                | 50.525159000 | 43.834695000 | 36.079060000 |  |
| 1  | 43.486727000 | 48.156774000 | 43.825309000 | 1                | 50.722469000 | 38.849070000 | 36.305666000 |  |
| 8  | 44.137627000 | 38.180885000 | 38.487536000 | 1                | 53.318965000 | 41.413654000 | 33.669580000 |  |
| 26 | 43.464508000 | 36.478486000 | 38.343662000 | <b>2IM1C6,II</b> |              |              |              |  |
| 7  | 41.841550000 | 36.954298000 | 39.392823000 | 6                | 41.464714000 | 42.393825000 | 31.361866000 |  |
| 7  | 44.391827000 | 35.884189000 | 40.047787000 | 6                | 42.507762000 | 42.265228000 | 30.256897000 |  |
| 7  | 42.525054000 | 36.973840000 | 36.626317000 | 8                | 42.528733000 | 43.005010000 | 29.268137000 |  |
| 6  | 40.361498000 | 37.642787000 | 37.553842000 | 6                | 40.041033000 | 42.662874000 | 30.837251000 |  |
| 6  | 42.669789000 | 36.526084000 | 41.668332000 | 6                | 39.122588000 | 43.063496000 | 32.009063000 |  |
| 6  | 46.503943000 | 35.067796000 | 39.090256000 | 6                | 39.508309000 | 41.460385000 | 30.043473000 |  |
| 6  | 44.330966000 | 36.538493000 | 35.021196000 | 6                | 37.722969000 | 43.531169000 | 31.592066000 |  |
| 6  | 40.654803000 | 37.433755000 | 38.893598000 | 1                | 41.467773000 | 41.495418000 | 31.995727000 |  |
| 6  | 43.917287000 | 36.011831000 | 41.324917000 | 1                | 40.110139000 | 43.519409000 | 30.155266000 |  |
| 6  | 46.242574000 | 35.337185000 | 37.751608000 | 1                | 39.031908000 | 42.216409000 | 32.706502000 |  |
| 6  | 43.055679000 | 36.961668000 | 35.362460000 | 1                | 39.614907000 | 43.870336000 | 32.567260000 |  |
| 6  | 39.751572000 | 37.736995000 | 39.976999000 | 1                | 38.523890000 | 41.666149000 | 29.608589000 |  |
| 6  | 44.896010000 | 35.523165000 | 42.267269000 | 1                | 40.183779000 | 41.208093000 | 29.218522000 |  |
| 6  | 47.183941000 | 35.127123000 | 36.675230000 | 1                | 39.411488000 | 40.574461000 | 30.686847000 |  |
| 6  | 42.075633000 | 37.435706000 | 34.410524000 | 1                | 37.143796000 | 42.730242000 | 31.117735000 |  |
| 6  | 40.405896000 | 37.448916000 | 41.135358000 | 1                | 37.152345000 | 43.877621000 | 32.461956000 |  |
| 6  | 45.965262000 | 35.097902000 | 41.537210000 | 1                | 37.784362000 | 44.364320000 | 30.880767000 |  |
| 6  | 46.581718000 | 35.564201000 | 35.532367000 | 7                | 43.436599000 | 41.288670000 | 30.437549000 |  |
| 6  | 40.950316000 | 37.725495000 | 35.117242000 | 6                | 44.641875000 | 41.202042000 | 29.624127000 |  |
| 6  | 41.709970000 | 36.954589000 | 40.763496000 | 6                | 45.497572000 | 40.046664000 | 30.131762000 |  |
| 6  | 45.644848000 | 35.333105000 | 40.149218000 | 8                | 45.714244000 | 40.252047000 | 31.511727000 |  |
| 6  | 45.267248000 | 36.026182000 | 35.912654000 | 1                | 43.512186000 | 40.847009000 | 31.345436000 |  |
| 6  | 41.246560000 | 37.439352000 | 36.503602000 | 1                | 45.207283000 | 42.142281000 | 29.684054000 |  |
| 7  | 45.086910000 | 35.882922000 | 37.260364000 | 1                | 44.975459000 | 39.092423000 | 29.948919000 |  |
| 1  | 39.375469000 | 38.027816000 | 37.312797000 | 1                | 46.442338000 | 40.023215000 | 29.567373000 |  |
| 1  | 42.420443000 | 36.580565000 | 42.723643000 | 1                | 46.131558000 | 39.448812000 | 31.931711000 |  |
| 1  | 47.470585000 | 34.634807000 | 39.330968000 | 6                | 40.665775000 | 41.514049000 | 40.576441000 |  |
| 1  | 44.622249000 | 36.601765000 | 33.977608000 | 6                | 40.950334000 | 42.443883000 | 41.749016000 |  |
| 6  | 45.823643000 | 40.964589000 | 34.285225000 | 8                | 40.050583000 | 42.706583000 | 42.573703000 |  |
| 6  | 45.288747000 | 41.094103000 | 36.465787000 | 6                | 39.853859000 | 40.296030000 | 41.027388000 |  |
| 6  | 44.895716000 | 41.398580000 | 37.792193000 | 8                | 38.595202000 | 40.682888000 | 41.598108000 |  |
| 6  | 46.260318000 | 38.952110000 | 37.206202000 | 1                | 40.084638000 | 42.085505000 | 39.840511000 |  |
| 6  | 45.991004000 | 39.859913000 | 36.213418000 | 1                | 39.639927000 | 39.648531000 | 40.172554000 |  |
| 6  | 45.180451000 | 41.774357000 | 35.221955000 | 1                | 40.435585000 | 39.709557000 | 41.750419000 |  |
| 6  | 45.121176000 | 40.482955000 | 38.792641000 | 1                | 38.816915000 | 41.476150000 | 42.145865000 |  |
| 6  | 45.687671000 | 39.167204000 | 38.509276000 | 7                | 42.189492000 | 42.966151000 | 41.824283000 |  |
| 7  | 46.311475000 | 39.833265000 | 34.864998000 | 6                | 42.595416000 | 43.978236000 | 42.803327000 |  |
| 6  | 44.545280000 | 43.108161000 | 34.943754000 | 6                | 43.819331000 | 43.566679000 | 43.629671000 |  |
| 6  | 43.089701000 | 43.225727000 | 35.453217000 | 6                | 43.678886000 | 42.358021000 | 44.539779000 |  |
| 7  | 42.606496000 | 44.598911000 | 35.484011000 | 6                | 42.463689000 | 41.981791000 | 45.130788000 |  |
| 6  | 42.043594000 | 45.190023000 | 34.409092000 | 6                | 44.826019000 | 41.607264000 | 44.845591000 |  |
| 8  | 41.899341000 | 44.605725000 | 33.322001000 | 6                | 42.403451000 | 40.902591000 | 46.016515000 |  |
| 6  | 41.580161000 | 46.623878000 | 34.597267000 | 6                | 44.768560000 | 40.532407000 | 45.733777000 |  |
| 8  | 44.765901000 | 40.857718000 | 40.058988000 | 6                | 43.555119000 | 40.177671000 | 46.328844000 |  |
| 6  | 44.790651000 | 39.881139000 | 41.108242000 | 1                | 42.867292000 | 42.679442000 | 41.126535000 |  |
| 1  | 45.981477000 | 41.123422000 | 33.226019000 | 1                | 41.721888000 | 44.165316000 | 43.430414000 |  |
| 1  | 44.436114000 | 42.346850000 | 38.047493000 | 1                | 44.675361000 | 43.408319000 | 42.962032000 |  |
| 1  | 42.134525000 | 47.268979000 | 33.906664000 | 1                | 44.088410000 | 44.442594000 | 44.238826000 |  |
| 1  | 45.823180000 | 39.644317000 | 41.393170000 | 1                | 41.550007000 | 42.515225000 | 44.885329000 |  |
| 1  | 44.262015000 | 38.977730000 | 40.797821000 | 1                | 45.765673000 | 41.867056000 | 44.363146000 |  |
| 1  | 44.292180000 | 40.352087000 | 41.956251000 | 1                | 41.450020000 | 40.628825000 | 46.462311000 |  |
| 1  | 46.804363000 | 38.035383000 | 37.015568000 | 1                | 45.672057000 | 39.969479000 | 45.957202000 |  |
| 1  | 46.149711000 | 38.635930000 | 39.332547000 | 1                | 43.506588000 | 39.342045000 | 47.023145000 |  |
| 1  | 45.133082000 | 43.910742000 | 35.409005000 | 6                | 43.819505000 | 52.966486000 | 36.549105000 |  |
| 1  | 44.557228000 | 43.312932000 | 33.867230000 | 6                | 42.426405000 | 53.557809000 | 36.792059000 |  |
| 1  | 43.007790000 | 42.836648000 | 36.470078000 | 8                | 42.263986000 | 54.526703000 | 37.527627000 |  |
| 1  | 42.427067000 | 42.632778000 | 34.818324000 | 6                | 44.217341000 | 51.897516000 | 37.586530000 |  |
| 1  | 41.699359000 | 47.006514000 | 35.613617000 | 6                | 43.620103000 | 50.514398000 | 37.314340000 |  |
| 1  | 40.522875000 | 46.687882000 | 34.320081000 | 7                | 44.189702000 | 49.490532000 | 37.960360000 |  |
| 1  | 46.810979000 | 39.083782000 | 34.358960000 | 8                | 42.644929000 | 50.361191000 | 36.550652000 |  |
| 1  | 42.738093000 | 45.108152000 | 36.361958000 | 1                | 43.898952000 | 52.547993000 | 35.539847000 |  |
| 8  | 46.708957000 | 42.620628000 | 41.559109000 | 1                | 45.309538000 | 51.805775000 | 37.627996000 |  |
| 1  | 45.995746000 | 42.355099000 | 40.953546000 | 1                | 43.904783000 | 52.221341000 | 38.588299000 |  |
| 1  | 46.572146000 | 43.578787000 | 41.717589000 | 1                | 45.049781000 | 49.564859000 | 38.509611000 |  |
| 1  | 42.319362000 | 31.518945000 | 39.226977000 | 1                | 43.849675000 | 48.538892000 | 37.794740000 |  |
| 1  | 40.926012000 | 31.841357000 | 40.283990000 | 7                | 41.406955000 | 52.931373000 | 36.125015000 |  |
| 1  | 46.981136000 | 35.622854000 | 34.528161000 | 6                | 40.013698000 | 53.210747000 | 36.419316000 |  |
| 1  | 48.176857000 | 34.711971000 | 36.797536000 | 6                | 39.253247000 | 52.170672000 | 37.267323000 |  |
| 1  | 46.895298000 | 34.669049000 | 41.889785000 | 8                | 38.062126000 | 52.354284000 | 37.508837000 |  |
| 1  | 44.764959000 | 35.513621000 | 43.342352000 | 1                | 41.648011000 | 52.032515000 | 35.719819000 |  |
| 1  | 40.045917000 | 37.590311000 | 42.145652000 | 1                | 39.983780000 | 54.159232000 | 36.961120000 |  |
| 1  | 38.755029000 | 38.141398000 | 39.855365000 | 7                | 39.977494000 | 51.107999000 | 37.696908000 |  |
| 1  | 40.002965000 | 38.104664000 | 34.755036000 | 6                | 39.426447000 | 50.021628000 | 38.491026000 |  |
| 1  | 42.245659000 | 37.521713000 | 33.344482000 | 6                | 39.460713000 | 48.676029000 | 37.730081000 |  |
| 1  | 48.822482000 | 47.718630000 | 41.135928000 | 6                | 39.178956000 | 47.502024000 | 38.642281000 |  |
| 1  | 47.112819000 | 46.336942000 | 37.128884000 | 6                | 37.867711000 | 47.165296000 | 39.009329000 |  |
| 1  | 41.939931000 | 49.963858000 | 40.830613000 | 6                | 40.236681000 | 46.760842000 | 39.189785000 |  |
| 1  | 39.135293000 | 48.538987000 | 43.918081000 |                  |              |              |              |  |

|   |              |              |              |    |              |              |              |
|---|--------------|--------------|--------------|----|--------------|--------------|--------------|
| 6 | 37.617018000 | 46.121987000 | 39.903742000 | 1  | 38.103570000 | 39.661028000 | 46.312131000 |
| 6 | 39.988105000 | 45.721504000 | 40.090062000 | 7  | 34.941132000 | 38.237663000 | 42.774393000 |
| 6 | 38.678096000 | 45.397170000 | 40.453790000 | 6  | 33.859691000 | 38.426017000 | 41.824683000 |
| 1 | 40.937581000 | 50.997707000 | 37.382900000 | 6  | 34.191834000 | 39.498256000 | 40.765890000 |
| 1 | 38.403784000 | 50.299433000 | 38.756201000 | 6  | 34.321012000 | 40.903171000 | 41.389662000 |
| 1 | 38.735151000 | 48.719030000 | 36.907722000 | 6  | 33.148958000 | 39.460979000 | 39.639257000 |
| 1 | 40.453406000 | 48.562625000 | 37.278467000 | 6  | 35.130699000 | 41.892112000 | 40.541445000 |
| 1 | 37.035302000 | 47.726592000 | 38.588583000 | 1  | 35.905383000 | 38.219303000 | 42.444986000 |
| 1 | 41.265133000 | 46.985727000 | 38.916270000 | 1  | 32.971432000 | 38.702035000 | 42.402351000 |
| 1 | 36.592145000 | 45.875028000 | 40.171500000 | 1  | 35.168562000 | 39.232471000 | 40.330369000 |
| 1 | 40.827777000 | 45.173134000 | 40.505125000 | 1  | 33.312486000 | 41.300489000 | 41.578405000 |
| 1 | 38.496692000 | 44.587395000 | 41.155578000 | 1  | 34.801474000 | 40.812933000 | 42.371452000 |
| 6 | 40.995166000 | 48.118382000 | 30.405242000 | 1  | 33.368134000 | 40.202165000 | 38.863253000 |
| 6 | 41.336683000 | 46.943950000 | 29.486981000 | 1  | 33.115512000 | 38.475950000 | 39.157412000 |
| 7 | 41.824032000 | 45.848312000 | 30.118815000 | 1  | 32.145548000 | 39.675753000 | 40.030709000 |
| 8 | 41.185253000 | 47.028863000 | 28.269798000 | 1  | 35.130561000 | 42.889663000 | 40.996780000 |
| 1 | 40.997379000 | 47.854905000 | 31.466842000 | 1  | 36.174728000 | 41.567068000 | 40.459662000 |
| 1 | 40.009792000 | 48.505213000 | 30.128578000 | 1  | 34.725302000 | 41.996414000 | 39.527555000 |
| 1 | 42.050997000 | 45.012651000 | 29.582848000 | 6  | 42.728898000 | 32.050800000 | 41.311005000 |
| 1 | 41.912728000 | 45.799123000 | 31.131503000 | 6  | 42.649396000 | 33.529929000 | 40.924437000 |
| 6 | 51.771560000 | 41.357077000 | 33.338817000 | 16 | 44.315311000 | 34.172269000 | 40.487995000 |
| 6 | 50.956452000 | 40.750414000 | 34.485219000 | 1  | 43.120972000 | 31.448720000 | 40.483249000 |
| 8 | 50.998730000 | 41.244721000 | 35.624370000 | 1  | 41.977158000 | 33.656896000 | 40.069700000 |
| 6 | 51.112118000 | 41.334160000 | 31.947152000 | 1  | 42.238166000 | 34.111538000 | 41.756023000 |
| 6 | 49.783488000 | 42.113937000 | 31.833757000 | 6  | 39.415784000 | 48.588031000 | 43.427797000 |
| 6 | 50.001859000 | 43.633238000 | 31.894984000 | 6  | 40.736667000 | 49.264796000 | 43.065785000 |
| 6 | 49.032416000 | 41.705143000 | 30.558510000 | 8  | 41.140903000 | 50.259243000 | 43.673816000 |
| 1 | 52.015337000 | 42.378529000 | 33.645659000 | 6  | 39.498132000 | 47.750351000 | 44.723595000 |
| 1 | 51.828932000 | 41.745082000 | 31.220639000 | 6  | 39.927754000 | 48.493610000 | 46.005227000 |
| 1 | 50.941861000 | 40.295897000 | 31.635703000 | 6  | 39.029130000 | 49.699400000 | 46.316322000 |
| 1 | 49.149173000 | 41.825785000 | 32.683603000 | 6  | 39.963070000 | 47.512009000 | 47.186776000 |
| 1 | 50.503976000 | 43.944362000 | 32.818976000 | 1  | 38.671164000 | 49.382766000 | 43.542605000 |
| 1 | 50.615605000 | 43.973859000 | 31.049517000 | 1  | 38.509140000 | 47.297928000 | 44.891955000 |
| 1 | 49.045526000 | 44.167033000 | 31.844954000 | 1  | 40.188988000 | 46.912299000 | 44.554719000 |
| 1 | 49.641261000 | 41.895925000 | 29.663205000 | 1  | 40.942371000 | 48.878574000 | 45.845805000 |
| 1 | 48.778888000 | 40.640862000 | 30.597704000 | 1  | 39.138016000 | 50.470155000 | 45.548242000 |
| 1 | 48.098223000 | 42.269689000 | 30.456914000 | 1  | 37.971190000 | 49.405692000 | 46.375633000 |
| 7 | 50.252725000 | 39.641166000 | 34.193033000 | 1  | 39.302458000 | 50.147863000 | 47.280079000 |
| 6 | 49.332062000 | 39.013486000 | 35.134714000 | 1  | 40.624558000 | 46.660656000 | 46.983469000 |
| 6 | 48.608108000 | 37.841506000 | 34.447541000 | 1  | 40.321440000 | 48.003980000 | 48.099869000 |
| 6 | 47.932732000 | 38.285671000 | 33.132893000 | 1  | 38.962105000 | 47.110314000 | 47.397264000 |
| 8 | 48.687763000 | 38.592093000 | 32.181759000 | 7  | 41.422077000 | 48.678866000 | 42.047860000 |
| 8 | 46.654809000 | 38.338439000 | 33.117024000 | 6  | 42.732856000 | 49.108570000 | 41.587404000 |
| 1 | 50.080015000 | 39.367523000 | 33.221536000 | 6  | 43.753758000 | 47.959400000 | 41.643842000 |
| 1 | 48.605831000 | 39.754790000 | 35.495256000 | 6  | 44.202349000 | 47.624605000 | 43.067977000 |
| 1 | 49.344319000 | 37.064689000 | 34.205308000 | 8  | 43.152351000 | 46.818196000 | 41.029867000 |
| 1 | 47.878302000 | 37.414437000 | 35.139733000 | 1  | 41.058323000 | 47.841034000 | 41.610685000 |
| 6 | 50.109976000 | 44.407134000 | 36.403524000 | 1  | 43.036635000 | 49.951198000 | 42.213327000 |
| 6 | 49.654658000 | 43.896619000 | 37.760314000 | 1  | 44.631886000 | 48.271922000 | 41.062562000 |
| 8 | 49.230400000 | 44.675631000 | 38.631805000 | 1  | 43.790839000 | 46.437286000 | 40.374153000 |
| 1 | 50.779581000 | 45.259529000 | 36.555399000 | 1  | 44.937355000 | 46.814110000 | 43.035566000 |
| 1 | 49.236958000 | 44.770620000 | 35.848727000 | 1  | 44.661953000 | 48.496000000 | 43.552155000 |
| 7 | 49.722467000 | 42.565309000 | 37.945102000 | 1  | 43.346940000 | 47.308793000 | 43.676639000 |
| 6 | 49.307716000 | 41.919487000 | 39.189506000 | 8  | 43.913472000 | 38.267182000 | 39.214532000 |
| 6 | 48.884145000 | 40.474012000 | 38.940446000 | 26 | 44.139291000 | 36.373287000 | 39.809331000 |
| 1 | 50.118021000 | 41.989605000 | 37.201049000 | 7  | 42.856013000 | 36.797231000 | 41.308067000 |
| 1 | 48.486101000 | 42.491386000 | 39.629100000 | 7  | 45.720437000 | 36.814414000 | 41.001066000 |
| 1 | 49.697081000 | 39.887329000 | 38.495214000 | 7  | 42.571557000 | 35.957302000 | 38.618312000 |
| 1 | 48.598576000 | 39.998155000 | 39.884282000 | 6  | 40.727643000 | 36.534642000 | 40.125051000 |
| 1 | 48.024686000 | 40.428460000 | 38.262240000 | 6  | 44.490281000 | 37.248436000 | 43.084133000 |
| 6 | 47.043489000 | 47.545344000 | 37.417980000 | 6  | 47.571053000 | 36.377366000 | 39.451545000 |
| 6 | 47.289778000 | 47.972420000 | 38.863180000 | 6  | 43.807509000 | 35.192615000 | 36.639682000 |
| 8 | 46.684813000 | 48.925273000 | 39.379741000 | 6  | 41.487731000 | 36.819202000 | 41.253894000 |
| 6 | 46.280281000 | 46.198651000 | 37.321440000 | 6  | 45.656158000 | 37.123645000 | 42.334453000 |
| 6 | 44.982334000 | 46.218947000 | 38.147876000 | 6  | 46.811684000 | 35.927229000 | 38.375283000 |
| 8 | 45.081553000 | 45.878273000 | 39.365698000 | 6  | 42.639989000 | 35.492407000 | 37.333690000 |
| 8 | 43.919236000 | 46.612241000 | 37.589586000 | 6  | 40.937938000 | 37.157311000 | 42.551348000 |
| 1 | 46.471718000 | 48.336970000 | 36.928128000 | 6  | 46.987630000 | 37.321481000 | 42.863314000 |
| 1 | 46.043381000 | 46.022026000 | 36.267397000 | 6  | 47.357733000 | 35.416918000 | 37.138919000 |
| 1 | 46.926443000 | 45.392327000 | 37.680303000 | 6  | 41.308210000 | 35.363577000 | 36.780366000 |
| 7 | 48.194467000 | 47.214637000 | 39.523918000 | 6  | 42.000122000 | 37.329933000 | 43.385957000 |
| 6 | 48.384691000 | 47.254658000 | 40.966155000 | 6  | 47.854938000 | 37.113510000 | 41.834458000 |
| 6 | 48.109534000 | 45.880499000 | 41.598504000 | 6  | 46.297289000 | 35.063188000 | 36.357955000 |
| 6 | 48.481527000 | 45.860877000 | 43.077799000 | 6  | 40.441505000 | 35.762681000 | 37.750536000 |
| 8 | 46.729588000 | 45.523191000 | 41.509772000 | 6  | 43.194172000 | 37.106232000 | 42.598596000 |
| 1 | 48.612394000 | 46.418280000 | 39.036597000 | 6  | 47.053773000 | 36.773469000 | 40.679943000 |
| 1 | 47.708246000 | 48.010981000 | 41.372392000 | 6  | 45.103606000 | 35.363586000 | 37.115530000 |
| 1 | 48.714199000 | 45.135930000 | 41.060329000 | 6  | 41.243828000 | 36.125378000 | 38.899223000 |
| 1 | 46.358625000 | 45.706755000 | 40.610372000 | 7  | 45.442963000 | 35.891456000 | 38.335746000 |
| 1 | 47.914217000 | 46.620305000 | 43.628325000 | 1  | 39.647588000 | 36.600701000 | 40.219730000 |
| 1 | 48.247601000 | 44.881905000 | 43.508136000 | 1  | 44.598946000 | 37.516118000 | 44.131003000 |
| 1 | 49.552432000 | 46.051544000 | 43.214899000 | 1  | 48.651637000 | 36.368035000 | 39.341822000 |
| 6 | 36.103500000 | 38.242018000 | 44.910647000 | 1  | 43.698972000 | 34.804806000 | 35.630758000 |
| 6 | 34.787570000 | 38.322699000 | 44.125563000 | 6  | 45.161153000 | 41.055706000 | 34.481423000 |
| 8 | 33.700275000 | 38.438317000 | 44.689049000 | 6  | 44.748510000 | 41.228334000 | 36.680032000 |
| 6 | 37.238278000 | 39.134368000 | 44.379735000 | 6  | 44.470769000 | 41.573342000 | 38.027388000 |
| 6 | 38.411902000 | 39.215415000 | 45.358264000 | 6  | 45.169235000 | 38.875567000 | 37.269942000 |
| 8 | 37.674640000 | 38.602159000 | 43.123427000 | 6  | 45.109245000 | 39.857814000 | 36.349237000 |
| 1 | 35.863267000 | 38.510171000 | 45.943110000 | 6  | 44.782172000 | 41.968567000 | 35.487827000 |
| 1 | 36.838926000 | 40.149070000 | 44.223563000 | 6  | 44.528454000 | 40.609962000 | 39.002240000 |
| 1 | 38.027152000 | 39.352773000 | 42.581183000 | 6  | 44.878390000 | 39.133473000 | 38.732440000 |
| 1 | 38.814531000 | 38.214530000 | 45.553452000 | 7  | 45.339541000 | 39.818304000 | 34.966371000 |
| 1 | 39.215097000 | 39.829469000 | 44.935798000 | 6  | 44.532219000 | 43.436247000 | 35.290195000 |

|   |              |              |              |   |              |              |              |
|---|--------------|--------------|--------------|---|--------------|--------------|--------------|
| 6 | 43.044485000 | 43.856767000 | 35.334198000 | 6 | 43.799321000 | 43.629702000 | 43.589162000 |
| 7 | 42.898605000 | 45.299428000 | 35.239984000 | 6 | 43.685771000 | 42.424393000 | 44.507011000 |
| 6 | 42.478177000 | 45.936076000 | 34.124724000 | 6 | 42.489116000 | 42.054476000 | 45.138385000 |
| 8 | 42.139221000 | 45.346397000 | 33.085043000 | 6 | 44.840998000 | 41.673882000 | 44.781735000 |
| 6 | 42.425737000 | 47.451178000 | 34.221976000 | 6 | 42.455388000 | 40.983675000 | 46.035422000 |
| 8 | 44.282803000 | 41.034570000 | 40.256032000 | 6 | 44.810066000 | 40.606972000 | 45.681015000 |
| 6 | 44.486949000 | 40.146083000 | 41.387085000 | 6 | 43.615848000 | 40.260388000 | 46.318313000 |
| 1 | 45.331131000 | 41.240174000 | 33.424696000 | 1 | 42.834165000 | 42.718120000 | 41.098275000 |
| 1 | 44.229033000 | 42.596572000 | 38.301981000 | 1 | 41.691662000 | 44.198654000 | 43.407546000 |
| 1 | 42.998360000 | 47.878282000 | 33.392159000 | 1 | 44.650684000 | 43.479801000 | 42.914220000 |
| 1 | 45.557478000 | 40.083931000 | 41.599765000 | 1 | 44.061965000 | 44.512355000 | 44.191276000 |
| 1 | 44.065302000 | 39.174093000 | 41.155994000 | 1 | 41.569369000 | 42.588177000 | 44.917209000 |
| 1 | 43.978461000 | 40.623524000 | 42.222736000 | 1 | 45.764832000 | 41.928808000 | 44.267237000 |
| 1 | 45.388319000 | 37.848599000 | 37.010811000 | 1 | 41.516431000 | 40.715351000 | 46.513937000 |
| 1 | 45.866302000 | 38.995049000 | 39.241399000 | 1 | 45.719566000 | 40.045004000 | 45.881619000 |
| 1 | 45.066697000 | 43.998613000 | 36.064408000 | 1 | 43.588669000 | 39.432848000 | 47.023501000 |
| 1 | 44.949771000 | 43.755235000 | 34.327895000 | 6 | 43.771646000 | 53.045359000 | 36.568002000 |
| 1 | 42.589599000 | 43.516333000 | 36.271968000 | 6 | 42.371256000 | 53.620395000 | 36.808187000 |
| 1 | 42.493169000 | 43.404923000 | 34.507384000 | 8 | 42.195466000 | 54.583887000 | 37.547772000 |
| 1 | 42.805436000 | 47.848655000 | 35.166061000 | 6 | 44.176731000 | 51.974611000 | 37.600733000 |
| 1 | 41.386688000 | 47.776153000 | 34.100482000 | 6 | 43.594362000 | 50.587064000 | 37.318957000 |
| 1 | 45.769430000 | 39.053820000 | 34.397707000 | 7 | 44.171161000 | 49.565230000 | 37.961683000 |
| 1 | 43.209021000 | 45.852101000 | 36.047761000 | 8 | 42.623953000 | 50.428179000 | 36.550257000 |
| 8 | 46.579383000 | 42.719346000 | 41.523354000 | 1 | 43.859913000 | 52.633730000 | 35.556657000 |
| 1 | 45.878836000 | 42.517343000 | 40.883359000 | 1 | 45.269675000 | 51.893540000 | 37.644954000 |
| 1 | 46.614866000 | 43.704284000 | 41.542793000 | 1 | 43.857956000 | 52.289677000 | 38.603331000 |
| 1 | 43.390158000 | 31.903670000 | 42.172790000 | 1 | 45.027548000 | 49.644190000 | 38.515695000 |
| 1 | 41.733934000 | 31.664787000 | 41.574280000 | 1 | 43.840250000 | 48.611297000 | 37.789599000 |
| 1 | 46.306234000 | 34.646888000 | 35.358281000 | 7 | 41.361329000 | 52.986304000 | 36.133984000 |
| 1 | 48.414443000 | 35.337415000 | 36.915392000 | 6 | 39.964016000 | 53.250157000 | 36.423199000 |
| 1 | 48.936995000 | 37.161383000 | 41.843000000 | 6 | 39.209968000 | 52.198051000 | 37.261879000 |
| 1 | 47.210071000 | 37.584622000 | 43.890149000 | 8 | 38.016019000 | 52.368778000 | 37.498907000 |
| 1 | 41.997592000 | 37.611035000 | 44.431752000 | 1 | 41.613527000 | 52.091958000 | 35.725572000 |
| 1 | 39.881951000 | 37.266930000 | 42.771025000 | 1 | 39.922171000 | 54.195221000 | 36.970164000 |
| 1 | 39.359969000 | 35.809025000 | 37.713454000 | 7 | 39.942302000 | 51.139876000 | 37.688993000 |
| 1 | 41.087684000 | 35.018725000 | 35.777492000 | 6 | 39.397503000 | 50.044933000 | 38.475657000 |
| 1 | 49.416291000 | 47.555926000 | 41.198768000 | 6 | 39.442464000 | 48.703763000 | 37.707567000 |
| 1 | 48.001951000 | 47.445209000 | 36.892876000 | 6 | 39.164313000 | 47.523434000 | 38.612802000 |
| 1 | 42.655666000 | 49.456462000 | 40.549035000 | 6 | 37.854456000 | 47.185271000 | 38.983735000 |
| 1 | 39.073301000 | 47.938973000 | 42.613059000 | 6 | 40.224024000 | 46.777974000 | 39.150450000 |
| 1 | 41.587363000 | 41.179444000 | 40.089644000 | 6 | 37.607132000 | 46.136841000 | 39.873052000 |
| 1 | 42.826854000 | 44.908386000 | 42.270668000 | 6 | 39.978739000 | 45.732815000 | 40.044953000 |
| 1 | 33.636530000 | 37.474830000 | 41.317328000 | 6 | 38.670298000 | 45.407629000 | 40.413351000 |
| 1 | 36.462272000 | 37.202974000 | 44.910840000 | 1 | 40.904830000 | 51.040197000 | 37.378909000 |
| 1 | 44.368574000 | 41.052492000 | 28.573947000 | 1 | 38.372342000 | 50.314008000 | 38.740169000 |
| 1 | 41.777594000 | 43.235746000 | 31.995282000 | 1 | 38.719446000 | 48.747014000 | 36.882965000 |
| 1 | 41.719393000 | 48.924684000 | 30.240460000 | 1 | 40.437276000 | 48.598201000 | 37.258749000 |
| 1 | 40.001301000 | 49.925738000 | 39.421271000 | 1 | 37.020490000 | 47.749859000 | 38.570547000 |
| 1 | 39.441852000 | 53.340446000 | 35.493017000 | 1 | 41.251345000 | 47.005119000 | 38.874562000 |
| 1 | 44.516711000 | 53.805229000 | 36.628682000 | 1 | 36.583386000 | 45.889625000 | 40.144747000 |
| 1 | 50.134253000 | 41.948834000 | 39.914832000 | 1 | 40.819545000 | 45.180268000 | 40.452069000 |
| 1 | 50.613254000 | 43.636701000 | 35.814778000 | 1 | 38.491352000 | 44.594894000 | 41.112514000 |
| 1 | 49.884663000 | 38.661128000 | 36.013768000 | 6 | 41.224751000 | 48.230034000 | 30.275139000 |
| 1 | 52.726699000 | 40.813646000 | 33.296487000 | 6 | 41.566314000 | 47.040263000 | 29.376805000 |
|   |              |              |              | 7 | 42.012948000 | 45.940551000 | 30.031136000 |
|   |              |              |              | 8 | 41.448821000 | 47.117019000 | 28.155351000 |
|   |              |              |              | 1 | 41.203236000 | 47.979175000 | 31.339556000 |
|   |              |              |              | 1 | 40.250343000 | 48.627672000 | 29.975664000 |
|   |              |              |              | 1 | 42.239741000 | 45.096374000 | 29.508468000 |
|   |              |              |              | 1 | 42.076725000 | 45.900414000 | 31.046056000 |
|   |              |              |              | 6 | 51.863702000 | 41.245521000 | 33.464406000 |
|   |              |              |              | 6 | 50.987636000 | 40.707318000 | 34.599649000 |
|   |              |              |              | 8 | 50.997619000 | 41.246845000 | 35.718608000 |
|   |              |              |              | 6 | 51.252373000 | 41.196462000 | 32.051440000 |
|   |              |              |              | 6 | 49.953655000 | 42.011562000 | 31.865066000 |
|   |              |              |              | 6 | 50.214730000 | 43.524972000 | 31.900090000 |
|   |              |              |              | 6 | 49.243197000 | 41.594152000 | 30.569402000 |
|   |              |              |              | 1 | 52.131453000 | 42.268166000 | 33.745848000 |
|   |              |              |              | 1 | 52.006712000 | 41.561338000 | 31.338454000 |
|   |              |              |              | 1 | 51.060127000 | 40.154218000 | 31.767446000 |
|   |              |              |              | 1 | 49.276255000 | 41.761961000 | 32.693473000 |
|   |              |              |              | 1 | 50.683791000 | 43.844533000 | 32.838430000 |
|   |              |              |              | 1 | 50.876398000 | 43.825692000 | 31.075824000 |
|   |              |              |              | 1 | 49.278324000 | 44.085092000 | 31.793527000 |
|   |              |              |              | 1 | 49.892482000 | 41.746879000 | 29.695415000 |
|   |              |              |              | 1 | 48.957697000 | 40.538545000 | 30.621441000 |
|   |              |              |              | 1 | 48.330300000 | 42.181786000 | 30.417738000 |
|   |              |              |              | 7 | 50.265828000 | 39.605626000 | 34.322427000 |
|   |              |              |              | 6 | 49.283553000 | 39.046807000 | 35.245134000 |
|   |              |              |              | 6 | 48.549821000 | 37.873251000 | 34.570415000 |
|   |              |              |              | 6 | 47.950595000 | 38.287616000 | 33.208740000 |
|   |              |              |              | 8 | 48.759716000 | 38.532689000 | 32.284917000 |
|   |              |              |              | 8 | 46.677796000 | 38.381361000 | 33.130367000 |
|   |              |              |              | 1 | 50.124747000 | 39.299725000 | 33.355290000 |
|   |              |              |              | 1 | 48.568152000 | 39.825346000 | 35.543178000 |
|   |              |              |              | 1 | 49.267558000 | 37.062327000 | 34.393119000 |
|   |              |              |              | 1 | 47.773237000 | 37.499548000 | 35.243000000 |
|   |              |              |              | 6 | 50.095946000 | 44.436091000 | 36.417855000 |
|   |              |              |              | 6 | 49.637849000 | 43.949543000 | 37.782635000 |
|   |              |              |              | 8 | 49.214437000 | 44.744172000 | 38.640378000 |
|   |              |              |              | 1 | 50.765613000 | 45.290759000 | 36.555892000 |
|   |              |              |              | 1 | 49.224201000 | 44.790054000 | 35.855018000 |
|   |              |              |              | 7 | 49.702266000 | 42.621426000 | 37.989439000 |

**4IM1C6.II**

|   |              |              |              |
|---|--------------|--------------|--------------|
| 6 | 41.616057000 | 42.496067000 | 31.295558000 |
| 6 | 42.666618000 | 42.349761000 | 30.200082000 |
| 8 | 42.705424000 | 43.085426000 | 29.208860000 |
| 6 | 40.198416000 | 42.768973000 | 30.756141000 |
| 6 | 39.271931000 | 43.183307000 | 31.916737000 |
| 6 | 39.666198000 | 41.563476000 | 29.966570000 |
| 6 | 37.878439000 | 43.655086000 | 31.484128000 |
| 1 | 41.607580000 | 41.603793000 | 31.937985000 |
| 1 | 40.278365000 | 43.620063000 | 30.068468000 |
| 1 | 39.170573000 | 42.341900000 | 32.619591000 |
| 1 | 39.763655000 | 43.991734000 | 32.473026000 |
| 1 | 38.686430000 | 41.770975000 | 29.522158000 |
| 1 | 40.347015000 | 41.301612000 | 29.149006000 |
| 1 | 39.559556000 | 40.682774000 | 30.615543000 |
| 1 | 37.299444000 | 42.854010000 | 31.009831000 |
| 1 | 37.301903000 | 44.009919000 | 32.346702000 |
| 1 | 37.950124000 | 44.483430000 | 30.768164000 |
| 7 | 43.580273000 | 41.360802000 | 30.391113000 |
| 6 | 44.787511000 | 41.249612000 | 29.583522000 |
| 6 | 45.627164000 | 40.089540000 | 30.106661000 |
| 8 | 45.855883000 | 40.314310000 | 31.481668000 |
| 1 | 43.641138000 | 40.920866000 | 31.300787000 |
| 1 | 45.364502000 | 42.183194000 | 29.634742000 |
| 1 | 45.089147000 | 39.140885000 | 29.942187000 |
| 1 | 46.568116000 | 40.041791000 | 29.537073000 |
| 1 | 46.235585000 | 39.501613000 | 31.917621000 |
| 6 | 40.648688000 | 41.497364000 | 40.596689000 |
| 6 | 40.930544000 | 42.451804000 | 41.749918000 |
| 8 | 40.036089000 | 42.707643000 | 42.582779000 |
| 6 | 39.892825000 | 40.258468000 | 41.087330000 |
| 8 | 38.638396000 | 40.608802000 | 41.690411000 |
| 1 | 40.027407000 | 42.036534000 | 39.869379000 |
| 1 | 39.678148000 | 39.591097000 | 40.248395000 |
| 1 | 40.515785000 | 39.704041000 | 41.801584000 |
| 1 | 38.843772000 | 41.426579000 | 42.208572000 |
| 7 | 42.160157000 | 42.998360000 | 41.802741000 |
| 6 | 42.561635000 | 44.020671000 | 42.772904000 |

|    |              |              |              |    |              |              |              |
|----|--------------|--------------|--------------|----|--------------|--------------|--------------|
| 6  | 49.284909000 | 41.997130000 | 39.243764000 | 8  | 43.832502000 | 38.387836000 | 39.121305000 |
| 6  | 48.876892000 | 40.542991000 | 39.020554000 | 26 | 43.933547000 | 36.306490000 | 39.771956000 |
| 1  | 50.100161000 | 42.032390000 | 37.257191000 | 7  | 42.893596000 | 36.792364000 | 41.427791000 |
| 1  | 48.454171000 | 42.568238000 | 39.666621000 | 7  | 45.676930000 | 36.639483000 | 40.766370000 |
| 1  | 49.698467000 | 39.955730000 | 38.592195000 | 7  | 42.201460000 | 36.024267000 | 38.766728000 |
| 1  | 48.589606000 | 40.083672000 | 39.972027000 | 6  | 40.610142000 | 36.584741000 | 40.545188000 |
| 1  | 48.021986000 | 40.476127000 | 38.338353000 | 6  | 44.761002000 | 37.233913000 | 42.965232000 |
| 6  | 47.034594000 | 47.629582000 | 37.423585000 | 6  | 47.271309000 | 36.032147000 | 39.001712000 |
| 6  | 47.270756000 | 48.045700000 | 38.873510000 | 6  | 43.117486000 | 35.314794000 | 36.603091000 |
| 8  | 46.661587000 | 48.994080000 | 39.393191000 | 6  | 41.528592000 | 36.847891000 | 41.554867000 |
| 6  | 46.275664000 | 46.281784000 | 37.312083000 | 6  | 45.809592000 | 37.003385000 | 42.081184000 |
| 6  | 44.973366000 | 46.292280000 | 38.131853000 | 6  | 46.353078000 | 35.683399000 | 38.014566000 |
| 8  | 45.065834000 | 45.938122000 | 39.346270000 | 6  | 42.071696000 | 35.631325000 | 37.460846000 |
| 8  | 43.913152000 | 46.691793000 | 37.572175000 | 6  | 41.168595000 | 37.234413000 | 42.900128000 |
| 1  | 46.463600000 | 48.423583000 | 36.936709000 | 6  | 47.208451000 | 37.104309000 | 42.427579000 |
| 1  | 46.044756000 | 46.113431000 | 36.255382000 | 6  | 46.705895000 | 35.207381000 | 36.698728000 |
| 1  | 46.921954000 | 45.474047000 | 37.667506000 | 6  | 40.673223000 | 35.569742000 | 37.100272000 |
| 7  | 48.171360000 | 47.283217000 | 39.534702000 | 6  | 42.336861000 | 37.411701000 | 43.579971000 |
| 6  | 48.352217000 | 47.314199000 | 40.978355000 | 6  | 47.915071000 | 36.779315000 | 41.308953000 |
| 6  | 48.079005000 | 45.934895000 | 41.600046000 | 6  | 45.537224000 | 35.010757000 | 36.022541000 |
| 6  | 48.439088000 | 45.908382000 | 43.082191000 | 6  | 39.966595000 | 35.925535000 | 38.208320000 |
| 8  | 46.701624000 | 45.570856000 | 41.497963000 | 6  | 43.409262000 | 37.132059000 | 42.653830000 |
| 1  | 48.592132000 | 46.490166000 | 39.044741000 | 6  | 46.949088000 | 36.476019000 | 40.278594000 |
| 1  | 47.669973000 | 48.065099000 | 41.384997000 | 6  | 44.469087000 | 35.359737000 | 36.927111000 |
| 1  | 48.691837000 | 45.196892000 | 41.062232000 | 6  | 40.933373000 | 36.205495000 | 39.246227000 |
| 1  | 46.336477000 | 45.758459000 | 40.597023000 | 7  | 44.989873000 | 35.766938000 | 38.130036000 |
| 1  | 47.863201000 | 46.661368000 | 43.632641000 | 1  | 39.557712000 | 36.676441000 | 40.796806000 |
| 1  | 48.207078000 | 44.925585000 | 43.504799000 | 1  | 45.015506000 | 37.529380000 | 43.978451000 |
| 1  | 49.507782000 | 46.104060000 | 43.229080000 | 1  | 48.325052000 | 35.929372000 | 38.759871000 |
| 6  | 36.253730000 | 38.171519000 | 45.070587000 | 1  | 42.859115000 | 34.998231000 | 35.596941000 |
| 6  | 34.968367000 | 38.103954000 | 44.234829000 | 6  | 45.171323000 | 41.148216000 | 34.430478000 |
| 8  | 33.853697000 | 38.183933000 | 44.748366000 | 6  | 44.742097000 | 41.328254000 | 36.626648000 |
| 6  | 37.335137000 | 39.120327000 | 44.526266000 | 6  | 44.458140000 | 41.683661000 | 37.971617000 |
| 6  | 38.454865000 | 39.359688000 | 45.541211000 | 6  | 45.129164000 | 38.970730000 | 37.221458000 |
| 8  | 37.868389000 | 38.550242000 | 43.324507000 | 6  | 45.088000000 | 39.952357000 | 36.298252000 |
| 1  | 35.951983000 | 38.479106000 | 46.075511000 | 6  | 44.793616000 | 42.065720000 | 35.432347000 |
| 1  | 36.862757000 | 40.086448000 | 44.288203000 | 6  | 44.502095000 | 40.718595000 | 38.944882000 |
| 1  | 38.170113000 | 39.295104000 | 42.744516000 | 6  | 44.816945000 | 39.235714000 | 38.676905000 |
| 1  | 38.923487000 | 38.409154000 | 45.822109000 | 7  | 45.327358000 | 39.908325000 | 34.917239000 |
| 1  | 39.226614000 | 40.005477000 | 45.107551000 | 6  | 44.559332000 | 43.535371000 | 35.230344000 |
| 1  | 38.071902000 | 39.842668000 | 46.448587000 | 6  | 43.076222000 | 43.970801000 | 35.284245000 |
| 7  | 35.183289000 | 37.935330000 | 42.899510000 | 7  | 42.940383000 | 45.414429000 | 35.186707000 |
| 6  | 34.135253000 | 38.002938000 | 41.896854000 | 6  | 42.556918000 | 46.051994000 | 34.059168000 |
| 6  | 34.419190000 | 39.076007000 | 40.824673000 | 8  | 42.248629000 | 45.462401000 | 33.009705000 |
| 6  | 34.380405000 | 40.500731000 | 41.413780000 | 6  | 42.508011000 | 47.567520000 | 34.152232000 |
| 6  | 33.446099000 | 38.911355000 | 39.647708000 | 8  | 44.262855000 | 41.132815000 | 40.205332000 |
| 6  | 35.125586000 | 41.545637000 | 40.573725000 | 6  | 44.447582000 | 40.214560000 | 41.318005000 |
| 1  | 36.158969000 | 37.970372000 | 42.608065000 | 1  | 45.360429000 | 41.330552000 | 33.376794000 |
| 1  | 33.200203000 | 38.211856000 | 42.426561000 | 1  | 44.226472000 | 42.710883000 | 38.240536000 |
| 1  | 35.438760000 | 38.896005000 | 40.447230000 | 1  | 43.135160000 | 47.990386000 | 33.360266000 |
| 1  | 33.329925000 | 40.799030000 | 41.548529000 | 1  | 45.514872000 | 40.145639000 | 41.545512000 |
| 1  | 34.822651000 | 40.481243000 | 42.417214000 | 1  | 44.028226000 | 39.248220000 | 41.052898000 |
| 1  | 33.634541000 | 39.652296000 | 38.863449000 | 1  | 43.927656000 | 40.671733000 | 42.158235000 |
| 1  | 33.532872000 | 37.916941000 | 39.192475000 | 1  | 45.336133000 | 37.937919000 | 36.969988000 |
| 1  | 32.407105000 | 39.036662000 | 39.981030000 | 1  | 45.798892000 | 39.078773000 | 39.202679000 |
| 1  | 35.009879000 | 42.547847000 | 41.003284000 | 1  | 45.105497000 | 44.095368000 | 35.998077000 |
| 1  | 36.198411000 | 41.321485000 | 40.541166000 | 1  | 44.972435000 | 43.845611000 | 34.263287000 |
| 1  | 34.754549000 | 41.588159000 | 39.542375000 | 1  | 42.625559000 | 43.639842000 | 36.227073000 |
| 6  | 42.377424000 | 31.914708000 | 41.611528000 | 1  | 42.514864000 | 43.519419000 | 34.463877000 |
| 6  | 42.421490000 | 33.388880000 | 41.201729000 | 1  | 42.829394000 | 47.964369000 | 35.118086000 |
| 16 | 44.029940000 | 33.837242000 | 40.430511000 | 1  | 41.481020000 | 47.898404000 | 33.963687000 |
| 1  | 42.524895000 | 31.263417000 | 40.742390000 | 1  | 45.761511000 | 39.137802000 | 34.359831000 |
| 1  | 41.612721000 | 33.598655000 | 40.491452000 | 1  | 43.232522000 | 45.964375000 | 36.003169000 |
| 1  | 42.249010000 | 34.021819000 | 42.080252000 | 8  | 46.559758000 | 42.767563000 | 41.509230000 |
| 6  | 39.363390000 | 48.580988000 | 43.397225000 | 1  | 45.858520000 | 42.563385000 | 40.870231000 |
| 6  | 40.679551000 | 49.271929000 | 43.044686000 | 1  | 46.593227000 | 43.752723000 | 41.527968000 |
| 8  | 41.072463000 | 50.266116000 | 43.660515000 | 1  | 43.168666000 | 31.686778000 | 42.335001000 |
| 6  | 39.447701000 | 47.736044000 | 44.688135000 | 1  | 41.409651000 | 31.662281000 | 42.070236000 |
| 6  | 39.865590000 | 48.474858000 | 45.976183000 | 1  | 45.398816000 | 34.667935000 | 35.004988000 |
| 6  | 38.955618000 | 49.671162000 | 46.290745000 | 1  | 47.718473000 | 35.049366000 | 36.349257000 |
| 6  | 39.904019000 | 47.486215000 | 47.151765000 | 1  | 48.989480000 | 36.732587000 | 41.180261000 |
| 1  | 38.611186000 | 49.368320000 | 43.513756000 | 1  | 47.583226000 | 37.383172000 | 43.404585000 |
| 1  | 38.461961000 | 47.274102000 | 44.849591000 | 1  | 42.478932000 | 37.730083000 | 44.604893000 |
| 1  | 40.146397000 | 46.904965000 | 44.516950000 | 1  | 40.150949000 | 37.376683000 | 43.245489000 |
| 1  | 40.877626000 | 48.869277000 | 45.823621000 | 1  | 38.892719000 | 35.995819000 | 38.330363000 |
| 1  | 39.061375000 | 50.447257000 | 45.527633000 | 1  | 40.300143000 | 35.287899000 | 36.123408000 |
| 1  | 37.899934000 | 49.368265000 | 46.343835000 | 1  | 49.380975000 | 47.618311000 | 41.219812000 |
| 1  | 39.221124000 | 50.116153000 | 47.258289000 | 1  | 47.996483000 | 47.536267000 | 36.903510000 |
| 1  | 40.573376000 | 46.641609000 | 46.946045000 | 1  | 42.604816000 | 49.496912000 | 40.535260000 |
| 1  | 40.254412000 | 47.975380000 | 48.069441000 | 1  | 39.030075000 | 47.933985000 | 42.577069000 |
| 1  | 38.905513000 | 47.074972000 | 47.355418000 | 1  | 41.567093000 | 41.186583000 | 40.088664000 |
| 7  | 41.373880000 | 48.698936000 | 42.025450000 | 1  | 42.776844000 | 44.951357000 | 42.234522000 |
| 6  | 42.681985000 | 49.144018000 | 41.571938000 | 1  | 34.023560000 | 37.023484000 | 41.407497000 |
| 6  | 43.713691000 | 48.004365000 | 41.625467000 | 1  | 36.691820000 | 37.166240000 | 45.146181000 |
| 6  | 44.162589000 | 47.667867000 | 43.049109000 | 1  | 44.516166000 | 41.091341000 | 28.534026000 |
| 8  | 43.123981000 | 46.860442000 | 41.005528000 | 1  | 41.928333000 | 43.342091000 | 31.923704000 |
| 1  | 41.019688000 | 47.860381000 | 41.581852000 | 1  | 41.963459000 | 49.023846000 | 30.114371000 |
| 1  | 42.975371000 | 49.986064000 | 42.203579000 | 1  | 39.971012000 | 49.948072000 | 39.406592000 |
| 1  | 44.590126000 | 48.327416000 | 41.047380000 | 1  | 39.395197000 | 53.379462000 | 35.494972000 |
| 1  | 43.768237000 | 46.486140000 | 40.351603000 | 1  | 44.459445000 | 53.891052000 | 36.655479000 |
| 1  | 44.903833000 | 46.863154000 | 43.014768000 | 1  | 50.106022000 | 42.048933000 | 39.974051000 |
| 1  | 44.614470000 | 48.540995000 | 43.537410000 | 1  | 50.600214000 | 43.655605000 | 35.843300000 |
| 1  | 43.308669000 | 47.343014000 | 43.655114000 | 1  | 49.784051000 | 38.711333000 | 36.161182000 |

1 52.800090000 40.668983000 33.474013000  
**2TS1HA,II**  
6 40.212668000 45.092868000 33.340810000  
6 40.476167000 44.582313000 31.928480000  
8 40.076785000 45.174469000 30.919378000  
6 38.813577000 45.708233000 33.529424000  
6 38.763090000 46.468209000 34.869986000  
6 37.717247000 44.639990000 33.403185000  
6 37.474815000 47.262855000 35.113674000  
1 40.374669000 44.288926000 34.072686000  
1 38.674991000 46.436845000 32.720246000  
1 38.913501000 45.758989000 35.698180000  
1 39.616120000 47.157804000 34.902836000  
1 36.714254000 45.076496000 33.469419000  
1 37.787457000 44.123621000 32.439348000  
1 37.807355000 43.888060000 34.200053000  
1 36.595332000 46.612587000 35.191635000  
1 37.546376000 47.833314000 36.047310000  
1 37.291121000 47.975625000 34.299594000  
7 41.203672000 43.437886000 31.848415000  
6 41.723240000 42.918758000 30.592294000  
6 42.313005000 41.533576000 30.832418000  
8 43.303555000 41.650218000 31.831715000  
1 41.661197000 43.076897000 32.676628000  
1 42.498990000 43.587263000 30.191797000  
1 41.511380000 40.843366000 31.143027000  
1 42.729264000 41.153581000 29.884860000  
1 43.483633000 40.754893000 32.227688000  
6 40.137795000 37.556804000 40.611053000  
6 39.280582000 37.923683000 39.412213000  
8 38.133661000 37.449709000 39.292671000  
6 39.309369000 37.633578000 41.900841000  
8 38.220431000 36.701744000 41.889750000  
1 40.483584000 36.523031000 40.480024000  
1 39.939129000 37.389880000 42.758943000  
1 38.919253000 38.652397000 42.040448000  
1 37.842252000 36.789820000 40.982440000  
7 39.815137000 38.774911000 38.509485000  
6 39.085409000 39.282796000 37.353638000  
6 39.134002000 40.820637000 37.259352000  
6 38.589560000 41.529008000 38.483410000  
6 37.228708000 41.454879000 38.813293000  
6 39.439022000 42.262807000 39.322667000  
6 36.730673000 42.090146000 39.951285000  
6 38.944280000 42.900840000 40.464296000  
6 37.587770000 42.814952000 40.782703000  
1 40.741076000 39.149868000 38.683282000  
1 38.059443000 38.923751000 37.457743000  
1 40.168019000 41.137492000 37.078919000  
1 38.563228000 41.108871000 36.366219000  
1 36.551254000 40.893533000 38.173146000  
1 40.495124000 42.343144000 39.075181000  
1 35.671673000 42.020976000 40.187530000  
1 39.619284000 43.467925000 41.100399000  
1 37.201506000 43.311774000 41.668816000  
6 46.601517000 54.289436000 38.876246000  
6 45.412096000 54.787903000 39.703453000  
8 45.566108000 55.240413000 40.833978000  
6 47.014528000 52.847794000 39.225496000  
6 46.102431000 51.781442000 38.611974000  
7 46.558457000 50.526219000 38.662398000  
8 44.995635000 52.077677000 38.118352000  
1 46.397235000 54.365846000 37.802967000  
1 48.044746000 52.660396000 38.898654000  
1 47.015860000 52.721219000 40.316041000  
1 47.510801000 50.283315000 38.951261000  
1 46.003169000 49.764877000 38.264387000  
7 44.193846000 54.701120000 39.081903000  
6 42.948068000 54.926826000 39.792447000  
6 42.069747000 53.689341000 40.066148000  
8 40.933370000 53.850138000 40.507395000  
1 44.175346000 54.118140000 38.252714000  
1 43.208759000 55.375821000 40.754863000  
7 42.639549000 52.487754000 39.805518000  
6 41.948760000 51.216777000 39.951444000  
6 41.785723000 50.502449000 38.589775000  
6 41.254124000 49.093360000 38.735156000  
6 39.885648000 48.860685000 38.935646000  
6 42.121970000 47.989529000 38.706816000  
6 39.392947000 47.564829000 39.105350000  
6 41.631619000 46.691261000 38.884582000  
6 40.265199000 46.473939000 39.083353000  
1 43.558681000 52.451195000 39.371327000  
1 40.979243000 51.423610000 40.410632000  
1 41.115554000 51.103231000 37.961604000  
1 42.763107000 50.486598000 38.094347000  
1 39.199032000 49.704916000 38.951425000  
1 43.186464000 48.137277000 38.532981000  
1 38.327310000 47.406216000 39.252155000  
1 42.322425000 45.852081000 38.867493000  
1 39.881760000 45.465193000 39.209827000  
6 41.085050000 50.534470000 31.514854000

6 40.480677000 49.330390000 30.789441000  
7 40.784766000 48.131422000 31.340930000  
8 39.785718000 49.477398000 29.785436000  
1 41.629008000 50.261762000 32.423761000  
1 40.280691000 51.232273000 31.770126000  
1 40.412551000 47.271609000 30.943746000  
1 41.352967000 48.062442000 32.180900000  
6 49.258550000 40.796443000 31.604524000  
6 48.712991000 40.693096000 33.032628000  
8 49.205782000 41.370132000 33.949700000  
6 48.236751000 40.642005000 30.462532000  
6 47.110833000 41.698241000 30.428132000  
6 47.639743000 43.094674000 30.067079000  
6 45.997779000 41.255410000 29.467999000  
1 49.772230000 41.760577000 31.545501000  
1 48.784860000 40.677487000 29.508682000  
1 47.782348000 39.644178000 30.503052000  
1 46.658900000 41.752108000 31.427367000  
1 48.402038000 43.446418000 30.772476000  
1 48.086125000 43.096929000 29.062418000  
1 46.826648000 43.829925000 30.070421000  
1 46.386355000 41.111251000 28.449162000  
1 45.553613000 40.317755000 29.817488000  
1 45.202263000 42.007670000 29.425027000  
7 47.728244000 39.798257000 33.229737000  
6 46.998279000 39.679158000 34.488272000  
6 45.855655000 38.657275000 34.327583000  
6 44.976436000 38.998536000 33.100730000  
8 45.495181000 38.813793000 31.974623000  
8 43.817324000 39.485472000 33.321681000  
1 47.226310000 39.386120000 32.437412000  
1 46.592839000 40.657491000 34.776983000  
1 46.285891000 37.659529000 34.176043000  
1 45.265059000 38.644212000 35.248361000  
6 50.898482000 44.279530000 34.219701000  
6 50.331187000 44.425090000 35.623138000  
8 50.645390000 45.394185000 36.336296000  
1 51.990011000 44.349558000 34.273980000  
1 50.549961000 45.119870000 33.608537000  
7 49.485798000 43.456608000 36.019114000  
6 48.875801000 43.443386000 37.348360000  
6 47.803494000 42.366234000 37.459877000  
1 49.294380000 42.681035000 35.384843000  
1 48.440706000 44.424872000 37.559768000  
1 48.219111000 41.370455000 37.259753000  
1 47.391925000 42.386029000 38.473430000  
1 46.986278000 42.541128000 36.751665000  
6 48.734307000 48.581625000 36.782375000  
6 49.406281000 48.516349000 38.153059000  
8 49.181506000 49.361712000 39.033271000  
6 47.721949000 47.435244000 36.535932000  
6 46.698275000 47.280675000 37.672954000  
8 47.005023000 46.486952000 38.612712000  
8 45.627677000 47.953706000 37.610855000  
1 48.234867000 49.550708000 36.712392000  
1 47.188402000 47.645743000 35.602910000  
1 48.269887000 46.498053000 36.415504000  
7 50.250828000 47.474216000 38.331042000  
6 50.835837000 47.140917000 39.619784000  
6 50.394179000 45.747726000 40.094790000  
6 51.088842000 45.355936000 41.395353000  
8 48.993746000 45.701331000 40.337313000  
1 50.359047000 46.787837000 37.581126000  
1 50.514717000 47.904149000 40.332869000  
1 50.664355000 45.025091000 39.307878000  
1 48.481871000 46.046625000 39.566693000  
1 50.851058000 46.077241000 42.185760000  
1 50.746979000 44.368951000 41.723338000  
1 52.176754000 45.320288000 41.265150000  
6 37.787345000 31.998285000 42.459897000  
6 37.685660000 31.667564000 40.964259000  
8 37.043223000 30.696727000 40.566753000  
6 37.720365000 33.486933000 42.829543000  
6 37.553815000 33.699958000 44.335784000  
8 38.923518000 34.114291000 42.373438000  
1 36.976447000 31.450053000 42.947926000  
1 36.858333000 33.938286000 42.313419000  
1 38.723784000 35.074626000 42.228283000  
1 38.390685000 33.245046000 44.879158000  
1 37.539268000 34.771848000 44.562243000  
1 36.618701000 33.257896000 44.701462000  
7 38.377349000 32.510872000 40.148375000  
6 38.412041000 32.384947000 38.701794000  
6 37.855391000 33.616476000 37.954930000  
6 36.357016000 33.825098000 38.245819000  
6 38.174990000 33.473027000 36.453675000  
6 35.786703000 35.146688000 37.714759000  
1 38.860827000 33.279656000 40.608512000  
1 37.833721000 31.489683000 38.453209000  
1 38.391203000 34.505864000 38.322515000  
1 35.791441000 32.976973000 37.831249000  
1 36.208682000 33.786027000 39.332670000  
1 37.829606000 34.357799000 35.893570000



|    |              |              |              |                  |              |              |              |  |
|----|--------------|--------------|--------------|------------------|--------------|--------------|--------------|--|
| 1  | 39.220528000 | 33.335137000 | 36.269342000 | 1                | 42.976567000 | 39.152355000 | 37.107865000 |  |
| 1  | 37.623188000 | 32.603861000 | 36.034070000 | 1                | 43.049533000 | 39.463246000 | 39.587036000 |  |
| 1  | 34.743401000 | 35.273138000 | 38.029283000 | 1                | 44.599718000 | 45.160070000 | 37.219848000 |  |
| 1  | 36.359732000 | 36.001434000 | 38.092378000 | 1                | 45.357959000 | 45.003976000 | 35.647924000 |  |
| 1  | 35.801908000 | 35.188974000 | 36.619194000 | 1                | 42.395416000 | 45.653360000 | 36.102067000 |  |
| 6  | 46.711639000 | 34.634013000 | 45.301191000 | 1                | 43.149556000 | 45.450221000 | 34.523713000 |  |
| 6  | 45.578368000 | 35.527559000 | 44.790180000 | 1                | 44.548606000 | 49.563568000 | 35.610266000 |  |
| 16 | 46.199068000 | 36.647835000 | 43.472122000 | 1                | 42.947131000 | 50.149576000 | 35.095288000 |  |
| 1  | 47.120005000 | 34.014940000 | 44.494880000 | 1                | 43.522819000 | 40.540643000 | 34.679445000 |  |
| 1  | 44.768221000 | 34.913923000 | 44.384306000 | 1                | 44.433171000 | 47.462613000 | 36.258101000 |  |
| 1  | 45.166038000 | 36.123664000 | 45.609854000 | 8                | 47.324927000 | 43.438056000 | 40.817904000 |  |
| 6  | 41.469623000 | 47.989108000 | 42.813990000 | 1                | 46.498506000 | 43.934907000 | 40.644046000 |  |
| 6  | 42.991207000 | 48.036891000 | 42.934758000 | 1                | 48.016387000 | 44.121907000 | 40.693829000 |  |
| 8  | 43.545223000 | 48.309187000 | 44.002224000 | 1                | 47.532127000 | 35.232102000 | 45.713565000 |  |
| 6  | 40.864212000 | 46.666225000 | 43.335656000 | 1                | 46.344604000 | 33.967168000 | 46.093422000 |  |
| 6  | 41.178200000 | 46.289458000 | 44.797720000 | 1                | 46.811326000 | 37.006681000 | 38.004172000 |  |
| 6  | 40.750589000 | 47.379716000 | 45.791052000 | 1                | 47.689948000 | 39.448624000 | 38.802726000 |  |
| 6  | 40.522692000 | 44.942507000 | 45.139518000 | 1                | 46.987224000 | 42.391922000 | 43.037792000 |  |
| 1  | 41.079643000 | 48.833489000 | 43.390929000 | 1                | 45.695605000 | 42.069400000 | 45.431055000 |  |
| 1  | 39.772345000 | 46.727661000 | 43.212287000 | 1                | 42.209348000 | 38.596572000 | 47.274928000 |  |
| 1  | 41.197884000 | 45.848375000 | 42.681262000 | 1                | 40.976350000 | 36.408014000 | 46.244808000 |  |
| 1  | 42.265383000 | 46.173975000 | 44.889678000 | 1                | 41.481758000 | 33.582192000 | 41.852127000 |  |
| 1  | 41.340055000 | 48.289011000 | 45.644396000 | 1                | 43.180851000 | 33.642923000 | 39.723829000 |  |
| 1  | 39.685110000 | 47.626724000 | 45.678562000 | 1                | 51.932840000 | 47.167290000 | 39.549493000 |  |
| 1  | 40.905421000 | 47.045036000 | 46.824774000 | 1                | 49.501992000 | 48.537822000 | 35.999491000 |  |
| 1  | 40.846682000 | 44.151715000 | 44.451111000 | 1                | 45.486952000 | 48.165177000 | 40.846112000 |  |
| 1  | 40.778130000 | 44.623767000 | 46.157788000 | 1                | 41.153034000 | 48.129039000 | 41.774174000 |  |
| 1  | 39.427390000 | 45.008577000 | 45.077917000 | 1                | 41.035813000 | 38.173772000 | 40.712772000 |  |
| 7  | 43.675715000 | 47.745155000 | 41.792266000 | 1                | 39.498943000 | 38.851756000 | 36.432315000 |  |
| 6  | 45.126355000 | 47.639839000 | 41.738172000 | 1                | 39.448943000 | 32.209282000 | 38.379030000 |  |
| 6  | 45.653085000 | 46.192786000 | 41.710829000 | 1                | 38.734196000 | 31.593772000 | 42.845855000 |  |
| 6  | 45.133411000 | 45.349927000 | 42.868627000 | 1                | 40.912968000 | 42.880003000 | 29.857290000 |  |
| 8  | 45.289476000 | 45.529963000 | 40.492008000 | 1                | 40.969602000 | 45.862549000 | 33.544705000 |  |
| 1  | 43.155741000 | 47.465207000 | 40.970814000 | 1                | 41.763533000 | 51.057652000 | 30.831745000 |  |
| 1  | 45.510534000 | 48.154815000 | 42.622680000 | 1                | 42.517309000 | 50.570921000 | 40.632987000 |  |
| 1  | 46.750202000 | 46.258190000 | 41.771906000 | 1                | 42.314648000 | 55.641952000 | 39.254933000 |  |
| 1  | 45.807370000 | 45.958741000 | 39.759866000 | 1                | 47.434029000 | 54.957995000 | 39.115186000 |  |
| 1  | 45.602246000 | 44.363130000 | 42.851204000 | 1                | 49.655778000 | 43.277090000 | 38.104342000 |  |
| 1  | 45.342137000 | 45.835081000 | 43.827945000 | 1                | 50.607144000 | 43.338410000 | 33.747515000 |  |
| 1  | 44.050117000 | 45.214880000 | 42.780382000 | 1                | 47.683664000 | 39.370821000 | 35.286864000 |  |
| 8  | 43.065213000 | 38.624119000 | 41.750124000 | 1                | 50.038037000 | 40.027576000 | 31.499728000 |  |
| 26 | 44.411212000 | 37.890971000 | 42.573907000 | <b>4TS1HA,II</b> |              |              |              |  |
| 7  | 43.343151000 | 37.687961000 | 44.273665000 | 6                | 40.290528000 | 45.164631000 | 33.305191000 |  |
| 7  | 45.184567000 | 39.595241000 | 43.245939000 | 6                | 40.552178000 | 44.592289000 | 31.916501000 |  |
| 7  | 43.635800000 | 36.127410000 | 41.900993000 | 8                | 40.164578000 | 45.149263000 | 30.882706000 |  |
| 6  | 42.010234000 | 35.701235000 | 43.686017000 | 6                | 38.889048000 | 45.782530000 | 33.468773000 |  |
| 6  | 44.139400000 | 39.678705000 | 45.466703000 | 6                | 38.833768000 | 46.587876000 | 34.782475000 |  |
| 6  | 46.595112000 | 40.203491000 | 41.323025000 | 6                | 37.795215000 | 44.708201000 | 33.376883000 |  |
| 6  | 44.931580000 | 35.903372000 | 39.834060000 | 6                | 37.542463000 | 47.386105000 | 34.996644000 |  |
| 6  | 42.369728000 | 36.750172000 | 44.524641000 | 1                | 40.456963000 | 44.395635000 | 34.072427000 |  |
| 6  | 44.969875000 | 40.175628000 | 44.475093000 | 1                | 38.750799000 | 46.482467000 | 32.634518000 |  |
| 6  | 46.394422000 | 39.045484000 | 40.582881000 | 1                | 38.984893000 | 45.908215000 | 35.634827000 |  |
| 6  | 43.964405000 | 35.484511000 | 40.739532000 | 1                | 39.684652000 | 47.280924000 | 34.793362000 |  |
| 6  | 41.769843000 | 37.003469000 | 45.810419000 | 1                | 36.791419000 | 45.144977000 | 33.427889000 |  |
| 6  | 45.706957000 | 41.414454000 | 44.568679000 | 1                | 37.866905000 | 44.160447000 | 32.430625000 |  |
| 6  | 47.015545000 | 38.771459000 | 39.309885000 | 1                | 37.885731000 | 43.982985000 | 34.198011000 |  |
| 6  | 43.124375000 | 34.321477000 | 40.566115000 | 1                | 36.664633000 | 46.735805000 | 35.091503000 |  |
| 6  | 42.391603000 | 38.100957000 | 46.329432000 | 1                | 37.608732000 | 47.984952000 | 35.912714000 |  |
| 6  | 46.361327000 | 41.580566000 | 43.386787000 | 1                | 37.359631000 | 48.072883000 | 34.160254000 |  |
| 6  | 46.574804000 | 37.546682000 | 38.912417000 | 7                | 41.260001000 | 43.433435000 | 31.885378000 |  |
| 6  | 42.276962000 | 34.282422000 | 41.632596000 | 6                | 41.756103000 | 42.843916000 | 30.651064000 |  |
| 6  | 43.359377000 | 38.531926000 | 45.352409000 | 6                | 42.295568000 | 41.448521000 | 30.944441000 |  |
| 6  | 46.046912000 | 40.429229000 | 42.575739000 | 8                | 43.301798000 | 41.569747000 | 31.926540000 |  |
| 6  | 45.666469000 | 37.076062000 | 39.930879000 | 1                | 41.707516000 | 43.095012000 | 32.728840000 |  |
| 6  | 42.615532000 | 35.412894000 | 42.468101000 | 1                | 42.554755000 | 43.465861000 | 30.221492000 |  |
| 7  | 45.589547000 | 37.997952000 | 40.946543000 | 1                | 41.471707000 | 40.803921000 | 31.292798000 |  |
| 1  | 41.197256000 | 35.053439000 | 43.999927000 | 1                | 42.684820000 | 41.012912000 | 30.009208000 |  |
| 1  | 44.054497000 | 40.253400000 | 46.383927000 | 1                | 43.456451000 | 40.686812000 | 32.359357000 |  |
| 1  | 47.218279000 | 40.991207000 | 40.911501000 | 6                | 40.075288000 | 37.581331000 | 40.673319000 |  |
| 1  | 45.093290000 | 35.287236000 | 38.954769000 | 6                | 39.195169000 | 37.969262000 | 39.498136000 |  |
| 6  | 43.890394000 | 42.608746000 | 35.023676000 | 8                | 38.063963000 | 37.461268000 | 39.364839000 |  |
| 6  | 43.740035000 | 42.526718000 | 37.267480000 | 6                | 39.261759000 | 37.547136000 | 41.973214000 |  |
| 6  | 43.755246000 | 42.690194000 | 38.664930000 | 8                | 38.202834000 | 36.581948000 | 41.917248000 |  |
| 6  | 43.152123000 | 40.134854000 | 37.538989000 | 1                | 40.464671000 | 36.572600000 | 40.481195000 |  |
| 6  | 43.430892000 | 41.238353000 | 36.722601000 | 1                | 39.912017000 | 37.271353000 | 42.806391000 |  |
| 6  | 44.028335000 | 43.392419000 | 36.152280000 | 1                | 38.840697000 | 38.541019000 | 42.183607000 |  |
| 6  | 43.457291000 | 41.586258000 | 39.457095000 | 1                | 37.817466000 | 36.705547000 | 41.016873000 |  |
| 6  | 43.162026000 | 40.311944000 | 38.919482000 | 7                | 39.696484000 | 38.868894000 | 38.624012000 |  |
| 7  | 43.517783000 | 41.326500000 | 35.357214000 | 6                | 38.961820000 | 39.361500000 | 37.464353000 |  |
| 6  | 44.412739000 | 44.848321000 | 36.185828000 | 6                | 38.999887000 | 40.897812000 | 37.353389000 |  |
| 6  | 43.343207000 | 45.755919000 | 35.555767000 | 6                | 38.409769000 | 41.617384000 | 38.549146000 |  |
| 7  | 43.772677000 | 47.148778000 | 35.540024000 | 6                | 37.033849000 | 41.564464000 | 38.814214000 |  |
| 6  | 43.230904000 | 48.061222000 | 34.708932000 | 6                | 39.229577000 | 42.341196000 | 39.425178000 |  |
| 8  | 42.353792000 | 47.783625000 | 33.874758000 | 6                | 36.492200000 | 42.211739000 | 39.925153000 |  |
| 6  | 43.772869000 | 49.475276000 | 34.845225000 | 6                | 38.691669000 | 42.990325000 | 40.540408000 |  |
| 8  | 43.552322000 | 41.776537000 | 40.833335000 | 6                | 37.320453000 | 42.926282000 | 40.794029000 |  |
| 6  | 42.697060000 | 41.118270000 | 41.661538000 | 1                | 40.611854000 | 39.264941000 | 38.805458000 |  |
| 1  | 44.033097000 | 42.856712000 | 33.979220000 | 1                | 37.938153000 | 38.996403000 | 37.571163000 |  |
| 1  | 44.022825000 | 43.628315000 | 39.145327000 | 1                | 40.036427000 | 41.221330000 | 37.200759000 |  |
| 1  | 44.174497000 | 49.795804000 | 33.877808000 | 1                | 38.454634000 | 41.168903000 | 36.439300000 |  |
| 1  | 42.925642000 | 39.827973000 | 41.728574000 | 1                | 36.379326000 | 41.011667000 | 38.143224000 |  |
| 1  | 41.656675000 | 41.098544000 | 41.313525000 | 1                | 40.297422000 | 42.402758000 | 39.228739000 |  |
| 1  | 42.841261000 | 41.461665000 | 42.684943000 |                  |              |              |              |  |

|   |              |              |              |    |              |              |              |
|---|--------------|--------------|--------------|----|--------------|--------------|--------------|
| 1 | 35.422117000 | 42.160039000 | 40.111006000 | 8  | 45.658196000 | 47.940376000 | 37.600031000 |
| 1 | 39.346426000 | 43.545228000 | 41.207398000 | 1  | 48.337365000 | 49.511245000 | 36.737997000 |
| 1 | 36.900181000 | 43.431973000 | 41.659560000 | 1  | 47.238505000 | 47.655588000 | 35.607672000 |
| 6 | 46.695427000 | 54.244497000 | 38.940482000 | 1  | 48.282657000 | 46.464762000 | 36.405920000 |
| 6 | 45.505746000 | 54.749842000 | 39.763541000 | 7  | 50.267146000 | 47.377565000 | 38.384764000 |
| 8 | 45.659453000 | 55.212815000 | 40.890065000 | 6  | 50.823110000 | 47.031594000 | 39.682919000 |
| 6 | 47.087620000 | 52.793284000 | 39.274546000 | 6  | 50.371344000 | 45.635641000 | 40.139681000 |
| 6 | 46.170362000 | 51.744199000 | 38.638919000 | 6  | 51.039014000 | 45.237167000 | 41.452570000 |
| 7 | 46.613479000 | 50.484036000 | 38.677517000 | 8  | 48.966776000 | 45.581639000 | 40.350868000 |
| 8 | 45.071091000 | 52.056782000 | 38.138434000 | 1  | 50.381197000 | 46.697819000 | 37.629129000 |
| 1 | 46.499917000 | 54.336168000 | 37.866677000 | 1  | 50.488304000 | 47.790362000 | 40.394544000 |
| 1 | 48.118738000 | 52.598418000 | 38.954953000 | 1  | 50.661850000 | 44.917422000 | 39.355529000 |
| 1 | 47.077553000 | 52.651894000 | 40.363266000 | 1  | 48.470889000 | 45.955588000 | 39.583224000 |
| 1 | 47.558821000 | 50.226627000 | 38.976380000 | 1  | 50.783908000 | 45.954026000 | 42.241594000 |
| 1 | 46.052642000 | 49.732923000 | 38.267314000 | 1  | 50.690630000 | 44.248274000 | 41.767832000 |
| 7 | 44.288343000 | 54.654868000 | 39.142536000 | 1  | 52.129504000 | 45.202608000 | 41.345386000 |
| 6 | 43.041558000 | 54.886334000 | 39.849029000 | 6  | 37.740785000 | 31.881394000 | 42.304570000 |
| 6 | 42.150281000 | 53.655400000 | 40.109230000 | 6  | 37.644463000 | 31.615516000 | 40.795416000 |
| 8 | 41.013329000 | 53.825532000 | 40.545621000 | 8  | 37.004285000 | 30.661755000 | 40.355150000 |
| 1 | 44.272941000 | 54.066208000 | 38.316885000 | 6  | 37.690913000 | 33.353463000 | 42.738159000 |
| 1 | 43.301538000 | 55.326627000 | 40.815704000 | 6  | 37.520216000 | 33.503595000 | 44.251489000 |
| 7 | 42.707618000 | 52.448841000 | 39.843444000 | 8  | 38.904103000 | 33.983535000 | 42.314231000 |
| 6 | 41.996998000 | 51.186427000 | 39.973257000 | 1  | 36.920679000 | 31.322210000 | 42.763961000 |
| 6 | 41.826259000 | 50.490157000 | 38.603702000 | 1  | 36.837196000 | 33.838224000 | 42.239015000 |
| 6 | 41.245990000 | 49.098093000 | 38.727793000 | 1  | 38.714908000 | 34.950973000 | 42.202546000 |
| 6 | 39.871452000 | 48.914019000 | 38.938084000 | 1  | 38.347794000 | 33.013557000 | 44.778500000 |
| 6 | 42.069839000 | 47.962497000 | 38.663703000 | 1  | 37.519950000 | 34.564885000 | 44.523530000 |
| 6 | 39.329718000 | 47.634925000 | 39.081891000 | 1  | 36.577211000 | 33.059552000 | 44.593789000 |
| 6 | 41.529526000 | 46.680348000 | 38.811674000 | 7  | 38.338193000 | 32.493075000 | 40.018378000 |
| 6 | 40.157754000 | 46.511578000 | 39.020503000 | 6  | 37.837853000 | 32.428737000 | 38.567779000 |
| 1 | 43.627043000 | 52.405014000 | 39.411041000 | 6  | 37.824680000 | 33.690946000 | 37.871949000 |
| 1 | 41.029309000 | 51.404592000 | 40.430966000 | 6  | 36.323092000 | 33.881313000 | 38.158899000 |
| 1 | 41.182092000 | 51.118356000 | 37.974946000 | 6  | 38.130775000 | 33.616005000 | 36.368427000 |
| 1 | 42.806914000 | 50.447478000 | 38.116254000 | 6  | 35.751399000 | 35.222069000 | 37.679976000 |
| 1 | 39.218766000 | 49.783885000 | 38.981442000 | 1  | 38.822378000 | 33.240263000 | 40.512265000 |
| 1 | 43.138119000 | 48.074768000 | 38.485329000 | 1  | 37.801914000 | 31.544588000 | 38.278704000 |
| 1 | 38.260295000 | 47.514702000 | 39.237733000 | 1  | 38.354222000 | 34.564417000 | 38.284057000 |
| 1 | 42.181055000 | 45.812089000 | 38.758024000 | 1  | 35.764631000 | 33.049173000 | 37.704123000 |
| 1 | 39.737375000 | 45.515216000 | 39.126898000 | 1  | 36.166074000 | 33.795672000 | 39.241487000 |
| 6 | 41.209652000 | 50.519619000 | 31.318766000 | 1  | 37.815206000 | 34.524561000 | 35.846187000 |
| 6 | 40.606546000 | 49.297387000 | 30.623171000 | 1  | 39.205251000 | 33.488953000 | 36.187489000 |
| 7 | 40.896797000 | 48.114738000 | 31.215949000 | 1  | 37.611758000 | 32.765681000 | 35.905233000 |
| 8 | 39.924666000 | 49.416676000 | 29.606553000 | 1  | 34.705136000 | 35.330828000 | 37.991319000 |
| 1 | 41.742618000 | 50.270500000 | 32.240841000 | 1  | 36.317999000 | 36.062094000 | 38.098011000 |
| 1 | 40.406058000 | 51.228325000 | 31.544982000 | 1  | 35.774758000 | 35.310839000 | 36.587327000 |
| 1 | 40.522037000 | 47.244488000 | 30.844522000 | 6  | 47.660023000 | 35.943945000 | 45.559276000 |
| 1 | 41.452254000 | 48.072313000 | 32.065785000 | 6  | 46.350138000 | 36.546067000 | 45.047359000 |
| 6 | 49.219882000 | 40.642911000 | 31.688714000 | 16 | 46.314125000 | 36.643488000 | 43.222725000 |
| 6 | 48.685161000 | 40.601475000 | 33.124148000 | 1  | 47.803879000 | 34.924970000 | 45.183103000 |
| 8 | 49.197779000 | 41.304328000 | 34.010825000 | 1  | 45.484664000 | 35.967904000 | 45.388137000 |
| 6 | 48.187361000 | 40.454184000 | 30.561591000 | 1  | 46.221524000 | 37.565881000 | 45.431064000 |
| 6 | 47.075449000 | 41.523123000 | 30.490289000 | 6  | 41.426562000 | 47.789292000 | 42.765942000 |
| 6 | 47.620675000 | 42.895883000 | 30.067902000 | 6  | 42.935988000 | 47.972074000 | 42.909999000 |
| 6 | 45.950320000 | 41.055310000 | 29.556424000 | 8  | 43.449545000 | 48.296497000 | 43.982893000 |
| 1 | 49.743507000 | 41.598215000 | 31.587672000 | 6  | 40.947582000 | 46.384701000 | 43.197259000 |
| 1 | 48.728510000 | 40.441851000 | 29.603120000 | 6  | 41.291938000 | 45.951726000 | 44.636553000 |
| 1 | 47.720304000 | 39.465092000 | 30.647541000 | 6  | 40.763389000 | 46.936620000 | 45.689730000 |
| 1 | 46.630587000 | 41.624730000 | 31.488891000 | 6  | 40.765695000 | 44.531153000 | 44.892340000 |
| 1 | 48.393644000 | 43.265338000 | 30.752357000 | 1  | 40.954089000 | 48.556389000 | 43.387148000 |
| 1 | 48.058894000 | 42.850705000 | 29.060620000 | 1  | 39.855105000 | 46.350035000 | 43.067736000 |
| 1 | 46.817902000 | 43.642075000 | 30.047443000 | 1  | 41.360727000 | 45.643801000 | 42.498584000 |
| 1 | 46.331658000 | 40.856188000 | 28.544074000 | 1  | 42.385372000 | 45.931382000 | 44.729442000 |
| 1 | 45.491495000 | 40.143349000 | 29.951943000 | 1  | 41.264240000 | 47.904716000 | 45.600091000 |
| 1 | 45.167802000 | 41.818506000 | 29.480335000 | 1  | 39.679476000 | 47.088435000 | 45.584787000 |
| 7 | 47.688531000 | 39.730517000 | 33.361813000 | 1  | 40.947862000 | 46.557489000 | 46.703093000 |
| 6 | 46.970051000 | 39.664123000 | 34.630568000 | 1  | 41.158014000 | 43.819349000 | 44.154868000 |
| 6 | 45.818514000 | 38.645813000 | 34.518371000 | 1  | 41.053966000 | 44.173762000 | 45.888870000 |
| 6 | 44.930269000 | 38.949841000 | 33.287359000 | 1  | 39.668738000 | 44.498652000 | 44.833581000 |
| 8 | 45.439598000 | 38.720317000 | 32.164302000 | 7  | 43.657915000 | 47.734618000 | 41.777626000 |
| 8 | 43.778537000 | 39.453452000 | 33.501466000 | 6  | 45.113116000 | 47.733525000 | 41.740602000 |
| 1 | 47.173238000 | 39.296177000 | 32.589752000 | 6  | 45.734371000 | 46.324816000 | 41.741114000 |
| 1 | 46.573823000 | 40.655069000 | 34.886784000 | 6  | 45.322102000 | 45.492976000 | 42.949935000 |
| 1 | 46.239942000 | 37.639680000 | 34.398994000 | 8  | 45.358861000 | 45.600451000 | 40.563492000 |
| 1 | 45.235426000 | 38.672199000 | 35.443749000 | 1  | 43.174522000 | 47.395003000 | 40.956212000 |
| 6 | 50.887755000 | 44.219541000 | 34.206765000 | 1  | 45.452596000 | 48.291243000 | 42.617567000 |
| 6 | 50.333279000 | 44.392927000 | 35.612061000 | 1  | 46.826867000 | 46.459811000 | 41.749620000 |
| 8 | 50.661099000 | 45.372040000 | 36.305282000 | 1  | 45.858714000 | 45.997355000 | 39.801574000 |
| 1 | 51.979693000 | 44.290562000 | 34.249629000 | 1  | 45.873631000 | 44.549430000 | 42.951832000 |
| 1 | 50.533408000 | 45.047657000 | 33.582390000 | 1  | 45.517786000 | 46.033312000 | 43.882022000 |
| 7 | 49.482147000 | 43.438358000 | 36.029984000 | 1  | 44.252529000 | 45.263203000 | 42.902113000 |
| 6 | 48.884437000 | 43.452223000 | 37.364271000 | 8  | 42.903033000 | 38.598199000 | 41.897741000 |
| 6 | 47.773358000 | 42.417035000 | 37.492262000 | 26 | 44.257665000 | 37.679550000 | 42.484808000 |
| 1 | 49.284213000 | 42.650205000 | 35.413149000 | 7  | 43.332951000 | 37.313929000 | 44.235940000 |
| 1 | 48.487196000 | 44.449450000 | 37.573476000 | 7  | 45.060248000 | 39.384940000 | 43.271878000 |
| 1 | 48.151071000 | 41.406763000 | 37.289178000 | 7  | 43.482709000 | 36.001422000 | 41.712134000 |
| 1 | 47.373936000 | 42.453310000 | 38.510733000 | 6  | 42.032554000 | 35.335786000 | 43.571694000 |
| 1 | 46.954121000 | 42.620684000 | 36.794333000 | 6  | 44.079843000 | 39.283705000 | 45.511186000 |
| 6 | 48.803915000 | 48.526187000 | 36.813085000 | 6  | 46.323492000 | 40.175345000 | 41.320637000 |
| 6 | 49.445039000 | 48.436124000 | 38.196903000 | 6  | 44.664201000 | 35.972160000 | 39.568073000 |
| 8 | 49.217009000 | 49.278656000 | 39.079051000 | 6  | 42.416539000 | 36.320480000 | 44.478482000 |
| 6 | 47.759740000 | 47.414252000 | 36.540040000 | 6  | 44.856880000 | 39.891168000 | 44.531522000 |
| 6 | 46.727649000 | 47.266647000 | 37.670115000 | 6  | 46.112597000 | 39.068925000 | 40.506521000 |
| 8 | 47.030127000 | 46.477261000 | 38.615023000 | 6  | 43.751988000 | 35.460678000 | 40.484772000 |

|   |              |              |              |   |              |              |              |
|---|--------------|--------------|--------------|---|--------------|--------------|--------------|
| 6 | 41.873251000 | 36.464174000 | 45.805309000 | 1 | 39.006706000 | 47.436529000 | 32.196519000 |
| 6 | 45.539381000 | 41.159463000 | 44.674965000 | 1 | 36.785389000 | 44.314012000 | 32.513106000 |
| 6 | 46.665785000 | 38.922693000 | 39.182916000 | 1 | 37.931627000 | 43.293286000 | 31.637469000 |
| 6 | 42.942635000 | 34.281703000 | 40.267985000 | 1 | 38.320332000 | 43.863711000 | 33.275767000 |
| 6 | 42.460464000 | 37.566637000 | 46.354619000 | 1 | 36.381812000 | 46.374612000 | 33.413636000 |
| 6 | 46.141740000 | 41.421285000 | 43.482568000 | 1 | 36.988614000 | 48.031999000 | 33.480052000 |
| 6 | 46.230255000 | 37.726038000 | 38.701707000 | 1 | 36.483584000 | 47.336271000 | 31.930482000 |
| 6 | 42.178050000 | 34.119792000 | 41.382748000 | 7 | 41.326093000 | 43.333400000 | 30.341376000 |
| 6 | 43.352736000 | 38.103290000 | 45.358462000 | 6 | 41.728154000 | 42.384664000 | 29.315441000 |
| 6 | 45.845137000 | 40.301938000 | 42.618536000 | 6 | 42.421165000 | 41.175173000 | 29.929734000 |
| 6 | 45.389357000 | 37.147893000 | 39.721947000 | 8 | 43.562276000 | 41.619486000 | 30.630471000 |
| 6 | 42.539656000 | 35.190114000 | 42.286595000 | 1 | 41.978925000 | 43.471917000 | 31.101252000 |
| 7 | 45.350611000 | 37.966954000 | 40.822196000 | 1 | 42.414132000 | 42.862704000 | 28.600336000 |
| 1 | 41.263986000 | 34.633765000 | 43.880667000 | 1 | 41.715006000 | 40.650425000 | 30.595432000 |
| 1 | 43.991149000 | 39.797465000 | 46.464277000 | 1 | 42.688869000 | 40.477117000 | 29.117647000 |
| 1 | 46.895934000 | 41.011794000 | 40.928132000 | 1 | 43.969363000 | 40.825749000 | 31.073265000 |
| 1 | 44.787452000 | 35.433058000 | 38.633320000 | 6 | 41.397681000 | 36.183367000 | 38.754383000 |
| 6 | 43.914785000 | 42.630835000 | 35.059161000 | 6 | 40.073696000 | 36.952410000 | 38.700412000 |
| 6 | 43.688857000 | 42.725854000 | 37.296503000 | 8 | 39.027276000 | 36.424063000 | 39.069905000 |
| 6 | 43.650190000 | 43.007850000 | 38.674625000 | 6 | 42.675669000 | 36.985791000 | 38.982683000 |
| 6 | 43.045788000 | 40.380557000 | 37.742523000 | 8 | 42.709289000 | 37.633742000 | 40.258218000 |
| 6 | 43.370127000 | 41.405997000 | 36.845683000 | 1 | 41.284273000 | 35.431891000 | 39.540838000 |
| 6 | 44.037601000 | 43.494251000 | 36.129647000 | 1 | 43.532625000 | 36.310607000 | 38.976880000 |
| 6 | 43.309019000 | 41.983029000 | 39.548521000 | 1 | 42.839218000 | 37.717413000 | 38.179670000 |
| 6 | 43.014775000 | 40.673706000 | 39.104911000 | 1 | 41.981998000 | 38.277160000 | 40.305710000 |
| 7 | 43.501409000 | 41.386645000 | 35.477637000 | 7 | 40.115682000 | 38.228188000 | 38.209779000 |
| 6 | 44.459112000 | 44.938305000 | 36.081152000 | 6 | 38.883318000 | 38.948761000 | 37.888070000 |
| 6 | 43.386983000 | 45.857351000 | 35.473460000 | 6 | 39.086215000 | 40.468467000 | 37.806033000 |
| 7 | 43.831612000 | 47.246119000 | 35.460065000 | 6 | 39.330408000 | 41.168722000 | 39.129795000 |
| 6 | 43.304154000 | 48.167861000 | 34.630618000 | 6 | 38.350657000 | 41.157411000 | 40.134471000 |
| 8 | 42.431372000 | 47.905197000 | 33.787123000 | 6 | 40.513050000 | 41.882163000 | 39.358523000 |
| 6 | 43.856661000 | 49.576902000 | 34.781053000 | 6 | 38.551417000 | 41.840139000 | 41.334710000 |
| 8 | 43.347723000 | 42.300984000 | 40.902504000 | 6 | 40.720649000 | 42.574892000 | 40.556395000 |
| 6 | 42.514267000 | 41.671349000 | 41.764834000 | 6 | 39.736794000 | 42.551378000 | 41.547359000 |
| 1 | 44.091286000 | 42.797018000 | 34.003725000 | 1 | 40.966411000 | 38.563801000 | 37.773882000 |
| 1 | 43.918401000 | 43.977471000 | 39.086093000 | 1 | 38.152238000 | 38.685894000 | 38.655460000 |
| 1 | 44.285693000 | 49.894434000 | 33.824378000 | 1 | 39.906928000 | 40.692213000 | 37.111768000 |
| 1 | 43.035411000 | 39.557669000 | 42.072530000 | 1 | 38.181031000 | 40.879889000 | 37.338235000 |
| 1 | 41.536857000 | 41.367624000 | 41.392561000 | 1 | 37.417811000 | 40.620090000 | 39.972814000 |
| 1 | 42.625827000 | 42.038672000 | 42.779201000 | 1 | 41.276661000 | 41.918707000 | 38.586374000 |
| 1 | 42.868907000 | 39.366468000 | 37.391776000 | 1 | 37.778139000 | 41.825260000 | 42.099486000 |
| 1 | 42.856576000 | 39.884216000 | 39.833395000 | 1 | 41.639189000 | 43.138459000 | 40.702354000 |
| 1 | 44.702964000 | 45.281688000 | 37.092797000 | 1 | 39.891578000 | 43.091398000 | 42.478005000 |
| 1 | 45.380345000 | 45.047788000 | 35.492722000 | 6 | 46.907845000 | 52.772816000 | 39.298209000 |
| 1 | 42.448018000 | 45.763162000 | 36.036136000 | 6 | 45.743842000 | 53.738807000 | 39.541694000 |
| 1 | 43.172772000 | 45.559075000 | 34.443612000 | 8 | 45.694990000 | 54.440805000 | 40.547111000 |
| 1 | 44.613938000 | 49.659194000 | 35.565284000 | 6 | 46.690782000 | 51.388366000 | 39.940849000 |
| 1 | 43.030995000 | 50.258420000 | 35.010564000 | 6 | 45.774134000 | 50.463750000 | 39.133708000 |
| 1 | 43.493402000 | 40.561011000 | 34.853967000 | 7 | 45.781889000 | 49.176024000 | 39.483404000 |
| 1 | 44.487881000 | 47.547376000 | 36.187600000 | 8 | 45.045518000 | 50.906099000 | 38.218382000 |
| 8 | 47.206547000 | 43.375643000 | 40.913156000 | 1 | 47.104224000 | 52.654647000 | 38.227118000 |
| 1 | 46.411085000 | 43.923415000 | 40.741134000 | 1 | 47.656198000 | 50.887033000 | 40.081462000 |
| 1 | 47.933590000 | 44.016460000 | 40.768778000 | 1 | 46.266502000 | 51.509981000 | 40.946301000 |
| 1 | 48.519314000 | 36.544381000 | 45.242764000 | 1 | 46.446162000 | 48.764826000 | 40.144990000 |
| 1 | 47.654293000 | 35.901734000 | 46.656451000 | 1 | 45.226461000 | 48.499452000 | 38.948854000 |
| 1 | 46.425666000 | 37.276567000 | 37.736238000 | 7 | 44.789476000 | 53.757263000 | 38.557349000 |
| 1 | 47.291729000 | 39.660711000 | 38.699818000 | 6 | 43.509426000 | 54.412698000 | 38.755485000 |
| 1 | 46.724770000 | 42.275467000 | 43.162565000 | 6 | 42.324794000 | 53.523483000 | 39.190660000 |
| 1 | 45.529698000 | 41.765613000 | 45.572449000 | 8 | 41.235290000 | 54.045897000 | 39.417435000 |
| 1 | 42.297018000 | 38.000389000 | 47.333448000 | 1 | 44.839782000 | 52.982408000 | 37.902911000 |
| 1 | 41.131972000 | 35.806214000 | 46.241451000 | 1 | 43.647482000 | 55.166183000 | 39.534014000 |
| 1 | 41.427136000 | 33.371028000 | 41.596225000 | 7 | 42.586828000 | 52.197586000 | 39.288619000 |
| 1 | 42.964678000 | 33.676479000 | 39.370149000 | 6 | 41.609005000 | 51.201969000 | 39.694988000 |
| 1 | 51.921648000 | 47.056350000 | 39.637750000 | 6 | 41.406810000 | 50.119579000 | 38.611803000 |
| 1 | 49.585395000 | 48.460092000 | 36.045720000 | 6 | 40.627617000 | 48.928583000 | 39.128255000 |
| 1 | 45.442102000 | 48.265986000 | 40.840508000 | 6 | 39.254582000 | 49.031561000 | 39.398011000 |
| 1 | 41.108823000 | 47.961927000 | 41.731409000 | 6 | 41.270128000 | 47.706807000 | 39.384462000 |
| 1 | 40.946074000 | 38.230666000 | 40.805622000 | 6 | 38.541393000 | 47.947458000 | 39.913558000 |
| 1 | 39.378598000 | 38.924322000 | 36.547022000 | 6 | 40.559376000 | 46.620625000 | 39.905993000 |
| 1 | 39.416894000 | 32.267357000 | 38.242312000 | 6 | 39.193003000 | 46.739131000 | 40.172813000 |
| 1 | 38.680448000 | 31.448915000 | 42.677732000 | 1 | 43.500372000 | 51.846804000 | 39.013925000 |
| 1 | 40.941563000 | 42.806402000 | 29.920770000 | 1 | 40.677851000 | 51.730531000 | 39.911892000 |
| 1 | 41.043378000 | 45.946347000 | 33.474282000 | 1 | 40.900663000 | 50.576076000 | 37.750901000 |
| 1 | 41.897402000 | 51.019260000 | 30.627306000 | 1 | 42.392459000 | 49.790122000 | 38.264106000 |
| 1 | 42.551933000 | 50.524273000 | 40.650066000 | 1 | 38.738860000 | 49.968839000 | 39.196206000 |
| 1 | 42.416232000 | 55.610761000 | 39.314265000 | 1 | 42.328426000 | 47.583925000 | 39.157372000 |
| 1 | 47.534405000 | 54.899484000 | 39.193468000 | 1 | 37.476057000 | 48.047113000 | 40.109890000 |
| 1 | 49.664777000 | 43.260445000 | 38.114144000 | 1 | 41.086323000 | 45.694018000 | 40.111596000 |
| 1 | 50.591890000 | 43.269418000 | 33.755871000 | 1 | 38.642305000 | 45.890000000 | 40.569880000 |
| 1 | 47.662090000 | 39.380418000 | 35.432888000 | 6 | 40.938788000 | 50.375677000 | 31.038803000 |
| 1 | 49.990489000 | 39.862162000 | 31.608662000 | 6 | 41.708013000 | 49.526963000 | 30.030054000 |
| 6 | 40.002997000 | 45.098991000 | 31.392018000 | 7 | 42.398760000 | 48.489833000 | 30.579863000 |
| 6 | 40.185432000 | 44.074193000 | 30.268873000 | 8 | 41.681506000 | 49.761822000 | 28.825858000 |
| 8 | 39.370712000 | 43.952407000 | 29.353026000 | 1 | 41.170000000 | 50.120746000 | 32.077220000 |
| 6 | 38.528516000 | 45.384999000 | 31.721832000 | 1 | 39.864887000 | 50.235977000 | 30.871806000 |
| 6 | 38.420430000 | 46.619514000 | 32.638913000 | 1 | 42.930552000 | 47.903204000 | 29.951498000 |
| 6 | 37.851056000 | 44.143306000 | 32.322606000 | 1 | 42.492852000 | 48.335132000 | 31.584792000 |
| 6 | 36.988990000 | 47.114453000 | 32.879638000 | 6 | 49.898827000 | 41.522341000 | 31.891008000 |
| 1 | 40.541594000 | 44.778472000 | 32.295009000 | 6 | 49.178919000 | 40.878191000 | 33.080826000 |
| 1 | 38.031694000 | 45.612415000 | 30.769093000 | 8 | 49.484971000 | 41.189720000 | 34.244223000 |
| 1 | 38.897950000 | 46.398552000 | 33.604611000 | 6 | 49.087771000 | 41.691274000 | 30.592839000 |
| 6 |              |              |              | 6 | 47.849644000 | 42.610402000 | 30.694209000 |
| 6 |              |              |              | 6 | 48.242217000 | 44.085276000 | 30.870430000 |

## 2IM1HA,II

|    |              |              |              |    |              |              |              |
|----|--------------|--------------|--------------|----|--------------|--------------|--------------|
| 6  | 46.936539000 | 42.414262000 | 29.475149000 | 8  | 43.083186000 | 48.154253000 | 44.840977000 |
| 1  | 50.269488000 | 42.486525000 | 32.252241000 | 6  | 39.979231000 | 48.082713000 | 44.076592000 |
| 1  | 49.762041000 | 42.089890000 | 29.819666000 | 6  | 40.008909000 | 47.800981000 | 45.592489000 |
| 1  | 48.769542000 | 40.707879000 | 30.224532000 | 6  | 40.199893000 | 49.077350000 | 46.424803000 |
| 1  | 47.272550000 | 42.305623000 | 31.577884000 | 6  | 38.730020000 | 47.057118000 | 46.007378000 |
| 1  | 48.861059000 | 44.249011000 | 31.760915000 | 1  | 41.294393000 | 49.812817000 | 43.920834000 |
| 1  | 48.806302000 | 44.446400000 | 29.998781000 | 1  | 39.087575000 | 48.684668000 | 43.845202000 |
| 1  | 47.350785000 | 44.715293000 | 30.971732000 | 1  | 39.847290000 | 47.132541000 | 43.540966000 |
| 1  | 47.463223000 | 42.667231000 | 28.543080000 | 1  | 40.867569000 | 47.149386000 | 45.797268000 |
| 1  | 46.592925000 | 41.376573000 | 29.425062000 | 1  | 41.186391000 | 49.511069000 | 46.244472000 |
| 1  | 46.043937000 | 43.045713000 | 29.545951000 | 1  | 39.432769000 | 49.828321000 | 46.184335000 |
| 7  | 48.259877000 | 39.940278000 | 32.791529000 | 1  | 40.121883000 | 48.857413000 | 47.497569000 |
| 6  | 47.374924000 | 39.358659000 | 33.796565000 | 1  | 38.598632000 | 46.132103000 | 45.432079000 |
| 6  | 46.354243000 | 38.427645000 | 33.113212000 | 1  | 38.753809000 | 46.789797000 | 47.071408000 |
| 6  | 45.654799000 | 39.136607000 | 31.926995000 | 1  | 37.839505000 | 47.679363000 | 45.841548000 |
| 8  | 46.358430000 | 39.324474000 | 30.905000000 | 7  | 43.013963000 | 47.381828000 | 42.691743000 |
| 8  | 44.449029000 | 39.508594000 | 32.097162000 | 6  | 44.195606000 | 46.535832000 | 42.767954000 |
| 1  | 47.918424000 | 39.810865000 | 31.833853000 | 6  | 43.860749000 | 45.062763000 | 42.461329000 |
| 1  | 46.853960000 | 40.159714000 | 34.335945000 | 6  | 42.930949000 | 44.442749000 | 43.501301000 |
| 1  | 46.876936000 | 37.544645000 | 32.725040000 | 8  | 43.230731000 | 44.954491000 | 41.190106000 |
| 1  | 45.622900000 | 38.098985000 | 33.858110000 | 1  | 42.469984000 | 47.312475000 | 41.840223000 |
| 6  | 50.669664000 | 43.875470000 | 35.897162000 | 1  | 44.606327000 | 46.650947000 | 43.774572000 |
| 6  | 49.911918000 | 43.397218000 | 37.124613000 | 1  | 44.809707000 | 44.505754000 | 42.452344000 |
| 8  | 49.960255000 | 44.034156000 | 38.191939000 | 1  | 43.936384000 | 45.048509000 | 40.498777000 |
| 1  | 50.259205000 | 44.841885000 | 35.583135000 | 1  | 42.745816000 | 43.389662000 | 43.262705000 |
| 1  | 50.608453000 | 43.167876000 | 35.066889000 | 1  | 43.365270000 | 44.505417000 | 44.505828000 |
| 7  | 49.203946000 | 42.262912000 | 36.976367000 | 1  | 41.967672000 | 44.964972000 | 43.511732000 |
| 6  | 48.425330000 | 41.689022000 | 38.070686000 | 8  | 44.954979000 | 37.841025000 | 42.063005000 |
| 6  | 47.579281000 | 40.516733000 | 37.590446000 | 26 | 46.349645000 | 36.314707000 | 42.502306000 |
| 1  | 49.199727000 | 41.795718000 | 36.068976000 | 7  | 44.840806000 | 35.346240000 | 43.428400000 |
| 1  | 47.781173000 | 42.461934000 | 38.503806000 | 7  | 46.759063000 | 37.365121000 | 44.180809000 |
| 1  | 48.206257000 | 39.719214000 | 37.173084000 | 7  | 45.857595000 | 35.361605000 | 40.792380000 |
| 1  | 47.005359000 | 40.110385000 | 38.427546000 | 6  | 43.970914000 | 33.999812000 | 41.572606000 |
| 1  | 46.867959000 | 40.834719000 | 36.822550000 | 6  | 45.138657000 | 36.288881000 | 45.679085000 |
| 6  | 48.007422000 | 46.778798000 | 38.546456000 | 6  | 48.576263000 | 38.794900000 | 43.374614000 |
| 6  | 48.031041000 | 46.515122000 | 40.046045000 | 6  | 47.571396000 | 36.341761000 | 39.325722000 |
| 8  | 47.550590000 | 47.312198000 | 40.867064000 | 6  | 43.967393000 | 34.431583000 | 42.893438000 |
| 6  | 46.899801000 | 45.949883000 | 37.840548000 | 6  | 46.169451000 | 37.179579000 | 45.401816000 |
| 6  | 45.552179000 | 45.972551000 | 38.589357000 | 6  | 48.599885000 | 38.340278000 | 42.061634000 |
| 8  | 45.425817000 | 45.138181000 | 39.537803000 | 6  | 46.507956000 | 35.484755000 | 39.589467000 |
| 8  | 44.679695000 | 46.816086000 | 38.232995000 | 6  | 43.065059000 | 33.948516000 | 43.912533000 |
| 1  | 47.832989000 | 47.846458000 | 38.397074000 | 6  | 46.762888000 | 38.063768000 | 46.381825000 |
| 1  | 46.765319000 | 46.348889000 | 36.830262000 | 6  | 49.533524000 | 38.793699000 | 41.056222000 |
| 1  | 47.234951000 | 44.912160000 | 37.757883000 | 6  | 45.918329000 | 34.599036000 | 38.613686000 |
| 7  | 48.566079000 | 45.322558000 | 40.397453000 | 6  | 43.411198000 | 34.575412000 | 45.071294000 |
| 6  | 48.419305000 | 44.749212000 | 41.721349000 | 6  | 47.718992000 | 38.781463000 | 45.733210000 |
| 6  | 47.970347000 | 43.283349000 | 41.650393000 | 6  | 49.255693000 | 38.095852000 | 39.922237000 |
| 6  | 47.968259000 | 42.642007000 | 43.036337000 | 6  | 44.901483000 | 33.941500000 | 39.241479000 |
| 8  | 46.659937000 | 43.120439000 | 41.109358000 | 6  | 44.518873000 | 35.450811000 | 44.755755000 |
| 1  | 49.002975000 | 44.756565000 | 39.666056000 | 6  | 47.714173000 | 38.330405000 | 44.359605000 |
| 1  | 47.690400000 | 45.354645000 | 42.267224000 | 6  | 48.148625000 | 37.219487000 | 40.233034000 |
| 1  | 48.691506000 | 42.746056000 | 41.010995000 | 6  | 44.870662000 | 34.425707000 | 40.600761000 |
| 1  | 46.414289000 | 43.827492000 | 40.459826000 | 7  | 47.762772000 | 37.388726000 | 41.539010000 |
| 1  | 47.301241000 | 43.191228000 | 43.710580000 | 1  | 43.231942000 | 33.258322000 | 41.283654000 |
| 1  | 47.613974000 | 41.607995000 | 42.976033000 | 1  | 44.780044000 | 36.245009000 | 46.703398000 |
| 1  | 48.976916000 | 42.636913000 | 43.467156000 | 1  | 49.296572000 | 39.557066000 | 43.654613000 |
| 6  | 40.248990000 | 37.451515000 | 48.174594000 | 1  | 47.980480000 | 36.328641000 | 38.319989000 |
| 6  | 39.165782000 | 36.805495000 | 47.296330000 | 6  | 44.128788000 | 42.534124000 | 33.857330000 |
| 8  | 37.974119000 | 36.931523000 | 47.569421000 | 6  | 44.076968000 | 42.512645000 | 36.104961000 |
| 6  | 41.435539000 | 38.085053000 | 47.438289000 | 6  | 44.081005000 | 42.745468000 | 37.488858000 |
| 6  | 42.297753000 | 38.948645000 | 48.358677000 | 6  | 43.897090000 | 40.088624000 | 36.504234000 |
| 8  | 42.213685000 | 37.001334000 | 46.897643000 | 6  | 43.960731000 | 41.172654000 | 35.622393000 |
| 1  | 39.736015000 | 38.207848000 | 48.774546000 | 6  | 44.197005000 | 43.369051000 | 34.951935000 |
| 1  | 41.054172000 | 38.704933000 | 46.612903000 | 6  | 44.000666000 | 41.663790000 | 38.359910000 |
| 1  | 42.850832000 | 37.352210000 | 46.252813000 | 6  | 43.926233000 | 40.339149000 | 37.878666000 |
| 1  | 42.668656000 | 38.354447000 | 49.201782000 | 7  | 43.973610000 | 41.222597000 | 34.245475000 |
| 1  | 43.161766000 | 39.348975000 | 47.814799000 | 6  | 44.394217000 | 44.856606000 | 34.938137000 |
| 1  | 41.725875000 | 39.796964000 | 48.751680000 | 6  | 43.144462000 | 45.674887000 | 35.330887000 |
| 7  | 39.632531000 | 36.084913000 | 46.238995000 | 7  | 43.459611000 | 47.085086000 | 35.523703000 |
| 6  | 38.770410000 | 35.483631000 | 45.233007000 | 6  | 43.272064000 | 48.026176000 | 34.573623000 |
| 6  | 39.132494000 | 35.914338000 | 43.796181000 | 8  | 42.757533000 | 47.784030000 | 33.469338000 |
| 6  | 38.958079000 | 37.432130000 | 43.601965000 | 6  | 43.718537000 | 49.434326000 | 34.939018000 |
| 6  | 38.312242000 | 35.096358000 | 42.786561000 | 8  | 43.961095000 | 42.006025000 | 39.701872000 |
| 6  | 39.540549000 | 37.974399000 | 42.292332000 | 6  | 44.125380000 | 41.039748000 | 40.703601000 |
| 1  | 40.639555000 | 36.070300000 | 46.105851000 | 1  | 44.182010000 | 42.766102000 | 32.801166000 |
| 1  | 37.746329000 | 35.776246000 | 45.483877000 | 1  | 44.156632000 | 43.739938000 | 37.913105000 |
| 1  | 40.197379000 | 35.673822000 | 43.640038000 | 1  | 44.442996000 | 49.777149000 | 34.192038000 |
| 1  | 37.886928000 | 37.676809000 | 43.661349000 | 1  | 44.228388000 | 37.614699000 | 41.443451000 |
| 1  | 39.433422000 | 37.949830000 | 44.444742000 | 1  | 43.480249000 | 40.168839000 | 40.548202000 |
| 1  | 38.583553000 | 35.332941000 | 41.752745000 | 1  | 43.831848000 | 41.561181000 | 41.620802000 |
| 1  | 38.463695000 | 34.019179000 | 42.934828000 | 1  | 43.865538000 | 39.066818000 | 36.131400000 |
| 1  | 37.239063000 | 35.299011000 | 42.903739000 | 1  | 43.950609000 | 39.509389000 | 38.574131000 |
| 1  | 39.449943000 | 39.065072000 | 42.246232000 | 1  | 45.199484000 | 45.126228000 | 35.633612000 |
| 1  | 40.605828000 | 37.719128000 | 42.207960000 | 1  | 44.720754000 | 45.182486000 | 33.942790000 |
| 1  | 39.033108000 | 37.562127000 | 41.414994000 | 1  | 42.725409000 | 45.294866000 | 36.267666000 |
| 6  | 47.951885000 | 32.441013000 | 41.604193000 | 1  | 42.379860000 | 45.601751000 | 34.554227000 |
| 6  | 47.340844000 | 33.099582000 | 42.842995000 | 1  | 44.162434000 | 49.522986000 | 35.935008000 |
| 16 | 47.922135000 | 34.823486000 | 43.119791000 | 1  | 42.852944000 | 50.103161000 | 34.879355000 |
| 1  | 47.664903000 | 32.974863000 | 40.693547000 | 1  | 44.037306000 | 40.436823000 | 33.582812000 |
| 1  | 46.250804000 | 33.095904000 | 42.785557000 | 1  | 43.933289000 | 47.307281000 | 36.400469000 |
| 1  | 47.619043000 | 32.538084000 | 43.743540000 | 8  | 45.444027000 | 40.548259000 | 40.789141000 |
| 6  | 41.203038000 | 48.814341000 | 43.480532000 | 1  | 45.359945000 | 38.661154000 | 41.703364000 |
| 6  | 42.523676000 | 48.092434000 | 43.742117000 | 1  | 46.009362000 | 41.348687000 | 40.913303000 |

|   |              |              |              |
|---|--------------|--------------|--------------|
| 1 | 49.046330000 | 32.436964000 | 41.660468000 |
| 1 | 47.611761000 | 31.399205000 | 41.514405000 |
| 1 | 49.737497000 | 38.160742000 | 38.955138000 |
| 1 | 50.293131000 | 39.548623000 | 41.215076000 |
| 1 | 48.374382000 | 39.547475000 | 46.128260000 |
| 1 | 46.469350000 | 38.115472000 | 47.423111000 |
| 1 | 42.965024000 | 34.482999000 | 46.052845000 |
| 1 | 42.279807000 | 33.221385000 | 43.746751000 |
| 1 | 44.227765000 | 33.197006000 | 38.835346000 |
| 1 | 46.248295000 | 34.506967000 | 37.586355000 |
| 1 | 49.370478000 | 44.793338000 | 42.273554000 |
| 1 | 48.974286000 | 46.513325000 | 38.104560000 |
| 1 | 44.947205000 | 46.883174000 | 42.048253000 |
| 1 | 41.034758000 | 48.945036000 | 42.405271000 |
| 1 | 41.495144000 | 35.639428000 | 37.803208000 |
| 1 | 38.485379000 | 38.582772000 | 36.929951000 |
| 1 | 38.825028000 | 34.386940000 | 45.307036000 |
| 1 | 40.643614000 | 36.695269000 | 48.868124000 |
| 1 | 40.827239000 | 42.089297000 | 28.771260000 |
| 1 | 40.491785000 | 46.027134000 | 31.061250000 |
| 1 | 41.163094000 | 51.431723000 | 30.859728000 |
| 1 | 41.946538000 | 50.722068000 | 40.623515000 |
| 1 | 43.201556000 | 54.931879000 | 37.840396000 |
| 1 | 47.783987000 | 53.237632000 | 39.759234000 |
| 1 | 49.106849000 | 41.365785000 | 38.870319000 |
| 1 | 51.716146000 | 44.042288000 | 36.173356000 |
| 1 | 47.966704000 | 38.807690000 | 34.537884000 |
| 1 | 50.790936000 | 40.912048000 | 31.686633000 |

**4IM1 HA,II**

|   |              |              |              |
|---|--------------|--------------|--------------|
| 6 | 40.965197000 | 45.187746000 | 29.942632000 |
| 6 | 40.990369000 | 43.960703000 | 29.032507000 |
| 8 | 40.092293000 | 43.742730000 | 28.218637000 |
| 6 | 39.662905000 | 45.281469000 | 30.765525000 |
| 6 | 39.577524000 | 46.647818000 | 31.474805000 |
| 6 | 39.548252000 | 44.101298000 | 31.743506000 |
| 6 | 38.228622000 | 46.927673000 | 32.149271000 |
| 1 | 41.834902000 | 45.207664000 | 30.613460000 |
| 1 | 38.836493000 | 45.209993000 | 30.044306000 |
| 1 | 40.379768000 | 46.733654000 | 32.220504000 |
| 1 | 39.768879000 | 47.438012000 | 30.734876000 |
| 1 | 38.603598000 | 44.126416000 | 32.297398000 |
| 1 | 39.591615000 | 43.142905000 | 31.214118000 |
| 1 | 40.365149000 | 44.115770000 | 32.477526000 |
| 1 | 38.029087000 | 46.232349000 | 32.972329000 |
| 1 | 38.208247000 | 47.940661000 | 32.567296000 |
| 1 | 37.400214000 | 46.843420000 | 31.433139000 |
| 7 | 42.069982000 | 43.145504000 | 29.185420000 |
| 6 | 42.247044000 | 41.886799000 | 28.481403000 |
| 6 | 42.601479000 | 40.775685000 | 29.465654000 |
| 8 | 43.720003000 | 41.200836000 | 30.215074000 |
| 1 | 42.747541000 | 43.331120000 | 29.912028000 |
| 1 | 43.054114000 | 41.982745000 | 27.740902000 |
| 1 | 41.732144000 | 40.573986000 | 30.114709000 |
| 1 | 42.815849000 | 39.852787000 | 28.902098000 |
| 1 | 43.986422000 | 40.447062000 | 30.810129000 |
| 6 | 41.500571000 | 36.824151000 | 38.542090000 |
| 6 | 40.419529000 | 37.884969000 | 38.299625000 |
| 8 | 39.240690000 | 37.638045000 | 38.547820000 |
| 6 | 42.905146000 | 37.312071000 | 38.887439000 |
| 8 | 42.945728000 | 38.056223000 | 40.111618000 |
| 1 | 41.122810000 | 36.181056000 | 39.341913000 |
| 1 | 43.562806000 | 36.455641000 | 39.046508000 |
| 1 | 43.335653000 | 37.901995000 | 38.067824000 |
| 1 | 42.359716000 | 38.828145000 | 40.027509000 |
| 7 | 40.834696000 | 39.078297000 | 37.782701000 |
| 6 | 39.893246000 | 40.115426000 | 37.367978000 |
| 6 | 40.140061000 | 41.471756000 | 38.043991000 |
| 6 | 40.005067000 | 41.501864000 | 39.556249000 |
| 6 | 38.927040000 | 40.896165000 | 40.220911000 |
| 6 | 40.941383000 | 42.212907000 | 40.320862000 |
| 6 | 38.776141000 | 41.025018000 | 41.602936000 |
| 6 | 40.794865000 | 42.347248000 | 41.704289000 |
| 6 | 39.702562000 | 41.761154000 | 42.347862000 |
| 1 | 41.800730000 | 39.205930000 | 37.501327000 |
| 1 | 38.897935000 | 39.728052000 | 37.589912000 |
| 1 | 41.133323000 | 41.840163000 | 37.762170000 |
| 1 | 39.424085000 | 42.181347000 | 37.602686000 |
| 1 | 38.198682000 | 40.315915000 | 39.661131000 |
| 1 | 41.792532000 | 42.681059000 | 39.834244000 |
| 1 | 37.928900000 | 40.556454000 | 42.097900000 |
| 1 | 41.534112000 | 42.922401000 | 42.254984000 |
| 1 | 39.568487000 | 41.882292000 | 43.419941000 |
| 6 | 46.341195000 | 52.714918000 | 39.388806000 |
| 6 | 45.289834000 | 53.539711000 | 40.138307000 |
| 8 | 45.553557000 | 54.103394000 | 41.196160000 |
| 6 | 46.410952000 | 51.251164000 | 39.866527000 |
| 6 | 45.310749000 | 50.353532000 | 39.291740000 |
| 7 | 45.478816000 | 49.040928000 | 39.472873000 |
| 8 | 44.311388000 | 50.831210000 | 38.712927000 |
| 1 | 46.166987000 | 52.742361000 | 38.307759000 |
| 1 | 47.383993000 | 50.816948000 | 39.606372000 |
| 1 | 46.351801000 | 51.217091000 | 40.962320000 |

|   |              |              |              |
|---|--------------|--------------|--------------|
| 1 | 46.346912000 | 48.628363000 | 39.833100000 |
| 1 | 44.801844000 | 48.381795000 | 39.081371000 |
| 7 | 44.059176000 | 53.595132000 | 39.536768000 |
| 6 | 42.892689000 | 54.106392000 | 40.233156000 |
| 6 | 41.905749000 | 53.064499000 | 40.800308000 |
| 8 | 40.891826000 | 53.451442000 | 41.377995000 |
| 1 | 43.920974000 | 52.929542000 | 38.783036000 |
| 1 | 43.256500000 | 54.702732000 | 41.073295000 |
| 7 | 42.247594000 | 51.766478000 | 40.614716000 |
| 6 | 41.443501000 | 50.640170000 | 41.057908000 |
| 6 | 40.962067000 | 49.778991000 | 39.867981000 |
| 6 | 40.374110000 | 48.460246000 | 40.320152000 |
| 6 | 39.088949000 | 48.401072000 | 40.879778000 |
| 6 | 41.121213000 | 47.274478000 | 40.233262000 |
| 6 | 38.562906000 | 47.193932000 | 41.345740000 |
| 6 | 40.599705000 | 46.066820000 | 40.707382000 |
| 6 | 39.319369000 | 46.022145000 | 41.265682000 |
| 1 | 43.064766000 | 51.539788000 | 40.054375000 |
| 1 | 40.601361000 | 51.042766000 | 41.625634000 |
| 1 | 40.229002000 | 50.357643000 | 39.291031000 |
| 1 | 41.818363000 | 49.596875000 | 39.208570000 |
| 1 | 38.494050000 | 49.310307000 | 40.946339000 |
| 1 | 42.111110000 | 47.276736000 | 39.778865000 |
| 1 | 37.561798000 | 47.169279000 | 41.770361000 |
| 1 | 41.204655000 | 45.167809000 | 40.649359000 |
| 1 | 38.917501000 | 45.078990000 | 41.626419000 |
| 6 | 39.959080000 | 50.847956000 | 33.185593000 |
| 6 | 40.971753000 | 51.014940000 | 32.056428000 |
| 7 | 41.953963000 | 50.077062000 | 32.035939000 |
| 8 | 40.894528000 | 51.934614000 | 31.244663000 |
| 1 | 40.131573000 | 49.948728000 | 33.783183000 |
| 1 | 38.953674000 | 50.811315000 | 32.753659000 |
| 1 | 42.633499000 | 50.135834000 | 31.290426000 |
| 1 | 41.996520000 | 49.298116000 | 32.700280000 |
| 6 | 49.916713000 | 40.176789000 | 31.402767000 |
| 6 | 49.127948000 | 39.919383000 | 32.690840000 |
| 8 | 49.495382000 | 40.426470000 | 33.764394000 |
| 6 | 49.107967000 | 40.232697000 | 30.092918000 |
| 6 | 48.042484000 | 41.348174000 | 30.013083000 |
| 6 | 48.675970000 | 42.745300000 | 29.929477000 |
| 6 | 47.086996000 | 41.093981000 | 28.838186000 |
| 1 | 50.467104000 | 41.107746000 | 31.569022000 |
| 1 | 49.817240000 | 40.357631000 | 29.260615000 |
| 1 | 48.618957000 | 39.266059000 | 29.918672000 |
| 1 | 47.436988000 | 41.303400000 | 30.928164000 |
| 1 | 49.323110000 | 42.962405000 | 30.787951000 |
| 1 | 49.282811000 | 42.845659000 | 29.018337000 |
| 1 | 47.901564000 | 43.520765000 | 29.898273000 |
| 1 | 47.628715000 | 41.092126000 | 27.880744000 |
| 1 | 46.579938000 | 40.133172000 | 28.968679000 |
| 1 | 46.309485000 | 41.864452000 | 28.792867000 |
| 7 | 48.075620000 | 39.087541000 | 32.593135000 |
| 6 | 47.131204000 | 38.870470000 | 33.685255000 |
| 6 | 45.952454000 | 38.015700000 | 33.182222000 |
| 6 | 45.345478000 | 38.623758000 | 31.895575000 |
| 8 | 46.030619000 | 38.502369000 | 30.851543000 |
| 8 | 44.235557000 | 39.237180000 | 32.006535000 |
| 1 | 47.692768000 | 38.831247000 | 31.677506000 |
| 1 | 46.765214000 | 39.837382000 | 34.055066000 |
| 1 | 46.312284000 | 37.005340000 | 32.952676000 |
| 1 | 45.201803000 | 37.944008000 | 33.975269000 |
| 6 | 49.740362000 | 43.664079000 | 34.668478000 |
| 6 | 49.348471000 | 43.245944000 | 36.075522000 |
| 8 | 49.324314000 | 44.070545000 | 37.003986000 |
| 1 | 48.899846000 | 44.194310000 | 34.205053000 |
| 1 | 49.999575000 | 42.808148000 | 34.040920000 |
| 7 | 49.020079000 | 41.949902000 | 36.235028000 |
| 6 | 48.583185000 | 41.416379000 | 37.520849000 |
| 6 | 48.009809000 | 40.011951000 | 37.367307000 |
| 1 | 49.085542000 | 41.321191000 | 35.433174000 |
| 1 | 47.831153000 | 42.086812000 | 37.950419000 |
| 1 | 48.753506000 | 39.323646000 | 36.946450000 |
| 1 | 47.695405000 | 39.633232000 | 38.344087000 |
| 1 | 47.133416000 | 40.018868000 | 36.712346000 |
| 6 | 47.509831000 | 46.797694000 | 37.792664000 |
| 6 | 48.018168000 | 46.633986000 | 39.219305000 |
| 8 | 47.799041000 | 47.471480000 | 40.108365000 |
| 6 | 46.317394000 | 45.851150000 | 37.490118000 |
| 6 | 45.219139000 | 45.904597000 | 38.568564000 |
| 8 | 45.435374000 | 45.243944000 | 39.627618000 |
| 8 | 44.198531000 | 46.624324000 | 38.349942000 |
| 1 | 47.211630000 | 47.840733000 | 37.661038000 |
| 1 | 45.895122000 | 46.132101000 | 36.520129000 |
| 1 | 46.692252000 | 44.826588000 | 37.414816000 |
| 7 | 48.688720000 | 45.480845000 | 39.449599000 |
| 6 | 48.959561000 | 44.987822000 | 40.786020000 |
| 6 | 48.513357000 | 43.528882000 | 40.942894000 |
| 6 | 48.894224000 | 42.984515000 | 42.317070000 |
| 8 | 47.104731000 | 43.359697000 | 40.789915000 |
| 1 | 48.884602000 | 44.868946000 | 38.655377000 |
| 1 | 48.428755000 | 45.634876000 | 41.489938000 |
| 1 | 49.030774000 | 42.936162000 | 40.169881000 |
| 1 | 46.682498000 | 44.054884000 | 40.218633000 |

|    |              |              |              |
|----|--------------|--------------|--------------|
| 1  | 48.437882000 | 43.590629000 | 43.107919000 |
| 1  | 48.536652000 | 41.956561000 | 42.428077000 |
| 1  | 49.982827000 | 42.989225000 | 42.452447000 |
| 6  | 39.590998000 | 39.876051000 | 46.575726000 |
| 6  | 38.359036000 | 39.029931000 | 46.225944000 |
| 8  | 37.223161000 | 39.427614000 | 46.475863000 |
| 6  | 40.798882000 | 39.790904000 | 45.636655000 |
| 6  | 41.864140000 | 40.832618000 | 45.975316000 |
| 8  | 41.343249000 | 38.459880000 | 45.764828000 |
| 1  | 39.240967000 | 40.910514000 | 46.633883000 |
| 1  | 40.461814000 | 39.939937000 | 44.600819000 |
| 1  | 42.012611000 | 38.335382000 | 45.071081000 |
| 1  | 42.192392000 | 40.720722000 | 47.015203000 |
| 1  | 42.740676000 | 40.719143000 | 45.326803000 |
| 1  | 41.478473000 | 41.849573000 | 45.840693000 |
| 7  | 38.621076000 | 37.818686000 | 45.661107000 |
| 6  | 37.577330000 | 36.854535000 | 45.355491000 |
| 6  | 37.942286000 | 35.947586000 | 44.166386000 |
| 6  | 38.043023000 | 36.738466000 | 42.846496000 |
| 6  | 36.932977000 | 34.792335000 | 44.078680000 |
| 6  | 38.687460000 | 35.964149000 | 41.690517000 |
| 1  | 39.598877000 | 37.559238000 | 45.565906000 |
| 1  | 36.661659000 | 37.419019000 | 45.150593000 |
| 1  | 38.934141000 | 35.511011000 | 44.374074000 |
| 1  | 37.034252000 | 37.068253000 | 42.556206000 |
| 1  | 38.620526000 | 37.653561000 | 43.027161000 |
| 1  | 37.182278000 | 34.100624000 | 43.267744000 |
| 1  | 36.903880000 | 34.216088000 | 45.011843000 |
| 1  | 35.920662000 | 35.174106000 | 43.890877000 |
| 1  | 38.755448000 | 36.578694000 | 40.786597000 |
| 1  | 39.704604000 | 35.646660000 | 41.958031000 |
| 1  | 38.115625000 | 35.064777000 | 41.430592000 |
| 6  | 47.912331000 | 33.130731000 | 42.313368000 |
| 6  | 47.104994000 | 33.832243000 | 43.407776000 |
| 16 | 47.637433000 | 35.562147000 | 43.729534000 |
| 1  | 47.780855000 | 33.627729000 | 41.348146000 |
| 1  | 46.038805000 | 33.820073000 | 43.169072000 |
| 1  | 47.225410000 | 33.304723000 | 44.362383000 |
| 6  | 41.317072000 | 47.869790000 | 44.506097000 |
| 6  | 42.793501000 | 47.494622000 | 44.395691000 |
| 8  | 43.562548000 | 47.620323000 | 45.352522000 |
| 6  | 40.460229000 | 46.769609000 | 45.172711000 |
| 6  | 40.899547000 | 46.305673000 | 46.576216000 |
| 6  | 40.982890000 | 47.463856000 | 47.581097000 |
| 6  | 39.952628000 | 45.204923000 | 47.079254000 |
| 1  | 41.268673000 | 48.791607000 | 45.094491000 |
| 1  | 39.426118000 | 47.141670000 | 45.229258000 |
| 1  | 40.429600000 | 45.898245000 | 44.504109000 |
| 1  | 41.906816000 | 45.878418000 | 46.489635000 |
| 1  | 41.775464000 | 48.161972000 | 47.298121000 |
| 1  | 40.031091000 | 48.011373000 | 47.638520000 |
| 1  | 41.210363000 | 47.089223000 | 48.587446000 |
| 1  | 39.904829000 | 44.363067000 | 46.376456000 |
| 1  | 40.278841000 | 44.812830000 | 48.050528000 |
| 1  | 38.930449000 | 45.588971000 | 47.202881000 |
| 7  | 43.181605000 | 47.007070000 | 43.184796000 |
| 6  | 44.514654000 | 46.483497000 | 42.924738000 |
| 6  | 44.540765000 | 44.950513000 | 42.771164000 |
| 6  | 44.065495000 | 44.221469000 | 44.024109000 |
| 8  | 43.716101000 | 44.537957000 | 41.683466000 |
| 1  | 42.480880000 | 46.845329000 | 42.471655000 |
| 1  | 45.147471000 | 46.799943000 | 43.757977000 |
| 1  | 45.584037000 | 44.666543000 | 42.567029000 |
| 1  | 44.186574000 | 44.802683000 | 40.853044000 |
| 1  | 44.166061000 | 43.138106000 | 43.894594000 |
| 1  | 44.646479000 | 44.527116000 | 44.901101000 |
| 1  | 43.011313000 | 44.447978000 | 44.219673000 |
| 8  | 45.147292000 | 38.539410000 | 41.816921000 |
| 26 | 46.310958000 | 37.063147000 | 42.641742000 |
| 7  | 44.607176000 | 36.242607000 | 43.373871000 |
| 7  | 46.499697000 | 38.253916000 | 44.276314000 |
| 7  | 46.087311000 | 35.922172000 | 40.972232000 |
| 6  | 44.059872000 | 34.660980000 | 41.589183000 |
| 6  | 44.477403000 | 37.508787000 | 45.475751000 |
| 6  | 48.603939000 | 39.399862000 | 43.726889000 |
| 6  | 48.047723000 | 36.760708000 | 39.721176000 |
| 6  | 43.825219000 | 35.261527000 | 42.817088000 |
| 6  | 45.635718000 | 38.297454000 | 45.348712000 |
| 6  | 48.803165000 | 38.850071000 | 42.471091000 |
| 6  | 46.906955000 | 35.936089000 | 39.864098000 |
| 6  | 42.715883000 | 34.945566000 | 43.691952000 |
| 6  | 46.095838000 | 39.225282000 | 46.323412000 |
| 6  | 49.923926000 | 39.156154000 | 41.604641000 |
| 6  | 46.464622000 | 34.994237000 | 38.902195000 |
| 6  | 42.831052000 | 35.753748000 | 44.779746000 |
| 6  | 47.276257000 | 39.751497000 | 45.838844000 |
| 6  | 49.754056000 | 38.428092000 | 40.471430000 |
| 6  | 45.340814000 | 34.381409000 | 39.437669000 |
| 6  | 44.012751000 | 36.564665000 | 44.578558000 |
| 6  | 47.501334000 | 39.136068000 | 44.575294000 |
| 6  | 48.536652000 | 37.662585000 | 40.642015000 |
| 6  | 45.127552000 | 34.975380000 | 40.709095000 |
| 7  | 47.966621000 | 37.946913000 | 41.866195000 |

|   |              |              |              |
|---|--------------|--------------|--------------|
| 1 | 43.360266000 | 33.896689000 | 41.263402000 |
| 1 | 43.889756000 | 37.654340000 | 46.378144000 |
| 1 | 49.345300000 | 40.106422000 | 44.087238000 |
| 1 | 48.605036000 | 36.655000000 | 38.794543000 |
| 6 | 43.477969000 | 42.365898000 | 33.527045000 |
| 6 | 43.730814000 | 42.521321000 | 35.753003000 |
| 6 | 43.894436000 | 42.873399000 | 37.099730000 |
| 6 | 44.081295000 | 40.153783000 | 36.319676000 |
| 6 | 43.808614000 | 41.147488000 | 35.373011000 |
| 6 | 43.522355000 | 43.288845000 | 34.551501000 |
| 6 | 44.158133000 | 41.881114000 | 38.039964000 |
| 6 | 44.268276000 | 40.526290000 | 37.657932000 |
| 7 | 43.625839000 | 41.083506000 | 34.008486000 |
| 6 | 43.519266000 | 44.787637000 | 34.473960000 |
| 6 | 42.407503000 | 45.474959000 | 35.309921000 |
| 7 | 42.786123000 | 46.804771000 | 35.774925000 |
| 6 | 42.570917000 | 47.917616000 | 35.050879000 |
| 8 | 40.808611000 | 47.898624000 | 33.938335000 |
| 6 | 43.034285000 | 49.222589000 | 35.673990000 |
| 8 | 44.287182000 | 42.345172000 | 39.331357000 |
| 6 | 44.481141000 | 41.469309000 | 40.410703000 |
| 1 | 43.380047000 | 42.510514000 | 32.458500000 |
| 1 | 43.832043000 | 43.900199000 | 37.442553000 |
| 1 | 43.668106000 | 49.754758000 | 34.957038000 |
| 1 | 44.450766000 | 38.247123000 | 41.186356000 |
| 1 | 43.790823000 | 40.620633000 | 40.363736000 |
| 1 | 44.271960000 | 42.091611000 | 41.283736000 |
| 1 | 44.197299000 | 39.114110000 | 36.020233000 |
| 1 | 44.556845000 | 39.780671000 | 38.388855000 |
| 1 | 44.483914000 | 45.160204000 | 34.848021000 |
| 1 | 43.446102000 | 45.125007000 | 33.433542000 |
| 1 | 42.180985000 | 44.879397000 | 36.197447000 |
| 1 | 41.490273000 | 45.562744000 | 34.722399000 |
| 1 | 43.576172000 | 49.096952000 | 36.613900000 |
| 1 | 42.160413000 | 49.856204000 | 35.861237000 |
| 1 | 43.778650000 | 40.269132000 | 33.938060000 |
| 1 | 43.295051000 | 46.860027000 | 36.665498000 |
| 8 | 45.783565000 | 40.925271000 | 40.452982000 |
| 1 | 45.602554000 | 39.313408000 | 41.405878000 |
| 1 | 46.387705000 | 41.696172000 | 40.604661000 |
| 1 | 48.981727000 | 33.133468000 | 42.553063000 |
| 1 | 47.588974000 | 32.085017000 | 42.208505000 |
| 1 | 50.382514000 | 38.393504000 | 39.590488000 |
| 1 | 50.718869000 | 39.848694000 | 41.850200000 |
| 1 | 47.918641000 | 40.494770000 | 46.293430000 |
| 1 | 45.592918000 | 39.449627000 | 47.255606000 |
| 1 | 42.188633000 | 35.814897000 | 45.648971000 |
| 1 | 41.957462000 | 34.202312000 | 43.480115000 |
| 1 | 44.726446000 | 33.604634000 | 38.999676000 |
| 1 | 46.935994000 | 34.811881000 | 37.944651000 |
| 1 | 50.033623000 | 45.049827000 | 41.017802000 |
| 1 | 48.314905000 | 46.568302000 | 37.085458000 |
| 1 | 44.904612000 | 46.930519000 | 42.002862000 |
| 1 | 40.892555000 | 48.087151000 | 43.519277000 |
| 1 | 41.559341000 | 36.205936000 | 37.634460000 |
| 1 | 39.964030000 | 40.246091000 | 36.280486000 |
| 1 | 37.369791000 | 36.229726000 | 46.239385000 |
| 1 | 39.921983000 | 39.593753000 | 47.585679000 |
| 1 | 41.315797000 | 41.673041000 | 27.950765000 |
| 1 | 41.041196000 | 46.069642000 | 29.292905000 |
| 1 | 40.001183000 | 51.729482000 | 33.834795000 |
| 1 | 42.040724000 | 50.015432000 | 41.735128000 |
| 1 | 42.313271000 | 54.770158000 | 39.580907000 |
| 1 | 47.302140000 | 53.195083000 | 39.594508000 |
| 1 | 49.430719000 | 41.405171000 | 38.222005000 |
| 1 | 50.579918000 | 44.362296000 | 34.729265000 |
| 1 | 47.638422000 | 38.378635000 | 34.523952000 |
| 1 | 50.675881000 | 39.384477000 | 31.326227000 |

## 2REII,SH

|   |              |              |              |
|---|--------------|--------------|--------------|
| 6 | 43.273741000 | 47.689290000 | 31.720244000 |
| 6 | 44.076487000 | 46.685430000 | 30.891075000 |
| 8 | 43.816825000 | 46.485286000 | 29.701573000 |
| 6 | 41.753827000 | 47.522205000 | 31.528131000 |
| 6 | 41.001196000 | 48.728539000 | 32.122739000 |
| 6 | 41.270862000 | 46.185151000 | 32.115140000 |
| 6 | 39.495273000 | 48.752234000 | 31.832876000 |
| 1 | 43.545007000 | 47.633110000 | 32.781170000 |
| 1 | 41.579827000 | 47.504488000 | 30.443446000 |
| 1 | 41.160004000 | 48.753772000 | 33.210964000 |
| 1 | 41.450596000 | 49.650700000 | 31.727279000 |
| 1 | 40.209531000 | 46.009791000 | 31.902090000 |
| 1 | 41.831228000 | 45.346520000 | 31.684793000 |
| 1 | 41.402468000 | 46.160981000 | 33.201593000 |
| 1 | 38.975298000 | 47.912423000 | 32.306868000 |
| 1 | 39.038368000 | 49.675695000 | 32.209101000 |
| 1 | 39.300160000 | 48.699499000 | 30.753698000 |
| 7 | 45.091398000 | 46.056881000 | 31.541061000 |
| 6 | 46.003254000 | 45.173316000 | 30.824951000 |
| 6 | 45.523112000 | 43.729039000 | 30.686015000 |
| 8 | 45.554277000 | 43.087045000 | 31.945487000 |
| 1 | 45.296251000 | 46.305463000 | 32.506624000 |
| 1 | 46.963136000 | 45.180752000 | 31.352419000 |

|   |              |              |              |    |              |              |              |
|---|--------------|--------------|--------------|----|--------------|--------------|--------------|
| 1 | 44.512603000 | 43.734030000 | 30.249776000 | 6  | 44.914227000 | 38.278896000 | 32.653702000 |
| 1 | 46.190169000 | 43.219923000 | 29.969588000 | 6  | 45.347054000 | 39.589762000 | 31.952866000 |
| 1 | 45.275038000 | 42.144482000 | 31.817874000 | 8  | 46.539807000 | 39.635239000 | 31.564459000 |
| 6 | 36.161207000 | 38.936398000 | 34.888074000 | 8  | 44.487843000 | 40.524156000 | 31.871429000 |
| 6 | 35.063075000 | 39.543278000 | 35.746725000 | 1  | 47.278473000 | 38.752752000 | 33.038759000 |
| 8 | 34.784285000 | 39.065858000 | 36.851623000 | 1  | 45.114075000 | 38.921678000 | 34.724649000 |
| 6 | 37.479786000 | 38.859144000 | 35.686327000 | 1  | 45.246589000 | 37.431901000 | 32.041279000 |
| 8 | 37.379671000 | 37.993780000 | 36.801711000 | 1  | 43.825604000 | 38.224164000 | 32.754657000 |
| 1 | 35.857686000 | 37.918048000 | 34.617694000 | 6  | 45.866906000 | 41.033291000 | 37.838676000 |
| 1 | 38.269085000 | 38.460328000 | 35.041374000 | 6  | 44.931655000 | 39.990274000 | 38.413763000 |
| 1 | 37.783590000 | 39.872506000 | 35.989205000 | 8  | 44.118952000 | 40.298414000 | 39.312483000 |
| 1 | 36.552997000 | 38.239742000 | 37.261051000 | 1  | 46.311995000 | 41.605033000 | 38.657760000 |
| 7 | 34.422246000 | 40.634387000 | 35.238341000 | 1  | 45.283365000 | 41.729921000 | 37.226426000 |
| 6 | 33.500273000 | 41.442764000 | 36.024675000 | 7  | 45.001957000 | 38.759479000 | 37.884298000 |
| 6 | 34.100001000 | 42.799630000 | 36.458544000 | 6  | 44.158230000 | 37.658162000 | 38.345383000 |
| 6 | 35.361426000 | 42.662227000 | 37.284034000 | 6  | 43.970407000 | 36.596931000 | 37.266881000 |
| 6 | 35.296363000 | 42.289210000 | 38.633702000 | 1  | 45.753570000 | 38.554219000 | 37.223095000 |
| 6 | 36.622873000 | 42.851990000 | 36.705138000 | 1  | 43.189975000 | 38.074737000 | 38.623769000 |
| 6 | 36.459098000 | 42.096744000 | 39.379644000 | 1  | 44.927853000 | 36.163880000 | 36.956535000 |
| 6 | 37.791666000 | 42.655429000 | 37.446440000 | 1  | 43.345836000 | 35.791502000 | 37.666112000 |
| 6 | 37.712348000 | 42.272103000 | 38.787237000 | 1  | 43.475947000 | 37.018462000 | 36.384489000 |
| 1 | 34.776379000 | 41.025517000 | 34.376229000 | 6  | 44.299124000 | 44.030676000 | 40.913546000 |
| 1 | 33.243586000 | 40.840615000 | 36.898602000 | 6  | 43.777982000 | 43.163251000 | 42.061283000 |
| 1 | 34.304140000 | 43.404251000 | 35.564293000 | 8  | 43.555847000 | 43.630289000 | 43.183526000 |
| 1 | 33.324234000 | 43.334625000 | 37.023002000 | 6  | 43.628585000 | 45.405527000 | 40.929172000 |
| 1 | 34.325652000 | 42.139436000 | 39.102347000 | 6  | 44.104750000 | 46.402595000 | 39.863475000 |
| 1 | 36.694286000 | 43.157886000 | 35.662908000 | 8  | 43.820212000 | 47.634333000 | 40.099904000 |
| 1 | 36.387650000 | 41.803578000 | 40.423668000 | 8  | 44.693673000 | 45.967837000 | 38.851199000 |
| 1 | 38.762307000 | 42.796395000 | 36.979248000 | 1  | 45.382699000 | 44.154895000 | 41.044277000 |
| 1 | 38.621774000 | 42.097729000 | 39.353271000 | 1  | 42.544339000 | 45.285885000 | 40.788402000 |
| 6 | 45.948056000 | 53.532894000 | 38.172835000 | 1  | 43.746547000 | 45.850943000 | 41.920353000 |
| 6 | 44.639060000 | 54.295038000 | 37.956978000 | 7  | 43.589128000 | 41.851942000 | 41.765569000 |
| 8 | 44.233390000 | 55.109910000 | 38.780615000 | 6  | 43.078577000 | 40.919247000 | 42.761148000 |
| 6 | 45.802317000 | 52.408996000 | 39.211483000 | 6  | 43.352654000 | 39.455831000 | 42.396834000 |
| 6 | 45.071220000 | 51.174340000 | 38.670543000 | 6  | 42.966666000 | 38.520609000 | 43.538012000 |
| 7 | 45.053962000 | 50.110889000 | 39.477403000 | 8  | 42.591429000 | 39.068044000 | 41.244075000 |
| 8 | 44.538350000 | 51.186052000 | 37.542344000 | 1  | 43.766032000 | 41.516824000 | 40.821157000 |
| 1 | 46.335498000 | 53.123006000 | 37.234998000 | 1  | 41.993626000 | 41.047377000 | 42.888356000 |
| 1 | 46.792102000 | 52.100039000 | 39.570289000 | 1  | 44.424243000 | 39.335079000 | 42.180237000 |
| 1 | 45.261083000 | 52.790531000 | 40.086999000 | 1  | 43.045527000 | 39.429126000 | 40.447754000 |
| 1 | 45.440059000 | 50.111175000 | 40.420037000 | 1  | 41.897837000 | 38.614575000 | 43.765155000 |
| 1 | 44.539245000 | 49.252006000 | 39.254834000 | 1  | 43.175077000 | 37.484732000 | 43.256062000 |
| 7 | 43.979719000 | 54.009097000 | 36.790402000 | 1  | 43.538584000 | 38.751739000 | 44.443096000 |
| 6 | 42.638902000 | 54.496592000 | 36.524883000 | 6  | 38.963931000 | 33.215160000 | 42.430503000 |
| 6 | 41.488295000 | 53.478314000 | 36.649601000 | 6  | 37.661446000 | 33.314305000 | 41.627063000 |
| 8 | 40.359200000 | 53.809716000 | 36.292654000 | 8  | 36.605340000 | 32.862474000 | 42.072089000 |
| 1 | 44.296288000 | 53.182991000 | 36.297870000 | 6  | 39.978216000 | 34.358295000 | 42.283872000 |
| 1 | 42.448846000 | 55.303446000 | 37.237546000 | 6  | 41.134296000 | 34.210704000 | 43.277743000 |
| 7 | 41.817453000 | 52.270304000 | 37.166723000 | 8  | 40.459478000 | 34.343828000 | 40.943170000 |
| 6 | 40.870958000 | 51.176256000 | 37.319959000 | 1  | 38.667110000 | 33.107928000 | 43.478136000 |
| 6 | 41.326354000 | 49.927018000 | 36.535499000 | 1  | 39.461947000 | 35.313379000 | 42.486771000 |
| 6 | 40.460915000 | 48.718319000 | 36.816870000 | 1  | 41.081678000 | 35.108054000 | 40.830348000 |
| 6 | 39.255770000 | 48.520860000 | 36.127613000 | 1  | 41.638098000 | 33.246631000 | 43.139973000 |
| 6 | 40.831967000 | 47.785425000 | 37.797106000 | 1  | 41.872023000 | 35.002266000 | 43.113528000 |
| 6 | 38.441412000 | 47.421550000 | 36.405619000 | 1  | 40.778340000 | 34.276287000 | 44.313815000 |
| 6 | 40.018090000 | 46.684402000 | 38.075209000 | 7  | 37.782905000 | 33.890234000 | 40.398937000 |
| 6 | 38.819621000 | 46.497603000 | 37.382025000 | 6  | 36.679409000 | 33.995899000 | 39.461255000 |
| 1 | 42.788971000 | 52.061531000 | 37.385248000 | 6  | 36.269774000 | 35.443954000 | 39.115207000 |
| 1 | 39.899794000 | 51.534840000 | 36.970808000 | 6  | 35.771798000 | 36.198520000 | 40.362293000 |
| 1 | 41.315717000 | 50.166638000 | 35.464537000 | 6  | 35.225164000 | 35.416016000 | 37.988013000 |
| 1 | 42.367135000 | 49.713445000 | 36.804712000 | 6  | 35.608949000 | 37.711625000 | 40.170419000 |
| 1 | 38.957473000 | 49.233955000 | 35.361348000 | 1  | 38.719902000 | 34.200281000 | 40.140874000 |
| 1 | 41.763980000 | 47.916483000 | 38.343726000 | 1  | 35.837259000 | 33.462038000 | 39.912805000 |
| 1 | 37.513022000 | 47.284250000 | 35.855759000 | 1  | 37.161112000 | 35.963414000 | 38.731308000 |
| 1 | 40.324329000 | 45.968131000 | 38.833822000 | 1  | 34.815877000 | 35.759132000 | 40.684789000 |
| 1 | 38.191952000 | 45.636824000 | 37.596529000 | 1  | 36.478742000 | 36.018931000 | 41.181347000 |
| 6 | 46.767560000 | 50.492946000 | 32.641576000 | 1  | 34.954875000 | 36.421458000 | 37.651927000 |
| 6 | 48.151197000 | 49.850616000 | 32.628961000 | 1  | 35.606428000 | 34.871367000 | 37.115014000 |
| 7 | 48.201640000 | 48.604360000 | 33.169526000 | 1  | 34.307100000 | 34.912163000 | 38.321402000 |
| 8 | 49.132463000 | 50.427187000 | 32.166176000 | 1  | 35.281592000 | 38.189315000 | 41.102210000 |
| 1 | 46.008798000 | 49.866118000 | 33.117561000 | 1  | 36.560898000 | 38.175684000 | 39.882169000 |
| 1 | 46.467373000 | 50.700858000 | 31.608962000 | 1  | 34.876084000 | 37.961776000 | 39.395852000 |
| 1 | 49.089807000 | 48.123029000 | 33.143882000 | 16 | 48.742564000 | 34.318213000 | 42.277284000 |
| 1 | 47.373983000 | 48.117681000 | 33.523003000 | 6  | 40.353004000 | 47.253628000 | 42.467979000 |
| 6 | 49.255639000 | 38.847668000 | 34.753009000 | 6  | 41.194150000 | 48.357316000 | 43.101080000 |
| 6 | 47.793531000 | 38.487477000 | 35.022693000 | 8  | 40.864169000 | 48.883929000 | 44.168105000 |
| 8 | 47.400837000 | 38.267550000 | 36.187910000 | 6  | 40.494136000 | 45.874921000 | 43.154763000 |
| 6 | 49.515587000 | 39.848683000 | 33.610833000 | 6  | 40.193737000 | 45.802921000 | 44.665210000 |
| 6 | 48.877282000 | 41.243432000 | 33.788754000 | 6  | 38.790701000 | 46.315233000 | 45.020139000 |
| 6 | 49.529091000 | 42.035832000 | 34.932145000 | 6  | 40.403420000 | 44.359530000 | 45.151539000 |
| 6 | 48.925727000 | 42.024399000 | 32.468026000 | 1  | 39.311955000 | 47.590936000 | 42.520493000 |
| 1 | 49.656072000 | 39.217132000 | 35.701697000 | 1  | 39.818884000 | 45.180967000 | 42.630557000 |
| 1 | 50.604413000 | 39.965922000 | 33.504824000 | 1  | 41.507582000 | 45.490587000 | 42.993014000 |
| 1 | 49.171489000 | 39.422614000 | 32.660034000 | 1  | 40.916910000 | 46.447333000 | 45.181299000 |
| 1 | 47.815436000 | 41.102869000 | 34.031927000 | 1  | 38.701830000 | 47.384520000 | 44.806884000 |
| 1 | 49.458159000 | 41.516065000 | 35.895396000 | 1  | 38.016134000 | 45.776132000 | 44.455616000 |
| 1 | 50.593991000 | 42.214445000 | 34.726652000 | 1  | 38.581818000 | 46.168611000 | 46.088040000 |
| 1 | 49.046182000 | 43.012598000 | 35.051048000 | 1  | 41.394523000 | 43.984849000 | 44.870868000 |
| 1 | 49.963330000 | 42.179774000 | 32.138071000 | 1  | 40.301333000 | 44.291104000 | 46.242537000 |
| 1 | 48.377661000 | 41.482459000 | 31.691218000 | 1  | 39.656055000 | 43.686195000 | 44.707986000 |
| 1 | 48.447084000 | 43.002970000 | 32.579241000 | 7  | 42.315153000 | 48.718376000 | 42.412715000 |
| 7 | 46.992626000 | 38.379813000 | 33.951757000 | 6  | 43.199064000 | 49.766760000 | 42.894338000 |
| 6 | 45.550258000 | 38.171425000 | 34.052248000 | 6  | 44.620682000 | 49.288023000 | 43.240398000 |

|    |              |              |              |
|----|--------------|--------------|--------------|
| 6  | 44.644615000 | 48.154726000 | 44.267731000 |
| 8  | 45.370052000 | 48.942250000 | 42.071770000 |
| 1  | 42.576838000 | 48.244622000 | 41.545029000 |
| 1  | 42.721560000 | 50.188637000 | 43.782618000 |
| 1  | 45.148637000 | 50.155608000 | 43.660446000 |
| 1  | 44.839820000 | 48.321797000 | 41.517082000 |
| 1  | 45.679985000 | 47.885740000 | 44.501006000 |
| 1  | 44.137169000 | 48.453452000 | 45.192799000 |
| 1  | 44.139353000 | 47.262531000 | 43.883591000 |
| 8  | 44.918212000 | 35.792449000 | 41.549451000 |
| 26 | 46.402495000 | 35.191912000 | 41.906248000 |
| 7  | 45.653796000 | 33.534506000 | 42.783157000 |
| 7  | 46.477810000 | 36.112954000 | 43.702809000 |
| 7  | 46.555631000 | 34.189423000 | 40.157559000 |
| 6  | 45.550784000 | 32.057894000 | 40.830819000 |
| 6  | 45.449219000 | 34.364662000 | 45.079877000 |
| 6  | 47.460978000 | 38.254025000 | 43.020036000 |
| 6  | 47.519807000 | 35.963447000 | 38.761959000 |
| 6  | 45.330827000 | 32.355737000 | 42.171835000 |
| 6  | 45.999789000 | 35.625523000 | 44.891025000 |
| 6  | 47.663694000 | 37.962370000 | 41.679805000 |
| 6  | 47.009410000 | 34.686485000 | 38.964532000 |
| 6  | 44.738063000 | 31.444619000 | 43.122030000 |
| 6  | 46.141493000 | 36.617585000 | 45.929749000 |
| 6  | 48.211352000 | 38.886185000 | 40.711539000 |
| 6  | 46.869458000 | 33.693225000 | 37.925356000 |
| 6  | 44.711034000 | 32.093837000 | 44.318764000 |
| 6  | 46.704219000 | 37.713674000 | 45.349473000 |
| 6  | 48.215837000 | 38.243906000 | 39.513268000 |
| 6  | 46.320789000 | 32.592177000 | 38.506667000 |
| 6  | 45.287167000 | 33.398452000 | 44.093688000 |
| 6  | 46.906065000 | 37.386635000 | 43.957816000 |
| 6  | 47.681486000 | 36.922087000 | 39.751636000 |
| 6  | 46.119765000 | 32.914856000 | 39.899595000 |
| 7  | 47.358742000 | 36.767157000 | 41.075553000 |
| 1  | 45.243906000 | 31.076297000 | 40.482187000 |
| 1  | 45.110164000 | 34.115099000 | 46.081019000 |
| 1  | 47.748607000 | 39.242707000 | 43.364778000 |
| 1  | 47.796498000 | 36.250509000 | 37.752297000 |
| 6  | 43.459911000 | 42.643062000 | 34.263964000 |
| 6  | 42.322168000 | 41.942575000 | 36.085677000 |
| 6  | 41.707690000 | 41.713460000 | 37.317605000 |
| 6  | 41.676748000 | 39.690179000 | 35.326724000 |
| 6  | 42.302618000 | 40.914503000 | 35.093764000 |
| 6  | 43.074672000 | 43.047938000 | 35.531587000 |
| 6  | 41.087104000 | 40.470680000 | 37.557438000 |
| 6  | 41.065920000 | 39.469812000 | 36.565842000 |
| 7  | 42.993288000 | 41.384007000 | 33.997319000 |
| 6  | 43.421817000 | 44.346564000 | 36.199465000 |
| 6  | 44.350583000 | 45.201100000 | 35.330343000 |
| 7  | 44.870883000 | 46.343876000 | 36.069047000 |
| 6  | 45.619308000 | 47.276480000 | 35.468937000 |
| 8  | 45.833202000 | 47.275959000 | 34.232423000 |
| 6  | 46.186005000 | 48.357261000 | 36.366264000 |
| 8  | 40.533348000 | 40.331663000 | 38.793142000 |
| 6  | 39.954601000 | 39.077395000 | 39.152087000 |
| 1  | 44.069918000 | 43.141776000 | 33.518864000 |
| 1  | 41.721160000 | 42.448404000 | 38.116324000 |
| 1  | 47.195682000 | 48.609398000 | 36.029347000 |
| 1  | 40.696215000 | 38.270996000 | 39.110947000 |
| 1  | 39.103185000 | 38.829611000 | 38.506918000 |
| 1  | 39.625578000 | 39.195403000 | 40.185045000 |
| 1  | 41.662019000 | 38.914327000 | 34.565550000 |
| 1  | 40.578558000 | 38.521568000 | 36.757404000 |
| 1  | 42.513459000 | 44.920413000 | 36.437426000 |
| 1  | 43.907143000 | 44.160708000 | 37.167850000 |
| 1  | 43.819177000 | 45.554555000 | 34.440126000 |
| 1  | 45.189721000 | 44.593297000 | 34.966614000 |
| 1  | 46.208976000 | 48.044279000 | 37.413425000 |
| 1  | 45.571590000 | 49.262536000 | 36.298118000 |
| 1  | 43.329502000 | 40.864949000 | 33.164958000 |
| 1  | 44.788246000 | 46.344480000 | 37.096527000 |
| 8  | 42.285328000 | 36.343370000 | 40.677803000 |
| 1  | 43.181376000 | 36.023798000 | 40.913383000 |
| 1  | 42.294201000 | 37.291601000 | 40.945181000 |
| 1  | 48.510052000 | 38.602469000 | 38.535799000 |
| 1  | 48.527993000 | 39.896414000 | 40.938660000 |
| 1  | 46.961553000 | 38.662633000 | 45.802877000 |
| 1  | 45.839492000 | 36.478686000 | 46.960273000 |
| 1  | 44.339267000 | 31.740035000 | 45.272195000 |
| 1  | 44.393338000 | 30.445708000 | 42.885974000 |
| 1  | 46.062265000 | 31.644496000 | 38.051122000 |
| 1  | 47.159643000 | 33.841385000 | 36.893008000 |
| 1  | 43.544618000 | 41.164747000 | 43.721711000 |
| 1  | 44.159408000 | 43.537178000 | 39.946706000 |
| 1  | 43.278114000 | 50.556830000 | 42.135022000 |
| 1  | 40.600676000 | 47.144397000 | 41.404942000 |
| 1  | 36.318242000 | 39.502657000 | 33.961428000 |
| 1  | 32.583387000 | 41.612360000 | 35.445103000 |
| 1  | 36.947250000 | 33.471482000 | 38.531949000 |
| 1  | 39.466993000 | 32.281533000 | 42.139127000 |
| 1  | 46.151182000 | 45.584840000 | 29.820449000 |
| 1  | 43.570441000 | 48.688953000 | 31.371635000 |

|   |              |              |              |
|---|--------------|--------------|--------------|
| 1 | 46.827941000 | 51.453993000 | 33.162782000 |
| 1 | 40.772278000 | 50.921251000 | 38.383588000 |
| 1 | 42.572616000 | 54.920716000 | 35.516680000 |
| 1 | 46.668491000 | 54.265680000 | 38.550088000 |
| 1 | 44.587302000 | 37.209520000 | 39.248679000 |
| 1 | 46.654740000 | 40.594174000 | 37.222164000 |
| 1 | 45.347778000 | 37.189982000 | 34.497034000 |
| 1 | 49.787555000 | 37.908575000 | 34.541311000 |
| 1 | 49.204462000 | 35.362303000 | 43.002220000 |

#### 4REII,SH

|   |              |              |              |
|---|--------------|--------------|--------------|
| 6 | 43.271140000 | 47.687145000 | 31.725283000 |
| 6 | 44.073598000 | 46.684278000 | 30.894613000 |
| 8 | 43.813413000 | 46.485492000 | 29.704981000 |
| 6 | 41.751105000 | 47.519570000 | 31.534339000 |
| 6 | 40.998653000 | 48.725446000 | 32.130080000 |
| 6 | 41.268988000 | 46.182169000 | 32.117553000 |
| 6 | 39.492524000 | 48.749028000 | 31.841258000 |
| 1 | 43.543306000 | 47.630345000 | 32.785939000 |
| 1 | 41.576252000 | 47.502252000 | 30.449773000 |
| 1 | 41.158177000 | 48.750035000 | 33.218210000 |
| 1 | 41.447594000 | 49.647889000 | 31.734772000 |
| 1 | 40.207457000 | 46.006764000 | 31.909196000 |
| 1 | 41.829032000 | 45.343837000 | 31.689841000 |
| 1 | 41.401689000 | 46.157527000 | 33.207491000 |
| 1 | 38.973041000 | 47.908925000 | 32.315264000 |
| 1 | 39.035771000 | 49.672245000 | 32.218277000 |
| 1 | 39.296592000 | 48.696839000 | 30.762197000 |
| 7 | 45.088620000 | 46.054900000 | 31.543522000 |
| 6 | 45.999662000 | 45.171426000 | 30.826336000 |
| 6 | 45.519172000 | 43.727385000 | 30.686839000 |
| 8 | 45.551052000 | 43.084708000 | 31.945998000 |
| 1 | 45.293619000 | 46.302030000 | 32.509535000 |
| 1 | 46.960020000 | 45.178517000 | 31.352982000 |
| 1 | 44.508307000 | 43.732770000 | 30.251404000 |
| 1 | 46.185681000 | 43.218754000 | 29.969574000 |
| 1 | 45.271429000 | 42.142233000 | 31.818291000 |
| 6 | 36.169150000 | 38.957426000 | 34.880900000 |
| 6 | 35.070141000 | 39.560445000 | 35.741229000 |
| 8 | 34.788963000 | 39.076964000 | 36.842849000 |
| 6 | 37.486025000 | 38.872797000 | 35.681236000 |
| 8 | 37.382327000 | 37.999933000 | 36.790391000 |
| 1 | 35.864539000 | 37.941299000 | 34.603515000 |
| 1 | 38.276023000 | 38.477193000 | 35.035186000 |
| 1 | 37.790806000 | 39.883630000 | 35.991597000 |
| 1 | 36.555230000 | 38.244395000 | 37.249731000 |
| 7 | 34.431075000 | 40.654961000 | 35.238048000 |
| 6 | 33.508184000 | 41.459517000 | 36.027145000 |
| 6 | 34.108204000 | 42.813256000 | 36.469874000 |
| 6 | 35.367816000 | 42.669973000 | 37.297071000 |
| 6 | 35.299535000 | 42.291266000 | 38.644989000 |
| 6 | 36.630698000 | 42.859860000 | 36.721323000 |
| 6 | 36.460547000 | 42.093555000 | 39.392299000 |
| 6 | 37.797711000 | 42.658076000 | 37.463997000 |
| 6 | 37.715197000 | 42.269153000 | 38.802976000 |
| 1 | 34.787336000 | 41.050873000 | 34.378993000 |
| 1 | 33.249383000 | 40.852595000 | 36.897144000 |
| 1 | 34.314618000 | 43.422747000 | 35.579469000 |
| 1 | 33.331682000 | 43.345520000 | 37.035847000 |
| 1 | 34.327679000 | 42.141364000 | 39.112190000 |
| 1 | 36.704646000 | 43.169870000 | 35.680543000 |
| 1 | 36.386605000 | 41.796224000 | 40.434974000 |
| 1 | 38.769425000 | 42.799288000 | 36.999130000 |
| 1 | 38.623288000 | 42.091099000 | 39.369981000 |
| 6 | 45.955053000 | 53.527691000 | 38.179623000 |
| 6 | 44.646424000 | 54.291132000 | 37.965935000 |
| 8 | 44.241647000 | 55.104629000 | 38.791358000 |
| 6 | 45.809519000 | 52.402675000 | 39.217101000 |
| 6 | 45.075996000 | 51.169644000 | 38.675747000 |
| 7 | 45.056573000 | 50.105967000 | 39.482231000 |
| 8 | 44.543239000 | 51.182757000 | 37.547492000 |
| 1 | 46.341150000 | 53.118465000 | 37.240952000 |
| 1 | 46.799499000 | 52.091867000 | 39.573794000 |
| 1 | 45.270310000 | 52.783769000 | 40.094047000 |
| 1 | 45.442939000 | 50.104964000 | 40.424738000 |
| 1 | 44.541145000 | 49.247697000 | 39.258869000 |
| 7 | 43.986302000 | 54.007973000 | 36.799112000 |
| 6 | 42.645846000 | 54.497209000 | 36.534956000 |
| 6 | 41.494220000 | 53.479900000 | 36.658506000 |
| 8 | 40.365082000 | 53.813301000 | 36.303561000 |
| 1 | 44.302117000 | 53.182696000 | 36.304749000 |
| 1 | 42.456793000 | 55.302994000 | 37.249088000 |
| 7 | 41.822654000 | 52.270310000 | 37.172326000 |
| 6 | 40.875025000 | 51.177174000 | 37.324871000 |
| 6 | 41.329303000 | 49.928090000 | 36.539597000 |
| 6 | 40.462959000 | 48.719906000 | 36.820428000 |
| 6 | 39.257956000 | 48.523329000 | 36.130671000 |
| 6 | 40.832880000 | 47.786734000 | 37.800837000 |
| 6 | 38.442805000 | 47.424480000 | 36.408189000 |
| 6 | 40.018138000 | 46.686232000 | 38.078530000 |
| 6 | 38.819931000 | 46.500213000 | 37.384704000 |
| 1 | 42.794006000 | 52.060312000 | 37.390447000 |
| 1 | 39.904097000 | 51.536806000 | 36.976063000 |



|   |              |              |              |    |              |              |              |
|---|--------------|--------------|--------------|----|--------------|--------------|--------------|
| 1 | 41.318753000 | 50.168410000 | 35.468786000 | 6  | 35.218850000 | 35.429626000 | 37.976489000 |
| 1 | 42.369944000 | 49.713537000 | 36.808556000 | 6  | 35.603993000 | 37.722253000 | 40.161762000 |
| 1 | 38.960483000 | 49.236659000 | 35.364314000 | 1  | 38.708981000 | 34.205558000 | 40.132536000 |
| 1 | 41.764622000 | 47.917246000 | 38.348057000 | 1  | 35.825561000 | 33.472328000 | 39.899202000 |
| 1 | 37.514594000 | 47.287848000 | 35.857845000 | 1  | 37.154820000 | 35.973153000 | 38.722905000 |
| 1 | 40.323391000 | 45.969865000 | 38.837444000 | 1  | 34.806359000 | 35.770704000 | 40.672715000 |
| 1 | 38.191560000 | 45.639882000 | 37.598964000 | 1  | 36.468912000 | 36.026710000 | 41.172229000 |
| 6 | 46.772539000 | 50.485506000 | 32.644187000 | 1  | 34.949859000 | 36.435896000 | 37.641852000 |
| 6 | 48.154808000 | 49.840287000 | 32.630205000 | 1  | 35.600567000 | 34.886151000 | 37.102970000 |
| 7 | 48.202908000 | 48.593395000 | 33.169542000 | 1  | 34.299953000 | 34.926097000 | 38.308043000 |
| 8 | 49.136993000 | 50.415124000 | 32.167237000 | 1  | 35.275937000 | 38.199563000 | 41.093505000 |
| 1 | 46.013059000 | 49.860484000 | 33.121411000 | 1  | 36.557298000 | 38.184861000 | 39.875635000 |
| 1 | 46.471506000 | 50.693342000 | 31.611803000 | 1  | 34.873030000 | 37.974690000 | 39.386146000 |
| 1 | 49.090053000 | 48.110234000 | 33.143113000 | 16 | 48.731123000 | 34.316497000 | 42.285369000 |
| 1 | 47.374635000 | 48.108658000 | 33.524143000 | 6  | 40.351451000 | 47.252914000 | 42.466786000 |
| 6 | 49.257773000 | 38.854532000 | 34.749404000 | 6  | 41.193768000 | 48.354354000 | 43.102274000 |
| 6 | 47.796234000 | 38.494231000 | 35.022165000 | 8  | 40.863163000 | 48.880439000 | 44.169364000 |
| 8 | 47.405129000 | 38.277923000 | 36.188448000 | 6  | 40.489385000 | 45.872987000 | 43.151838000 |
| 6 | 49.515527000 | 39.852768000 | 33.604302000 | 6  | 40.187111000 | 45.799419000 | 44.661844000 |
| 6 | 48.876324000 | 41.247469000 | 33.779170000 | 6  | 38.784548000 | 46.313665000 | 45.015917000 |
| 6 | 49.528262000 | 42.043127000 | 34.920231000 | 6  | 40.393714000 | 44.354984000 | 45.146337000 |
| 6 | 48.923429000 | 42.025165000 | 32.456503000 | 1  | 39.310932000 | 47.591931000 | 42.518546000 |
| 1 | 49.659359000 | 39.226642000 | 35.696546000 | 1  | 39.813418000 | 45.181016000 | 42.625951000 |
| 1 | 50.604162000 | 39.970558000 | 33.496774000 | 1  | 41.502281000 | 45.486981000 | 42.990667000 |
| 1 | 49.170660000 | 39.423872000 | 32.655057000 | 1  | 40.910848000 | 46.441795000 | 45.179697000 |
| 1 | 47.814715000 | 41.106859000 | 34.023324000 | 1  | 38.697814000 | 47.383413000 | 44.804149000 |
| 1 | 49.458069000 | 41.525685000 | 35.884782000 | 1  | 38.009697000 | 45.776767000 | 44.449678000 |
| 1 | 50.592966000 | 42.221875000 | 34.713809000 | 1  | 38.574137000 | 46.165821000 | 46.083349000 |
| 1 | 49.044823000 | 43.019891000 | 35.036974000 | 1  | 41.384360000 | 43.978869000 | 44.865991000 |
| 1 | 49.960714000 | 42.180566000 | 32.125581000 | 1  | 40.290511000 | 44.285234000 | 46.237147000 |
| 1 | 48.375386000 | 41.480822000 | 31.681349000 | 1  | 39.645516000 | 43.683645000 | 44.701177000 |
| 1 | 48.443947000 | 43.003544000 | 32.565650000 | 7  | 42.316726000 | 48.713627000 | 42.416174000 |
| 7 | 46.994180000 | 38.382377000 | 33.952410000 | 6  | 43.201850000 | 49.759954000 | 42.900032000 |
| 6 | 45.552068000 | 38.173771000 | 34.055511000 | 6  | 44.622935000 | 49.278860000 | 43.245033000 |
| 6 | 44.913708000 | 38.277868000 | 32.657763000 | 6  | 44.645788000 | 48.143369000 | 44.269966000 |
| 6 | 45.344512000 | 39.587416000 | 31.953290000 | 8  | 45.371887000 | 48.934939000 | 42.075606000 |
| 8 | 46.536180000 | 39.632626000 | 31.561738000 | 1  | 42.578401000 | 48.240623000 | 41.548044000 |
| 8 | 44.484881000 | 40.521626000 | 31.872651000 | 1  | 42.724777000 | 50.180580000 | 43.789137000 |
| 1 | 47.278724000 | 38.753055000 | 33.038131000 | 1  | 45.151850000 | 50.144964000 | 43.666916000 |
| 1 | 45.116758000 | 38.925317000 | 34.727001000 | 1  | 44.841583000 | 48.315112000 | 41.520284000 |
| 1 | 45.245375000 | 37.429732000 | 32.046586000 | 1  | 45.680904000 | 47.872749000 | 44.502478000 |
| 1 | 43.825280000 | 38.222707000 | 32.760787000 | 1  | 44.138947000 | 48.440770000 | 45.195800000 |
| 6 | 45.867989000 | 41.030475000 | 37.846804000 | 1  | 44.139409000 | 47.252529000 | 43.884167000 |
| 6 | 44.932953000 | 39.986644000 | 38.420826000 | 8  | 44.918715000 | 35.786150000 | 41.544290000 |
| 8 | 44.118144000 | 40.294509000 | 39.317823000 | 26 | 46.410358000 | 35.195114000 | 41.892911000 |
| 1 | 46.313312000 | 41.601049000 | 38.666599000 | 7  | 45.652459000 | 33.535193000 | 42.764380000 |
| 1 | 45.284176000 | 41.727968000 | 37.235846000 | 7  | 46.473005000 | 36.114092000 | 43.692874000 |
| 7 | 45.005773000 | 38.755527000 | 37.892509000 | 7  | 46.567968000 | 34.195672000 | 40.145349000 |
| 6 | 44.162628000 | 37.653508000 | 38.352773000 | 6  | 45.558650000 | 32.062511000 | 40.809563000 |
| 6 | 43.974699000 | 36.593330000 | 37.273296000 | 6  | 45.437374000 | 34.362518000 | 45.061185000 |
| 1 | 45.757350000 | 38.551784000 | 37.230683000 | 6  | 47.460655000 | 38.254948000 | 43.019336000 |
| 1 | 43.194462000 | 38.069564000 | 38.632182000 | 6  | 47.540931000 | 35.970622000 | 38.757697000 |
| 1 | 44.932110000 | 36.160454000 | 36.962555000 | 6  | 45.329140000 | 32.358716000 | 42.149350000 |
| 1 | 43.350186000 | 35.787492000 | 37.671809000 | 6  | 45.989544000 | 35.623440000 | 44.877528000 |
| 1 | 43.480141000 | 37.015761000 | 36.391371000 | 6  | 47.670295000 | 37.964573000 | 41.679916000 |
| 6 | 44.295709000 | 44.025884000 | 40.916115000 | 6  | 47.030673000 | 34.693026000 | 38.955845000 |
| 6 | 43.773133000 | 43.159256000 | 42.063816000 | 6  | 44.726720000 | 31.448289000 | 43.094413000 |
| 8 | 43.548837000 | 43.627161000 | 43.185255000 | 6  | 46.126266000 | 36.613173000 | 45.919439000 |
| 6 | 43.625398000 | 45.400843000 | 40.930114000 | 6  | 48.226038000 | 38.888696000 | 40.716671000 |
| 6 | 44.104438000 | 46.398121000 | 39.865901000 | 6  | 46.899351000 | 33.699948000 | 37.915422000 |
| 8 | 43.820714000 | 47.629965000 | 40.102916000 | 6  | 44.694895000 | 32.095674000 | 44.291910000 |
| 8 | 44.694581000 | 45.963603000 | 38.854226000 | 6  | 46.691388000 | 37.710809000 | 45.344498000 |
| 1 | 45.379161000 | 44.149961000 | 41.047990000 | 6  | 48.236078000 | 38.248707000 | 39.517227000 |
| 1 | 42.541486000 | 45.281517000 | 40.786603000 | 6  | 46.347519000 | 32.598306000 | 38.492484000 |
| 1 | 43.741013000 | 45.845989000 | 41.921670000 | 6  | 45.277550000 | 33.398645000 | 44.072449000 |
| 7 | 43.585540000 | 41.847539000 | 41.769029000 | 6  | 46.899888000 | 37.386765000 | 43.952991000 |
| 6 | 43.073734000 | 40.915575000 | 42.764653000 | 6  | 47.697429000 | 36.927673000 | 39.749893000 |
| 6 | 43.347247000 | 39.451870000 | 42.401055000 | 6  | 46.135552000 | 32.920259000 | 39.883984000 |
| 6 | 42.959000000 | 38.517342000 | 43.542070000 | 7  | 47.365241000 | 36.771383000 | 41.071238000 |
| 8 | 42.587665000 | 39.064346000 | 41.247114000 | 1  | 45.253274000 | 31.081856000 | 40.456992000 |
| 1 | 43.764085000 | 41.511545000 | 40.825218000 | 1  | 45.092961000 | 34.111628000 | 46.060182000 |
| 1 | 41.988761000 | 41.044415000 | 42.890821000 | 1  | 47.748043000 | 39.242748000 | 43.366805000 |
| 1 | 44.419079000 | 39.330343000 | 42.186023000 | 1  | 47.823627000 | 36.258835000 | 37.750071000 |
| 1 | 43.043204000 | 39.425567000 | 40.451615000 | 6  | 43.460439000 | 42.639030000 | 34.267291000 |
| 1 | 41.890094000 | 38.612680000 | 43.768262000 | 6  | 42.324325000 | 41.937029000 | 36.089372000 |
| 1 | 43.166250000 | 37.481087000 | 43.260619000 | 6  | 41.710509000 | 41.707024000 | 37.321340000 |
| 1 | 43.530434000 | 38.747851000 | 44.447603000 | 6  | 41.679051000 | 39.684820000 | 35.329305000 |
| 6 | 38.947330000 | 33.217091000 | 42.421623000 | 6  | 42.304696000 | 40.909436000 | 35.096839000 |
| 6 | 37.646316000 | 33.320446000 | 41.616349000 | 6  | 43.076057000 | 43.043049000 | 35.535378000 |
| 8 | 36.588372000 | 32.870905000 | 42.059322000 | 6  | 41.089817000 | 40.463987000 | 37.560522000 |
| 6 | 39.964112000 | 34.358535000 | 42.278853000 | 6  | 41.068382000 | 39.463722000 | 36.568349000 |
| 6 | 41.118161000 | 34.206539000 | 43.274429000 | 7  | 42.994431000 | 41.379830000 | 34.000311000 |
| 8 | 40.447637000 | 34.345976000 | 40.938979000 | 6  | 43.423188000 | 44.341558000 | 36.203519000 |
| 1 | 38.648569000 | 33.108482000 | 43.468559000 | 6  | 44.350166000 | 45.197039000 | 35.333498000 |
| 1 | 39.449293000 | 35.314165000 | 42.483071000 | 7  | 44.871126000 | 46.339464000 | 36.072144000 |
| 1 | 41.073911000 | 35.107357000 | 40.829532000 | 6  | 45.619122000 | 47.272103000 | 35.471475000 |
| 1 | 41.620642000 | 33.241979000 | 43.135117000 | 8  | 45.831456000 | 47.272031000 | 34.234681000 |
| 1 | 41.857493000 | 34.997283000 | 43.113565000 | 6  | 46.187414000 | 48.352233000 | 36.368523000 |
| 1 | 40.760417000 | 34.270097000 | 44.309989000 | 8  | 40.535761000 | 40.324558000 | 38.795835000 |
| 7 | 37.771070000 | 33.896856000 | 40.388781000 | 6  | 39.956371000 | 39.070315000 | 39.154038000 |
| 6 | 36.669145000 | 34.005582000 | 39.449626000 | 1  | 44.069578000 | 43.138350000 | 33.521893000 |
| 6 | 36.262099000 | 35.454675000 | 39.104997000 | 1  | 41.724134000 | 42.441328000 | 38.120649000 |
| 6 | 35.763635000 | 36.208613000 | 40.352255000 | 1  | 47.197083000 | 48.603579000 | 36.030972000 |

|   |              |              |              |    |               |               |              |
|---|--------------|--------------|--------------|----|---------------|---------------|--------------|
| 1 | 40.697554000 | 38.263588000 | 39.111957000 | 1  | -15.553665000 | -34.868057000 | 28.435445000 |
| 1 | 39.104779000 | 38.823759000 | 38.508642000 | 1  | -19.919255000 | -37.119911000 | 30.019886000 |
| 1 | 39.627798000 | 39.187812000 | 40.187166000 | 1  | -17.041051000 | -39.234171000 | 26.488017000 |
| 1 | 41.663782000 | 38.909586000 | 34.567525000 | 1  | -19.147429000 | -40.331416000 | 27.261463000 |
| 1 | 40.580311000 | 38.515681000 | 36.759162000 | 1  | -18.573931000 | -35.264942000 | 30.985969000 |
| 1 | 42.514753000 | 44.914703000 | 36.442883000 | 1  | -18.742346000 | -34.049836000 | 29.735474000 |
| 1 | 43.909819000 | 44.155725000 | 37.171263000 | 1  | -16.240707000 | -34.467363000 | 31.460187000 |
| 1 | 43.817105000 | 45.550796000 | 34.444361000 | 1  | -16.417241000 | -33.231643000 | 30.199765000 |
| 1 | 45.188961000 | 44.589812000 | 34.968032000 | 1  | -17.938213000 | -30.059790000 | 33.055006000 |
| 1 | 46.210842000 | 48.039023000 | 37.415599000 | 1  | -18.835389000 | -31.535384000 | 33.561183000 |
| 1 | 45.573733000 | 49.258032000 | 36.300999000 | 1  | -19.485401000 | -30.456867000 | 32.304028000 |
| 1 | 43.330148000 | 40.861691000 | 33.166884000 | 1  | -22.113046000 | -40.013289000 | 30.421847000 |
| 1 | 44.789428000 | 46.339755000 | 37.099666000 | 1  | -21.847746000 | -38.254333000 | 30.297669000 |
| 8 | 42.282902000 | 36.338287000 | 40.683467000 | 1  | -20.603932000 | -39.298023000 | 31.062436000 |
| 1 | 43.178302000 | 36.018869000 | 40.921710000 | 16 | -18.292690000 | -45.043893000 | 32.041310000 |
| 1 | 42.290540000 | 37.287117000 | 40.948610000 | 6  | -16.722876000 | -40.870177000 | 21.457497000 |
| 1 | 48.536926000 | 38.608861000 | 38.542407000 | 6  | -15.199318000 | -40.842036000 | 21.505400000 |
| 1 | 48.543888000 | 39.897675000 | 40.947579000 | 8  | -14.542974000 | -41.885624000 | 21.361484000 |
| 1 | 46.946695000 | 38.658584000 | 45.801512000 | 6  | -17.363696000 | -41.695916000 | 22.596266000 |
| 1 | 45.819667000 | 36.471738000 | 46.948260000 | 6  | -18.826260000 | -42.029934000 | 22.237430000 |
| 1 | 44.315512000 | 31.741919000 | 45.242355000 | 6  | -17.241057000 | -40.964757000 | 23.940918000 |
| 1 | 44.379122000 | 30.451263000 | 42.854582000 | 6  | -19.529441000 | -42.965701000 | 23.227798000 |
| 1 | 46.092967000 | 31.650625000 | 38.034701000 | 1  | -17.134354000 | -39.852164000 | 21.458921000 |
| 1 | 47.196717000 | 33.848682000 | 36.885193000 | 1  | -16.807499000 | -42.642045000 | 22.658518000 |
| 1 | 43.539014000 | 41.161086000 | 43.725601000 | 1  | -19.397968000 | -41.093246000 | 22.154945000 |
| 1 | 44.157091000 | 43.531787000 | 39.949421000 | 1  | -18.847559000 | -42.491178000 | 21.239244000 |
| 1 | 43.281945000 | 50.551584000 | 42.142432000 | 1  | -17.600051000 | -41.583242000 | 24.770264000 |
| 1 | 40.600202000 | 47.144739000 | 41.403896000 | 1  | -16.207999000 | -40.690824000 | 24.178245000 |
| 1 | 36.328879000 | 39.529261000 | 33.958117000 | 1  | -17.840230000 | -40.043445000 | 23.936038000 |
| 1 | 32.592551000 | 41.633319000 | 35.446824000 | 1  | -20.536675000 | -43.220659000 | 22.877244000 |
| 1 | 36.937527000 | 33.482195000 | 38.519900000 | 1  | -18.971570000 | -43.903804000 | 23.347161000 |
| 1 | 39.449026000 | 32.283051000 | 42.129213000 | 1  | -19.630699000 | -42.509746000 | 24.218126000 |
| 1 | 46.146833000 | 45.583316000 | 29.821879000 | 7  | -14.633621000 | -39.622355000 | 21.649236000 |
| 1 | 43.566903000 | 48.687217000 | 31.377060000 | 6  | -13.202675000 | -39.381263000 | 21.772567000 |
| 1 | 46.835553000 | 51.446753000 | 33.164701000 | 6  | -12.867877000 | -38.866475000 | 23.172571000 |
| 1 | 40.776185000 | 50.921520000 | 38.388328000 | 8  | -13.698106000 | -37.754023000 | 23.456485000 |
| 1 | 42.579667000 | 54.923178000 | 35.527525000 | 1  | -15.205092000 | -38.856226000 | 21.985297000 |
| 1 | 46.676556000 | 54.259444000 | 38.556867000 | 1  | -12.911182000 | -38.634243000 | 21.022208000 |
| 1 | 44.592328000 | 37.204022000 | 39.255483000 | 1  | -13.037839000 | -39.665273000 | 23.902432000 |
| 1 | 46.655614000 | 40.592255000 | 37.229485000 | 1  | -11.799630000 | -38.589555000 | 23.200523000 |
| 1 | 45.350531000 | 37.193187000 | 34.502677000 | 1  | -13.965740000 | -37.844762000 | 24.409839000 |
| 1 | 49.789794000 | 37.915193000 | 34.539151000 | 6  | -12.598457000 | -42.914241000 | 24.653778000 |
| 1 | 49.196387000 | 35.362523000 | 43.005243000 | 6  | -11.974574000 | -43.853540000 | 23.627212000 |

## 2REIII,SH

|    |               |               |              |   |               |               |              |
|----|---------------|---------------|--------------|---|---------------|---------------|--------------|
| 6  | -20.474266000 | -43.437873000 | 29.121338000 | 6 | -13.557571000 | -43.656573000 | 25.598969000 |
| 6  | -21.102254000 | -42.304956000 | 33.781811000 | 8 | -13.993532000 | -42.848848000 | 26.679343000 |
| 6  | -16.317675000 | -41.847868000 | 34.296347000 | 1 | -11.784778000 | -42.494608000 | 25.256743000 |
| 6  | -15.704351000 | -42.822686000 | 29.596855000 | 1 | -14.411757000 | -44.040475000 | 25.015240000 |
| 6  | -21.060178000 | -43.208521000 | 30.361674000 | 1 | -13.040060000 | -44.521169000 | 26.026617000 |
| 6  | -22.478095000 | -43.276312000 | 30.615570000 | 1 | -14.240634000 | -41.950738000 | 26.337424000 |
| 6  | -22.658830000 | -42.958793000 | 31.928160000 | 7 | -12.323450000 | -43.613720000 | 22.328438000 |
| 6  | -21.346464000 | -42.695651000 | 32.471597000 | 6 | -11.847640000 | -44.442593000 | 21.237315000 |
| 6  | -19.844299000 | -42.064544000 | 34.327329000 | 6 | -12.981807000 | -44.919510000 | 20.303906000 |
| 6  | -19.613517000 | -41.687078000 | 35.701033000 | 6 | -13.971220000 | -45.857895000 | 20.960220000 |
| 6  | -18.265157000 | -41.576912000 | 35.851728000 | 6 | -13.733943000 | -47.238644000 | 21.001656000 |
| 6  | -17.681552000 | -41.876099000 | 34.565613000 | 6 | -15.136859000 | -45.361531000 | 21.561028000 |
| 6  | -15.730079000 | -42.081363000 | 33.058973000 | 6 | -14.632244000 | -48.103798000 | 21.628044000 |
| 6  | -14.311803000 | -42.006183000 | 32.802549000 | 6 | -16.037034000 | -46.224551000 | 22.189397000 |
| 6  | -14.141402000 | -42.267182000 | 31.476536000 | 6 | -15.788780000 | -47.598233000 | 22.225600000 |
| 6  | -15.455600000 | -42.506847000 | 30.930774000 | 1 | -13.010500000 | -42.893781000 | 22.112427000 |
| 6  | -16.957643000 | -43.089803000 | 29.066232000 | 1 | -11.328134000 | -45.290241000 | 21.692028000 |
| 6  | -17.189662000 | -43.427930000 | 27.681446000 | 1 | -13.508199000 | -44.038498000 | 19.917514000 |
| 6  | -18.530713000 | -43.610882000 | 27.548284000 | 1 | -12.512308000 | -45.416215000 | 19.443602000 |
| 6  | -19.118135000 | -43.379832000 | 28.848129000 | 1 | -12.833521000 | -47.639466000 | 20.539136000 |
| 7  | -20.386242000 | -42.867824000 | 31.504321000 | 1 | -15.327079000 | -44.291662000 | 21.531776000 |
| 7  | -18.658183000 | -42.172450000 | 33.654336000 | 1 | -14.429070000 | -49.172056000 | 21.649873000 |
| 7  | -16.406835000 | -42.395035000 | 31.909510000 | 1 | -16.934622000 | -45.821830000 | 22.652983000 |
| 7  | -18.140355000 | -43.076536000 | 29.766435000 | 1 | -16.489666000 | -48.268885000 | 22.716513000 |
| 26 | -18.409203000 | -42.492580000 | 31.681878000 | 6 | -27.359469000 | -41.377546000 | 32.915880000 |
| 1  | -21.965107000 | -42.152976000 | 34.423048000 | 6 | -27.762386000 | -40.974742000 | 31.502102000 |
| 1  | -15.655505000 | -41.598721000 | 35.120260000 | 8 | -28.576200000 | -41.640788000 | 30.837515000 |
| 1  | -14.863476000 | -42.873074000 | 28.909415000 | 6 | -27.365210000 | -42.905677000 | 33.108293000 |
| 1  | -21.138323000 | -43.679335000 | 28.296887000 | 8 | -28.656653000 | -43.448460000 | 32.877201000 |
| 6  | -16.317215000 | -35.633962000 | 28.457653000 | 6 | -26.933267000 | -43.289244000 | 34.518827000 |
| 6  | -18.120223000 | -36.933002000 | 28.825077000 | 1 | -26.373076000 | -40.974938000 | 33.166342000 |
| 6  | -19.305793000 | -37.568626000 | 29.246489000 | 1 | -26.640440000 | -43.336410000 | 32.392217000 |
| 6  | -17.670518000 | -38.763525000 | 27.237796000 | 1 | -28.934654000 | -43.042034000 | 32.028644000 |
| 6  | -17.315832000 | -37.541291000 | 27.826819000 | 1 | -26.940161000 | -44.379036000 | 34.630505000 |
| 6  | -17.468376000 | -35.706780000 | 29.215096000 | 1 | -25.926605000 | -42.913597000 | 34.732490000 |
| 6  | -19.648905000 | -38.786083000 | 28.668589000 | 1 | -27.629344000 | -42.868378000 | 35.254477000 |
| 6  | -18.840054000 | -39.372279000 | 27.666053000 | 7 | -27.194834000 | -39.843975000 | 31.022104000 |
| 7  | -16.224196000 | -36.724647000 | 27.611967000 | 6 | -27.524204000 | -39.332676000 | 29.698981000 |
| 1  | -15.419179000 | -36.988149000 | 27.044288000 | 6 | -26.660191000 | -39.911070000 | 28.557289000 |
| 6  | -18.013161000 | -34.720644000 | 30.214845000 | 6 | -25.175727000 | -39.530001000 | 28.716493000 |
| 6  | -16.963105000 | -33.844113000 | 30.921738000 | 6 | -27.239560000 | -39.462563000 | 27.207232000 |
| 7  | -17.589734000 | -32.937846000 | 31.879289000 | 6 | -24.219875000 | -40.262462000 | 27.766117000 |
| 6  | -17.844716000 | -31.648229000 | 31.625700000 | 1 | -26.538224000 | -39.322312000 | 31.607555000 |
| 8  | -17.508293000 | -31.068794000 | 30.563609000 | 1 | -27.420172000 | -38.239830000 | 29.724470000 |
| 6  | -18.570003000 | -30.890496000 | 32.722137000 | 1 | -26.747255000 | -41.004835000 | 28.624237000 |
| 1  | -17.972379000 | -33.337450000 | 32.748407000 | 1 | -25.069341000 | -38.442730000 | 28.575266000 |
| 8  | -20.776105000 | -39.505056000 | 29.002582000 | 1 | -24.869941000 | -39.733154000 | 29.750862000 |
| 6  | -21.357603000 | -39.237988000 | 30.269202000 | 1 | -26.690060000 | -39.897318000 | 26.365954000 |
|    |               |               |              | 1 | -28.289921000 | -39.763380000 | 27.108526000 |



|    |               |               |              |   |               |               |              |
|----|---------------|---------------|--------------|---|---------------|---------------|--------------|
| 7  | -18.140049000 | -43.065531000 | 29.766331000 | 6 | -27.358800000 | -41.375215000 | 32.911135000 |
| 26 | -18.408528000 | -42.493587000 | 31.680998000 | 6 | -27.760771000 | -40.971688000 | 31.497254000 |
| 1  | -21.964712000 | -42.142823000 | 34.422419000 | 8 | -28.573821000 | -41.637555000 | 30.831552000 |
| 1  | -15.653614000 | -41.606979000 | 35.122884000 | 6 | -27.366550000 | -42.903351000 | 33.103327000 |
| 1  | -14.862828000 | -42.864676000 | 28.908468000 | 8 | -28.658585000 | -43.444425000 | 32.871461000 |
| 1  | -21.136315000 | -43.684979000 | 28.300339000 | 6 | -26.935902000 | -43.287755000 | 34.514010000 |
| 6  | -16.317429000 | -35.641202000 | 28.464555000 | 1 | -26.371916000 | -40.973907000 | 33.161789000 |
| 6  | -18.117865000 | -36.943011000 | 28.834177000 | 1 | -26.641971000 | -43.334898000 | 32.387569000 |
| 6  | -19.302559000 | -37.579660000 | 29.256062000 | 1 | -28.935370000 | -43.037894000 | 32.022562000 |
| 6  | -17.665650000 | -38.774516000 | 27.248457000 | 1 | -26.944260000 | -44.377552000 | 34.625449000 |
| 6  | -17.312661000 | -37.551153000 | 27.836292000 | 1 | -25.928854000 | -42.913517000 | 34.728363000 |
| 6  | -17.467958000 | -35.715254000 | 29.222688000 | 1 | -27.631847000 | -42.866136000 | 35.249357000 |
| 6  | -19.644446000 | -38.797879000 | 28.678731000 | 7 | -27.193033000 | -39.840566000 | 31.018313000 |
| 6  | -18.834538000 | -39.384235000 | 27.676981000 | 6 | -27.520908000 | -39.328973000 | 29.694960000 |
| 7  | -16.222588000 | -36.732930000 | 27.620348000 | 6 | -26.656350000 | -39.908211000 | 28.554121000 |
| 1  | -15.417888000 | -36.994498000 | 27.051245000 | 6 | -25.171566000 | -39.529318000 | 28.715395000 |
| 6  | -18.013871000 | -34.728737000 | 30.221445000 | 6 | -27.233351000 | -39.458440000 | 27.203473000 |
| 6  | -16.965070000 | -33.847071000 | 30.923802000 | 6 | -24.215486000 | -40.263327000 | 27.766426000 |
| 7  | -17.592563000 | -32.939968000 | 31.879931000 | 1 | -26.537306000 | -39.318828000 | 31.604685000 |
| 6  | -17.848456000 | -31.650875000 | 31.624666000 | 1 | -27.415818000 | -38.236247000 | 29.720596000 |
| 8  | -17.512405000 | -31.072485000 | 30.561895000 | 1 | -26.745082000 | -41.001860000 | 28.620652000 |
| 6  | -18.574422000 | -30.892284000 | 32.720090000 | 1 | -25.063344000 | -38.442210000 | 28.574284000 |
| 1  | -17.975008000 | -33.338741000 | 32.749558000 | 1 | -24.867568000 | -39.732900000 | 29.750201000 |
| 8  | -20.771698000 | -39.516988000 | 29.011770000 | 1 | -26.683394000 | -39.893729000 | 26.362765000 |
| 6  | -21.356826000 | -39.247340000 | 30.276174000 | 1 | -28.284015000 | -39.757708000 | 27.103297000 |
| 1  | -15.555353000 | -34.873891000 | 28.440940000 | 1 | -27.184778000 | -38.365513000 | 27.099461000 |
| 1  | -19.916674000 | -37.130910000 | 30.028895000 | 1 | -23.173382000 | -39.989185000 | 27.962558000 |
| 1  | -17.035610000 | -39.244988000 | 26.499053000 | 1 | -24.303621000 | -41.350732000 | 27.890879000 |
| 1  | -19.141061000 | -40.343784000 | 27.272750000 | 1 | -24.424736000 | -40.033326000 | 26.714960000 |
| 1  | -18.571152000 | -35.273103000 | 30.995054000 | 6 | -26.039651000 | -36.165346000 | 31.969828000 |
| 1  | -18.746355000 | -34.061562000 | 29.742050000 | 6 | -25.164047000 | -37.085162000 | 32.826652000 |
| 1  | -16.239784000 | -34.466736000 | 31.462531000 | 8 | -25.308173000 | -38.326280000 | 32.724667000 |
| 1  | -16.422482000 | -33.234972000 | 30.199054000 | 6 | -25.610056000 | -34.696919000 | 31.821263000 |
| 1  | -17.942431000 | -30.061765000 | 33.053077000 | 6 | -24.332801000 | -34.477266000 | 30.974798000 |
| 1  | -18.840752000 | -31.536579000 | 33.559293000 | 6 | -24.640004000 | -34.548843000 | 29.471127000 |
| 1  | -19.489210000 | -30.458341000 | 32.301001000 | 6 | -23.650405000 | -33.153136000 | 31.347267000 |
| 1  | -22.113331000 | -40.021793000 | 30.427702000 | 1 | -26.108266000 | -36.644678000 | 30.986795000 |
| 1  | -21.846165000 | -38.263235000 | 30.301564000 | 1 | -26.439119000 | -34.140505000 | 31.360977000 |
| 1  | -20.605439000 | -39.306515000 | 31.071690000 | 1 | -25.483797000 | -34.246148000 | 32.814950000 |
| 16 | -18.290626000 | -45.020623000 | 32.062290000 | 1 | -23.624194000 | -35.282746000 | 31.210281000 |
| 6  | -16.722305000 | -40.865942000 | 21.459134000 | 1 | -23.720823000 | -34.469449000 | 28.879685000 |
| 6  | -15.198741000 | -40.837162000 | 21.505987000 | 1 | -25.127916000 | -35.491547000 | 29.193494000 |
| 8  | -14.542012000 | -41.880075000 | 21.358803000 | 1 | -25.304624000 | -33.727431000 | 29.169409000 |
| 6  | -17.361784000 | -41.693468000 | 22.597423000 | 1 | -22.783725000 | -32.962762000 | 30.703690000 |
| 6  | -18.824352000 | -42.028146000 | 22.239268000 | 1 | -24.342368000 | -32.306231000 | 31.237158000 |
| 6  | -17.238784000 | -40.963779000 | 23.942842000 | 1 | -23.294059000 | -33.182347000 | 32.382981000 |
| 6  | -19.526194000 | -42.965223000 | 23.229348000 | 7 | -24.317014000 | -36.501787000 | 33.672399000 |
| 1  | -17.134308000 | -39.848146000 | 21.462167000 | 6 | -23.347967000 | -37.128647000 | 34.571456000 |
| 1  | -16.804858000 | -42.639258000 | 22.658256000 | 6 | -22.083285000 | -36.244869000 | 34.569718000 |
| 1  | -19.396749000 | -41.091774000 | 22.157990000 | 8 | -22.552435000 | -34.904380000 | 34.631245000 |
| 1  | -18.845991000 | -42.488523000 | 21.240690000 | 6 | -21.205310000 | -36.472825000 | 33.334846000 |
| 1  | -17.596972000 | -41.583454000 | 24.771652000 | 1 | -24.211792000 | -35.491258000 | 33.682077000 |
| 1  | -16.205719000 | -40.689600000 | 24.179871000 | 1 | -23.143584000 | -38.151572000 | 34.249680000 |
| 1  | -17.838449000 | -40.042795000 | 23.939361000 | 1 | -21.499283000 | -36.483380000 | 35.469813000 |
| 1  | -20.533540000 | -43.220470000 | 22.879339000 | 1 | -21.791424000 | -34.339826000 | 34.975672000 |
| 1  | -18.967639000 | -43.903083000 | 23.347413000 | 1 | -20.391122000 | -35.741482000 | 33.334898000 |
| 1  | -19.626923000 | -42.510291000 | 24.220199000 | 1 | -20.776048000 | -37.483260000 | 33.333565000 |
| 7  | -14.633475000 | -39.617666000 | 21.652543000 | 1 | -21.787795000 | -36.341550000 | 32.413023000 |
| 6  | -13.202554000 | -39.376147000 | 21.775330000 | 6 | -17.291927000 | -24.991026000 | 31.777296000 |
| 6  | -12.867290000 | -38.863122000 | 23.175880000 | 6 | -15.873288000 | -24.865405000 | 31.213353000 |
| 8  | -13.698080000 | -37.751544000 | 23.461629000 | 8 | -15.617666000 | -24.107653000 | 30.282233000 |
| 1  | -15.205072000 | -38.852390000 | 21.990323000 | 6 | -18.136869000 | -26.005028000 | 30.987380000 |
| 1  | -12.911802000 | -38.628009000 | 21.025803000 | 6 | -17.681153000 | -27.454864000 | 31.195511000 |
| 1  | -13.036388000 | -39.663058000 | 23.904696000 | 8 | -16.893035000 | -27.756787000 | 32.108005000 |
| 1  | -11.799209000 | -38.585572000 | 23.203743000 | 7 | -18.176502000 | -28.366301000 | 30.341843000 |
| 1  | -13.964551000 | -37.843106000 | 24.415218000 | 1 | -17.275661000 | -25.281686000 | 32.832086000 |
| 6  | -12.600440000 | -42.914163000 | 24.650404000 | 1 | -19.186703000 | -25.930702000 | 31.302959000 |
| 6  | -11.976340000 | -43.852574000 | 23.623143000 | 1 | -18.111891000 | -25.759173000 | 29.918457000 |
| 8  | -11.212391000 | -44.757895000 | 23.958677000 | 1 | -18.816012000 | -28.088715000 | 29.611092000 |
| 6  | -13.558638000 | -43.657535000 | 25.595625000 | 1 | -17.931251000 | -29.374957000 | 30.440967000 |
| 8  | -13.994062000 | -42.850927000 | 26.677013000 | 7 | -14.942050000 | -25.662698000 | 31.824362000 |
| 1  | -11.786746000 | -42.494254000 | 25.253193000 | 6 | -13.618335000 | -25.856642000 | 31.260808000 |
| 1  | -14.413122000 | -44.041165000 | 25.012115000 | 6 | -13.405266000 | -27.090080000 | 30.357006000 |
| 1  | -13.040588000 | -44.522401000 | 26.022077000 | 8 | -12.405206000 | -27.138049000 | 29.643925000 |
| 1  | -14.239365000 | -41.951818000 | 26.336518000 | 1 | -15.320841000 | -26.373179000 | 32.441560000 |
| 7  | -12.324003000 | -43.610912000 | 22.324448000 | 1 | -13.390067000 | -24.981902000 | 30.650152000 |
| 6  | -11.847150000 | -44.438171000 | 21.232518000 | 7 | -14.328710000 | -28.080733000 | 30.436765000 |
| 6  | -12.980360000 | -44.912838000 | 20.296824000 | 6 | -14.283621000 | -29.252064000 | 29.567564000 |
| 6  | -13.971050000 | -45.852035000 | 20.950072000 | 6 | -14.923679000 | -28.971228000 | 28.190098000 |
| 6  | -13.734144000 | -47.232902000 | 20.989724000 | 6 | -14.934966000 | -30.176871000 | 27.274907000 |
| 6  | -15.137515000 | -45.356345000 | 21.549810000 | 6 | -15.832612000 | -31.234844000 | 27.495021000 |
| 6  | -14.633678000 | -48.098835000 | 21.613249000 | 6 | -14.050809000 | -30.263889000 | 26.191398000 |
| 6  | -16.038927000 | -46.220153000 | 22.175322000 | 6 | -15.848889000 | -32.341501000 | 26.643666000 |
| 6  | -15.791075000 | -47.593946000 | 22.209715000 | 6 | -14.065043000 | -31.370910000 | 25.338752000 |
| 1  | -13.010667000 | -42.890486000 | 22.108839000 | 6 | -14.967070000 | -32.413213000 | 25.561170000 |
| 1  | -11.328672000 | -45.286874000 | 21.686434000 | 1 | -15.144589000 | -27.976932000 | 31.031552000 |
| 1  | -13.505870000 | -44.030852000 | 19.911457000 | 1 | -14.819321000 | -30.062510000 | 30.070455000 |
| 1  | -12.510049000 | -45.408116000 | 19.436140000 | 1 | -15.950494000 | -28.623122000 | 28.360959000 |
| 1  | -12.833055000 | -47.633191000 | 20.528046000 | 1 | -14.372831000 | -28.147190000 | 27.723020000 |
| 1  | -15.327338000 | -44.286368000 | 21.522075000 | 1 | -16.516141000 | -31.195764000 | 28.341227000 |
| 1  | -14.430786000 | -49.167172000 | 21.633746000 | 1 | -13.349332000 | -29.451521000 | 26.011612000 |
| 1  | -16.937158000 | -45.817962000 | 22.638126000 | 1 | -16.549977000 | -33.151331000 | 26.827592000 |
| 1  | -16.492908000 | -48.265212000 | 22.698432000 | 1 | -13.376318000 | -31.415105000 | 24.498066000 |

|   |               |               |              |
|---|---------------|---------------|--------------|
| 1 | -14.984708000 | -33.274445000 | 24.898209000 |
| 6 | -18.508047000 | -34.626866000 | 37.599093000 |
| 6 | -18.431708000 | -36.113063000 | 37.237207000 |
| 8 | -19.373401000 | -36.888217000 | 37.402567000 |
| 6 | -18.252384000 | -33.668698000 | 36.417873000 |
| 6 | -19.367672000 | -33.760062000 | 35.349149000 |
| 8 | -20.543833000 | -33.698513000 | 35.802063000 |
| 8 | -19.026927000 | -33.884494000 | 34.139094000 |
| 1 | -19.513966000 | -34.446907000 | 37.981386000 |
| 1 | -18.243829000 | -32.641280000 | 36.808031000 |
| 1 | -17.278312000 | -33.843416000 | 35.948339000 |
| 7 | -17.221534000 | -36.517255000 | 36.753969000 |
| 6 | -16.965566000 | -37.831483000 | 36.195430000 |
| 6 | -16.245123000 | -37.699931000 | 34.845134000 |
| 8 | -15.098473000 | -36.883767000 | 35.100531000 |
| 6 | -17.135519000 | -37.131004000 | 33.740478000 |
| 1 | -16.504278000 | -35.833939000 | 36.546420000 |
| 1 | -17.920768000 | -38.352170000 | 36.092747000 |
| 1 | -15.919645000 | -38.711588000 | 34.545327000 |
| 1 | -14.810395000 | -36.456790000 | 34.263512000 |
| 1 | -16.558796000 | -37.009677000 | 32.817048000 |
| 1 | -17.963399000 | -37.817372000 | 33.528580000 |
| 1 | -17.553854000 | -36.157240000 | 34.017152000 |
| 6 | -12.903034000 | -34.921409000 | 30.875521000 |
| 6 | -13.201851000 | -35.904322000 | 31.995390000 |
| 8 | -14.117339000 | -35.669733000 | 32.798559000 |
| 1 | -12.902476000 | -33.908899000 | 31.288418000 |
| 1 | -13.711972000 | -34.973845000 | 30.138452000 |
| 7 | -12.417669000 | -37.003899000 | 32.026913000 |
| 6 | -12.576020000 | -38.095451000 | 32.980248000 |
| 6 | -11.215503000 | -38.590984000 | 33.474844000 |
| 1 | -11.758741000 | -37.147078000 | 31.257158000 |
| 1 | -13.126486000 | -38.924504000 | 32.510641000 |
| 1 | -11.344170000 | -39.439305000 | 34.157644000 |
| 1 | -10.586186000 | -38.918918000 | 32.638844000 |
| 1 | -10.682431000 | -37.796817000 | 34.009131000 |
| 6 | -9.851094000  | -36.802217000 | 27.566030000 |
| 6 | -10.891995000 | -37.369145000 | 28.537263000 |
| 8 | -10.631026000 | -37.402333000 | 29.752180000 |
| 6 | -10.306701000 | -36.352247000 | 26.167428000 |
| 6 | -11.260738000 | -35.139016000 | 26.109096000 |
| 6 | -10.613909000 | -33.860690000 | 26.664638000 |
| 6 | -11.746756000 | -34.921405000 | 24.667687000 |
| 1 | -9.355936000  | -35.986309000 | 28.101713000 |
| 1 | -9.405198000  | -36.108097000 | 25.585914000 |
| 1 | -10.769056000 | -37.198208000 | 25.639548000 |
| 1 | -12.142693000 | -35.362870000 | 26.725675000 |
| 1 | -11.312744000 | -33.018542000 | 26.605760000 |
| 1 | -10.315697000 | -33.966047000 | 27.713980000 |
| 1 | -9.717893000  | -33.593611000 | 26.086668000 |
| 1 | -12.419928000 | -34.057731000 | 24.615009000 |
| 1 | -10.898137000 | -34.721653000 | 23.997618000 |
| 1 | -12.288287000 | -35.793673000 | 24.282912000 |
| 7 | -12.020119000 | -37.866589000 | 27.999040000 |
| 6 | -13.110152000 | -38.488722000 | 28.746081000 |
| 6 | -13.714113000 | -39.655565000 | 27.958642000 |
| 6 | -14.111173000 | -39.336782000 | 26.503827000 |
| 8 | -14.043265000 | -38.116434000 | 26.125315000 |
| 8 | -14.459205000 | -40.299444000 | 25.776737000 |
| 1 | -12.260367000 | -37.685358000 | 27.029800000 |
| 1 | -13.883789000 | -37.743465000 | 28.965536000 |
| 1 | -13.022873000 | -40.506339000 | 27.924705000 |
| 1 | -14.612921000 | -40.010542000 | 28.478516000 |
| 8 | -18.546840000 | -40.908606000 | 31.331418000 |
| 1 | -13.560593000 | -41.781566000 | 33.552358000 |
| 1 | -13.221865000 | -42.294150000 | 30.904234000 |
| 1 | -20.390712000 | -41.505888000 | 36.434259000 |
| 1 | -17.702981000 | -41.296138000 | 36.737052000 |
| 1 | -23.578170000 | -42.896515000 | 32.495665000 |
| 1 | -23.223329000 | -43.541613000 | 29.880609000 |
| 1 | -19.089994000 | -43.882093000 | 26.664836000 |
| 1 | -16.396384000 | -43.487830000 | 26.948764000 |
| 1 | -16.329961000 | -38.414084000 | 36.880290000 |
| 1 | -23.776133000 | -37.164497000 | 35.581241000 |
| 1 | -27.050017000 | -36.221940000 | 32.398827000 |
| 1 | -28.086878000 | -40.937064000 | 33.609118000 |
| 1 | -28.572856000 | -39.562273000 | 29.502079000 |
| 1 | -11.111460000 | -43.883269000 | 20.629416000 |
| 1 | -13.130557000 | -42.082606000 | 24.175077000 |
| 1 | -16.981546000 | -41.317625000 | 20.492473000 |
| 1 | -12.677387000 | -40.308265000 | 21.556111000 |
| 1 | -12.708550000 | -38.838566000 | 29.699213000 |
| 1 | -9.089143000  | -37.587651000 | 27.459066000 |
| 1 | -11.952071000 | -35.121485000 | 30.375783000 |
| 1 | -13.185704000 | -37.737158000 | 33.811882000 |
| 1 | -17.784638000 | -34.429682000 | 38.404315000 |
| 1 | -13.238126000 | -29.544967000 | 29.439605000 |
| 1 | -17.752961000 | -24.002721000 | 31.693641000 |
| 1 | -12.874796000 | -25.906614000 | 32.065645000 |
| 8 | -23.968066000 | -40.567345000 | 33.722672000 |
| 1 | -24.456825000 | -39.736477000 | 33.531795000 |
| 1 | -23.397821000 | -40.667587000 | 32.945001000 |
| 1 | -17.072580000 | -45.222973000 | 31.510850000 |

Central iron atom parameter generated by MCPB.py

**Fe atom of Cpdl**

d@<TRIPOS>MOLECULE

FE1

1 0 1 0 0

SMALL

RESP Charge

@<TRIPOS>ATOM

1 FE 4.9160 24.9970 23.9080 M1 1 FE1 0.042478

@<TRIPOS>BOND

@<TRIPOS>SUBSTRUCTURE

1 FE1 1 TEMP 0 \*\*\*\* \*\* 0 ROOT

**Por complex of Cpdl**

@<TRIPOS>MOLECULE

HM1

72 76 1 0 0

SMALL

RESP Charge

@<TRIPOS>ATOM

|   |     |        |         |         |    |   |     |           |
|---|-----|--------|---------|---------|----|---|-----|-----------|
| 1 | CHA | 5.2990 | 25.5880 | 20.4970 | ce | 1 | HM1 | -0.149972 |
| 2 | CHB | 8.1810 | 24.4350 | 24.1630 | ce | 1 | HM1 | -0.171065 |
| 3 | CHC | 4.5320 | 24.0690 | 27.1820 | ce | 1 | HM1 | -0.214791 |
| 4 | CHD | 1.7430 | 24.8320 | 23.4530 | ce | 1 | HM1 | -0.088846 |
| 5 | C1A | 6.4790 | 25.3360 | 21.2110 | cc | 1 | HM1 | -0.006007 |

|        |         |         |            |       |           |
|--------|---------|---------|------------|-------|-----------|
| 6 C2A  | 7.8190  | 25.3410 | 20.6940 cc | 1 HM1 | -0.063546 |
| 7 C3A  | 8.6560  | 25.0820 | 21.7840 cd | 1 HM1 | 0.024111  |
| 8 C4A  | 7.7860  | 24.9180 | 22.9170 cd | 1 HM1 | -0.031981 |
| 9 CMA  | 10.2610 | 24.9950 | 21.7700 c3 | 1 HM1 | -0.298638 |
| 10 CAA | 8.2700  | 25.5850 | 19.2740 c3 | 1 HM1 | -0.055406 |
| 11 CBA | 8.5860  | 27.0180 | 18.8670 c3 | 1 HM1 | -0.102302 |
| 12 CGA | 9.1290  | 27.0440 | 17.4180 c  | 1 HM1 | 0.700663  |
| 13 O1A | 9.9800  | 27.8390 | 17.0880 o  | 1 HM1 | -0.563996 |
| 14 O2A | 8.7710  | 26.2450 | 16.5850 o  | 1 HM1 | -0.525312 |
| 15 C1B | 7.5010  | 24.1910 | 25.3530 cc | 1 HM1 | -0.004532 |
| 16 C2B | 8.1050  | 23.8060 | 26.5880 cc | 1 HM1 | 0.065865  |
| 17 C3B | 7.0200  | 23.6170 | 27.4710 cd | 1 HM1 | -0.021290 |
| 18 C4B | 5.8360  | 23.9190 | 26.6850 cd | 1 HM1 | -0.005691 |
| 19 CMB | 9.6190  | 23.6600 | 26.8390 c3 | 1 HM1 | -0.218500 |
| 20 CAB | 7.0260  | 23.2290 | 28.8230 cf | 1 HM1 | -0.075056 |
| 21 CBB | 8.0620  | 23.1600 | 29.7660 c2 | 1 HM1 | -0.469514 |
| 22 C1C | 3.3770  | 24.3330 | 26.4810 cc | 1 HM1 | 0.057021  |
| 23 C2C | 2.1030  | 24.2600 | 26.9930 cc | 1 HM1 | 0.060742  |
| 24 C3C | 1.2340  | 24.3100 | 25.8660 cd | 1 HM1 | -0.025203 |
| 25 C4C | 2.1010  | 24.4050 | 24.7500 cd | 1 HM1 | -0.031937 |
| 26 CMC | 1.7630  | 24.1530 | 28.5150 c3 | 1 HM1 | -0.170304 |
| 27 CAC | -0.1430 | 24.2840 | 25.7030 cf | 1 HM1 | -0.074837 |
| 28 CBC | -1.1220 | 24.4650 | 26.6570 c2 | 1 HM1 | -0.446459 |
| 29 C1D | 2.4180  | 24.9280 | 22.2820 cc | 1 HM1 | -0.011905 |
| 30 C2D | 1.8100  | 25.1480 | 21.0120 cc | 1 HM1 | 0.106347  |
| 31 C3D | 2.8200  | 25.4120 | 20.1390 cd | 1 HM1 | -0.085844 |
| 32 C4D | 3.9980  | 25.3270 | 20.9310 cd | 1 HM1 | 0.005751  |
| 33 CMD | 0.2980  | 25.0880 | 20.6880 c3 | 1 HM1 | -0.323133 |
| 34 CAD | 2.7920  | 25.7390 | 18.6180 c3 | 1 HM1 | -0.066217 |

|         |         |         |            |       |           |
|---------|---------|---------|------------|-------|-----------|
| 35 CBD  | 2.7120  | 27.3010 | 18.3350 c3 | 1 HM1 | -0.032525 |
| 36 CGD  | 2.7590  | 27.7460 | 16.8150 c  | 1 HM1 | 0.551914  |
| 37 O1D  | 2.3810  | 28.9210 | 16.4360 o  | 1 HM1 | -0.540575 |
| 38 O2D  | 3.2250  | 26.8720 | 15.9620 o  | 1 HM1 | -0.505851 |
| 39 NA   | 6.5090  | 25.0700 | 22.5760 Y3 | 1 HM1 | 0.074371  |
| 40 NB   | 6.1560  | 24.2480 | 25.4440 Y4 | 1 HM1 | 0.012513  |
| 41 NC   | 3.3630  | 24.4140 | 25.1650 Y5 | 1 HM1 | 0.061010  |
| 42 ND   | 3.6970  | 25.0430 | 22.1850 Y6 | 1 HM1 | 0.066520  |
| 43 HHA  | 5.4070  | 26.0270 | 19.5160 ha | 1 HM1 | 0.214672  |
| 44 HHB  | 9.2340  | 24.2010 | 24.2170 ha | 1 HM1 | 0.159095  |
| 45 HHC  | 4.4200  | 23.9640 | 28.2510 ha | 1 HM1 | 0.153782  |
| 46 HHD  | 0.7130  | 25.1490 | 23.3780 ha | 1 HM1 | 0.095662  |
| 47 HAA2 | 9.1720  | 24.9950 | 19.1130 hc | 1 HM1 | 0.035218  |
| 48 HAA3 | 7.4970  | 25.2070 | 18.6050 hc | 1 HM1 | 0.035218  |
| 49 HBA2 | 9.3370  | 27.4290 | 19.5420 hc | 1 HM1 | 0.025979  |
| 50 HBA3 | 7.6790  | 27.6200 | 18.9250 hc | 1 HM1 | 0.025979  |
| 51 HAB  | 6.0600  | 22.9310 | 29.2030 ha | 1 HM1 | 0.106817  |
| 52 HAC  | -0.4940 | 24.0980 | 24.6990 ha | 1 HM1 | 0.100737  |
| 53 HAD2 | 3.6990  | 25.3460 | 18.1590 hc | 1 HM1 | 0.032992  |
| 54 HAD3 | 1.9270  | 25.2520 | 18.1670 hc | 1 HM1 | 0.032992  |
| 55 HBD2 | 3.5520  | 27.7730 | 18.8450 hc | 1 HM1 | 0.022084  |
| 56 HBD3 | 1.7890  | 27.6810 | 18.7740 hc | 1 HM1 | 0.022084  |
| 57 HBC1 | -0.8470 | 24.6560 | 27.6840 ha | 1 HM1 | 0.147977  |
| 58 HBC2 | -2.1640 | 24.4160 | 26.3770 ha | 1 HM1 | 0.147977  |
| 59 HMA1 | 10.6230 | 24.7820 | 22.7760 hc | 1 HM1 | 0.087046  |
| 60 HMA2 | 10.5760 | 24.1990 | 21.0950 hc | 1 HM1 | 0.087046  |
| 61 HMA3 | 10.6730 | 25.9450 | 21.4290 hc | 1 HM1 | 0.087046  |
| 62 HMB1 | 10.1590 | 23.8130 | 25.9050 hc | 1 HM1 | 0.061747  |
| 63 HMB2 | 9.9390  | 24.4030 | 27.5690 hc | 1 HM1 | 0.061747  |



|         |         |         |         |    |       |          |
|---------|---------|---------|---------|----|-------|----------|
| 64 HMB3 | 9.8290  | 22.6610 | 27.2210 | hc | 1 HM1 | 0.061747 |
| 65 HMC1 | 2.6740  | 23.9490 | 29.0780 | hc | 1 HM1 | 0.045527 |
| 66 HMC2 | 1.3280  | 25.0920 | 28.8570 | hc | 1 HM1 | 0.045527 |
| 67 HMC3 | 1.0500  | 23.3440 | 28.6720 | hc | 1 HM1 | 0.045527 |
| 68 HMD1 | 0.1500  | 25.2150 | 19.6160 | hc | 1 HM1 | 0.085077 |
| 69 HMD2 | -0.2200 | 25.8840 | 21.2230 | hc | 1 HM1 | 0.085077 |
| 70 HMD3 | -0.1020 | 24.1230 | 20.9980 | hc | 1 HM1 | 0.085077 |
| 71 HBB1 | 9.0670  | 23.4370 | 29.4840 | ha | 1 HM1 | 0.155797 |
| 72 HBB2 | 7.8550  | 22.8290 | 30.7730 | ha | 1 HM1 | 0.155797 |

@<TRIPOS>BOND

1 1 5 1  
2 1 32 1  
3 1 43 1  
4 2 8 1  
5 2 15 1  
6 2 44 1  
7 3 18 1  
8 3 22 1  
9 3 45 1  
10 4 25 1  
11 4 29 1  
12 4 46 1  
13 5 6 1  
14 5 39 1  
15 6 7 1  
16 6 10 1  
17 7 8 1  
18 7 9 1  
19 8 39 1

20 9 59 1  
21 9 60 1  
22 9 61 1  
23 10 11 1  
24 10 47 1  
25 10 48 1  
26 11 12 1  
27 11 49 1  
28 11 50 1  
29 12 13 1  
30 12 14 1  
31 15 16 1  
32 15 40 1  
33 16 17 1  
34 16 19 1  
35 17 18 1  
36 17 20 1  
37 18 40 1  
38 19 62 1  
39 19 63 1  
40 19 64 1  
41 20 21 1  
42 20 51 1  
43 21 71 1  
44 21 72 1  
45 22 23 1  
46 22 41 1  
47 23 24 1  
48 23 26 1

49 24 25 1  
50 24 27 1  
51 25 41 1  
52 26 65 1  
53 26 66 1  
54 26 67 1  
55 27 28 1  
56 27 52 1  
57 28 57 1  
58 28 58 1  
59 29 30 1  
60 29 42 1  
61 30 31 1  
62 30 33 1  
63 31 32 1  
64 31 34 1  
65 32 42 1  
66 33 68 1  
67 33 69 1  
68 33 70 1  
69 34 35 1  
70 34 53 1  
71 34 54 1  
72 35 36 1  
73 35 55 1  
74 35 56 1  
75 36 37 1  
76 36 38 1

@<TRIPOS>SUBSTRUCTURE

1 HM1 1 TEMP 0 \*\*\*\* \*\* 0 ROOT

**Oxygen atom of CpdI**

@<TRIPOS>MOLECULE

OO1

1 0 1 0 0

SMALL

RESP Charge

@<TRIPOS>ATOM

1 O1 4.7240 23.5100 23.4100 Y2 1 OO1 -0.412137

@<TRIPOS>BOND

@<TRIPOS>SUBSTRUCTURE

1 OO1 1 TEMP 0 \*\*\*\* \*\* 0 ROOT

**Cysteine ligand of CpdI**

@<TRIPOS>MOLECULE

CS1

10 9 1 0 0

SMALL

RESP Charge

@<TRIPOS>ATOM

|      |        |         |         |    |       |           |
|------|--------|---------|---------|----|-------|-----------|
| 1 N  | 6.3070 | 29.4380 | 21.9000 | N  | 1 CS1 | -0.415700 |
| 2 CA | 5.3050 | 28.7430 | 22.6880 | CX | 1 CS1 | 0.021300  |
| 3 C  | 4.1120 | 29.5970 | 23.2160 | C  | 1 CS1 | 0.597300  |
| 4 O  | 4.2890 | 30.6070 | 23.8710 | O  | 1 CS1 | -0.567900 |
| 5 CB | 5.9850 | 28.0610 | 23.8670 | 2C | 1 CS1 | -0.009069 |
| 6 SG | 4.7990 | 27.1450 | 24.8480 | Y1 | 1 CS1 | -0.515874 |

|        |        |         |         |    |       |           |
|--------|--------|---------|---------|----|-------|-----------|
| 7 H    | 7.2770 | 29.1830 | 22.0200 | H  | 1 CS1 | 0.233040  |
| 8 HA   | 4.8860 | 27.9580 | 22.0580 | H1 | 1 CS1 | -0.012348 |
| 9 HB2  | 6.7440 | 27.3740 | 23.4920 | H1 | 1 CS1 | 0.062133  |
| 10 HB3 | 6.4610 | 28.8160 | 24.4920 | H1 | 1 CS1 | 0.062133  |

@<TRIPOS>BOND

|   |   |    |   |
|---|---|----|---|
| 1 | 1 | 2  | 1 |
| 2 | 1 | 7  | 1 |
| 3 | 2 | 3  | 1 |
| 4 | 2 | 5  | 1 |
| 5 | 2 | 8  | 1 |
| 6 | 3 | 4  | 1 |
| 7 | 5 | 6  | 1 |
| 8 | 5 | 9  | 1 |
| 9 | 5 | 10 | 1 |

@<TRIPOS>SUBSTRUCTURE

|       |        |        |      |        |
|-------|--------|--------|------|--------|
| 1 CS1 | 1 TEMP | 0 **** | **** | 0 ROOT |
|-------|--------|--------|------|--------|

## Hydrogen bonds list of model I, II, III and IV of CYP1A1 with melatonin

### Model I

RES\_DONOR,ATOM\_DONOR,RES\_ACCEPTOR,ATOM\_ACCEPTOR,  
TAG

1,37,O,39,H,37-O-39-H

2,37,O,39,HD22,37-O-39-HD22

3,38,O,400,H,38-O-400-H

4,39,O,38,HZ2,39-O-38-HZ2

5,39,OD1,39,H,39-OD1-39-H

6,39,ND2,39,H,39-ND2-39-H

7,39,ND2,75,HE22,39-ND2-75-HE22

8,39,OD1,405,HH21,39-OD1-405-HH21

9,39,O,39,HD22,39-O-39-HD22

10,39,OD1,75,HE22,39-OD1-75-HE22

11,40,O,75,HE21,40-O-75-HE21

12,40,O,39,HD22,40-O-39-HD22

13,41,O,75,H,41-O-75-H

14,43,O,51,HE2,43-O-51-HE2

15,44,O,51,HE2,44-O-51-HE2

16,45,O,77,HE,45-O-77-HE

17,45,O,77,HH22,45-O-77-HH22

18,45,O,77,HH21,45-O-77-HH21

19,45,O,77,HH11,45-O-77-HH11

20,45,O,77,HH12,45-O-77-HH12

21,46,O,49,H,46-O-49-H

22,46,O,50,H,46-O-50-H

23,46,O,77,HH21,46-O-77-HH21

24,46,O,48,H,46-O-48-H

25,46,O,77,HH12,46-O-77-HH12

26,47,O,77,HE,47-O-77-HE

27,47,O,77,HH22,47-O-77-HH22

28,47,O,77,HH11,47-O-77-HH11

29,47,O,80,HG,47-O-80-HG

30,47,O,77,HH21,47-O-77-HH21

31,49,O,79,H,49-O-79-H

32,50,O,52,H,50-O-52-H

33,50,O,53,H,50-O-53-H

34,50,O,46,H,50-O-46-H

35,51,O,55,H,51-O-55-H

36,51,ND1,51,H,51-ND1-51-H

37,51,O,54,H,51-O-54-H

38,51,ND1,77,H,51-ND1-77-H

39,51,O,54,HG1,51-O-54-HG1

40,52,O,54,H,52-O-54-H

41,52,O,55,H,52-O-55-H

42,52,O,56,H,52-O-56-H

43,53,O,56,H,53-O-56-H

44,54,O,65,HH22,54-O-65-HH22

45,55,O,58,HD22,55-O-58-HD22

46,55,O,58,H,55-O-58-H

47,57,O,58,HD22,57-O-58-HD22

48,57,O,57,HZ1,57-O-57-HZ1

49,57,O,57,HZ2,57-O-57-HZ2

50,58,OD1,494,H,58-OD1-494-H

51,58,O,58,HD22,58-O-58-HD22

52,58,O,61,H,58-O-61-H

53,58,O,62,H,58-O-62-H

54,59,O,63,H,59-O-63-H

55,59,O,62,H,59-O-62-H

56,60,O,64,H,60-O-64-H

57,60,O,64,HG,60-O-64-HG

58,60,ND1,61,H,60-ND1-61-H

59,60,O,410,HD21,60-O-410-HD21

60,60,ND1,60,H,60-ND1-60-H

61,61,O,64,H,61-O-64-H

62,61,O,65,H,61-O-65-H

63,62,O,66,H,62-O-66-H

64,62,O,65,H,62-O-65-H

65,63,O,67,H,63-O-67-H

66,63,O,67,HG,63-O-67-HG

67,63,O,66,H,63-O-66-H

68,63,O,410,HD22,63-O-410-HD22

69,64,O,68,HE22,64-O-68-HE22

70,64,O,67,H,64-O-67-H

71,64,OG,410,HD21,64-OG-410-HD21

72,64,O,68,H,64-O-68-H

73,64,O,67,HG,64-O-67-HG

74,64,O,68,HE21,64-O-68-HE21

75,64,O,413,HE22,64-O-413-HE22

|                                    |                                     |
|------------------------------------|-------------------------------------|
| 76,65,O,65,HH11,65-O-65-HH11       | 116,72,OD1,397,HZ2,72-OD1-397-HZ2   |
| 77,65,O,68,H,65-O-68-H             | 117,72,OD2,397,HZ2,72-OD2-397-HZ2   |
| 78,65,O,69,HE22,65-O-69-HE22       | 118,72,OD2,72,H,72-OD2-72-H         |
| 79,65,O,69,HE21,65-O-69-HE21       | 119,72,OD1,397,HZ1,72-OD1-397-HZ1   |
| 80,65,O,69,H,65-O-69-H             | 120,72,OD2,397,HZ3,72-OD2-397-HZ3   |
| 81,66,O,69,H,66-O-69-H             | 121,72,O,87,H,72-O-87-H             |
| 82,66,O,70,H,66-O-70-H             | 122,74,O,85,H,74-O-85-H             |
| 83,67,OG,413,HE22,67-OG-413-HE22   | 123,75,OE1,39,HD22,75-OE1-39-HD22   |
| 84,67,OG,410,HD22,67-OG-410-HD22   | 124,75,NE2,39,HD21,75-NE2-39-HD21   |
| 85,67,O,70,H,67-O-70-H             | 125,75,OE1,77,HH21,75-OE1-77-HH21   |
| 86,67,O,69,H,67-O-69-H             | 126,75,OE1,405,HH21,75-OE1-405-HH21 |
| 87,67,O,71,H,67-O-71-H             | 127,75,OE1,39,HD21,75-OE1-39-HD21   |
| 88,67,OG,68,HE21,67-OG-68-HE21     | 128,75,OE1,405,HE,75-OE1-405-HE     |
| 89,67,OG,413,HE21,67-OG-413-HE21   | 129,75,NE2,39,HD22,75-NE2-39-HD22   |
| 90,67,OG,87,HG,67-OG-87-HG         | 130,75,OE1,77,HE,75-OE1-77-HE       |
| 91,68,NE2,418,HE22,68-NE2-418-HE22 | 131,76,O,75,HE21,76-O-75-HE21       |
| 92,68,OE1,418,HE22,68-OE1-418-HE22 | 132,76,O,83,H,76-O-83-H             |
| 93,68,OE1,419,HZ1,68-OE1-419-HZ1   | 133,77,O,51,H,77-O-51-H             |
| 94,68,OE1,65,HH11,68-OE1-65-HH11   | 134,78,O,81,H,78-O-81-H             |
| 95,68,OE1,419,HZ3,68-OE1-419-HZ3   | 135,78,O,80,H,78-O-80-H             |
| 96,68,OE1,419,HZ2,68-OE1-419-HZ2   | 136,79,O,77,HH11,79-O-77-HH11       |
| 97,68,NE2,413,HE22,68-NE2-413-HE22 | 137,79,O,81,H,79-O-81-H             |
| 98,68,OE1,68,H,68-OE1-68-H         | 138,79,O,48,H,79-O-48-H             |
| 99,68,OE1,413,HE22,68-OE1-413-HE22 | 139,79,O,77,HE,79-O-77-HE           |
| 100,68,OE1,65,HE,68-OE1-65-HE      | 140,80,O,80,HG,80-O-80-HG           |
| 101,68,O,68,HE21,68-O-68-HE21      | 141,80,O,77,HH11,80-O-77-HH11       |
| 102,69,OE1,65,HH22,69-OE1-65-HH22  | 142,80,O,77,HE,80-O-77-HE           |
| 103,69,OE1,68,HE21,69-OE1-68-HE21  | 143,80,O,77,HH21,80-O-77-HH21       |
| 104,69,OE1,70,HH,69-OE1-70-HH      | 144,80,O,81,HG1,80-O-81-HG1         |
| 105,69,O,69,HE21,69-O-69-HE21      | 145,80,OG,77,HH21,80-OG-77-HH21     |
| 106,69,OE1,65,HH12,69-OE1-65-HH12  | 146,80,OG,81,HG1,80-OG-81-HG1       |
| 107,70,OH,69,HE21,70-OH-69-HE21    | 147,81,O,81,HG1,81-O-81-HG1         |
| 108,71,O,67,HG,71-O-67-HG          | 148,81,O,78,H,81-O-78-H             |
| 109,71,O,87,HG,71-O-87-HG          | 149,82,O,405,HH21,82-O-405-HH21     |
| 110,72,OD2,91,HG1,72-OD2-91-HG1    | 150,82,O,405,HH11,82-O-405-HH11     |
| 111,72,OD2,397,HZ1,72-OD2-397-HZ1  | 151,83,O,76,H,83-O-76-H             |
| 112,72,OD1,72,H,72-OD1-72-H        | 152,83,O,75,HE21,83-O-75-HE21       |
| 113,72,O,88,H,72-O-88-H            | 153,84,O,408,H,84-O-408-H           |
| 114,72,OD1,91,HG1,72-OD1-91-HG1    | 154,85,O,87,HG,85-O-87-HG           |
| 115,72,OD1,397,HZ3,72-OD1-397-HZ3  | 155,85,O,74,H,85-O-74-H             |

|                                   |                                       |
|-----------------------------------|---------------------------------------|
| 156,86,O,410,H,86-O-410-H         | 196,91,OG1,397,HZ1,91-OG1-397-HZ1     |
| 157,86,O,87,HG,86-O-87-HG         | 197,91,O,95,H,91-O-95-H               |
| 158,87,O,87,HG,87-O-87-HG         | 198,91,OG1,397,HZ3,91-OG1-397-HZ3     |
| 159,87,O,413,HE21,87-O-413-HE21   | 199,91,OG1,397,HZ2,91-OG1-397-HZ2     |
| 160,87,O,91,HG1,87-O-91-HG1       | 200,92,O,96,H,92-O-96-H               |
| 161,87,O,413,HE22,87-O-413-HE22   | 201,92,O,95,H,92-O-95-H               |
| 162,87,OG,410,HD22,87-OG-410-HD22 | 202,93,O,98,H,93-O-98-H               |
| 163,87,OG,67,HG,87-OG-67-HG       | 203,93,O,97,H,93-O-97-H               |
| 164,88,O,92,H,88-O-92-H           | 204,94,OE1,397,H,94-OE1-397-H         |
| 165,88,O,91,H,88-O-91-H           | 205,94,O,98,H,94-O-98-H               |
| 166,89,O,93,H,89-O-93-H           | 206,94,OE1,397,HZ2,94-OE1-397-HZ2     |
| 167,89,O,92,H,89-O-92-H           | 207,94,OE1,397,HZ3,94-OE1-397-HZ3     |
| 168,90,O,98,HH12,90-O-98-HH12     | 208,94,O,99,H,94-O-99-H               |
| 169,90,OD2,93,HH12,90-OD2-93-HH12 | 209,94,OE1,397,HZ1,94-OE1-397-HZ1     |
| 170,90,OD2,93,HH22,90-OD2-93-HH22 | 210,94,O,99,HE21,94-O-99-HE21         |
| 171,90,OD2,419,HZ2,90-OD2-419-HZ2 | 211,94,OE1,98,HE,94-OE1-98-HE         |
| 172,90,OD1,93,HH21,90-OD1-93-HH21 | 212,94,OE1,98,HH21,94-OE1-98-HH21     |
| 173,90,OD2,98,HH12,90-OD2-98-HH12 | 213,94,OE1,98,HH11,94-OE1-98-HH11     |
| 174,90,OD2,93,HE,90-OD2-93-HE     | 214,95,O,100,H,95-O-100-H             |
| 175,90,OD2,91,H,90-OD2-91-H       | 215,95,O,99,H,95-O-99-H               |
| 176,90,OD1,397,HZ3,90-OD1-397-HZ3 | 216,96,O,454,H,96-O-454-H             |
| 177,90,OD1,397,HZ1,90-OD1-397-HZ1 | 217,97,O,100,H,97-O-100-H             |
| 178,90,O,98,HH22,90-O-98-HH22     | 218,97,O,454,HZ3,97-O-454-HZ3         |
| 179,90,O,94,H,90-O-94-H           | 219,97,O,454,HZ2,97-O-454-HZ2         |
| 180,90,OD1,98,HH22,90-OD1-98-HH22 | 220,98,O,99,HE21,98-O-99-HE21         |
| 181,90,OD2,397,HZ3,90-OD2-397-HZ3 | 221,98,O,98,HH11,98-O-98-HH11         |
| 182,90,OD1,93,HH11,90-OD1-93-HH11 | 222,99,O,103,H,99-O-103-H             |
| 183,90,OD2,93,HH21,90-OD2-93-HH21 | 223,99,O,102,H,99-O-102-H             |
| 184,90,OD1,93,HE,90-OD1-93-HE     | 224,99,O,101,H,99-O-101-H             |
| 185,90,OD2,90,H,90-OD2-90-H       | 225,99,OE1,94,HE21,99-OE1-94-HE21     |
| 186,90,OD1,91,H,90-OD1-91-H       | 226,99,OE1,394,HG1,99-OE1-394-HG1     |
| 187,90,OD1,90,H,90-OD1-90-H       | 227,100,O,104,H,100-O-104-H           |
| 188,90,OD2,397,HZ1,90-OD2-397-HZ1 | 228,100,O,103,H,100-O-103-H           |
| 189,90,OD2,91,HG1,90-OD2-91-HG1   | 229,101,OD2,392,HH12,101-OD2-392-HH12 |
| 190,90,OD2,93,HH11,90-OD2-93-HH11 | 230,101,OD1,392,HH12,101-OD1-392-HH12 |
| 191,90,OD2,397,HZ2,90-OD2-397-HZ2 | 231,101,O,104,HZ1,101-O-104-HZ1       |
| 192,90,OD1,91,HG1,90-OD1-91-HG1   | 232,101,O,104,HZ2,101-O-104-HZ2       |
| 193,90,OD2,98,HH22,90-OD2-98-HH22 | 233,101,OD1,392,HH22,101-OD1-392-HH22 |
| 194,90,OD1,397,HZ2,90-OD1-397-HZ2 | 234,101,OD2,454,HZ1,101-OD2-454-HZ1   |
| 195,90,OD1,98,HH12,90-OD1-98-HH12 | 235,101,O,104,HZ3,101-O-104-HZ3       |



|                                       |                                       |
|---------------------------------------|---------------------------------------|
| 236,101,OD2,392,HH22,101-OD2-392-HH22 | 276,108,OD1,108,H,108-OD1-108-H       |
| 237,101,OD2,104,HZ1,101-OD2-104-HZ1   | 277,108,O,241,HH12,108-O-241-HH12     |
| 238,101,OD2,454,HZ3,101-OD2-454-HZ3   | 278,109,O,113,HG1,109-O-113-HG1       |
| 239,101,OD1,454,HZ3,101-OD1-454-HZ3   | 279,109,O,112,H,109-O-112-H           |
| 240,101,OD2,104,HZ3,101-OD2-104-HZ3   | 280,109,O,113,H,109-O-113-H           |
| 241,101,OD2,104,HZ2,101-OD2-104-HZ2   | 281,110,O,113,H,110-O-113-H           |
| 242,101,OD1,454,HZ2,101-OD1-454-HZ2   | 282,110,OH,252,HZ2,110-OH-252-HZ2     |
| 243,101,OD2,454,HZ2,101-OD2-454-HZ2   | 283,110,O,114,H,110-O-114-H           |
| 244,101,OD1,104,HZ3,101-OD1-104-HZ3   | 284,110,OH,241,HH21,110-OH-241-HH21   |
| 245,101,OD1,104,HZ1,101-OD1-104-HZ1   | 285,110,OH,252,HZ1,110-OH-252-HZ1     |
| 246,101,OD1,104,HZ2,101-OD1-104-HZ2   | 286,110,OH,242,HH,110-OH-242-HH       |
| 247,101,OD1,454,HZ1,101-OD1-454-HZ1   | 287,110,O,113,HG1,110-O-113-HG1       |
| 248,101,O,392,HH12,101-O-392-HH12     | 288,110,OH,252,HZ3,110-OH-252-HZ3     |
| 249,101,O,391,HG1,101-O-391-HG1       | 289,111,O,114,H,111-O-114-H           |
| 250,102,OD2,392,HE,102-OD2-392-HE     | 290,111,OG1,112,H,111-OG1-112-H       |
| 251,102,OD1,392,HH21,102-OD1-392-HH21 | 291,111,O,115,H,111-O-115-H           |
| 252,102,OD2,394,HG1,102-OD2-394-HG1   | 292,112,O,115,H,112-O-115-H           |
| 253,102,OD1,392,HH11,102-OD1-392-HH11 | 293,113,O,118,H,113-O-118-H           |
| 254,102,OD1,392,HE,102-OD1-392-HE     | 294,113,O,113,HG1,113-O-113-HG1       |
| 255,102,OD2,99,HE21,102-OD2-99-HE21   | 295,114,O,117,H,114-O-117-H           |
| 256,102,OD2,392,HH21,102-OD2-392-HH21 | 296,114,O,118,H,114-O-118-H           |
| 257,102,O,104,H,102-O-104-H           | 297,115,O,120,H,115-O-120-H           |
| 258,102,O,391,HG1,102-O-391-HG1       | 298,115,O,118,H,115-O-118-H           |
| 259,102,OD1,394,HG1,102-OD1-394-HG1   | 299,116,O,309,HD22,116-O-309-HD22     |
| 260,102,O,391,H,102-O-391-H           | 300,116,O,119,HE21,116-O-119-HE21     |
| 261,102,OD1,99,HE21,102-OD1-99-HE21   | 301,116,O,309,HD21,116-O-309-HD21     |
| 262,103,O,388,HD1,103-O-388-HD1       | 302,116,O,117,HD22,116-O-117-HD22     |
| 263,103,O,105,H,103-O-105-H           | 303,116,O,119,H,116-O-119-H           |
| 264,104,O,455,HE,104-O-455-HE         | 304,117,OD1,119,HE21,117-OD1-119-HE21 |
| 265,104,O,455,HH21,104-O-455-HH21     | 305,117,ND2,259,HH,117-ND2-259-HH     |
| 266,104,O,127,HG,104-O-127-HG         | 306,117,O,119,HE21,117-O-119-HE21     |
| 267,105,O,389,H,105-O-389-H           | 307,117,OD1,309,HD21,117-OD1-309-HD21 |
| 268,107,O,109,H,107-O-109-H           | 308,117,OD1,119,HE22,117-OD1-119-HE22 |
| 269,108,OD2,108,H,108-OD2-108-H       | 309,117,OD1,309,HD22,117-OD1-309-HD22 |
| 270,108,OD1,241,HH22,108-OD1-241-HH22 | 310,117,O,117,HD22,117-O-117-HD22     |
| 271,108,OD1,241,HH12,108-OD1-241-HH12 | 311,118,O,124,HG,118-O-124-HG         |
| 272,108,OD2,241,HH22,108-OD2-241-HH22 | 312,118,O,119,HE21,118-O-119-HE21     |
| 273,108,OD2,241,HH12,108-OD2-241-HH12 | 313,119,OE1,134,HH22,119-OE1-134-HH22 |
| 274,108,OD2,109,H,108-OD2-109-H       | 314,119,OE1,309,HD22,119-OE1-309-HD22 |
| 275,108,O,241,HH22,108-O-241-HH22     | 315,119,OE1,306,HZ2,119-OE1-306-HZ2   |

316,119,OE1,309,HD21,119-OE1-309-HD21  
317,119,OE1,117,HD22,119-OE1-117-HD22  
318,119,NE2,309,HD22,119-NE2-309-HD22  
319,119,OE1,306,HZ1,119-OE1-306-HZ1  
320,119,OE1,306,HZ3,119-OE1-306-HZ3  
321,119,O,309,HD21,119-O-309-HD21  
322,119,O,134,HH21,119-O-134-HH21  
323,119,O,134,HH12,119-O-134-HH12  
324,119,O,134,HH22,119-O-134-HH22  
325,120,O,134,HH12,120-O-134-HH12  
326,120,OG,122,H,120-OG-122-H  
327,120,O,134,HH22,120-O-134-HH22  
328,120,O,124,HG,120-O-124-HG  
329,120,OG,123,H,120-OG-123-H  
330,120,OG,122,HG,120-OG-122-HG  
331,120,O,123,H,120-O-123-H  
332,120,O,124,H,120-O-124-H  
333,121,O,455,HH22,121-O-455-HH22  
334,121,O,455,HH12,121-O-455-HH12  
335,121,O,124,H,121-O-124-H  
336,121,O,131,HE1,121-O-131-HE1  
337,122,O,106,HH21,122-O-106-HH21  
338,122,OG,516,H10,122-OG-516-H10  
339,122,O,455,HH12,122-O-455-HH12  
340,122,O,106,HE,122-O-106-HE  
341,124,OG,306,HZ3,124-OG-306-HZ3  
342,124,O,455,HH12,124-O-455-HH12  
343,124,O,455,HH22,124-O-455-HH22  
344,124,OG,126,H,124-OG-126-H  
345,124,OG,134,HH12,124-OG-134-HH12  
346,124,O,126,H,124-O-126-H  
347,124,OG,455,HH22,124-OG-455-HH22  
348,124,OG,455,HH12,124-OG-455-HH12  
349,125,O,127,H,125-O-127-H  
350,125,O,127,HG,125-O-127-HG  
351,125,O,106,H,125-O-106-H  
352,126,OD2,134,HH12,126-OD2-134-HH12  
353,126,OD1,126,H,126-OD1-126-H  
354,126,OD2,134,HH22,126-OD2-134-HH22  
355,126,OD2,126,H,126-OD2-126-H  
356,126,OD1,127,H,126-OD1-127-H  
357,126,OD1,131,H,126-OD1-131-H  
358,126,OD2,306,HZ3,126-OD2-306-HZ3  
359,126,OD1,124,HG,126-OD1-124-HG  
360,126,OD1,134,HH12,126-OD1-134-HH12  
361,126,O,455,HH21,126-O-455-HH21  
362,126,O,124,HG,126-O-124-HG  
363,126,OD1,128,H,126-OD1-128-H  
364,126,OD2,128,H,126-OD2-128-H  
365,126,OD2,124,HG,126-OD2-124-HG  
366,126,OD1,134,HH22,126-OD1-134-HH22  
367,126,OD2,127,H,126-OD2-127-H  
368,126,OD2,306,HZ2,126-OD2-306-HZ2  
369,126,OD2,134,HH11,126-OD2-134-HH11  
370,126,OD1,306,HZ3,126-OD1-306-HZ3  
371,126,O,455,HE,126-O-455-HE  
372,126,OD2,306,HZ1,126-OD2-306-HZ1  
373,126,OD1,306,HZ1,126-OD1-306-HZ1  
374,126,O,455,HH22,126-O-455-HH22  
375,126,O,455,HH12,126-O-455-HH12  
376,126,OD1,306,HZ2,126-OD1-306-HZ2  
377,126,OD2,131,H,126-OD2-131-H  
378,126,O,127,HG,126-O-127-HG  
379,127,OG,104,HZ1,127-OG-104-HZ1  
380,127,OG,455,HE,127-OG-455-HE  
381,127,OG,104,HZ2,127-OG-104-HZ2  
382,127,OG,104,HZ3,127-OG-104-HZ3  
383,127,O,104,HZ3,127-O-104-HZ3  
384,127,O,104,HZ2,127-O-104-HZ2  
385,127,O,104,HZ1,127-O-104-HZ1  
386,127,OG,455,HH21,127-OG-455-HH21  
387,128,O,131,H,128-O-131-H  
388,128,O,132,H,128-O-132-H  
389,129,O,297,HD22,129-O-297-HD22  
390,129,O,133,H,129-O-133-H  
391,129,O,297,HD21,129-O-297-HD21  
392,129,O,299,HD22,129-O-299-HD22  
393,130,O,134,H,130-O-134-H  
394,130,O,133,H,130-O-133-H  
395,131,O,134,H,131-O-134-H

|                                       |                                   |
|---------------------------------------|-----------------------------------|
| 396,131,O,135,H,131-O-135-H           | 436,141,O,144,HG,141-O-144-HG     |
| 397,132,O,135,H,132-O-135-H           | 437,141,O,145,H,141-O-145-H       |
| 398,132,O,136,H,132-O-136-H           | 438,141,O,144,H,141-O-144-H       |
| 399,133,O,136,HE,133-O-136-HE         | 439,142,O,146,HG,142-O-146-HG     |
| 400,133,O,136,HH21,133-O-136-HH21     | 440,142,O,146,H,142-O-146-H       |
| 401,133,O,136,H,133-O-136-H           | 441,142,O,147,H,142-O-147-H       |
| 402,133,O,136,HH11,133-O-136-HH11     | 442,142,O,145,H,142-O-145-H       |
| 403,133,O,137,H,133-O-137-H           | 443,143,O,148,H,143-O-148-H       |
| 404,134,O,138,H,134-O-138-H           | 444,143,O,146,H,143-O-146-H       |
| 405,135,O,139,H,135-O-139-H           | 445,143,O,147,H,143-O-147-H       |
| 406,135,O,138,H,135-O-138-H           | 446,144,O,144,HG,144-O-144-HG     |
| 407,135,O,139,HE21,135-O-139-HE21     | 447,145,O,162,HE2,145-O-162-HE2   |
| 408,136,O,140,H,136-O-140-H           | 448,145,O,146,HG,145-O-146-HG     |
| 409,136,O,140,HD22,136-O-140-HD22     | 449,146,O,148,H,146-O-148-H       |
| 410,137,O,141,H,137-O-141-H           | 450,146,OG,147,H,146-OG-147-H     |
| 411,138,O,141,H,138-O-141-H           | 451,146,O,159,H,146-O-159-H       |
| 412,138,O,142,H,138-O-142-H           | 452,146,O,158,H,146-O-158-H       |
| 413,139,OE1,143,HZ1,139-OE1-143-HZ1   | 453,148,O,158,H,148-O-158-H       |
| 414,139,OE1,143,HZ3,139-OE1-143-HZ3   | 454,149,OG,150,H,149-OG-150-H     |
| 415,139,O,139,HE21,139-O-139-HE21     | 455,149,OG,156,H,149-OG-156-H     |
| 416,139,OE1,136,HH11,139-OE1-136-HH11 | 456,149,O,158,HH,149-O-158-HH     |
| 417,139,NE2,135,HH21,139-NE2-135-HH21 | 457,150,OD1,158,HH,150-OD1-158-HH |
| 418,139,OE1,135,HE,139-OE1-135-HE     | 458,150,OD2,156,HG,150-OD2-156-HG |
| 419,139,OE1,135,HH21,139-OE1-135-HH21 | 459,150,OD2,153,HG,150-OD2-153-HG |
| 420,139,OE1,143,HZ2,139-OE1-143-HZ2   | 460,150,OD1,153,H,150-OD1-153-H   |
| 421,139,O,143,H,139-O-143-H           | 461,150,OD1,156,HG,150-OD1-156-HG |
| 422,139,OE1,140,HD22,139-OE1-140-HD22 | 462,150,OD1,153,HG,150-OD1-153-HG |
| 423,139,O,143,HZ2,139-O-143-HZ2       | 463,150,OD2,154,H,150-OD2-154-H   |
| 424,139,OE1,136,HH12,139-OE1-136-HH12 | 464,150,O,149,HG,150-O-149-HG     |
| 425,140,OD1,139,HE21,140-OD1-139-HE21 | 465,150,OD2,153,H,150-OD2-153-H   |
| 426,140,OD1,136,HE,140-OD1-136-HE     | 466,150,OD2,152,H,150-OD2-152-H   |
| 427,140,OD1,143,HZ3,140-OD1-143-HZ3   | 467,150,OD2,158,HH,150-OD2-158-HH |
| 428,140,OD1,136,HH21,140-OD1-136-HH21 | 468,150,O,154,HG,150-O-154-HG     |
| 429,140,OD1,288,HE2,140-OD1-288-HE2   | 469,150,OD1,152,H,150-OD1-152-H   |
| 430,140,OD1,136,HH11,140-OD1-136-HH11 | 470,150,O,152,H,150-O-152-H       |
| 431,140,O,144,HG,140-O-144-HG         | 471,150,O,154,H,150-O-154-H       |
| 432,140,O,144,H,140-O-144-H           | 472,150,O,153,H,150-O-153-H       |
| 433,140,OD1,143,HZ2,140-OD1-143-HZ2   | 473,150,OD1,150,H,150-OD1-150-H   |
| 434,140,OD1,143,HZ1,140-OD1-143-HZ1   | 474,150,O,153,HG,150-O-153-HG     |
| 435,140,O,140,HD22,140-O-140-HD22     | 475,151,O,154,HG,151-O-154-HG     |

|                                       |                                       |
|---------------------------------------|---------------------------------------|
| 476,151,O,153,H,151-O-153-H           | 516,157,O,160,H,157-O-160-H           |
| 477,152,O,153,HG,152-O-153-HG         | 517,157,O,156,HG,157-O-156-HG         |
| 478,152,O,154,H,152-O-154-H           | 518,157,O,161,H,157-O-161-H           |
| 479,153,OG,154,H,153-OG-154-H         | 519,158,O,162,H,158-O-162-H           |
| 480,153,OG,155,HG1,153-OG-155-HG1     | 520,158,O,161,H,158-O-161-H           |
| 481,153,OG,155,H,153-OG-155-H         | 521,159,O,162,H,159-O-162-H           |
| 482,153,O,155,H,153-O-155-H           | 522,159,O,163,H,159-O-163-H           |
| 483,153,O,155,HG1,153-O-155-HG1       | 523,160,O,164,H,160-O-164-H           |
| 484,153,O,156,H,153-O-156-H           | 524,160,OE1,358,HH11,160-OE1-358-HH11 |
| 485,153,OG,358,HH12,153-OG-358-HH12   | 525,160,OE2,156,HG,160-OE2-156-HG     |
| 486,153,OG,156,H,153-OG-156-H         | 526,160,O,164,HG,160-O-164-HG         |
| 487,153,O,149,HG,153-O-149-HG         | 527,160,OE1,356,HH12,160-OE1-356-HH12 |
| 488,153,OG,156,HG,153-OG-156-HG       | 528,160,OE2,164,HG,160-OE2-164-HG     |
| 489,153,O,156,HG,153-O-156-HG         | 529,160,OE1,356,HH22,160-OE1-356-HH22 |
| 490,154,OG,155,H,154-OG-155-H         | 530,160,OE1,359,H,160-OE1-359-H       |
| 491,154,OG,155,HG1,154-OG-155-HG1     | 531,160,OE1,157,H,160-OE1-157-H       |
| 492,154,OG,358,HH12,154-OG-358-HH12   | 532,160,OE1,156,HG,160-OE1-156-HG     |
| 493,154,O,155,HG1,154-O-155-HG1       | 533,160,OE2,359,H,160-OE2-359-H       |
| 494,154,O,154,HG,154-O-154-HG         | 534,160,OE2,356,HH21,160-OE2-356-HH21 |
| 495,154,O,149,HG,154-O-149-HG         | 535,160,OE2,356,HH22,160-OE2-356-HH22 |
| 496,154,O,156,H,154-O-156-H           | 536,160,OE1,356,HH21,160-OE1-356-HH21 |
| 497,155,O,360,HG,155-O-360-HG         | 537,160,OE2,157,H,160-OE2-157-H       |
| 498,155,O,157,H,155-O-157-H           | 538,160,OE2,358,HH11,160-OE2-358-HH11 |
| 499,155,OG1,358,HH12,155-OG1-358-HH12 | 539,160,OE2,356,HH12,160-OE2-356-HH12 |
| 500,155,O,360,H,155-O-360-H           | 540,160,OE2,356,HE,160-OE2-356-HE     |
| 501,155,O,155,HG1,155-O-155-HG1       | 541,160,OE2,356,HH11,160-OE2-356-HH11 |
| 502,155,OG1,360,HG,155-OG1-360-HG     | 542,160,OE1,356,HE,160-OE1-356-HE     |
| 503,155,OG1,153,HG,155-OG1-153-HG     | 543,161,O,165,HZ3,161-O-165-HZ3       |
| 504,155,OG1,358,HH11,155-OG1-358-HH11 | 544,161,OE1,165,HZ1,161-OE1-165-HZ1   |
| 505,155,O,149,HG,155-O-149-HG         | 545,161,O,165,HZ2,161-O-165-HZ2       |
| 506,156,O,153,HG,156-O-153-HG         | 546,161,OE2,165,HZ3,161-OE2-165-HZ3   |
| 507,156,OG,155,HG1,156-OG-155-HG1     | 547,161,OE1,165,HZ2,161-OE1-165-HZ2   |
| 508,156,OG,358,HH12,156-OG-358-HH12   | 548,161,OE2,165,HZ2,161-OE2-165-HZ2   |
| 509,156,OG,356,HH22,156-OG-356-HH22   | 549,161,OE2,156,HG,161-OE2-156-HG     |
| 510,156,OG,153,HG,156-OG-153-HG       | 550,161,OE2,356,HE,161-OE2-356-HE     |
| 511,156,O,150,H,156-O-150-H           | 551,161,OE1,356,HH22,161-OE1-356-HH22 |
| 512,156,OG,356,HH21,156-OG-356-HH21   | 552,161,OE1,356,HE,161-OE1-356-HE     |
| 513,156,OG,150,H,156-OG-150-H         | 553,161,OE2,356,HH21,161-OE2-356-HH21 |
| 514,156,O,149,HG,156-O-149-HG         | 554,161,OE1,358,HH12,161-OE1-358-HH12 |
| 515,156,OG,157,H,156-OG-157-H         | 555,161,OE1,356,HH21,161-OE1-356-HH21 |

|                                       |                                       |
|---------------------------------------|---------------------------------------|
| 556,161,OE2,153,HG,161-OE2-153-HG     | 596,166,OE1,196,HD22,166-OE1-196-HD22 |
| 557,161,OE1,153,HG,161-OE1-153-HG     | 597,166,OE2,165,HZ3,166-OE2-165-HZ3   |
| 558,161,OE2,356,HH12,161-OE2-356-HH12 | 598,167,O,170,H,167-O-170-H           |
| 559,161,OE2,358,HH22,161-OE2-358-HH22 | 599,167,O,171,H,167-O-171-H           |
| 560,161,OE2,358,HH12,161-OE2-358-HH12 | 600,168,O,172,H,168-O-172-H           |
| 561,161,OE2,356,HH22,161-OE2-356-HH22 | 601,168,OE1,477,HH12,168-OE1-477-HH12 |
| 562,161,OE1,356,HH12,161-OE1-356-HH12 | 602,168,OE1,172,HG,168-OE1-172-HG     |
| 563,161,O,165,HZ1,161-O-165-HZ1       | 603,168,OE1,356,HH21,168-OE1-356-HH21 |
| 564,161,OE1,358,HH22,161-OE1-358-HH22 | 604,168,O,171,H,168-O-171-H           |
| 565,161,OE1,156,HG,161-OE1-156-HG     | 605,168,OE1,165,HZ3,168-OE1-165-HZ3   |
| 566,161,OE2,165,HZ1,161-OE2-165-HZ1   | 606,168,OE1,477,HH22,168-OE1-477-HH22 |
| 567,161,O,164,H,161-O-164-H           | 607,168,OE1,477,HH11,168-OE1-477-HH11 |
| 568,161,O,165,H,161-O-165-H           | 608,168,OE2,477,HH22,168-OE2-477-HH22 |
| 569,161,OE1,356,HH11,161-OE1-356-HH11 | 609,168,OE2,477,HH11,168-OE2-477-HH11 |
| 570,161,OE1,165,HZ3,161-OE1-165-HZ3   | 610,168,OE2,356,HH11,168-OE2-356-HH11 |
| 571,162,ND1,165,HZ2,162-ND1-165-HZ2   | 611,168,OE2,356,HE,168-OE2-356-HE     |
| 572,162,ND1,165,HZ3,162-ND1-165-HZ3   | 612,168,OE2,356,HH21,168-OE2-356-HH21 |
| 573,162,O,165,H,162-O-165-H           | 613,168,O,172,HG,168-O-172-HG         |
| 574,162,O,166,H,162-O-166-H           | 614,168,OE2,477,HH12,168-OE2-477-HH12 |
| 575,162,ND1,165,HZ1,162-ND1-165-HZ1   | 615,169,O,172,HG,169-O-172-HG         |
| 576,163,O,167,H,163-O-167-H           | 616,169,O,173,H,169-O-173-H           |
| 577,163,O,166,H,163-O-166-H           | 617,169,O,172,H,169-O-172-H           |
| 578,164,OG,356,HH21,164-OG-356-HH21   | 618,169,O,173,HG1,169-O-173-HG1       |
| 579,164,O,168,H,164-O-168-H           | 619,170,O,173,H,170-O-173-H           |
| 580,164,OG,356,HE,164-OG-356-HE       | 620,170,O,174,H,170-O-174-H           |
| 581,164,O,167,H,164-O-167-H           | 621,171,O,175,H,171-O-175-H           |
| 582,164,OG,356,HH11,164-OG-356-HH11   | 622,171,O,174,H,171-O-174-H           |
| 583,165,O,168,H,165-O-168-H           | 623,171,O,175,HE21,171-O-175-HE21     |
| 584,165,O,169,H,165-O-169-H           | 624,172,O,176,H,172-O-176-H           |
| 585,166,OE2,165,HZ1,166-OE2-165-HZ1   | 625,172,O,175,HE21,172-O-175-HE21     |
| 586,166,OE2,165,HZ2,166-OE2-165-HZ2   | 626,173,O,176,H,173-O-176-H           |
| 587,166,OE2,206,HH21,166-OE2-206-HH21 | 627,173,OG1,209,HE2,173-OG1-209-HE2   |
| 588,166,OE1,209,HE2,166-OE1-209-HE2   | 628,173,O,177,H,173-O-177-H           |
| 589,166,OE1,206,HE,166-OE1-206-HE     | 629,174,O,178,H,174-O-178-H           |
| 590,166,O,169,H,166-O-169-H           | 630,174,O,177,H,174-O-177-H           |
| 591,166,O,170,H,166-O-170-H           | 631,175,O,179,H,175-O-179-H           |
| 592,166,OE1,193,HG,166-OE1-193-HG     | 632,175,O,175,HE21,175-O-175-HE21     |
| 593,166,O,193,HG,166-O-193-HG         | 633,175,O,178,H,175-O-178-H           |
| 594,166,OE2,206,HE,166-OE2-206-HE     | 634,176,OE1,209,HE2,176-OE1-209-HE2   |
| 595,166,OE1,206,HH21,166-OE1-206-HH21 | 635,176,O,179,H,176-O-179-H           |

|                                       |                                       |
|---------------------------------------|---------------------------------------|
| 636,176,OE1,175,HE21,176-OE1-175-HE21 | 676,190,O,194,H,190-O-194-H           |
| 637,176,O,180,H,176-O-180-H           | 677,191,O,195,H,191-O-195-H           |
| 638,176,OE2,209,HE2,176-OE2-209-HE2   | 678,191,O,195,HG1,191-O-195-HG1       |
| 639,176,OE2,175,HE21,176-OE2-175-HE21 | 679,192,O,195,H,192-O-195-H           |
| 640,177,O,182,H,177-O-182-H           | 680,192,O,196,HD22,192-O-196-HD22     |
| 641,177,O,180,H,177-O-180-H           | 681,192,O,196,H,192-O-196-H           |
| 642,178,O,180,H,178-O-180-H           | 682,193,OG,209,HE2,193-OG-209-HE2     |
| 643,181,O,183,H,181-O-183-H           | 683,193,O,196,H,193-O-196-H           |
| 644,182,O,507,HE21,182-O-507-HE21     | 684,193,O,197,H,193-O-197-H           |
| 645,182,O,507,HE22,182-O-507-HE22     | 685,194,O,198,H,194-O-198-H           |
| 646,183,ND1,507,HE21,183-ND1-507-HE21 | 686,194,O,197,H,194-O-197-H           |
| 647,183,ND1,183,H,183-ND1-183-H       | 687,195,O,199,H,195-O-199-H           |
| 648,184,O,505,H,184-O-505-H           | 688,196,O,200,H,196-O-200-H           |
| 649,184,O,506,H,184-O-506-H           | 689,196,OD1,207,H,196-OD1-207-H       |
| 650,185,O,188,H,185-O-188-H           | 690,197,O,201,H,197-O-201-H           |
| 651,185,OD1,188,H,185-OD1-188-H       | 691,197,O,200,H,197-O-200-H           |
| 652,185,OD1,188,HH11,185-OD1-188-HH11 | 692,198,O,202,H,198-O-202-H           |
| 653,185,OD1,187,H,185-OD1-187-H       | 693,198,O,201,H,198-O-201-H           |
| 654,186,O,190,H,186-O-190-H           | 694,199,O,204,H,199-O-204-H           |
| 655,186,O,327,HG,186-O-327-HG         | 695,199,O,203,H,199-O-203-H           |
| 656,186,O,189,H,186-O-189-H           | 696,199,O,205,H,199-O-205-H           |
| 657,187,OH,222,HD22,187-OH-222-HD22   | 697,200,O,204,H,200-O-204-H           |
| 658,187,OH,499,HZ1,187-OH-499-HZ1     | 698,201,O,281,H,201-O-281-H           |
| 659,187,O,189,H,187-O-189-H           | 699,202,O,281,H,202-O-281-H           |
| 660,187,O,191,H,187-O-191-H           | 700,202,O,282,HG1,202-O-282-HG1       |
| 661,187,OH,499,HZ3,187-OH-499-HZ3     | 701,202,O,282,H,202-O-282-H           |
| 662,187,O,190,H,187-O-190-H           | 702,203,O,205,H,203-O-205-H           |
| 663,187,OH,499,HZ2,187-OH-499-HZ2     | 703,203,O,205,HE,203-O-205-HE         |
| 664,188,O,192,H,188-O-192-H           | 704,203,O,205,HH11,203-O-205-HH11     |
| 665,188,O,219,HD21,188-O-219-HD21     | 705,204,O,205,HH11,204-O-205-HH11     |
| 666,189,O,192,H,189-O-192-H           | 706,204,O,206,H,204-O-206-H           |
| 667,189,O,209,HE2,189-O-209-HE2       | 707,205,O,207,HH,205-O-207-HH         |
| 668,189,O,193,H,189-O-193-H           | 708,206,O,205,HH21,206-O-205-HH21     |
| 669,189,OH,185,H,189-OH-185-H         | 709,206,O,205,HH12,206-O-205-HH12     |
| 670,189,OH,188,HH11,189-OH-188-HH11   | 710,207,OH,205,HE,207-OH-205-HE       |
| 671,189,OH,188,HE,189-OH-188-HE       | 711,207,OH,205,HH11,207-OH-205-HH11   |
| 672,189,O,193,HG,189-O-193-HG         | 712,207,O,196,HD21,207-O-196-HD21     |
| 673,189,OH,188,HH21,189-OH-188-HH21   | 713,208,OD2,210,HD22,208-OD2-210-HD22 |
| 674,190,O,193,H,190-O-193-H           | 714,208,OD2,211,HE2,208-OD2-211-HE2   |
| 675,190,O,193,HG,190-O-193-HG         | 715,208,O,211,H,208-O-211-H           |

716,208,OD2,206,HH22,208-OD2-206-HH22  
717,208,OD1,206,HH12,208-OD1-206-HH12  
718,208,OD1,210,HD21,208-OD1-210-HD21  
719,208,OD2,209,H,208-OD2-209-H  
720,208,OD2,206,HH12,208-OD2-206-HH12  
721,208,O,210,H,208-O-210-H  
722,208,OD1,209,H,208-OD1-209-H  
723,208,OD2,208,H,208-OD2-208-H  
724,208,OD1,210,HD22,208-OD1-210-HD22  
725,208,OD1,210,H,208-OD1-210-H  
726,208,OD1,206,HH22,208-OD1-206-HH22  
727,208,OD2,210,H,208-OD2-210-H  
728,208,OD1,206,HH11,208-OD1-206-HH11  
729,208,OD2,210,HD21,208-OD2-210-HD21  
730,208,OD1,211,HE2,208-OD1-211-HE2  
731,209,ND1,209,H,209-ND1-209-H  
732,209,O,188,HH21,209-O-188-HH21  
733,209,ND1,173,HG1,209-ND1-173-HG1  
734,209,O,188,HE,209-O-188-HE  
735,209,ND1,210,HD22,209-ND1-210-HD22  
736,209,ND1,193,HG,209-ND1-193-HG  
737,209,ND1,210,H,209-ND1-210-H  
738,209,O,210,HD22,209-O-210-HD22  
739,209,ND1,188,HE,209-ND1-188-HE  
740,209,ND1,188,HH21,209-ND1-188-HH21  
741,210,OD1,210,H,210-OD1-210-H  
742,210,O,212,HE21,210-O-212-HE21  
743,210,O,210,HD22,210-O-210-HD22  
744,211,ND1,214,H,211-ND1-214-H  
745,211,ND1,212,H,211-ND1-212-H  
746,211,O,214,H,211-O-214-H  
747,211,O,215,H,211-O-215-H  
748,211,ND1,208,H,211-ND1-208-H  
749,211,ND1,207,HH,211-ND1-207-HH  
750,211,ND1,213,H,211-ND1-213-H  
751,212,O,212,HE21,212-O-212-HE21  
752,212,OE1,212,H,212-OE1-212-H  
753,212,OE1,219,HD21,212-OE1-219-HD21  
754,212,O,216,HG,212-O-216-HG  
755,212,O,216,H,212-O-216-H  
756,213,O,257,HZ1,213-O-257-HZ1  
757,213,OE1,264,HZ1,213-OE1-264-HZ1  
758,213,O,217,H,213-O-217-H  
759,213,OE2,207,HH,213-OE2-207-HH  
760,213,OE2,212,HE21,213-OE2-212-HE21  
761,213,OE1,212,HE21,213-OE1-212-HE21  
762,213,OE2,264,HZ3,213-OE2-264-HZ3  
763,213,O,257,HZ2,213-O-257-HZ2  
764,213,OE1,264,HZ3,213-OE1-264-HZ3  
765,213,O,216,HG,213-O-216-HG  
766,213,OE2,264,HZ2,213-OE2-264-HZ2  
767,213,OE1,257,HZ1,213-OE1-257-HZ1  
768,213,OE1,213,H,213-OE1-213-H  
769,213,O,216,H,213-O-216-H  
770,213,OE1,264,HZ2,213-OE1-264-HZ2  
771,213,OE1,257,HZ2,213-OE1-257-HZ2  
772,213,OE1,207,HH,213-OE1-207-HH  
773,213,OE1,212,HE22,213-OE1-212-HE22  
774,213,OE2,257,HZ1,213-OE2-257-HZ1  
775,213,OE2,264,HZ1,213-OE2-264-HZ1  
776,213,OE2,213,H,213-OE2-213-H  
777,213,OE2,212,HE22,213-OE2-212-HE22  
778,213,OE1,257,HZ3,213-OE1-257-HZ3  
779,213,OE2,257,HZ3,213-OE2-257-HZ3  
780,213,OE2,211,HE2,213-OE2-211-HE2  
781,213,OE1,260,HG,213-OE1-260-HG  
782,213,O,257,HZ3,213-O-257-HZ3  
783,213,OE2,257,HZ2,213-OE2-257-HZ2  
784,213,OE2,260,HG,213-OE2-260-HG  
785,214,O,217,H,214-O-217-H  
786,214,O,219,HD22,214-O-219-HD22  
787,214,O,218,H,214-O-218-H  
788,215,O,219,HD22,215-O-219-HD22  
789,215,O,220,H,215-O-220-H  
790,215,O,188,HH12,215-O-188-HH12  
791,215,O,218,H,215-O-218-H  
792,215,O,219,H,215-O-219-H  
793,216,OG,257,HZ3,216-OG-257-HZ3  
794,216,OG,212,HE21,216-OG-212-HE21  
795,216,OG,257,HZ2,216-OG-257-HZ2

796,216,O,257,HZ2,216-O-257-HZ2  
797,216,O,220,H,216-O-220-H  
798,216,O,219,H,216-O-219-H  
799,216,O,257,HZ1,216-O-257-HZ1  
800,216,O,257,HZ3,216-O-257-HZ3  
801,216,O,216,HG,216-O-216-HG  
802,216,OG,257,HZ1,216-OG-257-HZ1  
803,217,O,222,HD21,217-O-222-HD21  
804,217,O,222,HD22,217-O-222-HD22  
805,217,O,220,H,217-O-220-H  
806,218,O,220,H,218-O-220-H  
807,218,O,222,HD21,218-O-222-HD21  
808,218,O,219,HD22,218-O-219-HD22  
809,218,O,187,HH,218-O-187-HH  
810,218,O,222,HD22,218-O-222-HD22  
811,219,OD1,188,HH12,219-OD1-188-HH12  
812,219,O,222,HD21,219-O-222-HD21  
813,219,OD1,188,HH22,219-OD1-188-HH22  
814,219,OD1,188,HH11,219-OD1-188-HH11  
815,219,O,222,H,219-O-222-H  
816,219,O,219,HD22,219-O-219-HD22  
817,219,OD1,188,HH21,219-OD1-188-HH21  
818,219,O,222,HD22,219-O-222-HD22  
819,220,O,222,HD21,220-O-222-HD21  
820,220,O,257,HZ3,220-O-257-HZ3  
821,220,O,222,H,220-O-222-H  
822,221,O,224,H,221-O-224-H  
823,221,OD1,257,HZ1,221-OD1-257-HZ1  
824,221,OD1,257,HZ3,221-OD1-257-HZ3  
825,221,OD1,257,HZ2,221-OD1-257-HZ2  
826,221,O,223,H,221-O-223-H  
827,222,OD1,187,HH,222-OD1-187-HH  
828,222,OD1,224,H,222-OD1-224-H  
829,222,OD1,222,H,222-OD1-222-H  
830,222,O,224,H,222-O-224-H  
831,222,OD1,220,H,222-OD1-220-H  
832,222,OD1,188,HH22,222-OD1-188-HH22  
833,222,O,223,HD22,222-O-223-HD22  
834,222,O,222,HD21,222-O-222-HD21  
835,222,OD1,499,HZ3,222-OD1-499-HZ3  
836,222,OD1,223,H,222-OD1-223-H  
837,222,OD1,499,HZ1,222-OD1-499-HZ1  
838,222,OD1,188,HH21,222-OD1-188-HH21  
839,223,O,227,H,223-O-227-H  
840,223,O,226,H,223-O-226-H  
841,223,OD1,222,HD21,223-OD1-222-HD21  
842,223,O,223,HD22,223-O-223-HD22  
843,223,O,247,HG,223-O-247-HG  
844,223,OD1,225,H,223-OD1-225-H  
845,223,OD1,223,H,223-OD1-223-H  
846,223,OD1,247,HG,223-OD1-247-HG  
847,224,O,227,H,224-O-227-H  
848,224,O,228,H,224-O-228-H  
849,224,O,247,HG,224-O-247-HG  
850,225,O,227,H,225-O-227-H  
851,225,O,229,H,225-O-229-H  
852,225,O,496,H,225-O-496-H  
853,225,O,228,H,225-O-228-H  
854,226,OE1,232,HD21,226-OE1-232-HD21  
855,226,O,232,HD22,226-O-232-HD22  
856,226,OE2,241,HH21,226-OE2-241-HH21  
857,226,OE2,223,HD22,226-OE2-223-HD22  
858,226,OE1,57,HZ2,226-OE1-57-HZ2  
859,226,O,229,H,226-O-229-H  
860,226,OE2,245,HD21,226-OE2-245-HD21  
861,226,OE2,232,HD21,226-OE2-232-HD21  
862,226,OE1,247,HG,226-OE1-247-HG  
863,226,OE2,223,HD21,226-OE2-223-HD21  
864,226,OE2,57,HZ2,226-OE2-57-HZ2  
865,226,OE2,226,H,226-OE2-226-H  
866,226,OE1,226,H,226-OE1-226-H  
867,226,OE1,223,HD21,226-OE1-223-HD21  
868,226,OE1,57,HZ1,226-OE1-57-HZ1  
869,226,OE1,223,HD22,226-OE1-223-HD22  
870,226,OE1,245,HD21,226-OE1-245-HD21  
871,226,O,241,HH21,226-O-241-HH21  
872,226,OE1,57,HZ3,226-OE1-57-HZ3  
873,226,OE2,247,HG,226-OE2-247-HG  
874,226,OE2,57,HZ3,226-OE2-57-HZ3  
875,226,OE2,57,HZ1,226-OE2-57-HZ1



876,226,O,232,HD21,226-O-232-HD21  
877,227,O,232,HD21,227-O-232-HD21  
878,227,O,111,HG1,227-O-111-HG1  
879,227,O,232,HD22,227-O-232-HD22  
880,227,O,229,H,227-O-229-H  
881,227,O,241,HH21,227-O-241-HH21  
882,228,O,232,HD22,228-O-232-HD22  
883,228,O,496,H,228-O-496-H  
884,228,O,230,HG,228-O-230-HG  
885,229,O,232,HD21,229-O-232-HD21  
886,229,O,494,HH,229-O-494-HH  
887,229,O,232,H,229-O-232-H  
888,229,O,232,HD22,229-O-232-HD22  
889,229,O,231,H,229-O-231-H  
890,230,O,494,HH,230-O-494-HH  
891,230,O,230,HG,230-O-230-HG  
892,230,O,232,H,230-O-232-H  
893,230,OG,494,HH,230-OG-494-HH  
894,232,O,236,H,232-O-236-H  
895,232,OD1,234,H,232-OD1-234-H  
896,232,O,235,H,232-O-235-H  
897,232,OD1,235,H,232-OD1-235-H  
898,232,ND2,235,H,232-ND2-235-H  
899,233,O,236,H,233-O-236-H  
900,233,O,237,H,233-O-237-H  
901,233,O,235,H,233-O-235-H  
902,234,O,241,HH11,234-O-241-HH11  
903,234,O,241,HE,234-O-241-HE  
904,234,O,241,HH21,234-O-241-HH21  
905,234,O,241,HH12,234-O-241-HH12  
906,235,OD2,241,HH11,235-OD2-241-HH11  
907,235,O,241,HH11,235-O-241-HH11  
908,235,OD2,241,HH21,235-OD2-241-HH21  
909,235,OD2,241,HH12,235-OD2-241-HH12  
910,235,OD1,241,HH11,235-OD1-241-HH11  
911,235,OD1,241,HH12,235-OD1-241-HH12  
912,235,OD1,111,H,235-OD1-111-H  
913,235,OD1,241,HE,235-OD1-241-HE  
914,235,OD1,241,HH21,235-OD1-241-HH21  
915,235,O,241,HH12,235-O-241-HH12

916,235,OD2,241,HE,235-OD2-241-HE  
917,235,O,241,HH21,235-O-241-HH21  
918,235,OD2,232,HD22,235-OD2-232-HD22  
919,235,OD1,232,HD21,235-OD1-232-HD21  
920,235,OD2,232,HD21,235-OD2-232-HD21  
921,235,OD1,110,H,235-OD1-110-H  
922,235,OD2,110,H,235-OD2-110-H  
923,235,OD2,111,HG1,235-OD2-111-HG1  
924,235,OD2,241,HH22,235-OD2-241-HH22  
925,235,OD1,232,HD22,235-OD1-232-HD22  
926,235,OD2,111,H,235-OD2-111-H  
927,235,O,241,HE,235-O-241-HE  
928,235,OD1,241,HH22,235-OD1-241-HH22  
929,235,OD1,111,HG1,235-OD1-111-HG1  
930,236,O,241,HH21,236-O-241-HH21  
931,236,O,241,HH11,236-O-241-HH11  
932,236,O,241,HE,236-O-241-HE  
933,236,O,81,HG1,236-O-81-HG1  
934,237,O,241,H,237-O-241-H  
935,237,O,240,H,237-O-240-H  
936,237,O,239,H,237-O-239-H  
937,238,O,241,H,238-O-241-H  
938,238,O,242,H,238-O-242-H  
939,239,O,242,H,239-O-242-H  
940,239,O,243,H,239-O-243-H  
941,240,O,245,HD22,240-O-245-HD22  
942,240,O,243,H,240-O-243-H  
943,241,O,241,HH11,241-O-241-HH11  
944,242,OH,241,HH21,242-OH-241-HH21  
945,243,O,245,H,243-O-245-H  
946,244,O,249,HD21,244-O-249-HD21  
947,245,OD1,247,H,245-OD1-247-H  
948,245,O,248,H,245-O-248-H  
949,245,OD1,247,HG,245-OD1-247-HG  
950,245,O,249,H,245-O-249-H  
951,245,OD1,248,H,245-OD1-248-H  
952,245,O,249,HD22,245-O-249-HD22  
953,246,O,249,H,246-O-249-H  
954,246,O,249,HD22,246-O-249-HD22  
955,246,O,223,HD21,246-O-223-HD21

|                                       |                                       |
|---------------------------------------|---------------------------------------|
| 956,246,O,250,H,246-O-250-H           | 996,253,OD2,257,HZ2,253-OD2-257-HZ2   |
| 957,247,OG,245,HD21,247-OG-245-HD21   | 997,253,OD2,252,HZ3,253-OD2-252-HZ3   |
| 958,247,O,250,H,247-O-250-H           | 998,253,OD1,221,HD22,253-OD1-221-HD22 |
| 959,247,OG,248,H,247-OG-248-H         | 999,253,OD1,257,HZ3,253-OD1-257-HZ3   |
| 960,247,OG,223,HD21,247-OG-223-HD21   | 1000,253,OD1,257,HZ2,253-OD1-257-HZ2  |
| 961,247,O,223,HD21,247-O-223-HD21     | 1001,253,OD2,257,HZ1,253-OD2-257-HZ1  |
| 962,247,OG,223,HD22,247-OG-223-HD22   | 1002,253,OD1,257,HZ1,253-OD1-257-HZ1  |
| 963,247,O,251,H,247-O-251-H           | 1003,254,O,258,H,254-O-258-H          |
| 964,248,O,252,H,248-O-252-H           | 1004,254,O,257,H,254-O-257-H          |
| 965,248,O,251,H,248-O-251-H           | 1005,255,O,259,H,255-O-259-H          |
| 966,249,OD1,245,H,249-OD1-245-H       | 1006,255,OD1,116,H,255-OD1-116-H      |
| 967,249,O,249,HD22,249-O-249-HD22     | 1007,256,OE2,257,HZ2,256-OE2-257-HZ2  |
| 968,249,OD1,252,HZ1,249-OD1-252-HZ1   | 1008,256,OE1,257,HZ1,256-OE1-257-HZ1  |
| 969,249,O,253,H,249-O-253-H           | 1009,256,OE2,260,HG,256-OE2-260-HG    |
| 970,249,O,252,H,249-O-252-H           | 1010,256,O,260,H,256-O-260-H          |
| 971,249,OD1,252,HZ3,249-OD1-252-HZ3   | 1011,256,O,260,HG,256-O-260-HG        |
| 972,249,OD1,252,HZ2,249-OD1-252-HZ2   | 1012,256,OE1,257,HZ2,256-OE1-257-HZ2  |
| 973,250,O,254,H,250-O-254-H           | 1013,256,OE2,257,HZ3,256-OE2-257-HZ3  |
| 974,250,O,221,HD22,250-O-221-HD22     | 1014,256,OE1,252,HZ2,256-OE1-252-HZ2  |
| 975,250,O,253,H,250-O-253-H           | 1015,256,OE1,260,HG,256-OE1-260-HG    |
| 976,251,O,255,H,251-O-255-H           | 1016,256,OE2,252,HZ2,256-OE2-252-HZ2  |
| 977,251,O,255,HD22,251-O-255-HD22     | 1017,256,OE1,252,HZ1,256-OE1-252-HZ1  |
| 978,252,O,256,H,252-O-256-H           | 1018,256,OE2,252,HZ3,256-OE2-252-HZ3  |
| 979,252,O,255,H,252-O-255-H           | 1019,256,OE2,257,HZ1,256-OE2-257-HZ1  |
| 980,252,O,254,H,252-O-254-H           | 1020,256,OE2,252,HZ1,256-OE2-252-HZ1  |
| 981,253,OD1,252,HZ1,253-OD1-252-HZ1   | 1021,256,OE1,257,HZ3,256-OE1-257-HZ3  |
| 982,253,OD1,252,HZ3,253-OD1-252-HZ3   | 1022,256,OE1,252,HZ3,256-OE1-252-HZ3  |
| 983,253,O,256,H,253-O-256-H           | 1023,257,O,261,H,257-O-261-H          |
| 984,253,O,257,HZ1,253-O-257-HZ1       | 1024,257,O,260,HG,257-O-260-HG        |
| 985,253,O,257,HZ2,253-O-257-HZ2       | 1025,258,O,261,H,258-O-261-H          |
| 986,253,O,257,HZ3,253-O-257-HZ3       | 1026,258,O,262,H,258-O-262-H          |
| 987,253,OD2,249,HD21,253-OD2-249-HD21 | 1027,259,O,263,H,259-O-263-H          |
| 988,253,OD2,221,HD22,253-OD2-221-HD22 | 1028,259,O,262,H,259-O-262-H          |
| 989,253,O,257,H,253-O-257-H           | 1029,259,OH,263,HE21,259-OH-263-HE21  |
| 990,253,OD2,252,HZ2,253-OD2-252-HZ2   | 1030,259,OH,263,HE22,259-OH-263-HE22  |
| 991,253,OD2,257,HZ3,253-OD2-257-HZ3   | 1031,259,O,263,HE21,259-O-263-HE21    |
| 992,253,OD2,221,HD21,253-OD2-221-HD21 | 1032,260,O,263,HE21,260-O-263-HE21    |
| 993,253,OD1,252,HZ2,253-OD1-252-HZ2   | 1033,260,OG,264,HZ3,260-OG-264-HZ3    |
| 994,253,OD1,221,HD21,253-OD1-221-HD21 | 1034,260,O,264,HZ3,260-O-264-HZ3      |
| 995,253,OD2,252,HZ1,253-OD2-252-HZ1   | 1035,260,O,264,H,260-O-264-H          |

|                                        |                                        |
|----------------------------------------|----------------------------------------|
| 1036,260,OG,264,HZ1,260-OG-264-HZ1     | 1076,268,OE1,205,HH21,268-OE1-205-HH21 |
| 1037,260,O,264,HZ2,260-O-264-HZ2       | 1077,268,O,272,HG1,268-O-272-HG1       |
| 1038,260,OG,264,HZ2,260-OG-264-HZ2     | 1078,268,OE2,267,HZ1,268-OE2-267-HZ1   |
| 1039,260,O,264,HZ1,260-O-264-HZ1       | 1079,268,OE1,264,HZ3,268-OE1-264-HZ3   |
| 1040,261,O,265,H,261-O-265-H           | 1080,268,OE2,271,HZ2,268-OE2-271-HZ2   |
| 1041,261,O,264,H,261-O-264-H           | 1081,268,OE1,271,HZ1,268-OE1-271-HZ1   |
| 1042,262,O,265,H,262-O-265-H           | 1082,268,OE1,271,HZ2,268-OE1-271-HZ2   |
| 1043,262,O,266,H,262-O-266-H           | 1083,268,O,272,H,268-O-272-H           |
| 1044,263,O,267,HZ2,263-O-267-HZ2       | 1084,268,OE1,271,HZ3,268-OE1-271-HZ3   |
| 1045,263,OE1,259,HH,263-OE1-259-HH     | 1085,268,OE1,267,HZ1,268-OE1-267-HZ1   |
| 1046,263,O,267,H,263-O-267-H           | 1086,268,OE1,264,HZ2,268-OE1-264-HZ2   |
| 1047,263,O,267,HZ1,263-O-267-HZ1       | 1087,268,OE1,267,HZ2,268-OE1-267-HZ2   |
| 1048,263,O,267,HZ3,263-O-267-HZ3       | 1088,268,OE2,271,HZ3,268-OE2-271-HZ3   |
| 1049,263,OE1,267,HZ1,263-OE1-267-HZ1   | 1089,268,OE2,264,HZ2,268-OE2-264-HZ2   |
| 1050,263,O,266,H,263-O-266-H           | 1090,268,OE1,205,HH12,268-OE1-205-HH12 |
| 1051,263,O,263,HE21,263-O-263-HE21     | 1091,268,O,271,H,268-O-271-H           |
| 1052,263,OE1,267,HZ2,263-OE1-267-HZ2   | 1092,268,O,271,HZ3,268-O-271-HZ3       |
| 1053,263,OE1,267,HZ3,263-OE1-267-HZ3   | 1093,268,OE2,205,HE,268-OE2-205-HE     |
| 1054,264,O,268,H,264-O-268-H           | 1094,268,OE1,205,HH22,268-OE1-205-HH22 |
| 1055,264,O,267,HZ1,264-O-267-HZ1       | 1095,269,ND1,205,HH21,269-ND1-205-HH21 |
| 1056,265,O,205,HH22,265-O-205-HH22     | 1096,269,O,273,H,269-O-273-H           |
| 1057,265,O,269,H,265-O-269-H           | 1097,269,O,279,HH12,269-O-279-HH12     |
| 1058,265,O,268,H,265-O-268-H           | 1098,269,O,272,HG1,269-O-272-HG1       |
| 1059,265,O,205,HE,265-O-205-HE         | 1099,269,ND1,205,HH22,269-ND1-205-HH22 |
| 1060,266,O,270,H,266-O-270-H           | 1100,269,O,279,HH22,269-O-279-HH22     |
| 1061,266,O,269,H,266-O-269-H           | 1101,269,O,272,H,269-O-272-H           |
| 1062,267,O,271,HZ2,267-O-271-HZ2       | 1102,269,ND1,205,HH12,269-ND1-205-HH12 |
| 1063,267,O,271,H,267-O-271-H           | 1103,270,OH,267,HZ1,270-OH-267-HZ1     |
| 1064,267,O,270,H,267-O-270-H           | 1104,270,O,273,H,270-O-273-H           |
| 1065,267,O,271,HZ3,267-O-271-HZ3       | 1105,270,OH,290,HE22,270-OH-290-HE22   |
| 1066,267,O,271,HZ1,267-O-271-HZ1       | 1106,270,OH,290,HE21,270-OH-290-HE21   |
| 1067,268,OE1,205,HE,268-OE1-205-HE     | 1107,271,O,272,HG1,271-O-272-HG1       |
| 1068,268,OE1,264,HZ1,268-OE1-264-HZ1   | 1108,271,O,273,H,271-O-273-H           |
| 1069,268,OE2,271,HZ1,268-OE2-271-HZ1   | 1109,272,O,279,HH22,272-O-279-HH22     |
| 1070,268,OE2,205,HH22,268-OE2-205-HH22 | 1110,272,OG1,279,HH12,272-OG1-279-HH12 |
| 1071,268,OE2,205,HH12,268-OE2-205-HH12 | 1111,272,OG1,205,HH22,272-OG1-205-HH22 |
| 1072,268,OE2,205,HH21,268-OE2-205-HH21 | 1112,272,OG1,205,HH21,272-OG1-205-HH21 |
| 1073,268,OE2,267,HZ2,268-OE2-267-HZ2   | 1113,272,O,279,HH12,272-O-279-HH12     |
| 1074,268,OE2,267,HZ3,268-OE2-267-HZ3   | 1114,272,OG1,279,HH22,272-OG1-279-HH22 |
| 1075,268,OE1,267,HZ3,268-OE1-267-HZ3   | 1115,272,OG1,205,HH12,272-OG1-205-HH12 |

|                                        |                                        |
|----------------------------------------|----------------------------------------|
| 1116,273,O,275,H,273-O-275-H           | 1156,283,O,286,H,283-O-286-H           |
| 1117,273,O,275,HZ3,273-O-275-HZ3       | 1157,283,OD2,279,H,283-OD2-279-H       |
| 1118,274,OE2,272,HG1,274-OE2-272-HG1   | 1158,283,OD1,279,H,283-OD1-279-H       |
| 1119,274,OE1,275,HZ3,274-OE1-275-HZ3   | 1159,283,OD2,269,HE2,283-OD2-269-HE2   |
| 1120,274,OE1,277,HE2,274-OE1-277-HE2   | 1160,283,OD2,279,HH21,283-OD2-279-HH21 |
| 1121,274,OE2,276,H,274-OE2-276-H       | 1161,283,O,287,H,283-O-287-H           |
| 1122,274,OE1,275,HZ2,274-OE1-275-HZ2   | 1162,284,O,287,H,284-O-287-H           |
| 1123,274,O,276,H,274-O-276-H           | 1163,284,O,284,HG,284-O-284-HG         |
| 1124,274,OE1,275,H,274-OE1-275-H       | 1164,284,O,288,H,284-O-288-H           |
| 1125,274,OE1,276,H,274-OE1-276-H       | 1165,285,O,288,H,285-O-288-H           |
| 1126,274,OE2,279,HH12,274-OE2-279-HH12 | 1166,285,O,289,H,285-O-289-H           |
| 1127,274,OE2,275,HZ1,274-OE2-275-HZ1   | 1167,286,O,290,HE21,286-O-290-HE21     |
| 1128,274,OE2,275,H,274-OE2-275-H       | 1168,286,O,290,H,286-O-290-H           |
| 1129,274,OE1,275,HZ1,274-OE1-275-HZ1   | 1169,286,O,290,HE22,286-O-290-HE22     |
| 1130,274,OE2,279,HH11,274-OE2-279-HH11 | 1170,286,O,289,H,286-O-289-H           |
| 1131,274,O,277,H,274-O-277-H           | 1171,287,OE1,275,HZ2,287-OE1-275-HZ2   |
| 1132,274,OE2,273,H,274-OE2-273-H       | 1172,287,OE1,290,HE22,287-OE1-290-HE22 |
| 1133,275,O,277,H,275-O-277-H           | 1173,287,OE2,290,HE21,287-OE2-290-HE21 |
| 1134,276,O,278,H,276-O-278-H           | 1174,287,OE1,275,HZ1,287-OE1-275-HZ1   |
| 1135,277,ND1,278,H,277-ND1-278-H       | 1175,287,OE1,290,HE21,287-OE1-290-HE21 |
| 1136,277,O,279,HE,277-O-279-HE         | 1176,287,OE1,276,H,287-OE1-276-H       |
| 1137,277,ND1,279,HE,277-ND1-279-HE     | 1177,287,O,290,H,287-O-290-H           |
| 1138,277,ND1,279,HH11,277-ND1-279-HH11 | 1178,287,OE2,275,HZ3,287-OE2-275-HZ3   |
| 1139,280,OD1,269,HE2,280-OD1-269-HE2   | 1179,287,O,290,HE21,287-O-290-HE21     |
| 1140,280,OD1,282,HG1,280-OD1-282-HG1   | 1180,287,O,291,H,287-O-291-H           |
| 1141,280,OD2,269,HE2,280-OD2-269-HE2   | 1181,287,OE2,275,HZ2,287-OE2-275-HZ2   |
| 1142,280,O,283,H,280-O-283-H           | 1182,287,OE1,275,HZ3,287-OE1-275-HZ3   |
| 1143,280,O,284,H,280-O-284-H           | 1183,287,OE2,276,H,287-OE2-276-H       |
| 1144,280,OD1,282,H,280-OD1-282-H       | 1184,287,OE2,275,HZ1,287-OE2-275-HZ1   |
| 1145,280,OD1,283,H,280-OD1-283-H       | 1185,288,O,292,H,288-O-292-H           |
| 1146,280,OD2,205,HH12,280-OD2-205-HH12 | 1186,288,O,291,H,288-O-291-H           |
| 1147,280,O,284,HG,280-O-284-HG         | 1187,289,O,293,HE21,289-O-293-HE21     |
| 1148,281,O,284,H,281-O-284-H           | 1188,289,O,293,H,289-O-293-H           |
| 1149,281,O,285,H,281-O-285-H           | 1189,289,O,292,HZ1,289-O-292-HZ1       |
| 1150,281,O,284,HG,281-O-284-HG         | 1190,289,O,292,HZ2,289-O-292-HZ2       |
| 1151,282,O,286,H,282-O-286-H           | 1191,289,O,293,HE22,289-O-293-HE22     |
| 1152,282,O,285,H,282-O-285-H           | 1192,289,O,292,HZ3,289-O-292-HZ3       |
| 1153,283,OD1,279,HE,283-OD1-279-HE     | 1193,290,O,293,H,290-O-293-H           |
| 1154,283,OD2,279,HE,283-OD2-279-HE     | 1194,290,OE1,293,HE21,290-OE1-293-HE21 |
| 1155,283,OD1,279,HH21,283-OD1-279-HH21 | 1195,290,OE1,275,HZ1,290-OE1-275-HZ1   |

1196,290,OE1,293,HE22,290-OE1-293-HE22  
1197,290,O,294,H,290-O-294-H  
1198,290,O,292,H,290-O-292-H  
1199,290,O,290,HE21,290-O-290-HE21  
1200,290,OE1,275,HZ2,290-OE1-275-HZ2  
1201,290,OE1,275,HZ3,290-OE1-275-HZ3  
1202,290,O,293,HE21,290-O-293-HE21  
1203,290,OE1,270,HH,290-OE1-270-HH  
1204,290,O,293,HE22,290-O-293-HE22  
1205,291,OE1,290,HE21,291-OE1-290-HE21  
1206,291,OE2,290,HE21,291-OE2-290-HE21  
1207,291,O,294,H,291-O-294-H  
1208,291,OE1,293,HE21,291-OE1-293-HE21  
1209,291,OE1,290,HE22,291-OE1-290-HE22  
1210,291,OE2,275,HZ2,291-OE2-275-HZ2  
1211,291,OE2,290,HE22,291-OE2-290-HE22  
1212,291,OE1,275,HZ2,291-OE1-275-HZ2  
1213,291,O,295,H,291-O-295-H  
1214,291,OE1,275,HZ1,291-OE1-275-HZ1  
1215,291,OE2,293,HE22,291-OE2-293-HE22  
1216,291,OE2,275,HZ3,291-OE2-275-HZ3  
1217,291,OE2,293,HE21,291-OE2-293-HE21  
1218,291,OE1,293,HE22,291-OE1-293-HE22  
1219,291,OE2,275,HZ1,291-OE2-275-HZ1  
1220,291,OE1,275,HZ3,291-OE1-275-HZ3  
1221,292,O,295,H,292-O-295-H  
1222,293,O,293,HE21,293-O-293-HE21  
1223,293,OE1,292,HZ1,293-OE1-292-HZ1  
1224,293,OE1,290,HE21,293-OE1-290-HE21  
1225,293,OE1,292,HZ2,293-OE1-292-HZ2  
1226,293,OE1,290,HE22,293-OE1-290-HE22  
1227,293,OE1,293,H,293-OE1-293-H  
1228,293,O,295,H,293-O-295-H  
1229,293,OE1,300,H,293-OE1-300-H  
1230,294,O,296,H,294-O-296-H  
1231,295,OD2,297,HD21,295-OD2-297-HD21  
1232,295,OD2,136,HH12,295-OD2-136-HH12  
1233,295,OD2,136,HH22,295-OD2-136-HH22  
1234,295,O,297,H,295-O-297-H  
1235,295,OD1,136,HH21,295-OD1-136-HH21  
1236,295,OD1,136,HH11,295-OD1-136-HH11  
1237,295,OD1,288,HE2,295-OD1-288-HE2  
1238,295,OD2,136,HH11,295-OD2-136-HH11  
1239,295,OD1,136,HE,295-OD1-136-HE  
1240,295,OD2,298,H,295-OD2-298-H  
1241,295,OD1,136,HH22,295-OD1-136-HH22  
1242,295,O,298,H,295-O-298-H  
1243,295,OD1,297,HD21,295-OD1-297-HD21  
1244,295,O,299,HD22,295-O-299-HD22  
1245,295,OD1,136,HH12,295-OD1-136-HH12  
1246,295,OD2,296,H,295-OD2-296-H  
1247,295,OD1,297,H,295-OD1-297-H  
1248,295,OD1,298,H,295-OD1-298-H  
1249,295,OD1,296,H,295-OD1-296-H  
1250,295,OD2,136,HH21,295-OD2-136-HH21  
1251,295,OD2,297,H,295-OD2-297-H  
1252,295,OD2,288,HE2,295-OD2-288-HE2  
1253,296,OE1,297,HD21,296-OE1-297-HD21  
1254,296,O,298,H,296-O-298-H  
1255,296,OE2,136,HH22,296-OE2-136-HH22  
1256,296,OE1,136,HH22,296-OE1-136-HH22  
1257,296,OE1,136,HH12,296-OE1-136-HH12  
1258,296,OE2,136,HH12,296-OE2-136-HH12  
1259,296,O,299,HD21,296-O-299-HD21  
1260,296,OE1,296,H,296-OE1-296-H  
1261,296,OE1,297,HD22,296-OE1-297-HD22  
1262,296,OE1,136,HH11,296-OE1-136-HH11  
1263,296,OE2,297,HD22,296-OE2-297-HD22  
1264,296,OE2,296,H,296-OE2-296-H  
1265,296,OE2,136,HH21,296-OE2-136-HH21  
1266,296,OE1,136,HH21,296-OE1-136-HH21  
1267,296,OE2,297,HD21,296-OE2-297-HD21  
1268,296,O,297,HD21,296-O-297-HD21  
1269,296,OE1,136,HE,296-OE1-136-HE  
1270,297,O,299,HD22,297-O-299-HD22  
1271,297,O,297,HD21,297-O-297-HD21  
1272,297,OD1,136,HH21,297-OD1-136-HH21  
1273,297,OD1,136,HH22,297-OD1-136-HH22  
1274,297,N,297,HD21,297-N-297-HD21  
1275,297,OD1,136,HH11,297-OD1-136-HH11

|                                        |                                        |
|----------------------------------------|----------------------------------------|
| 1276,297,O,136,HH21,297-O-136-HH21     | 1316,303,OG,306,HZ3,303-OG-306-HZ3     |
| 1277,297,OD1,136,HH12,297-OD1-136-HH12 | 1317,303,OG,306,HZ1,303-OG-306-HZ1     |
| 1278,297,OD1,136,HE,297-OD1-136-HE     | 1318,304,OD1,293,HE22,304-OD1-293-HE22 |
| 1279,297,OD1,140,HD21,297-OD1-140-HD21 | 1319,304,OD2,292,HZ2,304-OD2-292-HZ2   |
| 1280,297,O,299,H,297-O-299-H           | 1320,304,OD1,293,HE21,304-OD1-293-HE21 |
| 1281,297,ND2,136,HH12,297-ND2-136-HH12 | 1321,304,OD2,292,HZ3,304-OD2-292-HZ3   |
| 1282,299,OD1,301,HE21,299-OD1-301-HE21 | 1322,304,OD2,293,HE21,304-OD2-293-HE21 |
| 1283,299,O,292,HZ2,299-O-292-HZ2       | 1323,304,O,307,H,304-O-307-H           |
| 1284,299,OD1,301,H,299-OD1-301-H       | 1324,304,OD2,304,H,304-OD2-304-H       |
| 1285,299,OD1,302,H,299-OD1-302-H       | 1325,304,OD1,292,HZ1,304-OD1-292-HZ1   |
| 1286,299,O,302,H,299-O-302-H           | 1326,304,OD2,292,HZ1,304-OD2-292-HZ1   |
| 1287,299,O,292,HZ1,299-O-292-HZ1       | 1327,304,OD2,305,H,304-OD2-305-H       |
| 1288,299,OD1,300,H,299-OD1-300-H       | 1328,304,OD1,304,H,304-OD1-304-H       |
| 1289,299,O,292,HZ3,299-O-292-HZ3       | 1329,304,OD1,305,H,304-OD1-305-H       |
| 1290,299,ND2,301,H,299-ND2-301-H       | 1330,304,O,308,H,304-O-308-H           |
| 1291,300,O,302,H,300-O-302-H           | 1331,304,OD1,292,HZ3,304-OD1-292-HZ3   |
| 1292,300,O,292,HZ2,300-O-292-HZ2       | 1332,304,OD2,293,HE22,304-OD2-293-HE22 |
| 1293,300,O,292,HZ3,300-O-292-HZ3       | 1333,304,OD1,292,HZ2,304-OD1-292-HZ2   |
| 1294,300,O,292,HZ1,300-O-292-HZ1       | 1334,305,OE1,263,HE22,305-OE1-263-HE22 |
| 1295,300,O,301,HE21,300-O-301-HE21     | 1335,305,OE2,309,HD22,305-OE2-309-HD22 |
| 1296,301,OE1,299,HD21,301-OE1-299-HD21 | 1336,305,OE1,117,HD21,305-OE1-117-HD21 |
| 1297,301,O,301,HE21,301-O-301-HE21     | 1337,305,OE1,119,HE21,305-OE1-119-HE21 |
| 1298,301,OE1,301,H,301-OE1-301-H       | 1338,305,O,309,HD21,305-O-309-HD21     |
| 1299,301,OE1,299,HD22,301-OE1-299-HD22 | 1339,305,O,309,H,305-O-309-H           |
| 1300,301,OE1,302,H,301-OE1-302-H       | 1340,305,O,308,H,305-O-308-H           |
| 1301,301,O,306,HZ2,301-O-306-HZ2       | 1341,305,OE1,305,H,305-OE1-305-H       |
| 1302,301,OE1,292,HZ3,301-OE1-292-HZ3   | 1342,305,O,309,HD22,305-O-309-HD22     |
| 1303,301,O,306,HZ1,301-O-306-HZ1       | 1343,305,OE2,306,HZ2,305-OE2-306-HZ2   |
| 1304,301,O,306,HZ3,301-O-306-HZ3       | 1344,305,O,119,HE22,305-O-119-HE22     |
| 1305,301,O,303,H,301-O-303-H           | 1345,305,OE1,306,HZ2,305-OE1-306-HZ2   |
| 1306,302,O,292,HZ2,302-O-292-HZ2       | 1346,305,OE2,306,H,305-OE2-306-H       |
| 1307,302,O,292,HZ3,302-O-292-HZ3       | 1347,305,OE2,119,HE21,305-OE2-119-HE21 |
| 1308,302,O,292,HZ1,302-O-292-HZ1       | 1348,305,OE2,119,HE22,305-OE2-119-HE22 |
| 1309,303,O,306,H,303-O-306-H           | 1349,305,OE2,309,HD21,305-OE2-309-HD21 |
| 1310,303,OG,306,HZ2,303-OG-306-HZ2     | 1350,305,OE2,263,HE22,305-OE2-263-HE22 |
| 1311,303,O,303,HG,303-O-303-HG         | 1351,305,OE1,309,HD22,305-OE1-309-HD22 |
| 1312,303,O,307,H,303-O-307-H           | 1352,305,OE1,303,HG,305-OE1-303-HG     |
| 1313,303,OG,306,H,303-OG-306-H         | 1353,305,OE2,306,HZ3,305-OE2-306-HZ3   |
| 1314,303,OG,305,H,303-OG-305-H         | 1354,305,OE1,117,HD22,305-OE1-117-HD22 |
| 1315,303,O,292,HZ3,303-O-292-HZ3       | 1355,305,OE2,117,HD22,305-OE2-117-HD22 |

|                                        |                                        |
|----------------------------------------|----------------------------------------|
| 1356,305,OE1,306,H,305-OE1-306-H       | 1396,313,OD1,122,H,313-OD1-122-H       |
| 1357,305,OE2,306,HZ1,305-OE2-306-HZ1   | 1397,313,O,317,H,313-O-317-H           |
| 1358,305,OE2,303,HG,305-OE2-303-HG     | 1398,313,OD2,120,HG,313-OD2-120-HG     |
| 1359,305,OE1,306,HZ1,305-OE1-306-HZ1   | 1399,313,O,316,H,313-O-316-H           |
| 1360,305,OE1,309,HD21,305-OE1-309-HD21 | 1400,314,O,317,H,314-O-317-H           |
| 1361,305,OE2,259,HH,305-OE2-259-HH     | 1401,314,O,318,H,314-O-318-H           |
| 1362,305,OE1,119,HE22,305-OE1-119-HE22 | 1402,315,O,319,H,315-O-319-H           |
| 1363,305,OE2,305,H,305-OE2-305-H       | 1403,316,O,320,H,316-O-320-H           |
| 1364,305,OE2,117,HD21,305-OE2-117-HD21 | 1404,317,O,320,H,317-O-320-H           |
| 1365,305,OE1,306,HZ3,305-OE1-306-HZ3   | 1405,317,O,321,HG1,317-O-321-HG1       |
| 1366,305,OE1,259,HH,305-OE1-259-HH     | 1406,317,O,321,H,317-O-321-H           |
| 1367,306,O,134,HE,306-O-134-HE         | 1407,318,O,323,HG1,318-O-323-HG1       |
| 1368,306,O,134,HH21,306-O-134-HH21     | 1408,318,O,322,H,318-O-322-H           |
| 1369,307,O,310,H,307-O-310-H           | 1409,318,O,321,H,318-O-321-H           |
| 1370,308,O,310,H,308-O-310-H           | 1410,318,O,321,HG1,318-O-321-HG1       |
| 1371,308,O,311,H,308-O-311-H           | 1411,319,O,323,H,319-O-323-H           |
| 1372,309,OD1,117,HD22,309-OD1-117-HD22 | 1412,319,O,323,HG1,319-O-323-HG1       |
| 1373,309,OD1,119,HE21,309-OD1-119-HE21 | 1413,320,OD2,187,HH,320-OD2-187-HH     |
| 1374,309,O,312,H,309-O-312-H           | 1414,320,OD1,499,HZ3,320-OD1-499-HZ3   |
| 1375,309,OD1,263,HE21,309-OD1-263-HE21 | 1415,320,O,324,HG1,320-O-324-HG1       |
| 1376,309,OD1,134,HH21,309-OD1-134-HH21 | 1416,320,OD1,499,HZ1,320-OD1-499-HZ1   |
| 1377,309,ND2,117,HD22,309-ND2-117-HD22 | 1417,320,OD2,222,HD22,320-OD2-222-HD22 |
| 1378,309,O,313,H,309-O-313-H           | 1418,320,OD1,187,HH,320-OD1-187-HH     |
| 1379,309,OD1,134,HH22,309-OD1-134-HH22 | 1419,320,OD1,497,HG1,320-OD1-497-HG1   |
| 1380,310,O,314,H,310-O-314-H           | 1420,320,O,324,H,320-O-324-H           |
| 1381,310,O,313,H,310-O-313-H           | 1421,320,OD2,499,HZ3,320-OD2-499-HZ3   |
| 1382,311,O,314,H,311-O-314-H           | 1422,320,OD2,499,HZ2,320-OD2-499-HZ2   |
| 1383,311,O,315,H,311-O-315-H           | 1423,320,OD2,324,HG1,320-OD2-324-HG1   |
| 1384,312,O,316,H,312-O-316-H           | 1424,320,OD1,222,HD22,320-OD1-222-HD22 |
| 1385,313,OD2,121,H,313-OD2-121-H       | 1425,320,OD2,499,HZ1,320-OD2-499-HZ1   |
| 1386,313,O,516,H10,313-O-516-H10       | 1426,320,OD1,499,HZ2,320-OD1-499-HZ2   |
| 1387,313,OD2,122,HG,313-OD2-122-HG     | 1427,320,OD1,324,HG1,320-OD1-324-HG1   |
| 1388,313,OD1,116,HG,313-OD1-116-HG     | 1428,320,OD2,497,HG1,320-OD2-497-HG1   |
| 1389,313,OD2,516,H10,313-OD2-516-H10   | 1429,321,O,325,H,321-O-325-H           |
| 1390,313,OD2,116,HG,313-OD2-116-HG     | 1430,321,O,324,H,321-O-324-H           |
| 1391,313,OD1,121,H,313-OD1-121-H       | 1431,321,OG1,322,H,321-OG1-322-H       |
| 1392,313,OD1,516,H10,313-OD1-516-H10   | 1432,322,O,326,H,322-O-326-H           |
| 1393,313,OD1,120,HG,313-OD1-120-HG     | 1433,323,O,327,H,323-O-327-H           |
| 1394,313,OD2,122,H,313-OD2-122-H       | 1434,323,O,327,HG,323-O-327-HG         |
| 1395,313,OD1,122,HG,313-OD1-122-HG     | 1435,324,OG1,499,HZ2,324-OG1-499-HZ2   |

1436,324,OG1,499,HZ1,324-OG1-499-HZ1  
1437,324,O,327,HG,324-O-327-HG  
1438,324,OG1,497,HG1,324-OG1-497-HG1  
1439,324,O,328,H,324-O-328-H  
1440,324,OG1,187,HH,324-OG1-187-HH  
1441,324,OG1,499,HZ3,324-OG1-499-HZ3  
1442,324,O,327,H,324-O-327-H  
1443,325,O,329,H,325-O-329-H  
1444,325,O,329,HG,325-O-329-HG  
1445,326,O,330,H,326-O-330-H  
1446,326,O,329,HG,326-O-329-HG  
1447,326,O,329,H,326-O-329-H  
1448,327,O,331,H,327-O-331-H  
1449,327,O,327,HG,327-O-327-HG  
1450,327,O,330,H,327-O-330-H  
1451,328,O,332,H,328-O-332-H  
1452,328,O,331,H,328-O-331-H  
1453,329,O,333,H,329-O-333-H  
1454,330,O,333,H,330-O-333-H  
1455,330,O,334,H,330-O-334-H  
1456,331,O,335,H,331-O-335-H  
1457,331,O,334,H,331-O-334-H  
1458,332,O,336,H,332-O-336-H  
1459,332,O,336,HD22,332-O-336-HD22  
1460,333,O,336,H,333-O-336-H  
1461,333,O,340,HE21,333-O-340-HE21  
1462,335,O,336,HD22,335-O-336-HD22  
1463,335,O,487,HZ1,335-O-487-HZ1  
1464,336,O,339,H,336-O-339-H  
1465,336,O,340,H,336-O-340-H  
1466,337,O,341,HH11,337-O-341-HH11  
1467,337,O,341,HE,337-O-341-HE  
1468,337,O,341,H,337-O-341-H  
1469,337,O,340,H,337-O-340-H  
1470,338,O,341,H,338-O-341-H  
1471,338,O,342,H,338-O-342-H  
1472,338,O,338,HH11,338-O-338-HH11  
1473,339,O,342,H,339-O-342-H  
1474,339,O,343,H,339-O-343-H  
1475,340,OE1,344,HE22,340-OE1-344-HE22  
1476,340,OE1,344,HE21,340-OE1-344-HE21  
1477,340,OE1,480,H,340-OE1-480-H  
1478,340,O,344,H,340-O-344-H  
1479,341,O,341,HH11,341-O-341-HH11  
1480,341,O,341,HE,341-O-341-HE  
1481,341,O,345,H,341-O-345-H  
1482,342,O,345,H,342-O-345-H  
1483,342,O,346,H,342-O-346-H  
1484,342,O,342,HZ1,342-O-342-HZ1  
1485,343,O,347,H,343-O-347-H  
1486,343,O,346,H,343-O-346-H  
1487,344,OE1,341,HH21,344-OE1-341-HH21  
1488,344,O,348,H,344-O-348-H  
1489,344,OE1,341,HE,344-OE1-341-HE  
1490,344,O,347,H,344-O-347-H  
1491,344,OE1,341,HH11,344-OE1-341-HH11  
1492,345,OE2,341,HE,345-OE2-341-HE  
1493,345,OE1,341,HH21,345-OE1-341-HH21  
1494,345,OE2,341,HH21,345-OE2-341-HH21  
1495,345,OE1,341,HE,345-OE1-341-HE  
1496,345,O,349,HG1,345-O-349-HG1  
1497,345,OE1,342,HZ1,345-OE1-342-HZ1  
1498,345,OE1,342,HZ3,345-OE1-342-HZ3  
1499,345,OE2,342,HZ2,345-OE2-342-HZ2  
1500,345,OE2,342,HZ3,345-OE2-342-HZ3  
1501,345,OE1,338,HH22,345-OE1-338-HH22  
1502,345,OE2,338,HH12,345-OE2-338-HH12  
1503,345,OE2,341,HH12,345-OE2-341-HH12  
1504,345,OE1,341,HH22,345-OE1-341-HH22  
1505,345,OE1,338,HH12,345-OE1-338-HH12  
1506,345,OE2,341,HH22,345-OE2-341-HH22  
1507,345,OE1,341,HH12,345-OE1-341-HH12  
1508,345,OE1,342,HZ2,345-OE1-342-HZ2  
1509,345,OE2,338,HH22,345-OE2-338-HH22  
1510,345,OE2,342,HZ1,345-OE2-342-HZ1  
1511,345,O,349,H,345-O-349-H  
1512,345,OE1,341,HH11,345-OE1-341-HH11  
1513,346,OE1,342,HZ1,346-OE1-342-HZ1  
1514,346,OE2,342,HZ2,346-OE2-342-HZ2  
1515,346,OE2,367,H,346-OE2-367-H



|                                        |                                        |
|----------------------------------------|----------------------------------------|
| 1516,346,OE1,349,HG1,346-OE1-349-HG1   | 1556,361,OD1,355,HH12,361-OD1-355-HH12 |
| 1517,346,OE1,342,HZ2,346-OE1-342-HZ2   | 1557,361,OD1,355,HH22,361-OD1-355-HH22 |
| 1518,346,OE1,367,H,346-OE1-367-H       | 1558,361,OD2,355,HH22,361-OD2-355-HH22 |
| 1519,346,OE2,342,HZ1,346-OE2-342-HZ1   | 1559,361,OD1,364,HE2,361-OD1-364-HE2   |
| 1520,346,OE2,342,HZ3,346-OE2-342-HZ3   | 1560,361,O,365,H,361-O-365-H           |
| 1521,346,O,349,H,346-O-349-H           | 1561,361,OD2,358,H,361-OD2-358-H       |
| 1522,346,OE1,342,HZ3,346-OE1-342-HZ3   | 1562,361,OD2,358,HH21,361-OD2-358-HH21 |
| 1523,346,O,350,H,346-O-350-H           | 1563,361,OD1,360,HG,361-OD1-360-HG     |
| 1524,347,O,352,H,347-O-352-H           | 1564,362,O,365,H,362-O-365-H           |
| 1525,347,O,351,H,347-O-351-H           | 1565,362,NH1,465,HE1,362-NH1-465-HE1   |
| 1526,347,O,350,H,347-O-350-H           | 1566,362,NH2,464,HH21,362-NH2-464-HH21 |
| 1527,348,OD2,353,HH21,348-OD2-353-HH21 | 1567,364,ND1,363,HG,364-ND1-363-HG     |
| 1528,348,OD1,511,HH12,348-OD1-511-HH12 | 1568,365,O,369,H,365-O-369-H           |
| 1529,348,OD1,511,HH22,348-OD1-511-HH22 | 1569,365,O,368,H,365-O-368-H           |
| 1530,348,OD2,511,HH22,348-OD2-511-HH22 | 1570,366,O,369,H,366-O-369-H           |
| 1531,348,OD2,511,HH12,348-OD2-511-HH12 | 1571,366,O,370,H,366-O-370-H           |
| 1532,348,OD2,353,HE,348-OD2-353-HE     | 1572,367,OH,342,HZ1,367-OH-342-HZ1     |
| 1533,348,OD1,353,HH21,348-OD1-353-HH21 | 1573,367,O,371,H,367-O-371-H           |
| 1534,348,OD1,353,HE,348-OD1-353-HE     | 1574,368,O,372,H,368-O-372-H           |
| 1535,350,O,355,HH21,350-O-355-HH21     | 1575,369,OE1,362,HH22,369-OE1-362-HH22 |
| 1536,351,O,354,HG,351-O-354-HG         | 1576,369,OE2,362,HH12,369-OE2-362-HH12 |
| 1537,352,O,476,HE21,352-O-476-HE21     | 1577,369,OE1,362,HE,369-OE1-362-HE     |
| 1538,353,O,476,HE22,353-O-476-HE22     | 1578,369,OE1,464,HH21,369-OE1-464-HH21 |
| 1539,354,OG,355,H,354-OG-355-H         | 1579,369,OE2,362,HH22,369-OE2-362-HH22 |
| 1540,355,O,476,HE22,355-O-476-HE22     | 1580,369,O,373,H,369-O-373-H           |
| 1541,356,O,355,HH11,356-O-355-HH11     | 1581,369,O,372,H,369-O-372-H           |
| 1542,357,O,356,HH11,357-O-356-HH11     | 1582,369,OE2,362,HH21,369-OE2-362-HH21 |
| 1543,358,O,361,H,358-O-361-H           | 1583,369,OE1,362,HH21,369-OE1-362-HH21 |
| 1544,359,O,362,H,359-O-362-H           | 1584,369,OE1,464,HE,369-OE1-464-HE     |
| 1545,359,O,362,HH11,359-O-362-HH11     | 1585,369,OE1,362,HH12,369-OE1-362-HH12 |
| 1546,360,OG,155,HG1,360-OG-155-HG1     | 1586,369,OE2,465,HE1,369-OE2-465-HE1   |
| 1547,360,OG,358,HH11,360-OG-358-HH11   | 1587,369,OE2,464,HH21,369-OE2-464-HH21 |
| 1548,360,O,363,H,360-O-363-H           | 1588,369,OE2,362,HE,369-OE2-362-HE     |
| 1549,360,OG,358,HE,360-OG-358-HE       | 1589,369,OE1,465,HE1,369-OE1-465-HE1   |
| 1550,360,O,363,HG,360-O-363-HG         | 1590,369,OE2,464,HE,369-OE2-464-HE     |
| 1551,361,OD1,358,HE,361-OD1-358-HE     | 1591,370,O,373,H,370-O-373-H           |
| 1552,361,OD1,358,HH21,361-OD1-358-HH21 | 1592,370,O,374,H,370-O-374-H           |
| 1553,361,OD2,355,HH12,361-OD2-355-HH12 | 1593,371,O,375,HG1,371-O-375-HG1       |
| 1554,361,OD2,358,HE,361-OD2-358-HE     | 1594,371,O,375,H,371-O-375-H           |
| 1555,361,O,364,H,361-O-364-H           | 1595,372,O,376,H,372-O-376-H           |

|                                        |                                        |
|----------------------------------------|----------------------------------------|
| 1596,373,O,377,H,373-O-377-H           | 1636,388,O,407,H,388-O-407-H           |
| 1597,374,OE2,431,HH12,374-OE2-431-HH12 | 1637,389,O,105,H,389-O-105-H           |
| 1598,374,OE1,431,HH22,374-OE1-431-HH22 | 1638,390,OG1,404,H,390-OG1-404-H       |
| 1599,374,OE2,431,HH11,374-OE2-431-HH11 | 1639,390,OG1,405,H,390-OG1-405-H       |
| 1600,374,OE2,377,HE,374-OE2-377-HE     | 1640,390,O,404,H,390-O-404-H           |
| 1601,374,OE2,431,HH22,374-OE2-431-HH22 | 1641,391,OG1,104,HZ1,391-OG1-104-HZ1   |
| 1602,374,OE1,428,H,374-OE1-428-H       | 1642,391,OG1,104,HZ2,391-OG1-104-HZ2   |
| 1603,374,OE2,377,HH21,374-OE2-377-HH21 | 1643,391,O,403,HZ3,391-O-403-HZ3       |
| 1604,374,OE1,431,HH11,374-OE1-431-HH11 | 1644,391,OG1,105,H,391-OG1-105-H       |
| 1605,374,OE1,377,HH21,374-OE1-377-HH21 | 1645,391,O,403,HZ2,391-O-403-HZ2       |
| 1606,374,OE2,428,H,374-OE2-428-H       | 1646,391,OG1,104,HZ3,391-OG1-104-HZ3   |
| 1607,374,OE1,377,HE,374-OE1-377-HE     | 1647,391,O,403,HZ1,391-O-403-HZ1       |
| 1608,374,OE1,431,HH12,374-OE1-431-HH12 | 1648,393,OD1,403,HZ3,393-OD1-403-HZ3   |
| 1609,374,O,378,H,374-O-378-H           | 1649,393,OD1,403,HZ1,393-OD1-403-HZ1   |
| 1610,375,O,379,HG,375-O-379-HG         | 1650,393,OD1,400,HH,393-OD1-400-HH     |
| 1611,375,O,379,H,375-O-379-H           | 1651,393,OD2,403,H,393-OD2-403-H       |
| 1612,375,OG1,329,HG,375-OG1-329-HG     | 1652,393,OD1,393,H,393-OD1-393-H       |
| 1613,376,O,380,H,376-O-380-H           | 1653,393,OD1,392,HH21,393-OD1-392-HH21 |
| 1614,377,O,416,HE2,377-O-416-HE2       | 1654,393,OD2,403,HZ3,393-OD2-403-HZ3   |
| 1615,377,O,380,HG,377-O-380-HG         | 1655,393,OD1,403,HZ2,393-OD1-403-HZ2   |
| 1616,378,ND1,377,HH22,378-ND1-377-HH22 | 1656,393,OD2,400,HH,393-OD2-400-HH     |
| 1617,378,O,416,HE2,378-O-416-HE2       | 1657,393,OD2,403,HZ1,393-OD2-403-HZ1   |
| 1618,378,ND1,332,HH,378-ND1-332-HH     | 1658,393,OD2,393,H,393-OD2-393-H       |
| 1619,379,OG,381,H,379-OG-381-H         | 1659,393,OD1,403,H,393-OD1-403-H       |
| 1620,380,OG,415,HD22,380-OG-415-HD22   | 1660,393,OD2,403,HZ2,393-OD2-403-HZ2   |
| 1621,380,O,380,HG,380-O-380-HG         | 1661,394,OG1,395,H,394-OG1-395-H       |
| 1622,380,O,382,H,380-O-382-H           | 1662,394,OG1,99,HE22,394-OG1-99-HE22   |
| 1623,381,O,497,HG1,381-O-497-HG1       | 1663,394,OG1,99,HE21,394-OG1-99-HE21   |
| 1624,381,O,498,H,381-O-498-H           | 1664,394,O,395,HG,394-O-395-HG         |
| 1625,382,O,411,HE21,382-O-411-HE21     | 1665,394,O,401,H,394-O-401-H           |
| 1626,383,O,412,H,383-O-412-H           | 1666,395,O,99,HE22,395-O-99-HE22       |
| 1627,383,O,411,H,383-O-411-H           | 1667,396,O,399,H,396-O-399-H           |
| 1628,385,OG1,409,H,385-OG1-409-H       | 1668,397,O,399,H,397-O-399-H           |
| 1629,385,O,230,HG,385-O-230-HG         | 1669,397,O,38,HZ3,397-O-38-HZ3         |
| 1630,386,O,106,HH12,386-O-106-HH12     | 1670,397,O,38,HZ2,397-O-38-HZ2         |
| 1631,386,O,106,HH11,386-O-106-HH11     | 1671,397,O,38,HZ1,397-O-38-HZ1         |
| 1632,386,O,385,HG1,386-O-385-HG1       | 1672,398,O,38,HZ3,398-O-38-HZ3         |
| 1633,387,O,106,HH11,387-O-106-HH11     | 1673,398,O,38,HZ2,398-O-38-HZ2         |
| 1634,388,NE2,385,HG1,388-NE2-385-HG1   | 1674,398,O,38,H,398-O-38-H             |
| 1635,388,O,389,HG,388-O-389-HG         | 1675,398,O,38,HZ1,398-O-38-HZ1         |

|                                        |                                        |
|----------------------------------------|----------------------------------------|
| 1676,399,O,396,H,399-O-396-H           | 1716,414,O,417,H,414-O-417-H           |
| 1677,399,O,395,HG,399-O-395-HG         | 1717,414,O,421,HE1,414-O-421-HE1       |
| 1678,400,O,39,HD22,400-O-39-HD22       | 1718,415,O,377,HH11,415-O-377-HH11     |
| 1679,401,O,394,H,401-O-394-H           | 1719,415,OD1,448,H,415-OD1-448-H       |
| 1680,402,O,405,H,402-O-405-H           | 1720,416,O,418,HE21,416-O-418-HE21     |
| 1681,402,O,390,HG1,402-O-390-HG1       | 1721,416,ND1,377,HH12,416-ND1-377-HH12 |
| 1682,403,O,405,H,403-O-405-H           | 1722,417,O,420,H,417-O-420-H           |
| 1683,403,O,405,HE,403-O-405-HE         | 1723,417,OD2,413,HE21,417-OD2-413-HE21 |
| 1684,403,O,405,HH11,403-O-405-HH11     | 1724,417,OD1,413,HE21,417-OD1-413-HE21 |
| 1685,404,O,405,HH11,404-O-405-HH11     | 1725,417,OD2,419,HZ2,417-OD2-419-HZ2   |
| 1686,404,O,389,HG,404-O-389-HG         | 1726,417,OD1,68,HE21,417-OD1-68-HE21   |
| 1687,405,O,390,H,405-O-390-H           | 1727,417,OD1,419,H,417-OD1-419-H       |
| 1688,405,O,389,HG,405-O-389-HG         | 1728,417,OD2,68,HE22,417-OD2-68-HE22   |
| 1689,406,O,84,H,406-O-84-H             | 1729,417,OD1,419,HZ3,417-OD1-419-HZ3   |
| 1690,407,O,388,H,407-O-388-H           | 1730,417,OD1,419,HZ2,417-OD1-419-HZ2   |
| 1691,408,O,86,H,408-O-86-H             | 1731,417,OD2,419,H,417-OD2-419-H       |
| 1692,409,O,385,H,409-O-385-H           | 1732,417,OD2,418,HE21,417-OD2-418-HE21 |
| 1693,409,O,411,H,409-O-411-H           | 1733,417,OD2,419,HZ3,417-OD2-419-HZ3   |
| 1694,410,O,413,H,410-O-413-H           | 1734,417,OD1,420,H,417-OD1-420-H       |
| 1695,410,OD1,413,H,410-OD1-413-H       | 1735,417,OD1,419,HZ1,417-OD1-419-HZ1   |
| 1696,410,OD1,412,H,410-OD1-412-H       | 1736,417,OD2,418,H,417-OD2-418-H       |
| 1697,410,OD1,411,H,410-OD1-411-H       | 1737,417,O,421,H,417-O-421-H           |
| 1698,410,O,87,HG,410-O-87-HG           | 1738,417,OD2,420,H,417-OD2-420-H       |
| 1699,411,O,415,H,411-O-415-H           | 1739,417,OD1,413,HE22,417-OD1-413-HE22 |
| 1700,411,O,414,H,411-O-414-H           | 1740,417,OD1,68,HE22,417-OD1-68-HE22   |
| 1701,411,O,415,HD22,411-O-415-HD22     | 1741,417,OD2,419,HZ1,417-OD2-419-HZ1   |
| 1702,411,OE1,451,H,411-OE1-451-H       | 1742,417,OD2,413,HE22,417-OD2-413-HE22 |
| 1703,412,O,415,H,412-O-415-H           | 1743,418,OE1,419,HZ3,418-OE1-419-HZ3   |
| 1704,412,O,416,H,412-O-416-H           | 1744,418,OE1,419,HZ2,418-OE1-419-HZ2   |
| 1705,413,NE2,68,HE22,413-NE2-68-HE22   | 1745,418,OE1,418,H,418-OE1-418-H       |
| 1706,413,NE2,87,HG,413-NE2-87-HG       | 1746,418,O,418,HE21,418-O-418-HE21     |
| 1707,413,OE1,67,HG,413-OE1-67-HG       | 1747,418,OE1,419,HZ1,418-OE1-419-HZ1   |
| 1708,413,OE1,68,HE21,413-OE1-68-HE21   | 1748,418,OE1,68,HE22,418-OE1-68-HE22   |
| 1709,413,O,416,H,413-O-416-H           | 1749,418,O,421,H,418-O-421-H           |
| 1710,413,NE2,68,HE21,413-NE2-68-HE21   | 1750,420,O,446,HZ2,420-O-446-HZ2       |
| 1711,413,OE1,68,HE22,413-OE1-68-HE22   | 1751,420,O,446,HZ1,420-O-446-HZ1       |
| 1712,413,OE1,87,HG,413-OE1-87-HG       | 1752,420,O,446,HZ3,420-O-446-HZ3       |
| 1713,413,O,417,H,413-O-417-H           | 1753,422,O,431,HE,422-O-431-HE         |
| 1714,413,O,413,HE21,413-O-413-HE21     | 1754,422,O,431,HH21,422-O-431-HH21     |
| 1715,413,OE1,410,HD22,413-OE1-410-HD22 | 1755,422,O,431,HH22,422-O-431-HH22     |

|                                        |                                      |
|----------------------------------------|--------------------------------------|
| 1756,423,O,431,HH22,423-O-431-HH22     | 1796,430,OE2,342,HZ1,430-OE2-342-HZ1 |
| 1757,423,OD1,425,HG,423-OD1-425-HG     | 1797,430,OE1,342,HZ1,430-OE1-342-HZ1 |
| 1758,423,OD1,418,HE22,423-OD1-418-HE22 | 1798,430,OE1,342,HZ2,430-OE1-342-HZ2 |
| 1759,423,O,431,HH21,423-O-431-HH21     | 1799,431,O,433,H,431-O-433-H         |
| 1760,423,O,423,HD22,423-O-423-HD22     | 1800,432,O,440,H,432-O-440-H         |
| 1761,423,O,426,H,423-O-426-H           | 1801,434,OG1,438,H,434-OG1-438-H     |
| 1762,423,OD1,431,HH21,423-OD1-431-HH21 | 1802,434,OG1,437,H,434-OG1-437-H     |
| 1763,424,O,377,HH22,424-O-377-HH22     | 1803,434,OG1,436,H,434-OG1-436-H     |
| 1764,424,O,426,H,424-O-426-H           | 1804,434,O,437,H,434-O-437-H         |
| 1765,424,O,377,HH12,424-O-377-HH12     | 1805,435,O,437,H,435-O-437-H         |
| 1766,425,O,378,HE2,425-O-378-HE2       | 1806,436,OD2,438,H,436-OD2-438-H     |
| 1767,425,O,425,HG,425-O-425-HG         | 1807,436,OD2,436,H,436-OD2-436-H     |
| 1768,426,O,431,HH22,426-O-431-HH22     | 1808,436,OD1,434,HG1,436-OD1-434-HG1 |
| 1769,426,OE2,425,HG,426-OE2-425-HG     | 1809,436,OD1,436,H,436-OD1-436-H     |
| 1770,426,OE1,427,H,426-OE1-427-H       | 1810,436,O,438,H,436-O-438-H         |
| 1771,426,OE1,425,HG,426-OE1-425-HG     | 1811,436,OD1,438,H,436-OD1-438-H     |
| 1772,426,OE1,423,HD22,426-OE1-423-HD22 | 1812,436,OD2,434,HG1,436-OD2-434-HG1 |
| 1773,426,OE2,423,HD22,426-OE2-423-HD22 | 1813,438,O,434,HG1,438-O-434-HG1     |
| 1774,426,OE2,427,H,426-OE2-427-H       | 1814,438,O,434,H,438-O-434-H         |
| 1775,426,OE1,423,HD21,426-OE1-423-HD21 | 1815,439,O,441,HZ1,439-O-441-HZ1     |
| 1776,426,OE2,423,HD21,426-OE2-423-HD21 | 1816,439,O,441,H,439-O-441-H         |
| 1777,426,O,431,HH12,426-O-431-HH12     | 1817,439,O,441,HZ3,439-O-441-HZ3     |
| 1778,427,O,338,HH21,427-O-338-HH21     | 1818,439,O,441,HZ2,439-O-441-HZ2     |
| 1779,428,O,431,H,428-O-431-H           | 1819,440,OD1,442,H,440-OD1-442-H     |
| 1780,428,O,431,HH11,428-O-431-HH11     | 1820,440,O,443,H,440-O-443-H         |
| 1781,429,O,432,H,429-O-432-H           | 1821,440,OD2,442,H,440-OD2-442-H     |
| 1782,429,O,433,H,429-O-433-H           | 1822,440,O,442,H,440-O-442-H         |
| 1783,430,OE2,338,HH22,430-OE2-338-HH22 | 1823,440,O,444,H,440-O-444-H         |
| 1784,430,OE2,430,H,430-OE2-430-H       | 1824,440,O,444,HG,440-O-444-HG       |
| 1785,430,OE2,338,HH12,430-OE2-338-HH12 | 1825,440,OD2,443,H,440-OD2-443-H     |
| 1786,430,OE1,338,HH12,430-OE1-338-HH12 | 1826,440,OD1,443,H,440-OD1-443-H     |
| 1787,430,OE1,338,HH21,430-OE1-338-HH21 | 1827,441,O,445,H,441-O-445-H         |
| 1788,430,OE2,342,HZ2,430-OE2-342-HZ2   | 1828,441,O,441,HZ3,441-O-441-HZ3     |
| 1789,430,OE1,338,HH22,430-OE1-338-HH22 | 1829,441,O,444,HG,441-O-444-HG       |
| 1790,430,OE2,342,HZ3,430-OE2-342-HZ3   | 1830,442,O,446,HZ1,442-O-446-HZ1     |
| 1791,430,OE1,367,HH,430-OE1-367-HH     | 1831,442,O,446,HZ3,442-O-446-HZ3     |
| 1792,430,OE1,342,HZ3,430-OE1-342-HZ3   | 1832,442,O,446,HZ2,442-O-446-HZ2     |
| 1793,430,OE1,430,H,430-OE1-430-H       | 1833,442,O,446,H,442-O-446-H         |
| 1794,430,O,433,H,430-O-433-H           | 1834,442,O,445,H,442-O-445-H         |
| 1795,430,OE2,367,HH,430-OE2-367-HH     | 1835,443,O,446,H,443-O-446-H         |

1836,443,O,447,H,443-O-447-H  
1837,444,OG,464,HH22,444-OG-464-HH22  
1838,444,O,464,HH22,444-O-464-HH22  
1839,444,OG,464,HH12,444-OG-464-HH12  
1840,444,O,447,H,444-O-447-H  
1841,444,O,444,HG,444-O-444-HG  
1842,445,OE2,444,HG,445-OE2-444-HG  
1843,445,OE2,93,HH21,445-OE2-93-HH21  
1844,445,OE1,446,HZ1,445-OE1-446-HZ1  
1845,445,OE1,464,HH22,445-OE1-464-HH22  
1846,445,OE1,444,HG,445-OE1-444-HG  
1847,445,OE1,93,HH21,445-OE1-93-HH21  
1848,445,OE1,441,HZ2,445-OE1-441-HZ2  
1849,445,OE2,464,HH22,445-OE2-464-HH22  
1850,445,OE1,441,HZ3,445-OE1-441-HZ3  
1851,445,OE2,446,HZ2,445-OE2-446-HZ2  
1852,445,OE2,464,HH12,445-OE2-464-HH12  
1853,445,OE1,456,HZ2,445-OE1-456-HZ2  
1854,445,OE1,456,HZ3,445-OE1-456-HZ3  
1855,445,OE2,446,HZ3,445-OE2-446-HZ3  
1856,445,OE2,456,HZ2,445-OE2-456-HZ2  
1857,445,OE1,456,HZ1,445-OE1-456-HZ1  
1858,445,OE2,456,HZ3,445-OE2-456-HZ3  
1859,445,OE1,93,HH12,445-OE1-93-HH12  
1860,445,OE1,93,HH22,445-OE1-93-HH22  
1861,445,OE1,464,HH12,445-OE1-464-HH12  
1862,445,OE2,441,HZ1,445-OE2-441-HZ1  
1863,445,OE2,441,HZ3,445-OE2-441-HZ3  
1864,445,OE2,93,HH12,445-OE2-93-HH12  
1865,445,OE2,93,HH22,445-OE2-93-HH22  
1866,445,OE2,446,HZ1,445-OE2-446-HZ1  
1867,445,OE2,441,HZ2,445-OE2-441-HZ2  
1868,445,OE2,456,HZ1,445-OE2-456-HZ1  
1869,445,O,93,HH22,445-O-93-HH22  
1870,445,O,93,HH21,445-O-93-HH21  
1871,446,O,448,H,446-O-448-H  
1872,447,O,449,H,447-O-449-H  
1873,448,O,415,HD21,448-O-415-HD21  
1874,449,O,411,HE22,449-O-411-HE22  
1875,450,O,457,H,450-O-457-H  
1876,451,O,456,HZ1,451-O-456-HZ1  
1877,451,O,456,HZ3,451-O-456-HZ3  
1878,451,O,456,HZ2,451-O-456-HZ2  
1879,452,O,455,H,452-O-455-H  
1880,452,O,456,H,452-O-456-H  
1881,453,O,456,H,453-O-456-H  
1882,453,O,455,H,453-O-455-H  
1883,454,O,135,HH21,454-O-135-HH21  
1884,454,O,456,H,454-O-456-H  
1885,454,O,135,HH12,454-O-135-HH12  
1886,455,O,452,H,455-O-452-H  
1887,455,O,135,HH12,455-O-135-HH12  
1888,456,O,135,HH22,456-O-135-HH22  
1889,456,O,135,HH12,456-O-135-HH12  
1890,457,O,135,HH22,457-O-135-HH22  
1891,457,O,456,HZ2,457-O-456-HZ2  
1892,457,O,460,H,457-O-460-H  
1893,458,O,460,H,458-O-460-H  
1894,458,O,139,HE21,458-O-139-HE21  
1895,458,O,139,HE22,458-O-139-HE22  
1896,459,O,463,H,459-O-463-H  
1897,459,O,462,H,459-O-462-H  
1898,459,O,461,H,459-O-461-H  
1899,460,OE2,464,HH21,460-OE2-464-HH21  
1900,460,OE1,461,HG1,460-OE1-461-HG1  
1901,460,OE2,461,HG1,460-OE2-461-HG1  
1902,460,OE2,456,HZ3,460-OE2-456-HZ3  
1903,460,OE2,456,HZ2,460-OE2-456-HZ2  
1904,460,OE1,461,H,460-OE1-461-H  
1905,460,O,464,HE,460-O-464-HE  
1906,460,OE2,456,HZ1,460-OE2-456-HZ1  
1907,460,OE1,464,HH21,460-OE1-464-HH21  
1908,460,OE2,464,HH12,460-OE2-464-HH12  
1909,460,O,464,H,460-O-464-H  
1910,460,O,464,HH11,460-O-464-HH11  
1911,460,OE1,464,HH22,460-OE1-464-HH22  
1912,460,OE1,456,HZ3,460-OE1-456-HZ3  
1913,460,OE2,461,H,460-OE2-461-H  
1914,460,OE2,464,HH22,460-OE2-464-HH22  
1915,460,O,464,HH21,460-O-464-HH21

|                                        |                                        |
|----------------------------------------|----------------------------------------|
| 1916,460,OE1,143,HZ3,460-OE1-143-HZ3   | 1956,475,O,511,HH21,475-O-511-HH21     |
| 1917,460,O,464,HH12,460-O-464-HH12     | 1957,476,O,511,HE,476-O-511-HE         |
| 1918,460,OE1,456,HZ2,460-OE1-456-HZ2   | 1958,476,OE1,477,HH22,476-OE1-477-HH22 |
| 1919,460,OE1,464,HH12,460-OE1-464-HH12 | 1959,476,O,353,HH21,476-O-353-HH21     |
| 1920,460,OE1,456,HZ1,460-OE1-456-HZ1   | 1960,476,O,511,HH21,476-O-511-HH21     |
| 1921,460,OE2,143,HZ2,460-OE2-143-HZ2   | 1961,476,OE1,477,HH21,476-OE1-477-HH21 |
| 1922,460,OE1,464,HH11,460-OE1-464-HH11 | 1962,476,O,353,HE,476-O-353-HE         |
| 1923,461,O,464,H,461-O-464-H           | 1963,476,OE1,477,HE,476-OE1-477-HE     |
| 1924,461,O,464,HE,461-O-464-HE         | 1964,476,OE1,477,HH12,476-OE1-477-HH12 |
| 1925,461,O,465,H,461-O-465-H           | 1965,477,O,511,H,477-O-511-H           |
| 1926,461,OG1,143,HZ1,461-OG1-143-HZ1   | 1966,478,O,344,HE21,478-O-344-HE21     |
| 1927,461,OG1,464,HH21,461-OG1-464-HH21 | 1967,478,O,344,HE22,478-O-344-HE22     |
| 1928,461,OG1,143,HZ3,461-OG1-143-HZ3   | 1968,479,OE2,512,HG,479-OE2-512-HG     |
| 1929,462,O,464,H,462-O-464-H           | 1969,479,OE1,341,HH11,479-OE1-341-HH11 |
| 1930,462,O,465,H,462-O-465-H           | 1970,479,OE1,512,HG,479-OE1-512-HG     |
| 1931,462,O,466,H,462-O-466-H           | 1971,479,OE1,512,H,479-OE1-512-H       |
| 1932,463,O,467,H,463-O-467-H           | 1972,479,OE1,341,HE,479-OE1-341-HE     |
| 1933,464,O,468,H,464-O-468-H           | 1973,479,OE2,509,HE21,479-OE2-509-HE21 |
| 1934,464,NH2,465,HE1,464-NH2-465-HE1   | 1974,479,OE1,509,HE21,479-OE1-509-HE21 |
| 1935,465,O,468,H,465-O-468-H           | 1975,479,OE2,341,HH11,479-OE2-341-HH11 |
| 1936,465,O,469,H,465-O-469-H           | 1976,479,O,509,H,479-O-509-H           |
| 1937,466,O,469,H,466-O-469-H           | 1977,479,OE2,512,H,479-OE2-512-H       |
| 1938,466,O,470,H,466-O-470-H           | 1978,479,OE1,341,HH21,479-OE1-341-HH21 |
| 1939,467,O,471,H,467-O-471-H           | 1979,479,OE2,341,HH21,479-OE2-341-HH21 |
| 1940,468,O,472,H,468-O-472-H           | 1980,479,OE2,344,HE22,479-OE2-344-HE22 |
| 1941,469,O,473,H,469-O-473-H           | 1981,479,OE2,341,HH12,479-OE2-341-HH12 |
| 1942,470,O,473,H,470-O-473-H           | 1982,479,OE1,341,HH22,479-OE1-341-HH22 |
| 1943,470,O,474,H,470-O-474-H           | 1983,479,OE2,341,HH22,479-OE2-341-HH22 |
| 1944,471,O,475,H,471-O-475-H           | 1984,479,OE1,341,HH12,479-OE1-341-HH12 |
| 1945,471,O,474,H,471-O-474-H           | 1985,480,O,340,HE22,480-O-340-HE22     |
| 1946,472,O,476,H,472-O-476-H           | 1986,481,O,507,H,481-O-507-H           |
| 1947,473,O,477,H,473-O-477-H           | 1987,481,O,507,HE21,481-O-507-HE21     |
| 1948,473,O,477,HH11,473-O-477-HH11     | 1988,481,OG,509,HE22,481-OG-509-HE22   |
| 1949,473,O,477,HE,473-O-477-HE         | 1989,481,OG,507,HE21,481-OG-507-HE21   |
| 1950,473,O,477,HH21,473-O-477-HH21     | 1990,481,OG,482,H,481-OG-482-H         |
| 1951,473,O,476,H,473-O-476-H           | 1991,482,O,487,HZ3,482-O-487-HZ3       |
| 1952,474,O,477,H,474-O-477-H           | 1992,482,O,481,HG,482-O-481-HG         |
| 1953,474,O,478,H,474-O-478-H           | 1993,482,O,507,HE21,482-O-507-HE21     |
| 1954,475,O,344,HE21,475-O-344-HE21     | 1994,483,O,486,H,483-O-486-H           |
| 1955,475,O,511,HE,475-O-511-HE         | 1995,484,O,487,HZ3,484-O-487-HZ3       |

|                                      |                                        |
|--------------------------------------|----------------------------------------|
| 1996,484,O,487,HZ2,484-O-487-HZ2     | 2036,498,O,328,HE1,498-O-328-HE1       |
| 1997,484,O,487,HZ1,484-O-487-HZ1     | 2037,499,O,493,H,499-O-493-H           |
| 1998,484,O,486,H,484-O-486-H         | 2038,500,NE2,327,HG,500-NE2-327-HG     |
| 1999,485,O,487,HZ3,485-O-487-HZ3     | 2039,500,O,500,HD1,500-O-500-HD1       |
| 2000,485,O,487,H,485-O-487-H         | 2040,500,O,502,H,500-O-502-H           |
| 2001,485,O,487,HZ1,485-O-487-HZ1     | 2041,501,O,500,HD1,501-O-500-HD1       |
| 2002,485,O,487,HZ2,485-O-487-HZ2     | 2042,501,O,185,HD21,501-O-185-HD21     |
| 2003,486,O,488,H,486-O-488-H         | 2043,501,O,503,H,501-O-503-H           |
| 2004,486,O,505,HE2,486-O-505-HE2     | 2044,502,O,185,HD22,502-O-185-HD22     |
| 2005,487,O,505,HE2,487-O-505-HE2     | 2045,502,O,505,HE2,502-O-505-HE2       |
| 2006,487,O,489,H,487-O-489-H         | 2046,502,O,504,H,502-O-504-H           |
| 2007,488,O,487,HZ1,488-O-487-HZ1     | 2047,503,O,185,HD22,503-O-185-HD22     |
| 2008,488,O,490,H,488-O-490-H         | 2048,503,O,505,H,503-O-505-H           |
| 2009,488,O,487,HZ3,488-O-487-HZ3     | 2049,504,OE2,188,HE,504-OE2-188-HE     |
| 2010,488,O,487,HZ2,488-O-487-HZ2     | 2050,504,OE2,188,HH22,504-OE2-188-HH22 |
| 2011,489,OD1,491,HG1,489-OD1-491-HG1 | 2051,504,OE1,185,HD22,504-OE1-185-HD22 |
| 2012,489,O,491,H,489-O-491-H         | 2052,504,OE1,185,H,504-OE1-185-H       |
| 2013,489,OD1,491,H,489-OD1-491-H     | 2053,504,OE1,188,HH21,504-OE1-188-HH21 |
| 2014,489,OD2,491,HG1,489-OD2-491-HG1 | 2054,504,O,506,H,504-O-506-H           |
| 2015,489,OD2,491,H,489-OD2-491-H     | 2055,504,OE2,185,H,504-OE2-185-H       |
| 2016,489,OD1,490,H,489-OD1-490-H     | 2056,504,OE1,504,H,504-OE1-504-H       |
| 2017,489,OD1,487,HZ1,489-OD1-487-HZ1 | 2057,504,OE1,188,HH12,504-OE1-188-HH12 |
| 2018,489,O,500,HD1,489-O-500-HD1     | 2058,504,OE1,188,HH11,504-OE1-188-HH11 |
| 2019,489,OD2,490,H,489-OD2-490-H     | 2059,504,OE2,188,HH11,504-OE2-188-HH11 |
| 2020,489,OD1,487,HZ2,489-OD1-487-HZ2 | 2060,504,OE1,188,HE,504-OE1-188-HE     |
| 2021,489,O,501,H,489-O-501-H         | 2061,504,OE2,185,HD22,504-OE2-185-HD22 |
| 2022,490,O,501,H,490-O-501-H         | 2062,504,OE2,188,HH12,504-OE2-188-HH12 |
| 2023,491,O,501,H,491-O-501-H         | 2063,504,OE1,505,HE2,504-OE1-505-HE2   |
| 2024,492,O,58,HD21,492-O-58-HD21     | 2064,504,OE1,188,HH22,504-OE1-188-HH22 |
| 2025,493,O,499,H,493-O-499-H         | 2065,504,OE2,504,H,504-OE2-504-H       |
| 2026,494,OH,230,HG,494-OH-230-HG     | 2066,504,OE2,188,HH21,504-OE2-188-HH21 |
| 2027,494,OH,230,H,494-OH-230-H       | 2067,505,ND1,504,H,505-ND1-504-H       |
| 2028,494,OH,231,H,494-OH-231-H       | 2068,505,ND1,505,H,505-ND1-505-H       |
| 2029,496,O,497,HG1,496-O-497-HG1     | 2069,505,ND1,489,H,505-ND1-489-H       |
| 2030,497,OG1,499,HZ3,497-OG1-499-HZ3 | 2070,506,O,184,H,506-O-184-H           |
| 2031,497,O,499,HZ2,497-O-499-HZ2     | 2071,507,OE1,509,HE21,507-OE1-509-HE21 |
| 2032,497,O,499,HZ1,497-O-499-HZ1     | 2072,507,OE1,509,HE22,507-OE1-509-HE22 |
| 2033,497,O,499,HZ3,497-O-499-HZ3     | 2073,507,O,481,H,507-O-481-H           |
| 2034,497,OG1,499,HZ1,497-OG1-499-HZ1 | 2074,507,OE1,481,HG,507-OE1-481-HG     |
| 2035,497,OG1,499,HZ2,497-OG1-499-HZ2 | 2075,507,OE1,183,HE2,507-OE1-183-HE2   |

|                                                         |                                   |
|---------------------------------------------------------|-----------------------------------|
| 2076,507,O,509,HE22,507-O-509-HE22                      | 6,39,OD1,39,H,39-OD1-39-H         |
| 2077,508,O,509,HE21,508-O-509-HE21                      | 7,39,O,39,HD22,39-O-39-HD22       |
| 2078,509,OE1,481,HG,509-OE1-481-HG                      | 8,39,OD1,405,HH21,39-OD1-405-HH21 |
| 2079,509,OE1,510,H,509-OE1-510-H                        | 9,39,OD1,75,HE22,39-OD1-75-HE22   |
| 2080,509,O,479,H,509-O-479-H                            | 10,40,O,75,HE21,40-O-75-HE21      |
| 2081,509,OE1,507,HE21,509-OE1-507-HE21                  | 11,40,O,39,HD22,40-O-39-HD22      |
| 2082,509,OE1,175,HE22,509-OE1-175-HE22                  | 12,41,O,75,H,41-O-75-H            |
| 2083,510,O,509,HE21,510-O-509-HE21                      | 13,43,O,51,HE2,43-O-51-HE2        |
| 2084,511,O,353,HH12,511-O-353-HH12                      | 14,44,O,51,HE2,44-O-51-HE2        |
| 2085,512,O,512,HG,512-O-512-HG                          | 15,45,O,77,HH22,45-O-77-HH22      |
| 2086,512,O,353,HH22,512-O-353-HH22                      | 16,45,O,77,HE,45-O-77-HE          |
| 2087,512,OXT,353,HH12,512-OXT-353-HH12                  | 17,45,O,77,HH12,45-O-77-HH12      |
| 2088,512,OXT,353,HH22,512-OXT-353-HH22                  | 18,45,O,77,HH11,45-O-77-HH11      |
| 2089,512,OXT,353,HH11,512-OXT-353-HH11                  | 19,45,O,77,HH21,45-O-77-HH21      |
| 2090,512,OXT,512,HG,512-OXT-512-HG                      | 20,46,O,49,H,46-O-49-H            |
| 2091,512,O,353,HH12,512-O-353-HH12                      | 21,46,O,77,HH22,46-O-77-HH22      |
| 2092,513,O,516,H17,513-O-516-H17                        | 22,46,O,48,H,46-O-48-H            |
| 2093,515,O1A,106,HH22,515-O1A-106-HH22                  | 23,46,O,50,H,46-O-50-H            |
| 2094,515,O2D,106,HH21,515-O2D-106-HH21                  | 24,46,O,77,HH12,46-O-77-HH12      |
| 2095,515,O2A,452,H,515-O2A-452-H                        | 25,47,O,77,HH11,47-O-77-HH11      |
| 2096,515,O1D,455,HH11,515-O1D-455-HH11                  | 26,47,O,77,HE,47-O-77-HE          |
| 2097,515,O1D,131,HE1,515-O1D-131-HE1                    | 27,47,O,77,HH12,47-O-77-HH12      |
| 2098,515,O2D,455,HH11,515-O2D-455-HH11                  | 28,47,O,77,HH22,47-O-77-HH22      |
| 2099,515,O2D,131,HE1,515-O2D-131-HE1                    | 29,47,O,77,HH21,47-O-77-HH21      |
| 2100,515,O2A,106,HH12,515-O2A-106-HH12                  | 30,47,O,80,HG,47-O-80-HG          |
| 2101,515,O2D,135,HH11,515-O2D-135-HH11                  | 31,49,O,52,H,49-O-52-H            |
| 2102,515,O1D,106,HH21,515-O1D-106-HH21                  | 32,49,O,79,H,49-O-79-H            |
| 2103,515,O1D,135,HH11,515-O1D-135-HH11                  | 33,50,O,52,H,50-O-52-H            |
| 2104,515,O2A,106,HH22,515-O2A-106-HH22                  | 34,50,O,46,H,50-O-46-H            |
| 2105,515,O1A,386,H,515-O1A-386-H                        | 35,51,ND1,51,H,51-ND1-51-H        |
| 2106,515,O1A,106,HH12,515-O1A-106-HH12                  | 36,51,O,55,H,51-O-55-H            |
| 2107,516,O15,497,HG1,516-O15-497-HG1                    | 37,51,O,54,H,51-O-54-H            |
|                                                         | 38,51,ND1,77,H,51-ND1-77-H        |
|                                                         | 39,51,O,54,HG1,51-O-54-HG1        |
|                                                         | 40,52,O,56,H,52-O-56-H            |
|                                                         | 41,52,O,55,H,52-O-55-H            |
|                                                         | 42,53,O,56,H,53-O-56-H            |
|                                                         | 43,54,O,65,HH22,54-O-65-HH22      |
|                                                         | 44,54,OG1,46,HE1,54-OG1-46-HE1    |
|                                                         | 45,54,O,56,H,54-O-56-H            |
| <b>Model II</b>                                         |                                   |
| RES_DONOR,ATOM_DONOR,RES_ACCEPTOR,ATOM_ACCEPTOR,<br>TAG |                                   |
| 1,37,O,39,HD22,37-O-39-HD22                             |                                   |
| 2,37,O,39,H,37-O-39-H                                   |                                   |
| 3,38,O,400,H,38-O-400-H                                 |                                   |
| 4,39,O,38,HZ3,39-O-38-HZ3                               |                                   |
| 5,39,OD1,38,HZ2,39-OD1-38-HZ2                           |                                   |



|                                  |                                     |
|----------------------------------|-------------------------------------|
| 46,55,O,57,H,55-O-57-H           | 86,67,O,70,H,67-O-70-H              |
| 47,55,O,58,H,55-O-58-H           | 87,67,O,69,H,67-O-69-H              |
| 48,57,O,57,HZ1,57-O-57-HZ1       | 88,67,O,71,H,67-O-71-H              |
| 49,57,O,57,HZ2,57-O-57-HZ2       | 89,67,OG,410,HD22,67-OG-410-HD22    |
| 50,57,O,58,HD22,57-O-58-HD22     | 90,67,OG,87,HG,67-OG-87-HG          |
| 51,58,O,61,H,58-O-61-H           | 91,67,OG,413,HE21,67-OG-413-HE21    |
| 52,58,OD1,57,HZ2,58-OD1-57-HZ2   | 92,68,OE1,418,HE22,68-OE1-418-HE22  |
| 53,58,O,62,H,58-O-62-H           | 93,68,OE1,413,HE22,68-OE1-413-HE22  |
| 54,59,O,63,H,59-O-63-H           | 94,68,OE1,65,HH11,68-OE1-65-HH11    |
| 55,60,ND1,60,H,60-ND1-60-H       | 95,68,OE1,419,HZ3,68-OE1-419-HZ3    |
| 56,60,O,410,HD21,60-O-410-HD21   | 96,68,NE2,413,HE22,68-NE2-413-HE22  |
| 57,60,O,64,HG,60-O-64-HG         | 97,68,OE1,65,HE,68-OE1-65-HE        |
| 58,60,O,64,H,60-O-64-H           | 98,68,OE1,65,HH21,68-OE1-65-HH21    |
| 59,60,ND1,61,H,60-ND1-61-H       | 99,68,OE1,419,HZ1,68-OE1-419-HZ1    |
| 60,61,O,64,H,61-O-64-H           | 100,68,OE1,419,HZ2,68-OE1-419-HZ2   |
| 61,61,O,65,H,61-O-65-H           | 101,68,OE1,413,HE21,68-OE1-413-HE21 |
| 62,61,O,65,HH11,61-O-65-HH11     | 102,69,OE1,65,HH22,69-OE1-65-HH22   |
| 63,62,O,66,H,62-O-66-H           | 103,69,OE1,70,HH,69-OE1-70-HH       |
| 64,62,O,65,H,62-O-65-H           | 104,69,OE1,65,HH12,69-OE1-65-HH12   |
| 65,63,O,66,H,63-O-66-H           | 105,69,O,69,HE21,69-O-69-HE21       |
| 66,63,O,413,HE22,63-O-413-HE22   | 106,69,OE1,65,HH21,69-OE1-65-HH21   |
| 67,63,O,67,HG,63-O-67-HG         | 107,70,OH,69,HE21,70-OH-69-HE21     |
| 68,63,O,67,H,63-O-67-H           | 108,71,O,67,HG,71-O-67-HG           |
| 69,64,OG,410,HD21,64-OG-410-HD21 | 109,71,O,87,HG,71-O-87-HG           |
| 70,64,O,67,HG,64-O-67-HG         | 110,72,OD2,72,H,72-OD2-72-H         |
| 71,64,O,413,HE22,64-O-413-HE22   | 111,72,OD1,397,HZ1,72-OD1-397-HZ1   |
| 72,64,O,68,H,64-O-68-H           | 112,72,OD2,397,HZ2,72-OD2-397-HZ2   |
| 73,64,O,68,HE21,64-O-68-HE21     | 113,72,OD1,397,HZ2,72-OD1-397-HZ2   |
| 74,64,O,67,H,64-O-67-H           | 114,72,O,87,H,72-O-87-H             |
| 75,64,OG,65,HH21,64-OG-65-HH21   | 115,72,OD1,397,HZ3,72-OD1-397-HZ3   |
| 76,65,O,69,HE21,65-O-69-HE21     | 116,72,OD1,72,H,72-OD1-72-H         |
| 77,65,O,69,H,65-O-69-H           | 117,72,O,88,H,72-O-88-H             |
| 78,65,O,69,HE22,65-O-69-HE22     | 118,72,OD2,397,HZ3,72-OD2-397-HZ3   |
| 79,65,O,65,HH11,65-O-65-HH11     | 119,72,OD2,91,HG1,72-OD2-91-HG1     |
| 80,65,O,68,H,65-O-68-H           | 120,72,OD2,397,HZ1,72-OD2-397-HZ1   |
| 81,66,O,69,HE21,66-O-69-HE21     | 121,72,OD1,91,HG1,72-OD1-91-HG1     |
| 82,66,O,70,H,66-O-70-H           | 122,74,O,85,H,74-O-85-H             |
| 83,66,O,69,H,66-O-69-H           | 123,75,NE2,39,HD22,75-NE2-39-HD22   |
| 84,67,OG,68,HE21,67-OG-68-HE21   | 124,75,OE1,405,HE,75-OE1-405-HE     |
| 85,67,OG,413,HE22,67-OG-413-HE22 | 125,75,OE1,405,HH21,75-OE1-405-HH21 |

|                                     |                                   |
|-------------------------------------|-----------------------------------|
| 126,75,OE1,39,HD22,75-OE1-39-HD22   | 166,90,OD2,93,HH22,90-OD2-93-HH22 |
| 127,75,OE1,405,HH11,75-OE1-405-HH11 | 167,90,O,94,H,90-O-94-H           |
| 128,75,OE1,39,HD21,75-OE1-39-HD21   | 168,90,OD2,93,HH11,90-OD2-93-HH11 |
| 129,75,OE1,77,HE,75-OE1-77-HE       | 169,90,O,94,HE21,90-O-94-HE21     |
| 130,76,O,75,HE21,76-O-75-HE21       | 170,90,OD1,94,HE21,90-OD1-94-HE21 |
| 131,76,O,83,H,76-O-83-H             | 171,90,OD2,98,HH12,90-OD2-98-HH12 |
| 132,77,O,51,H,77-O-51-H             | 172,90,OD1,93,HH11,90-OD1-93-HH11 |
| 133,78,O,81,H,78-O-81-H             | 173,90,OD1,397,HZ2,90-OD1-397-HZ2 |
| 134,78,O,81,HG1,78-O-81-HG1         | 174,90,OD1,91,HG1,90-OD1-91-HG1   |
| 135,79,O,77,HH21,79-O-77-HH21       | 175,90,OD1,91,H,90-OD1-91-H       |
| 136,79,O,77,HE,79-O-77-HE           | 176,90,OD2,397,HZ2,90-OD2-397-HZ2 |
| 137,79,O,77,HH11,79-O-77-HH11       | 177,90,OD1,397,HZ3,90-OD1-397-HZ3 |
| 138,80,O,77,HH12,80-O-77-HH12       | 178,90,OD2,91,HG1,90-OD2-91-HG1   |
| 139,80,O,77,HH11,80-O-77-HH11       | 179,90,OD2,91,H,90-OD2-91-H       |
| 140,80,O,77,HE,80-O-77-HE           | 180,90,OD1,98,HH22,90-OD1-98-HH22 |
| 141,80,O,80,HG,80-O-80-HG           | 181,90,OD2,94,HE21,90-OD2-94-HE21 |
| 142,80,O,77,HH21,80-O-77-HH21       | 182,90,OD2,397,HZ3,90-OD2-397-HZ3 |
| 143,80,OG,81,HG1,80-OG-81-HG1       | 183,90,OD2,98,HH22,90-OD2-98-HH22 |
| 144,81,O,81,HG1,81-O-81-HG1         | 184,90,OD1,397,HZ1,90-OD1-397-HZ1 |
| 145,81,OG1,405,HH12,81-OG1-405-HH12 | 185,90,OD1,93,HH21,90-OD1-93-HH21 |
| 146,81,O,78,H,81-O-78-H             | 186,90,OD2,93,HH21,90-OD2-93-HH21 |
| 147,82,O,405,HE,82-O-405-HE         | 187,90,OD2,93,HE,90-OD2-93-HE     |
| 148,82,O,405,HH11,82-O-405-HH11     | 188,90,O,98,HH22,90-O-98-HH22     |
| 149,83,O,75,HE21,83-O-75-HE21       | 189,90,OD2,93,HH12,90-OD2-93-HH12 |
| 150,83,O,76,H,83-O-76-H             | 190,90,OD1,98,HH12,90-OD1-98-HH12 |
| 151,84,O,408,H,84-O-408-H           | 191,90,OD1,93,HE,90-OD1-93-HE     |
| 152,85,O,74,H,85-O-74-H             | 192,90,OD1,90,H,90-OD1-90-H       |
| 153,85,O,87,HG,85-O-87-HG           | 193,90,OD2,397,HZ1,90-OD2-397-HZ1 |
| 154,86,O,87,HG,86-O-87-HG           | 194,90,OD1,93,HH12,90-OD1-93-HH12 |
| 155,86,O,410,H,86-O-410-H           | 195,90,O,98,HH12,90-O-98-HH12     |
| 156,87,OG,410,HD22,87-OG-410-HD22   | 196,90,OD1,93,HH22,90-OD1-93-HH22 |
| 157,87,O,67,HG,87-O-67-HG           | 197,91,OG1,397,HZ1,91-OG1-397-HZ1 |
| 158,87,O,87,HG,87-O-87-HG           | 198,91,OG1,397,HZ2,91-OG1-397-HZ2 |
| 159,87,OG,67,HG,87-OG-67-HG         | 199,91,OG1,397,HZ3,91-OG1-397-HZ3 |
| 160,87,O,413,HE22,87-O-413-HE22     | 200,91,O,95,H,91-O-95-H           |
| 161,87,O,413,HE21,87-O-413-HE21     | 201,92,O,95,H,92-O-95-H           |
| 162,88,O,91,H,88-O-91-H             | 202,92,O,96,H,92-O-96-H           |
| 163,88,O,92,H,88-O-92-H             | 203,93,O,98,H,93-O-98-H           |
| 164,89,O,92,H,89-O-92-H             | 204,93,O,97,H,93-O-97-H           |
| 165,89,O,93,H,89-O-93-H             | 205,94,OE1,98,HH11,94-OE1-98-HH11 |

|                                     |                                       |
|-------------------------------------|---------------------------------------|
| 206,94,OE1,397,HZ1,94-OE1-397-HZ1   | 246,101,OD2,454,HZ1,101-OD2-454-HZ1   |
| 207,94,OE1,397,HZ2,94-OE1-397-HZ2   | 247,101,O,104,HZ3,101-O-104-HZ3       |
| 208,94,OE1,397,HZ3,94-OE1-397-HZ3   | 248,101,OD2,392,HH12,101-OD2-392-HH12 |
| 209,94,OE1,397,H,94-OE1-397-H       | 249,101,OD2,392,HH22,101-OD2-392-HH22 |
| 210,94,O,98,H,94-O-98-H             | 250,101,OD2,104,HZ1,101-OD2-104-HZ1   |
| 211,94,OE1,99,HE21,94-OE1-99-HE21   | 251,101,OD2,104,HZ2,101-OD2-104-HZ2   |
| 212,94,OE1,98,HE,94-OE1-98-HE       | 252,101,OD1,392,HH12,101-OD1-392-HH12 |
| 213,94,OE1,98,HH21,94-OE1-98-HH21   | 253,101,OD1,392,HH22,101-OD1-392-HH22 |
| 214,94,O,99,HE21,94-O-99-HE21       | 254,101,OD2,104,HZ3,101-OD2-104-HZ3   |
| 215,94,O,99,H,94-O-99-H             | 255,101,O,104,HZ2,101-O-104-HZ2       |
| 216,95,O,100,H,95-O-100-H           | 256,101,OD2,101,H,101-OD2-101-H       |
| 217,95,O,99,H,95-O-99-H             | 257,101,O,391,HG1,101-O-391-HG1       |
| 218,96,O,454,H,96-O-454-H           | 258,101,OD1,104,HZ1,101-OD1-104-HZ1   |
| 219,97,O,454,HZ3,97-O-454-HZ3       | 259,102,O,391,HG1,102-O-391-HG1       |
| 220,97,O,454,HZ2,97-O-454-HZ2       | 260,102,OD1,392,HH11,102-OD1-392-HH11 |
| 221,97,O,454,HZ1,97-O-454-HZ1       | 261,102,OD2,392,HE,102-OD2-392-HE     |
| 222,97,O,100,H,97-O-100-H           | 262,102,O,392,H,102-O-392-H           |
| 223,98,O,99,HE21,98-O-99-HE21       | 263,102,O,391,H,102-O-391-H           |
| 224,98,O,98,HE,98-O-98-HE           | 264,102,OD1,99,HE21,102-OD1-99-HE21   |
| 225,98,O,100,H,98-O-100-H           | 265,102,OD2,392,HH21,102-OD2-392-HH21 |
| 226,98,O,98,HH11,98-O-98-HH11       | 266,102,OD2,394,HG1,102-OD2-394-HG1   |
| 227,99,OE1,94,HE21,99-OE1-94-HE21   | 267,102,O,104,H,102-O-104-H           |
| 228,99,OE1,98,HH21,99-OE1-98-HH21   | 268,102,OD1,392,HH21,102-OD1-392-HH21 |
| 229,99,OE1,98,HH11,99-OE1-98-HH11   | 269,102,OD1,392,HE,102-OD1-392-HE     |
| 230,99,O,103,H,99-O-103-H           | 270,102,OD2,99,HE21,102-OD2-99-HE21   |
| 231,99,O,102,H,99-O-102-H           | 271,102,OD2,392,HH11,102-OD2-392-HH11 |
| 232,99,O,101,H,99-O-101-H           | 272,102,OD1,394,HG1,102-OD1-394-HG1   |
| 233,99,OE1,98,HE,99-OE1-98-HE       | 273,103,O,105,H,103-O-105-H           |
| 234,100,O,104,H,100-O-104-H         | 274,103,O,388,HD1,103-O-388-HD1       |
| 235,100,O,103,H,100-O-103-H         | 275,104,O,455,HE,104-O-455-HE         |
| 236,101,O,392,HH12,101-O-392-HH12   | 276,104,O,455,HH21,104-O-455-HH21     |
| 237,101,O,104,HZ1,101-O-104-HZ1     | 277,104,O,127,HG,104-O-127-HG         |
| 238,101,OD1,454,HZ3,101-OD1-454-HZ3 | 278,104,O,455,HH22,104-O-455-HH22     |
| 239,101,OD1,454,HZ1,101-OD1-454-HZ1 | 279,105,O,389,H,105-O-389-H           |
| 240,101,OD1,104,HZ2,101-OD1-104-HZ2 | 280,107,O,109,H,107-O-109-H           |
| 241,101,OD1,104,HZ3,101-OD1-104-HZ3 | 281,108,OD1,108,H,108-OD1-108-H       |
| 242,101,OD1,454,HZ2,101-OD1-454-HZ2 | 282,108,OD2,108,H,108-OD2-108-H       |
| 243,101,OD2,454,HZ3,101-OD2-454-HZ3 | 283,109,O,113,HG1,109-O-113-HG1       |
| 244,101,OD2,454,HZ2,101-OD2-454-HZ2 | 284,109,O,113,H,109-O-113-H           |
| 245,101,O,392,HH11,101-O-392-HH11   | 285,109,O,112,H,109-O-112-H           |

|                                       |                                       |
|---------------------------------------|---------------------------------------|
| 286,110,OH,252,HZ1,110-OH-252-HZ1     | 326,119,OE1,306,HZ3,119-OE1-306-HZ3   |
| 287,110,OH,252,HZ3,110-OH-252-HZ3     | 327,119,OE1,134,HH12,119-OE1-134-HH12 |
| 288,110,O,113,H,110-O-113-H           | 328,119,OE1,306,HZ1,119-OE1-306-HZ1   |
| 289,110,O,113,HG1,110-O-113-HG1       | 329,119,OE1,306,HZ2,119-OE1-306-HZ2   |
| 290,110,O,114,H,110-O-114-H           | 330,119,NE2,306,HZ2,119-NE2-306-HZ2   |
| 291,110,OH,252,HZ2,110-OH-252-HZ2     | 331,119,OE1,259,HH,119-OE1-259-HH     |
| 292,111,O,115,H,111-O-115-H           | 332,119,O,134,HH22,119-O-134-HH22     |
| 293,111,OG1,112,H,111-OG1-112-H       | 333,119,O,309,HD22,119-O-309-HD22     |
| 294,111,OG1,232,HD22,111-OG1-232-HD22 | 334,119,O,309,HD21,119-O-309-HD21     |
| 295,111,O,114,H,111-O-114-H           | 335,119,O,134,HH12,119-O-134-HH12     |
| 296,112,O,114,H,112-O-114-H           | 336,119,NE2,309,HD22,119-NE2-309-HD22 |
| 297,112,O,115,H,112-O-115-H           | 337,119,OE1,309,HD21,119-OE1-309-HD21 |
| 298,113,O,118,H,113-O-118-H           | 338,119,OE1,309,HD22,119-OE1-309-HD22 |
| 299,114,O,255,HD21,114-O-255-HD21     | 339,119,OE1,124,HG,119-OE1-124-HG     |
| 300,114,O,117,H,114-O-117-H           | 340,119,OE1,117,HD22,119-OE1-117-HD22 |
| 301,114,O,118,H,114-O-118-H           | 341,120,OG,116,HG,120-OG-116-HG       |
| 302,115,O,118,H,115-O-118-H           | 342,120,O,134,HH22,120-O-134-HH22     |
| 303,115,O,119,H,115-O-119-H           | 343,120,O,134,HH12,120-O-134-HH12     |
| 304,115,O,120,H,115-O-120-H           | 344,120,OG,122,H,120-OG-122-H         |
| 305,116,O,120,H,116-O-120-H           | 345,120,O,124,HG,120-O-124-HG         |
| 306,116,O,119,H,116-O-119-H           | 346,120,O,124,H,120-O-124-H           |
| 307,116,OG,309,HD21,116-OG-309-HD21   | 347,120,O,123,H,120-O-123-H           |
| 308,116,OG,516,H10,116-OG-516-H10     | 348,120,OG,123,H,120-OG-123-H         |
| 309,116,O,309,HD21,116-O-309-HD21     | 349,121,O,131,HE1,121-O-131-HE1       |
| 310,116,O,119,HE21,116-O-119-HE21     | 350,121,O,106,HH21,121-O-106-HH21     |
| 311,116,O,309,HD22,116-O-309-HD22     | 351,121,N,134,HH12,121-N-134-HH12     |
| 312,117,O,119,HE21,117-O-119-HE21     | 352,121,O,124,H,121-O-124-H           |
| 313,117,O,119,H,117-O-119-H           | 353,121,O,124,HG,121-O-124-HG         |
| 314,117,OD1,119,HE21,117-OD1-119-HE21 | 354,121,O,106,HE,121-O-106-HE         |
| 315,117,OD1,306,HZ1,117-OD1-306-HZ1   | 355,121,O,455,HH12,121-O-455-HH12     |
| 316,117,OD1,255,HD21,117-OD1-255-HD21 | 356,122,OG,106,HH21,122-OG-106-HH21   |
| 317,117,OD1,309,HD22,117-OD1-309-HD22 | 357,122,O,106,HH21,122-O-106-HH21     |
| 318,117,O,117,HD22,117-O-117-HD22     | 358,122,O,106,HE,122-O-106-HE         |
| 319,117,O,306,HZ3,117-O-306-HZ3       | 359,124,O,126,H,124-O-126-H           |
| 320,117,OD1,306,HZ2,117-OD1-306-HZ2   | 360,124,OG,126,H,124-OG-126-H         |
| 321,117,O,306,HZ1,117-O-306-HZ1       | 361,125,O,106,H,125-O-106-H           |
| 322,117,OD1,306,HZ3,117-OD1-306-HZ3   | 362,125,O,127,HG,125-O-127-HG         |
| 323,117,O,306,HZ2,117-O-306-HZ2       | 363,126,OD2,306,HZ2,126-OD2-306-HZ2   |
| 324,118,O,119,HE21,118-O-119-HE21     | 364,126,OD2,131,H,126-OD2-131-H       |
| 325,118,O,124,HG,118-O-124-HG         | 365,126,O,124,HG,126-O-124-HG         |

|                                       |                                       |
|---------------------------------------|---------------------------------------|
| 366,126,OD1,306,HZ2,126-OD1-306-HZ2   | 406,136,O,140,HD22,136-O-140-HD22     |
| 367,126,OD1,131,H,126-OD1-131-H       | 407,136,O,140,H,136-O-140-H           |
| 368,126,OD1,128,H,126-OD1-128-H       | 408,137,O,141,H,137-O-141-H           |
| 369,126,OD2,128,H,126-OD2-128-H       | 409,138,O,142,H,138-O-142-H           |
| 370,126,O,127,HG,126-O-127-HG         | 410,139,OE1,143,HZ1,139-OE1-143-HZ1   |
| 371,126,OD1,126,H,126-OD1-126-H       | 411,139,OE1,143,HZ2,139-OE1-143-HZ2   |
| 372,126,OD1,127,H,126-OD1-127-H       | 412,139,OE1,135,HE,139-OE1-135-HE     |
| 373,126,O,455,HH22,126-O-455-HH22     | 413,139,OE1,136,HH11,139-OE1-136-HH11 |
| 374,126,OD1,119,HE22,126-OD1-119-HE22 | 414,139,OE1,143,HZ3,139-OE1-143-HZ3   |
| 375,126,OD1,306,HZ3,126-OD1-306-HZ3   | 415,139,O,143,HZ1,139-O-143-HZ1       |
| 376,126,OD1,134,HH11,126-OD1-134-HH11 | 416,139,O,143,H,139-O-143-H           |
| 377,126,OD2,134,HH11,126-OD2-134-HH11 | 417,139,O,143,HZ2,139-O-143-HZ2       |
| 378,126,OD1,124,HG,126-OD1-124-HG     | 418,139,OE1,136,HH22,139-OE1-136-HH22 |
| 379,126,OD2,127,H,126-OD2-127-H       | 419,139,O,139,HE21,139-O-139-HE21     |
| 380,127,OG,104,HZ3,127-OG-104-HZ3     | 420,139,O,143,HZ3,139-O-143-HZ3       |
| 381,127,OG,104,HZ1,127-OG-104-HZ1     | 421,139,OE1,135,HH12,139-OE1-135-HH12 |
| 382,127,O,104,HZ2,127-O-104-HZ2       | 422,139,OE1,135,HH11,139-OE1-135-HH11 |
| 383,127,O,104,HZ3,127-O-104-HZ3       | 423,139,OE1,135,HH21,139-OE1-135-HH21 |
| 384,127,O,104,HZ1,127-O-104-HZ1       | 424,140,OD1,143,HZ2,140-OD1-143-HZ2   |
| 385,127,OG,104,HZ2,127-OG-104-HZ2     | 425,140,OD1,143,HZ1,140-OD1-143-HZ1   |
| 386,127,OG,455,HH21,127-OG-455-HH21   | 426,140,OD1,136,HH12,140-OD1-136-HH12 |
| 387,128,O,132,H,128-O-132-H           | 427,140,OD1,143,HZ3,140-OD1-143-HZ3   |
| 388,128,O,131,H,128-O-131-H           | 428,140,OD1,139,HE21,140-OD1-139-HE21 |
| 389,129,O,133,H,129-O-133-H           | 429,140,O,143,H,140-O-143-H           |
| 390,129,O,297,HD22,129-O-297-HD22     | 430,140,OD1,136,HE,140-OD1-136-HE     |
| 391,130,O,133,H,130-O-133-H           | 431,140,OD1,139,HE22,140-OD1-139-HE22 |
| 392,130,O,134,H,130-O-134-H           | 432,140,OD1,136,HH21,140-OD1-136-HH21 |
| 393,130,O,299,HD21,130-O-299-HD21     | 433,140,O,144,H,140-O-144-H           |
| 394,130,O,297,HD22,130-O-297-HD22     | 434,140,O,144,HG,140-O-144-HG         |
| 395,131,O,134,H,131-O-134-H           | 435,141,O,144,HG,141-O-144-HG         |
| 396,131,O,135,H,131-O-135-H           | 436,141,O,145,H,141-O-145-H           |
| 397,132,O,136,H,132-O-136-H           | 437,141,O,144,H,141-O-144-H           |
| 398,133,O,137,H,133-O-137-H           | 438,142,O,146,HG,142-O-146-HG         |
| 399,133,O,136,H,133-O-136-H           | 439,142,O,146,H,142-O-146-H           |
| 400,133,O,297,HD22,133-O-297-HD22     | 440,142,O,147,H,142-O-147-H           |
| 401,134,O,138,H,134-O-138-H           | 441,142,O,145,H,142-O-145-H           |
| 402,135,O,139,H,135-O-139-H           | 442,143,O,146,H,143-O-146-H           |
| 403,135,O,138,H,135-O-138-H           | 443,143,O,148,H,143-O-148-H           |
| 404,135,O,139,HE21,135-O-139-HE21     | 444,143,O,147,H,143-O-147-H           |
| 405,136,O,139,H,136-O-139-H           | 445,144,O,144,HG,144-O-144-HG         |

|                                       |                                       |
|---------------------------------------|---------------------------------------|
| 446,144,O,158,HH,144-O-158-HH         | 486,155,OG1,154,HG,155-OG1-154-HG     |
| 447,145,O,162,HE2,145-O-162-HE2       | 487,155,OG1,153,HG,155-OG1-153-HG     |
| 448,145,O,146,HG,145-O-146-HG         | 488,155,O,155,HG1,155-O-155-HG1       |
| 449,146,OG,147,H,146-OG-147-H         | 489,155,OG1,358,HH22,155-OG1-358-HH22 |
| 450,146,O,159,H,146-O-159-H           | 490,156,O,153,HG,156-O-153-HG         |
| 451,146,O,146,HG,146-O-146-HG         | 491,156,OG,358,HH12,156-OG-358-HH12   |
| 452,148,O,158,H,148-O-158-H           | 492,156,OG,358,HH22,156-OG-358-HH22   |
| 453,149,O,149,HG,149-O-149-HG         | 493,156,O,149,HG,156-O-149-HG         |
| 454,149,OG,154,HG,149-OG-154-HG       | 494,156,OG,358,HH21,156-OG-358-HH21   |
| 455,150,OD2,153,HG,150-OD2-153-HG     | 495,156,OG,356,HH12,156-OG-356-HH12   |
| 456,150,O,153,H,150-O-153-H           | 496,156,OG,155,HG1,156-OG-155-HG1     |
| 457,150,OD1,152,H,150-OD1-152-H       | 497,156,OG,153,HG,156-OG-153-HG       |
| 458,150,OD1,158,HH,150-OD1-158-HH     | 498,156,OG,356,HH22,156-OG-356-HH22   |
| 459,150,O,154,HG,150-O-154-HG         | 499,156,O,150,H,156-O-150-H           |
| 460,150,OD1,153,HG,150-OD1-153-HG     | 500,156,OG,356,HH21,156-OG-356-HH21   |
| 461,150,O,152,H,150-O-152-H           | 501,156,OG,157,H,156-OG-157-H         |
| 462,150,OD1,153,H,150-OD1-153-H       | 502,157,O,161,H,157-O-161-H           |
| 463,150,OD2,153,H,150-OD2-153-H       | 503,157,O,160,H,157-O-160-H           |
| 464,150,OD2,152,H,150-OD2-152-H       | 504,157,O,156,HG,157-O-156-HG         |
| 465,150,O,149,HG,150-O-149-HG         | 505,158,O,161,H,158-O-161-H           |
| 466,151,O,153,H,151-O-153-H           | 506,158,O,162,H,158-O-162-H           |
| 467,152,O,154,H,152-O-154-H           | 507,159,O,163,H,159-O-163-H           |
| 468,153,OG,156,H,153-OG-156-H         | 508,159,O,162,H,159-O-162-H           |
| 469,153,O,156,H,153-O-156-H           | 509,160,OE1,356,HE,160-OE1-356-HE     |
| 470,153,OG,154,H,153-OG-154-H         | 510,160,OE1,359,H,160-OE1-359-H       |
| 471,153,OG,155,H,153-OG-155-H         | 511,160,OE2,356,HH22,160-OE2-356-HH22 |
| 472,153,O,153,HG,153-O-153-HG         | 512,160,O,164,H,160-O-164-H           |
| 473,153,O,155,H,153-O-155-H           | 513,160,OE2,358,HE,160-OE2-358-HE     |
| 474,153,OG,156,HG,153-OG-156-HG       | 514,160,OE2,358,HH11,160-OE2-358-HH11 |
| 475,154,O,154,HG,154-O-154-HG         | 515,160,O,164,HG,160-O-164-HG         |
| 476,154,O,149,HG,154-O-149-HG         | 516,160,OE2,157,H,160-OE2-157-H       |
| 477,154,OG,155,HG1,154-OG-155-HG1     | 517,160,OE1,156,HG,160-OE1-156-HG     |
| 478,154,OG,155,H,154-OG-155-H         | 518,160,OE2,356,HE,160-OE2-356-HE     |
| 479,154,O,155,HG1,154-O-155-HG1       | 519,160,OE2,358,HH21,160-OE2-358-HH21 |
| 480,155,O,358,HH22,155-O-358-HH22     | 520,160,OE1,356,HH12,160-OE1-356-HH12 |
| 481,155,OG1,358,HH12,155-OG1-358-HH12 | 521,160,OE1,356,HH21,160-OE1-356-HH21 |
| 482,155,O,358,HH21,155-O-358-HH21     | 522,160,OE2,156,HG,160-OE2-156-HG     |
| 483,155,O,149,HG,155-O-149-HG         | 523,160,OE2,359,H,160-OE2-359-H       |
| 484,155,OG1,156,HG,155-OG1-156-HG     | 524,160,OE2,356,HH12,160-OE2-356-HH12 |
| 485,155,OG1,360,HG,155-OG1-360-HG     | 525,160,OE1,356,HH22,160-OE1-356-HH22 |

526,160,OE1,358,HH11,160-OE1-358-HH11  
527,160,OE1,157,H,160-OE1-157-H  
528,160,OE2,356,HH21,160-OE2-356-HH21  
529,160,OE1,358,HH21,160-OE1-358-HH21  
530,160,OE1,358,HE,160-OE1-358-HE  
531,161,OE2,165,HZ3,161-OE2-165-HZ3  
532,161,OE2,165,HZ2,161-OE2-165-HZ2  
533,161,OE1,153,HG,161-OE1-153-HG  
534,161,OE1,165,HZ1,161-OE1-165-HZ1  
535,161,O,165,HZ2,161-O-165-HZ2  
536,161,OE1,356,HH22,161-OE1-356-HH22  
537,161,OE2,156,HG,161-OE2-156-HG  
538,161,OE2,356,HH12,161-OE2-356-HH12  
539,161,OE1,356,HH12,161-OE1-356-HH12  
540,161,OE2,356,HH21,161-OE2-356-HH21  
541,161,O,165,HZ3,161-O-165-HZ3  
542,161,O,165,H,161-O-165-H  
543,161,OE1,165,HZ2,161-OE1-165-HZ2  
544,161,OE1,356,HH21,161-OE1-356-HH21  
545,161,OE2,153,HG,161-OE2-153-HG  
546,161,OE1,358,HH12,161-OE1-358-HH12  
547,161,OE2,358,HH12,161-OE2-358-HH12  
548,161,OE1,165,HZ3,161-OE1-165-HZ3  
549,161,OE1,156,HG,161-OE1-156-HG  
550,161,OE1,358,HH22,161-OE1-358-HH22  
551,161,O,165,HZ1,161-O-165-HZ1  
552,161,OE2,356,HH22,161-OE2-356-HH22  
553,162,O,166,H,162-O-166-H  
554,162,ND1,165,HZ2,162-ND1-165-HZ2  
555,162,ND1,165,HZ1,162-ND1-165-HZ1  
556,162,ND1,165,HZ3,162-ND1-165-HZ3  
557,162,O,165,H,162-O-165-H  
558,163,O,167,H,163-O-167-H  
559,163,O,166,H,163-O-166-H  
560,164,OG,356,HE,164-OG-356-HE  
561,164,O,168,H,164-O-168-H  
562,164,OG,356,HH21,164-OG-356-HH21  
563,164,OG,356,HH11,164-OG-356-HH11  
564,165,O,169,H,165-O-169-H  
565,165,O,168,H,165-O-168-H  
566,166,O,193,HG,166-O-193-HG  
567,166,OE2,206,HH21,166-OE2-206-HH21  
568,166,OE2,165,HZ2,166-OE2-165-HZ2  
569,166,O,169,H,166-O-169-H  
570,166,OE2,206,HE,166-OE2-206-HE  
571,166,OE1,206,HH21,166-OE1-206-HH21  
572,166,O,170,H,166-O-170-H  
573,166,OE2,165,HZ1,166-OE2-165-HZ1  
574,166,OE1,196,HD22,166-OE1-196-HD22  
575,166,OE1,206,HE,166-OE1-206-HE  
576,166,OE2,165,HZ3,166-OE2-165-HZ3  
577,167,O,171,H,167-O-171-H  
578,168,OE1,477,HH22,168-OE1-477-HH22  
579,168,OE2,477,HH12,168-OE2-477-HH12  
580,168,OE2,356,HH21,168-OE2-356-HH21  
581,168,O,172,HG,168-O-172-HG  
582,168,OE2,477,HH21,168-OE2-477-HH21  
583,168,OE1,477,HE,168-OE1-477-HE  
584,168,OE1,477,HH21,168-OE1-477-HH21  
585,168,OE2,356,HE,168-OE2-356-HE  
586,168,OE2,477,HE,168-OE2-477-HE  
587,168,O,171,H,168-O-171-H  
588,168,OE1,477,HH11,168-OE1-477-HH11  
589,168,OE2,356,HH11,168-OE2-356-HH11  
590,168,OE1,356,HE,168-OE1-356-HE  
591,168,OE1,356,HH21,168-OE1-356-HH21  
592,168,OE2,477,HH22,168-OE2-477-HH22  
593,168,OE1,477,HH12,168-OE1-477-HH12  
594,168,OE1,356,HH11,168-OE1-356-HH11  
595,168,O,172,H,168-O-172-H  
596,168,OE2,477,HH11,168-OE2-477-HH11  
597,169,O,173,HG1,169-O-173-HG1  
598,169,O,172,HG,169-O-172-HG  
599,169,O,173,H,169-O-173-H  
600,169,O,172,H,169-O-172-H  
601,170,O,174,H,170-O-174-H  
602,170,O,173,H,170-O-173-H  
603,171,O,173,H,171-O-173-H  
604,171,O,175,H,171-O-175-H  
605,171,O,175,HE21,171-O-175-HE21

|                                       |                                     |
|---------------------------------------|-------------------------------------|
| 606,172,O,175,H,172-O-175-H           | 646,187,O,190,H,187-O-190-H         |
| 607,172,O,176,H,172-O-176-H           | 647,187,OH,219,HD22,187-OH-219-HD22 |
| 608,172,O,175,HE21,172-O-175-HE21     | 648,187,OH,499,HZ3,187-OH-499-HZ3   |
| 609,173,OG1,209,HE2,173-OG1-209-HE2   | 649,187,OH,324,HG1,187-OH-324-HG1   |
| 610,173,O,176,H,173-O-176-H           | 650,188,O,219,HD21,188-O-219-HD21   |
| 611,173,O,177,H,173-O-177-H           | 651,189,O,192,H,189-O-192-H         |
| 612,174,O,177,H,174-O-177-H           | 652,189,OH,188,HH21,189-OH-188-HH21 |
| 613,174,O,178,H,174-O-178-H           | 653,189,O,193,H,189-O-193-H         |
| 614,175,OE1,477,HH11,175-OE1-477-HH11 | 654,189,OH,188,HE,189-OH-188-HE     |
| 615,175,OE1,510,H,175-OE1-510-H       | 655,189,O,209,HE2,189-O-209-HE2     |
| 616,175,O,175,HE21,175-O-175-HE21     | 656,189,OH,188,HH11,189-OH-188-HH11 |
| 617,175,O,179,H,175-O-179-H           | 657,189,O,193,HG,189-O-193-HG       |
| 618,175,O,178,H,175-O-178-H           | 658,190,O,194,H,190-O-194-H         |
| 619,176,O,179,H,176-O-179-H           | 659,190,O,193,HG,190-O-193-HG       |
| 620,176,OE1,175,HE22,176-OE1-175-HE22 | 660,190,O,193,H,190-O-193-H         |
| 621,176,OE1,175,HE21,176-OE1-175-HE21 | 661,191,O,195,H,191-O-195-H         |
| 622,176,O,180,H,176-O-180-H           | 662,191,O,195,HG1,191-O-195-HG1     |
| 623,176,OE2,175,HE22,176-OE2-175-HE22 | 663,192,O,196,H,192-O-196-H         |
| 624,176,OE2,172,HG,176-OE2-172-HG     | 664,192,O,196,HD22,192-O-196-HD22   |
| 625,177,O,180,H,177-O-180-H           | 665,193,O,197,H,193-O-197-H         |
| 626,177,O,182,H,177-O-182-H           | 666,193,O,196,H,193-O-196-H         |
| 627,178,O,180,H,178-O-180-H           | 667,193,OG,209,HE2,193-OG-209-HE2   |
| 628,180,O,182,H,180-O-182-H           | 668,194,O,197,H,194-O-197-H         |
| 629,181,O,183,H,181-O-183-H           | 669,194,O,198,H,194-O-198-H         |
| 630,182,O,507,HE21,182-O-507-HE21     | 670,195,O,199,H,195-O-199-H         |
| 631,182,O,508,H,182-O-508-H           | 671,196,O,200,H,196-O-200-H         |
| 632,183,ND1,507,HE21,183-ND1-507-HE21 | 672,196,OD1,207,H,196-OD1-207-H     |
| 633,183,ND1,183,H,183-ND1-183-H       | 673,197,O,201,H,197-O-201-H         |
| 634,184,O,505,H,184-O-505-H           | 674,197,O,200,H,197-O-200-H         |
| 635,184,O,506,H,184-O-506-H           | 675,198,O,202,H,198-O-202-H         |
| 636,185,OD1,187,H,185-OD1-187-H       | 676,199,O,205,H,199-O-205-H         |
| 637,185,OD1,188,H,185-OD1-188-H       | 677,199,O,204,H,199-O-204-H         |
| 638,185,O,187,H,185-O-187-H           | 678,199,O,203,H,199-O-203-H         |
| 639,185,O,189,H,185-O-189-H           | 679,200,O,204,H,200-O-204-H         |
| 640,186,O,189,H,186-O-189-H           | 680,201,O,281,H,201-O-281-H         |
| 641,186,O,190,H,186-O-190-H           | 681,202,O,282,HG1,202-O-282-HG1     |
| 642,186,O,327,HG,186-O-327-HG         | 682,202,O,282,H,202-O-282-H         |
| 643,187,OH,499,HZ2,187-OH-499-HZ2     | 683,202,O,281,H,202-O-281-H         |
| 644,187,O,191,H,187-O-191-H           | 684,203,O,205,HE,203-O-205-HE       |
| 645,187,OH,499,HZ1,187-OH-499-HZ1     | 685,203,O,205,HH11,203-O-205-HH11   |



|                                       |                                       |
|---------------------------------------|---------------------------------------|
| 686,203,O,205,HH21,203-O-205-HH21     | 726,211,O,214,H,211-O-214-H           |
| 687,203,O,205,H,203-O-205-H           | 727,212,O,216,HG,212-O-216-HG         |
| 688,204,O,205,HE,204-O-205-HE         | 728,212,O,212,HE21,212-O-212-HE21     |
| 689,204,O,205,HH11,204-O-205-HH11     | 729,212,OE1,212,H,212-OE1-212-H       |
| 690,204,O,205,HH21,204-O-205-HH21     | 730,212,O,216,H,212-O-216-H           |
| 691,206,O,205,HH11,206-O-205-HH11     | 731,212,O,215,H,212-O-215-H           |
| 692,206,O,205,HH12,206-O-205-HH12     | 732,212,OE1,216,HG,212-OE1-216-HG     |
| 693,207,O,196,HD21,207-O-196-HD21     | 733,213,OE1,212,HE22,213-OE1-212-HE22 |
| 694,208,OD2,209,H,208-OD2-209-H       | 734,213,O,257,HZ1,213-O-257-HZ1       |
| 695,208,O,211,H,208-O-211-H           | 735,213,O,257,HZ2,213-O-257-HZ2       |
| 696,208,OD1,206,HH22,208-OD1-206-HH22 | 736,213,OE1,257,HZ2,213-OE1-257-HZ2   |
| 697,208,OD1,210,HD21,208-OD1-210-HD21 | 737,213,OE1,213,H,213-OE1-213-H       |
| 698,208,OD1,210,H,208-OD1-210-H       | 738,213,OE2,264,HZ1,213-OE2-264-HZ1   |
| 699,208,OD2,210,HD21,208-OD2-210-HD21 | 739,213,OE1,216,HG,213-OE1-216-HG     |
| 700,208,OD1,209,H,208-OD1-209-H       | 740,213,OE2,257,HZ1,213-OE2-257-HZ1   |
| 701,208,OD2,206,HH22,208-OD2-206-HH22 | 741,213,OE2,264,HZ3,213-OE2-264-HZ3   |
| 702,208,OD1,210,HD22,208-OD1-210-HD22 | 742,213,OE2,264,HZ2,213-OE2-264-HZ2   |
| 703,208,OD2,210,H,208-OD2-210-H       | 743,213,OE1,264,HZ3,213-OE1-264-HZ3   |
| 704,208,OD2,206,HH11,208-OD2-206-HH11 | 744,213,OE1,264,HZ1,213-OE1-264-HZ1   |
| 705,208,OD2,206,HH12,208-OD2-206-HH12 | 745,213,O,216,H,213-O-216-H           |
| 706,208,OD2,210,HD22,208-OD2-210-HD22 | 746,213,OE1,211,HE2,213-OE1-211-HE2   |
| 707,208,OD2,208,H,208-OD2-208-H       | 747,213,OE1,257,HZ3,213-OE1-257-HZ3   |
| 708,208,OD1,208,H,208-OD1-208-H       | 748,213,OE2,211,HE2,213-OE2-211-HE2   |
| 709,208,O,210,H,208-O-210-H           | 749,213,OE1,264,HZ2,213-OE1-264-HZ2   |
| 710,208,OD1,206,HH12,208-OD1-206-HH12 | 750,213,OE1,257,HZ1,213-OE1-257-HZ1   |
| 711,209,ND1,173,HG1,209-ND1-173-HG1   | 751,213,OE2,260,HG,213-OE2-260-HG     |
| 712,209,O,212,HE21,209-O-212-HE21     | 752,213,O,217,H,213-O-217-H           |
| 713,209,O,211,H,209-O-211-H           | 753,213,OE2,213,H,213-OE2-213-H       |
| 714,209,O,210,HD22,209-O-210-HD22     | 754,213,OE1,212,HE21,213-OE1-212-HE21 |
| 715,209,ND1,209,H,209-ND1-209-H       | 755,213,OE2,257,HZ2,213-OE2-257-HZ2   |
| 716,209,O,212,HE22,209-O-212-HE22     | 756,213,OE2,207,HH,213-OE2-207-HH     |
| 717,210,O,210,HD22,210-O-210-HD22     | 757,213,O,216,HG,213-O-216-HG         |
| 718,210,O,212,HE21,210-O-212-HE21     | 758,213,OE2,257,HZ3,213-OE2-257-HZ3   |
| 719,210,OD1,210,H,210-OD1-210-H       | 759,214,O,218,H,214-O-218-H           |
| 720,210,OD1,212,HE21,210-OD1-212-HE21 | 760,214,O,217,H,214-O-217-H           |
| 721,210,O,212,H,210-O-212-H           | 761,215,O,219,H,215-O-219-H           |
| 722,211,ND1,213,H,211-ND1-213-H       | 762,215,O,218,H,215-O-218-H           |
| 723,211,O,215,H,211-O-215-H           | 763,215,O,220,H,215-O-220-H           |
| 724,211,ND1,214,H,211-ND1-214-H       | 764,215,O,217,H,215-O-217-H           |
| 725,211,ND1,208,H,211-ND1-208-H       | 765,216,OG,221,HD22,216-OG-221-HD22   |

|                                       |                                       |
|---------------------------------------|---------------------------------------|
| 766,216,O,220,H,216-O-220-H           | 806,222,OD1,225,H,222-OD1-225-H       |
| 767,216,OG,257,HZ3,216-OG-257-HZ3     | 807,222,OD1,223,H,222-OD1-223-H       |
| 768,216,O,222,HD22,216-O-222-HD22     | 808,222,OD1,224,H,222-OD1-224-H       |
| 769,216,OG,257,HZ2,216-OG-257-HZ2     | 809,222,O,224,H,222-O-224-H           |
| 770,216,O,257,HZ3,216-O-257-HZ3       | 810,223,O,227,H,223-O-227-H           |
| 771,216,OG,257,HZ1,216-OG-257-HZ1     | 811,223,O,226,H,223-O-226-H           |
| 772,216,OG,212,HE21,216-OG-212-HE21   | 812,223,OD1,247,HG,223-OD1-247-HG     |
| 773,216,O,221,HD22,216-O-221-HD22     | 813,223,O,223,HD22,223-O-223-HD22     |
| 774,216,O,257,HZ1,216-O-257-HZ1       | 814,223,OD1,223,H,223-OD1-223-H       |
| 775,216,O,216,HG,216-O-216-HG         | 815,224,O,227,H,224-O-227-H           |
| 776,216,O,219,H,216-O-219-H           | 816,224,O,228,H,224-O-228-H           |
| 777,216,O,257,HZ2,216-O-257-HZ2       | 817,225,O,496,H,225-O-496-H           |
| 778,217,O,222,HD21,217-O-222-HD21     | 818,226,O,247,HG,226-O-247-HG         |
| 779,217,O,222,HD22,217-O-222-HD22     | 819,226,OE1,57,HZ2,226-OE1-57-HZ2     |
| 780,218,O,219,HD22,218-O-219-HD22     | 820,226,OE1,57,HZ3,226-OE1-57-HZ3     |
| 781,218,O,222,HD22,218-O-222-HD22     | 821,226,OE2,57,HZ3,226-OE2-57-HZ3     |
| 782,218,O,222,HD21,218-O-222-HD21     | 822,226,OE1,247,HG,226-OE1-247-HG     |
| 783,219,O,222,HD22,219-O-222-HD22     | 823,226,OE1,223,HD22,226-OE1-223-HD22 |
| 784,219,O,222,H,219-O-222-H           | 824,226,OE2,57,HZ2,226-OE2-57-HZ2     |
| 785,219,OD1,188,HH11,219-OD1-188-HH11 | 825,226,OE1,226,H,226-OE1-226-H       |
| 786,219,O,219,HD22,219-O-219-HD22     | 826,226,OE2,222,HD22,226-OE2-222-HD22 |
| 787,219,O,221,H,219-O-221-H           | 827,226,OE2,57,HZ1,226-OE2-57-HZ1     |
| 788,219,O,222,HD21,219-O-222-HD21     | 828,226,OE2,247,HG,226-OE2-247-HG     |
| 789,219,OD1,188,HE,219-OD1-188-HE     | 829,226,OE1,57,HZ1,226-OE1-57-HZ1     |
| 790,219,OD1,188,HH21,219-OD1-188-HH21 | 830,226,O,232,HD21,226-O-232-HD21     |
| 791,220,O,257,HZ3,220-O-257-HZ3       | 831,226,OE2,223,HD22,226-OE2-223-HD22 |
| 792,220,O,222,H,220-O-222-H           | 832,227,O,232,HD22,227-O-232-HD22     |
| 793,220,O,221,HD22,220-O-221-HD22     | 833,227,O,232,HD21,227-O-232-HD21     |
| 794,220,O,257,HZ1,220-O-257-HZ1       | 834,228,O,496,H,228-O-496-H           |
| 795,220,O,222,HD21,220-O-222-HD21     | 835,229,O,231,H,229-O-231-H           |
| 796,221,O,223,H,221-O-223-H           | 836,229,O,232,HD22,229-O-232-HD22     |
| 797,221,O,221,HD22,221-O-221-HD22     | 837,229,O,232,H,229-O-232-H           |
| 798,221,O,223,HD22,221-O-223-HD22     | 838,230,O,494,HH,230-O-494-HH         |
| 799,221,O,257,HZ3,221-O-257-HZ3       | 839,230,O,230,HG,230-O-230-HG         |
| 800,221,O,257,HZ1,221-O-257-HZ1       | 840,230,OG,494,HH,230-OG-494-HH       |
| 801,221,OD1,223,HD22,221-OD1-223-HD22 | 841,231,O,229,H,231-O-229-H           |
| 802,221,OD1,216,HG,221-OD1-216-HG     | 842,232,O,235,H,232-O-235-H           |
| 803,221,O,257,HZ2,221-O-257-HZ2       | 843,232,OD1,235,H,232-OD1-235-H       |
| 804,222,OD1,220,H,222-OD1-220-H       | 844,232,OD1,234,H,232-OD1-234-H       |
| 805,222,O,222,HD21,222-O-222-HD21     | 845,232,OD1,494,HH,232-OD1-494-HH     |

|                                       |                                     |
|---------------------------------------|-------------------------------------|
| 846,232,O,236,H,232-O-236-H           | 886,245,OD1,248,H,245-OD1-248-H     |
| 847,233,O,237,H,233-O-237-H           | 887,246,O,249,HD22,246-O-249-HD22   |
| 848,233,O,236,H,233-O-236-H           | 888,246,O,250,H,246-O-250-H         |
| 849,234,O,241,HH11,234-O-241-HH11     | 889,246,O,249,H,246-O-249-H         |
| 850,234,O,237,H,234-O-237-H           | 890,247,OG,245,HD21,247-OG-245-HD21 |
| 851,235,OD2,241,HH11,235-OD2-241-HH11 | 891,247,O,223,HD21,247-O-223-HD21   |
| 852,235,OD1,110,H,235-OD1-110-H       | 892,247,OG,223,HD21,247-OG-223-HD21 |
| 853,235,OD1,235,H,235-OD1-235-H       | 893,247,OG,223,HD22,247-OG-223-HD22 |
| 854,235,OD2,110,H,235-OD2-110-H       | 894,247,O,251,H,247-O-251-H         |
| 855,235,OD1,111,H,235-OD1-111-H       | 895,247,O,250,H,247-O-250-H         |
| 856,235,O,241,HH12,235-O-241-HH12     | 896,248,O,251,H,248-O-251-H         |
| 857,235,OD2,232,HD22,235-OD2-232-HD22 | 897,248,O,252,H,248-O-252-H         |
| 858,235,OD1,111,HG1,235-OD1-111-HG1   | 898,248,O,110,HH,248-O-110-HH       |
| 859,235,O,241,HH11,235-O-241-HH11     | 899,249,O,252,HZ3,249-O-252-HZ3     |
| 860,235,OD1,232,HD22,235-OD1-232-HD22 | 900,249,OD1,252,HZ2,249-OD1-252-HZ2 |
| 861,235,OD2,235,H,235-OD2-235-H       | 901,249,O,253,H,249-O-253-H         |
| 862,235,OD2,111,H,235-OD2-111-H       | 902,249,O,252,H,249-O-252-H         |
| 863,235,OD1,232,H,235-OD1-232-H       | 903,249,OD1,252,HZ3,249-OD1-252-HZ3 |
| 864,235,OD2,111,HG1,235-OD2-111-HG1   | 904,249,OD1,245,H,249-OD1-245-H     |
| 865,236,O,241,HH12,236-O-241-HH12     | 905,249,O,249,HD22,249-O-249-HD22   |
| 866,236,O,80,H,236-O-80-H             | 906,249,OD1,252,HZ1,249-OD1-252-HZ1 |
| 867,237,O,240,H,237-O-240-H           | 907,249,O,252,HZ1,249-O-252-HZ1     |
| 868,238,O,242,H,238-O-242-H           | 908,250,O,253,H,250-O-253-H         |
| 869,238,O,241,H,238-O-241-H           | 909,250,O,223,HD21,250-O-223-HD21   |
| 870,239,O,242,H,239-O-242-H           | 910,250,O,221,HD21,250-O-221-HD21   |
| 871,239,O,243,H,239-O-243-H           | 911,250,O,254,H,250-O-254-H         |
| 872,239,O,241,H,239-O-241-H           | 912,251,O,255,H,251-O-255-H         |
| 873,240,O,243,H,240-O-243-H           | 913,251,O,255,HD22,251-O-255-HD22   |
| 874,240,O,245,HD22,240-O-245-HD22     | 914,252,O,256,H,252-O-256-H         |
| 875,240,O,245,H,240-O-245-H           | 915,252,O,255,H,252-O-255-H         |
| 876,243,O,245,HD22,243-O-245-HD22     | 916,253,OD1,257,HZ3,253-OD1-257-HZ3 |
| 877,243,O,245,H,243-O-245-H           | 917,253,OD1,257,HZ1,253-OD1-257-HZ1 |
| 878,244,O,249,HD21,244-O-249-HD21     | 918,253,OD2,252,HZ3,253-OD2-252-HZ3 |
| 879,244,O,249,HD22,244-O-249-HD22     | 919,253,OD2,257,HZ3,253-OD2-257-HZ3 |
| 880,245,OD1,247,H,245-OD1-247-H       | 920,253,OD1,252,HZ2,253-OD1-252-HZ2 |
| 881,245,O,249,H,245-O-249-H           | 921,253,OD2,257,HZ2,253-OD2-257-HZ2 |
| 882,245,ND2,245,H,245-ND2-245-H       | 922,253,OD1,252,HZ1,253-OD1-252-HZ1 |
| 883,245,OD1,247,HG,245-OD1-247-HG     | 923,253,OD1,252,HZ3,253-OD1-252-HZ3 |
| 884,245,O,249,HD22,245-O-249-HD22     | 924,253,O,257,HZ2,253-O-257-HZ2     |
| 885,245,O,248,H,245-O-248-H           | 925,253,OD2,257,HZ1,253-OD2-257-HZ1 |

|                                       |                                        |
|---------------------------------------|----------------------------------------|
| 926,253,O,256,H,253-O-256-H           | 966,260,O,264,HZ2,260-O-264-HZ2        |
| 927,253,OD2,252,HZ2,253-OD2-252-HZ2   | 967,260,OG,264,HZ1,260-OG-264-HZ1      |
| 928,253,OD1,257,HZ2,253-OD1-257-HZ2   | 968,260,O,264,H,260-O-264-H            |
| 929,253,O,257,H,253-O-257-H           | 969,261,O,265,H,261-O-265-H            |
| 930,253,O,257,HZ3,253-O-257-HZ3       | 970,261,O,264,H,261-O-264-H            |
| 931,253,OD2,252,HZ1,253-OD2-252-HZ1   | 971,262,O,266,H,262-O-266-H            |
| 932,254,O,258,H,254-O-258-H           | 972,262,O,265,H,262-O-265-H            |
| 933,254,O,257,H,254-O-257-H           | 973,263,OE1,259,HH,263-OE1-259-HH      |
| 934,255,OD1,116,H,255-OD1-116-H       | 974,263,OE1,267,HZ1,263-OE1-267-HZ1    |
| 935,255,OD1,117,H,255-OD1-117-H       | 975,263,O,267,H,263-O-267-H            |
| 936,255,O,259,H,255-O-259-H           | 976,263,O,267,HZ1,263-O-267-HZ1        |
| 937,256,OE2,252,HZ2,256-OE2-252-HZ2   | 977,263,O,266,H,263-O-266-H            |
| 938,256,OE1,252,HZ2,256-OE1-252-HZ2   | 978,263,O,263,HE21,263-O-263-HE21      |
| 939,256,O,260,HG,256-O-260-HG         | 979,263,O,267,HZ2,263-O-267-HZ2        |
| 940,256,OE1,117,HD21,256-OE1-117-HD21 | 980,263,OE1,267,HZ3,263-OE1-267-HZ3    |
| 941,256,OE1,252,HZ3,256-OE1-252-HZ3   | 981,263,O,267,HZ3,263-O-267-HZ3        |
| 942,256,OE2,255,HD22,256-OE2-255-HD22 | 982,263,OE1,267,HZ2,263-OE1-267-HZ2    |
| 943,256,OE1,252,HZ1,256-OE1-252-HZ1   | 983,264,O,268,H,264-O-268-H            |
| 944,256,OE2,252,HZ3,256-OE2-252-HZ3   | 984,264,O,267,H,264-O-267-H            |
| 945,256,OE1,255,HD22,256-OE1-255-HD22 | 985,265,O,205,HH22,265-O-205-HH22      |
| 946,256,OE2,117,HD21,256-OE2-117-HD21 | 986,265,O,269,H,265-O-269-H            |
| 947,256,O,260,H,256-O-260-H           | 987,265,O,268,H,265-O-268-H            |
| 948,256,OE2,260,HG,256-OE2-260-HG     | 988,266,O,269,H,266-O-269-H            |
| 949,256,OE2,252,HZ1,256-OE2-252-HZ1   | 989,266,O,270,H,266-O-270-H            |
| 950,256,O,259,H,256-O-259-H           | 990,267,O,271,HZ1,267-O-271-HZ1        |
| 951,257,O,261,H,257-O-261-H           | 991,267,O,271,HZ3,267-O-271-HZ3        |
| 952,257,O,260,HG,257-O-260-HG         | 992,267,O,270,H,267-O-270-H            |
| 953,258,O,261,H,258-O-261-H           | 993,267,O,271,H,267-O-271-H            |
| 954,258,O,262,H,258-O-262-H           | 994,267,O,271,HZ2,267-O-271-HZ2        |
| 955,259,OH,309,HD22,259-OH-309-HD22   | 995,268,OE1,205,HH22,268-OE1-205-HH22  |
| 956,259,O,263,H,259-O-263-H           | 996,268,O,272,H,268-O-272-H            |
| 957,259,O,262,H,259-O-262-H           | 997,268,OE1,267,HZ2,268-OE1-267-HZ2    |
| 958,259,OH,117,HD22,259-OH-117-HD22   | 998,268,OE1,267,HZ1,268-OE1-267-HZ1    |
| 959,259,OH,263,HE21,259-OH-263-HE21   | 999,268,OE2,205,HH12,268-OE2-205-HH12  |
| 960,259,OH,119,HE21,259-OH-119-HE21   | 1000,268,OE1,205,HH12,268-OE1-205-HH12 |
| 961,259,OH,119,HE22,259-OH-119-HE22   | 1001,268,OE2,205,HH22,268-OE2-205-HH22 |
| 962,259,OH,309,HD21,259-OH-309-HD21   | 1002,268,OE1,267,HZ3,268-OE1-267-HZ3   |
| 963,259,O,263,HE21,259-O-263-HE21     | 1003,268,OE2,267,HZ1,268-OE2-267-HZ1   |
| 964,260,O,264,HZ1,260-O-264-HZ1       | 1004,268,OE2,271,HZ1,268-OE2-271-HZ1   |
| 965,260,OG,264,HZ2,260-OG-264-HZ2     | 1005,268,OE2,267,HZ3,268-OE2-267-HZ3   |

|                                        |                                        |
|----------------------------------------|----------------------------------------|
| 1006,268,OE1,264,HZ3,268-OE1-264-HZ3   | 1046,272,OG1,279,HH22,272-OG1-279-HH22 |
| 1007,268,OE2,271,HZ2,268-OE2-271-HZ2   | 1047,272,OG1,205,HH12,272-OG1-205-HH12 |
| 1008,268,OE1,205,HH21,268-OE1-205-HH21 | 1048,272,OG1,279,HH12,272-OG1-279-HH12 |
| 1009,268,OE1,207,HH,268-OE1-207-HH     | 1049,272,O,279,HH21,272-O-279-HH21     |
| 1010,268,OE1,271,HZ3,268-OE1-271-HZ3   | 1050,272,O,279,HH12,272-O-279-HH12     |
| 1011,268,OE2,205,HH11,268-OE2-205-HH11 | 1051,274,OE1,275,HZ2,274-OE1-275-HZ2   |
| 1012,268,OE1,271,HZ1,268-OE1-271-HZ1   | 1052,274,O,276,H,274-O-276-H           |
| 1013,268,OE1,205,HH11,268-OE1-205-HH11 | 1053,274,OE2,275,HZ2,274-OE2-275-HZ2   |
| 1014,268,OE1,271,HZ2,268-OE1-271-HZ2   | 1054,274,OE2,276,H,274-OE2-276-H       |
| 1015,268,OE2,264,HZ2,268-OE2-264-HZ2   | 1055,274,OE1,275,HZ3,274-OE1-275-HZ3   |
| 1016,268,OE2,267,HZ2,268-OE2-267-HZ2   | 1056,274,O,277,H,274-O-277-H           |
| 1017,268,OE2,205,HH21,268-OE2-205-HH21 | 1057,274,OE1,276,H,274-OE1-276-H       |
| 1018,268,OE1,205,HE,268-OE1-205-HE     | 1058,274,OE2,277,HE2,274-OE2-277-HE2   |
| 1019,268,O,205,HH22,268-O-205-HH22     | 1059,274,OE2,275,H,274-OE2-275-H       |
| 1020,268,OE2,207,HH,268-OE2-207-HH     | 1060,274,OE1,279,HH22,274-OE1-279-HH22 |
| 1021,268,OE2,264,HZ3,268-OE2-264-HZ3   | 1061,274,OE2,275,HZ1,274-OE2-275-HZ1   |
| 1022,268,OE2,271,HZ3,268-OE2-271-HZ3   | 1062,274,OE1,277,HE2,274-OE1-277-HE2   |
| 1023,268,OE1,264,HZ1,268-OE1-264-HZ1   | 1063,274,OE1,275,H,274-OE1-275-H       |
| 1024,268,O,271,H,268-O-271-H           | 1064,274,OE2,275,HZ3,274-OE2-275-HZ3   |
| 1025,268,OE1,264,HZ2,268-OE1-264-HZ2   | 1065,275,O,277,H,275-O-277-H           |
| 1026,268,OE2,264,HZ1,268-OE2-264-HZ1   | 1066,276,O,278,H,276-O-278-H           |
| 1027,268,O,205,HH21,268-O-205-HH21     | 1067,277,O,279,HH21,277-O-279-HH21     |
| 1028,268,O,272,HG1,268-O-272-HG1       | 1068,277,ND1,279,HH21,277-ND1-279-HH21 |
| 1029,269,O,272,H,269-O-272-H           | 1069,277,O,279,HE,277-O-279-HE         |
| 1030,269,O,279,HH22,269-O-279-HH22     | 1070,277,ND1,278,H,277-ND1-278-H       |
| 1031,269,O,273,H,269-O-273-H           | 1071,277,ND1,279,HH11,277-ND1-279-HH11 |
| 1032,269,O,279,HH12,269-O-279-HH12     | 1072,278,O,279,HE,278-O-279-HE         |
| 1033,269,ND1,205,HH21,269-ND1-205-HH21 | 1073,280,OD2,282,HG1,280-OD2-282-HG1   |
| 1034,269,O,272,HG1,269-O-272-HG1       | 1074,280,O,284,H,280-O-284-H           |
| 1035,269,ND1,205,HH12,269-ND1-205-HH12 | 1075,280,OD1,269,HE2,280-OD1-269-HE2   |
| 1036,270,O,273,H,270-O-273-H           | 1076,280,OD1,283,H,280-OD1-283-H       |
| 1037,270,OH,290,HE21,270-OH-290-HE21   | 1077,280,OD1,282,HG1,280-OD1-282-HG1   |
| 1038,270,OH,271,HZ2,270-OH-271-HZ2     | 1078,280,OD1,282,H,280-OD1-282-H       |
| 1039,270,OH,290,HE22,270-OH-290-HE22   | 1079,280,O,283,H,280-O-283-H           |
| 1040,271,O,273,H,271-O-273-H           | 1080,280,OD2,269,HE2,280-OD2-269-HE2   |
| 1041,272,O,274,H,272-O-274-H           | 1081,280,O,284,HG,280-O-284-HG         |
| 1042,272,OG1,205,HH22,272-OG1-205-HH22 | 1082,281,O,284,HG,281-O-284-HG         |
| 1043,272,O,279,HH22,272-O-279-HH22     | 1083,281,O,284,H,281-O-284-H           |
| 1044,272,OG1,205,HH21,272-OG1-205-HH21 | 1084,281,O,285,H,281-O-285-H           |
| 1045,272,O,272,HG1,272-O-272-HG1       | 1085,282,O,285,H,282-O-285-H           |

1086,282,O,286,H,282-O-286-H  
1087,283,OD2,279,HH21,283-OD2-279-HH21  
1088,283,OD1,278,H,283-OD1-278-H  
1089,283,OD1,279,H,283-OD1-279-H  
1090,283,OD1,279,HH21,283-OD1-279-HH21  
1091,283,OD2,278,H,283-OD2-278-H  
1092,283,OD2,279,HE,283-OD2-279-HE  
1093,283,OD1,279,HE,283-OD1-279-HE  
1094,283,O,287,H,283-O-287-H  
1095,283,OD2,279,H,283-OD2-279-H  
1096,283,OD1,269,HE2,283-OD1-269-HE2  
1097,284,O,288,H,284-O-288-H  
1098,285,O,289,H,285-O-289-H  
1099,285,O,288,H,285-O-288-H  
1100,286,O,289,H,286-O-289-H  
1101,286,O,290,HE21,286-O-290-HE21  
1102,286,O,290,H,286-O-290-H  
1103,286,O,290,HE22,286-O-290-HE22  
1104,287,OE1,275,HZ2,287-OE1-275-HZ2  
1105,287,OE2,275,HZ3,287-OE2-275-HZ3  
1106,287,OE2,290,HE21,287-OE2-290-HE21  
1107,287,OE1,290,HE21,287-OE1-290-HE21  
1108,287,OE1,275,HZ3,287-OE1-275-HZ3  
1109,287,OE2,275,HZ2,287-OE2-275-HZ2  
1110,287,OE2,290,HE22,287-OE2-290-HE22  
1111,287,O,291,H,287-O-291-H  
1112,287,O,290,H,287-O-290-H  
1113,287,O,290,HE21,287-O-290-HE21  
1114,287,OE2,276,H,287-OE2-276-H  
1115,287,OE1,290,HE22,287-OE1-290-HE22  
1116,287,OE1,275,HZ1,287-OE1-275-HZ1  
1117,287,OE1,276,H,287-OE1-276-H  
1118,287,OE2,275,HZ1,287-OE2-275-HZ1  
1119,288,O,291,H,288-O-291-H  
1120,288,O,292,H,288-O-292-H  
1121,289,O,293,HE21,289-O-293-HE21  
1122,289,O,292,H,289-O-292-H  
1123,289,O,293,H,289-O-293-H  
1124,289,O,292,HZ1,289-O-292-HZ1  
1125,289,O,292,HZ3,289-O-292-HZ3  
1126,289,O,292,HZ2,289-O-292-HZ2  
1127,289,O,293,HE22,289-O-293-HE22  
1128,290,O,275,HZ3,290-O-275-HZ3  
1129,290,O,293,HE22,290-O-293-HE22  
1130,290,O,290,HE21,290-O-290-HE21  
1131,290,O,294,H,290-O-294-H  
1132,290,OE1,293,HE22,290-OE1-293-HE22  
1133,290,OE1,275,HZ1,290-OE1-275-HZ1  
1134,290,OE1,275,HZ3,290-OE1-275-HZ3  
1135,290,OE1,275,HZ2,290-OE1-275-HZ2  
1136,290,OE1,270,HH,290-OE1-270-HH  
1137,290,O,293,HE21,290-O-293-HE21  
1138,290,O,293,H,290-O-293-H  
1139,290,O,292,H,290-O-292-H  
1140,291,O,295,H,291-O-295-H  
1141,291,OE1,293,HE22,291-OE1-293-HE22  
1142,291,OE1,288,HE2,291-OE1-288-HE2  
1143,291,OE1,290,HE21,291-OE1-290-HE21  
1144,291,OE1,290,HE22,291-OE1-290-HE22  
1145,291,OE2,290,HE21,291-OE2-290-HE21  
1146,291,OE2,293,HE21,291-OE2-293-HE21  
1147,291,OE1,275,HZ1,291-OE1-275-HZ1  
1148,291,OE1,275,HZ3,291-OE1-275-HZ3  
1149,291,O,294,H,291-O-294-H  
1150,291,OE2,275,HZ3,291-OE2-275-HZ3  
1151,291,OE2,293,HE22,291-OE2-293-HE22  
1152,291,OE1,275,HZ2,291-OE1-275-HZ2  
1153,291,OE2,275,HZ1,291-OE2-275-HZ1  
1154,291,O,293,H,291-O-293-H  
1155,291,OE2,275,HZ2,291-OE2-275-HZ2  
1156,292,O,297,HD22,292-O-297-HD22  
1157,292,O,295,H,292-O-295-H  
1158,292,O,299,H,292-O-299-H  
1159,293,O,293,HE21,293-O-293-HE21  
1160,293,OE1,292,HZ2,293-OE1-292-HZ2  
1161,293,OE1,292,HZ1,293-OE1-292-HZ1  
1162,293,OE1,292,HZ3,293-OE1-292-HZ3  
1163,293,OE1,293,H,293-OE1-293-H  
1164,293,OE1,290,HE21,293-OE1-290-HE21  
1165,293,O,295,H,293-O-295-H

1166,293,NE2,293,H,293-NE2-293-H  
1167,294,O,288,HE2,294-O-288-HE2  
1168,294,O,296,H,294-O-296-H  
1169,295,OD2,136,HH21,295-OD2-136-HH21  
1170,295,OD1,136,HH21,295-OD1-136-HH21  
1171,295,OD2,297,HD21,295-OD2-297-HD21  
1172,295,OD2,134,HH22,295-OD2-134-HH22  
1173,295,OD1,299,H,295-OD1-299-H  
1174,295,OD2,297,HD22,295-OD2-297-HD22  
1175,295,OD1,297,H,295-OD1-297-H  
1176,295,O,298,H,295-O-298-H  
1177,295,OD2,297,H,295-OD2-297-H  
1178,295,OD1,288,HE2,295-OD1-288-HE2  
1179,295,OD1,299,HD22,295-OD1-299-HD22  
1180,295,OD1,134,HH12,295-OD1-134-HH12  
1181,295,OD1,296,H,295-OD1-296-H  
1182,295,OD1,298,H,295-OD1-298-H  
1183,295,OD2,134,HH12,295-OD2-134-HH12  
1184,295,OD1,136,HH22,295-OD1-136-HH22  
1185,295,OD1,134,HH22,295-OD1-134-HH22  
1186,295,OD2,296,H,295-OD2-296-H  
1187,295,OD2,299,HD22,295-OD2-299-HD22  
1188,295,OD2,288,HE2,295-OD2-288-HE2  
1189,295,OD2,134,HH21,295-OD2-134-HH21  
1190,295,OD2,299,H,295-OD2-299-H  
1191,295,OD1,297,HD21,295-OD1-297-HD21  
1192,295,OD2,298,H,295-OD2-298-H  
1193,296,OE1,136,HH21,296-OE1-136-HH21  
1194,296,OE1,136,HE,296-OE1-136-HE  
1195,296,OE2,297,HD21,296-OE2-297-HD21  
1196,296,OE2,136,HH12,296-OE2-136-HH12  
1197,296,OE1,136,HH11,296-OE1-136-HH11  
1198,296,OE1,136,HH22,296-OE1-136-HH22  
1199,296,OE2,136,HE,296-OE2-136-HE  
1200,296,OE2,136,HH11,296-OE2-136-HH11  
1201,296,OE2,297,HD22,296-OE2-297-HD22  
1202,296,OE1,136,HH12,296-OE1-136-HH12  
1203,296,OE2,296,H,296-OE2-296-H  
1204,296,OE2,136,HH22,296-OE2-136-HH22  
1205,296,O,136,HH22,296-O-136-HH22  
1206,296,OE2,134,HE,296-OE2-134-HE  
1207,296,O,299,HD21,296-O-299-HD21  
1208,296,OE1,297,HD22,296-OE1-297-HD22  
1209,296,O,136,HH12,296-O-136-HH12  
1210,296,OE2,134,HH21,296-OE2-134-HH21  
1211,296,OE2,297,H,296-OE2-297-H  
1212,296,O,298,H,296-O-298-H  
1213,296,OE1,296,H,296-OE1-296-H  
1214,296,OE2,136,HH21,296-OE2-136-HH21  
1215,297,OD1,136,HE,297-OD1-136-HE  
1216,297,OD1,299,H,297-OD1-299-H  
1217,297,OD1,134,HH21,297-OD1-134-HH21  
1218,297,OD1,140,HD22,297-OD1-140-HD22  
1219,297,O,136,HH22,297-O-136-HH22  
1220,297,OD1,299,HD22,297-OD1-299-HD22  
1221,297,OD1,140,HD21,297-OD1-140-HD21  
1222,297,OD1,136,HH11,297-OD1-136-HH11  
1223,297,O,299,HD22,297-O-299-HD22  
1224,297,OD1,136,HH21,297-OD1-136-HH21  
1225,297,O,297,HD21,297-O-297-HD21  
1226,297,OD1,299,HD21,297-OD1-299-HD21  
1227,297,OD1,136,HH22,297-OD1-136-HH22  
1228,297,OD1,136,HH12,297-OD1-136-HH12  
1229,297,OD1,134,HH11,297-OD1-134-HH11  
1230,297,O,299,H,297-O-299-H  
1231,297,O,136,HH21,297-O-136-HH21  
1232,298,O,301,HE22,298-O-301-HE22  
1233,298,O,300,H,298-O-300-H  
1234,299,OD1,300,H,299-OD1-300-H  
1235,299,OD1,134,HH21,299-OD1-134-HH21  
1236,299,O,302,H,299-O-302-H  
1237,299,OD1,302,H,299-OD1-302-H  
1238,299,O,299,HD22,299-O-299-HD22  
1239,299,O,292,HZ1,299-O-292-HZ1  
1240,299,OD1,301,HE21,299-OD1-301-HE21  
1241,299,O,292,HZ3,299-O-292-HZ3  
1242,299,OD1,297,HD21,299-OD1-297-HD21  
1243,299,ND2,301,HE22,299-ND2-301-HE22  
1244,299,OD1,301,HE22,299-OD1-301-HE22  
1245,299,O,301,H,299-O-301-H

|                                        |                                        |
|----------------------------------------|----------------------------------------|
| 1246,299,O,292,HZ2,299-O-292-HZ2       | 1286,304,OD1,292,HZ1,304-OD1-292-HZ1   |
| 1247,299,OD1,301,H,299-OD1-301-H       | 1287,304,OD2,270,HH,304-OD2-270-HH     |
| 1248,300,O,302,H,300-O-302-H           | 1288,304,OD1,292,HZ2,304-OD1-292-HZ2   |
| 1249,300,O,292,HZ2,300-O-292-HZ2       | 1289,305,OE1,309,HD21,305-OE1-309-HD21 |
| 1250,300,O,292,HZ1,300-O-292-HZ1       | 1290,305,OE1,306,H,305-OE1-306-H       |
| 1251,300,O,292,HZ3,300-O-292-HZ3       | 1291,305,OE1,309,HD22,305-OE1-309-HD22 |
| 1252,300,O,301,HE21,300-O-301-HE21     | 1292,305,OE1,306,HZ2,305-OE1-306-HZ2   |
| 1253,301,O,306,HZ2,301-O-306-HZ2       | 1293,305,OE2,117,HD21,305-OE2-117-HD21 |
| 1254,301,OE1,300,H,301-OE1-300-H       | 1294,305,OE2,119,HE22,305-OE2-119-HE22 |
| 1255,301,OE1,306,HZ3,301-OE1-306-HZ3   | 1295,305,OE2,303,HG,305-OE2-303-HG     |
| 1256,301,OE1,299,HD22,301-OE1-299-HD22 | 1296,305,OE2,305,H,305-OE2-305-H       |
| 1257,301,O,306,HZ1,301-O-306-HZ1       | 1297,305,OE2,309,HD21,305-OE2-309-HD21 |
| 1258,301,OE1,306,HZ2,301-OE1-306-HZ2   | 1298,305,OE2,259,HH,305-OE2-259-HH     |
| 1259,301,O,306,HZ3,301-O-306-HZ3       | 1299,305,OE1,119,HE21,305-OE1-119-HE21 |
| 1260,301,OE1,301,H,301-OE1-301-H       | 1300,305,OE2,306,HZ3,305-OE2-306-HZ3   |
| 1261,301,O,303,H,301-O-303-H           | 1301,305,OE1,119,HE22,305-OE1-119-HE22 |
| 1262,301,OE1,299,HD21,301-OE1-299-HD21 | 1302,305,OE1,303,HG,305-OE1-303-HG     |
| 1263,301,O,299,HD21,301-O-299-HD21     | 1303,305,OE1,259,HH,305-OE1-259-HH     |
| 1264,302,O,292,HZ1,302-O-292-HZ1       | 1304,305,OE2,263,HE21,305-OE2-263-HE21 |
| 1265,302,O,292,HZ3,302-O-292-HZ3       | 1305,305,OE1,306,HZ1,305-OE1-306-HZ1   |
| 1266,302,O,292,HZ2,302-O-292-HZ2       | 1306,305,OE1,305,H,305-OE1-305-H       |
| 1267,303,OG,306,HZ1,303-OG-306-HZ1     | 1307,305,OE1,263,HE21,305-OE1-263-HE21 |
| 1268,303,O,306,H,303-O-306-H           | 1308,305,O,308,H,305-O-308-H           |
| 1269,303,OG,305,H,303-OG-305-H         | 1309,305,OE1,267,HZ2,305-OE1-267-HZ2   |
| 1270,303,O,307,H,303-O-307-H           | 1310,305,O,119,HE21,305-O-119-HE21     |
| 1271,303,OG,306,HZ2,303-OG-306-HZ2     | 1311,305,OE1,117,HD21,305-OE1-117-HD21 |
| 1272,303,OG,306,H,303-OG-306-H         | 1312,305,O,117,HD22,305-O-117-HD22     |
| 1273,303,OG,306,HZ3,303-OG-306-HZ3     | 1313,305,OE2,309,HD22,305-OE2-309-HD22 |
| 1274,304,OD2,292,HZ2,304-OD2-292-HZ2   | 1314,305,OE2,306,H,305-OE2-306-H       |
| 1275,304,OD1,304,H,304-OD1-304-H       | 1315,305,O,119,HE22,305-O-119-HE22     |
| 1276,304,O,308,H,304-O-308-H           | 1316,305,OE1,117,HD22,305-OE1-117-HD22 |
| 1277,304,OD1,292,HZ3,304-OD1-292-HZ3   | 1317,305,OE2,306,HZ1,305-OE2-306-HZ1   |
| 1278,304,OD2,304,H,304-OD2-304-H       | 1318,305,OE1,306,HZ3,305-OE1-306-HZ3   |
| 1279,304,OD2,305,H,304-OD2-305-H       | 1319,305,OE2,263,HE22,305-OE2-263-HE22 |
| 1280,304,OD1,293,HE21,304-OD1-293-HE21 | 1320,305,O,309,H,305-O-309-H           |
| 1281,304,O,307,H,304-O-307-H           | 1321,305,OE1,263,HE22,305-OE1-263-HE22 |
| 1282,304,OD1,305,H,304-OD1-305-H       | 1322,305,O,309,HD22,305-O-309-HD22     |
| 1283,304,OD1,270,HH,304-OD1-270-HH     | 1323,305,OE2,117,HD22,305-OE2-117-HD22 |
| 1284,304,OD2,292,HZ3,304-OD2-292-HZ3   | 1324,305,OE2,306,HZ2,305-OE2-306-HZ2   |
| 1285,304,OD2,292,HZ1,304-OD2-292-HZ1   | 1325,306,O,134,HE,306-O-134-HE         |



|                                        |                                        |
|----------------------------------------|----------------------------------------|
| 1326,306,O,134,HH21,306-O-134-HH21     | 1366,313,OD2,134,HH22,313-OD2-134-HH22 |
| 1327,306,O,309,H,306-O-309-H           | 1367,313,OD2,134,HH12,313-OD2-134-HH12 |
| 1328,306,O,134,HH22,306-O-134-HH22     | 1368,313,OD1,120,HG,313-OD1-120-HG     |
| 1329,306,O,134,HH12,306-O-134-HH12     | 1369,313,OD1,116,HG,313-OD1-116-HG     |
| 1330,306,O,119,HE22,306-O-119-HE22     | 1370,313,OD2,516,H10,313-OD2-516-H10   |
| 1331,307,O,310,H,307-O-310-H           | 1371,313,OD1,309,HD21,313-OD1-309-HD21 |
| 1332,308,O,310,H,308-O-310-H           | 1372,313,O,316,H,313-O-316-H           |
| 1333,308,O,311,H,308-O-311-H           | 1373,313,OD2,120,HG,313-OD2-120-HG     |
| 1334,309,OD1,263,HE21,309-OD1-263-HE21 | 1374,313,OD1,121,H,313-OD1-121-H       |
| 1335,309,OD1,263,HE22,309-OD1-263-HE22 | 1375,314,O,317,H,314-O-317-H           |
| 1336,309,OD1,117,HD22,309-OD1-117-HD22 | 1376,314,O,318,H,314-O-318-H           |
| 1337,309,OD1,134,HH22,309-OD1-134-HH22 | 1377,315,O,318,H,315-O-318-H           |
| 1338,309,OD1,134,HH21,309-OD1-134-HH21 | 1378,315,O,319,H,315-O-319-H           |
| 1339,309,ND2,119,HE22,309-ND2-119-HE22 | 1379,316,O,516,H17,316-O-516-H17       |
| 1340,309,O,312,H,309-O-312-H           | 1380,317,O,321,H,317-O-321-H           |
| 1341,309,OD1,119,HE22,309-OD1-119-HE22 | 1381,317,O,320,H,317-O-320-H           |
| 1342,309,OD1,259,HH,309-OD1-259-HH     | 1382,317,O,321,HG1,317-O-321-HG1       |
| 1343,309,O,313,H,309-O-313-H           | 1383,318,O,321,HG1,318-O-321-HG1       |
| 1344,309,OD1,121,H,309-OD1-121-H       | 1384,318,O,321,H,318-O-321-H           |
| 1345,309,OD1,134,HE,309-OD1-134-HE     | 1385,318,O,322,H,318-O-322-H           |
| 1346,309,O,309,HD22,309-O-309-HD22     | 1386,319,O,323,H,319-O-323-H           |
| 1347,309,OD1,134,HH12,309-OD1-134-HH12 | 1387,319,O,323,HG1,319-O-323-HG1       |
| 1348,310,O,314,H,310-O-314-H           | 1388,320,OD1,499,HZ3,320-OD1-499-HZ3   |
| 1349,310,N,134,HH21,310-N-134-HH21     | 1389,320,O,324,HG1,320-O-324-HG1       |
| 1350,310,O,313,H,310-O-313-H           | 1390,320,OD1,499,HZ2,320-OD1-499-HZ2   |
| 1351,311,O,315,H,311-O-315-H           | 1391,320,OD2,499,HZ2,320-OD2-499-HZ2   |
| 1352,311,O,314,H,311-O-314-H           | 1392,320,OD1,499,HZ1,320-OD1-499-HZ1   |
| 1353,312,O,516,H10,312-O-516-H10       | 1393,320,O,323,H,320-O-323-H           |
| 1354,312,O,316,H,312-O-316-H           | 1394,320,OD1,187,HH,320-OD1-187-HH     |
| 1355,313,OD1,134,HH12,313-OD1-134-HH12 | 1395,320,OD2,499,HZ1,320-OD2-499-HZ1   |
| 1356,313,OD2,122,HG,313-OD2-122-HG     | 1396,320,OD2,187,HH,320-OD2-187-HH     |
| 1357,313,OD1,516,H10,313-OD1-516-H10   | 1397,320,OD1,497,HG1,320-OD1-497-HG1   |
| 1358,313,OD1,122,H,313-OD1-122-H       | 1398,320,OD2,499,HZ3,320-OD2-499-HZ3   |
| 1359,313,OD1,309,HD22,313-OD1-309-HD22 | 1399,320,OD2,497,HG1,320-OD2-497-HG1   |
| 1360,313,OD2,122,H,313-OD2-122-H       | 1400,320,O,324,H,320-O-324-H           |
| 1361,313,OD1,134,HH22,313-OD1-134-HH22 | 1401,320,OD2,219,HD21,320-OD2-219-HD21 |
| 1362,313,O,317,H,313-O-317-H           | 1402,321,OG1,322,H,321-OG1-322-H       |
| 1363,313,OD2,116,HG,313-OD2-116-HG     | 1403,321,O,325,H,321-O-325-H           |
| 1364,313,OD1,122,HG,313-OD1-122-HG     | 1404,321,O,324,H,321-O-324-H           |
| 1365,313,OD2,121,H,313-OD2-121-H       | 1405,322,O,326,H,322-O-326-H           |

1406,322,O,325,H,322-O-325-H  
1407,323,O,326,H,323-O-326-H  
1408,323,O,327,HG,323-O-327-HG  
1409,323,O,327,H,323-O-327-H  
1410,324,OG1,499,HZ2,324-OG1-499-HZ2  
1411,324,O,327,HG,324-O-327-HG  
1412,324,OG1,499,HZ1,324-OG1-499-HZ1  
1413,324,OG1,497,HG1,324-OG1-497-HG1  
1414,324,OG1,499,HZ3,324-OG1-499-HZ3  
1415,324,O,328,H,324-O-328-H  
1416,325,O,329,H,325-O-329-H  
1417,325,O,329,HG,325-O-329-HG  
1418,326,O,330,H,326-O-330-H  
1419,326,O,329,HG,326-O-329-HG  
1420,326,O,329,H,326-O-329-H  
1421,327,O,331,H,327-O-331-H  
1422,328,O,332,H,328-O-332-H  
1423,328,O,331,H,328-O-331-H  
1424,329,O,333,H,329-O-333-H  
1425,330,O,334,H,330-O-334-H  
1426,330,O,333,H,330-O-333-H  
1427,331,O,334,H,331-O-334-H  
1428,331,O,335,H,331-O-335-H  
1429,332,O,335,H,332-O-335-H  
1430,332,O,336,HD22,332-O-336-HD22  
1431,332,O,336,H,332-O-336-H  
1432,333,O,340,HE21,333-O-340-HE21  
1433,333,O,336,H,333-O-336-H  
1434,335,O,336,HD22,335-O-336-HD22  
1435,336,OD1,339,H,336-OD1-339-H  
1436,336,OD1,338,HE,336-OD1-338-HE  
1437,336,O,340,H,336-O-340-H  
1438,336,OD1,338,H,336-OD1-338-H  
1439,336,O,339,H,336-O-339-H  
1440,337,O,340,H,337-O-340-H  
1441,337,O,341,H,337-O-341-H  
1442,338,O,342,H,338-O-342-H  
1443,339,O,343,H,339-O-343-H  
1444,340,OE1,480,H,340-OE1-480-H  
1445,340,OE1,344,HE22,340-OE1-344-HE22  
1446,340,OE1,344,HE21,340-OE1-344-HE21  
1447,340,O,344,H,340-O-344-H  
1448,340,O,343,H,340-O-343-H  
1449,341,O,344,H,341-O-344-H  
1450,341,O,341,HH11,341-O-341-HH11  
1451,341,O,345,H,341-O-345-H  
1452,342,O,346,H,342-O-346-H  
1453,342,O,342,HZ3,342-O-342-HZ3  
1454,342,O,342,HZ2,342-O-342-HZ2  
1455,342,O,345,H,342-O-345-H  
1456,343,O,346,H,343-O-346-H  
1457,343,O,347,H,343-O-347-H  
1458,344,O,511,HH22,344-O-511-HH22  
1459,344,OE1,341,HH21,344-OE1-341-HH21  
1460,344,O,348,H,344-O-348-H  
1461,344,OE1,341,HH11,344-OE1-341-HH11  
1462,344,OE1,341,HE,344-OE1-341-HE  
1463,344,O,511,HH12,344-O-511-HH12  
1464,344,OE1,341,HH12,344-OE1-341-HH12  
1465,345,OE2,341,HE,345-OE2-341-HE  
1466,345,OE2,341,HH22,345-OE2-341-HH22  
1467,345,O,349,H,345-O-349-H  
1468,345,OE1,341,HH22,345-OE1-341-HH22  
1469,345,OE1,342,HZ3,345-OE1-342-HZ3  
1470,345,OE2,341,HH12,345-OE2-341-HH12  
1471,345,OE2,342,HZ2,345-OE2-342-HZ2  
1472,345,OE1,342,HZ1,345-OE1-342-HZ1  
1473,345,OE1,342,HZ2,345-OE1-342-HZ2  
1474,345,OE2,342,HZ1,345-OE2-342-HZ1  
1475,345,OE2,341,HH21,345-OE2-341-HH21  
1476,345,O,349,HG1,345-O-349-HG1  
1477,345,OE1,341,HH21,345-OE1-341-HH21  
1478,345,OE2,342,HZ3,345-OE2-342-HZ3  
1479,345,OE1,341,HE,345-OE1-341-HE  
1480,345,OE1,341,HH12,345-OE1-341-HH12  
1481,346,O,350,H,346-O-350-H  
1482,346,O,349,H,346-O-349-H  
1483,346,OE2,342,HZ1,346-OE2-342-HZ1  
1484,346,OE2,342,HZ3,346-OE2-342-HZ3  
1485,346,OE1,342,HZ3,346-OE1-342-HZ3

|                                        |                                        |
|----------------------------------------|----------------------------------------|
| 1486,346,OE1,342,HZ1,346-OE1-342-HZ1   | 1526,361,OD1,358,HH21,361-OD1-358-HH21 |
| 1487,346,OE2,342,HZ2,346-OE2-342-HZ2   | 1527,361,OD1,355,HH12,361-OD1-355-HH12 |
| 1488,346,OE1,342,HZ2,346-OE1-342-HZ2   | 1528,361,OD2,355,HH22,361-OD2-355-HH22 |
| 1489,346,OE1,367,H,346-OE1-367-H       | 1529,361,OD1,364,HE2,361-OD1-364-HE2   |
| 1490,347,O,351,H,347-O-351-H           | 1530,361,OD2,358,HE,361-OD2-358-HE     |
| 1491,347,O,352,H,347-O-352-H           | 1531,361,OD2,355,HH12,361-OD2-355-HH12 |
| 1492,347,O,350,H,347-O-350-H           | 1532,362,NH1,465,HE1,362-NH1-465-HE1   |
| 1493,348,OD1,353,HE,348-OD1-353-HE     | 1533,362,O,365,H,362-O-365-H           |
| 1494,348,OD2,353,HH21,348-OD2-353-HH21 | 1534,364,NE2,363,HG,364-NE2-363-HG     |
| 1495,348,OD2,511,HH12,348-OD2-511-HH12 | 1535,364,ND1,363,HG,364-ND1-363-HG     |
| 1496,348,OD1,353,HH21,348-OD1-353-HH21 | 1536,365,O,368,H,365-O-368-H           |
| 1497,348,OD2,353,HE,348-OD2-353-HE     | 1537,365,O,369,H,365-O-369-H           |
| 1498,348,OD2,511,HH22,348-OD2-511-HH22 | 1538,366,O,370,H,366-O-370-H           |
| 1499,348,OD1,511,HH12,348-OD1-511-HH12 | 1539,366,O,369,H,366-O-369-H           |
| 1500,348,OD1,476,HE22,348-OD1-476-HE22 | 1540,367,O,371,H,367-O-371-H           |
| 1501,348,OD1,511,HH22,348-OD1-511-HH22 | 1541,367,O,370,H,367-O-370-H           |
| 1502,350,O,355,HH21,350-O-355-HH21     | 1542,368,O,372,H,368-O-372-H           |
| 1503,351,O,354,HG,351-O-354-HG         | 1543,368,O,371,H,368-O-371-H           |
| 1504,352,O,476,HE21,352-O-476-HE21     | 1544,369,OE1,362,HE,369-OE1-362-HE     |
| 1505,352,O,476,HE22,352-O-476-HE22     | 1545,369,OE1,464,HH21,369-OE1-464-HH21 |
| 1506,353,O,477,HH22,353-O-477-HH22     | 1546,369,OE2,362,HH12,369-OE2-362-HH12 |
| 1507,353,O,477,HH12,353-O-477-HH12     | 1547,369,O,372,H,369-O-372-H           |
| 1508,354,O,354,HG,354-O-354-HG         | 1548,369,OE1,464,HE,369-OE1-464-HE     |
| 1509,355,O,476,HE21,355-O-476-HE21     | 1549,369,OE1,362,HH21,369-OE1-362-HH21 |
| 1510,355,O,476,HE22,355-O-476-HE22     | 1550,369,OE2,362,HE,369-OE2-362-HE     |
| 1511,356,O,355,HH11,356-O-355-HH11     | 1551,369,OE2,464,HE,369-OE2-464-HE     |
| 1512,357,O,356,HH11,357-O-356-HH11     | 1552,369,OE2,464,HH21,369-OE2-464-HH21 |
| 1513,358,O,361,H,358-O-361-H           | 1553,369,OE2,362,HH22,369-OE2-362-HH22 |
| 1514,359,O,465,HE1,359-O-465-HE1       | 1554,369,O,373,H,369-O-373-H           |
| 1515,359,O,362,HH11,359-O-362-HH11     | 1555,369,OE2,362,HH21,369-OE2-362-HH21 |
| 1516,359,O,362,H,359-O-362-H           | 1556,369,OE1,362,HH12,369-OE1-362-HH12 |
| 1517,360,O,363,H,360-O-363-H           | 1557,370,O,373,H,370-O-373-H           |
| 1518,360,OG,358,HE,360-OG-358-HE       | 1558,370,O,374,H,370-O-374-H           |
| 1519,360,O,363,HG,360-O-363-HG         | 1559,371,O,375,H,371-O-375-H           |
| 1520,361,O,364,H,361-O-364-H           | 1560,371,O,375,HG1,371-O-375-HG1       |
| 1521,361,OD1,358,HE,361-OD1-358-HE     | 1561,372,O,376,H,372-O-376-H           |
| 1522,361,OD2,358,H,361-OD2-358-H       | 1562,373,O,377,H,373-O-377-H           |
| 1523,361,OD1,355,HH22,361-OD1-355-HH22 | 1563,374,OE1,431,HH22,374-OE1-431-HH22 |
| 1524,361,O,365,H,361-O-365-H           | 1564,374,OE2,377,HH21,374-OE2-377-HH21 |
| 1525,361,OD1,360,HG,361-OD1-360-HG     | 1565,374,O,378,H,374-O-378-H           |

|                                        |                                        |
|----------------------------------------|----------------------------------------|
| 1566,374,OE2,431,HH22,374-OE2-431-HH22 | 1606,389,O,391,HG1,389-O-391-HG1       |
| 1567,374,OE2,431,HH11,374-OE2-431-HH11 | 1607,390,OG1,404,H,390-OG1-404-H       |
| 1568,374,OE2,377,HE,374-OE2-377-HE     | 1608,390,O,389,HG,390-O-389-HG         |
| 1569,374,OE2,431,HH12,374-OE2-431-HH12 | 1609,390,O,404,H,390-O-404-H           |
| 1570,374,OE2,428,H,374-OE2-428-H       | 1610,390,OG1,405,H,390-OG1-405-H       |
| 1571,374,OE1,431,HH11,374-OE1-431-HH11 | 1611,391,OG1,104,HZ1,391-OG1-104-HZ1   |
| 1572,374,OE1,428,H,374-OE1-428-H       | 1612,391,O,403,HZ3,391-O-403-HZ3       |
| 1573,374,OE1,377,HE,374-OE1-377-HE     | 1613,391,OG1,104,HZ2,391-OG1-104-HZ2   |
| 1574,374,OE1,431,HH12,374-OE1-431-HH12 | 1614,391,OG1,104,H,391-OG1-104-H       |
| 1575,374,OE1,377,HH21,374-OE1-377-HH21 | 1615,391,O,403,HZ2,391-O-403-HZ2       |
| 1576,375,O,379,H,375-O-379-H           | 1616,391,OG1,104,HZ3,391-OG1-104-HZ3   |
| 1577,375,O,379,HG,375-O-379-HG         | 1617,391,OG1,105,H,391-OG1-105-H       |
| 1578,375,OG1,329,HG,375-OG1-329-HG     | 1618,391,O,403,HZ1,391-O-403-HZ1       |
| 1579,376,O,380,H,376-O-380-H           | 1619,393,OD2,393,H,393-OD2-393-H       |
| 1580,377,O,380,HG,377-O-380-HG         | 1620,393,OD1,400,HH,393-OD1-400-HH     |
| 1581,377,O,416,HE2,377-O-416-HE2       | 1621,393,OD1,392,HH21,393-OD1-392-HH21 |
| 1582,377,O,380,H,377-O-380-H           | 1622,393,OD2,403,HZ3,393-OD2-403-HZ3   |
| 1583,378,ND1,332,HH,378-ND1-332-HH     | 1623,393,OD2,400,HH,393-OD2-400-HH     |
| 1584,378,O,416,HE2,378-O-416-HE2       | 1624,393,OD2,403,H,393-OD2-403-H       |
| 1585,379,OG,381,H,379-OG-381-H         | 1625,393,OD1,403,HZ1,393-OD1-403-HZ1   |
| 1586,379,O,412,HE1,379-O-412-HE1       | 1626,393,OD1,403,HZ3,393-OD1-403-HZ3   |
| 1587,380,OG,415,HD22,380-OG-415-HD22   | 1627,393,O,392,HE,393-O-392-HE         |
| 1588,380,O,382,H,380-O-382-H           | 1628,393,O,392,HH21,393-O-392-HH21     |
| 1589,380,O,380,HG,380-O-380-HG         | 1629,393,OD1,403,H,393-OD1-403-H       |
| 1590,380,OG,416,HE2,380-OG-416-HE2     | 1630,393,OD2,403,HZ1,393-OD2-403-HZ1   |
| 1591,381,O,498,H,381-O-498-H           | 1631,393,OD1,393,H,393-OD1-393-H       |
| 1592,382,O,411,HE21,382-O-411-HE21     | 1632,393,OD1,403,HZ2,393-OD1-403-HZ2   |
| 1593,383,O,412,H,383-O-412-H           | 1633,393,OD2,392,HH21,393-OD2-392-HH21 |
| 1594,383,O,411,H,383-O-411-H           | 1634,393,OD2,403,HZ2,393-OD2-403-HZ2   |
| 1595,384,O,230,HG,384-O-230-HG         | 1635,394,OG1,99,HE22,394-OG1-99-HE22   |
| 1596,385,O,230,HG,385-O-230-HG         | 1636,394,O,395,HG,394-O-395-HG         |
| 1597,386,O,385,HG1,386-O-385-HG1       | 1637,394,OG1,395,H,394-OG1-395-H       |
| 1598,386,O,106,HH11,386-O-106-HH11     | 1638,394,OG1,99,HE21,394-OG1-99-HE21   |
| 1599,386,O,106,HH12,386-O-106-HH12     | 1639,394,O,401,H,394-O-401-H           |
| 1600,387,O,106,HH11,387-O-106-HH11     | 1640,395,O,99,HE21,395-O-99-HE21       |
| 1601,388,O,407,H,388-O-407-H           | 1641,395,O,99,HE22,395-O-99-HE22       |
| 1602,388,NE2,385,HG1,388-NE2-385-HG1   | 1642,396,O,398,H,396-O-398-H           |
| 1603,388,O,389,HG,388-O-389-HG         | 1643,396,O,399,H,396-O-399-H           |
| 1604,389,O,105,H,389-O-105-H           | 1644,397,O,38,HZ1,397-O-38-HZ1         |
| 1605,389,O,391,H,389-O-391-H           | 1645,397,O,38,HZ2,397-O-38-HZ2         |

|                                      |                                        |
|--------------------------------------|----------------------------------------|
| 1646,397,O,38,HZ3,397-O-38-HZ3       | 1686,413,OE1,410,HD22,413-OE1-410-HD22 |
| 1647,397,O,399,H,397-O-399-H         | 1687,413,O,413,HE21,413-O-413-HE21     |
| 1648,398,O,38,H,398-O-38-H           | 1688,413,NE2,68,HE21,413-NE2-68-HE21   |
| 1649,398,O,38,HZ3,398-O-38-HZ3       | 1689,413,OE1,68,HE22,413-OE1-68-HE22   |
| 1650,398,O,38,HZ1,398-O-38-HZ1       | 1690,413,O,416,H,413-O-416-H           |
| 1651,398,O,38,HZ2,398-O-38-HZ2       | 1691,414,O,421,HE1,414-O-421-HE1       |
| 1652,399,O,396,H,399-O-396-H         | 1692,414,O,417,H,414-O-417-H           |
| 1653,399,O,395,HG,399-O-395-HG       | 1693,415,OD1,448,H,415-OD1-448-H       |
| 1654,400,O,39,HD22,400-O-39-HD22     | 1694,415,O,377,HH11,415-O-377-HH11     |
| 1655,401,O,394,H,401-O-394-H         | 1695,416,O,418,HE21,416-O-418-HE21     |
| 1656,402,O,405,H,402-O-405-H         | 1696,416,ND1,377,HH12,416-ND1-377-HH12 |
| 1657,402,O,390,HG1,402-O-390-HG1     | 1697,417,OD1,68,HE22,417-OD1-68-HE22   |
| 1658,403,O,405,HH11,403-O-405-HH11   | 1698,417,OD1,418,HE22,417-OD1-418-HE22 |
| 1659,404,O,389,HG,404-O-389-HG       | 1699,417,OD2,413,HE21,417-OD2-413-HE21 |
| 1660,404,O,405,HH11,404-O-405-HH11   | 1700,417,OD1,413,HE22,417-OD1-413-HE22 |
| 1661,405,O,389,HG,405-O-389-HG       | 1701,417,OD1,419,HZ1,417-OD1-419-HZ1   |
| 1662,405,O,390,H,405-O-390-H         | 1702,417,OD1,413,HE21,417-OD1-413-HE21 |
| 1663,405,O,390,HG1,405-O-390-HG1     | 1703,417,OD2,413,HE22,417-OD2-413-HE22 |
| 1664,406,O,84,H,406-O-84-H           | 1704,417,OD2,68,HE22,417-OD2-68-HE22   |
| 1665,407,O,388,H,407-O-388-H         | 1705,417,O,420,H,417-O-420-H           |
| 1666,408,O,86,H,408-O-86-H           | 1706,417,OD1,420,H,417-OD1-420-H       |
| 1667,409,O,411,H,409-O-411-H         | 1707,417,OD1,419,HZ2,417-OD1-419-HZ2   |
| 1668,409,O,385,H,409-O-385-H         | 1708,417,OD2,419,HZ2,417-OD2-419-HZ2   |
| 1669,410,OD1,413,H,410-OD1-413-H     | 1709,417,OD2,420,H,417-OD2-420-H       |
| 1670,410,OD1,412,H,410-OD1-412-H     | 1710,417,OD1,419,H,417-OD1-419-H       |
| 1671,410,OD1,411,H,410-OD1-411-H     | 1711,417,OD1,419,HZ3,417-OD1-419-HZ3   |
| 1672,410,O,413,H,410-O-413-H         | 1712,417,OD2,419,HZ1,417-OD2-419-HZ1   |
| 1673,411,OE1,451,H,411-OE1-451-H     | 1713,417,O,421,H,417-O-421-H           |
| 1674,411,O,415,HD22,411-O-415-HD22   | 1714,417,OD2,419,H,417-OD2-419-H       |
| 1675,411,O,414,H,411-O-414-H         | 1715,417,OD2,419,HZ3,417-OD2-419-HZ3   |
| 1676,411,O,415,H,411-O-415-H         | 1716,418,OE1,418,H,418-OE1-418-H       |
| 1677,412,O,415,H,412-O-415-H         | 1717,418,OE1,65,HH12,418-OE1-65-HH12   |
| 1678,412,O,416,H,412-O-416-H         | 1718,418,OE1,419,HZ2,418-OE1-419-HZ2   |
| 1679,413,OE1,87,HG,413-OE1-87-HG     | 1719,418,OE1,65,HH22,418-OE1-65-HH22   |
| 1680,413,O,417,H,413-O-417-H         | 1720,418,OE1,413,HE22,418-OE1-413-HE22 |
| 1681,413,OE1,88,H,413-OE1-88-H       | 1721,418,OE1,68,HE22,418-OE1-68-HE22   |
| 1682,413,NE2,68,HE22,413-NE2-68-HE22 | 1722,418,OE1,423,H,418-OE1-423-H       |
| 1683,413,OE1,64,HG,413-OE1-64-HG     | 1723,418,O,422,H,418-O-422-H           |
| 1684,413,OE1,68,HE21,413-OE1-68-HE21 | 1724,418,OE1,68,HE21,418-OE1-68-HE21   |
| 1685,413,OE1,67,HG,413-OE1-67-HG     | 1725,418,O,418,HE21,418-O-418-HE21     |

|                                        |                                        |
|----------------------------------------|----------------------------------------|
| 1726,420,O,446,HZ2,420-O-446-HZ2       | 1766,430,OE1,367,HH,430-OE1-367-HH     |
| 1727,420,O,446,HZ1,420-O-446-HZ1       | 1767,430,OE2,342,HZ2,430-OE2-342-HZ2   |
| 1728,420,O,446,HZ3,420-O-446-HZ3       | 1768,430,OE2,342,HZ3,430-OE2-342-HZ3   |
| 1729,421,O,431,HE,421-O-431-HE         | 1769,430,OE1,430,H,430-OE1-430-H       |
| 1730,421,O,431,HH21,421-O-431-HH21     | 1770,430,OE2,338,HH22,430-OE2-338-HH22 |
| 1731,422,O,431,HH21,422-O-431-HH21     | 1771,430,OE1,338,HH22,430-OE1-338-HH22 |
| 1732,422,O,431,HE,422-O-431-HE         | 1772,430,O,433,H,430-O-433-H           |
| 1733,423,O,431,HH21,423-O-431-HH21     | 1773,430,OE2,338,HH12,430-OE2-338-HH12 |
| 1734,423,O,426,H,423-O-426-H           | 1774,431,O,433,H,431-O-433-H           |
| 1735,423,OD1,418,HE22,423-OD1-418-HE22 | 1775,432,O,440,H,432-O-440-H           |
| 1736,423,OD1,426,H,423-OD1-426-H       | 1776,434,O,437,H,434-O-437-H           |
| 1737,423,O,423,HD22,423-O-423-HD22     | 1777,434,OG1,438,H,434-OG1-438-H       |
| 1738,423,O,431,HH22,423-O-431-HH22     | 1778,434,OG1,436,H,434-OG1-436-H       |
| 1739,424,O,377,HH12,424-O-377-HH12     | 1779,434,OG1,437,H,434-OG1-437-H       |
| 1740,424,O,377,HH22,424-O-377-HH22     | 1780,435,O,437,H,435-O-437-H           |
| 1741,425,O,425,HG,425-O-425-HG         | 1781,436,OD2,436,H,436-OD2-436-H       |
| 1742,425,O,378,HE2,425-O-378-HE2       | 1782,436,OD1,434,HG1,436-OD1-434-HG1   |
| 1743,426,O,431,HH22,426-O-431-HH22     | 1783,436,OD1,438,H,436-OD1-438-H       |
| 1744,426,OE2,423,HD21,426-OE2-423-HD21 | 1784,436,OD1,436,H,436-OD1-436-H       |
| 1745,426,OE1,423,HD22,426-OE1-423-HD22 | 1785,436,O,438,H,436-O-438-H           |
| 1746,426,OE1,425,HG,426-OE1-425-HG     | 1786,436,OD2,434,HG1,436-OD2-434-HG1   |
| 1747,426,OE1,427,H,426-OE1-427-H       | 1787,436,OD2,438,H,436-OD2-438-H       |
| 1748,426,OE2,425,HG,426-OE2-425-HG     | 1788,438,O,434,HG1,438-O-434-HG1       |
| 1749,426,O,431,HH12,426-O-431-HH12     | 1789,438,O,434,H,438-O-434-H           |
| 1750,426,OE2,423,HD22,426-OE2-423-HD22 | 1790,439,O,441,HZ3,439-O-441-HZ3       |
| 1751,426,O,431,HH21,426-O-431-HH21     | 1791,439,O,441,HZ2,439-O-441-HZ2       |
| 1752,426,OE1,423,HD21,426-OE1-423-HD21 | 1792,439,O,441,HZ1,439-O-441-HZ1       |
| 1753,426,OE2,427,H,426-OE2-427-H       | 1793,439,O,441,H,439-O-441-H           |
| 1754,427,O,338,HH21,427-O-338-HH21     | 1794,440,O,444,H,440-O-444-H           |
| 1755,428,O,431,H,428-O-431-H           | 1795,440,O,444,HG,440-O-444-HG         |
| 1756,428,O,431,HH11,428-O-431-HH11     | 1796,440,OD1,443,H,440-OD1-443-H       |
| 1757,429,O,432,H,429-O-432-H           | 1797,440,O,443,H,440-O-443-H           |
| 1758,429,O,433,H,429-O-433-H           | 1798,440,OD2,443,H,440-OD2-443-H       |
| 1759,430,OE2,342,HZ1,430-OE2-342-HZ1   | 1799,440,OD1,442,H,440-OD1-442-H       |
| 1760,430,OE2,430,H,430-OE2-430-H       | 1800,440,OD2,442,H,440-OD2-442-H       |
| 1761,430,OE1,338,HH12,430-OE1-338-HH12 | 1801,440,OD1,444,HG,440-OD1-444-HG     |
| 1762,430,OE1,342,HZ1,430-OE1-342-HZ1   | 1802,440,O,442,H,440-O-442-H           |
| 1763,430,OE1,342,HZ2,430-OE1-342-HZ2   | 1803,440,OD1,444,H,440-OD1-444-H       |
| 1764,430,OE1,342,HZ3,430-OE1-342-HZ3   | 1804,441,O,445,H,441-O-445-H           |
| 1765,430,OE2,367,HH,430-OE2-367-HH     | 1805,441,O,444,HG,441-O-444-HG         |

|                                        |                                        |
|----------------------------------------|----------------------------------------|
| 1806,442,O,446,H,442-O-446-H           | 1846,453,O,456,HZ1,453-O-456-HZ1       |
| 1807,442,O,446,HZ2,442-O-446-HZ2       | 1847,453,O,456,HZ2,453-O-456-HZ2       |
| 1808,442,O,446,HZ3,442-O-446-HZ3       | 1848,453,O,456,H,453-O-456-H           |
| 1809,442,O,445,H,442-O-445-H           | 1849,453,O,455,H,453-O-455-H           |
| 1810,442,O,446,HZ1,442-O-446-HZ1       | 1850,453,O,456,HZ3,453-O-456-HZ3       |
| 1811,443,O,447,H,443-O-447-H           | 1851,454,O,456,H,454-O-456-H           |
| 1812,443,O,446,H,443-O-446-H           | 1852,454,O,135,HH12,454-O-135-HH12     |
| 1813,444,OG,445,H,444-OG-445-H         | 1853,454,O,135,HH22,454-O-135-HH22     |
| 1814,444,O,447,H,444-O-447-H           | 1854,454,O,135,HH21,454-O-135-HH21     |
| 1815,445,OE2,446,HZ2,445-OE2-446-HZ2   | 1855,455,O,452,H,455-O-452-H           |
| 1816,445,OE2,93,HH12,445-OE2-93-HH12   | 1856,455,O,135,HH12,455-O-135-HH12     |
| 1817,445,OE2,93,HH21,445-OE2-93-HH21   | 1857,456,O,135,HH12,456-O-135-HH12     |
| 1818,445,OE1,93,HH21,445-OE1-93-HH21   | 1858,456,O,135,HH22,456-O-135-HH22     |
| 1819,445,OE1,464,HH22,445-OE1-464-HH22 | 1859,456,O,135,HH21,456-O-135-HH21     |
| 1820,445,OE2,464,HH12,445-OE2-464-HH12 | 1860,457,O,456,HZ2,457-O-456-HZ2       |
| 1821,445,OE2,93,HH22,445-OE2-93-HH22   | 1861,457,O,456,HZ1,457-O-456-HZ1       |
| 1822,445,OE2,446,HZ3,445-OE2-446-HZ3   | 1862,457,O,460,H,457-O-460-H           |
| 1823,445,OE1,464,HH12,445-OE1-464-HH12 | 1863,457,O,456,HZ3,457-O-456-HZ3       |
| 1824,445,OE2,464,HH22,445-OE2-464-HH22 | 1864,458,O,461,H,458-O-461-H           |
| 1825,445,OE1,93,HE,445-OE1-93-HE       | 1865,458,O,461,HG1,458-O-461-HG1       |
| 1826,445,OE1,446,HZ3,445-OE1-446-HZ3   | 1866,458,O,139,HE21,458-O-139-HE21     |
| 1827,445,OE1,444,HG,445-OE1-444-HG     | 1867,458,O,139,HE22,458-O-139-HE22     |
| 1828,445,OE2,446,HZ1,445-OE2-446-HZ1   | 1868,459,O,463,H,459-O-463-H           |
| 1829,445,OE2,444,HG,445-OE2-444-HG     | 1869,459,O,462,H,459-O-462-H           |
| 1830,445,OE1,446,HZ2,445-OE1-446-HZ2   | 1870,460,OE2,456,HZ3,460-OE2-456-HZ3   |
| 1831,445,OE1,446,HZ1,445-OE1-446-HZ1   | 1871,460,OE2,464,HH21,460-OE2-464-HH21 |
| 1832,445,OE1,441,HZ1,445-OE1-441-HZ1   | 1872,460,O,464,HE,460-O-464-HE         |
| 1833,445,O,93,HH22,445-O-93-HH22       | 1873,460,OE1,461,HG1,460-OE1-461-HG1   |
| 1834,445,OE2,456,HZ2,445-OE2-456-HZ2   | 1874,460,O,464,HH11,460-O-464-HH11     |
| 1835,445,OE1,93,HH22,445-OE1-93-HH22   | 1875,460,OE2,464,HH12,460-OE2-464-HH12 |
| 1836,445,O,93,HH21,445-O-93-HH21       | 1876,460,OE2,461,HG1,460-OE2-461-HG1   |
| 1837,445,OE1,93,HH12,445-OE1-93-HH12   | 1877,460,OE1,464,HH11,460-OE1-464-HH11 |
| 1838,446,O,448,H,446-O-448-H           | 1878,460,OE1,456,HZ2,460-OE1-456-HZ2   |
| 1839,448,O,415,HD21,448-O-415-HD21     | 1879,460,OE1,456,HZ3,460-OE1-456-HZ3   |
| 1840,449,O,411,HE22,449-O-411-HE22     | 1880,460,OE2,464,HH22,460-OE2-464-HH22 |
| 1841,450,O,457,H,450-O-457-H           | 1881,460,OE2,456,HZ2,460-OE2-456-HZ2   |
| 1842,451,O,456,HZ1,451-O-456-HZ1       | 1882,460,OE1,143,HZ1,460-OE1-143-HZ1   |
| 1843,451,O,456,HZ3,451-O-456-HZ3       | 1883,460,OE1,143,HZ2,460-OE1-143-HZ2   |
| 1844,452,O,456,H,452-O-456-H           | 1884,460,OE1,464,HH22,460-OE1-464-HH22 |
| 1845,452,O,455,H,452-O-455-H           | 1885,460,OE1,461,H,460-OE1-461-H       |

|                                        |                                        |
|----------------------------------------|----------------------------------------|
| 1886,460,OE2,456,HZ1,460-OE2-456-HZ1   | 1926,476,OE1,477,HH21,476-OE1-477-HH21 |
| 1887,460,OE1,464,HH12,460-OE1-464-HH12 | 1927,476,O,511,HH21,476-O-511-HH21     |
| 1888,460,OE1,456,HZ1,460-OE1-456-HZ1   | 1928,477,O,511,H,477-O-511-H           |
| 1889,460,O,464,H,460-O-464-H           | 1929,478,O,344,HE22,478-O-344-HE22     |
| 1890,460,OE2,461,H,460-OE2-461-H       | 1930,478,O,344,HE21,478-O-344-HE21     |
| 1891,460,OE2,143,HZ1,460-OE2-143-HZ1   | 1931,479,OE1,512,HG,479-OE1-512-HG     |
| 1892,460,OE2,464,HH11,460-OE2-464-HH11 | 1932,479,OE1,512,H,479-OE1-512-H       |
| 1893,461,O,465,H,461-O-465-H           | 1933,479,OE1,341,HH22,479-OE1-341-HH22 |
| 1894,461,O,464,H,461-O-464-H           | 1934,479,O,509,H,479-O-509-H           |
| 1895,462,O,466,H,462-O-466-H           | 1935,479,OE2,512,HG,479-OE2-512-HG     |
| 1896,462,O,464,H,462-O-464-H           | 1936,479,OE2,341,HH12,479-OE2-341-HH12 |
| 1897,462,O,465,H,462-O-465-H           | 1937,479,OE1,344,HE22,479-OE1-344-HE22 |
| 1898,463,O,467,H,463-O-467-H           | 1938,479,OE1,341,HH12,479-OE1-341-HH12 |
| 1899,464,O,362,HH21,464-O-362-HH21     | 1939,479,OE2,341,HH22,479-OE2-341-HH22 |
| 1900,464,O,362,HH12,464-O-362-HH12     | 1940,479,OE1,509,HE21,479-OE1-509-HE21 |
| 1901,464,O,362,HH22,464-O-362-HH22     | 1941,479,OE2,341,HH11,479-OE2-341-HH11 |
| 1902,464,O,468,H,464-O-468-H           | 1942,479,O,509,HE21,479-O-509-HE21     |
| 1903,465,O,468,H,465-O-468-H           | 1943,479,OE2,509,HE21,479-OE2-509-HE21 |
| 1904,465,O,469,H,465-O-469-H           | 1944,479,OE2,341,HE,479-OE2-341-HE     |
| 1905,466,O,470,H,466-O-470-H           | 1945,479,OE1,341,HH11,479-OE1-341-HH11 |
| 1906,466,O,469,H,466-O-469-H           | 1946,479,OE1,341,HE,479-OE1-341-HE     |
| 1907,467,O,471,H,467-O-471-H           | 1947,479,OE2,341,HH21,479-OE2-341-HH21 |
| 1908,468,O,472,H,468-O-472-H           | 1948,479,OE1,341,HH21,479-OE1-341-HH21 |
| 1909,468,O,471,H,468-O-471-H           | 1949,479,OE2,512,H,479-OE2-512-H       |
| 1910,469,O,473,H,469-O-473-H           | 1950,479,OE2,344,HE22,479-OE2-344-HE22 |
| 1911,470,O,474,H,470-O-474-H           | 1951,480,O,340,HE22,480-O-340-HE22     |
| 1912,471,O,475,H,471-O-475-H           | 1952,480,O,481,HG,480-O-481-HG         |
| 1913,472,O,476,H,472-O-476-H           | 1953,481,O,507,H,481-O-507-H           |
| 1914,473,O,477,H,473-O-477-H           | 1954,481,OG,507,HE21,481-OG-507-HE21   |
| 1915,473,O,476,H,473-O-476-H           | 1955,481,OG,509,HE22,481-OG-509-HE22   |
| 1916,473,O,477,HH21,473-O-477-HH21     | 1956,481,OG,482,H,481-OG-482-H         |
| 1917,473,O,477,HE,473-O-477-HE         | 1957,482,O,481,HG,482-O-481-HG         |
| 1918,474,O,477,H,474-O-477-H           | 1958,483,O,485,H,483-O-485-H           |
| 1919,474,O,478,H,474-O-478-H           | 1959,483,O,486,H,483-O-486-H           |
| 1920,475,O,511,HH11,475-O-511-HH11     | 1960,484,O,487,HZ1,484-O-487-HZ1       |
| 1921,475,O,344,HE21,475-O-344-HE21     | 1961,484,O,486,H,484-O-486-H           |
| 1922,475,O,511,HE,475-O-511-HE         | 1962,484,O,487,HZ3,484-O-487-HZ3       |
| 1923,475,O,511,HH21,475-O-511-HH21     | 1963,485,O,487,HZ2,485-O-487-HZ2       |
| 1924,476,O,353,HE,476-O-353-HE         | 1964,485,O,487,HZ1,485-O-487-HZ1       |
| 1925,476,O,511,HE,476-O-511-HE         | 1965,485,O,487,HZ3,485-O-487-HZ3       |



|                                      |                                        |
|--------------------------------------|----------------------------------------|
| 1966,486,O,505,HE2,486-O-505-HE2     | 2006,500,NE2,327,HG,500-NE2-327-HG     |
| 1967,486,O,488,H,486-O-488-H         | 2007,500,O,502,H,500-O-502-H           |
| 1968,487,O,489,H,487-O-489-H         | 2008,500,O,500,HD1,500-O-500-HD1       |
| 1969,487,O,505,HE2,487-O-505-HE2     | 2009,501,O,503,H,501-O-503-H           |
| 1970,488,O,487,HZ3,488-O-487-HZ3     | 2010,501,O,500,HD1,501-O-500-HD1       |
| 1971,488,O,487,HZ1,488-O-487-HZ1     | 2011,502,O,487,HZ1,502-O-487-HZ1       |
| 1972,488,O,487,HZ2,488-O-487-HZ2     | 2012,502,O,487,HZ3,502-O-487-HZ3       |
| 1973,489,OD2,487,HZ2,489-OD2-487-HZ2 | 2013,503,O,505,H,503-O-505-H           |
| 1974,489,OD2,490,H,489-OD2-490-H     | 2014,503,O,185,HD22,503-O-185-HD22     |
| 1975,489,OD1,487,HZ1,489-OD1-487-HZ1 | 2015,504,OE1,185,HD22,504-OE1-185-HD22 |
| 1976,489,OD2,487,HZ1,489-OD2-487-HZ1 | 2016,504,OE1,188,HE,504-OE1-188-HE     |
| 1977,489,OD1,487,HZ3,489-OD1-487-HZ3 | 2017,504,OE2,185,H,504-OE2-185-H       |
| 1978,489,OD1,490,H,489-OD1-490-H     | 2018,504,OE1,188,HH21,504-OE1-188-HH21 |
| 1979,489,O,501,H,489-O-501-H         | 2019,504,OE2,504,H,504-OE2-504-H       |
| 1980,489,O,491,H,489-O-491-H         | 2020,504,OE1,504,H,504-OE1-504-H       |
| 1981,489,OD2,491,H,489-OD2-491-H     | 2021,504,OE2,188,HH21,504-OE2-188-HH21 |
| 1982,489,OD1,487,HZ2,489-OD1-487-HZ2 | 2022,504,OE2,188,HH11,504-OE2-188-HH11 |
| 1983,489,O,500,HD1,489-O-500-HD1     | 2023,504,OE2,188,HE,504-OE2-188-HE     |
| 1984,489,OD2,491,HG1,489-OD2-491-HG1 | 2024,504,OE1,188,HH11,504-OE1-188-HH11 |
| 1985,489,OD1,491,HG1,489-OD1-491-HG1 | 2025,504,OE2,503,H,504-OE2-503-H       |
| 1986,489,OD1,491,H,489-OD1-491-H     | 2026,504,OE1,183,HE2,504-OE1-183-HE2   |
| 1987,490,O,501,H,490-O-501-H         | 2027,504,OE2,188,HH12,504-OE2-188-HH12 |
| 1988,491,O,501,H,491-O-501-H         | 2028,504,OE2,185,HD22,504-OE2-185-HD22 |
| 1989,492,O,58,HD21,492-O-58-HD21     | 2029,504,OE2,188,HH22,504-OE2-188-HH22 |
| 1990,493,O,499,H,493-O-499-H         | 2030,504,OE1,188,HH12,504-OE1-188-HH12 |
| 1991,494,OH,230,HG,494-OH-230-HG     | 2031,504,OE1,185,H,504-OE1-185-H       |
| 1992,494,O,57,HZ2,494-O-57-HZ2       | 2032,504,OE1,188,HH22,504-OE1-188-HH22 |
| 1993,494,OH,230,H,494-OH-230-H       | 2033,505,ND1,504,H,505-ND1-504-H       |
| 1994,494,O,57,HZ3,494-O-57-HZ3       | 2034,505,O,507,HE21,505-O-507-HE21     |
| 1995,497,OG1,499,HZ1,497-OG1-499-HZ1 | 2035,506,O,184,H,506-O-184-H           |
| 1996,497,OG1,499,HZ2,497-OG1-499-HZ2 | 2036,507,NE2,183,HE2,507-NE2-183-HE2   |
| 1997,497,O,499,HZ3,497-O-499-HZ3     | 2037,507,OE1,509,HE22,507-OE1-509-HE22 |
| 1998,497,O,499,HZ1,497-O-499-HZ1     | 2038,507,O,481,H,507-O-481-H           |
| 1999,497,OG1,499,HZ3,497-OG1-499-HZ3 | 2039,507,OE1,481,HG,507-OE1-481-HG     |
| 2000,497,O,495,H,497-O-495-H         | 2040,507,OE1,183,HE2,507-OE1-183-HE2   |
| 2001,497,O,499,HZ2,497-O-499-HZ2     | 2041,507,OE1,509,HE21,507-OE1-509-HE21 |
| 2002,497,O,497,HG1,497-O-497-HG1     | 2042,508,O,509,HE21,508-O-509-HE21     |
| 2003,498,O,328,HE1,498-O-328-HE1     | 2043,509,OE1,507,HE22,509-OE1-507-HE22 |
| 2004,499,O,493,H,499-O-493-H         | 2044,509,OE1,481,HG,509-OE1-481-HG     |
| 2005,500,ND1,501,H,500-ND1-501-H     | 2045,509,O,479,H,509-O-479-H           |

2046,509,OE1,507,HE21,509-OE1-507-HE21  
2047,509,OE1,510,H,509-OE1-510-H  
2048,509,O,511,H,509-O-511-H  
2049,510,O,509,HE21,510-O-509-HE21  
2050,510,O,512,HG,510-O-512-HG  
2051,511,O,353,HH12,511-O-353-HH12  
2052,511,O,353,HH22,511-O-353-HH22  
2053,511,O,353,HH11,511-O-353-HH11  
2054,511,O,512,HG,511-O-512-HG  
2055,512,O,512,HG,512-O-512-HG  
2056,512,O,353,HH11,512-O-353-HH11  
2057,512,O,353,HH12,512-O-353-HH12  
2058,512,O,511,HH11,512-O-511-HH11  
2059,512,OXT,512,HG,512-OXT-512-HG  
2060,512,OXT,353,HH22,512-OXT-353-HH22  
2061,512,OXT,353,HH11,512-OXT-353-HH11  
2062,512,OXT,353,HH12,512-OXT-353-HH12  
2063,512,O,353,HH22,512-O-353-HH22  
2064,512,O,341,HH12,512-O-341-HH12  
2065,515,O1A,106,HH22,515-O1A-106-HH22  
2066,515,O1D,135,HE,515-O1D-135-HE  
2067,515,O2A,386,H,515-O2A-386-H  
2068,515,O2D,455,HH11,515-O2D-455-HH11  
2069,515,O1A,386,H,515-O1A-386-H  
2070,515,O2D,106,HH21,515-O2D-106-HH21  
2071,515,O2A,106,HH22,515-O2A-106-HH22  
2072,515,O2A,106,HH12,515-O2A-106-HH12  
2073,515,O1D,455,HH11,515-O1D-455-HH11  
2074,515,O2A,455,HH11,515-O2A-455-HH11  
2075,515,O2D,135,HH21,515-O2D-135-HH21  
2076,515,O1D,455,HH12,515-O1D-455-HH12  
2077,515,O1A,106,HH12,515-O1A-106-HH12  
2078,515,O2D,135,HH11,515-O2D-135-HH11  
2079,515,O1D,131,HE1,515-O1D-131-HE1  
2080,515,O1D,106,HH21,515-O1D-106-HH21  
2081,515,O2D,135,HE,515-O2D-135-HE  
2082,515,O1D,135,HH21,515-O1D-135-HH21  
2083,515,O1D,135,HH11,515-O1D-135-HH11  
2084,516,O15,222,HD22,516-O15-222-HD22  
2085,516,O18,122,HG,516-O18-122-HG

2086,516,O15,255,HD22,516-O15-255-HD22

## Model III

RES\_DONOR,ATOM\_DONOR,RES\_ACCEPTOR,ATOM\_ACCEPTOR,  
TAG

1,37,O,39,H,37-O-39-H  
2,37,O,39,HD22,37-O-39-HD22  
3,38,O,400,H,38-O-400-H  
4,39,O,38,HZ1,39-O-38-HZ1  
5,39,O,39,HD22,39-O-39-HD22  
6,39,O,38,HZ2,39-O-38-HZ2  
7,39,OD1,39,H,39-OD1-39-H  
8,39,ND2,75,HE22,39-ND2-75-HE22  
9,39,N,39,HD22,39-N-39-HD22  
10,39,OD1,405,HH21,39-OD1-405-HH21  
11,39,OD1,405,HH22,39-OD1-405-HH22  
12,39,OD1,75,HE22,39-OD1-75-HE22  
13,40,O,75,HE21,40-O-75-HE21  
14,40,O,39,HD22,40-O-39-HD22  
15,41,O,75,H,41-O-75-H  
16,43,O,51,HE2,43-O-51-HE2  
17,44,O,51,HE2,44-O-51-HE2  
18,45,O,77,HH12,45-O-77-HH12  
19,45,O,77,HH21,45-O-77-HH21  
20,45,O,77,HH11,45-O-77-HH11  
21,45,O,77,HE,45-O-77-HE  
22,45,O,77,HH22,45-O-77-HH22  
23,46,O,77,HE,46-O-77-HE  
24,46,O,50,H,46-O-50-H  
25,46,O,48,H,46-O-48-H  
26,46,O,77,HH21,46-O-77-HH21  
27,46,O,77,HH22,46-O-77-HH22  
28,46,O,49,H,46-O-49-H  
29,46,O,77,HH12,46-O-77-HH12  
30,46,O,77,HH11,46-O-77-HH11  
31,47,O,80,HG,47-O-80-HG  
32,47,O,77,HH21,47-O-77-HH21  
33,47,O,77,HH11,47-O-77-HH11  
34,47,O,77,HH12,47-O-77-HH12  
35,47,O,77,HE,47-O-77-HE  
36,47,O,77,HH22,47-O-77-HH22

|                                  |                                     |
|----------------------------------|-------------------------------------|
| 37,48,O,77,HH21,48-O-77-HH21     | 77,62,O,65,H,62-O-65-H              |
| 38,48,O,80,HG,48-O-80-HG         | 78,63,O,410,HD21,63-O-410-HD21      |
| 39,48,O,77,HH12,48-O-77-HH12     | 79,63,O,67,H,63-O-67-H              |
| 40,49,O,79,H,49-O-79-H           | 80,63,O,410,HD22,63-O-410-HD22      |
| 41,49,O,52,H,49-O-52-H           | 81,63,O,67,HG,63-O-67-HG            |
| 42,50,O,52,H,50-O-52-H           | 82,64,OG,68,HE21,64-OG-68-HE21      |
| 43,50,O,46,H,50-O-46-H           | 83,64,O,67,HG,64-O-67-HG            |
| 44,51,O,55,H,51-O-55-H           | 84,64,OG,410,HD21,64-OG-410-HD21    |
| 45,51,O,54,H,51-O-54-H           | 85,64,O,67,H,64-O-67-H              |
| 46,51,O,54,HG1,51-O-54-HG1       | 86,64,OG,68,HE22,64-OG-68-HE22      |
| 47,51,O,53,H,51-O-53-H           | 87,64,O,68,HE21,64-O-68-HE21        |
| 48,51,ND1,51,H,51-ND1-51-H       | 88,64,O,413,HE22,64-O-413-HE22      |
| 49,51,ND1,77,H,51-ND1-77-H       | 89,64,OG,65,HH21,64-OG-65-HH21      |
| 50,52,O,55,H,52-O-55-H           | 90,64,O,68,H,64-O-68-H              |
| 51,52,O,56,H,52-O-56-H           | 91,64,OG,413,HE22,64-OG-413-HE22    |
| 52,53,O,56,H,53-O-56-H           | 92,65,O,69,H,65-O-69-H              |
| 53,54,OG1,46,HE1,54-OG1-46-HE1   | 93,65,O,69,HE21,65-O-69-HE21        |
| 54,54,O,54,HG1,54-O-54-HG1       | 94,65,O,68,H,65-O-68-H              |
| 55,54,O,56,H,54-O-56-H           | 95,65,NH1,68,HE22,65-NH1-68-HE22    |
| 56,54,O,65,HH22,54-O-65-HH22     | 96,65,O,65,HH11,65-O-65-HH11        |
| 57,55,O,58,H,55-O-58-H           | 97,65,O,65,HE,65-O-65-HE            |
| 58,55,O,58,HD22,55-O-58-HD22     | 98,65,O,68,HE21,65-O-68-HE21        |
| 59,57,O,57,HZ2,57-O-57-HZ2       | 99,65,O,69,HE22,65-O-69-HE22        |
| 60,57,O,57,HZ3,57-O-57-HZ3       | 100,66,O,69,H,66-O-69-H             |
| 61,57,O,57,HZ1,57-O-57-HZ1       | 101,66,O,70,H,66-O-70-H             |
| 62,57,O,58,HD22,57-O-58-HD22     | 102,67,OG,413,HE21,67-OG-413-HE21   |
| 63,58,O,58,HD22,58-O-58-HD22     | 103,67,O,70,H,67-O-70-H             |
| 64,58,O,61,H,58-O-61-H           | 104,67,OG,87,HG,67-OG-87-HG         |
| 65,58,OD1,57,HZ2,58-OD1-57-HZ2   | 105,67,O,71,H,67-O-71-H             |
| 66,58,OD1,65,HH22,58-OD1-65-HH22 | 106,67,OG,413,HE22,67-OG-413-HE22   |
| 67,58,O,62,H,58-O-62-H           | 107,67,O,69,H,67-O-69-H             |
| 68,59,O,63,H,59-O-63-H           | 108,67,OG,410,HD22,67-OG-410-HD22   |
| 69,60,O,410,HD21,60-O-410-HD21   | 109,67,OG,68,HE21,67-OG-68-HE21     |
| 70,60,ND1,60,H,60-ND1-60-H       | 110,68,O,69,HE21,68-O-69-HE21       |
| 71,60,O,64,H,60-O-64-H           | 111,68,O,68,HE21,68-O-68-HE21       |
| 72,60,O,64,HG,60-O-64-HG         | 112,68,OE1,65,HH22,68-OE1-65-HH22   |
| 73,61,O,64,HG,61-O-64-HG         | 113,68,OE1,65,HH21,68-OE1-65-HH21   |
| 74,61,O,64,H,61-O-64-H           | 114,68,OE1,413,HE22,68-OE1-413-HE22 |
| 75,61,O,65,H,61-O-65-H           | 115,68,OE1,418,HE22,68-OE1-418-HE22 |
| 76,62,O,66,H,62-O-66-H           | 116,68,OE1,69,HE21,68-OE1-69-HE21   |

|                                     |                                   |
|-------------------------------------|-----------------------------------|
| 117,68,OE1,419,HZ2,68-OE1-419-HZ2   | 157,78,O,81,HG1,78-O-81-HG1       |
| 118,68,NE2,413,HE22,68-NE2-413-HE22 | 158,78,O,80,H,78-O-80-H           |
| 119,68,OE1,419,HZ1,68-OE1-419-HZ1   | 159,79,O,77,HH11,79-O-77-HH11     |
| 120,68,OE1,65,HH11,68-OE1-65-HH11   | 160,79,O,81,H,79-O-81-H           |
| 121,68,OE1,65,HE,68-OE1-65-HE       | 161,79,O,77,HH21,79-O-77-HH21     |
| 122,68,OE1,419,HZ3,68-OE1-419-HZ3   | 162,79,O,77,HE,79-O-77-HE         |
| 123,68,OE1,65,HH12,68-OE1-65-HH12   | 163,80,OG,81,HG1,80-OG-81-HG1     |
| 124,69,OE1,65,HH22,69-OE1-65-HH22   | 164,80,O,80,HG,80-O-80-HG         |
| 125,69,OE1,70,HH,69-OE1-70-HH       | 165,80,O,77,HH11,80-O-77-HH11     |
| 126,69,OE1,65,HH21,69-OE1-65-HH21   | 166,80,O,77,HE,80-O-77-HE         |
| 127,69,OE1,68,HE21,69-OE1-68-HE21   | 167,80,O,77,HH21,80-O-77-HH21     |
| 128,69,O,69,HE21,69-O-69-HE21       | 168,80,O,77,HH12,80-O-77-HH12     |
| 129,69,OE1,65,HH12,69-OE1-65-HH12   | 169,80,OG,77,HH21,80-OG-77-HH21   |
| 130,70,OH,69,HE21,70-OH-69-HE21     | 170,81,O,78,H,81-O-78-H           |
| 131,71,O,67,HG,71-O-67-HG           | 171,82,O,405,HH11,82-O-405-HH11   |
| 132,71,O,87,HG,71-O-87-HG           | 172,83,O,76,H,83-O-76-H           |
| 133,72,OD1,397,HZ3,72-OD1-397-HZ3   | 173,83,O,75,HE21,83-O-75-HE21     |
| 134,72,OD1,72,H,72-OD1-72-H         | 174,84,O,408,H,84-O-408-H         |
| 135,72,OD2,397,HZ3,72-OD2-397-HZ3   | 175,85,O,74,H,85-O-74-H           |
| 136,72,OD2,397,HZ1,72-OD2-397-HZ1   | 176,85,O,87,HG,85-O-87-HG         |
| 137,72,OD2,397,HZ2,72-OD2-397-HZ2   | 177,86,O,410,H,86-O-410-H         |
| 138,72,OD2,72,H,72-OD2-72-H         | 178,86,O,87,HG,86-O-87-HG         |
| 139,72,O,87,H,72-O-87-H             | 179,87,OG,410,HD22,87-OG-410-HD22 |
| 140,72,O,88,H,72-O-88-H             | 180,87,O,87,HG,87-O-87-HG         |
| 141,72,OD1,91,HG1,72-OD1-91-HG1     | 181,87,OG,67,HG,87-OG-67-HG       |
| 142,72,OD1,397,HZ1,72-OD1-397-HZ1   | 182,87,O,413,HE21,87-O-413-HE21   |
| 143,72,OD1,397,HZ2,72-OD1-397-HZ2   | 183,88,O,92,H,88-O-92-H           |
| 144,72,O,87,HG,72-O-87-HG           | 184,88,O,91,H,88-O-91-H           |
| 145,72,OD2,91,HG1,72-OD2-91-HG1     | 185,89,O,92,H,89-O-92-H           |
| 146,74,O,85,H,74-O-85-H             | 186,89,O,93,HH11,89-O-93-HH11     |
| 147,75,OE1,405,HH21,75-OE1-405-HH21 | 187,89,O,93,HE,89-O-93-HE         |
| 148,75,O,75,HE21,75-O-75-HE21       | 188,89,O,93,H,89-O-93-H           |
| 149,75,NE2,39,HD21,75-NE2-39-HD21   | 189,90,OD1,91,HG1,90-OD1-91-HG1   |
| 150,75,OE1,39,HD22,75-OE1-39-HD22   | 190,90,OD2,93,HE,90-OD2-93-HE     |
| 151,75,OE1,405,HE,75-OE1-405-HE     | 191,90,OD2,93,HH12,90-OD2-93-HH12 |
| 152,75,OE1,39,HD21,75-OE1-39-HD21   | 192,90,OD2,93,HH21,90-OD2-93-HH21 |
| 153,76,O,75,HE21,76-O-75-HE21       | 193,90,OD2,93,HH22,90-OD2-93-HH22 |
| 154,76,O,83,H,76-O-83-H             | 194,90,OD1,93,HH12,90-OD1-93-HH12 |
| 155,77,O,51,H,77-O-51-H             | 195,90,OD2,397,HZ1,90-OD2-397-HZ1 |
| 156,78,O,81,H,78-O-81-H             | 196,90,OD1,93,HH22,90-OD1-93-HH22 |

|                                   |                                       |
|-----------------------------------|---------------------------------------|
| 197,90,OD2,93,HH11,90-OD2-93-HH11 | 237,94,OE1,397,HZ1,94-OE1-397-HZ1     |
| 198,90,OD2,98,HH22,90-OD2-98-HH22 | 238,94,OE1,98,HH11,94-OE1-98-HH11     |
| 199,90,OD1,93,HH11,90-OD1-93-HH11 | 239,94,OE1,98,HE,94-OE1-98-HE         |
| 200,90,O,94,HE21,90-O-94-HE21     | 240,94,O,99,HE21,94-O-99-HE21         |
| 201,90,OD1,93,HH21,90-OD1-93-HH21 | 241,95,O,100,H,95-O-100-H             |
| 202,90,OD2,397,HZ3,90-OD2-397-HZ3 | 242,95,O,99,H,95-O-99-H               |
| 203,90,OD2,90,H,90-OD2-90-H       | 243,96,O,454,H,96-O-454-H             |
| 204,90,OD1,91,H,90-OD1-91-H       | 244,96,O,100,H,96-O-100-H             |
| 205,90,OD1,397,HZ3,90-OD1-397-HZ3 | 245,97,O,100,H,97-O-100-H             |
| 206,90,OD2,98,HH12,90-OD2-98-HH12 | 246,98,O,100,H,98-O-100-H             |
| 207,90,OD1,94,HE22,90-OD1-94-HE22 | 247,98,O,98,HH11,98-O-98-HH11         |
| 208,90,OD1,397,HZ1,90-OD1-397-HZ1 | 248,99,OE1,98,HH21,99-OE1-98-HH21     |
| 209,90,OD1,90,H,90-OD1-90-H       | 249,99,O,101,H,99-O-101-H             |
| 210,90,OD1,98,HH22,90-OD1-98-HH22 | 250,99,OE1,94,HE21,99-OE1-94-HE21     |
| 211,90,OD1,93,HE,90-OD1-93-HE     | 251,99,OE1,98,HH11,99-OE1-98-HH11     |
| 212,90,OD1,98,HH12,90-OD1-98-HH12 | 252,99,O,103,H,99-O-103-H             |
| 213,90,O,98,HH22,90-O-98-HH22     | 253,99,OE1,98,HE,99-OE1-98-HE         |
| 214,90,OD2,91,HG1,90-OD2-91-HG1   | 254,99,O,102,H,99-O-102-H             |
| 215,90,O,94,H,90-O-94-H           | 255,100,O,454,HZ3,100-O-454-HZ3       |
| 216,90,OD2,397,HZ2,90-OD2-397-HZ2 | 256,100,O,454,HZ2,100-O-454-HZ2       |
| 217,90,OD1,397,HZ2,90-OD1-397-HZ2 | 257,100,O,103,H,100-O-103-H           |
| 218,90,OD2,91,H,90-OD2-91-H       | 258,100,O,104,H,100-O-104-H           |
| 219,90,OD2,94,HE21,90-OD2-94-HE21 | 259,101,OD1,104,HZ3,101-OD1-104-HZ3   |
| 220,90,OD1,94,HE21,90-OD1-94-HE21 | 260,101,OD1,454,HZ1,101-OD1-454-HZ1   |
| 221,91,O,94,H,91-O-94-H           | 261,101,OD1,392,HH22,101-OD1-392-HH22 |
| 222,91,OG1,397,HZ1,91-OG1-397-HZ1 | 262,101,O,104,HZ3,101-O-104-HZ3       |
| 223,91,OG1,397,HZ3,91-OG1-397-HZ3 | 263,101,OD2,104,HZ2,101-OD2-104-HZ2   |
| 224,91,OG1,397,HZ2,91-OG1-397-HZ2 | 264,101,OD2,392,HH22,101-OD2-392-HH22 |
| 225,91,O,95,H,91-O-95-H           | 265,101,OD2,392,HH12,101-OD2-392-HH12 |
| 226,92,O,95,H,92-O-95-H           | 266,101,OD1,454,HZ2,101-OD1-454-HZ2   |
| 227,92,O,96,H,92-O-96-H           | 267,101,OD2,454,HZ3,101-OD2-454-HZ3   |
| 228,93,O,98,H,93-O-98-H           | 268,101,OD1,454,HZ3,101-OD1-454-HZ3   |
| 229,93,O,97,H,93-O-97-H           | 269,101,OD1,104,HZ1,101-OD1-104-HZ1   |
| 230,94,OE1,98,HH21,94-OE1-98-HH21 | 270,101,OD2,454,HZ2,101-OD2-454-HZ2   |
| 231,94,OE1,91,HG1,94-OE1-91-HG1   | 271,101,OD2,104,HZ1,101-OD2-104-HZ1   |
| 232,94,O,99,H,94-O-99-H           | 272,101,O,104,H,101-O-104-H           |
| 233,94,OE1,397,H,94-OE1-397-H     | 273,101,OD1,392,HH12,101-OD1-392-HH12 |
| 234,94,OE1,397,HZ2,94-OE1-397-HZ2 | 274,101,O,391,HG1,101-O-391-HG1       |
| 235,94,OE1,397,HZ3,94-OE1-397-HZ3 | 275,101,OD2,454,HZ1,101-OD2-454-HZ1   |
| 236,94,NE2,397,H,94-NE2-397-H     | 276,101,OD1,104,HZ2,101-OD1-104-HZ2   |

|                                       |                                       |
|---------------------------------------|---------------------------------------|
| 277,101,OD2,104,HZ3,101-OD2-104-HZ3   | 317,110,OH,252,HZ2,110-OH-252-HZ2     |
| 278,101,O,104,HZ2,101-O-104-HZ2       | 318,110,OH,252,HZ3,110-OH-252-HZ3     |
| 279,101,O,104,HZ1,101-O-104-HZ1       | 319,110,OH,252,HZ1,110-OH-252-HZ1     |
| 280,101,O,392,HH12,101-O-392-HH12     | 320,110,O,113,H,110-O-113-H           |
| 281,102,OD1,392,HE,102-OD1-392-HE     | 321,111,O,115,H,111-O-115-H           |
| 282,102,OD2,392,HE,102-OD2-392-HE     | 322,111,O,114,H,111-O-114-H           |
| 283,102,O,104,H,102-O-104-H           | 323,112,O,115,H,112-O-115-H           |
| 284,102,OD2,392,HH11,102-OD2-392-HH11 | 324,113,O,115,H,113-O-115-H           |
| 285,102,OD1,392,HH11,102-OD1-392-HH11 | 325,113,O,118,H,113-O-118-H           |
| 286,102,OD2,394,HG1,102-OD2-394-HG1   | 326,114,O,117,H,114-O-117-H           |
| 287,102,OD1,392,HH21,102-OD1-392-HH21 | 327,114,O,118,H,114-O-118-H           |
| 288,102,OD2,99,HE21,102-OD2-99-HE21   | 328,114,O,255,HD21,114-O-255-HD21     |
| 289,102,OD1,99,HE21,102-OD1-99-HE21   | 329,114,O,259,HH,114-O-259-HH         |
| 290,102,O,391,HG1,102-O-391-HG1       | 330,114,O,255,HD22,114-O-255-HD22     |
| 291,102,O,391,H,102-O-391-H           | 331,115,O,118,H,115-O-118-H           |
| 292,102,OD2,392,HH21,102-OD2-392-HH21 | 332,116,O,119,H,116-O-119-H           |
| 293,103,O,388,HD1,103-O-388-HD1       | 333,116,O,309,HD22,116-O-309-HD22     |
| 294,103,O,105,H,103-O-105-H           | 334,116,OG,309,HD22,116-OG-309-HD22   |
| 295,103,O,389,H,103-O-389-H           | 335,116,OG,259,HH,116-OG-259-HH       |
| 296,104,O,455,HE,104-O-455-HE         | 336,116,OG,309,HD21,116-OG-309-HD21   |
| 297,104,O,455,HH21,104-O-455-HH21     | 337,116,O,116,HG,116-O-116-HG         |
| 298,104,O,127,HG,104-O-127-HG         | 338,116,O,309,HD21,116-O-309-HD21     |
| 299,105,O,455,HH21,105-O-455-HH21     | 339,116,O,119,HE21,116-O-119-HE21     |
| 300,105,O,388,HD1,105-O-388-HD1       | 340,117,O,119,HE21,117-O-119-HE21     |
| 301,105,O,389,H,105-O-389-H           | 341,117,OD1,259,HH,117-OD1-259-HH     |
| 302,106,NH1,388,HD1,106-NH1-388-HD1   | 342,117,OD1,306,HZ1,117-OD1-306-HZ1   |
| 303,107,O,109,H,107-O-109-H           | 343,117,OD1,306,HZ2,117-OD1-306-HZ2   |
| 304,108,OD2,108,H,108-OD2-108-H       | 344,117,O,306,HZ1,117-O-306-HZ1       |
| 305,108,OD1,241,HH12,108-OD1-241-HH12 | 345,117,N,117,HD22,117-N-117-HD22     |
| 306,108,OD1,108,H,108-OD1-108-H       | 346,117,OD1,306,HZ3,117-OD1-306-HZ3   |
| 307,108,O,241,HH12,108-O-241-HH12     | 347,117,OD1,309,HD22,117-OD1-309-HD22 |
| 308,108,OD2,241,HH22,108-OD2-241-HH22 | 348,117,ND2,306,HZ1,117-ND2-306-HZ1   |
| 309,108,OD1,241,HH22,108-OD1-241-HH22 | 349,117,O,306,HZ2,117-O-306-HZ2       |
| 310,108,OD2,241,HH12,108-OD2-241-HH12 | 350,117,O,306,HZ3,117-O-306-HZ3       |
| 311,108,O,241,HH22,108-O-241-HH22     | 351,117,O,119,HE22,117-O-119-HE22     |
| 312,109,O,113,HG1,109-O-113-HG1       | 352,117,O,117,HD22,117-O-117-HD22     |
| 313,109,O,113,H,109-O-113-H           | 353,117,O,119,H,117-O-119-H           |
| 314,109,O,112,H,109-O-112-H           | 354,117,OD1,119,HE21,117-OD1-119-HE21 |
| 315,110,O,114,H,110-O-114-H           | 355,118,O,124,HG,118-O-124-HG         |
| 316,110,O,113,HG1,110-O-113-HG1       | 356,118,O,119,HE21,118-O-119-HE21     |

|                                       |                                       |
|---------------------------------------|---------------------------------------|
| 357,118,O,120,H,118-O-120-H           | 397,126,OD1,124,HG,126-OD1-124-HG     |
| 358,119,O,119,HE21,119-O-119-HE21     | 398,126,OD2,119,HE22,126-OD2-119-HE22 |
| 359,119,OE1,306,HZ1,119-OE1-306-HZ1   | 399,126,O,127,HG,126-O-127-HG         |
| 360,119,O,134,HH12,119-O-134-HH12     | 400,126,OD1,301,HE22,126-OD1-301-HE22 |
| 361,119,O,134,HH22,119-O-134-HH22     | 401,126,OD2,134,HH11,126-OD2-134-HH11 |
| 362,119,OE1,306,HZ3,119-OE1-306-HZ3   | 402,126,OD2,119,HE21,126-OD2-119-HE21 |
| 363,119,O,309,HD21,119-O-309-HD21     | 403,126,OD2,128,H,126-OD2-128-H       |
| 364,119,OE1,117,HD22,119-OE1-117-HD22 | 404,126,OD1,134,HH11,126-OD1-134-HH11 |
| 365,119,OE1,306,HZ2,119-OE1-306-HZ2   | 405,126,OD1,119,HE22,126-OD1-119-HE22 |
| 366,119,OE1,309,HD22,119-OE1-309-HD22 | 406,126,OD2,127,H,126-OD2-127-H       |
| 367,119,O,134,HH21,119-O-134-HH21     | 407,126,OD1,128,H,126-OD1-128-H       |
| 368,119,OE1,309,HD21,119-OE1-309-HD21 | 408,126,OD2,131,H,126-OD2-131-H       |
| 369,119,OE1,124,HG,119-OE1-124-HG     | 409,126,O,128,H,126-O-128-H           |
| 370,119,OE1,134,HH22,119-OE1-134-HH22 | 410,126,OD1,119,HE21,126-OD1-119-HE21 |
| 371,119,OE1,301,HE22,119-OE1-301-HE22 | 411,126,O,455,HH21,126-O-455-HH21     |
| 372,119,OE1,134,HH12,119-OE1-134-HH12 | 412,126,OD2,134,HH12,126-OD2-134-HH12 |
| 373,120,OG,123,H,120-OG-123-H         | 413,126,OD2,301,HE21,126-OD2-301-HE21 |
| 374,120,OG,122,H,120-OG-122-H         | 414,126,OD1,134,HH12,126-OD1-134-HH12 |
| 375,120,O,124,HG,120-O-124-HG         | 415,126,OD1,127,H,126-OD1-127-H       |
| 376,120,O,131,HE1,120-O-131-HE1       | 416,126,OD2,306,HZ3,126-OD2-306-HZ3   |
| 377,120,O,122,H,120-O-122-H           | 417,126,OD1,131,H,126-OD1-131-H       |
| 378,120,O,124,H,120-O-124-H           | 418,127,O,104,HZ2,127-O-104-HZ2       |
| 379,120,O,123,H,120-O-123-H           | 419,127,OG,454,HZ3,127-OG-454-HZ3     |
| 380,121,O,455,HH12,121-O-455-HH12     | 420,127,OG,454,HZ2,127-OG-454-HZ2     |
| 381,121,N,134,HH12,121-N-134-HH12     | 421,127,OG,455,HE,127-OG-455-HE       |
| 382,121,O,131,HE1,121-O-131-HE1       | 422,127,O,127,HG,127-O-127-HG         |
| 383,122,O,106,HH21,122-O-106-HH21     | 423,127,O,104,HZ1,127-O-104-HZ1       |
| 384,122,O,106,HE,122-O-106-HE         | 424,127,O,454,HZ2,127-O-454-HZ2       |
| 385,122,OG,106,HH21,122-OG-106-HH21   | 425,127,O,454,HZ1,127-O-454-HZ1       |
| 386,122,O,455,HH12,122-O-455-HH12     | 426,127,O,104,HZ3,127-O-104-HZ3       |
| 387,122,O,455,HH11,122-O-455-HH11     | 427,127,OG,455,HH21,127-OG-455-HH21   |
| 388,124,O,126,H,124-O-126-H           | 428,127,OG,454,HZ1,127-OG-454-HZ1     |
| 389,124,O,455,HH12,124-O-455-HH12     | 429,127,OG,104,HZ1,127-OG-104-HZ1     |
| 390,124,O,455,HH22,124-O-455-HH22     | 430,127,O,454,HZ3,127-O-454-HZ3       |
| 391,124,OG,119,HE22,124-OG-119-HE22   | 431,128,O,131,H,128-O-131-H           |
| 392,124,OG,126,H,124-OG-126-H         | 432,128,O,132,H,128-O-132-H           |
| 393,125,O,127,HG,125-O-127-HG         | 433,129,O,133,H,129-O-133-H           |
| 394,125,O,127,H,125-O-127-H           | 434,129,O,299,HD21,129-O-299-HD21     |
| 395,126,O,124,HG,126-O-124-HG         | 435,130,O,134,H,130-O-134-H           |
| 396,126,O,455,HH22,126-O-455-HH22     | 436,130,O,133,H,130-O-133-H           |

437,131,O,134,H,131-O-134-H  
438,131,O,135,H,131-O-135-H  
439,132,O,136,H,132-O-136-H  
440,133,O,136,H,133-O-136-H  
441,133,O,137,H,133-O-137-H  
442,134,O,138,H,134-O-138-H  
443,134,NH2,309,HD21,134-NH2-309-HD21  
444,135,O,138,H,135-O-138-H  
445,135,O,139,HE21,135-O-139-HE21  
446,135,O,139,H,135-O-139-H  
447,136,O,140,H,136-O-140-H  
448,136,NH2,299,HD21,136-NH2-299-HD21  
449,136,O,140,HD22,136-O-140-HD22  
450,136,O,139,H,136-O-139-H  
451,137,O,140,H,137-O-140-H  
452,137,O,141,H,137-O-141-H  
453,137,O,140,HD22,137-O-140-HD22  
454,138,O,141,H,138-O-141-H  
455,138,O,142,H,138-O-142-H  
456,139,OE1,136,HH11,139-OE1-136-HH11  
457,139,O,139,HE21,139-O-139-HE21  
458,139,O,143,H,139-O-143-H  
459,139,OE1,135,HH22,139-OE1-135-HH22  
460,139,OE1,143,HZ2,139-OE1-143-HZ2  
461,139,OE1,461,HG1,139-OE1-461-HG1  
462,139,OE1,135,HH21,139-OE1-135-HH21  
463,139,OE1,143,HZ3,139-OE1-143-HZ3  
464,139,OE1,143,HZ1,139-OE1-143-HZ1  
465,139,OE1,135,HH12,139-OE1-135-HH12  
466,139,OE1,135,HE,139-OE1-135-HE  
467,140,OD1,139,HE21,140-OD1-139-HE21  
468,140,O,144,H,140-O-144-H  
469,140,OD1,136,HH11,140-OD1-136-HH11  
470,140,OD1,136,HE,140-OD1-136-HE  
471,140,OD1,136,HH21,140-OD1-136-HH21  
472,140,OD1,143,HZ3,140-OD1-143-HZ3  
473,140,OD1,288,HE2,140-OD1-288-HE2  
474,140,OD1,143,HZ1,140-OD1-143-HZ1  
475,140,OD1,139,HE22,140-OD1-139-HE22  
476,140,O,144,HG,140-O-144-HG  
477,140,OD1,143,HZ2,140-OD1-143-HZ2  
478,141,O,144,HG,141-O-144-HG  
479,141,O,144,H,141-O-144-H  
480,141,O,145,H,141-O-145-H  
481,142,O,145,H,142-O-145-H  
482,142,O,147,H,142-O-147-H  
483,142,O,146,H,142-O-146-H  
484,142,O,146,HG,142-O-146-HG  
485,143,O,146,H,143-O-146-H  
486,143,O,147,H,143-O-147-H  
487,143,O,148,H,143-O-148-H  
488,144,O,144,HG,144-O-144-HG  
489,144,O,158,HH,144-O-158-HH  
490,144,O,148,H,144-O-148-H  
491,144,O,146,H,144-O-146-H  
492,145,O,146,HG,145-O-146-HG  
493,145,O,162,HE2,145-O-162-HE2  
494,146,OG,147,H,146-OG-147-H  
495,146,O,148,H,146-O-148-H  
496,146,O,158,H,146-O-158-H  
497,146,O,159,H,146-O-159-H  
498,148,O,158,H,148-O-158-H  
499,149,OG,154,HG,149-OG-154-HG  
500,149,O,149,HG,149-O-149-HG  
501,149,OG,150,H,149-OG-150-H  
502,149,O,158,HH,149-O-158-HH  
503,150,OD2,153,HG,150-OD2-153-HG  
504,150,O,153,HG,150-O-153-HG  
505,150,OD2,152,H,150-OD2-152-H  
506,150,OD1,152,H,150-OD1-152-H  
507,150,OD1,153,HG,150-OD1-153-HG  
508,150,OD2,165,HZ1,150-OD2-165-HZ1  
509,150,OD1,158,HH,150-OD1-158-HH  
510,150,O,154,HG,150-O-154-HG  
511,150,OD2,153,H,150-OD2-153-H  
512,150,N,149,HG,150-N-149-HG  
513,150,OD2,158,HH,150-OD2-158-HH  
514,150,O,149,HG,150-O-149-HG  
515,150,OD1,153,H,150-OD1-153-H  
516,150,O,153,H,150-O-153-H



|                                       |                                       |
|---------------------------------------|---------------------------------------|
| 517,151,O,153,H,151-O-153-H           | 557,156,OG,153,HG,156-OG-153-HG       |
| 518,152,O,154,H,152-O-154-H           | 558,156,O,150,H,156-O-150-H           |
| 519,152,O,153,HG,152-O-153-HG         | 559,157,O,160,H,157-O-160-H           |
| 520,153,OG,154,H,153-OG-154-H         | 560,157,O,156,HG,157-O-156-HG         |
| 521,153,O,155,H,153-O-155-H           | 561,157,O,161,H,157-O-161-H           |
| 522,153,OG,156,H,153-OG-156-H         | 562,158,O,161,H,158-O-161-H           |
| 523,153,O,156,HG,153-O-156-HG         | 563,158,O,162,H,158-O-162-H           |
| 524,153,OG,156,HG,153-OG-156-HG       | 564,159,O,162,H,159-O-162-H           |
| 525,153,O,156,H,153-O-156-H           | 565,159,O,163,H,159-O-163-H           |
| 526,153,OG,155,HG1,153-OG-155-HG1     | 566,160,OE1,359,H,160-OE1-359-H       |
| 527,153,OG,155,H,153-OG-155-H         | 567,160,OE1,358,HE,160-OE1-358-HE     |
| 528,153,O,154,HG,153-O-154-HG         | 568,160,OE2,356,HH22,160-OE2-356-HH22 |
| 529,154,OG,155,HG1,154-OG-155-HG1     | 569,160,O,164,HG,160-O-164-HG         |
| 530,154,O,155,HG1,154-O-155-HG1       | 570,160,OE2,356,HH12,160-OE2-356-HH12 |
| 531,154,O,154,HG,154-O-154-HG         | 571,160,OE1,358,HH21,160-OE1-358-HH21 |
| 532,154,OG,155,H,154-OG-155-H         | 572,160,O,164,H,160-O-164-H           |
| 533,154,O,149,HG,154-O-149-HG         | 573,160,OE2,359,H,160-OE2-359-H       |
| 534,155,O,149,HG,155-O-149-HG         | 574,160,OE2,356,HH21,160-OE2-356-HH21 |
| 535,155,OG1,358,HH11,155-OG1-358-HH11 | 575,160,OE2,358,HH21,160-OE2-358-HH21 |
| 536,155,O,155,HG1,155-O-155-HG1       | 576,160,OE2,156,HG,160-OE2-156-HG     |
| 537,155,OG1,358,HH22,155-OG1-358-HH22 | 577,160,OE1,356,HH21,160-OE1-356-HH21 |
| 538,155,O,358,HH21,155-O-358-HH21     | 578,160,OE1,356,HH22,160-OE1-356-HH22 |
| 539,155,O,358,HE,155-O-358-HE         | 579,160,OE2,358,HE,160-OE2-358-HE     |
| 540,155,OG1,358,HH12,155-OG1-358-HH12 | 580,160,OE2,157,H,160-OE2-157-H       |
| 541,155,O,360,HG,155-O-360-HG         | 581,160,OE1,356,HH12,160-OE1-356-HH12 |
| 542,155,O,358,HH22,155-O-358-HH22     | 582,160,OE2,356,HE,160-OE2-356-HE     |
| 543,155,OG1,360,HG,155-OG1-360-HG     | 583,160,OE1,157,H,160-OE1-157-H       |
| 544,155,OG1,156,HG,155-OG1-156-HG     | 584,160,OE1,358,HH11,160-OE1-358-HH11 |
| 545,155,OG1,358,HH21,155-OG1-358-HH21 | 585,160,OE1,156,HG,160-OE1-156-HG     |
| 546,155,O,358,HH12,155-O-358-HH12     | 586,161,OE2,156,HG,161-OE2-156-HG     |
| 547,155,OG1,153,HG,155-OG1-153-HG     | 587,161,OE1,165,HZ1,161-OE1-165-HZ1   |
| 548,155,O,157,H,155-O-157-H           | 588,161,OE2,153,HG,161-OE2-153-HG     |
| 549,156,O,149,HG,156-O-149-HG         | 589,161,O,165,HZ2,161-O-165-HZ2       |
| 550,156,OG,356,HH21,156-OG-356-HH21   | 590,161,OE2,356,HH21,161-OE2-356-HH21 |
| 551,156,O,153,HG,156-O-153-HG         | 591,161,OE1,356,HH21,161-OE1-356-HH21 |
| 552,156,OG,155,HG1,156-OG-155-HG1     | 592,161,OE1,356,HE,161-OE1-356-HE     |
| 553,156,OG,358,HH21,156-OG-358-HH21   | 593,161,OE1,153,HG,161-OE1-153-HG     |
| 554,156,OG,356,HH22,156-OG-356-HH22   | 594,161,O,165,HZ1,161-O-165-HZ1       |
| 555,156,OG,358,HH22,156-OG-358-HH22   | 595,161,O,165,H,161-O-165-H           |
| 556,156,OG,358,HH11,156-OG-358-HH11   | 596,161,OE1,165,HZ2,161-OE1-165-HZ2   |

597,161,OE2,356,HH22,161-OE2-356-HH22  
598,161,OE2,356,HE,161-OE2-356-HE  
599,161,OE2,165,HZ1,161-OE2-165-HZ1  
600,161,OE2,165,HZ2,161-OE2-165-HZ2  
601,161,OE1,156,HG,161-OE1-156-HG  
602,161,OE1,356,HH22,161-OE1-356-HH22  
603,161,OE2,165,HZ3,161-OE2-165-HZ3  
604,161,OE2,358,HH22,161-OE2-358-HH22  
605,161,OE1,358,HH12,161-OE1-358-HH12  
606,161,O,165,HZ3,161-O-165-HZ3  
607,161,OE1,165,HZ3,161-OE1-165-HZ3  
608,161,OE1,356,HH12,161-OE1-356-HH12  
609,161,OE2,356,HH12,161-OE2-356-HH12  
610,162,ND1,165,HZ2,162-ND1-165-HZ2  
611,162,O,166,H,162-O-166-H  
612,162,ND1,165,HZ1,162-ND1-165-HZ1  
613,162,ND1,165,HZ3,162-ND1-165-HZ3  
614,162,O,165,H,162-O-165-H  
615,163,O,167,H,163-O-167-H  
616,163,O,166,H,163-O-166-H  
617,164,OG,356,HE,164-OG-356-HE  
618,164,OG,356,HH21,164-OG-356-HH21  
619,164,OG,356,HH11,164-OG-356-HH11  
620,164,O,168,H,164-O-168-H  
621,165,O,168,H,165-O-168-H  
622,165,O,169,H,165-O-169-H  
623,166,O,193,HG,166-O-193-HG  
624,166,OE2,206,HH21,166-OE2-206-HH21  
625,166,OE1,196,HD22,166-OE1-196-HD22  
626,166,OE1,206,HH21,166-OE1-206-HH21  
627,166,OE1,206,HE,166-OE1-206-HE  
628,166,O,170,H,166-O-170-H  
629,166,O,169,H,166-O-169-H  
630,166,OE2,165,HZ1,166-OE2-165-HZ1  
631,166,OE2,206,HE,166-OE2-206-HE  
632,167,O,170,H,167-O-170-H  
633,167,O,171,H,167-O-171-H  
634,168,OE2,356,HH21,168-OE2-356-HH21  
635,168,OE1,477,HE,168-OE1-477-HE  
636,168,OE1,356,HE,168-OE1-356-HE  
637,168,OE1,477,HH12,168-OE1-477-HH12  
638,168,OE1,477,HH21,168-OE1-477-HH21  
639,168,OE1,172,HG,168-OE1-172-HG  
640,168,OE2,477,HH21,168-OE2-477-HH21  
641,168,OE1,477,HH22,168-OE1-477-HH22  
642,168,OE2,165,HZ2,168-OE2-165-HZ2  
643,168,OE2,165,HZ3,168-OE2-165-HZ3  
644,168,OE2,477,HH12,168-OE2-477-HH12  
645,168,OE2,356,HE,168-OE2-356-HE  
646,168,O,172,HG,168-O-172-HG  
647,168,OE2,477,HE,168-OE2-477-HE  
648,168,OE1,356,HH21,168-OE1-356-HH21  
649,168,O,172,H,168-O-172-H  
650,168,OE2,356,HH11,168-OE2-356-HH11  
651,168,OE1,477,HH11,168-OE1-477-HH11  
652,168,O,171,H,168-O-171-H  
653,168,OE2,477,HH22,168-OE2-477-HH22  
654,169,O,172,H,169-O-172-H  
655,169,O,173,HG1,169-O-173-HG1  
656,169,O,173,H,169-O-173-H  
657,169,O,172,HG,169-O-172-HG  
658,170,O,174,H,170-O-174-H  
659,170,O,173,H,170-O-173-H  
660,171,O,174,H,171-O-174-H  
661,171,O,175,H,171-O-175-H  
662,171,O,175,HE21,171-O-175-HE21  
663,172,O,175,HE21,172-O-175-HE21  
664,172,O,176,H,172-O-176-H  
665,173,O,176,H,173-O-176-H  
666,173,OG1,209,HE2,173-OG1-209-HE2  
667,173,O,177,H,173-O-177-H  
668,174,O,178,H,174-O-178-H  
669,174,O,177,H,174-O-177-H  
670,175,O,175,HE21,175-O-175-HE21  
671,175,O,178,H,175-O-178-H  
672,175,O,179,H,175-O-179-H  
673,176,O,179,H,176-O-179-H  
674,176,O,180,H,176-O-180-H  
675,177,O,180,H,177-O-180-H  
676,177,O,183,H,177-O-183-H

|                                       |                                       |
|---------------------------------------|---------------------------------------|
| 677,177,O,182,H,177-O-182-H           | 717,196,OD1,207,H,196-OD1-207-H       |
| 678,178,O,180,H,178-O-180-H           | 718,196,ND2,207,H,196-ND2-207-H       |
| 679,181,O,183,H,181-O-183-H           | 719,197,O,201,H,197-O-201-H           |
| 680,182,O,507,HE21,182-O-507-HE21     | 720,197,O,200,H,197-O-200-H           |
| 681,183,ND1,183,H,183-ND1-183-H       | 721,198,O,202,H,198-O-202-H           |
| 682,183,ND1,507,HE21,183-ND1-507-HE21 | 722,199,O,202,H,199-O-202-H           |
| 683,184,O,506,H,184-O-506-H           | 723,199,O,203,H,199-O-203-H           |
| 684,185,OD1,188,H,185-OD1-188-H       | 724,199,O,204,H,199-O-204-H           |
| 685,185,OD1,187,H,185-OD1-187-H       | 725,199,O,205,H,199-O-205-H           |
| 686,186,O,190,H,186-O-190-H           | 726,200,O,204,H,200-O-204-H           |
| 687,186,O,189,H,186-O-189-H           | 727,201,O,281,H,201-O-281-H           |
| 688,186,O,327,HG,186-O-327-HG         | 728,202,O,281,H,202-O-281-H           |
| 689,187,OH,499,HZ3,187-OH-499-HZ3     | 729,202,O,282,H,202-O-282-H           |
| 690,187,OH,324,HG1,187-OH-324-HG1     | 730,202,O,282,HG1,202-O-282-HG1       |
| 691,187,OH,499,HZ2,187-OH-499-HZ2     | 731,203,O,205,HE,203-O-205-HE         |
| 692,187,O,191,H,187-O-191-H           | 732,203,O,205,HH11,203-O-205-HH11     |
| 693,187,OH,219,HD22,187-OH-219-HD22   | 733,203,O,205,H,203-O-205-H           |
| 694,187,O,190,H,187-O-190-H           | 734,203,O,205,HH21,203-O-205-HH21     |
| 695,187,OH,499,HZ1,187-OH-499-HZ1     | 735,204,O,205,HE,204-O-205-HE         |
| 696,188,O,188,HH11,188-O-188-HH11     | 736,205,NH2,269,HE2,205-NH2-269-HE2   |
| 697,188,O,219,HD21,188-O-219-HD21     | 737,206,O,205,HH21,206-O-205-HH21     |
| 698,188,NH2,185,HD22,188-NH2-185-HD22 | 738,207,OH,205,HH11,207-OH-205-HH11   |
| 699,189,O,209,HE2,189-O-209-HE2       | 739,207,O,196,HD21,207-O-196-HD21     |
| 700,189,OH,188,HH11,189-OH-188-HH11   | 740,208,OD2,206,HH22,208-OD2-206-HH22 |
| 701,189,O,193,HG,189-O-193-HG         | 741,208,O,210,H,208-O-210-H           |
| 702,189,O,192,H,189-O-192-H           | 742,208,O,211,H,208-O-211-H           |
| 703,189,O,193,H,189-O-193-H           | 743,208,OD2,206,HH12,208-OD2-206-HH12 |
| 704,190,O,193,H,190-O-193-H           | 744,208,OD2,209,H,208-OD2-209-H       |
| 705,190,O,193,HG,190-O-193-HG         | 745,208,OD1,210,HD22,208-OD1-210-HD22 |
| 706,190,O,194,H,190-O-194-H           | 746,208,OD2,210,HD22,208-OD2-210-HD22 |
| 707,191,O,195,HG1,191-O-195-HG1       | 747,208,OD1,209,H,208-OD1-209-H       |
| 708,191,O,195,H,191-O-195-H           | 748,208,OD2,210,HD21,208-OD2-210-HD21 |
| 709,192,O,196,H,192-O-196-H           | 749,208,OD2,206,HH11,208-OD2-206-HH11 |
| 710,193,O,197,H,193-O-197-H           | 750,208,OD2,208,H,208-OD2-208-H       |
| 711,193,O,196,H,193-O-196-H           | 751,208,OD2,211,H,208-OD2-211-H       |
| 712,193,OG,209,HE2,193-OG-209-HE2     | 752,208,OD1,206,HH22,208-OD1-206-HH22 |
| 713,194,O,197,H,194-O-197-H           | 753,208,OD1,210,HD21,208-OD1-210-HD21 |
| 714,194,O,198,H,194-O-198-H           | 754,208,OD2,210,H,208-OD2-210-H       |
| 715,195,O,199,H,195-O-199-H           | 755,208,OD1,210,H,208-OD1-210-H       |
| 716,196,O,200,H,196-O-200-H           | 756,208,OD1,208,H,208-OD1-208-H       |

757,208,OD1,206,HH12,208-OD1-206-HH12  
758,209,O,188,HH11,209-O-188-HH11  
759,209,ND1,173,HG1,209-ND1-173-HG1  
760,209,ND1,188,HH12,209-ND1-188-HH12  
761,209,O,212,HE22,209-O-212-HE22  
762,209,O,188,HH12,209-O-188-HH12  
763,209,O,188,HH22,209-O-188-HH22  
764,209,ND1,209,H,209-ND1-209-H  
765,210,O,212,H,210-O-212-H  
766,210,O,210,HD22,210-O-210-HD22  
767,210,OD1,188,HH22,210-OD1-188-HH22  
768,210,O,212,HE21,210-O-212-HE21  
769,210,OD1,188,HH12,210-OD1-188-HH12  
770,211,O,214,H,211-O-214-H  
771,211,ND1,212,H,211-ND1-212-H  
772,211,ND1,214,H,211-ND1-214-H  
773,211,ND1,213,H,211-ND1-213-H  
774,211,O,215,H,211-O-215-H  
775,212,OE1,212,H,212-OE1-212-H  
776,212,O,216,HG,212-O-216-HG  
777,212,O,212,HE21,212-O-212-HE21  
778,212,OE1,216,HG,212-OE1-216-HG  
779,212,O,216,H,212-O-216-H  
780,212,OE1,213,H,212-OE1-213-H  
781,213,OE2,257,HZ3,213-OE2-257-HZ3  
782,213,O,217,H,213-O-217-H  
783,213,O,257,HZ1,213-O-257-HZ1  
784,213,OE2,257,HZ2,213-OE2-257-HZ2  
785,213,OE1,257,HZ3,213-OE1-257-HZ3  
786,213,OE1,216,HG,213-OE1-216-HG  
787,213,OE2,264,HZ3,213-OE2-264-HZ3  
788,213,OE2,213,H,213-OE2-213-H  
789,213,OE1,257,HZ1,213-OE1-257-HZ1  
790,213,OE1,264,HZ1,213-OE1-264-HZ1  
791,213,OE1,213,H,213-OE1-213-H  
792,213,O,216,H,213-O-216-H  
793,213,OE2,264,HZ1,213-OE2-264-HZ1  
794,213,OE2,211,HE2,213-OE2-211-HE2  
795,213,OE2,257,HZ1,213-OE2-257-HZ1  
796,213,OE2,264,HZ2,213-OE2-264-HZ2  
797,213,OE2,212,HE21,213-OE2-212-HE21  
798,213,OE1,257,HZ2,213-OE1-257-HZ2  
799,213,OE2,212,HE22,213-OE2-212-HE22  
800,213,OE1,207,HH,213-OE1-207-HH  
801,213,OE1,212,HE21,213-OE1-212-HE21  
802,213,OE1,264,HZ3,213-OE1-264-HZ3  
803,213,O,216,HG,213-O-216-HG  
804,213,OE1,264,HZ2,213-OE1-264-HZ2  
805,213,OE2,216,HG,213-OE2-216-HG  
806,214,O,217,H,214-O-217-H  
807,214,O,218,H,214-O-218-H  
808,215,O,218,H,215-O-218-H  
809,215,O,220,H,215-O-220-H  
810,215,O,219,H,215-O-219-H  
811,215,O,219,HD22,215-O-219-HD22  
812,216,OG,212,HE21,216-OG-212-HE21  
813,216,O,257,HZ3,216-O-257-HZ3  
814,216,O,221,H,216-O-221-H  
815,216,OG,257,HZ2,216-OG-257-HZ2  
816,216,O,257,HZ1,216-O-257-HZ1  
817,216,O,220,H,216-O-220-H  
818,216,OG,257,HZ1,216-OG-257-HZ1  
819,216,OG,257,HZ3,216-OG-257-HZ3  
820,216,O,222,H,216-O-222-H  
821,216,OG,221,HD22,216-OG-221-HD22  
822,216,O,221,HD22,216-O-221-HD22  
823,216,O,257,HZ2,216-O-257-HZ2  
824,216,O,219,H,216-O-219-H  
825,217,O,222,HD21,217-O-222-HD21  
826,218,O,222,HD21,218-O-222-HD21  
827,219,OD1,188,HH21,219-OD1-188-HH21  
828,219,OD1,188,HE,219-OD1-188-HE  
829,219,O,219,HD22,219-O-219-HD22  
830,219,O,222,H,219-O-222-H  
831,220,O,221,HD22,220-O-221-HD22  
832,220,O,222,H,220-O-222-H  
833,221,OD1,257,HZ1,221-OD1-257-HZ1  
834,221,O,223,H,221-O-223-H  
835,221,O,221,HD22,221-O-221-HD22  
836,221,O,223,HD22,221-O-223-HD22

|                                       |                                       |
|---------------------------------------|---------------------------------------|
| 837,221,OD1,216,HG,221-OD1-216-HG     | 877,230,OG,494,HH,230-OG-494-HH       |
| 838,221,OD1,257,HZ3,221-OD1-257-HZ3   | 878,232,OD1,234,H,232-OD1-234-H       |
| 839,221,OD1,257,HZ2,221-OD1-257-HZ2   | 879,232,OD1,494,HH,232-OD1-494-HH     |
| 840,222,OD1,224,H,222-OD1-224-H       | 880,232,OD1,235,H,232-OD1-235-H       |
| 841,223,O,223,HD22,223-O-223-HD22     | 881,232,O,235,H,232-O-235-H           |
| 842,223,O,226,H,223-O-226-H           | 882,232,O,234,H,232-O-234-H           |
| 843,223,O,227,H,223-O-227-H           | 883,232,O,236,H,232-O-236-H           |
| 844,224,O,227,H,224-O-227-H           | 884,233,O,235,H,233-O-235-H           |
| 845,224,O,226,H,224-O-226-H           | 885,233,O,236,H,233-O-236-H           |
| 846,224,O,228,H,224-O-228-H           | 886,233,O,237,H,233-O-237-H           |
| 847,225,O,229,H,225-O-229-H           | 887,234,O,241,HH11,234-O-241-HH11     |
| 848,225,O,497,H,225-O-497-H           | 888,234,O,237,H,234-O-237-H           |
| 849,225,O,496,H,225-O-496-H           | 889,234,O,241,H,234-O-241-H           |
| 850,226,OE2,57,HZ1,226-OE2-57-HZ1     | 890,235,OD1,111,H,235-OD1-111-H       |
| 851,226,OE1,57,HZ3,226-OE1-57-HZ3     | 891,235,OD2,111,HG1,235-OD2-111-HG1   |
| 852,226,OE1,247,HG,226-OE1-247-HG     | 892,235,OD2,232,HD22,235-OD2-232-HD22 |
| 853,226,OE1,232,HD21,226-OE1-232-HD21 | 893,235,OD1,110,H,235-OD1-110-H       |
| 854,226,OE2,223,HD22,226-OE2-223-HD22 | 894,235,OD1,111,HG1,235-OD1-111-HG1   |
| 855,226,OE2,247,HG,226-OE2-247-HG     | 895,235,OD1,241,HH11,235-OD1-241-HH11 |
| 856,226,OE2,57,HZ2,226-OE2-57-HZ2     | 896,235,OD1,232,HD22,235-OD1-232-HD22 |
| 857,226,OE2,226,H,226-OE2-226-H       | 897,235,O,241,HH11,235-O-241-HH11     |
| 858,226,O,232,HD21,226-O-232-HD21     | 898,235,OD1,241,HH12,235-OD1-241-HH12 |
| 859,226,OE1,57,HZ1,226-OE1-57-HZ1     | 899,235,OD2,111,H,235-OD2-111-H       |
| 860,226,OE2,57,HZ3,226-OE2-57-HZ3     | 900,235,O,241,HH12,235-O-241-HH12     |
| 861,226,O,229,H,226-O-229-H           | 901,235,OD2,110,H,235-OD2-110-H       |
| 862,226,OE1,223,HD22,226-OE1-223-HD22 | 902,235,OD1,241,HH22,235-OD1-241-HH22 |
| 863,226,O,232,HD22,226-O-232-HD22     | 903,235,OD2,241,HH11,235-OD2-241-HH11 |
| 864,226,OE1,226,H,226-OE1-226-H       | 904,236,O,80,H,236-O-80-H             |
| 865,226,OE1,57,HZ2,226-OE1-57-HZ2     | 905,236,O,81,HG1,236-O-81-HG1         |
| 866,227,O,232,HD22,227-O-232-HD22     | 906,237,O,240,H,237-O-240-H           |
| 867,227,O,229,H,227-O-229-H           | 907,237,O,241,H,237-O-241-H           |
| 868,228,O,230,H,228-O-230-H           | 908,238,O,241,H,238-O-241-H           |
| 869,228,O,232,HD21,228-O-232-HD21     | 909,238,O,242,H,238-O-242-H           |
| 870,228,O,496,H,228-O-496-H           | 910,238,O,241,HE,238-O-241-HE         |
| 871,229,O,494,HH,229-O-494-HH         | 911,239,O,243,H,239-O-243-H           |
| 872,229,O,232,HD22,229-O-232-HD22     | 912,239,O,241,H,239-O-241-H           |
| 873,229,O,232,H,229-O-232-H           | 913,239,O,242,H,239-O-242-H           |
| 874,229,N,232,HD21,229-N-232-HD21     | 914,240,O,245,HD21,240-O-245-HD21     |
| 875,230,O,494,HH,230-O-494-HH         | 915,240,O,242,H,240-O-242-H           |
| 876,230,OG,231,H,230-OG-231-H         | 916,240,O,245,HD22,240-O-245-HD22     |

|                                       |                                       |
|---------------------------------------|---------------------------------------|
| 917,240,O,243,H,240-O-243-H           | 957,253,OD1,252,HZ1,253-OD1-252-HZ1   |
| 918,241,NH1,110,H,241-NH1-110-H       | 958,253,OD2,221,HD21,253-OD2-221-HD21 |
| 919,242,OH,241,HH21,242-OH-241-HH21   | 959,253,OD2,252,HZ1,253-OD2-252-HZ1   |
| 920,242,OH,241,HE,242-OH-241-HE       | 960,253,OD1,252,HZ2,253-OD1-252-HZ2   |
| 921,243,O,245,H,243-O-245-H           | 961,253,OD2,257,HZ3,253-OD2-257-HZ3   |
| 922,243,O,245,HD22,243-O-245-HD22     | 962,253,OD2,252,HZ3,253-OD2-252-HZ3   |
| 923,244,O,249,HD21,244-O-249-HD21     | 963,253,OD1,257,HZ1,253-OD1-257-HZ1   |
| 924,245,OD1,248,H,245-OD1-248-H       | 964,253,OD2,257,HZ1,253-OD2-257-HZ1   |
| 925,245,OD1,247,H,245-OD1-247-H       | 965,253,OD1,257,HZ3,253-OD1-257-HZ3   |
| 926,245,O,248,H,245-O-248-H           | 966,253,OD2,257,HZ2,253-OD2-257-HZ2   |
| 927,245,O,249,H,245-O-249-H           | 967,253,OD1,252,HZ3,253-OD1-252-HZ3   |
| 928,245,O,249,HD22,245-O-249-HD22     | 968,253,O,257,H,253-O-257-H           |
| 929,245,OD1,247,HG,245-OD1-247-HG     | 969,253,OD1,257,HZ2,253-OD1-257-HZ2   |
| 930,245,ND2,248,H,245-ND2-248-H       | 970,253,OD2,252,HZ2,253-OD2-252-HZ2   |
| 931,246,O,249,H,246-O-249-H           | 971,253,O,256,H,253-O-256-H           |
| 932,246,O,250,H,246-O-250-H           | 972,253,O,257,HZ2,253-O-257-HZ2       |
| 933,247,O,250,H,247-O-250-H           | 973,253,O,257,HZ3,253-O-257-HZ3       |
| 934,247,O,223,HD21,247-O-223-HD21     | 974,254,O,257,H,254-O-257-H           |
| 935,247,OG,245,HD21,247-OG-245-HD21   | 975,254,O,258,H,254-O-258-H           |
| 936,247,O,251,H,247-O-251-H           | 976,255,OD1,116,H,255-OD1-116-H       |
| 937,247,OG,223,HD22,247-OG-223-HD22   | 977,255,N,255,HD22,255-N-255-HD22     |
| 938,248,O,251,H,248-O-251-H           | 978,255,O,259,H,255-O-259-H           |
| 939,248,O,252,H,248-O-252-H           | 979,255,O,258,H,255-O-258-H           |
| 940,249,OD1,252,HZ3,249-OD1-252-HZ3   | 980,256,OE1,257,HZ2,256-OE1-257-HZ2   |
| 941,249,OD1,252,HZ2,249-OD1-252-HZ2   | 981,256,OE1,252,HZ3,256-OE1-252-HZ3   |
| 942,249,OD1,252,HZ1,249-OD1-252-HZ1   | 982,256,OE1,257,HZ1,256-OE1-257-HZ1   |
| 943,249,O,253,H,249-O-253-H           | 983,256,OE1,117,HD21,256-OE1-117-HD21 |
| 944,249,O,252,H,249-O-252-H           | 984,256,O,259,H,256-O-259-H           |
| 945,249,OD1,245,H,249-OD1-245-H       | 985,256,OE1,257,HZ3,256-OE1-257-HZ3   |
| 946,249,O,249,HD22,249-O-249-HD22     | 986,256,O,260,H,256-O-260-H           |
| 947,250,O,253,H,250-O-253-H           | 987,256,O,260,HG,256-O-260-HG         |
| 948,250,O,223,HD21,250-O-223-HD21     | 988,256,OE2,257,HZ3,256-OE2-257-HZ3   |
| 949,250,O,254,H,250-O-254-H           | 989,256,OE2,257,HZ2,256-OE2-257-HZ2   |
| 950,251,O,254,H,251-O-254-H           | 990,256,OE2,252,HZ1,256-OE2-252-HZ1   |
| 951,251,O,255,HD22,251-O-255-HD22     | 991,256,OE2,260,HG,256-OE2-260-HG     |
| 952,251,N,223,HD21,251-N-223-HD21     | 992,256,OE2,257,HZ1,256-OE2-257-HZ1   |
| 953,251,O,255,H,251-O-255-H           | 993,256,OE1,260,HG,256-OE1-260-HG     |
| 954,252,O,256,H,252-O-256-H           | 994,256,OE2,259,HH,256-OE2-259-HH     |
| 955,252,O,255,H,252-O-255-H           | 995,256,OE2,252,HZ2,256-OE2-252-HZ2   |
| 956,253,OD2,249,HD21,253-OD2-249-HD21 | 996,256,OE2,252,HZ3,256-OE2-252-HZ3   |

|                                       |                                        |
|---------------------------------------|----------------------------------------|
| 997,256,OE1,252,HZ1,256-OE1-252-HZ1   | 1037,263,O,268,H,263-O-268-H           |
| 998,256,OE1,252,HZ2,256-OE1-252-HZ2   | 1038,263,OE1,267,H,263-OE1-267-H       |
| 999,256,OE2,117,HD21,256-OE2-117-HD21 | 1039,263,OE1,264,HZ1,263-OE1-264-HZ1   |
| 1000,257,O,260,H,257-O-260-H          | 1040,264,O,267,H,264-O-267-H           |
| 1001,257,O,260,HG,257-O-260-HG        | 1041,264,O,205,HH12,264-O-205-HH12     |
| 1002,257,O,261,H,257-O-261-H          | 1042,264,O,268,H,264-O-268-H           |
| 1003,258,O,262,H,258-O-262-H          | 1043,264,O,205,HH22,264-O-205-HH22     |
| 1004,258,O,261,H,258-O-261-H          | 1044,265,O,205,HH21,265-O-205-HH21     |
| 1005,259,OH,119,HE22,259-OH-119-HE22  | 1045,265,O,205,HH22,265-O-205-HH22     |
| 1006,259,OH,117,H,259-OH-117-H        | 1046,265,O,268,H,265-O-268-H           |
| 1007,259,OH,117,HD22,259-OH-117-HD22  | 1047,265,O,269,H,265-O-269-H           |
| 1008,259,OH,309,HD21,259-OH-309-HD21  | 1048,265,O,205,HH12,265-O-205-HH12     |
| 1009,259,OH,117,HD21,259-OH-117-HD21  | 1049,266,O,270,H,266-O-270-H           |
| 1010,259,O,263,H,259-O-263-H          | 1050,266,O,269,H,266-O-269-H           |
| 1011,259,OH,116,HG,259-OH-116-HG      | 1051,267,O,271,HZ2,267-O-271-HZ2       |
| 1012,259,O,262,H,259-O-262-H          | 1052,267,O,270,H,267-O-270-H           |
| 1013,259,OH,309,HD22,259-OH-309-HD22  | 1053,267,O,271,HZ1,267-O-271-HZ1       |
| 1014,259,OH,263,HE21,259-OH-263-HE21  | 1054,267,O,269,H,267-O-269-H           |
| 1015,259,O,263,HE21,259-O-263-HE21    | 1055,267,O,271,H,267-O-271-H           |
| 1016,260,O,264,HZ3,260-O-264-HZ3      | 1056,267,O,271,HZ3,267-O-271-HZ3       |
| 1017,260,OG,264,HZ3,260-OG-264-HZ3    | 1057,268,OE1,264,HZ1,268-OE1-264-HZ1   |
| 1018,260,O,264,H,260-O-264-H          | 1058,268,OE1,267,HZ3,268-OE1-267-HZ3   |
| 1019,260,O,264,HZ2,260-O-264-HZ2      | 1059,268,OE2,264,HZ3,268-OE2-264-HZ3   |
| 1020,260,OG,264,HZ2,260-OG-264-HZ2    | 1060,268,OE1,267,HZ2,268-OE1-267-HZ2   |
| 1021,260,OG,264,HZ1,260-OG-264-HZ1    | 1061,268,OE2,264,HZ2,268-OE2-264-HZ2   |
| 1022,261,O,264,H,261-O-264-H          | 1062,268,OE1,264,HZ3,268-OE1-264-HZ3   |
| 1023,261,O,265,H,261-O-265-H          | 1063,268,OE2,264,HZ1,268-OE2-264-HZ1   |
| 1024,262,O,265,H,262-O-265-H          | 1064,268,OE2,271,HZ3,268-OE2-271-HZ3   |
| 1025,262,O,267,H,262-O-267-H          | 1065,268,OE1,271,HZ3,268-OE1-271-HZ3   |
| 1026,262,O,266,H,262-O-266-H          | 1066,268,OE2,267,HZ2,268-OE2-267-HZ2   |
| 1027,263,OE1,267,HZ2,263-OE1-267-HZ2  | 1067,268,OE1,271,HZ1,268-OE1-271-HZ1   |
| 1028,263,NE2,259,HH,263-NE2-259-HH    | 1068,268,OE1,263,HE21,268-OE1-263-HE21 |
| 1029,263,OE1,267,HZ3,263-OE1-267-HZ3  | 1069,268,OE1,205,HH12,268-OE1-205-HH12 |
| 1030,263,OE1,267,HZ1,263-OE1-267-HZ1  | 1070,268,OE1,267,HZ1,268-OE1-267-HZ1   |
| 1031,263,O,267,HZ1,263-O-267-HZ1      | 1071,268,OE2,263,HE21,268-OE2-263-HE21 |
| 1032,263,O,266,H,263-O-266-H          | 1072,268,OE1,263,HE22,268-OE1-263-HE22 |
| 1033,263,O,267,H,263-O-267-H          | 1073,268,OE2,271,HZ2,268-OE2-271-HZ2   |
| 1034,263,O,263,HE21,263-O-263-HE21    | 1074,268,O,271,HZ3,268-O-271-HZ3       |
| 1035,263,OE1,264,HZ3,263-OE1-264-HZ3  | 1075,268,OE1,264,HZ2,268-OE1-264-HZ2   |
| 1036,263,OE1,259,HH,263-OE1-259-HH    | 1076,268,OE1,271,HZ2,268-OE1-271-HZ2   |

|                                        |                                        |
|----------------------------------------|----------------------------------------|
| 1077,268,O,271,HZ2,268-O-271-HZ2       | 1117,274,O,276,H,274-O-276-H           |
| 1078,268,O,272,H,268-O-272-H           | 1118,275,O,277,H,275-O-277-H           |
| 1079,268,O,271,HZ1,268-O-271-HZ1       | 1119,276,O,278,H,276-O-278-H           |
| 1080,268,OE2,205,HH11,268-OE2-205-HH11 | 1120,277,ND1,278,H,277-ND1-278-H       |
| 1081,268,OE2,205,HH22,268-OE2-205-HH22 | 1121,280,OD1,282,HG1,280-OD1-282-HG1   |
| 1082,268,OE2,267,HZ1,268-OE2-267-HZ1   | 1122,280,OD2,282,HG1,280-OD2-282-HG1   |
| 1083,268,O,271,H,268-O-271-H           | 1123,280,O,284,HG,280-O-284-HG         |
| 1084,268,OE2,267,HZ3,268-OE2-267-HZ3   | 1124,280,OD1,205,HH21,280-OD1-205-HH21 |
| 1085,268,OE1,205,HH22,268-OE1-205-HH22 | 1125,280,OD2,283,H,280-OD2-283-H       |
| 1086,268,OE2,205,HH12,268-OE2-205-HH12 | 1126,280,OD2,282,H,280-OD2-282-H       |
| 1087,268,OE1,269,HE2,268-OE1-269-HE2   | 1127,280,OD1,283,H,280-OD1-283-H       |
| 1088,268,OE1,205,HH11,268-OE1-205-HH11 | 1128,280,OD1,282,H,280-OD1-282-H       |
| 1089,268,O,272,HG1,268-O-272-HG1       | 1129,280,O,284,H,280-O-284-H           |
| 1090,268,OE2,271,HZ1,268-OE2-271-HZ1   | 1130,280,OD2,269,HE2,280-OD2-269-HE2   |
| 1091,268,OE2,205,HE,268-OE2-205-HE     | 1131,280,OD1,269,HE2,280-OD1-269-HE2   |
| 1092,269,O,273,H,269-O-273-H           | 1132,280,O,283,H,280-O-283-H           |
| 1093,269,O,279,HH22,269-O-279-HH22     | 1133,281,O,284,H,281-O-284-H           |
| 1094,269,O,279,HH12,269-O-279-HH12     | 1134,281,O,284,HG,281-O-284-HG         |
| 1095,269,O,272,H,269-O-272-H           | 1135,281,O,285,H,281-O-285-H           |
| 1096,269,ND1,205,HH12,269-ND1-205-HH12 | 1136,282,O,286,H,282-O-286-H           |
| 1097,269,O,272,HG1,269-O-272-HG1       | 1137,282,O,285,H,282-O-285-H           |
| 1098,269,ND1,205,HH21,269-ND1-205-HH21 | 1138,283,O,286,H,283-O-286-H           |
| 1099,269,ND1,205,HH22,269-ND1-205-HH22 | 1139,283,OD2,279,HH21,283-OD2-279-HH21 |
| 1100,270,O,272,H,270-O-272-H           | 1140,283,OD1,279,HH21,283-OD1-279-HH21 |
| 1101,270,O,273,H,270-O-273-H           | 1141,283,OD2,279,H,283-OD2-279-H       |
| 1102,270,OH,290,HE21,270-OH-290-HE21   | 1142,283,O,287,H,283-O-287-H           |
| 1103,270,OH,293,HE22,270-OH-293-HE22   | 1143,283,OD1,279,HE,283-OD1-279-HE     |
| 1104,271,O,273,H,271-O-273-H           | 1144,283,OD1,269,HE2,283-OD1-269-HE2   |
| 1105,271,O,271,HZ1,271-O-271-HZ1       | 1145,283,OD2,279,HE,283-OD2-279-HE     |
| 1106,272,OG1,279,HH12,272-OG1-279-HH12 | 1146,284,O,284,HG,284-O-284-HG         |
| 1107,272,O,279,HH22,272-O-279-HH22     | 1147,284,O,287,H,284-O-287-H           |
| 1108,272,OG1,279,HH22,272-OG1-279-HH22 | 1148,284,O,288,H,284-O-288-H           |
| 1109,272,O,279,HH12,272-O-279-HH12     | 1149,285,O,288,H,285-O-288-H           |
| 1110,274,OE2,275,H,274-OE2-275-H       | 1150,285,O,289,H,285-O-289-H           |
| 1111,274,O,277,H,274-O-277-H           | 1151,286,O,289,H,286-O-289-H           |
| 1112,274,OE1,275,H,274-OE1-275-H       | 1152,286,O,290,H,286-O-290-H           |
| 1113,274,OE2,276,H,274-OE2-276-H       | 1153,286,O,290,HE21,286-O-290-HE21     |
| 1114,274,OE1,277,H,274-OE1-277-H       | 1154,286,O,290,HE22,286-O-290-HE22     |
| 1115,274,O,278,H,274-O-278-H           | 1155,287,OE1,275,HZ2,287-OE1-275-HZ2   |
| 1116,274,OE1,276,H,274-OE1-276-H       | 1156,287,OE2,284,HG,287-OE2-284-HG     |



|                                        |                                        |
|----------------------------------------|----------------------------------------|
| 1157,287,O,291,H,287-O-291-H           | 1197,291,OE2,275,HZ1,291-OE2-275-HZ1   |
| 1158,287,OE2,275,HZ1,287-OE2-275-HZ1   | 1198,291,OE1,290,HE22,291-OE1-290-HE22 |
| 1159,287,OE2,290,HE21,287-OE2-290-HE21 | 1199,291,OE1,293,HE22,291-OE1-293-HE22 |
| 1160,287,OE2,275,HZ2,287-OE2-275-HZ2   | 1200,291,OE2,293,HE22,291-OE2-293-HE22 |
| 1161,287,OE1,275,HZ3,287-OE1-275-HZ3   | 1201,291,OE2,275,HZ3,291-OE2-275-HZ3   |
| 1162,287,OE2,275,HZ3,287-OE2-275-HZ3   | 1202,291,O,293,H,291-O-293-H           |
| 1163,287,O,290,H,287-O-290-H           | 1203,291,OE1,290,HE21,291-OE1-290-HE21 |
| 1164,287,OE1,275,HZ1,287-OE1-275-HZ1   | 1204,291,OE1,275,HZ3,291-OE1-275-HZ3   |
| 1165,287,O,275,HZ3,287-O-275-HZ3       | 1205,291,OE1,275,HZ2,291-OE1-275-HZ2   |
| 1166,288,O,292,HZ1,288-O-292-HZ1       | 1206,292,O,294,H,292-O-294-H           |
| 1167,288,O,292,HZ3,288-O-292-HZ3       | 1207,292,O,299,HD22,292-O-299-HD22     |
| 1168,288,O,292,HZ2,288-O-292-HZ2       | 1208,292,O,295,H,292-O-295-H           |
| 1169,288,O,292,H,288-O-292-H           | 1209,292,O,297,HD22,292-O-297-HD22     |
| 1170,288,O,291,H,288-O-291-H           | 1210,293,OE1,290,HE22,293-OE1-290-HE22 |
| 1171,289,O,292,HZ2,289-O-292-HZ2       | 1211,293,OE1,293,H,293-OE1-293-H       |
| 1172,289,O,293,H,289-O-293-H           | 1212,293,OE1,290,HE21,293-OE1-290-HE21 |
| 1173,289,O,292,HZ3,289-O-292-HZ3       | 1213,293,O,293,HE21,293-O-293-HE21     |
| 1174,289,O,292,HZ1,289-O-292-HZ1       | 1214,293,O,295,H,293-O-295-H           |
| 1175,289,O,293,HE21,289-O-293-HE21     | 1215,295,OD2,297,H,295-OD2-297-H       |
| 1176,289,O,292,H,289-O-292-H           | 1216,295,OD1,299,H,295-OD1-299-H       |
| 1177,290,O,293,HE21,290-O-293-HE21     | 1217,295,OD2,288,HE2,295-OD2-288-HE2   |
| 1178,290,O,292,H,290-O-292-H           | 1218,295,OD1,298,H,295-OD1-298-H       |
| 1179,290,OE1,275,HZ1,290-OE1-275-HZ1   | 1219,295,OD2,297,HD21,295-OD2-297-HD21 |
| 1180,290,NE2,275,HZ2,290-NE2-275-HZ2   | 1220,295,OD2,136,HE,295-OD2-136-HE     |
| 1181,290,OE1,293,HE21,290-OE1-293-HE21 | 1221,295,OD1,136,HE,295-OD1-136-HE     |
| 1182,290,O,293,HE22,290-O-293-HE22     | 1222,295,O,298,H,295-O-298-H           |
| 1183,290,OE1,293,HE22,290-OE1-293-HE22 | 1223,295,OD2,136,HH21,295-OD2-136-HH21 |
| 1184,290,OE1,275,HZ3,290-OE1-275-HZ3   | 1224,295,OD2,296,H,295-OD2-296-H       |
| 1185,290,O,290,HE21,290-O-290-HE21     | 1225,295,O,297,H,295-O-297-H           |
| 1186,290,O,294,H,290-O-294-H           | 1226,295,OD1,136,HH21,295-OD1-136-HH21 |
| 1187,290,OE1,270,HH,290-OE1-270-HH     | 1227,295,OD2,299,HD21,295-OD2-299-HD21 |
| 1188,290,O,293,H,290-O-293-H           | 1228,295,OD1,299,HD22,295-OD1-299-HD22 |
| 1189,290,NE2,275,HZ1,290-NE2-275-HZ1   | 1229,295,OD1,297,HD21,295-OD1-297-HD21 |
| 1190,290,OE1,275,HZ2,290-OE1-275-HZ2   | 1230,295,O,297,HD21,295-O-297-HD21     |
| 1191,291,O,295,H,291-O-295-H           | 1231,295,OD1,297,H,295-OD1-297-H       |
| 1192,291,OE2,290,HE21,291-OE2-290-HE21 | 1232,295,OD1,288,HE2,295-OD1-288-HE2   |
| 1193,291,OE2,290,HE22,291-OE2-290-HE22 | 1233,295,OD1,299,HD21,295-OD1-299-HD21 |
| 1194,291,O,294,H,291-O-294-H           | 1234,295,OD1,296,H,295-OD1-296-H       |
| 1195,291,OE1,275,HZ1,291-OE1-275-HZ1   | 1235,296,OE2,297,HD22,296-OE2-297-HD22 |
| 1196,291,OE2,275,HZ2,291-OE2-275-HZ2   | 1236,296,OE2,140,HD21,296-OE2-140-HD21 |

|                                        |                                        |
|----------------------------------------|----------------------------------------|
| 1237,296,O,297,HD21,296-O-297-HD21     | 1277,299,O,297,HD22,299-O-297-HD22     |
| 1238,296,OE1,140,HD21,296-OE1-140-HD21 | 1278,299,OD1,136,HH22,299-OD1-136-HH22 |
| 1239,296,OE2,297,HD21,296-OE2-297-HD21 | 1279,299,OD1,301,H,299-OD1-301-H       |
| 1240,296,O,298,H,296-O-298-H           | 1280,299,OD1,301,HE21,299-OD1-301-HE21 |
| 1241,296,OE1,136,HH12,296-OE1-136-HH12 | 1281,299,OD1,297,HD22,299-OD1-297-HD22 |
| 1242,296,OE2,136,HH22,296-OE2-136-HH22 | 1282,300,O,303,H,300-O-303-H           |
| 1243,296,OE2,136,HH12,296-OE2-136-HH12 | 1283,300,O,306,HZ1,300-O-306-HZ1       |
| 1244,296,OE1,296,H,296-OE1-296-H       | 1284,300,O,301,HE21,300-O-301-HE21     |
| 1245,296,OE1,136,HH11,296-OE1-136-HH11 | 1285,300,O,302,H,300-O-302-H           |
| 1246,296,OE2,296,H,296-OE2-296-H       | 1286,300,O,292,HZ2,300-O-292-HZ2       |
| 1247,296,OE1,136,HH22,296-OE1-136-HH22 | 1287,300,O,306,HZ3,300-O-306-HZ3       |
| 1248,296,OE1,297,HD21,296-OE1-297-HD21 | 1288,300,O,292,HZ1,300-O-292-HZ1       |
| 1249,297,OD1,136,HH12,297-OD1-136-HH12 | 1289,300,O,306,HZ2,300-O-306-HZ2       |
| 1250,297,O,297,HD21,297-O-297-HD21     | 1290,300,O,303,HG,300-O-303-HG         |
| 1251,297,OD1,301,HE22,297-OD1-301-HE22 | 1291,300,O,292,HZ3,300-O-292-HZ3       |
| 1252,297,OD1,299,H,297-OD1-299-H       | 1292,301,O,306,HZ2,301-O-306-HZ2       |
| 1253,297,O,299,HD22,297-O-299-HD22     | 1293,301,OE1,299,HD22,301-OE1-299-HD22 |
| 1254,297,ND2,136,HH22,297-ND2-136-HH22 | 1294,301,OE1,306,HZ3,301-OE1-306-HZ3   |
| 1255,297,OD1,299,HD22,297-OD1-299-HD22 | 1295,301,OE1,119,HE22,301-OE1-119-HE22 |
| 1256,297,OD1,292,HZ1,297-OD1-292-HZ1   | 1296,301,O,306,HZ3,301-O-306-HZ3       |
| 1257,297,OD1,136,HH22,297-OD1-136-HH22 | 1297,301,OE1,306,HZ2,301-OE1-306-HZ2   |
| 1258,297,O,299,H,297-O-299-H           | 1298,301,OE1,301,H,301-OE1-301-H       |
| 1259,297,OD1,136,HH21,297-OD1-136-HH21 | 1299,301,O,301,HE21,301-O-301-HE21     |
| 1260,297,ND2,297,H,297-ND2-297-H       | 1300,301,OE1,297,HD22,301-OE1-297-HD22 |
| 1261,297,OD1,299,HD21,297-OD1-299-HD21 | 1301,301,OE1,299,HD21,301-OE1-299-HD21 |
| 1262,297,OD1,298,H,297-OD1-298-H       | 1302,301,O,306,HZ1,301-O-306-HZ1       |
| 1263,297,ND2,299,H,297-ND2-299-H       | 1303,301,O,303,H,301-O-303-H           |
| 1264,297,OD1,292,HZ3,297-OD1-292-HZ3   | 1304,301,O,303,HG,301-O-303-HG         |
| 1265,298,O,292,HZ2,298-O-292-HZ2       | 1305,301,OE1,300,H,301-OE1-300-H       |
| 1266,298,O,292,HZ1,298-O-292-HZ1       | 1306,302,O,292,HZ1,302-O-292-HZ1       |
| 1267,298,O,292,HZ3,298-O-292-HZ3       | 1307,302,O,292,HZ2,302-O-292-HZ2       |
| 1268,298,O,300,H,298-O-300-H           | 1308,302,O,292,HZ3,302-O-292-HZ3       |
| 1269,299,O,292,HZ1,299-O-292-HZ1       | 1309,302,O,288,HE2,302-O-288-HE2       |
| 1270,299,O,302,H,299-O-302-H           | 1310,303,O,288,HE2,303-O-288-HE2       |
| 1271,299,O,292,HZ2,299-O-292-HZ2       | 1311,303,O,306,H,303-O-306-H           |
| 1272,299,OD1,297,HD21,299-OD1-297-HD21 | 1312,303,OG,306,HZ2,303-OG-306-HZ2     |
| 1273,299,OD1,299,H,299-OD1-299-H       | 1313,303,OG,306,HZ3,303-OG-306-HZ3     |
| 1274,299,O,292,HZ3,299-O-292-HZ3       | 1314,303,OG,306,HZ1,303-OG-306-HZ1     |
| 1275,299,OD1,288,HE2,299-OD1-288-HE2   | 1315,303,O,307,H,303-O-307-H           |
| 1276,299,OD1,302,H,299-OD1-302-H       | 1316,303,OG,306,H,303-OG-306-H         |

|                                        |                                        |
|----------------------------------------|----------------------------------------|
| 1317,303,OG,305,H,303-OG-305-H         | 1357,305,OE1,267,HZ1,305-OE1-267-HZ1   |
| 1318,303,OG,292,HZ2,303-OG-292-HZ2     | 1358,305,OE1,267,HZ2,305-OE1-267-HZ2   |
| 1319,304,OD2,293,HE22,304-OD2-293-HE22 | 1359,305,O,309,H,305-O-309-H           |
| 1320,304,OD1,270,HH,304-OD1-270-HH     | 1360,305,OE2,306,HZ3,305-OE2-306-HZ3   |
| 1321,304,O,307,H,304-O-307-H           | 1361,305,OE1,306,HZ3,305-OE1-306-HZ3   |
| 1322,304,OD2,290,HE22,304-OD2-290-HE22 | 1362,305,OE2,305,H,305-OE2-305-H       |
| 1323,304,OD2,292,HZ2,304-OD2-292-HZ2   | 1363,305,O,307,H,305-O-307-H           |
| 1324,304,OD1,293,HE22,304-OD1-293-HE22 | 1364,305,O,117,HD22,305-O-117-HD22     |
| 1325,304,OD1,305,H,304-OD1-305-H       | 1365,305,OE1,259,HH,305-OE1-259-HH     |
| 1326,304,OD1,293,HE21,304-OD1-293-HE21 | 1366,305,OE1,119,HE22,305-OE1-119-HE22 |
| 1327,304,OD1,304,H,304-OD1-304-H       | 1367,305,OE2,119,HE22,305-OE2-119-HE22 |
| 1328,304,OD2,305,H,304-OD2-305-H       | 1368,305,OE1,117,HD21,305-OE1-117-HD21 |
| 1329,304,OD2,292,HZ3,304-OD2-292-HZ3   | 1369,305,OE2,263,HE21,305-OE2-263-HE21 |
| 1330,304,OD1,292,HZ3,304-OD1-292-HZ3   | 1370,305,OE1,117,HD22,305-OE1-117-HD22 |
| 1331,304,OD2,292,HZ1,304-OD2-292-HZ1   | 1371,305,OE1,119,HE21,305-OE1-119-HE21 |
| 1332,304,OD1,292,HZ1,304-OD1-292-HZ1   | 1372,305,OE2,117,HD22,305-OE2-117-HD22 |
| 1333,304,OD2,304,H,304-OD2-304-H       | 1373,305,OE1,305,H,305-OE1-305-H       |
| 1334,304,OD2,270,HH,304-OD2-270-HH     | 1374,305,OE2,303,HG,305-OE2-303-HG     |
| 1335,304,O,308,H,304-O-308-H           | 1375,306,O,309,H,306-O-309-H           |
| 1336,304,OD2,288,HE2,304-OD2-288-HE2   | 1376,306,O,134,HH21,306-O-134-HH21     |
| 1337,304,OD1,292,HZ2,304-OD1-292-HZ2   | 1377,306,O,119,HE21,306-O-119-HE21     |
| 1338,305,OE2,259,HH,305-OE2-259-HH     | 1378,306,O,134,HE,306-O-134-HE         |
| 1339,305,OE1,267,HZ3,305-OE1-267-HZ3   | 1379,307,O,310,H,307-O-310-H           |
| 1340,305,OE2,267,HZ1,305-OE2-267-HZ1   | 1380,308,O,311,H,308-O-311-H           |
| 1341,305,OE2,306,HZ1,305-OE2-306-HZ1   | 1381,309,OD1,134,HE,309-OD1-134-HE     |
| 1342,305,OE2,309,HD21,305-OE2-309-HD21 | 1382,309,O,313,H,309-O-313-H           |
| 1343,305,OE1,263,HE22,305-OE1-263-HE22 | 1383,309,OD1,263,HE22,309-OD1-263-HE22 |
| 1344,305,OE1,306,HZ1,305-OE1-306-HZ1   | 1384,309,O,312,H,309-O-312-H           |
| 1345,305,OE2,267,HZ2,305-OE2-267-HZ2   | 1385,309,OD1,134,HH21,309-OD1-134-HH21 |
| 1346,305,OE2,119,HE21,305-OE2-119-HE21 | 1386,309,OD1,134,HH22,309-OD1-134-HH22 |
| 1347,305,OE1,306,HZ2,305-OE1-306-HZ2   | 1387,309,ND2,134,HH21,309-ND2-134-HH21 |
| 1348,305,OE2,306,HZ2,305-OE2-306-HZ2   | 1388,309,OD1,306,HZ1,309-OD1-306-HZ1   |
| 1349,305,OE1,303,HG,305-OE1-303-HG     | 1389,309,OD1,119,HE22,309-OD1-119-HE22 |
| 1350,305,OE2,263,HE22,305-OE2-263-HE22 | 1390,309,O,309,HD22,309-O-309-HD22     |
| 1351,305,OE1,306,H,305-OE1-306-H       | 1391,309,OD1,116,HG,309-OD1-116-HG     |
| 1352,305,OE2,117,HD21,305-OE2-117-HD21 | 1392,309,OD1,119,HE21,309-OD1-119-HE21 |
| 1353,305,O,309,HD21,305-O-309-HD21     | 1393,309,OD1,117,HD21,309-OD1-117-HD21 |
| 1354,305,O,309,HD22,305-O-309-HD22     | 1394,309,OD1,259,HH,309-OD1-259-HH     |
| 1355,305,OE2,267,HZ3,305-OE2-267-HZ3   | 1395,309,OD1,263,HE21,309-OD1-263-HE21 |
| 1356,305,OE1,309,HD21,305-OE1-309-HD21 | 1396,310,O,313,H,310-O-313-H           |

|                                        |                                        |
|----------------------------------------|----------------------------------------|
| 1397,310,O,314,H,310-O-314-H           | 1437,320,O,324,H,320-O-324-H           |
| 1398,311,O,315,H,311-O-315-H           | 1438,320,OD1,187,HH,320-OD1-187-HH     |
| 1399,311,O,314,H,311-O-314-H           | 1439,320,OD2,499,HZ3,320-OD2-499-HZ3   |
| 1400,312,O,316,H,312-O-316-H           | 1440,320,OD2,499,HZ2,320-OD2-499-HZ2   |
| 1401,312,O,516,H17,312-O-516-H17       | 1441,320,O,324,HG1,320-O-324-HG1       |
| 1402,313,O,317,H,313-O-317-H           | 1442,320,OD1,499,HZ3,320-OD1-499-HZ3   |
| 1403,313,OD1,134,HH22,313-OD1-134-HH22 | 1443,320,OD2,499,HZ1,320-OD2-499-HZ1   |
| 1404,313,OD1,134,HH21,313-OD1-134-HH21 | 1444,320,OD1,499,HZ2,320-OD1-499-HZ2   |
| 1405,313,O,316,H,313-O-316-H           | 1445,320,OD2,187,HH,320-OD2-187-HH     |
| 1406,313,OD2,134,HH12,313-OD2-134-HH12 | 1446,320,OD1,499,HZ1,320-OD1-499-HZ1   |
| 1407,313,OD1,134,HH12,313-OD1-134-HH12 | 1447,320,OD2,516,H10,320-OD2-516-H10   |
| 1408,313,OD1,116,HG,313-OD1-116-HG     | 1448,320,OD1,222,HD22,320-OD1-222-HD22 |
| 1409,313,OD1,309,HD22,313-OD1-309-HD22 | 1449,320,OD1,497,HG1,320-OD1-497-HG1   |
| 1410,313,OD1,120,HG,313-OD1-120-HG     | 1450,320,OD2,497,HG1,320-OD2-497-HG1   |
| 1411,313,OD1,121,H,313-OD1-121-H       | 1451,321,O,325,H,321-O-325-H           |
| 1412,313,OD2,120,HG,313-OD2-120-HG     | 1452,321,O,324,H,321-O-324-H           |
| 1413,313,OD2,309,HD21,313-OD2-309-HD21 | 1453,322,O,325,H,322-O-325-H           |
| 1414,313,OD2,116,HG,313-OD2-116-HG     | 1454,322,O,326,H,322-O-326-H           |
| 1415,313,OD1,122,H,313-OD1-122-H       | 1455,323,O,326,H,323-O-326-H           |
| 1416,313,OD2,309,HD22,313-OD2-309-HD22 | 1456,323,O,327,HG,323-O-327-HG         |
| 1417,313,OD1,309,HD21,313-OD1-309-HD21 | 1457,323,O,327,H,323-O-327-H           |
| 1418,313,OD2,122,H,313-OD2-122-H       | 1458,324,O,328,H,324-O-328-H           |
| 1419,313,OD2,121,H,313-OD2-121-H       | 1459,324,OG1,499,HZ2,324-OG1-499-HZ2   |
| 1420,313,OD2,134,HE,313-OD2-134-HE     | 1460,324,OG1,499,HZ3,324-OG1-499-HZ3   |
| 1421,313,OD1,134,HE,313-OD1-134-HE     | 1461,324,O,327,HG,324-O-327-HG         |
| 1422,313,OD2,134,HH22,313-OD2-134-HH22 | 1462,324,O,327,H,324-O-327-H           |
| 1423,313,OD2,134,HH21,313-OD2-134-HH21 | 1463,324,OG1,499,HZ1,324-OG1-499-HZ1   |
| 1424,314,O,318,H,314-O-318-H           | 1464,325,O,329,HG,325-O-329-HG         |
| 1425,314,O,317,H,314-O-317-H           | 1465,325,O,329,H,325-O-329-H           |
| 1426,315,O,319,H,315-O-319-H           | 1466,326,O,330,H,326-O-330-H           |
| 1427,315,O,318,H,315-O-318-H           | 1467,326,O,329,HG,326-O-329-HG         |
| 1428,315,O,317,H,315-O-317-H           | 1468,326,O,329,H,326-O-329-H           |
| 1429,316,O,516,H17,316-O-516-H17       | 1469,327,O,327,HG,327-O-327-HG         |
| 1430,317,O,321,HG1,317-O-321-HG1       | 1470,327,O,331,H,327-O-331-H           |
| 1431,317,O,319,H,317-O-319-H           | 1471,328,O,331,H,328-O-331-H           |
| 1432,318,O,321,H,318-O-321-H           | 1472,328,O,332,H,328-O-332-H           |
| 1433,318,O,322,H,318-O-322-H           | 1473,329,O,333,H,329-O-333-H           |
| 1434,318,O,321,HG1,318-O-321-HG1       | 1474,330,O,334,H,330-O-334-H           |
| 1435,319,O,323,H,319-O-323-H           | 1475,330,O,333,H,330-O-333-H           |
| 1436,319,O,323,HG1,319-O-323-HG1       | 1476,331,O,334,H,331-O-334-H           |

|                                        |                                        |
|----------------------------------------|----------------------------------------|
| 1477,331,O,335,H,331-O-335-H           | 1517,345,OE1,342,HZ1,345-OE1-342-HZ1   |
| 1478,332,O,336,HD22,332-O-336-HD22     | 1518,345,OE2,341,HH11,345-OE2-341-HH11 |
| 1479,332,O,335,H,332-O-335-H           | 1519,345,OE2,341,HE,345-OE2-341-HE     |
| 1480,332,O,336,H,332-O-336-H           | 1520,345,O,349,H,345-O-349-H           |
| 1481,333,O,336,H,333-O-336-H           | 1521,345,OE2,342,HZ3,345-OE2-342-HZ3   |
| 1482,333,O,340,HE21,333-O-340-HE21     | 1522,345,OE2,342,HZ1,345-OE2-342-HZ1   |
| 1483,335,O,336,HD22,335-O-336-HD22     | 1523,345,OE2,342,HZ2,345-OE2-342-HZ2   |
| 1484,336,OD1,339,H,336-OD1-339-H       | 1524,345,OE1,341,HH12,345-OE1-341-HH12 |
| 1485,336,OD1,338,HE,336-OD1-338-HE     | 1525,345,OE2,341,HH22,345-OE2-341-HH22 |
| 1486,336,O,339,H,336-O-339-H           | 1526,345,OE1,341,HH22,345-OE1-341-HH22 |
| 1487,336,OD1,338,H,336-OD1-338-H       | 1527,345,OE2,341,HH12,345-OE2-341-HH12 |
| 1488,336,O,340,H,336-O-340-H           | 1528,345,OE1,342,HZ3,345-OE1-342-HZ3   |
| 1489,337,O,341,H,337-O-341-H           | 1529,345,OE2,341,HH21,345-OE2-341-HH21 |
| 1490,337,O,340,H,337-O-340-H           | 1530,345,OE1,342,HZ2,345-OE1-342-HZ2   |
| 1491,338,O,338,HH11,338-O-338-HH11     | 1531,346,OE2,342,HZ3,346-OE2-342-HZ3   |
| 1492,338,O,342,H,338-O-342-H           | 1532,346,OE1,342,HZ3,346-OE1-342-HZ3   |
| 1493,339,O,343,H,339-O-343-H           | 1533,346,OE2,342,HZ1,346-OE2-342-HZ1   |
| 1494,339,O,342,H,339-O-342-H           | 1534,346,O,350,H,346-O-350-H           |
| 1495,340,O,344,H,340-O-344-H           | 1535,346,OE1,367,H,346-OE1-367-H       |
| 1496,340,OE1,344,HE22,340-OE1-344-HE22 | 1536,346,OE1,368,H,346-OE1-368-H       |
| 1497,340,OE1,480,H,340-OE1-480-H       | 1537,346,O,349,H,346-O-349-H           |
| 1498,340,O,343,H,340-O-343-H           | 1538,346,OE1,342,HZ1,346-OE1-342-HZ1   |
| 1499,341,O,345,H,341-O-345-H           | 1539,346,OE1,342,HZ2,346-OE1-342-HZ2   |
| 1500,341,O,341,HH11,341-O-341-HH11     | 1540,346,OE2,367,H,346-OE2-367-H       |
| 1501,342,O,345,H,342-O-345-H           | 1541,346,OE2,342,HZ2,346-OE2-342-HZ2   |
| 1502,342,O,346,H,342-O-346-H           | 1542,347,O,350,H,347-O-350-H           |
| 1503,342,O,342,HZ1,342-O-342-HZ1       | 1543,347,O,352,H,347-O-352-H           |
| 1504,343,O,346,H,343-O-346-H           | 1544,347,O,351,H,347-O-351-H           |
| 1505,343,O,347,H,343-O-347-H           | 1545,348,OD1,353,HE,348-OD1-353-HE     |
| 1506,344,O,511,HH12,344-O-511-HH12     | 1546,348,OD2,511,HH22,348-OD2-511-HH22 |
| 1507,344,OE1,341,HH11,344-OE1-341-HH11 | 1547,348,OD1,511,HH12,348-OD1-511-HH12 |
| 1508,344,OE1,341,HE,344-OE1-341-HE     | 1548,348,OD2,511,HH12,348-OD2-511-HH12 |
| 1509,344,O,348,H,344-O-348-H           | 1549,348,OD1,353,HH21,348-OD1-353-HH21 |
| 1510,344,O,511,HH22,344-O-511-HH22     | 1550,348,OD1,511,HH22,348-OD1-511-HH22 |
| 1511,344,OE1,341,HH21,344-OE1-341-HH21 | 1551,348,OD2,353,HE,348-OD2-353-HE     |
| 1512,345,OE2,338,HH12,345-OE2-338-HH12 | 1552,348,O,352,H,348-O-352-H           |
| 1513,345,OE1,338,HH22,345-OE1-338-HH22 | 1553,348,OD2,353,HH21,348-OD2-353-HH21 |
| 1514,345,OE2,338,HH22,345-OE2-338-HH22 | 1554,350,O,355,HH21,350-O-355-HH21     |
| 1515,345,OE1,338,HH12,345-OE1-338-HH12 | 1555,350,O,355,HH22,350-O-355-HH22     |
| 1516,345,O,349,HG1,345-O-349-HG1       | 1556,351,O,355,HH11,351-O-355-HH11     |

|                                        |                                        |
|----------------------------------------|----------------------------------------|
| 1557,351,O,355,HH21,351-O-355-HH21     | 1597,361,OD1,358,HH11,361-OD1-358-HH11 |
| 1558,351,O,354,HG,351-O-354-HG         | 1598,362,O,365,H,362-O-365-H           |
| 1559,351,O,355,HE,351-O-355-HE         | 1599,362,NH1,465,HE1,362-NH1-465-HE1   |
| 1560,352,O,355,H,352-O-355-H           | 1600,364,ND1,363,HG,364-ND1-363-HG     |
| 1561,352,O,476,HE21,352-O-476-HE21     | 1601,364,ND1,364,H,364-ND1-364-H       |
| 1562,352,O,354,H,352-O-354-H           | 1602,365,O,369,H,365-O-369-H           |
| 1563,353,O,477,HH21,353-O-477-HH21     | 1603,365,O,368,H,365-O-368-H           |
| 1564,353,O,477,HH22,353-O-477-HH22     | 1604,366,O,369,H,366-O-369-H           |
| 1565,353,O,476,HE21,353-O-476-HE21     | 1605,366,O,370,H,366-O-370-H           |
| 1566,353,O,477,HH12,353-O-477-HH12     | 1606,367,O,371,H,367-O-371-H           |
| 1567,354,OG,355,H,354-OG-355-H         | 1607,367,OH,342,HZ3,367-OH-342-HZ3     |
| 1568,355,O,476,HE22,355-O-476-HE22     | 1608,368,O,372,H,368-O-372-H           |
| 1569,355,O,476,HE21,355-O-476-HE21     | 1609,369,OE1,362,HH21,369-OE1-362-HH21 |
| 1570,356,O,355,HE,356-O-355-HE         | 1610,369,OE2,362,HE,369-OE2-362-HE     |
| 1571,356,O,355,HH11,356-O-355-HH11     | 1611,369,OE1,464,HH21,369-OE1-464-HH21 |
| 1572,356,O,355,HH21,356-O-355-HH21     | 1612,369,OE2,464,HH21,369-OE2-464-HH21 |
| 1573,357,O,356,HH11,357-O-356-HH11     | 1613,369,OE2,362,HH21,369-OE2-362-HH21 |
| 1574,358,NH2,360,HG,358-NH2-360-HG     | 1614,369,OE2,441,HZ2,369-OE2-441-HZ2   |
| 1575,358,O,361,H,358-O-361-H           | 1615,369,OE1,362,HH22,369-OE1-362-HH22 |
| 1576,359,O,362,HH11,359-O-362-HH11     | 1616,369,OE1,362,HH12,369-OE1-362-HH12 |
| 1577,359,O,362,H,359-O-362-H           | 1617,369,OE2,362,HH22,369-OE2-362-HH22 |
| 1578,360,OG,358,HE,360-OG-358-HE       | 1618,369,OE1,464,HE,369-OE1-464-HE     |
| 1579,360,O,363,HG,360-O-363-HG         | 1619,369,O,372,H,369-O-372-H           |
| 1580,360,O,360,HG,360-O-360-HG         | 1620,369,OE2,464,HE,369-OE2-464-HE     |
| 1581,360,O,363,H,360-O-363-H           | 1621,369,OE1,362,HE,369-OE1-362-HE     |
| 1582,361,OD2,358,HH21,361-OD2-358-HH21 | 1622,369,O,373,H,369-O-373-H           |
| 1583,361,OD1,360,HG,361-OD1-360-HG     | 1623,370,O,374,H,370-O-374-H           |
| 1584,361,OD1,364,HE2,361-OD1-364-HE2   | 1624,371,O,374,H,371-O-374-H           |
| 1585,361,OD2,355,HE,361-OD2-355-HE     | 1625,371,O,375,H,371-O-375-H           |
| 1586,361,OD1,355,HH12,361-OD1-355-HH12 | 1626,371,O,375,HG1,371-O-375-HG1       |
| 1587,361,OD1,358,HH21,361-OD1-358-HH21 | 1627,372,O,376,H,372-O-376-H           |
| 1588,361,OD2,355,HH22,361-OD2-355-HH22 | 1628,373,O,377,H,373-O-377-H           |
| 1589,361,O,364,H,361-O-364-H           | 1629,374,OE1,377,HE,374-OE1-377-HE     |
| 1590,361,OD2,358,HE,361-OD2-358-HE     | 1630,374,OE2,431,HH22,374-OE2-431-HH22 |
| 1591,361,O,365,H,361-O-365-H           | 1631,374,OE2,431,HH12,374-OE2-431-HH12 |
| 1592,361,OD2,358,H,361-OD2-358-H       | 1632,374,OE2,377,HE,374-OE2-377-HE     |
| 1593,361,OD1,355,HH22,361-OD1-355-HH22 | 1633,374,OE2,377,HH21,374-OE2-377-HH21 |
| 1594,361,OD2,355,HH12,361-OD2-355-HH12 | 1634,374,O,378,H,374-O-378-H           |
| 1595,361,OD1,358,HE,361-OD1-358-HE     | 1635,374,OE1,431,HH11,374-OE1-431-HH11 |
| 1596,361,OD2,355,HH21,361-OD2-355-HH21 | 1636,374,OE1,431,HH12,374-OE1-431-HH12 |

|                                        |                                      |
|----------------------------------------|--------------------------------------|
| 1637,374,OE1,431,HH22,374-OE1-431-HH22 | 1677,391,O,403,HZ2,391-O-403-HZ2     |
| 1638,374,OE1,377,HH21,374-OE1-377-HH21 | 1678,391,OG1,392,HE,391-OG1-392-HE   |
| 1639,374,OE2,431,HH11,374-OE2-431-HH11 | 1679,391,O,403,HZ1,391-O-403-HZ1     |
| 1640,374,OE2,428,H,374-OE2-428-H       | 1680,391,OG1,104,HZ2,391-OG1-104-HZ2 |
| 1641,375,O,379,HG,375-O-379-HG         | 1681,391,OG1,104,H,391-OG1-104-H     |
| 1642,375,O,379,H,375-O-379-H           | 1682,391,OG1,105,H,391-OG1-105-H     |
| 1643,375,OG1,329,HG,375-OG1-329-HG     | 1683,393,OD1,393,H,393-OD1-393-H     |
| 1644,376,O,380,H,376-O-380-H           | 1684,393,OD1,403,HZ1,393-OD1-403-HZ1 |
| 1645,377,O,416,HE2,377-O-416-HE2       | 1685,393,OD2,403,H,393-OD2-403-H     |
| 1646,377,O,380,HG,377-O-380-HG         | 1686,393,OD1,403,HZ3,393-OD1-403-HZ3 |
| 1647,378,ND1,332,HH,378-ND1-332-HH     | 1687,393,OD2,400,HH,393-OD2-400-HH   |
| 1648,378,O,416,HE2,378-O-416-HE2       | 1688,393,OD1,403,H,393-OD1-403-H     |
| 1649,379,OG,381,H,379-OG-381-H         | 1689,393,OD1,403,HZ2,393-OD1-403-HZ2 |
| 1650,379,O,412,HE1,379-O-412-HE1       | 1690,393,OD2,403,HZ1,393-OD2-403-HZ1 |
| 1651,380,O,382,H,380-O-382-H           | 1691,393,OD2,393,H,393-OD2-393-H     |
| 1652,380,OG,415,HD22,380-OG-415-HD22   | 1692,393,OD1,400,HH,393-OD1-400-HH   |
| 1653,380,OG,416,HE2,380-OG-416-HE2     | 1693,393,OD2,403,HZ3,393-OD2-403-HZ3 |
| 1654,381,O,498,H,381-O-498-H           | 1694,393,OD2,403,HZ2,393-OD2-403-HZ2 |
| 1655,382,O,411,HE21,382-O-411-HE21     | 1695,394,OG1,99,HE21,394-OG1-99-HE21 |
| 1656,383,O,411,H,383-O-411-H           | 1696,394,OG1,395,H,394-OG1-395-H     |
| 1657,383,O,412,H,383-O-412-H           | 1697,394,O,401,H,394-O-401-H         |
| 1658,384,O,411,HE21,384-O-411-HE21     | 1698,394,O,395,HG,394-O-395-HG       |
| 1659,385,O,385,HG1,385-O-385-HG1       | 1699,395,O,94,HE21,395-O-94-HE21     |
| 1660,385,O,230,HG,385-O-230-HG         | 1700,395,O,99,HE21,395-O-99-HE21     |
| 1661,385,OG1,409,H,385-OG1-409-H       | 1701,395,O,99,HE22,395-O-99-HE22     |
| 1662,386,O,388,HD1,386-O-388-HD1       | 1702,396,O,399,H,396-O-399-H         |
| 1663,386,O,106,HH12,386-O-106-HH12     | 1703,397,O,38,HZ3,397-O-38-HZ3       |
| 1664,386,O,385,HG1,386-O-385-HG1       | 1704,397,O,399,H,397-O-399-H         |
| 1665,387,O,106,HH11,387-O-106-HH11     | 1705,397,O,38,HZ1,397-O-38-HZ1       |
| 1666,388,O,389,HG,388-O-389-HG         | 1706,398,O,38,HZ1,398-O-38-HZ1       |
| 1667,388,O,407,H,388-O-407-H           | 1707,398,O,38,H,398-O-38-H           |
| 1668,388,NE2,385,HG1,388-NE2-385-HG1   | 1708,398,O,38,HZ2,398-O-38-HZ2       |
| 1669,389,O,105,H,389-O-105-H           | 1709,398,O,38,HZ3,398-O-38-HZ3       |
| 1670,390,OG1,405,H,390-OG1-405-H       | 1710,399,O,396,H,399-O-396-H         |
| 1671,390,OG1,404,H,390-OG1-404-H       | 1711,399,O,395,HG,399-O-395-HG       |
| 1672,390,O,404,H,390-O-404-H           | 1712,400,O,39,HD22,400-O-39-HD22     |
| 1673,390,O,403,HZ3,390-O-403-HZ3       | 1713,401,O,394,H,401-O-394-H         |
| 1674,391,O,403,HZ3,391-O-403-HZ3       | 1714,402,O,390,HG1,402-O-390-HG1     |
| 1675,391,OG1,104,HZ1,391-OG1-104-HZ1   | 1715,402,O,405,H,402-O-405-H         |
| 1676,391,OG1,104,HZ3,391-OG1-104-HZ3   | 1716,403,O,405,HH11,403-O-405-HH11   |

1717,404,O,405,HH11,404-O-405-HH11  
1718,405,O,390,H,405-O-390-H  
1719,405,O,389,HG,405-O-389-HG  
1720,405,O,390,HG1,405-O-390-HG1  
1721,405,NH2,75,HE22,405-NH2-75-HE22  
1722,406,O,84,H,406-O-84-H  
1723,407,O,388,H,407-O-388-H  
1724,408,O,86,H,408-O-86-H  
1725,409,O,411,H,409-O-411-H  
1726,409,O,385,H,409-O-385-H  
1727,410,OD1,412,H,410-OD1-412-H  
1728,410,OD1,413,H,410-OD1-413-H  
1729,410,O,413,H,410-O-413-H  
1730,410,O,414,H,410-O-414-H  
1731,411,O,415,HD22,411-O-415-HD22  
1732,411,OE1,451,H,411-OE1-451-H  
1733,411,O,415,H,411-O-415-H  
1734,411,O,414,H,411-O-414-H  
1735,412,O,415,H,412-O-415-H  
1736,412,O,416,H,412-O-416-H  
1737,413,OE1,68,HE21,413-OE1-68-HE21  
1738,413,OE1,410,HD22,413-OE1-410-HD22  
1739,413,NE2,68,HE22,413-NE2-68-HE22  
1740,413,OE1,64,HG,413-OE1-64-HG  
1741,413,O,417,H,413-O-417-H  
1742,413,O,413,HE21,413-O-413-HE21  
1743,413,O,416,H,413-O-416-H  
1744,413,NE2,87,HG,413-NE2-87-HG  
1745,413,OE1,68,HE22,413-OE1-68-HE22  
1746,413,OE1,87,HG,413-OE1-87-HG  
1747,413,OE1,67,HG,413-OE1-67-HG  
1748,414,O,421,HE1,414-O-421-HE1  
1749,414,O,417,H,414-O-417-H  
1750,415,OD1,448,H,415-OD1-448-H  
1751,415,O,377,HH11,415-O-377-HH11  
1752,416,ND1,377,HH12,416-ND1-377-HH12  
1753,416,O,418,HE21,416-O-418-HE21  
1754,417,OD2,419,H,417-OD2-419-H  
1755,417,O,419,H,417-O-419-H  
1756,417,OD1,419,HZ3,417-OD1-419-HZ3  
1757,417,OD2,419,HZ1,417-OD2-419-HZ1  
1758,417,OD1,418,HE21,417-OD1-418-HE21  
1759,417,OD2,419,HZ2,417-OD2-419-HZ2  
1760,417,OD2,420,H,417-OD2-420-H  
1761,417,OD1,419,H,417-OD1-419-H  
1762,417,OD2,419,HZ3,417-OD2-419-HZ3  
1763,417,OD1,419,HZ2,417-OD1-419-HZ2  
1764,417,O,420,H,417-O-420-H  
1765,417,OD2,68,HE22,417-OD2-68-HE22  
1766,417,O,421,H,417-O-421-H  
1767,417,OD2,413,HE22,417-OD2-413-HE22  
1768,417,OD1,419,HZ1,417-OD1-419-HZ1  
1769,417,OD1,68,HE22,417-OD1-68-HE22  
1770,417,OD1,420,H,417-OD1-420-H  
1771,417,OD1,413,HE21,417-OD1-413-HE21  
1772,417,OD2,413,HE21,417-OD2-413-HE21  
1773,418,OE1,68,HE22,418-OE1-68-HE22  
1774,418,OE1,418,H,418-OE1-418-H  
1775,418,OE1,68,HE21,418-OE1-68-HE21  
1776,418,OE1,423,H,418-OE1-423-H  
1777,418,NE2,418,H,418-NE2-418-H  
1778,418,O,418,HE21,418-O-418-HE21  
1779,420,O,446,HZ1,420-O-446-HZ1  
1780,420,O,446,HZ2,420-O-446-HZ2  
1781,420,O,446,HZ3,420-O-446-HZ3  
1782,422,O,431,HH21,422-O-431-HH21  
1783,422,O,431,HE,422-O-431-HE  
1784,423,OD1,425,HG,423-OD1-425-HG  
1785,423,O,426,H,423-O-426-H  
1786,423,OD1,425,H,423-OD1-425-H  
1787,423,O,431,HH21,423-O-431-HH21  
1788,423,O,423,HD22,423-O-423-HD22  
1789,423,O,431,HH22,423-O-431-HH22  
1790,423,N,423,HD22,423-N-423-HD22  
1791,423,OD1,426,H,423-OD1-426-H  
1792,424,O,377,HH22,424-O-377-HH22  
1793,424,O,377,HH12,424-O-377-HH12  
1794,425,O,425,HG,425-O-425-HG  
1795,425,O,378,HE2,425-O-378-HE2  
1796,426,OE2,423,HD22,426-OE2-423-HD22



|                                        |                                        |
|----------------------------------------|----------------------------------------|
| 1797,426,OE1,423,HD22,426-OE1-423-HD22 | 1837,438,O,434,HG1,438-O-434-HG1       |
| 1798,426,O,431,HH22,426-O-431-HH22     | 1838,438,O,434,H,438-O-434-H           |
| 1799,426,O,431,HH12,426-O-431-HH12     | 1839,439,O,441,HZ1,439-O-441-HZ1       |
| 1800,426,OE1,427,H,426-OE1-427-H       | 1840,439,O,441,HZ2,439-O-441-HZ2       |
| 1801,426,OE1,425,HG,426-OE1-425-HG     | 1841,439,O,441,H,439-O-441-H           |
| 1802,426,OE2,425,HG,426-OE2-425-HG     | 1842,439,O,441,HZ3,439-O-441-HZ3       |
| 1803,426,OE2,427,H,426-OE2-427-H       | 1843,440,OD2,443,H,440-OD2-443-H       |
| 1804,426,O,428,H,426-O-428-H           | 1844,440,O,444,HG,440-O-444-HG         |
| 1805,427,O,338,HH21,427-O-338-HH21     | 1845,440,OD1,442,H,440-OD1-442-H       |
| 1806,428,O,431,H,428-O-431-H           | 1846,440,OD1,443,H,440-OD1-443-H       |
| 1807,429,O,432,H,429-O-432-H           | 1847,440,O,443,H,440-O-443-H           |
| 1808,429,O,433,H,429-O-433-H           | 1848,440,OD2,441,H,440-OD2-441-H       |
| 1809,430,OE1,342,HZ3,430-OE1-342-HZ3   | 1849,440,O,444,H,440-O-444-H           |
| 1810,430,OE1,338,HH22,430-OE1-338-HH22 | 1850,440,O,442,H,440-O-442-H           |
| 1811,430,OE2,342,HZ3,430-OE2-342-HZ3   | 1851,440,OD2,442,H,440-OD2-442-H       |
| 1812,430,OE2,338,HH12,430-OE2-338-HH12 | 1852,441,O,444,HG,441-O-444-HG         |
| 1813,430,OE2,430,H,430-OE2-430-H       | 1853,441,O,445,H,441-O-445-H           |
| 1814,430,OE1,367,HH,430-OE1-367-HH     | 1854,442,O,446,HZ3,442-O-446-HZ3       |
| 1815,430,OE2,342,HZ1,430-OE2-342-HZ1   | 1855,442,O,446,H,442-O-446-H           |
| 1816,430,OE2,342,HZ2,430-OE2-342-HZ2   | 1856,442,O,445,H,442-O-445-H           |
| 1817,430,OE1,342,HZ2,430-OE1-342-HZ2   | 1857,442,O,446,HZ2,442-O-446-HZ2       |
| 1818,430,OE2,367,HH,430-OE2-367-HH     | 1858,442,O,446,HZ1,442-O-446-HZ1       |
| 1819,430,O,433,H,430-O-433-H           | 1859,443,O,447,H,443-O-447-H           |
| 1820,430,OE1,430,H,430-OE1-430-H       | 1860,443,O,446,H,443-O-446-H           |
| 1821,430,OE1,338,HH12,430-OE1-338-HH12 | 1861,444,OG,464,HH22,444-OG-464-HH22   |
| 1822,430,OE2,338,HH22,430-OE2-338-HH22 | 1862,444,O,464,HH22,444-O-464-HH22     |
| 1823,430,OE1,342,HZ1,430-OE1-342-HZ1   | 1863,444,O,447,H,444-O-447-H           |
| 1824,432,O,440,H,432-O-440-H           | 1864,444,OG,445,H,444-OG-445-H         |
| 1825,434,O,437,H,434-O-437-H           | 1865,445,OE1,464,HH12,445-OE1-464-HH12 |
| 1826,434,OG1,437,H,434-OG1-437-H       | 1866,445,OE2,441,HZ3,445-OE2-441-HZ3   |
| 1827,434,OG1,438,H,434-OG1-438-H       | 1867,445,OE1,446,HZ3,445-OE1-446-HZ3   |
| 1828,434,OG1,436,H,434-OG1-436-H       | 1868,445,OE2,93,HH21,445-OE2-93-HH21   |
| 1829,435,O,437,H,435-O-437-H           | 1869,445,OE1,444,HG,445-OE1-444-HG     |
| 1830,436,O,438,H,436-O-438-H           | 1870,445,OE1,456,HZ3,445-OE1-456-HZ3   |
| 1831,436,OD2,434,HG1,436-OD2-434-HG1   | 1871,445,OE2,93,HH22,445-OE2-93-HH22   |
| 1832,436,OD1,436,H,436-OD1-436-H       | 1872,445,OE1,441,HZ3,445-OE1-441-HZ3   |
| 1833,436,OD1,438,H,436-OD1-438-H       | 1873,445,OE1,93,HH12,445-OE1-93-HH12   |
| 1834,436,OD2,438,H,436-OD2-438-H       | 1874,445,OE1,464,HH22,445-OE1-464-HH22 |
| 1835,436,OD2,436,H,436-OD2-436-H       | 1875,445,OE2,464,HH12,445-OE2-464-HH12 |
| 1836,436,OD1,434,HG1,436-OD1-434-HG1   | 1876,445,OE1,441,HZ2,445-OE1-441-HZ2   |

|                                        |                                        |
|----------------------------------------|----------------------------------------|
| 1877,445,O,93,HH21,445-O-93-HH21       | 1917,459,O,463,H,459-O-463-H           |
| 1878,445,OE1,93,HH22,445-OE1-93-HH22   | 1918,459,O,462,H,459-O-462-H           |
| 1879,445,OE1,441,HZ1,445-OE1-441-HZ1   | 1919,459,O,464,H,459-O-464-H           |
| 1880,445,OE2,464,HH22,445-OE2-464-HH22 | 1920,460,OE1,456,HZ3,460-OE1-456-HZ3   |
| 1881,445,OE2,441,HZ2,445-OE2-441-HZ2   | 1921,460,OE2,461,HG1,460-OE2-461-HG1   |
| 1882,445,O,447,H,445-O-447-H           | 1922,460,OE2,456,HZ2,460-OE2-456-HZ2   |
| 1883,445,OE1,93,HH21,445-OE1-93-HH21   | 1923,460,OE2,464,HH22,460-OE2-464-HH22 |
| 1884,445,OE2,444,HG,445-OE2-444-HG     | 1924,460,O,464,HH11,460-O-464-HH11     |
| 1885,445,OE2,441,HZ1,445-OE2-441-HZ1   | 1925,460,O,464,H,460-O-464-H           |
| 1886,445,OE2,93,HH12,445-OE2-93-HH12   | 1926,460,OE1,461,H,460-OE1-461-H       |
| 1887,445,O,93,HH22,445-O-93-HH22       | 1927,460,OE2,464,HH11,460-OE2-464-HH11 |
| 1888,446,O,448,H,446-O-448-H           | 1928,460,OE2,464,HH12,460-OE2-464-HH12 |
| 1889,448,O,415,HD21,448-O-415-HD21     | 1929,460,OE2,461,H,460-OE2-461-H       |
| 1890,449,O,411,HE22,449-O-411-HE22     | 1930,460,OE1,464,HH11,460-OE1-464-HH11 |
| 1891,450,O,457,H,450-O-457-H           | 1931,460,OE2,139,HE22,460-OE2-139-HE22 |
| 1892,451,O,456,HZ1,451-O-456-HZ1       | 1932,460,OE1,456,HZ2,460-OE1-456-HZ2   |
| 1893,451,O,456,HZ3,451-O-456-HZ3       | 1933,460,OE1,456,HZ1,460-OE1-456-HZ1   |
| 1894,451,O,456,HZ2,451-O-456-HZ2       | 1934,460,OE1,461,HG1,460-OE1-461-HG1   |
| 1895,452,O,456,H,452-O-456-H           | 1935,460,OE2,456,HZ3,460-OE2-456-HZ3   |
| 1896,452,O,455,H,452-O-455-H           | 1936,460,OE2,456,HZ1,460-OE2-456-HZ1   |
| 1897,453,O,455,H,453-O-455-H           | 1937,461,O,464,H,461-O-464-H           |
| 1898,453,O,456,HZ2,453-O-456-HZ2       | 1938,461,O,465,H,461-O-465-H           |
| 1899,453,O,456,H,453-O-456-H           | 1939,461,O,461,HG1,461-O-461-HG1       |
| 1900,454,O,135,HH12,454-O-135-HH12     | 1940,461,OG1,139,HE22,461-OG1-139-HE22 |
| 1901,454,O,456,H,454-O-456-H           | 1941,461,OG1,139,HE21,461-OG1-139-HE21 |
| 1902,454,O,135,HH22,454-O-135-HH22     | 1942,462,O,466,H,462-O-466-H           |
| 1903,455,NH1,131,HE1,455-NH1-131-HE1   | 1943,462,O,465,H,462-O-465-H           |
| 1904,455,O,135,HH12,455-O-135-HH12     | 1944,463,O,467,H,463-O-467-H           |
| 1905,455,O,452,H,455-O-452-H           | 1945,464,O,362,HH11,464-O-362-HH11     |
| 1906,456,O,135,HH22,456-O-135-HH22     | 1946,464,O,468,H,464-O-468-H           |
| 1907,456,O,135,HH12,456-O-135-HH12     | 1947,464,O,362,HH21,464-O-362-HH21     |
| 1908,457,O,460,H,457-O-460-H           | 1948,464,O,362,HE,464-O-362-HE         |
| 1909,457,O,456,HZ2,457-O-456-HZ2       | 1949,465,O,468,H,465-O-468-H           |
| 1910,457,O,456,HZ1,457-O-456-HZ1       | 1950,465,O,469,H,465-O-469-H           |
| 1911,457,O,135,HH22,457-O-135-HH22     | 1951,465,NE1,362,HH12,465-NE1-362-HH12 |
| 1912,458,O,461,H,458-O-461-H           | 1952,466,O,469,H,466-O-469-H           |
| 1913,458,O,139,HE22,458-O-139-HE22     | 1953,466,O,470,H,466-O-470-H           |
| 1914,458,O,461,HG1,458-O-461-HG1       | 1954,467,O,471,H,467-O-471-H           |
| 1915,458,O,139,HE21,458-O-139-HE21     | 1955,468,O,472,H,468-O-472-H           |
| 1916,458,O,462,H,458-O-462-H           | 1956,469,O,473,H,469-O-473-H           |

|                                        |                                      |
|----------------------------------------|--------------------------------------|
| 1957,469,O,472,H,469-O-472-H           | 1997,481,O,507,H,481-O-507-H         |
| 1958,470,O,474,H,470-O-474-H           | 1998,481,OG,507,HE21,481-OG-507-HE21 |
| 1959,471,O,475,H,471-O-475-H           | 1999,482,O,485,H,482-O-485-H         |
| 1960,472,O,476,H,472-O-476-H           | 2000,483,O,486,H,483-O-486-H         |
| 1961,473,O,476,H,473-O-476-H           | 2001,483,O,485,H,483-O-485-H         |
| 1962,473,O,477,HE,473-O-477-HE         | 2002,484,O,486,H,484-O-486-H         |
| 1963,473,O,477,HH11,473-O-477-HH11     | 2003,485,O,487,HZ2,485-O-487-HZ2     |
| 1964,473,O,477,H,473-O-477-H           | 2004,485,O,487,HZ1,485-O-487-HZ1     |
| 1965,473,O,477,HH21,473-O-477-HH21     | 2005,485,O,487,H,485-O-487-H         |
| 1966,474,O,478,H,474-O-478-H           | 2006,485,O,487,HZ3,485-O-487-HZ3     |
| 1967,474,O,477,H,474-O-477-H           | 2007,486,O,488,H,486-O-488-H         |
| 1968,475,O,344,HE21,475-O-344-HE21     | 2008,486,O,505,HE2,486-O-505-HE2     |
| 1969,475,O,511,HH21,475-O-511-HH21     | 2009,487,O,489,H,487-O-489-H         |
| 1970,475,O,511,HE,475-O-511-HE         | 2010,487,O,505,HE2,487-O-505-HE2     |
| 1971,476,O,476,HE21,476-O-476-HE21     | 2011,488,O,487,HZ1,488-O-487-HZ1     |
| 1972,476,O,511,HH21,476-O-511-HH21     | 2012,488,O,487,HZ3,488-O-487-HZ3     |
| 1973,476,O,511,HE,476-O-511-HE         | 2013,489,OD2,491,HG1,489-OD2-491-HG1 |
| 1974,477,O,511,H,477-O-511-H           | 2014,489,O,491,H,489-O-491-H         |
| 1975,478,O,344,HE22,478-O-344-HE22     | 2015,489,OD2,490,H,489-OD2-490-H     |
| 1976,478,O,344,HE21,478-O-344-HE21     | 2016,489,O,501,H,489-O-501-H         |
| 1977,479,OE1,512,H,479-OE1-512-H       | 2017,489,OD2,487,HZ1,489-OD2-487-HZ1 |
| 1978,479,OE1,341,HH21,479-OE1-341-HH21 | 2018,489,O,500,HD1,489-O-500-HD1     |
| 1979,479,OE1,512,HG,479-OE1-512-HG     | 2019,489,OD1,487,HZ3,489-OD1-487-HZ3 |
| 1980,479,OE2,512,H,479-OE2-512-H       | 2020,489,OD2,487,HZ3,489-OD2-487-HZ3 |
| 1981,479,OE1,341,HE,479-OE1-341-HE     | 2021,489,OD1,491,HG1,489-OD1-491-HG1 |
| 1982,479,OE1,341,HH22,479-OE1-341-HH22 | 2022,489,OD1,487,HZ2,489-OD1-487-HZ2 |
| 1983,479,OE2,341,HE,479-OE2-341-HE     | 2023,489,OD1,491,H,489-OD1-491-H     |
| 1984,479,OE2,341,HH12,479-OE2-341-HH12 | 2024,489,OD2,491,H,489-OD2-491-H     |
| 1985,479,OE1,344,HE22,479-OE1-344-HE22 | 2025,490,O,501,H,490-O-501-H         |
| 1986,479,OE1,341,HH12,479-OE1-341-HH12 | 2026,491,O,501,H,491-O-501-H         |
| 1987,479,OE2,509,HE21,479-OE2-509-HE21 | 2027,492,O,57,HZ1,492-O-57-HZ1       |
| 1988,479,OE2,341,HH22,479-OE2-341-HH22 | 2028,492,O,57,HZ3,492-O-57-HZ3       |
| 1989,479,OE2,512,HG,479-OE2-512-HG     | 2029,492,O,58,HD21,492-O-58-HD21     |
| 1990,479,OE2,341,HH21,479-OE2-341-HH21 | 2030,492,O,60,HE2,492-O-60-HE2       |
| 1991,479,O,509,H,479-O-509-H           | 2031,492,O,57,HZ2,492-O-57-HZ2       |
| 1992,479,O,509,HE21,479-O-509-HE21     | 2032,493,O,499,H,493-O-499-H         |
| 1993,479,OE1,509,HE21,479-OE1-509-HE21 | 2033,494,OH,230,H,494-OH-230-H       |
| 1994,480,O,340,HE22,480-O-340-HE22     | 2034,497,O,499,HZ3,497-O-499-HZ3     |
| 1995,481,OG,509,HE22,481-OG-509-HE22   | 2035,497,OG1,499,HZ3,497-OG1-499-HZ3 |
| 1996,481,OG,482,H,481-OG-482-H         | 2036,497,O,497,HG1,497-O-497-HG1     |

|                                        |                                        |
|----------------------------------------|----------------------------------------|
| 2037,497,O,499,HZ2,497-O-499-HZ2       | 2077,508,O,509,HE21,508-O-509-HE21     |
| 2038,497,OG1,499,HZ2,497-OG1-499-HZ2   | 2078,509,OE1,175,HE22,509-OE1-175-HE22 |
| 2039,497,O,499,HZ1,497-O-499-HZ1       | 2079,509,O,511,H,509-O-511-H           |
| 2040,497,OG1,499,HZ1,497-OG1-499-HZ1   | 2080,509,OE1,481,HG,509-OE1-481-HG     |
| 2041,497,O,499,H,497-O-499-H           | 2081,509,O,479,H,509-O-479-H           |
| 2042,497,OG1,516,H10,497-OG1-516-H10   | 2082,509,OE1,510,H,509-OE1-510-H       |
| 2043,498,O,328,HE1,498-O-328-HE1       | 2083,510,O,509,HE21,510-O-509-HE21     |
| 2044,499,O,493,H,499-O-493-H           | 2084,511,NH1,353,HH21,511-NH1-353-HH21 |
| 2045,500,O,500,HD1,500-O-500-HD1       | 2085,511,O,353,HH12,511-O-353-HH12     |
| 2046,500,O,502,H,500-O-502-H           | 2086,511,O,512,HG,511-O-512-HG         |
| 2047,500,NE2,327,HG,500-NE2-327-HG     | 2087,512,O,512,HG,512-O-512-HG         |
| 2048,501,O,500,HD1,501-O-500-HD1       | 2088,512,O,353,HH11,512-O-353-HH11     |
| 2049,501,O,503,H,501-O-503-H           | 2089,512,OXT,511,HH11,512-OXT-511-HH11 |
| 2050,502,O,504,H,502-O-504-H           | 2090,512,OXT,353,HH11,512-OXT-353-HH11 |
| 2051,502,O,185,HD21,502-O-185-HD21     | 2091,512,O,353,HH12,512-O-353-HH12     |
| 2052,502,O,487,HZ3,502-O-487-HZ3       | 2092,512,OXT,512,HG,512-OXT-512-HG     |
| 2053,503,O,506,H,503-O-506-H           | 2093,512,OXT,353,HH22,512-OXT-353-HH22 |
| 2054,503,O,185,HD22,503-O-185-HD22     | 2094,512,OXT,353,HH12,512-OXT-353-HH12 |
| 2055,503,O,505,H,503-O-505-H           | 2095,512,O,353,HH22,512-O-353-HH22     |
| 2056,504,OE2,188,HE,504-OE2-188-HE     | 2096,512,OG,341,HH22,512-OG-341-HH22   |
| 2057,504,OE1,504,H,504-OE1-504-H       | 2097,515,O1D,455,HH11,515-O1D-455-HH11 |
| 2058,504,OE1,188,HH12,504-OE1-188-HH12 | 2098,515,O2A,386,H,515-O2A-386-H       |
| 2059,504,OE2,188,HH22,504-OE2-188-HH22 | 2099,515,O2D,135,HH12,515-O2D-135-HH12 |
| 2060,504,OE2,185,HD22,504-OE2-185-HD22 | 2100,515,O2D,106,HH21,515-O2D-106-HH21 |
| 2061,504,OE2,188,HH21,504-OE2-188-HH21 | 2101,515,O2D,135,HH22,515-O2D-135-HH22 |
| 2062,504,OE1,188,HE,504-OE1-188-HE     | 2102,515,O1D,106,HE,515-O1D-106-HE     |
| 2063,504,OE1,183,HE2,504-OE1-183-HE2   | 2103,515,O2D,456,H,515-O2D-456-H       |
| 2064,504,OE2,504,H,504-OE2-504-H       | 2104,515,O1D,131,HE1,515-O1D-131-HE1   |
| 2065,504,OE1,185,HD22,504-OE1-185-HD22 | 2105,515,O1D,122,HG,515-O1D-122-HG     |
| 2066,504,OE2,188,HH12,504-OE2-188-HH12 | 2106,515,O1A,106,HH12,515-O1A-106-HH12 |
| 2067,504,OE1,188,HH22,504-OE1-188-HH22 | 2107,515,O2D,131,HE1,515-O2D-131-HE1   |
| 2068,504,OE1,188,HH21,504-OE1-188-HH21 | 2108,515,O1D,135,HH11,515-O1D-135-HH11 |
| 2069,504,OE1,505,HE2,504-OE1-505-HE2   | 2109,515,O2A,106,HH12,515-O2A-106-HH12 |
| 2070,505,ND1,504,H,505-ND1-504-H       | 2110,515,O1A,386,H,515-O1A-386-H       |
| 2071,505,ND1,505,H,505-ND1-505-H       | 2111,515,O2A,106,HH22,515-O2A-106-HH22 |
| 2072,506,O,184,H,506-O-184-H           | 2112,515,O2D,455,HH11,515-O2D-455-HH11 |
| 2073,507,OE1,481,HG,507-OE1-481-HG     | 2113,515,O2D,122,HG,515-O2D-122-HG     |
| 2074,507,OE1,183,HE2,507-OE1-183-HE2   | 2114,515,O1A,122,HG,515-O1A-122-HG     |
| 2075,507,O,481,H,507-O-481-H           | 2115,515,O1D,106,HH21,515-O1D-106-HH21 |
| 2076,507,OE1,509,HE21,507-OE1-509-HE21 | 2116,515,O1A,106,HH22,515-O1A-106-HH22 |

2117,515,O2D,135,HH11,515-O2D-135-HH11  
2118,516,O15,116,H,516-O15-116-H  
2119,516,O18,122,HG,516-O18-122-HG  
2120,516,O15,222,HD22,516-O15-222-HD22  
2121,516,O18,120,HG,516-O18-120-HG

## Model IV

RES\_DONOR,ATOM\_DONOR,RES\_ACCEPTOR,ATOM\_ACCEPTOR,  
TAG

1,37,O,39,H,37-O-39-H  
2,38,O,39,HD22,38-O-39-HD22  
3,38,O,400,H,38-O-400-H  
4,39,OD1,75,HE22,39-OD1-75-HE22  
5,39,OD1,38,HZ2,39-OD1-38-HZ2  
6,39,ND2,39,H,39-ND2-39-H  
7,39,ND2,75,HE22,39-ND2-75-HE22  
8,39,OD1,405,HH21,39-OD1-405-HH21  
9,39,OD1,38,HZ1,39-OD1-38-HZ1  
10,39,O,39,HD22,39-O-39-HD22  
11,39,OD1,39,H,39-OD1-39-H  
12,39,O,38,HZ1,39-O-38-HZ1  
13,40,O,39,HD22,40-O-39-HD22  
14,40,O,75,HE21,40-O-75-HE21  
15,41,O,75,H,41-O-75-H  
16,43,O,77,HH22,43-O-77-HH22  
17,43,O,51,HE2,43-O-51-HE2  
18,44,O,51,HE2,44-O-51-HE2  
19,45,O,77,HH12,45-O-77-HH12  
20,45,O,77,HE,45-O-77-HE  
21,45,O,77,HH22,45-O-77-HH22  
22,45,O,77,HH21,45-O-77-HH21  
23,45,N,51,HE2,45-N-51-HE2  
24,46,O,77,HH21,46-O-77-HH21  
25,46,O,77,HH12,46-O-77-HH12  
26,46,O,48,H,46-O-48-H  
27,46,O,49,H,46-O-49-H  
28,46,O,77,HH22,46-O-77-HH22  
29,46,O,50,H,46-O-50-H  
30,47,O,77,HH11,47-O-77-HH11  
31,47,O,80,HG,47-O-80-HG  
32,47,O,77,HH12,47-O-77-HH12

33,47,O,77,HE,47-O-77-HE  
34,47,O,77,HH21,47-O-77-HH21  
35,47,O,77,HH22,47-O-77-HH22  
36,48,O,77,HH21,48-O-77-HH21  
37,49,O,52,H,49-O-52-H  
38,49,O,79,H,49-O-79-H  
39,50,O,53,H,50-O-53-H  
40,50,O,52,H,50-O-52-H  
41,50,O,46,H,50-O-46-H  
42,51,ND1,51,H,51-ND1-51-H  
43,51,ND1,77,H,51-ND1-77-H  
44,51,O,55,H,51-O-55-H  
45,51,O,54,HG1,51-O-54-HG1  
46,51,O,54,H,51-O-54-H  
47,52,O,54,H,52-O-54-H  
48,52,O,55,H,52-O-55-H  
49,52,O,56,H,52-O-56-H  
50,53,O,46,HE1,53-O-46-HE1  
51,53,O,56,H,53-O-56-H  
52,54,OG1,46,HE1,54-OG1-46-HE1  
53,54,O,54,HG1,54-O-54-HG1  
54,54,O,65,HH22,54-O-65-HH22  
55,54,OG1,65,HH22,54-OG1-65-HH22  
56,55,O,58,HD22,55-O-58-HD22  
57,55,O,58,H,55-O-58-H  
58,57,O,58,HD22,57-O-58-HD22  
59,57,O,57,HZ3,57-O-57-HZ3  
60,57,O,57,HZ2,57-O-57-HZ2  
61,57,O,57,HZ1,57-O-57-HZ1  
62,58,O,61,H,58-O-61-H  
63,58,O,62,H,58-O-62-H  
64,58,OD1,57,HZ1,58-OD1-57-HZ1  
65,58,O,58,HD22,58-O-58-HD22  
66,59,O,62,H,59-O-62-H  
67,59,O,63,H,59-O-63-H  
68,60,ND1,494,HH,60-ND1-494-HH  
69,60,O,64,HG,60-O-64-HG  
70,60,O,410,HD21,60-O-410-HD21  
71,60,O,64,H,60-O-64-H  
72,60,ND1,60,H,60-ND1-60-H

|                                     |                                     |
|-------------------------------------|-------------------------------------|
| 73,61,O,65,HE,61-O-65-HE            | 113,69,NE2,70,HH,69-NE2-70-HH       |
| 74,61,O,64,H,61-O-64-H              | 114,69,OE1,65,HH21,69-OE1-65-HH21   |
| 75,61,O,65,H,61-O-65-H              | 115,69,OE1,65,HH12,69-OE1-65-HH12   |
| 76,62,O,65,H,62-O-65-H              | 116,70,OH,69,HE21,70-OH-69-HE21     |
| 77,62,O,66,H,62-O-66-H              | 117,71,O,67,HG,71-O-67-HG           |
| 78,63,O,67,HG,63-O-67-HG            | 118,72,OD2,72,H,72-OD2-72-H         |
| 79,63,O,67,H,63-O-67-H              | 119,72,OD1,397,HZ3,72-OD1-397-HZ3   |
| 80,64,O,413,HE22,64-O-413-HE22      | 120,72,O,88,H,72-O-88-H             |
| 81,64,O,68,HE21,64-O-68-HE21        | 121,72,OD1,72,H,72-OD1-72-H         |
| 82,64,O,68,H,64-O-68-H              | 122,72,OD2,91,HG1,72-OD2-91-HG1     |
| 83,64,O,67,HG,64-O-67-HG            | 123,72,OD1,91,HG1,72-OD1-91-HG1     |
| 84,64,O,67,H,64-O-67-H              | 124,72,OD1,73,H,72-OD1-73-H         |
| 85,64,OG,410,HD21,64-OG-410-HD21    | 125,72,OD1,397,HZ2,72-OD1-397-HZ2   |
| 86,65,O,68,HE21,65-O-68-HE21        | 126,72,O,87,HG,72-O-87-HG           |
| 87,65,O,65,HH11,65-O-65-HH11        | 127,72,OD2,397,HZ2,72-OD2-397-HZ2   |
| 88,65,O,69,HE22,65-O-69-HE22        | 128,72,OD2,397,HZ1,72-OD2-397-HZ1   |
| 89,65,O,68,H,65-O-68-H              | 129,72,OD1,397,HZ1,72-OD1-397-HZ1   |
| 90,65,O,69,H,65-O-69-H              | 130,72,O,87,H,72-O-87-H             |
| 91,65,O,69,HE21,65-O-69-HE21        | 131,72,OD2,397,HZ3,72-OD2-397-HZ3   |
| 92,66,O,70,H,66-O-70-H              | 132,74,O,85,H,74-O-85-H             |
| 93,66,O,69,H,66-O-69-H              | 133,75,OE1,405,HH21,75-OE1-405-HH21 |
| 94,67,OG,87,HG,67-OG-87-HG          | 134,75,OE1,405,HE,75-OE1-405-HE     |
| 95,67,O,69,H,67-O-69-H              | 135,75,OE1,39,HD21,75-OE1-39-HD21   |
| 96,67,OG,413,HE21,67-OG-413-HE21    | 136,75,OE1,39,HD22,75-OE1-39-HD22   |
| 97,67,O,71,H,67-O-71-H              | 137,75,NE2,39,HD21,75-NE2-39-HD21   |
| 98,67,OG,68,HE21,67-OG-68-HE21      | 138,75,NE2,39,HD22,75-NE2-39-HD22   |
| 99,67,OG,413,HE22,67-OG-413-HE22    | 139,76,O,75,HE21,76-O-75-HE21       |
| 100,67,O,70,H,67-O-70-H             | 140,76,O,83,H,76-O-83-H             |
| 101,68,OE1,69,HE21,68-OE1-69-HE21   | 141,77,O,51,H,77-O-51-H             |
| 102,68,OE1,65,HH21,68-OE1-65-HH21   | 142,78,O,81,H,78-O-81-H             |
| 103,68,OE1,419,HZ2,68-OE1-419-HZ2   | 143,78,O,81,HG1,78-O-81-HG1         |
| 104,68,OE1,418,HE22,68-OE1-418-HE22 | 144,79,O,81,H,79-O-81-H             |
| 105,68,O,68,HE21,68-O-68-HE21       | 145,79,O,77,HE,79-O-77-HE           |
| 106,68,OE1,419,HZ3,68-OE1-419-HZ3   | 146,79,O,77,HH21,79-O-77-HH21       |
| 107,68,OE1,413,HE22,68-OE1-413-HE22 | 147,79,O,77,HH11,79-O-77-HH11       |
| 108,68,OE1,419,HZ1,68-OE1-419-HZ1   | 148,80,O,77,HE,80-O-77-HE           |
| 109,68,OE1,65,HH11,68-OE1-65-HH11   | 149,80,O,77,HH21,80-O-77-HH21       |
| 110,68,NE2,413,HE22,68-NE2-413-HE22 | 150,80,OG,77,HH21,80-OG-77-HH21     |
| 111,68,OE1,65,HE,68-OE1-65-HE       | 151,80,O,77,HH11,80-O-77-HH11       |
| 112,69,OE1,70,HH,69-OE1-70-HH       | 152,80,O,77,HH12,80-O-77-HH12       |

|                                   |                                   |
|-----------------------------------|-----------------------------------|
| 153,80,O,80,HG,80-O-80-HG         | 193,90,OD2,91,HG1,90-OD2-91-HG1   |
| 154,80,OG,241,HH12,80-OG-241-HH12 | 194,90,OD1,397,HZ2,90-OD1-397-HZ2 |
| 155,80,OG,81,HG1,80-OG-81-HG1     | 195,90,OD2,397,HZ2,90-OD2-397-HZ2 |
| 156,81,O,78,H,81-O-78-H           | 196,90,OD2,93,HH11,90-OD2-93-HH11 |
| 157,81,O,81,HG1,81-O-81-HG1       | 197,90,OD1,91,HG1,90-OD1-91-HG1   |
| 158,82,O,405,HH11,82-O-405-HH11   | 198,90,OD2,93,HH21,90-OD2-93-HH21 |
| 159,83,O,76,H,83-O-76-H           | 199,90,OD1,397,HZ3,90-OD1-397-HZ3 |
| 160,84,O,408,H,84-O-408-H         | 200,90,OD2,98,HH12,90-OD2-98-HH12 |
| 161,85,O,74,H,85-O-74-H           | 201,90,OD1,93,HH22,90-OD1-93-HH22 |
| 162,86,O,87,HG,86-O-87-HG         | 202,90,OD2,93,HH12,90-OD2-93-HH12 |
| 163,86,O,410,H,86-O-410-H         | 203,91,OG1,397,HZ1,91-OG1-397-HZ1 |
| 164,87,OG,410,HD22,87-OG-410-HD22 | 204,91,O,95,H,91-O-95-H           |
| 165,87,O,91,HG1,87-O-91-HG1       | 205,91,OG1,397,HZ2,91-OG1-397-HZ2 |
| 166,87,O,87,HG,87-O-87-HG         | 206,91,OG1,397,HZ3,91-OG1-397-HZ3 |
| 167,87,OG,67,HG,87-OG-67-HG       | 207,92,O,95,H,92-O-95-H           |
| 168,87,O,413,HE22,87-O-413-HE22   | 208,92,O,96,H,92-O-96-H           |
| 169,87,O,413,HE21,87-O-413-HE21   | 209,93,O,98,H,93-O-98-H           |
| 170,88,O,91,H,88-O-91-H           | 210,93,O,97,H,93-O-97-H           |
| 171,88,O,91,HG1,88-O-91-HG1       | 211,94,O,98,H,94-O-98-H           |
| 172,88,O,92,H,88-O-92-H           | 212,94,OE1,397,HZ2,94-OE1-397-HZ2 |
| 173,89,O,93,HE,89-O-93-HE         | 213,94,O,94,HE21,94-O-94-HE21     |
| 174,89,O,92,H,89-O-92-H           | 214,94,O,99,H,94-O-99-H           |
| 175,89,O,93,H,89-O-93-H           | 215,94,OE1,397,HZ3,94-OE1-397-HZ3 |
| 176,90,OD2,93,HE,90-OD2-93-HE     | 216,94,OE1,98,HH21,94-OE1-98-HH21 |
| 177,90,OD1,98,HH22,90-OD1-98-HH22 | 217,94,OE1,98,HH11,94-OE1-98-HH11 |
| 178,90,OD1,93,HH11,90-OD1-93-HH11 | 218,94,OE1,98,HE,94-OE1-98-HE     |
| 179,90,OD1,93,HE,90-OD1-93-HE     | 219,94,OE1,397,HZ1,94-OE1-397-HZ1 |
| 180,90,O,98,HH12,90-O-98-HH12     | 220,94,NE2,397,H,94-NE2-397-H     |
| 181,90,OD2,98,HH22,90-OD2-98-HH22 | 221,94,OE1,397,H,94-OE1-397-H     |
| 182,90,O,94,H,90-O-94-H           | 222,94,O,99,HE21,94-O-99-HE21     |
| 183,90,OD1,93,HH21,90-OD1-93-HH21 | 223,95,O,99,H,95-O-99-H           |
| 184,90,OD2,397,HZ1,90-OD2-397-HZ1 | 224,95,O,100,H,95-O-100-H         |
| 185,90,OD2,397,HZ3,90-OD2-397-HZ3 | 225,96,O,454,H,96-O-454-H         |
| 186,90,OD1,98,HH12,90-OD1-98-HH12 | 226,96,O,100,H,96-O-100-H         |
| 187,90,OD2,93,HH22,90-OD2-93-HH22 | 227,97,O,454,HZ2,97-O-454-HZ2     |
| 188,90,OD1,93,HH12,90-OD1-93-HH12 | 228,97,O,100,H,97-O-100-H         |
| 189,90,OD1,90,H,90-OD1-90-H       | 229,97,O,454,HZ1,97-O-454-HZ1     |
| 190,90,OD1,397,HZ1,90-OD1-397-HZ1 | 230,97,O,454,HZ3,97-O-454-HZ3     |
| 191,90,OD2,94,HE21,90-OD2-94-HE21 | 231,98,O,98,HH11,98-O-98-HH11     |
| 192,90,O,98,HH22,90-O-98-HH22     | 232,98,O,99,HE21,98-O-99-HE21     |

|                                       |                                       |
|---------------------------------------|---------------------------------------|
| 233,99,O,102,H,99-O-102-H             | 273,102,OD2,394,HG1,102-OD2-394-HG1   |
| 234,99,OE1,394,HG1,99-OE1-394-HG1     | 274,102,O,391,H,102-O-391-H           |
| 235,99,O,101,H,99-O-101-H             | 275,102,OD1,392,HH11,102-OD1-392-HH11 |
| 236,99,O,103,H,99-O-103-H             | 276,102,OD2,99,HE21,102-OD2-99-HE21   |
| 237,99,OE1,94,HE21,99-OE1-94-HE21     | 277,102,OD2,392,HH11,102-OD2-392-HH11 |
| 238,100,O,454,HZ1,100-O-454-HZ1       | 278,103,O,105,H,103-O-105-H           |
| 239,100,O,454,HZ3,100-O-454-HZ3       | 279,103,O,389,H,103-O-389-H           |
| 240,100,O,103,H,100-O-103-H           | 280,103,O,388,HD1,103-O-388-HD1       |
| 241,100,O,104,H,100-O-104-H           | 281,104,O,455,HH21,104-O-455-HH21     |
| 242,100,O,454,HZ2,100-O-454-HZ2       | 282,104,O,455,HE,104-O-455-HE         |
| 243,101,O,104,HZ2,101-O-104-HZ2       | 283,104,O,127,HG,104-O-127-HG         |
| 244,101,OD1,104,HZ3,101-OD1-104-HZ3   | 284,104,O,127,H,104-O-127-H           |
| 245,101,OD1,104,HZ2,101-OD1-104-HZ2   | 285,105,O,389,H,105-O-389-H           |
| 246,101,O,391,HG1,101-O-391-HG1       | 286,105,O,388,HD1,105-O-388-HD1       |
| 247,101,OD1,392,HH22,101-OD1-392-HH22 | 287,107,O,109,H,107-O-109-H           |
| 248,101,OD1,392,HH12,101-OD1-392-HH12 | 288,108,OD1,108,H,108-OD1-108-H       |
| 249,101,O,104,H,101-O-104-H           | 289,108,OD2,108,H,108-OD2-108-H       |
| 250,101,OD2,104,HZ3,101-OD2-104-HZ3   | 290,109,O,113,HG1,109-O-113-HG1       |
| 251,101,OD2,454,HZ2,101-OD2-454-HZ2   | 291,109,O,112,H,109-O-112-H           |
| 252,101,OD2,454,HZ1,101-OD2-454-HZ1   | 292,109,O,113,H,109-O-113-H           |
| 253,101,OD1,454,HZ1,101-OD1-454-HZ1   | 293,110,O,114,H,110-O-114-H           |
| 254,101,O,104,HZ1,101-O-104-HZ1       | 294,110,OH,252,HZ2,110-OH-252-HZ2     |
| 255,101,OD2,392,HH12,101-OD2-392-HH12 | 295,110,OH,252,HZ1,110-OH-252-HZ1     |
| 256,101,OD2,104,HZ2,101-OD2-104-HZ2   | 296,110,O,113,HG1,110-O-113-HG1       |
| 257,101,OD1,104,HZ1,101-OD1-104-HZ1   | 297,110,O,113,H,110-O-113-H           |
| 258,101,OD1,454,HZ2,101-OD1-454-HZ2   | 298,111,OG1,112,H,111-OG1-112-H       |
| 259,101,OD1,454,HZ3,101-OD1-454-HZ3   | 299,111,O,114,H,111-O-114-H           |
| 260,101,OD2,454,HZ3,101-OD2-454-HZ3   | 300,111,OG1,232,HD22,111-OG1-232-HD22 |
| 261,101,O,392,HH22,101-O-392-HH22     | 301,111,O,115,H,111-O-115-H           |
| 262,101,OD2,104,HZ1,101-OD2-104-HZ1   | 302,112,O,115,H,112-O-115-H           |
| 263,101,O,104,HZ3,101-O-104-HZ3       | 303,113,O,118,H,113-O-118-H           |
| 264,101,OD2,392,HH22,101-OD2-392-HH22 | 304,114,O,117,H,114-O-117-H           |
| 265,102,O,391,HG1,102-O-391-HG1       | 305,114,O,118,H,114-O-118-H           |
| 266,102,OD1,394,HG1,102-OD1-394-HG1   | 306,114,O,255,HD21,114-O-255-HD21     |
| 267,102,OD1,392,HH21,102-OD1-392-HH21 | 307,115,O,120,H,115-O-120-H           |
| 268,102,OD1,99,HE21,102-OD1-99-HE21   | 308,115,O,118,H,115-O-118-H           |
| 269,102,O,104,H,102-O-104-H           | 309,115,O,119,H,115-O-119-H           |
| 270,102,OD1,392,HE,102-OD1-392-HE     | 310,116,O,119,HE21,116-O-119-HE21     |
| 271,102,OD2,392,HE,102-OD2-392-HE     | 311,116,OG,309,HD22,116-OG-309-HD22   |
| 272,102,OD2,392,HH21,102-OD2-392-HH21 | 312,116,O,309,HD22,116-O-309-HD22     |



313,116,O,259,HH,116-O-259-HH  
314,116,O,119,H,116-O-119-H  
315,116,OG,259,HH,116-OG-259-HH  
316,116,OG,255,HD21,116-OG-255-HD21  
317,117,OD1,306,HZ2,117-OD1-306-HZ2  
318,117,O,119,H,117-O-119-H  
319,117,O,306,HZ3,117-O-306-HZ3  
320,117,OD1,263,HE22,117-OD1-263-HE22  
321,117,O,306,HZ1,117-O-306-HZ1  
322,117,OD1,259,HH,117-OD1-259-HH  
323,117,O,119,HE22,117-O-119-HE22  
324,117,O,306,HZ2,117-O-306-HZ2  
325,117,ND2,306,HZ2,117-ND2-306-HZ2  
326,117,O,117,HD22,117-O-117-HD22  
327,117,OD1,306,HZ1,117-OD1-306-HZ1  
328,117,OD1,306,HZ3,117-OD1-306-HZ3  
329,117,O,119,HE21,117-O-119-HE21  
330,117,OD1,119,HE21,117-OD1-119-HE21  
331,117,OD1,255,HD21,117-OD1-255-HD21  
332,117,OD1,309,HD22,117-OD1-309-HD22  
333,118,O,119,HE21,118-O-119-HE21  
334,118,O,120,H,118-O-120-H  
335,118,O,124,HG,118-O-124-HG  
336,119,NE2,309,HD21,119-NE2-309-HD21  
337,119,OE1,306,HZ1,119-OE1-306-HZ1  
338,119,OE1,309,HD21,119-OE1-309-HD21  
339,119,OE1,117,HD22,119-OE1-117-HD22  
340,119,OE1,259,HH,119-OE1-259-HH  
341,119,O,134,HH22,119-O-134-HH22  
342,119,OE1,309,HD22,119-OE1-309-HD22  
343,119,OE1,117,HD21,119-OE1-117-HD21  
344,119,O,309,HD21,119-O-309-HD21  
345,119,OE1,306,HZ3,119-OE1-306-HZ3  
346,119,OE1,134,HH12,119-OE1-134-HH12  
347,119,OE1,306,HZ2,119-OE1-306-HZ2  
348,119,O,119,HE21,119-O-119-HE21  
349,119,O,134,HH12,119-O-134-HH12  
350,119,OE1,134,HH22,119-OE1-134-HH22  
351,120,O,134,HH12,120-O-134-HH12  
352,120,OG,122,H,120-OG-122-H  
353,120,OG,123,H,120-OG-123-H  
354,120,O,124,HG,120-O-124-HG  
355,120,O,124,H,120-O-124-H  
356,120,O,123,H,120-O-123-H  
357,120,OG,122,HG,120-OG-122-HG  
358,121,O,131,HE1,121-O-131-HE1  
359,121,O,455,HH12,121-O-455-HH12  
360,121,O,124,H,121-O-124-H  
361,121,O,124,HG,121-O-124-HG  
362,121,O,455,HH22,121-O-455-HH22  
363,122,OG,516,H13,122-OG-516-H13  
364,122,O,455,HH12,122-O-455-HH12  
365,122,OG,123,H,122-OG-123-H  
366,122,O,106,HE,122-O-106-HE  
367,122,O,124,H,122-O-124-H  
368,124,OG,455,HH22,124-OG-455-HH22  
369,124,OG,126,H,124-OG-126-H  
370,124,O,455,HH22,124-O-455-HH22  
371,124,O,126,H,124-O-126-H  
372,124,OG,455,HH12,124-OG-455-HH12  
373,125,O,127,H,125-O-127-H  
374,125,O,106,H,125-O-106-H  
375,125,O,127,HG,125-O-127-HG  
376,126,O,127,HG,126-O-127-HG  
377,126,OD1,104,HZ3,126-OD1-104-HZ3  
378,126,OD1,134,HH12,126-OD1-134-HH12  
379,126,OD2,104,HZ1,126-OD2-104-HZ1  
380,126,OD2,104,HZ2,126-OD2-104-HZ2  
381,126,OD2,134,HH11,126-OD2-134-HH11  
382,126,OD2,128,H,126-OD2-128-H  
383,126,OD1,306,HZ3,126-OD1-306-HZ3  
384,126,OD1,306,HZ1,126-OD1-306-HZ1  
385,126,OD1,131,H,126-OD1-131-H  
386,126,OD1,128,H,126-OD1-128-H  
387,126,O,124,HG,126-O-124-HG  
388,126,O,455,HH22,126-O-455-HH22  
389,126,OD2,306,HZ2,126-OD2-306-HZ2  
390,126,OD2,104,HZ3,126-OD2-104-HZ3  
391,126,OD1,306,HZ2,126-OD1-306-HZ2  
392,126,OD1,104,HZ2,126-OD1-104-HZ2

393,126,OD2,134,HH22,126-OD2-134-HH22  
394,126,OD1,127,H,126-OD1-127-H  
395,126,OD2,126,H,126-OD2-126-H  
396,126,OD1,119,HE22,126-OD1-119-HE22  
397,126,OD2,119,HE22,126-OD2-119-HE22  
398,126,O,455,HH21,126-O-455-HH21  
399,126,OD2,124,HG,126-OD2-124-HG  
400,126,OD1,134,HH22,126-OD1-134-HH22  
401,126,OD1,124,HG,126-OD1-124-HG  
402,126,OD2,134,HH12,126-OD2-134-HH12  
403,126,OD2,127,H,126-OD2-127-H  
404,126,OD1,104,HZ1,126-OD1-104-HZ1  
405,126,O,128,H,126-O-128-H  
406,126,O,131,H,126-O-131-H  
407,127,O,104,HZ3,127-O-104-HZ3  
408,127,OG,455,HH21,127-OG-455-HH21  
409,127,O,127,HG,127-O-127-HG  
410,127,OG,455,HE,127-OG-455-HE  
411,127,O,104,HZ1,127-O-104-HZ1  
412,127,O,454,HZ3,127-O-454-HZ3  
413,127,O,104,HZ2,127-O-104-HZ2  
414,128,O,131,H,128-O-131-H  
415,128,O,132,H,128-O-132-H  
416,129,O,133,H,129-O-133-H  
417,129,O,297,HD22,129-O-297-HD22  
418,130,O,134,H,130-O-134-H  
419,130,O,133,H,130-O-133-H  
420,131,O,135,H,131-O-135-H  
421,132,O,136,H,132-O-136-H  
422,133,O,137,H,133-O-137-H  
423,133,O,136,H,133-O-136-H  
424,134,O,138,H,134-O-138-H  
425,134,O,137,H,134-O-137-H  
426,135,O,139,H,135-O-139-H  
427,135,O,139,HE21,135-O-139-HE21  
428,136,O,140,H,136-O-140-H  
429,136,O,140,HD22,136-O-140-HD22  
430,137,O,141,H,137-O-141-H  
431,137,O,140,H,137-O-140-H  
432,138,O,141,H,138-O-141-H

433,138,O,142,H,138-O-142-H  
434,139,OE1,143,HZ1,139-OE1-143-HZ1  
435,139,NE2,143,HZ1,139-NE2-143-HZ1  
436,139,O,139,HE21,139-O-139-HE21  
437,139,OE1,143,HZ2,139-OE1-143-HZ2  
438,139,OE1,140,HD22,139-OE1-140-HD22  
439,139,OE1,135,HE,139-OE1-135-HE  
440,139,OE1,136,HH21,139-OE1-136-HH21  
441,139,OE1,135,HH21,139-OE1-135-HH21  
442,139,OE1,461,HG1,139-OE1-461-HG1  
443,139,O,143,H,139-O-143-H  
444,139,OE1,143,HZ3,139-OE1-143-HZ3  
445,140,OD1,143,HZ1,140-OD1-143-HZ1  
446,140,OD1,136,HH11,140-OD1-136-HH11  
447,140,O,144,H,140-O-144-H  
448,140,OD1,136,HH22,140-OD1-136-HH22  
449,140,O,144,HG,140-O-144-HG  
450,140,OD1,136,HE,140-OD1-136-HE  
451,140,OD1,143,HZ2,140-OD1-143-HZ2  
452,140,O,143,H,140-O-143-H  
453,140,O,143,HZ2,140-O-143-HZ2  
454,140,OD1,143,HZ3,140-OD1-143-HZ3  
455,140,OD1,139,HE21,140-OD1-139-HE21  
456,141,O,145,H,141-O-145-H  
457,141,O,144,H,141-O-144-H  
458,142,O,145,H,142-O-145-H  
459,142,O,146,HG,142-O-146-HG  
460,142,O,147,H,142-O-147-H  
461,142,O,146,H,142-O-146-H  
462,143,O,148,H,143-O-148-H  
463,143,O,147,H,143-O-147-H  
464,143,O,146,H,143-O-146-H  
465,144,O,148,H,144-O-148-H  
466,144,OG,143,HZ2,144-OG-143-HZ2  
467,144,O,146,H,144-O-146-H  
468,145,O,162,HE2,145-O-162-HE2  
469,146,O,158,H,146-O-158-H  
470,146,O,159,H,146-O-159-H  
471,146,O,148,H,146-O-148-H  
472,146,OG,147,H,146-OG-147-H

473,147,O,143,HZ1,147-O-143-HZ1  
474,148,O,158,H,148-O-158-H  
475,149,O,158,HH,149-O-158-HH  
476,149,OG,150,H,149-OG-150-H  
477,149,O,149,HG,149-O-149-HG  
478,150,O,153,H,150-O-153-H  
479,150,OD1,155,HG1,150-OD1-155-HG1  
480,150,O,153,HG,150-O-153-HG  
481,150,O,152,H,150-O-152-H  
482,150,O,154,HG,150-O-154-HG  
483,150,O,149,HG,150-O-149-HG  
484,150,O,154,H,150-O-154-H  
485,150,OD1,155,H,150-OD1-155-H  
486,150,OD2,153,HG,150-OD2-153-HG  
487,150,OD1,153,HG,150-OD1-153-HG  
488,150,OD1,152,H,150-OD1-152-H  
489,150,OD2,156,HG,150-OD2-156-HG  
490,150,OD2,152,H,150-OD2-152-H  
491,150,OD2,158,HH,150-OD2-158-HH  
492,150,OD1,153,H,150-OD1-153-H  
493,150,OD1,277,HE2,150-OD1-277-HE2  
494,150,OD2,277,HE2,150-OD2-277-HE2  
495,150,OD1,158,HH,150-OD1-158-HH  
496,150,OD2,153,H,150-OD2-153-H  
497,150,OD1,279,HH11,150-OD1-279-HH11  
498,151,O,153,H,151-O-153-H  
499,151,O,154,HG,151-O-154-HG  
500,152,O,153,HG,152-O-153-HG  
501,152,O,154,H,152-O-154-H  
502,152,O,154,HG,152-O-154-HG  
503,153,O,156,HG,153-O-156-HG  
504,153,OG,155,H,153-OG-155-H  
505,153,OG,155,HG1,153-OG-155-HG1  
506,153,O,156,H,153-O-156-H  
507,153,O,154,HG,153-O-154-HG  
508,153,O,155,HG1,153-O-155-HG1  
509,153,OG,156,H,153-OG-156-H  
510,153,OG,154,H,153-OG-154-H  
511,153,O,155,H,153-O-155-H  
512,153,O,153,HG,153-O-153-HG  
513,153,OG,156,HG,153-OG-156-HG  
514,154,O,149,HG,154-O-149-HG  
515,154,O,154,HG,154-O-154-HG  
516,154,O,156,H,154-O-156-H  
517,154,O,155,HG1,154-O-155-HG1  
518,154,OG,155,HG1,154-OG-155-HG1  
519,154,O,358,HH12,154-O-358-HH12  
520,154,OG,155,H,154-OG-155-H  
521,154,O,358,HH22,154-O-358-HH22  
522,155,OG1,156,H,155-OG1-156-H  
523,155,O,358,HH22,155-O-358-HH22  
524,155,O,149,HG,155-O-149-HG  
525,155,O,155,HG1,155-O-155-HG1  
526,155,OG1,358,HH21,155-OG1-358-HH21  
527,155,O,356,HH21,155-O-356-HH21  
528,155,OG1,358,HH22,155-OG1-358-HH22  
529,155,O,358,HH12,155-O-358-HH12  
530,155,OG1,156,HG,155-OG1-156-HG  
531,155,O,358,HH21,155-O-358-HH21  
532,155,OG1,358,HH12,155-OG1-358-HH12  
533,155,OG1,153,HG,155-OG1-153-HG  
534,155,O,358,HE,155-O-358-HE  
535,155,O,156,HG,155-O-156-HG  
536,156,OG,358,HH21,156-OG-358-HH21  
537,156,OG,155,HG1,156-OG-155-HG1  
538,156,OG,356,HH21,156-OG-356-HH21  
539,156,OG,153,HG,156-OG-153-HG  
540,156,O,150,H,156-O-150-H  
541,156,O,153,HG,156-O-153-HG  
542,156,OG,358,HH22,156-OG-358-HH22  
543,156,O,149,HG,156-O-149-HG  
544,156,OG,358,HH12,156-OG-358-HH12  
545,156,OG,356,HH22,156-OG-356-HH22  
546,157,O,160,H,157-O-160-H  
547,157,O,156,HG,157-O-156-HG  
548,157,O,161,H,157-O-161-H  
549,158,O,161,H,158-O-161-H  
550,158,OH,277,HE2,158-OH-277-HE2  
551,158,O,162,H,158-O-162-H  
552,159,O,163,H,159-O-163-H

|                                       |                                       |
|---------------------------------------|---------------------------------------|
| 553,159,O,162,H,159-O-162-H           | 593,162,O,165,H,162-O-165-H           |
| 554,160,OE1,157,H,160-OE1-157-H       | 594,162,ND1,165,HZ1,162-ND1-165-HZ1   |
| 555,160,OE2,358,HH21,160-OE2-358-HH21 | 595,163,O,167,H,163-O-167-H           |
| 556,160,O,164,HG,160-O-164-HG         | 596,163,O,166,H,163-O-166-H           |
| 557,160,O,164,H,160-O-164-H           | 597,164,OG,356,HE,164-OG-356-HE       |
| 558,160,OE2,156,HG,160-OE2-156-HG     | 598,164,OG,356,HH11,164-OG-356-HH11   |
| 559,160,OE2,356,HE,160-OE2-356-HE     | 599,164,O,168,H,164-O-168-H           |
| 560,160,OE2,358,HE,160-OE2-358-HE     | 600,164,OG,356,HH21,164-OG-356-HH21   |
| 561,160,OE1,156,HG,160-OE1-156-HG     | 601,165,O,168,H,165-O-168-H           |
| 562,160,OE2,358,HH11,160-OE2-358-HH11 | 602,165,O,169,H,165-O-169-H           |
| 563,160,OE2,359,H,160-OE2-359-H       | 603,166,OE1,206,HE,166-OE1-206-HE     |
| 564,160,O,356,HH21,160-O-356-HH21     | 604,166,OE2,196,HD22,166-OE2-196-HD22 |
| 565,160,OE2,356,HH21,160-OE2-356-HH21 | 605,166,OE1,209,HE2,166-OE1-209-HE2   |
| 566,160,OE1,356,HH21,160-OE1-356-HH21 | 606,166,O,170,H,166-O-170-H           |
| 567,160,OE2,157,H,160-OE2-157-H       | 607,166,OE1,206,HH21,166-OE1-206-HH21 |
| 568,160,OE1,356,HE,160-OE1-356-HE     | 608,166,OE1,196,HD22,166-OE1-196-HD22 |
| 569,160,OE1,358,HH11,160-OE1-358-HH11 | 609,166,O,193,HG,166-O-193-HG         |
| 570,160,OE1,359,H,160-OE1-359-H       | 610,166,OE2,206,HH21,166-OE2-206-HH21 |
| 571,160,OE1,358,HH21,160-OE1-358-HH21 | 611,166,O,169,H,166-O-169-H           |
| 572,160,OE1,358,HE,160-OE1-358-HE     | 612,166,OE2,206,HE,166-OE2-206-HE     |
| 573,161,OE1,356,HH12,161-OE1-356-HH12 | 613,166,OE1,193,HG,166-OE1-193-HG     |
| 574,161,OE2,356,HH12,161-OE2-356-HH12 | 614,167,O,171,H,167-O-171-H           |
| 575,161,OE1,165,HZ1,161-OE1-165-HZ1   | 615,167,O,170,H,167-O-170-H           |
| 576,161,OE2,356,HH22,161-OE2-356-HH22 | 616,168,OE2,356,HH21,168-OE2-356-HH21 |
| 577,161,OE1,153,HG,161-OE1-153-HG     | 617,168,OE2,477,HH22,168-OE2-477-HH22 |
| 578,161,OE1,156,HG,161-OE1-156-HG     | 618,168,OE1,356,HH21,168-OE1-356-HH21 |
| 579,161,OE1,356,HH22,161-OE1-356-HH22 | 619,168,OE2,356,HH11,168-OE2-356-HH11 |
| 580,161,O,165,HZ3,161-O-165-HZ3       | 620,168,OE1,477,HH12,168-OE1-477-HH12 |
| 581,161,OE2,153,HG,161-OE2-153-HG     | 621,168,OE2,356,HH12,168-OE2-356-HH12 |
| 582,161,O,165,H,161-O-165-H           | 622,168,O,172,HG,168-O-172-HG         |
| 583,161,OE2,156,HG,161-OE2-156-HG     | 623,168,OE2,356,HE,168-OE2-356-HE     |
| 584,161,O,165,HZ1,161-O-165-HZ1       | 624,168,OE2,477,HH12,168-OE2-477-HH12 |
| 585,161,OE1,165,HZ2,161-OE1-165-HZ2   | 625,168,OE1,477,HH22,168-OE1-477-HH22 |
| 586,161,OE2,165,HZ3,161-OE2-165-HZ3   | 626,168,O,172,H,168-O-172-H           |
| 587,161,OE1,165,HZ3,161-OE1-165-HZ3   | 627,169,O,172,HG,169-O-172-HG         |
| 588,161,OE2,165,HZ1,161-OE2-165-HZ1   | 628,169,O,173,HG1,169-O-173-HG1       |
| 589,161,O,165,HZ2,161-O-165-HZ2       | 629,169,O,173,H,169-O-173-H           |
| 590,162,ND1,165,HZ3,162-ND1-165-HZ3   | 630,170,O,174,H,170-O-174-H           |
| 591,162,O,166,H,162-O-166-H           | 631,170,O,173,H,170-O-173-H           |
| 592,162,ND1,165,HZ2,162-ND1-165-HZ2   | 632,171,O,175,H,171-O-175-H           |

633,171,O,174,H,171-O-174-H  
634,171,O,175,HE21,171-O-175-HE21  
635,172,O,176,H,172-O-176-H  
636,172,O,175,HE21,172-O-175-HE21  
637,173,O,177,H,173-O-177-H  
638,173,O,176,H,173-O-176-H  
639,174,O,178,H,174-O-178-H  
640,174,O,177,H,174-O-177-H  
641,175,O,178,H,175-O-178-H  
642,175,O,179,H,175-O-179-H  
643,175,O,175,HE21,175-O-175-HE21  
644,176,OE1,175,HE21,176-OE1-175-HE21  
645,176,O,180,H,176-O-180-H  
646,176,O,179,H,176-O-179-H  
647,177,O,180,H,177-O-180-H  
648,177,O,182,H,177-O-182-H  
649,178,O,180,H,178-O-180-H  
650,181,O,507,HE22,181-O-507-HE22  
651,181,O,183,H,181-O-183-H  
652,182,O,507,HE21,182-O-507-HE21  
653,182,O,508,H,182-O-508-H  
654,183,ND1,507,HE21,183-ND1-507-HE21  
655,184,O,506,H,184-O-506-H  
656,185,O,188,H,185-O-188-H  
657,185,OD1,188,H,185-OD1-188-H  
658,185,ND2,188,HH12,185-ND2-188-HH12  
659,185,OD1,187,H,185-OD1-187-H  
660,186,O,190,H,186-O-190-H  
661,186,O,189,H,186-O-189-H  
662,186,O,327,HG,186-O-327-HG  
663,187,OH,222,HD21,187-OH-222-HD21  
664,187,O,190,H,187-O-190-H  
665,187,OH,188,HH21,187-OH-188-HH21  
666,187,OH,499,HZ1,187-OH-499-HZ1  
667,187,O,189,H,187-O-189-H  
668,187,O,191,H,187-O-191-H  
669,187,OH,499,HZ2,187-OH-499-HZ2  
670,187,OH,499,HZ3,187-OH-499-HZ3  
671,188,O,219,HD21,188-O-219-HD21  
672,188,O,192,H,188-O-192-H  
673,188,NH2,185,HD22,188-NH2-185-HD22  
674,189,OH,188,HE,189-OH-188-HE  
675,189,O,193,H,189-O-193-H  
676,189,O,193,HG,189-O-193-HG  
677,189,OH,188,HH21,189-OH-188-HH21  
678,189,O,192,H,189-O-192-H  
679,190,O,193,H,190-O-193-H  
680,190,O,194,H,190-O-194-H  
681,190,O,193,HG,190-O-193-HG  
682,191,O,195,HG1,191-O-195-HG1  
683,191,O,195,H,191-O-195-H  
684,192,O,196,H,192-O-196-H  
685,192,O,209,HE2,192-O-209-HE2  
686,192,O,196,HD22,192-O-196-HD22  
687,193,O,196,H,193-O-196-H  
688,193,O,197,H,193-O-197-H  
689,193,OG,209,HE2,193-OG-209-HE2  
690,194,O,197,H,194-O-197-H  
691,194,O,198,H,194-O-198-H  
692,195,O,199,H,195-O-199-H  
693,196,O,200,H,196-O-200-H  
694,196,OD1,207,H,196-OD1-207-H  
695,197,O,201,H,197-O-201-H  
696,197,O,200,H,197-O-200-H  
697,198,O,202,H,198-O-202-H  
698,198,O,201,H,198-O-201-H  
699,199,O,205,H,199-O-205-H  
700,199,O,202,H,199-O-202-H  
701,199,O,203,H,199-O-203-H  
702,199,O,204,H,199-O-204-H  
703,200,O,279,HH21,200-O-279-HH21  
704,200,O,204,H,200-O-204-H  
705,201,O,281,H,201-O-281-H  
706,202,O,282,H,202-O-282-H  
707,202,O,282,HG1,202-O-282-HG1  
708,203,O,269,HE2,203-O-269-HE2  
709,203,O,205,HE,203-O-205-HE  
710,203,O,205,HH21,203-O-205-HH21  
711,203,O,205,HH11,203-O-205-HH11  
712,203,O,205,H,203-O-205-H

|                                       |                                       |
|---------------------------------------|---------------------------------------|
| 713,204,O,279,HE,204-O-279-HE         | 753,211,O,214,H,211-O-214-H           |
| 714,204,O,279,HH21,204-O-279-HH21     | 754,211,ND1,207,HH,211-ND1-207-HH     |
| 715,204,O,279,HH22,204-O-279-HH22     | 755,212,O,216,H,212-O-216-H           |
| 716,204,O,205,HE,204-O-205-HE         | 756,212,OE1,216,HG,212-OE1-216-HG     |
| 717,204,O,279,HH12,204-O-279-HH12     | 757,212,OE1,212,H,212-OE1-212-H       |
| 718,204,O,205,HH21,204-O-205-HH21     | 758,212,NE2,212,H,212-NE2-212-H       |
| 719,206,O,205,HH21,206-O-205-HH21     | 759,212,O,216,HG,212-O-216-HG         |
| 720,206,O,205,HE,206-O-205-HE         | 760,212,O,212,HE21,212-O-212-HE21     |
| 721,206,O,205,HH11,206-O-205-HH11     | 761,213,OE1,264,HZ3,213-OE1-264-HZ3   |
| 722,207,OH,264,HZ2,207-OH-264-HZ2     | 762,213,O,216,HG,213-O-216-HG         |
| 723,207,OH,205,HH11,207-OH-205-HH11   | 763,213,OE2,211,HE2,213-OE2-211-HE2   |
| 724,207,O,206,HH22,207-O-206-HH22     | 764,213,OE1,212,HE22,213-OE1-212-HE22 |
| 725,207,OH,205,HH12,207-OH-205-HH12   | 765,213,OE1,257,HZ3,213-OE1-257-HZ3   |
| 726,207,O,196,HD21,207-O-196-HD21     | 766,213,OE2,216,HG,213-OE2-216-HG     |
| 727,207,OH,205,HE,207-OH-205-HE       | 767,213,OE2,207,HH,213-OE2-207-HH     |
| 728,207,OH,205,HH21,207-OH-205-HH21   | 768,213,OE2,264,HZ2,213-OE2-264-HZ2   |
| 729,208,OD2,206,HH22,208-OD2-206-HH22 | 769,213,OE1,260,HG,213-OE1-260-HG     |
| 730,208,OD2,206,HH12,208-OD2-206-HH12 | 770,213,O,217,H,213-O-217-H           |
| 731,208,OD1,209,H,208-OD1-209-H       | 771,213,OE1,212,HE21,213-OE1-212-HE21 |
| 732,208,OD1,210,HD21,208-OD1-210-HD21 | 772,213,O,216,H,213-O-216-H           |
| 733,208,OD1,210,H,208-OD1-210-H       | 773,213,OE2,257,HZ2,213-OE2-257-HZ2   |
| 734,208,OD1,206,HH12,208-OD1-206-HH12 | 774,213,OE1,257,HZ1,213-OE1-257-HZ1   |
| 735,208,OD2,210,HD21,208-OD2-210-HD21 | 775,213,OE2,264,HZ1,213-OE2-264-HZ1   |
| 736,208,OD1,210,HD22,208-OD1-210-HD22 | 776,213,OE1,264,HZ1,213-OE1-264-HZ1   |
| 737,208,OD2,209,H,208-OD2-209-H       | 777,213,O,257,HZ2,213-O-257-HZ2       |
| 738,208,O,210,H,208-O-210-H           | 778,213,OE1,264,HZ2,213-OE1-264-HZ2   |
| 739,208,OD2,210,HD22,208-OD2-210-HD22 | 779,213,OE2,257,HZ1,213-OE2-257-HZ1   |
| 740,208,OD2,208,H,208-OD2-208-H       | 780,213,OE2,257,HZ3,213-OE2-257-HZ3   |
| 741,208,O,211,H,208-O-211-H           | 781,213,OE2,212,HE22,213-OE2-212-HE22 |
| 742,208,OD2,210,H,208-OD2-210-H       | 782,213,OE1,207,HH,213-OE1-207-HH     |
| 743,209,ND1,206,HH22,209-ND1-206-HH22 | 783,213,O,257,HZ3,213-O-257-HZ3       |
| 744,209,O,210,HD22,209-O-210-HD22     | 784,213,O,257,HZ1,213-O-257-HZ1       |
| 745,209,ND1,209,H,209-ND1-209-H       | 785,213,OE1,257,HZ2,213-OE1-257-HZ2   |
| 746,209,ND1,196,HD22,209-ND1-196-HD22 | 786,213,OE2,212,HE21,213-OE2-212-HE21 |
| 747,209,ND1,173,HG1,209-ND1-173-HG1   | 787,213,OE1,211,HE2,213-OE1-211-HE2   |
| 748,210,O,212,HE21,210-O-212-HE21     | 788,213,OE2,264,HZ3,213-OE2-264-HZ3   |
| 749,210,OD1,210,H,210-OD1-210-H       | 789,214,O,218,H,214-O-218-H           |
| 750,210,O,210,HD22,210-O-210-HD22     | 790,214,O,217,H,214-O-217-H           |
| 751,211,O,215,H,211-O-215-H           | 791,215,O,219,H,215-O-219-H           |
| 752,211,ND1,213,H,211-ND1-213-H       | 792,215,O,218,H,215-O-218-H           |

|                                       |                                       |
|---------------------------------------|---------------------------------------|
| 793,215,O,220,H,215-O-220-H           | 833,221,O,223,H,221-O-223-H           |
| 794,215,O,219,HD22,215-O-219-HD22     | 834,221,O,221,HD22,221-O-221-HD22     |
| 795,216,OG,257,HZ3,216-OG-257-HZ3     | 835,221,OD1,223,HD21,221-OD1-223-HD21 |
| 796,216,O,257,HZ2,216-O-257-HZ2       | 836,221,OD1,187,HH,221-OD1-187-HH     |
| 797,216,OG,257,HZ1,216-OG-257-HZ1     | 837,221,OD1,221,H,221-OD1-221-H       |
| 798,216,O,257,HZ1,216-O-257-HZ1       | 838,221,OD1,188,HE,221-OD1-188-HE     |
| 799,216,OG,212,HE21,216-OG-212-HE21   | 839,221,OD1,188,HH21,221-OD1-188-HH21 |
| 800,216,O,220,H,216-O-220-H           | 840,222,OD1,499,HZ1,222-OD1-499-HZ1   |
| 801,216,O,219,H,216-O-219-H           | 841,222,OD1,224,H,222-OD1-224-H       |
| 802,216,OG,257,HZ2,216-OG-257-HZ2     | 842,222,OD1,187,HH,222-OD1-187-HH     |
| 803,216,O,257,HZ3,216-O-257-HZ3       | 843,222,OD1,499,HZ2,222-OD1-499-HZ2   |
| 804,216,O,219,HD22,216-O-219-HD22     | 844,222,OD1,499,HZ3,222-OD1-499-HZ3   |
| 805,217,O,221,H,217-O-221-H           | 845,222,ND2,499,HZ2,222-ND2-499-HZ2   |
| 806,217,O,220,H,217-O-220-H           | 846,222,O,226,H,222-O-226-H           |
| 807,217,O,222,HD21,217-O-222-HD21     | 847,222,O,499,HZ1,222-O-499-HZ1       |
| 808,217,O,219,H,217-O-219-H           | 848,222,ND2,499,HZ3,222-ND2-499-HZ3   |
| 809,218,O,220,H,218-O-220-H           | 849,222,O,499,HZ3,222-O-499-HZ3       |
| 810,218,O,187,HH,218-O-187-HH         | 850,222,O,499,HZ2,222-O-499-HZ2       |
| 811,218,O,221,H,218-O-221-H           | 851,222,OD1,223,H,222-OD1-223-H       |
| 812,218,O,188,HH12,218-O-188-HH12     | 852,222,ND2,499,HZ1,222-ND2-499-HZ1   |
| 813,218,O,222,HD21,218-O-222-HD21     | 853,222,O,225,H,222-O-225-H           |
| 814,218,O,221,HD22,218-O-221-HD22     | 854,223,O,226,H,223-O-226-H           |
| 815,219,OD1,221,HD21,219-OD1-221-HD21 | 855,223,O,227,H,223-O-227-H           |
| 816,219,O,257,HZ2,219-O-257-HZ2       | 856,223,O,247,HG,223-O-247-HG         |
| 817,219,OD1,257,HZ3,219-OD1-257-HZ3   | 857,223,OD1,257,HZ2,223-OD1-257-HZ2   |
| 818,219,O,223,HD22,219-O-223-HD22     | 858,223,OD1,221,HD22,223-OD1-221-HD22 |
| 819,219,OD1,188,HH12,219-OD1-188-HH12 | 859,223,O,223,HD22,223-O-223-HD22     |
| 820,219,OD1,188,HH22,219-OD1-188-HH22 | 860,223,OD1,223,H,223-OD1-223-H       |
| 821,219,O,223,HD21,219-O-223-HD21     | 861,224,O,228,H,224-O-228-H           |
| 822,219,O,221,H,219-O-221-H           | 862,224,O,227,H,224-O-227-H           |
| 823,219,OD1,257,HZ2,219-OD1-257-HZ2   | 863,225,O,496,H,225-O-496-H           |
| 824,219,OD1,188,HH21,219-OD1-188-HH21 | 864,225,O,229,H,225-O-229-H           |
| 825,219,O,221,HD22,219-O-221-HD22     | 865,226,OE1,223,HD22,226-OE1-223-HD22 |
| 826,219,O,219,HD22,219-O-219-HD22     | 866,226,OE2,226,H,226-OE2-226-H       |
| 827,219,OD1,257,HZ1,219-OD1-257-HZ1   | 867,226,OE2,223,HD21,226-OE2-223-HD21 |
| 828,220,O,223,H,220-O-223-H           | 868,226,OE1,57,HZ1,226-OE1-57-HZ1     |
| 829,220,O,257,HZ1,220-O-257-HZ1       | 869,226,O,229,H,226-O-229-H           |
| 830,220,O,223,HD22,220-O-223-HD22     | 870,226,O,57,HZ2,226-O-57-HZ2         |
| 831,220,O,222,H,220-O-222-H           | 871,226,OE1,223,HD21,226-OE1-223-HD21 |
| 832,221,O,223,HD22,221-O-223-HD22     | 872,226,OE2,223,HD22,226-OE2-223-HD22 |

|                                       |                                       |
|---------------------------------------|---------------------------------------|
| 873,226,O,232,HD22,226-O-232-HD22     | 913,235,O,241,HH11,235-O-241-HH11     |
| 874,226,OE2,57,HZ2,226-OE2-57-HZ2     | 914,235,OD1,232,HD22,235-OD1-232-HD22 |
| 875,226,OE1,57,HZ3,226-OE1-57-HZ3     | 915,235,OD1,110,H,235-OD1-110-H       |
| 876,226,OE2,57,HZ3,226-OE2-57-HZ3     | 916,235,OD1,241,HH11,235-OD1-241-HH11 |
| 877,226,OE1,226,H,226-OE1-226-H       | 917,235,OD2,232,HD22,235-OD2-232-HD22 |
| 878,226,OE2,247,HG,226-OE2-247-HG     | 918,236,O,81,HG1,236-O-81-HG1         |
| 879,226,OE1,57,HZ2,226-OE1-57-HZ2     | 919,236,O,80,H,236-O-80-H             |
| 880,226,OE1,247,HG,226-OE1-247-HG     | 920,236,O,80,HG,236-O-80-HG           |
| 881,227,O,229,H,227-O-229-H           | 921,236,O,241,HH12,236-O-241-HH12     |
| 882,227,O,232,HD22,227-O-232-HD22     | 922,236,O,241,HH11,236-O-241-HH11     |
| 883,228,O,230,H,228-O-230-H           | 923,237,O,240,H,237-O-240-H           |
| 884,228,O,231,H,228-O-231-H           | 924,237,O,241,H,237-O-241-H           |
| 885,229,O,494,HH,229-O-494-HH         | 925,238,O,241,H,238-O-241-H           |
| 886,229,O,231,H,229-O-231-H           | 926,238,O,242,H,238-O-242-H           |
| 887,229,O,232,H,229-O-232-H           | 927,239,O,243,H,239-O-243-H           |
| 888,229,O,230,HG,229-O-230-HG         | 928,239,O,242,H,239-O-242-H           |
| 889,230,O,494,HH,230-O-494-HH         | 929,240,O,245,HD22,240-O-245-HD22     |
| 890,230,O,230,HG,230-O-230-HG         | 930,240,O,245,HD21,240-O-245-HD21     |
| 891,230,OG,494,HH,230-OG-494-HH       | 931,240,O,243,H,240-O-243-H           |
| 892,230,O,232,H,230-O-232-H           | 932,242,OH,241,HH21,242-OH-241-HH21   |
| 893,232,OD1,235,H,232-OD1-235-H       | 933,243,O,245,HD22,243-O-245-HD22     |
| 894,232,O,236,H,232-O-236-H           | 934,243,O,245,H,243-O-245-H           |
| 895,232,OD1,234,H,232-OD1-234-H       | 935,244,O,245,HD22,244-O-245-HD22     |
| 896,232,OD1,245,HD21,232-OD1-245-HD21 | 936,244,O,249,HD21,244-O-249-HD21     |
| 897,232,O,235,H,232-O-235-H           | 937,245,O,248,H,245-O-248-H           |
| 898,232,OD1,247,HG,232-OD1-247-HG     | 938,245,OD1,247,HG,245-OD1-247-HG     |
| 899,233,O,237,H,233-O-237-H           | 939,245,O,249,H,245-O-249-H           |
| 900,233,O,236,H,233-O-236-H           | 940,245,O,249,HD22,245-O-249-HD22     |
| 901,234,O,237,H,234-O-237-H           | 941,245,OD1,247,H,245-OD1-247-H       |
| 902,234,O,241,HH11,234-O-241-HH11     | 942,245,OD1,248,H,245-OD1-248-H       |
| 903,234,O,241,HH12,234-O-241-HH12     | 943,246,O,250,H,246-O-250-H           |
| 904,235,OD2,232,H,235-OD2-232-H       | 944,246,O,249,H,246-O-249-H           |
| 905,235,OD1,111,H,235-OD1-111-H       | 945,246,O,249,HD22,246-O-249-HD22     |
| 906,235,OD2,111,HG1,235-OD2-111-HG1   | 946,247,O,250,H,247-O-250-H           |
| 907,235,O,241,HH12,235-O-241-HH12     | 947,247,O,251,H,247-O-251-H           |
| 908,235,OD2,241,HH11,235-OD2-241-HH11 | 948,247,OG,245,HD21,247-OG-245-HD21   |
| 909,235,OD2,111,H,235-OD2-111-H       | 949,247,O,223,HD21,247-O-223-HD21     |
| 910,235,OD1,241,HH22,235-OD1-241-HH22 | 950,247,OG,223,HD21,247-OG-223-HD21   |
| 911,235,OD1,241,HH12,235-OD1-241-HH12 | 951,247,OG,245,HD22,247-OG-245-HD22   |
| 912,235,OD1,111,HG1,235-OD1-111-HG1   | 952,247,OG,223,HD22,247-OG-223-HD22   |



953,247,OG,232,HD21,247-OG-232-HD21  
954,248,O,252,HZ2,248-O-252-HZ2  
955,248,O,252,H,248-O-252-H  
956,248,O,251,H,248-O-251-H  
957,249,O,252,H,249-O-252-H  
958,249,O,252,HZ1,249-O-252-HZ1  
959,249,OD1,252,HZ2,249-OD1-252-HZ2  
960,249,OD1,252,HZ3,249-OD1-252-HZ3  
961,249,O,252,HZ3,249-O-252-HZ3  
962,249,O,249,HD22,249-O-249-HD22  
963,249,OD1,245,H,249-OD1-245-H  
964,249,OD1,252,HZ1,249-OD1-252-HZ1  
965,249,O,253,H,249-O-253-H  
966,249,O,252,HZ2,249-O-252-HZ2  
967,250,O,254,H,250-O-254-H  
968,250,O,253,H,250-O-253-H  
969,250,O,223,HD21,250-O-223-HD21  
970,251,O,255,HD22,251-O-255-HD22  
971,251,O,254,H,251-O-254-H  
972,251,O,255,H,251-O-255-H  
973,252,O,255,H,252-O-255-H  
974,252,O,256,H,252-O-256-H  
975,253,OD1,249,HD21,253-OD1-249-HD21  
976,253,OD2,252,HZ2,253-OD2-252-HZ2  
977,253,OD2,249,HD21,253-OD2-249-HD21  
978,253,OD1,257,HZ1,253-OD1-257-HZ1  
979,253,OD1,257,HZ3,253-OD1-257-HZ3  
980,253,OD1,252,HZ1,253-OD1-252-HZ1  
981,253,OD2,257,HZ2,253-OD2-257-HZ2  
982,253,OD2,252,HZ1,253-OD2-252-HZ1  
983,253,O,257,H,253-O-257-H  
984,253,O,257,HZ3,253-O-257-HZ3  
985,253,OD2,257,HZ3,253-OD2-257-HZ3  
986,253,O,256,H,253-O-256-H  
987,253,OD2,257,HZ1,253-OD2-257-HZ1  
988,253,OD1,252,HZ3,253-OD1-252-HZ3  
989,253,OD1,252,HZ2,253-OD1-252-HZ2  
990,253,OD1,221,HD22,253-OD1-221-HD22  
991,253,OD2,252,HZ3,253-OD2-252-HZ3  
992,253,OD1,257,HZ2,253-OD1-257-HZ2

993,254,O,257,H,254-O-257-H  
994,254,O,258,H,254-O-258-H  
995,254,O,256,H,254-O-256-H  
996,255,O,255,HD22,255-O-255-HD22  
997,255,O,117,HD21,255-O-117-HD21  
998,255,OD1,116,H,255-OD1-116-H  
999,255,OD1,252,HZ1,255-OD1-252-HZ1  
1000,255,OD1,117,H,255-OD1-117-H  
1001,255,O,259,H,255-O-259-H  
1002,256,OE1,117,HD21,256-OE1-117-HD21  
1003,256,OE2,257,HZ3,256-OE2-257-HZ3  
1004,256,OE1,252,HZ2,256-OE1-252-HZ2  
1005,256,OE1,252,HZ1,256-OE1-252-HZ1  
1006,256,O,260,HG,256-O-260-HG  
1007,256,OE2,117,HD21,256-OE2-117-HD21  
1008,256,OE2,260,HG,256-OE2-260-HG  
1009,256,OE1,257,HZ3,256-OE1-257-HZ3  
1010,256,OE1,252,HZ3,256-OE1-252-HZ3  
1011,256,OE1,260,HG,256-OE1-260-HG  
1012,256,O,260,H,256-O-260-H  
1013,256,OE2,255,HD22,256-OE2-255-HD22  
1014,256,OE2,252,HZ2,256-OE2-252-HZ2  
1015,256,OE2,257,HZ1,256-OE2-257-HZ1  
1016,256,OE2,252,HZ1,256-OE2-252-HZ1  
1017,256,OE1,257,HZ2,256-OE1-257-HZ2  
1018,256,OE1,257,HZ1,256-OE1-257-HZ1  
1019,256,OE2,252,HZ3,256-OE2-252-HZ3  
1020,256,O,259,H,256-O-259-H  
1021,257,O,260,HG,257-O-260-HG  
1022,257,O,261,H,257-O-261-H  
1023,258,O,262,H,258-O-262-H  
1024,258,O,261,H,258-O-261-H  
1025,259,OH,306,HZ2,259-OH-306-HZ2  
1026,259,OH,306,HZ3,259-OH-306-HZ3  
1027,259,O,262,H,259-O-262-H  
1028,259,OH,119,HE22,259-OH-119-HE22  
1029,259,OH,263,HE21,259-OH-263-HE21  
1030,259,O,263,HE21,259-O-263-HE21  
1031,259,OH,309,HD22,259-OH-309-HD22  
1032,259,O,263,H,259-O-263-H

|                                        |                                        |
|----------------------------------------|----------------------------------------|
| 1033,260,OG,264,HZ3,260-OG-264-HZ3     | 1073,268,OE2,271,HZ2,268-OE2-271-HZ2   |
| 1034,260,O,264,HZ2,260-O-264-HZ2       | 1074,268,OE2,264,HZ2,268-OE2-264-HZ2   |
| 1035,260,OG,264,HZ1,260-OG-264-HZ1     | 1075,268,OE2,264,HZ3,268-OE2-264-HZ3   |
| 1036,260,O,264,HZ1,260-O-264-HZ1       | 1076,268,OE1,205,HH21,268-OE1-205-HH21 |
| 1037,260,OG,257,HZ1,260-OG-257-HZ1     | 1077,268,OE2,271,HZ3,268-OE2-271-HZ3   |
| 1038,260,O,264,H,260-O-264-H           | 1078,268,OE2,264,HZ1,268-OE2-264-HZ1   |
| 1039,260,O,264,HZ3,260-O-264-HZ3       | 1079,268,O,271,H,268-O-271-H           |
| 1040,260,OG,264,HZ2,260-OG-264-HZ2     | 1080,268,OE2,267,HZ3,268-OE2-267-HZ3   |
| 1041,261,O,264,H,261-O-264-H           | 1081,268,OE2,267,HZ2,268-OE2-267-HZ2   |
| 1042,261,O,265,H,261-O-265-H           | 1082,268,OE2,205,HH22,268-OE2-205-HH22 |
| 1043,262,O,266,H,262-O-266-H           | 1083,268,OE1,267,HZ1,268-OE1-267-HZ1   |
| 1044,262,O,265,H,262-O-265-H           | 1084,268,OE1,205,HH22,268-OE1-205-HH22 |
| 1045,263,OE1,267,HZ2,263-OE1-267-HZ2   | 1085,268,O,272,HG1,268-O-272-HG1       |
| 1046,263,O,267,H,263-O-267-H           | 1086,268,OE2,205,HH21,268-OE2-205-HH21 |
| 1047,263,O,267,HZ2,263-O-267-HZ2       | 1087,268,OE1,271,HZ3,268-OE1-271-HZ3   |
| 1048,263,OE1,267,HZ3,263-OE1-267-HZ3   | 1088,268,O,272,H,268-O-272-H           |
| 1049,263,OE1,267,HZ1,263-OE1-267-HZ1   | 1089,268,OE1,271,HZ1,268-OE1-271-HZ1   |
| 1050,263,O,267,HZ1,263-O-267-HZ1       | 1090,268,OE1,264,HZ1,268-OE1-264-HZ1   |
| 1051,263,O,263,HE21,263-O-263-HE21     | 1091,268,OE2,205,HE,268-OE2-205-HE     |
| 1052,263,OE1,259,HH,263-OE1-259-HH     | 1092,268,OE1,271,HZ2,268-OE1-271-HZ2   |
| 1053,263,O,267,HZ3,263-O-267-HZ3       | 1093,268,OE2,267,HZ1,268-OE2-267-HZ1   |
| 1054,263,OE1,117,HD21,263-OE1-117-HD21 | 1094,268,OE1,267,HZ2,268-OE1-267-HZ2   |
| 1055,264,O,267,H,264-O-267-H           | 1095,268,OE2,205,HH12,268-OE2-205-HH12 |
| 1056,264,O,267,HZ2,264-O-267-HZ2       | 1096,268,OE1,205,HH12,268-OE1-205-HH12 |
| 1057,264,O,268,H,264-O-268-H           | 1097,268,OE2,271,HZ1,268-OE2-271-HZ1   |
| 1058,264,O,267,HZ1,264-O-267-HZ1       | 1098,268,OE1,267,HZ3,268-OE1-267-HZ3   |
| 1059,265,O,269,H,265-O-269-H           | 1099,269,O,272,H,269-O-272-H           |
| 1060,265,O,205,HH12,265-O-205-HH12     | 1100,269,O,279,HH22,269-O-279-HH22     |
| 1061,265,O,268,H,265-O-268-H           | 1101,269,ND1,272,HG1,269-ND1-272-HG1   |
| 1062,265,O,205,HH22,265-O-205-HH22     | 1102,269,ND1,205,HH22,269-ND1-205-HH22 |
| 1063,266,O,269,H,266-O-269-H           | 1103,269,ND1,205,HH12,269-ND1-205-HH12 |
| 1064,266,O,270,H,266-O-270-H           | 1104,269,NE2,275,HZ3,269-NE2-275-HZ3   |
| 1065,267,O,270,H,267-O-270-H           | 1105,269,O,271,H,269-O-271-H           |
| 1066,267,O,271,HZ3,267-O-271-HZ3       | 1106,269,O,272,HG1,269-O-272-HG1       |
| 1067,267,O,271,H,267-O-271-H           | 1107,269,O,275,HZ2,269-O-275-HZ2       |
| 1068,267,O,271,HZ2,267-O-271-HZ2       | 1108,269,O,279,HH12,269-O-279-HH12     |
| 1069,267,O,271,HZ1,267-O-271-HZ1       | 1109,269,ND1,205,HH21,269-ND1-205-HH21 |
| 1070,268,OE1,264,HZ3,268-OE1-264-HZ3   | 1110,269,O,273,H,269-O-273-H           |
| 1071,268,OE1,264,HZ2,268-OE1-264-HZ2   | 1111,269,O,275,HZ3,269-O-275-HZ3       |
| 1072,268,OE1,205,HE,268-OE1-205-HE     | 1112,269,O,275,HZ1,269-O-275-HZ1       |

|                                        |                                        |
|----------------------------------------|----------------------------------------|
| 1113,270,O,275,HZ2,270-O-275-HZ2       | 1153,274,O,277,H,274-O-277-H           |
| 1114,270,O,273,H,270-O-273-H           | 1154,274,OE1,279,HH21,274-OE1-279-HH21 |
| 1115,270,O,275,HZ3,270-O-275-HZ3       | 1155,274,OE2,279,HH12,274-OE2-279-HH12 |
| 1116,270,O,275,HZ1,270-O-275-HZ1       | 1156,274,OE1,273,H,274-OE1-273-H       |
| 1117,270,OH,290,HE21,270-OH-290-HE21   | 1157,276,O,275,HZ1,276-O-275-HZ1       |
| 1118,270,O,272,H,270-O-272-H           | 1158,276,O,275,HZ3,276-O-275-HZ3       |
| 1119,270,OH,290,HE22,270-OH-290-HE22   | 1159,276,O,275,HZ2,276-O-275-HZ2       |
| 1120,271,O,273,H,271-O-273-H           | 1160,276,O,278,H,276-O-278-H           |
| 1121,271,O,272,HG1,271-O-272-HG1       | 1161,277,ND1,278,H,277-ND1-278-H       |
| 1122,272,OG1,279,HH11,272-OG1-279-HH11 | 1162,277,O,279,HH11,277-O-279-HH11     |
| 1123,272,O,279,HH22,272-O-279-HH22     | 1163,277,ND1,277,H,277-ND1-277-H       |
| 1124,272,OG1,205,HH21,272-OG1-205-HH21 | 1164,277,O,275,HZ2,277-O-275-HZ2       |
| 1125,272,OG1,279,HH12,272-OG1-279-HH12 | 1165,277,ND1,279,HH21,277-ND1-279-HH21 |
| 1126,272,OG1,205,HH22,272-OG1-205-HH22 | 1166,277,O,279,HH21,277-O-279-HH21     |
| 1127,272,OG1,205,HH12,272-OG1-205-HH12 | 1167,277,O,279,HE,277-O-279-HE         |
| 1128,272,O,275,HZ2,272-O-275-HZ2       | 1168,278,O,158,HH,278-O-158-HH         |
| 1129,272,OG1,279,HH22,272-OG1-279-HH22 | 1169,279,O,279,HE,279-O-279-HE         |
| 1130,272,O,275,HZ3,272-O-275-HZ3       | 1170,280,OD1,282,HG1,280-OD1-282-HG1   |
| 1131,272,O,272,HG1,272-O-272-HG1       | 1171,280,OD2,205,HH12,280-OD2-205-HH12 |
| 1132,272,O,279,HH12,272-O-279-HH12     | 1172,280,O,284,HG,280-O-284-HG         |
| 1133,272,O,275,HZ1,272-O-275-HZ1       | 1173,280,OD2,269,HE2,280-OD2-269-HE2   |
| 1134,273,O,275,H,273-O-275-H           | 1174,280,O,284,H,280-O-284-H           |
| 1135,273,O,275,HZ2,273-O-275-HZ2       | 1175,280,OD1,282,H,280-OD1-282-H       |
| 1136,273,O,275,HZ3,273-O-275-HZ3       | 1176,280,OD2,279,HE,280-OD2-279-HE     |
| 1137,274,O,276,H,274-O-276-H           | 1177,280,OD2,279,HH11,280-OD2-279-HH11 |
| 1138,274,OE2,274,H,274-OE2-274-H       | 1178,280,OD1,269,HE2,280-OD1-269-HE2   |
| 1139,274,OE2,273,H,274-OE2-273-H       | 1179,280,OD1,283,H,280-OD1-283-H       |
| 1140,274,OE1,276,H,274-OE1-276-H       | 1180,280,OD2,279,HH21,280-OD2-279-HH21 |
| 1141,274,OE2,275,H,274-OE2-275-H       | 1181,281,O,285,H,281-O-285-H           |
| 1142,274,OE2,277,H,274-OE2-277-H       | 1182,281,O,284,H,281-O-284-H           |
| 1143,274,O,279,HH22,274-O-279-HH22     | 1183,281,O,284,HG,281-O-284-HG         |
| 1144,274,OE1,274,H,274-OE1-274-H       | 1184,282,O,286,H,282-O-286-H           |
| 1145,274,OE1,275,H,274-OE1-275-H       | 1185,282,O,285,H,282-O-285-H           |
| 1146,274,O,275,HZ2,274-O-275-HZ2       | 1186,283,OD1,279,HH21,283-OD1-279-HH21 |
| 1147,274,O,279,HH12,274-O-279-HH12     | 1187,283,OD2,279,HE,283-OD2-279-HE     |
| 1148,274,O,272,HG1,274-O-272-HG1       | 1188,283,OD2,279,HH21,283-OD2-279-HH21 |
| 1149,274,O,279,HH11,274-O-279-HH11     | 1189,283,O,286,H,283-O-286-H           |
| 1150,274,OE2,279,HH22,274-OE2-279-HH22 | 1190,283,OD2,279,H,283-OD2-279-H       |
| 1151,274,OE2,276,H,274-OE2-276-H       | 1191,283,OD2,269,HE2,283-OD2-269-HE2   |
| 1152,274,OE1,279,HH22,274-OE1-279-HH22 | 1192,283,OD1,275,HZ3,283-OD1-275-HZ3   |

|                                        |                                        |
|----------------------------------------|----------------------------------------|
| 1193,283,O,275,HZ3,283-O-275-HZ3       | 1233,290,O,293,HE21,290-O-293-HE21     |
| 1194,283,OD1,275,HZ1,283-OD1-275-HZ1   | 1234,290,OE1,275,HZ2,290-OE1-275-HZ2   |
| 1195,283,O,275,HZ2,283-O-275-HZ2       | 1235,290,O,292,H,290-O-292-H           |
| 1196,283,OD2,275,HZ1,283-OD2-275-HZ1   | 1236,290,O,275,HZ2,290-O-275-HZ2       |
| 1197,283,OD2,275,HZ3,283-OD2-275-HZ3   | 1237,290,O,293,H,290-O-293-H           |
| 1198,283,OD2,275,HZ2,283-OD2-275-HZ2   | 1238,290,OE1,293,HE22,290-OE1-293-HE22 |
| 1199,283,OD1,275,HZ2,283-OD1-275-HZ2   | 1239,290,O,293,HE22,290-O-293-HE22     |
| 1200,283,O,287,H,283-O-287-H           | 1240,290,OE1,275,HZ3,290-OE1-275-HZ3   |
| 1201,283,O,275,HZ1,283-O-275-HZ1       | 1241,290,OE1,270,HH,290-OE1-270-HH     |
| 1202,283,OD1,279,HE,283-OD1-279-HE     | 1242,290,OE1,293,HE21,290-OE1-293-HE21 |
| 1203,283,OD1,269,HE2,283-OD1-269-HE2   | 1243,290,O,294,H,290-O-294-H           |
| 1204,284,O,288,H,284-O-288-H           | 1244,290,OE1,275,HZ1,290-OE1-275-HZ1   |
| 1205,285,O,288,H,285-O-288-H           | 1245,291,OE2,290,HE22,291-OE2-290-HE22 |
| 1206,285,O,289,H,285-O-289-H           | 1246,291,OE2,275,HZ2,291-OE2-275-HZ2   |
| 1207,286,O,290,HE22,286-O-290-HE22     | 1247,291,OE2,275,HZ3,291-OE2-275-HZ3   |
| 1208,286,O,290,H,286-O-290-H           | 1248,291,OE1,275,HZ2,291-OE1-275-HZ2   |
| 1209,286,O,289,H,286-O-289-H           | 1249,291,OE1,275,HZ3,291-OE1-275-HZ3   |
| 1210,286,O,290,HE21,286-O-290-HE21     | 1250,291,O,294,H,291-O-294-H           |
| 1211,287,OE1,275,HZ2,287-OE1-275-HZ2   | 1251,291,O,295,H,291-O-295-H           |
| 1212,287,OE1,275,HZ1,287-OE1-275-HZ1   | 1252,291,OE1,290,HE21,291-OE1-290-HE21 |
| 1213,287,O,290,HE21,287-O-290-HE21     | 1253,291,OE1,293,HE22,291-OE1-293-HE22 |
| 1214,287,OE1,275,HZ3,287-OE1-275-HZ3   | 1254,291,OE1,275,HZ1,291-OE1-275-HZ1   |
| 1215,287,OE2,290,HE21,287-OE2-290-HE21 | 1255,291,O,293,H,291-O-293-H           |
| 1216,287,O,291,H,287-O-291-H           | 1256,291,OE1,290,HE22,291-OE1-290-HE22 |
| 1217,287,OE2,275,HZ2,287-OE2-275-HZ2   | 1257,291,OE2,275,HZ1,291-OE2-275-HZ1   |
| 1218,287,OE1,290,HE22,287-OE1-290-HE22 | 1258,291,OE2,293,HE22,291-OE2-293-HE22 |
| 1219,287,OE1,290,HE21,287-OE1-290-HE21 | 1259,292,O,295,H,292-O-295-H           |
| 1220,287,OE1,284,HG,287-OE1-284-HG     | 1260,293,OE1,292,HZ2,293-OE1-292-HZ2   |
| 1221,287,OE2,275,HZ1,287-OE2-275-HZ1   | 1261,293,OE1,293,H,293-OE1-293-H       |
| 1222,287,O,290,H,287-O-290-H           | 1262,293,NE2,293,H,293-NE2-293-H       |
| 1223,287,OE2,275,HZ3,287-OE2-275-HZ3   | 1263,293,OE1,292,HZ3,293-OE1-292-HZ3   |
| 1224,287,OE2,290,HE22,287-OE2-290-HE22 | 1264,293,O,293,HE21,293-O-293-HE21     |
| 1225,288,O,292,H,288-O-292-H           | 1265,293,OE1,292,HZ1,293-OE1-292-HZ1   |
| 1226,288,O,291,H,288-O-291-H           | 1266,293,OE1,294,H,293-OE1-294-H       |
| 1227,289,O,292,HZ2,289-O-292-HZ2       | 1267,293,OE1,299,H,293-OE1-299-H       |
| 1228,289,O,292,H,289-O-292-H           | 1268,293,O,295,H,293-O-295-H           |
| 1229,289,O,292,HZ1,289-O-292-HZ1       | 1269,295,OD2,297,HD21,295-OD2-297-HD21 |
| 1230,289,O,293,HE22,289-O-293-HE22     | 1270,295,OD1,298,H,295-OD1-298-H       |
| 1231,289,O,292,HZ3,289-O-292-HZ3       | 1271,295,OD2,297,H,295-OD2-297-H       |
| 1232,289,O,293,HE21,289-O-293-HE21     | 1272,295,OD2,288,HE2,295-OD2-288-HE2   |

|                                        |                                        |
|----------------------------------------|----------------------------------------|
| 1273,295,OD1,296,H,295-OD1-296-H       | 1313,300,O,302,H,300-O-302-H           |
| 1274,295,OD1,297,H,295-OD1-297-H       | 1314,300,O,292,HZ1,300-O-292-HZ1       |
| 1275,295,OD2,136,HH12,295-OD2-136-HH12 | 1315,301,O,306,HZ2,301-O-306-HZ2       |
| 1276,295,OD1,297,HD21,295-OD1-297-HD21 | 1316,301,OE1,301,H,301-OE1-301-H       |
| 1277,295,OD2,298,H,295-OD2-298-H       | 1317,301,O,306,HZ3,301-O-306-HZ3       |
| 1278,295,OD2,296,H,295-OD2-296-H       | 1318,301,O,301,HE21,301-O-301-HE21     |
| 1279,295,OD1,288,HE2,295-OD1-288-HE2   | 1319,301,O,303,H,301-O-303-H           |
| 1280,295,O,298,H,295-O-298-H           | 1320,301,OE1,299,HD22,301-OE1-299-HD22 |
| 1281,295,OD1,136,HH22,295-OD1-136-HH22 | 1321,301,OE1,299,HD21,301-OE1-299-HD21 |
| 1282,296,OE1,136,HH12,296-OE1-136-HH12 | 1322,301,O,306,HZ1,301-O-306-HZ1       |
| 1283,296,O,298,H,296-O-298-H           | 1323,302,O,292,HZ1,302-O-292-HZ1       |
| 1284,296,OE1,136,HH22,296-OE1-136-HH22 | 1324,302,O,292,HZ2,302-O-292-HZ2       |
| 1285,296,OE2,136,HH12,296-OE2-136-HH12 | 1325,302,O,292,HZ3,302-O-292-HZ3       |
| 1286,296,OE1,297,HD22,296-OE1-297-HD22 | 1326,303,OG,306,HZ1,303-OG-306-HZ1     |
| 1287,296,OE2,136,HH22,296-OE2-136-HH22 | 1327,303,O,292,HZ2,303-O-292-HZ2       |
| 1288,296,OE1,297,HD21,296-OE1-297-HD21 | 1328,303,OG,305,H,303-OG-305-H         |
| 1289,296,OE2,297,HD21,296-OE2-297-HD21 | 1329,303,OG,306,HZ2,303-OG-306-HZ2     |
| 1290,296,OE1,296,H,296-OE1-296-H       | 1330,303,O,307,H,303-O-307-H           |
| 1291,296,OE2,296,H,296-OE2-296-H       | 1331,303,OG,306,H,303-OG-306-H         |
| 1292,296,OE2,297,HD22,296-OE2-297-HD22 | 1332,303,O,306,H,303-O-306-H           |
| 1293,297,OD1,136,HE,297-OD1-136-HE     | 1333,304,OD1,292,HZ3,304-OD1-292-HZ3   |
| 1294,297,OD1,136,HH22,297-OD1-136-HH22 | 1334,304,OD2,292,HZ3,304-OD2-292-HZ3   |
| 1295,297,O,134,HH21,297-O-134-HH21     | 1335,304,OD1,270,HH,304-OD1-270-HH     |
| 1296,297,O,288,HE2,297-O-288-HE2       | 1336,304,OD2,305,H,304-OD2-305-H       |
| 1297,297,OD1,136,HH21,297-OD1-136-HH21 | 1337,304,OD2,292,HZ2,304-OD2-292-HZ2   |
| 1298,297,OD1,136,HH11,297-OD1-136-HH11 | 1338,304,OD2,304,H,304-OD2-304-H       |
| 1299,297,O,297,HD21,297-O-297-HD21     | 1339,304,OD1,292,HZ2,304-OD1-292-HZ2   |
| 1300,298,O,299,HD22,298-O-299-HD22     | 1340,304,O,308,H,304-O-308-H           |
| 1301,298,O,300,H,298-O-300-H           | 1341,304,OD2,292,HZ1,304-OD2-292-HZ1   |
| 1302,299,O,293,HE22,299-O-293-HE22     | 1342,304,OD1,292,HZ1,304-OD1-292-HZ1   |
| 1303,299,OD1,300,H,299-OD1-300-H       | 1343,304,OD2,290,HE22,304-OD2-290-HE22 |
| 1304,299,OD1,301,HE21,299-OD1-301-HE21 | 1344,304,OD2,270,HH,304-OD2-270-HH     |
| 1305,299,OD1,301,H,299-OD1-301-H       | 1345,304,OD1,305,H,304-OD1-305-H       |
| 1306,299,O,302,H,299-O-302-H           | 1346,304,O,307,H,304-O-307-H           |
| 1307,299,OD1,301,HE22,299-OD1-301-HE22 | 1347,304,OD1,304,H,304-OD1-304-H       |
| 1308,299,ND2,301,HE22,299-ND2-301-HE22 | 1348,305,O,259,HH,305-O-259-HH         |
| 1309,299,OD1,302,H,299-OD1-302-H       | 1349,305,OE1,263,HE21,305-OE1-263-HE21 |
| 1310,300,O,293,HE22,300-O-293-HE22     | 1350,305,OE2,270,HH,305-OE2-270-HH     |
| 1311,300,O,292,HZ3,300-O-292-HZ3       | 1351,305,OE2,117,HD22,305-OE2-117-HD22 |
| 1312,300,O,292,HZ2,300-O-292-HZ2       | 1352,305,OE2,305,H,305-OE2-305-H       |

|                                        |                                        |
|----------------------------------------|----------------------------------------|
| 1353,305,OE1,306,HZ1,305-OE1-306-HZ1   | 1393,309,OD1,134,HH12,309-OD1-134-HH12 |
| 1354,305,OE1,259,HH,305-OE1-259-HH     | 1394,309,O,309,HD22,309-O-309-HD22     |
| 1355,305,OE2,117,HD21,305-OE2-117-HD21 | 1395,309,O,312,H,309-O-312-H           |
| 1356,305,OE1,306,HZ3,305-OE1-306-HZ3   | 1396,309,OD1,117,HD22,309-OD1-117-HD22 |
| 1357,305,OE1,270,HH,305-OE1-270-HH     | 1397,310,O,314,H,310-O-314-H           |
| 1358,305,OE2,309,HD22,305-OE2-309-HD22 | 1398,310,O,313,H,310-O-313-H           |
| 1359,305,OE2,303,HG,305-OE2-303-HG     | 1399,311,O,314,H,311-O-314-H           |
| 1360,305,OE1,117,HD21,305-OE1-117-HD21 | 1400,311,O,315,H,311-O-315-H           |
| 1361,305,OE1,306,HZ2,305-OE1-306-HZ2   | 1401,312,O,516,H13,312-O-516-H13       |
| 1362,305,OE1,119,HE21,305-OE1-119-HE21 | 1402,312,O,316,H,312-O-316-H           |
| 1363,305,O,117,HD22,305-O-117-HD22     | 1403,313,OD1,309,HD22,313-OD1-309-HD22 |
| 1364,305,O,309,HD22,305-O-309-HD22     | 1404,313,OD2,121,H,313-OD2-121-H       |
| 1365,305,OE2,306,HZ2,305-OE2-306-HZ2   | 1405,313,OD2,309,HD22,313-OD2-309-HD22 |
| 1366,305,OE1,263,HE22,305-OE1-263-HE22 | 1406,313,OD1,313,H,313-OD1-313-H       |
| 1367,305,OE2,263,HE21,305-OE2-263-HE21 | 1407,313,OD2,120,HG,313-OD2-120-HG     |
| 1368,305,OE1,305,H,305-OE1-305-H       | 1408,313,OD1,516,H13,313-OD1-516-H13   |
| 1369,305,OE2,263,HE22,305-OE2-263-HE22 | 1409,313,OD1,120,HG,313-OD1-120-HG     |
| 1370,305,O,119,HE22,305-O-119-HE22     | 1410,313,OD1,116,HG,313-OD1-116-HG     |
| 1371,305,O,309,H,305-O-309-H           | 1411,313,OD2,122,HG,313-OD2-122-HG     |
| 1372,305,OE1,119,HE22,305-OE1-119-HE22 | 1412,313,OD1,122,HG,313-OD1-122-HG     |
| 1373,305,OE2,306,HZ1,305-OE2-306-HZ1   | 1413,313,OD2,309,HD21,313-OD2-309-HD21 |
| 1374,305,OE1,117,HD22,305-OE1-117-HD22 | 1414,313,O,317,H,313-O-317-H           |
| 1375,305,OE2,259,HH,305-OE2-259-HH     | 1415,313,OD1,122,H,313-OD1-122-H       |
| 1376,305,OE1,303,HG,305-OE1-303-HG     | 1416,313,OD2,116,HG,313-OD2-116-HG     |
| 1377,305,OE2,306,HZ3,305-OE2-306-HZ3   | 1417,313,OD1,121,H,313-OD1-121-H       |
| 1378,306,O,134,HH12,306-O-134-HH12     | 1418,313,OD2,122,H,313-OD2-122-H       |
| 1379,306,O,119,HE21,306-O-119-HE21     | 1419,313,OD2,516,H13,313-OD2-516-H13   |
| 1380,306,O,309,HD21,306-O-309-HD21     | 1420,314,O,318,H,314-O-318-H           |
| 1381,306,O,134,HE,306-O-134-HE         | 1421,314,O,317,H,314-O-317-H           |
| 1382,306,O,119,HE22,306-O-119-HE22     | 1422,315,O,317,H,315-O-317-H           |
| 1383,306,O,134,HH21,306-O-134-HH21     | 1423,315,O,319,H,315-O-319-H           |
| 1384,306,O,134,HH22,306-O-134-HH22     | 1424,316,O,516,H13,316-O-516-H13       |
| 1385,307,O,310,H,307-O-310-H           | 1425,316,O,320,H,316-O-320-H           |
| 1386,307,O,134,HH21,307-O-134-HH21     | 1426,317,O,322,H,317-O-322-H           |
| 1387,308,O,311,H,308-O-311-H           | 1427,317,O,321,H,317-O-321-H           |
| 1388,308,O,310,H,308-O-310-H           | 1428,317,O,320,H,317-O-320-H           |
| 1389,309,OD1,134,HH22,309-OD1-134-HH22 | 1429,317,O,321,HG1,317-O-321-HG1       |
| 1390,309,OD1,134,HH21,309-OD1-134-HH21 | 1430,318,O,322,H,318-O-322-H           |
| 1391,309,OD1,119,HE21,309-OD1-119-HE21 | 1431,318,O,323,HG1,318-O-323-HG1       |
| 1392,309,O,313,H,309-O-313-H           | 1432,318,O,323,H,318-O-323-H           |

|                                        |                                        |
|----------------------------------------|----------------------------------------|
| 1433,319,O,323,HG1,319-O-323-HG1       | 1473,325,O,329,H,325-O-329-H           |
| 1434,319,O,221,HD22,319-O-221-HD22     | 1474,325,O,329,HG,325-O-329-HG         |
| 1435,319,O,221,HD21,319-O-221-HD21     | 1475,326,O,329,H,326-O-329-H           |
| 1436,319,O,222,HD22,319-O-222-HD22     | 1476,326,O,329,HG,326-O-329-HG         |
| 1437,319,O,222,HD21,319-O-222-HD21     | 1477,326,O,330,H,326-O-330-H           |
| 1438,320,OD1,222,H,320-OD1-222-H       | 1478,327,O,331,H,327-O-331-H           |
| 1439,320,OD1,324,HG1,320-OD1-324-HG1   | 1479,328,O,332,H,328-O-332-H           |
| 1440,320,O,324,H,320-O-324-H           | 1480,328,O,331,H,328-O-331-H           |
| 1441,320,OD2,499,HZ1,320-OD2-499-HZ1   | 1481,329,O,333,H,329-O-333-H           |
| 1442,320,OD2,499,HZ3,320-OD2-499-HZ3   | 1482,330,O,333,H,330-O-333-H           |
| 1443,320,OD1,499,HZ1,320-OD1-499-HZ1   | 1483,330,O,334,H,330-O-334-H           |
| 1444,320,OD2,187,HH,320-OD2-187-HH     | 1484,331,O,334,H,331-O-334-H           |
| 1445,320,OD2,499,HZ2,320-OD2-499-HZ2   | 1485,331,O,335,H,331-O-335-H           |
| 1446,320,OD1,221,HD21,320-OD1-221-HD21 | 1486,332,O,336,H,332-O-336-H           |
| 1447,320,OD1,222,HD21,320-OD1-222-HD21 | 1487,332,O,335,H,332-O-335-H           |
| 1448,320,OD2,222,HD21,320-OD2-222-HD21 | 1488,332,O,336,HD22,332-O-336-HD22     |
| 1449,320,OD1,497,HG1,320-OD1-497-HG1   | 1489,333,O,336,H,333-O-336-H           |
| 1450,320,OD2,221,HD21,320-OD2-221-HD21 | 1490,333,O,340,HE21,333-O-340-HE21     |
| 1451,320,OD1,222,HD22,320-OD1-222-HD22 | 1491,335,O,336,HD22,335-O-336-HD22     |
| 1452,320,OD2,324,HG1,320-OD2-324-HG1   | 1492,336,OD1,338,H,336-OD1-338-H       |
| 1453,320,O,324,HG1,320-O-324-HG1       | 1493,336,OD1,339,H,336-OD1-339-H       |
| 1454,320,OD1,499,HZ2,320-OD1-499-HZ2   | 1494,336,O,340,H,336-O-340-H           |
| 1455,320,OD2,222,HD22,320-OD2-222-HD22 | 1495,336,O,339,H,336-O-339-H           |
| 1456,320,OD2,497,HG1,320-OD2-497-HG1   | 1496,337,O,340,H,337-O-340-H           |
| 1457,320,OD1,187,HH,320-OD1-187-HH     | 1497,337,O,341,H,337-O-341-H           |
| 1458,320,OD1,499,HZ3,320-OD1-499-HZ3   | 1498,338,O,342,H,338-O-342-H           |
| 1459,321,O,325,H,321-O-325-H           | 1499,339,O,343,H,339-O-343-H           |
| 1460,321,OG1,322,H,321-OG1-322-H       | 1500,339,O,342,H,339-O-342-H           |
| 1461,321,O,324,H,321-O-324-H           | 1501,340,OE1,344,HE21,340-OE1-344-HE21 |
| 1462,322,O,325,H,322-O-325-H           | 1502,340,O,343,H,340-O-343-H           |
| 1463,322,O,326,H,322-O-326-H           | 1503,340,O,344,H,340-O-344-H           |
| 1464,323,O,327,HG,323-O-327-HG         | 1504,340,OE1,344,HE22,340-OE1-344-HE22 |
| 1465,323,O,327,H,323-O-327-H           | 1505,340,OE1,480,H,340-OE1-480-H       |
| 1466,324,OG1,497,HG1,324-OG1-497-HG1   | 1506,341,O,345,H,341-O-345-H           |
| 1467,324,OG1,499,HZ3,324-OG1-499-HZ3   | 1507,342,O,342,HZ2,342-O-342-HZ2       |
| 1468,324,O,328,H,324-O-328-H           | 1508,342,O,346,H,342-O-346-H           |
| 1469,324,O,327,HG,324-O-327-HG         | 1509,342,O,345,H,342-O-345-H           |
| 1470,324,OG1,499,HZ1,324-OG1-499-HZ1   | 1510,343,O,347,H,343-O-347-H           |
| 1471,324,O,327,H,324-O-327-H           | 1511,343,O,346,H,343-O-346-H           |
| 1472,324,OG1,499,HZ2,324-OG1-499-HZ2   | 1512,344,OE1,341,HH11,344-OE1-341-HH11 |

1513,344,O,511,HH22,344-O-511-HH22  
1514,344,O,348,H,344-O-348-H  
1515,344,OE1,341,HE,344-OE1-341-HE  
1516,344,O,511,HH12,344-O-511-HH12  
1517,344,OE1,341,HH21,344-OE1-341-HH21  
1518,345,OE2,341,HH12,345-OE2-341-HH12  
1519,345,OE2,342,HZ1,345-OE2-342-HZ1  
1520,345,OE1,342,HZ3,345-OE1-342-HZ3  
1521,345,OE2,341,HH11,345-OE2-341-HH11  
1522,345,OE1,342,HZ1,345-OE1-342-HZ1  
1523,345,OE2,341,HE,345-OE2-341-HE  
1524,345,OE2,342,HZ2,345-OE2-342-HZ2  
1525,345,O,348,H,345-O-348-H  
1526,345,OE1,341,HH22,345-OE1-341-HH22  
1527,345,OE2,341,HH22,345-OE2-341-HH22  
1528,345,OE1,341,HH21,345-OE1-341-HH21  
1529,345,OE1,341,HH12,345-OE1-341-HH12  
1530,345,OE1,341,HE,345-OE1-341-HE  
1531,345,OE2,341,HH21,345-OE2-341-HH21  
1532,345,O,349,H,345-O-349-H  
1533,345,OE1,341,HH11,345-OE1-341-HH11  
1534,345,OE2,342,HZ3,345-OE2-342-HZ3  
1535,345,OE1,342,HZ2,345-OE1-342-HZ2  
1536,345,O,349,HG1,345-O-349-HG1  
1537,346,OE2,367,H,346-OE2-367-H  
1538,346,O,350,H,346-O-350-H  
1539,346,OE1,349,HG1,346-OE1-349-HG1  
1540,346,OE1,342,HZ1,346-OE1-342-HZ1  
1541,346,OE1,342,HZ2,346-OE1-342-HZ2  
1542,346,OE1,368,H,346-OE1-368-H  
1543,346,OE2,342,HZ1,346-OE2-342-HZ1  
1544,346,OE2,342,HZ3,346-OE2-342-HZ3  
1545,346,OE1,367,H,346-OE1-367-H  
1546,346,O,349,H,346-O-349-H  
1547,346,OE2,342,HZ2,346-OE2-342-HZ2  
1548,346,OE1,342,HZ3,346-OE1-342-HZ3  
1549,347,O,351,H,347-O-351-H  
1550,347,O,352,H,347-O-352-H  
1551,348,OD2,353,HE,348-OD2-353-HE  
1552,348,OD1,511,HH22,348-OD1-511-HH22  
1553,348,O,352,H,348-O-352-H  
1554,348,OD2,511,HH22,348-OD2-511-HH22  
1555,348,OD2,353,HH21,348-OD2-353-HH21  
1556,348,OD2,511,HH12,348-OD2-511-HH12  
1557,348,OD1,353,HE,348-OD1-353-HE  
1558,348,OD1,353,HH21,348-OD1-353-HH21  
1559,348,OD1,511,HH12,348-OD1-511-HH12  
1560,350,O,364,HE2,350-O-364-HE2  
1561,350,O,355,HH21,350-O-355-HH21  
1562,351,O,354,H,351-O-354-H  
1563,351,O,354,HG,351-O-354-HG  
1564,352,O,354,H,352-O-354-H  
1565,352,O,476,HE21,352-O-476-HE21  
1566,353,O,355,H,353-O-355-H  
1567,354,O,354,HG,354-O-354-HG  
1568,354,OG,355,H,354-OG-355-H  
1569,355,O,476,HE22,355-O-476-HE22  
1570,356,O,355,HH11,356-O-355-HH11  
1571,358,O,361,H,358-O-361-H  
1572,359,O,465,HE1,359-O-465-HE1  
1573,359,O,362,H,359-O-362-H  
1574,360,O,363,H,360-O-363-H  
1575,360,OG,358,HE,360-OG-358-HE  
1576,360,O,363,HG,360-O-363-HG  
1577,360,O,360,HG,360-O-360-HG  
1578,361,OD2,355,HH22,361-OD2-355-HH22  
1579,361,O,365,H,361-O-365-H  
1580,361,OD1,355,HH22,361-OD1-355-HH22  
1581,361,OD2,358,HH21,361-OD2-358-HH21  
1582,361,OD1,358,HE,361-OD1-358-HE  
1583,361,OD1,358,HH11,361-OD1-358-HH11  
1584,361,OD1,358,HH21,361-OD1-358-HH21  
1585,361,OD2,358,H,361-OD2-358-H  
1586,361,OD1,360,HG,361-OD1-360-HG  
1587,361,OD2,355,HH12,361-OD2-355-HH12  
1588,361,O,364,H,361-O-364-H  
1589,361,OD2,358,HE,361-OD2-358-HE  
1590,361,OD1,364,HE2,361-OD1-364-HE2  
1591,362,O,365,H,362-O-365-H  
1592,364,ND1,363,HG,364-ND1-363-HG



|                                        |                                        |
|----------------------------------------|----------------------------------------|
| 1593,365,O,368,H,365-O-368-H           | 1633,374,OE1,377,HE,374-OE1-377-HE     |
| 1594,365,O,369,H,365-O-369-H           | 1634,374,OE2,431,HH22,374-OE2-431-HH22 |
| 1595,366,O,370,H,366-O-370-H           | 1635,374,OE2,428,H,374-OE2-428-H       |
| 1596,366,O,369,H,366-O-369-H           | 1636,375,O,379,H,375-O-379-H           |
| 1597,367,O,370,H,367-O-370-H           | 1637,375,OG1,329,HG,375-OG1-329-HG     |
| 1598,367,O,371,H,367-O-371-H           | 1638,375,O,379,HG,375-O-379-HG         |
| 1599,368,O,371,H,368-O-371-H           | 1639,376,O,380,H,376-O-380-H           |
| 1600,368,O,372,H,368-O-372-H           | 1640,377,O,416,HE2,377-O-416-HE2       |
| 1601,369,OE1,362,HE,369-OE1-362-HE     | 1641,377,O,380,HG,377-O-380-HG         |
| 1602,369,OE2,465,HE1,369-OE2-465-HE1   | 1642,378,ND1,332,HH,378-ND1-332-HH     |
| 1603,369,OE2,464,HH21,369-OE2-464-HH21 | 1643,378,O,416,HE2,378-O-416-HE2       |
| 1604,369,OE2,362,HH11,369-OE2-362-HH11 | 1644,379,O,412,HE1,379-O-412-HE1       |
| 1605,369,OE1,464,HE,369-OE1-464-HE     | 1645,379,OG,381,H,379-OG-381-H         |
| 1606,369,O,373,H,369-O-373-H           | 1646,380,O,380,HG,380-O-380-HG         |
| 1607,369,OE1,465,HE1,369-OE1-465-HE1   | 1647,380,O,382,H,380-O-382-H           |
| 1608,369,OE2,464,HE,369-OE2-464-HE     | 1648,380,OG,416,HE2,380-OG-416-HE2     |
| 1609,369,O,372,H,369-O-372-H           | 1649,380,OG,415,HD22,380-OG-415-HD22   |
| 1610,369,OE2,362,HH12,369-OE2-362-HH12 | 1650,381,O,498,H,381-O-498-H           |
| 1611,369,OE2,362,HE,369-OE2-362-HE     | 1651,381,O,497,HG1,381-O-497-HG1       |
| 1612,369,OE2,464,HH22,369-OE2-464-HH22 | 1652,382,O,411,HE21,382-O-411-HE21     |
| 1613,369,OE1,362,HH21,369-OE1-362-HH21 | 1653,383,O,411,H,383-O-411-H           |
| 1614,369,OE1,464,HH21,369-OE1-464-HH21 | 1654,383,O,412,H,383-O-412-H           |
| 1615,369,OE2,362,HH21,369-OE2-362-HH21 | 1655,385,O,230,HG,385-O-230-HG         |
| 1616,369,OE1,362,HH11,369-OE1-362-HH11 | 1656,385,OG1,409,H,385-OG1-409-H       |
| 1617,370,O,374,H,370-O-374-H           | 1657,386,O,385,HG1,386-O-385-HG1       |
| 1618,371,O,375,H,371-O-375-H           | 1658,386,O,106,HH12,386-O-106-HH12     |
| 1619,371,O,375,HG1,371-O-375-HG1       | 1659,386,O,106,HH11,386-O-106-HH11     |
| 1620,372,O,375,H,372-O-375-H           | 1660,387,O,106,HH11,387-O-106-HH11     |
| 1621,372,O,376,H,372-O-376-H           | 1661,388,O,407,H,388-O-407-H           |
| 1622,373,O,377,H,373-O-377-H           | 1662,388,NE2,385,HG1,388-NE2-385-HG1   |
| 1623,374,OE1,431,HH22,374-OE1-431-HH22 | 1663,388,O,389,HG,388-O-389-HG         |
| 1624,374,OE2,431,HH12,374-OE2-431-HH12 | 1664,389,O,105,H,389-O-105-H           |
| 1625,374,OE2,431,HH11,374-OE2-431-HH11 | 1665,389,O,389,HG,389-O-389-HG         |
| 1626,374,OE1,428,H,374-OE1-428-H       | 1666,389,O,391,H,389-O-391-H           |
| 1627,374,O,378,H,374-O-378-H           | 1667,390,OG1,405,H,390-OG1-405-H       |
| 1628,374,OE1,431,HH12,374-OE1-431-HH12 | 1668,390,O,404,H,390-O-404-H           |
| 1629,374,OE2,377,HH21,374-OE2-377-HH21 | 1669,390,OG1,404,H,390-OG1-404-H       |
| 1630,374,OE1,431,HH11,374-OE1-431-HH11 | 1670,391,OG1,104,HZ3,391-OG1-104-HZ3   |
| 1631,374,OE1,377,HH21,374-OE1-377-HH21 | 1671,391,O,403,HZ2,391-O-403-HZ2       |
| 1632,374,OE2,377,HE,374-OE2-377-HE     | 1672,391,OG1,105,H,391-OG1-105-H       |

|                                      |                                        |
|--------------------------------------|----------------------------------------|
| 1673,391,O,403,HZ1,391-O-403-HZ1     | 1713,405,O,389,HG,405-O-389-HG         |
| 1674,391,OG1,104,HZ2,391-OG1-104-HZ2 | 1714,405,O,390,H,405-O-390-H           |
| 1675,391,O,403,HZ3,391-O-403-HZ3     | 1715,406,O,84,H,406-O-84-H             |
| 1676,391,OG1,104,H,391-OG1-104-H     | 1716,407,O,388,H,407-O-388-H           |
| 1677,391,OG1,104,HZ1,391-OG1-104-HZ1 | 1717,408,O,86,H,408-O-86-H             |
| 1678,393,O,392,HH11,393-O-392-HH11   | 1718,409,O,385,H,409-O-385-H           |
| 1679,393,OD1,400,HH,393-OD1-400-HH   | 1719,409,O,411,H,409-O-411-H           |
| 1680,393,OD1,393,H,393-OD1-393-H     | 1720,410,OD1,413,H,410-OD1-413-H       |
| 1681,393,OD2,393,H,393-OD2-393-H     | 1721,410,OD1,411,H,410-OD1-411-H       |
| 1682,393,OD1,403,HZ3,393-OD1-403-HZ3 | 1722,410,O,413,H,410-O-413-H           |
| 1683,393,OD1,403,H,393-OD1-403-H     | 1723,410,OD1,412,H,410-OD1-412-H       |
| 1684,393,OD2,403,H,393-OD2-403-H     | 1724,411,OE1,451,H,411-OE1-451-H       |
| 1685,393,OD2,403,HZ1,393-OD2-403-HZ1 | 1725,411,O,415,H,411-O-415-H           |
| 1686,393,OD2,400,HH,393-OD2-400-HH   | 1726,411,O,414,H,411-O-414-H           |
| 1687,393,OD1,403,HZ2,393-OD1-403-HZ2 | 1727,411,O,415,HD22,411-O-415-HD22     |
| 1688,393,OD2,403,HZ2,393-OD2-403-HZ2 | 1728,412,O,416,H,412-O-416-H           |
| 1689,393,OD1,403,HZ1,393-OD1-403-HZ1 | 1729,412,O,414,H,412-O-414-H           |
| 1690,393,OD2,403,HZ3,393-OD2-403-HZ3 | 1730,412,O,415,H,412-O-415-H           |
| 1691,394,O,401,H,394-O-401-H         | 1731,413,OE1,67,HG,413-OE1-67-HG       |
| 1692,394,O,395,HG,394-O-395-HG       | 1732,413,O,413,HE21,413-O-413-HE21     |
| 1693,394,OG1,395,H,394-OG1-395-H     | 1733,413,NE2,87,HG,413-NE2-87-HG       |
| 1694,394,OG1,99,HE22,394-OG1-99-HE22 | 1734,413,O,416,H,413-O-416-H           |
| 1695,394,OG1,99,HE21,394-OG1-99-HE21 | 1735,413,OE1,68,HE21,413-OE1-68-HE21   |
| 1696,395,O,99,HE22,395-O-99-HE22     | 1736,413,NE2,68,HE22,413-NE2-68-HE22   |
| 1697,395,O,99,HE21,395-O-99-HE21     | 1737,413,OE1,87,HG,413-OE1-87-HG       |
| 1698,396,O,398,H,396-O-398-H         | 1738,413,OE1,410,HD22,413-OE1-410-HD22 |
| 1699,396,O,399,H,396-O-399-H         | 1739,413,NE2,68,HE21,413-NE2-68-HE21   |
| 1700,397,O,38,HZ3,397-O-38-HZ3       | 1740,413,O,417,H,413-O-417-H           |
| 1701,398,O,38,H,398-O-38-H           | 1741,414,O,421,HE1,414-O-421-HE1       |
| 1702,398,O,38,HZ3,398-O-38-HZ3       | 1742,414,O,417,H,414-O-417-H           |
| 1703,398,O,38,HZ1,398-O-38-HZ1       | 1743,415,OD1,448,H,415-OD1-448-H       |
| 1704,398,O,38,HZ2,398-O-38-HZ2       | 1744,415,O,377,HH11,415-O-377-HH11     |
| 1705,399,O,395,HG,399-O-395-HG       | 1745,416,ND1,377,HH12,416-ND1-377-HH12 |
| 1706,399,O,396,H,399-O-396-H         | 1746,417,OD2,419,HZ3,417-OD2-419-HZ3   |
| 1707,400,O,39,HD22,400-O-39-HD22     | 1747,417,OD1,418,HE21,417-OD1-418-HE21 |
| 1708,401,O,394,H,401-O-394-H         | 1748,417,OD2,420,H,417-OD2-420-H       |
| 1709,402,O,390,HG1,402-O-390-HG1     | 1749,417,OD2,413,HE22,417-OD2-413-HE22 |
| 1710,403,O,405,HH11,403-O-405-HH11   | 1750,417,OD1,413,HE21,417-OD1-413-HE21 |
| 1711,404,O,405,HH11,404-O-405-HH11   | 1751,417,OD1,68,HE22,417-OD1-68-HE22   |
| 1712,405,O,390,HG1,405-O-390-HG1     | 1752,417,OD2,419,HZ1,417-OD2-419-HZ1   |

|                                        |                                        |
|----------------------------------------|----------------------------------------|
| 1753,417,OD1,419,H,417-OD1-419-H       | 1793,426,O,431,HH22,426-O-431-HH22     |
| 1754,417,OD1,420,H,417-OD1-420-H       | 1794,426,OE1,427,H,426-OE1-427-H       |
| 1755,417,O,420,H,417-O-420-H           | 1795,426,OE1,423,HD21,426-OE1-423-HD21 |
| 1756,417,OD2,68,HE22,417-OD2-68-HE22   | 1796,426,OE2,425,HG,426-OE2-425-HG     |
| 1757,417,OD1,419,HZ3,417-OD1-419-HZ3   | 1797,426,OE2,427,H,426-OE2-427-H       |
| 1758,417,OD2,419,HZ2,417-OD2-419-HZ2   | 1798,426,OE2,423,HD21,426-OE2-423-HD21 |
| 1759,417,O,421,H,417-O-421-H           | 1799,426,OE1,423,HD22,426-OE1-423-HD22 |
| 1760,417,OD1,419,HZ2,417-OD1-419-HZ2   | 1800,426,OE1,425,HG,426-OE1-425-HG     |
| 1761,417,OD1,419,HZ1,417-OD1-419-HZ1   | 1801,427,O,338,HH21,427-O-338-HH21     |
| 1762,417,OD2,419,H,417-OD2-419-H       | 1802,428,O,431,H,428-O-431-H           |
| 1763,417,OD2,413,HE21,417-OD2-413-HE21 | 1803,428,O,431,HH11,428-O-431-HH11     |
| 1764,418,OE1,68,HE22,418-OE1-68-HE22   | 1804,429,O,432,H,429-O-432-H           |
| 1765,418,OE1,423,H,418-OE1-423-H       | 1805,429,O,433,H,429-O-433-H           |
| 1766,418,OE1,419,H,418-OE1-419-H       | 1806,430,OE1,430,H,430-OE1-430-H       |
| 1767,418,NE2,418,H,418-NE2-418-H       | 1807,430,OE1,342,HZ1,430-OE1-342-HZ1   |
| 1768,418,OE1,418,H,418-OE1-418-H       | 1808,430,OE2,367,HH,430-OE2-367-HH     |
| 1769,418,O,420,H,418-O-420-H           | 1809,430,OE2,430,H,430-OE2-430-H       |
| 1770,418,O,418,HE21,418-O-418-HE21     | 1810,430,OE1,338,HH12,430-OE1-338-HH12 |
| 1771,420,O,446,HZ1,420-O-446-HZ1       | 1811,430,OE1,342,HZ3,430-OE1-342-HZ3   |
| 1772,420,O,422,H,420-O-422-H           | 1812,430,OE2,338,HH22,430-OE2-338-HH22 |
| 1773,420,O,446,HZ2,420-O-446-HZ2       | 1813,430,OE2,342,HZ3,430-OE2-342-HZ3   |
| 1774,420,O,446,HZ3,420-O-446-HZ3       | 1814,430,OE1,342,HZ2,430-OE1-342-HZ2   |
| 1775,421,O,418,HE21,421-O-418-HE21     | 1815,430,O,433,H,430-O-433-H           |
| 1776,422,O,431,HE,422-O-431-HE         | 1816,430,OE2,342,HZ1,430-OE2-342-HZ1   |
| 1777,422,O,431,HH21,422-O-431-HH21     | 1817,430,OE1,338,HH22,430-OE1-338-HH22 |
| 1778,423,OD1,426,H,423-OD1-426-H       | 1818,430,OE2,342,HZ2,430-OE2-342-HZ2   |
| 1779,423,O,431,HH22,423-O-431-HH22     | 1819,430,OE2,338,HH12,430-OE2-338-HH12 |
| 1780,423,OD1,418,HE22,423-OD1-418-HE22 | 1820,430,OE1,367,HH,430-OE1-367-HH     |
| 1781,423,O,426,H,423-O-426-H           | 1821,432,O,440,H,432-O-440-H           |
| 1782,423,O,431,HH21,423-O-431-HH21     | 1822,434,OG1,436,H,434-OG1-436-H       |
| 1783,423,OD1,425,H,423-OD1-425-H       | 1823,434,OG1,437,H,434-OG1-437-H       |
| 1784,423,O,423,HD22,423-O-423-HD22     | 1824,434,OG1,438,H,434-OG1-438-H       |
| 1785,423,OD1,425,HG,423-OD1-425-HG     | 1825,434,O,437,H,434-O-437-H           |
| 1786,424,O,377,HH12,424-O-377-HH12     | 1826,436,OD2,434,HG1,436-OD2-434-HG1   |
| 1787,424,O,377,HH22,424-O-377-HH22     | 1827,436,OD2,438,H,436-OD2-438-H       |
| 1788,425,O,425,HG,425-O-425-HG         | 1828,436,OD1,434,HG1,436-OD1-434-HG1   |
| 1789,425,O,378,HE2,425-O-378-HE2       | 1829,436,OD1,436,H,436-OD1-436-H       |
| 1790,426,OE2,423,HD22,426-OE2-423-HD22 | 1830,436,OD1,438,H,436-OD1-438-H       |
| 1791,426,O,431,HH12,426-O-431-HH12     | 1831,436,O,438,H,436-O-438-H           |
| 1792,426,O,431,HH21,426-O-431-HH21     | 1832,436,OD2,436,H,436-OD2-436-H       |

1833,438,O,434,HG1,438-O-434-HG1  
1834,438,O,434,H,438-O-434-H  
1835,439,O,441,HZ3,439-O-441-HZ3  
1836,439,O,441,H,439-O-441-H  
1837,439,O,441,HZ1,439-O-441-HZ1  
1838,439,O,441,HZ2,439-O-441-HZ2  
1839,440,OD2,442,H,440-OD2-442-H  
1840,440,O,444,HG,440-O-444-HG  
1841,440,OD2,441,H,440-OD2-441-H  
1842,440,OD1,442,H,440-OD1-442-H  
1843,440,O,443,H,440-O-443-H  
1844,440,O,444,H,440-O-444-H  
1845,440,OD2,443,H,440-OD2-443-H  
1846,440,O,442,H,440-O-442-H  
1847,440,OD1,443,H,440-OD1-443-H  
1848,441,O,444,H,441-O-444-H  
1849,441,O,445,H,441-O-445-H  
1850,441,O,444,HG,441-O-444-HG  
1851,442,O,445,H,442-O-445-H  
1852,442,O,446,H,442-O-446-H  
1853,442,O,446,HZ3,442-O-446-HZ3  
1854,442,O,446,HZ2,442-O-446-HZ2  
1855,442,O,446,HZ1,442-O-446-HZ1  
1856,443,O,447,H,443-O-447-H  
1857,443,O,446,H,443-O-446-H  
1858,444,O,464,HH22,444-O-464-HH22  
1859,444,O,447,H,444-O-447-H  
1860,444,OG,464,HH22,444-OG-464-HH22  
1861,445,OE2,446,HZ3,445-OE2-446-HZ3  
1862,445,OE1,441,HZ3,445-OE1-441-HZ3  
1863,445,OE2,93,HE,445-OE2-93-HE  
1864,445,OE1,441,HZ1,445-OE1-441-HZ1  
1865,445,OE2,441,HZ2,445-OE2-441-HZ2  
1866,445,OE2,444,HG,445-OE2-444-HG  
1867,445,OE1,93,HH12,445-OE1-93-HH12  
1868,445,OE2,441,HZ1,445-OE2-441-HZ1  
1869,445,OE1,441,HZ2,445-OE1-441-HZ2  
1870,445,OE2,93,HH22,445-OE2-93-HH22  
1871,445,OE1,93,HE,445-OE1-93-HE  
1872,445,OE2,464,HH12,445-OE2-464-HH12  
1873,445,OE1,464,HH22,445-OE1-464-HH22  
1874,445,OE2,441,HZ3,445-OE2-441-HZ3  
1875,445,OE1,93,HH22,445-OE1-93-HH22  
1876,445,OE2,93,HH12,445-OE2-93-HH12  
1877,445,OE1,464,HH12,445-OE1-464-HH12  
1878,445,OE2,93,HH21,445-OE2-93-HH21  
1879,445,O,93,HH22,445-O-93-HH22  
1880,445,OE1,93,HH21,445-OE1-93-HH21  
1881,445,OE1,444,HG,445-OE1-444-HG  
1882,445,OE2,464,HH22,445-OE2-464-HH22  
1883,446,O,448,H,446-O-448-H  
1884,448,O,415,HD21,448-O-415-HD21  
1885,449,O,451,H,449-O-451-H  
1886,449,O,411,HE22,449-O-411-HE22  
1887,450,O,457,H,450-O-457-H  
1888,450,O,456,HZ3,450-O-456-HZ3  
1889,450,O,456,HZ2,450-O-456-HZ2  
1890,451,O,456,HZ1,451-O-456-HZ1  
1891,451,O,456,HZ3,451-O-456-HZ3  
1892,451,O,456,HZ2,451-O-456-HZ2  
1893,453,O,456,HZ1,453-O-456-HZ1  
1894,453,O,456,HZ3,453-O-456-HZ3  
1895,453,O,456,HZ2,453-O-456-HZ2  
1896,453,O,456,H,453-O-456-H  
1897,455,O,135,HH12,455-O-135-HH12  
1898,455,NH1,106,HE,455-NH1-106-HE  
1899,456,O,135,HH22,456-O-135-HH22  
1900,456,O,135,HH12,456-O-135-HH12  
1901,457,O,456,HZ1,457-O-456-HZ1  
1902,457,O,456,HZ2,457-O-456-HZ2  
1903,457,O,456,HZ3,457-O-456-HZ3  
1904,458,O,139,HE22,458-O-139-HE22  
1905,458,O,139,HE21,458-O-139-HE21  
1906,458,O,461,HG1,458-O-461-HG1  
1907,458,O,461,H,458-O-461-H  
1908,459,O,462,H,459-O-462-H  
1909,459,O,463,H,459-O-463-H  
1910,460,OE2,461,HG1,460-OE2-461-HG1  
1911,460,O,464,H,460-O-464-H  
1912,460,OE2,456,HZ3,460-OE2-456-HZ3

1913,460,OE1,464,HH11,460-OE1-464-HH11  
1914,460,OE2,456,HZ1,460-OE2-456-HZ1  
1915,460,OE2,464,HH11,460-OE2-464-HH11  
1916,460,OE1,461,HG1,460-OE1-461-HG1  
1917,460,O,464,HE,460-O-464-HE  
1918,460,OE1,464,HE,460-OE1-464-HE  
1919,460,OE2,456,HZ2,460-OE2-456-HZ2  
1920,460,OE1,456,HZ3,460-OE1-456-HZ3  
1921,460,OE1,456,HZ2,460-OE1-456-HZ2  
1922,460,OE1,464,HH21,460-OE1-464-HH21  
1923,460,OE2,464,HE,460-OE2-464-HE  
1924,460,OE2,464,HH21,460-OE2-464-HH21  
1925,460,OE1,456,HZ1,460-OE1-456-HZ1  
1926,461,O,143,HZ1,461-O-143-HZ1  
1927,461,OG1,139,HE22,461-OG1-139-HE22  
1928,461,OG1,139,HE21,461-OG1-139-HE21  
1929,461,O,461,HG1,461-O-461-HG1  
1930,461,OG1,143,HZ1,461-OG1-143-HZ1  
1931,461,O,143,HZ2,461-O-143-HZ2  
1932,462,O,466,H,462-O-466-H  
1933,462,O,465,H,462-O-465-H  
1934,463,O,466,H,463-O-466-H  
1935,463,O,467,H,463-O-467-H  
1936,464,O,362,HH11,464-O-362-HH11  
1937,464,O,468,H,464-O-468-H  
1938,464,O,362,HH22,464-O-362-HH22  
1939,464,O,362,HH12,464-O-362-HH12  
1940,465,NE1,362,HH11,465-NE1-362-HH11  
1941,465,O,468,H,465-O-468-H  
1942,465,O,469,H,465-O-469-H  
1943,466,O,469,H,466-O-469-H  
1944,466,O,470,H,466-O-470-H  
1945,467,O,471,H,467-O-471-H  
1946,468,O,471,H,468-O-471-H  
1947,468,O,472,H,468-O-472-H  
1948,469,O,473,H,469-O-473-H  
1949,470,O,474,H,470-O-474-H  
1950,471,O,475,H,471-O-475-H  
1951,471,O,474,H,471-O-474-H  
1952,472,O,475,H,472-O-475-H  
1953,472,O,476,H,472-O-476-H  
1954,473,O,477,HH11,473-O-477-HH11  
1955,473,O,477,HH21,473-O-477-HH21  
1956,473,O,476,H,473-O-476-H  
1957,473,O,477,HE,473-O-477-HE  
1958,474,O,477,H,474-O-477-H  
1959,474,O,478,H,474-O-478-H  
1960,475,O,511,HH21,475-O-511-HH21  
1961,475,O,511,HE,475-O-511-HE  
1962,475,O,344,HE21,475-O-344-HE21  
1963,476,O,511,HE,476-O-511-HE  
1964,476,O,512,HG,476-O-512-HG  
1965,476,O,511,HH21,476-O-511-HH21  
1966,476,O,353,HE,476-O-353-HE  
1967,477,O,511,H,477-O-511-H  
1968,478,O,344,HE21,478-O-344-HE21  
1969,479,OE1,512,H,479-OE1-512-H  
1970,479,OE1,341,HE,479-OE1-341-HE  
1971,479,OE1,341,HH12,479-OE1-341-HH12  
1972,479,OE2,341,HH22,479-OE2-341-HH22  
1973,479,OE2,341,HH12,479-OE2-341-HH12  
1974,479,OE1,341,HH22,479-OE1-341-HH22  
1975,479,O,509,H,479-O-509-H  
1976,479,OE2,512,H,479-OE2-512-H  
1977,479,OE1,341,HH11,479-OE1-341-HH11  
1978,479,OE1,512,HG,479-OE1-512-HG  
1979,479,O,509,HE21,479-O-509-HE21  
1980,479,OE2,512,HG,479-OE2-512-HG  
1981,479,OE2,509,HE21,479-OE2-509-HE21  
1982,479,OE1,344,HE22,479-OE1-344-HE22  
1983,479,OE1,509,HE21,479-OE1-509-HE21  
1984,479,OE2,341,HE,479-OE2-341-HE  
1985,479,OE2,341,HH21,479-OE2-341-HH21  
1986,479,OE1,341,HH21,479-OE1-341-HH21  
1987,479,OE2,344,HE22,479-OE2-344-HE22  
1988,480,O,340,HE22,480-O-340-HE22  
1989,481,O,507,H,481-O-507-H  
1990,481,OG,507,HE21,481-OG-507-HE21  
1991,481,OG,482,H,481-OG-482-H  
1992,481,OG,509,HE22,481-OG-509-HE22

|                                      |                                        |
|--------------------------------------|----------------------------------------|
| 1993,482,O,481,HG,482-O-481-HG       | 2033,496,O,497,HG1,496-O-497-HG1       |
| 1994,483,O,487,HZ1,483-O-487-HZ1     | 2034,497,OG1,499,HZ3,497-OG1-499-HZ3   |
| 1995,483,O,487,HZ2,483-O-487-HZ2     | 2035,497,OG1,324,HG1,497-OG1-324-HG1   |
| 1996,483,O,485,H,483-O-485-H         | 2036,497,O,499,HZ1,497-O-499-HZ1       |
| 1997,483,O,486,H,483-O-486-H         | 2037,497,O,499,HZ3,497-O-499-HZ3       |
| 1998,483,O,487,HZ3,483-O-487-HZ3     | 2038,497,O,499,HZ2,497-O-499-HZ2       |
| 1999,484,O,486,H,484-O-486-H         | 2039,497,OG1,499,HZ1,497-OG1-499-HZ1   |
| 2000,485,O,487,HZ3,485-O-487-HZ3     | 2040,497,OG1,499,HZ2,497-OG1-499-HZ2   |
| 2001,485,O,487,HZ1,485-O-487-HZ1     | 2041,498,O,328,HE1,498-O-328-HE1       |
| 2002,485,O,487,HZ2,485-O-487-HZ2     | 2042,499,O,493,H,499-O-493-H           |
| 2003,486,O,488,H,486-O-488-H         | 2043,500,NE2,327,HG,500-NE2-327-HG     |
| 2004,486,O,487,HZ1,486-O-487-HZ1     | 2044,500,NE2,502,H,500-NE2-502-H       |
| 2005,486,O,505,HE2,486-O-505-HE2     | 2045,500,NE2,503,H,500-NE2-503-H       |
| 2006,487,O,505,HE2,487-O-505-HE2     | 2046,500,O,500,HD1,500-O-500-HD1       |
| 2007,487,O,489,H,487-O-489-H         | 2047,500,O,502,H,500-O-502-H           |
| 2008,488,O,487,HZ1,488-O-487-HZ1     | 2048,501,O,500,HD1,501-O-500-HD1       |
| 2009,488,O,487,HZ2,488-O-487-HZ2     | 2049,501,O,503,H,501-O-503-H           |
| 2010,488,O,487,HZ3,488-O-487-HZ3     | 2050,502,O,487,HZ2,502-O-487-HZ2       |
| 2011,489,OD1,487,HZ3,489-OD1-487-HZ3 | 2051,502,O,185,HD22,502-O-185-HD22     |
| 2012,489,OD1,491,HG1,489-OD1-491-HG1 | 2052,502,O,487,HZ1,502-O-487-HZ1       |
| 2013,489,OD2,491,H,489-OD2-491-H     | 2053,502,O,504,H,502-O-504-H           |
| 2014,489,O,491,H,489-O-491-H         | 2054,502,O,185,HD21,502-O-185-HD21     |
| 2015,489,OD1,487,HZ1,489-OD1-487-HZ1 | 2055,503,O,505,H,503-O-505-H           |
| 2016,489,OD2,491,HG1,489-OD2-491-HG1 | 2056,503,O,185,HD22,503-O-185-HD22     |
| 2017,489,O,491,HG1,489-O-491-HG1     | 2057,504,OE1,188,HH22,504-OE1-188-HH22 |
| 2018,489,OD1,489,H,489-OD1-489-H     | 2058,504,OE1,185,HD22,504-OE1-185-HD22 |
| 2019,489,O,501,H,489-O-501-H         | 2059,504,OE2,188,HH21,504-OE2-188-HH21 |
| 2020,489,OD2,490,H,489-OD2-490-H     | 2060,504,OE1,188,HH12,504-OE1-188-HH12 |
| 2021,489,OD2,487,HZ3,489-OD2-487-HZ3 | 2061,504,OE2,188,HH12,504-OE2-188-HH12 |
| 2022,489,OD1,491,H,489-OD1-491-H     | 2062,504,OE2,188,HE,504-OE2-188-HE     |
| 2023,489,OD1,487,HZ2,489-OD1-487-HZ2 | 2063,504,OE1,188,HH21,504-OE1-188-HH21 |
| 2024,489,OD1,490,H,489-OD1-490-H     | 2064,504,OE1,188,HE,504-OE1-188-HE     |
| 2025,490,O,501,H,490-O-501-H         | 2065,504,OE2,185,HD22,504-OE2-185-HD22 |
| 2026,490,O,491,HG1,490-O-491-HG1     | 2066,504,OE2,188,HH22,504-OE2-188-HH22 |
| 2027,491,O,501,H,491-O-501-H         | 2067,505,ND1,505,H,505-ND1-505-H       |
| 2028,492,O,57,HZ2,492-O-57-HZ2       | 2068,505,ND1,504,H,505-ND1-504-H       |
| 2029,492,O,58,HD21,492-O-58-HD21     | 2069,506,O,184,H,506-O-184-H           |
| 2030,493,O,499,H,493-O-499-H         | 2070,507,OE1,481,HG,507-OE1-481-HG     |
| 2031,494,OH,230,HG,494-OH-230-HG     | 2071,507,OE1,183,HE2,507-OE1-183-HE2   |
| 2032,494,O,222,HD22,494-O-222-HD22   | 2072,507,O,481,H,507-O-481-H           |

2073,507,OE1,505,HE2,507-OE1-505-HE2  
2074,507,OE1,509,HE22,507-OE1-509-HE22  
2075,508,O,509,HE21,508-O-509-HE21  
2076,509,OE1,481,HG,509-OE1-481-HG  
2077,509,O,479,H,509-O-479-H  
2078,509,OE1,175,HE22,509-OE1-175-HE22  
2079,509,OE1,510,H,509-OE1-510-H  
2080,509,OE1,507,HE21,509-OE1-507-HE21  
2081,510,O,509,HE21,510-O-509-HE21  
2082,511,O,512,HG,511-O-512-HG  
2083,511,NH1,353,HH21,511-NH1-353-HH21  
2084,511,O,353,HH12,511-O-353-HH12  
2085,511,O,353,HH22,511-O-353-HH22  
2086,512,OG,353,HH11,512-OG-353-HH11  
2087,512,O,353,HH22,512-O-353-HH22  
2088,512,O,353,HH12,512-O-353-HH12  
2089,512,OXT,353,HH12,512-OXT-353-HH12  
2090,512,OXT,353,HH22,512-OXT-353-HH22  
2091,512,O,353,HH11,512-O-353-HH11  
2092,512,OXT,511,HH11,512-OXT-511-HH11  
2093,512,OXT,353,HH11,512-OXT-353-HH11  
2094,512,OG,353,HH12,512-OG-353-HH12  
2095,512,O,512,HG,512-O-512-HG  
2096,512,OXT,512,HG,512-OXT-512-HG  
2097,513,O2A,106,HH22,513-O2A-106-HH22  
2098,513,O2D,106,HH21,513-O2D-106-HH21  
2099,513,O1D,131,HE1,513-O1D-131-HE1  
2100,513,O1D,455,HH11,513-O1D-455-HH11  
2101,513,O1A,452,H,513-O1A-452-H  
2102,513,O2A,106,HH12,513-O2A-106-HH12  
2103,513,O1D,135,HH11,513-O1D-135-HH11  
2104,513,O2D,106,HE,513-O2D-106-HE  
2105,513,O2A,388,HD1,513-O2A-388-HD1  
2106,513,O2D,455,HH11,513-O2D-455-HH11  
2107,515,O1,516,H9,515-O1-516-H9
